# Supplementary material for: Genome-scale targeted mutagenesis inBrassica napususing a pooled CRISPR library
Source: HighWire-hosted journal article supplement (doi:10.1101/gr.277650.123), 2023-05-01
Supplement: Supplemental_Code.zip [file zs11_darmor_expression.xlsx]

## Sheet: gene_index
BnaA10G0008800ZS	BnaA10g00800D
BnaC05G0010300ZS	BnaC05g00860D
BnaA10G0008500ZS	BnaA10g00770D
BnaC05G0010000ZS	BnaC05g00830D
BnaA09G0693100ZS	BnaA09g51530D
BnaA09G0694500ZS	BnaA10g00600D
BnaC05G0008300ZS	BnaC05g00670D
BnaA09G0715900ZS	BnaCnng08630D
BnaA10G0005200ZS	BnaA10g00490D
BnaC05G0007300ZS	BnaC05g00550D
BnaC03G0000500ZS	BnaCnng23520D
BnaA10G0005000ZS	BnaA10g00470D
BnaC05G0007100ZS	BnaC05g00530D
BnaC05G0006800ZS	BnaC05g00500D
BnaA10G0004100ZS	BnaA10g00380D
BnaC05G0006000ZS	BnaC05g00460D
BnaA09G0695600ZS	BnaCnng08760D
BnaA09G0003700ZS	BnaCnng08770D
BnaA10G0002600ZS	BnaA10g00230D
BnaC05G0004400ZS	BnaC05g00310D
BnaA09G0718200ZS	BnaCnng08890D
BnaA10G0001200ZS	BnaA10g00110D
BnaA10G0000700ZS	BnaA10g00050D
BnaC05G0002600ZS	BnaC05g00070D
BnaA09G0721100ZS	BnaCnng09170D
BnaC09G0203700ZS	BnaC09g16050D
BnaA09G0698500ZS	BnaCnng09200D
BnaA10G0011500ZS	BnaA10g01090D
BnaC05G0013400ZS	BnaC05g01190D
BnaC03G0001600ZS	BnaC03g71360D
BnaC09G0399500ZS	BnaC09g33330D
BnaA09G0691300ZS	BnaA09g51320D
BnaA10G0012600ZS	BnaA10g01220D
BnaC05G0014600ZS	BnaC05g01310D
BnaA08G0321400ZS	BnaA08g27210D
BnaA10G0013100ZS	BnaA10g01290D
BnaC05G0015000ZS	BnaC05g01350D
BnaC08G0001800ZS	BnaCnng71120D
BnaA10G0013800ZS	BnaA10g01380D
BnaC05G0015700ZS	BnaC05g01420D
BnaA10G0014000ZS	BnaA10g01410D
BnaC05G0015900ZS	BnaC05g01450D
BnaC05G0017900ZS	BnaC05g01680D
BnaA10G0016700ZS	BnaA10g01730D
BnaA02G0050800ZS	BnaC05g01770D
BnaA10G0016800ZS	BnaA10g01740D
BnaC05G0018700ZS	BnaC05g01780D
BnaA10G0018700ZS	BnaA10g01950D
BnaC05G0020900ZS	BnaCnng43150D
BnaA09G0687800ZS	BnaA09g50930D
BnaA09G0709400ZS	BnaA09g50900D
BnaA08G0318000ZS	BnaA08g27570D
BnaA10G0021600ZS	BnaA10g02150D
BnaC05G0022800ZS	BnaC05g02070D
BnaC08G0006900ZS	BnaC08g00330D
BnaA10G0022400ZS	BnaA10g02240D
BnaA08G0316400ZS	BnaA08g27750D
BnaA10G0024400ZS	BnaA10g02480D
BnaC05G0025600ZS	BnaC05g02350D
BnaA08G0315300ZS	BnaA08g27870D
BnaC05G0027100ZS	BnaC05g02520D
BnaC08G0010400ZS	BnaC08g00670D
BnaA08G0314900ZS	BnaA08g27910D
BnaA09G0683300ZS	BnaAnng12160D
BnaC08G0011000ZS	BnaC08g00710D
BnaA09G0682900ZS	BnaAnng12210D
BnaC05G0028500ZS	BnaC05g02660D
BnaA09G0704400ZS	BnaC08g50150D
BnaA10G0027600ZS	BnaA10g02720D
BnaC05G0028900ZS	BnaC05g02700D
BnaC02G0167500ZS	BnaAnng21610D
BnaA10G0106100ZS	BnaAnng36410D
BnaA09G0703400ZS	BnaA09g50510D
BnaA08G0312300ZS	BnaA08g28140D
BnaA10G0030900ZS	BnaA10g03090D
BnaC05G0032300ZS	BnaC05g02960D
BnaC08G0015400ZS	BnaC08g01080D
BnaA10G0033500ZS	BnaA10g03220D
BnaC05G0035400ZS	BnaC05g03230D
BnaA09G0701800ZS	BnaAnng16240D
BnaC05G0036800ZS	BnaC05g03410D
BnaC08G0513000ZS	BnaC08g44210D
BnaA10G0036700ZS	BnaA10g03550D
BnaC05G0037300ZS	BnaC05g03470D
BnaA09G0680500ZS	BnaA09g50330D
BnaC05G0038000ZS	BnaC05g03540D
BnaA10G0037700ZS	BnaA10g03640D
BnaC05G0038200ZS	BnaC05g03560D
BnaA10G0038200ZS	BnaA10g03690D
BnaC05G0038700ZS	BnaC05g03600D
BnaA10G0038400ZS	BnaA10g03720D
BnaC05G0039000ZS	BnaC05g03640D
BnaC05G0039400ZS	BnaC05g03670D
BnaA10G0039000ZS	BnaA10g03810D
BnaC05G0039900ZS	BnaC05g03720D
BnaA08G0310600ZS	BnaA08g28320D
BnaA09G0679900ZS	BnaA09g50250D
BnaA10G0039200ZS	BnaA10g03830D
BnaC05G0040200ZS	BnaC05g03750D
BnaC08G0018700ZS	BnaC08g01360D
BnaA08G0308700ZS	BnaA08g28420D
BnaA09G0678200ZS	BnaA09g50090D
BnaA10G0041800ZS	BnaA10g03990D
BnaC08G0021600ZS	BnaC08g01640D
BnaA09G0677900ZS	BnaA09g50060D
BnaA10G0042600ZS	BnaA10g04080D
BnaC05G0043900ZS	BnaC05g04200D
BnaA10G0043100ZS	BnaA10g04110D
BnaC05G0044300ZS	BnaC05g04240D
BnaA10G0044200ZS	BnaA10g28030D
BnaC05G0045100ZS	BnaC05g04310D
BnaA10G0045000ZS	BnaA10g28060D
BnaC05G0045500ZS	BnaC05g04350D
BnaA10G0045100ZS	BnaA10g28090D
BnaC05G0045700ZS	BnaC05g04370D
BnaA10G0045200ZS	BnaA10g28080D
BnaC05G0045600ZS	BnaC05g04360D
BnaA10G0046400ZS	BnaA10g04260D
BnaC05G0047100ZS	BnaC05g04490D
BnaA07G0008600ZS	BnaA07g00970D
BnaC03G0426000ZS	BnaCnng47210D
BnaA10G0053600ZS	BnaA10g04840D
BnaC05G0053800ZS	BnaC05g05180D
BnaA06G0044200ZS	BnaA06g04170D
BnaA09G0669700ZS	BnaA09g49270D
BnaC05G0055700ZS	BnaC05g05340D
BnaA06G0045100ZS	BnaA06g04280D
BnaA08G0301900ZS	BnaAnng15520D
BnaC08G0032100ZS	BnaCnng52900D
BnaC05G0056900ZS	BnaCnng58900D
BnaA06G0045900ZS	BnaA06g04380D
BnaA09G0668700ZS	BnaA09g49190D
BnaA08G0301400ZS	BnaAnng15470D
BnaC05G0057800ZS	BnaC05g05550D
BnaC08G0032700ZS	BnaC08g02340D
BnaC08G0533800ZS	BnaC08g43490D
BnaA06G0048300ZS	BnaA06g04630D
BnaA09G0667300ZS	BnaA09g49000D
BnaA08G0300700ZS	BnaAnng33810D
BnaC05G0060200ZS	BnaC05g05830D
BnaC08G0033400ZS	BnaC08g02440D
BnaC08G0532300ZS	BnaC08g43330D
BnaA06G0048900ZS	BnaA06g04690D
BnaC05G0060800ZS	BnaC05g05920D
BnaA09G0666400ZS	BnaA09g48930D
BnaC08G0034200ZS	BnaAnng28130D
BnaC08G0531300ZS	BnaC08g43210D
BnaA09G0665700ZS	BnaAnng26510D
BnaC08G0184300ZS	BnaC08g13600D
BnaC05G0063400ZS	BnaC05g06160D
BnaA06G0050900ZS	BnaA06g04910D
BnaC05G0063500ZS	BnaC05g06170D
BnaC05G0064400ZS	BnaC05g06260D
BnaA06G0051700ZS	BnaA06g05010D
BnaC05G0064500ZS	BnaC05g06270D
BnaA06G0051900ZS	BnaA06g05030D
BnaA09G0665200ZS	BnaA09g48780D
BnaC05G0064800ZS	BnaC05g06300D
BnaC08G0529800ZS	BnaC08g43040D
BnaA08G0298200ZS	BnaA08g26800D
BnaC08G0187500ZS	BnaCnng47820D
BnaA06G0052400ZS	BnaA06g05070D
BnaC05G0065200ZS	BnaC05g06340D
BnaC08G0529400ZS	BnaC08g43000D
BnaA08G0297800ZS	BnaA08g26750D
BnaC08G0189000ZS	BnaCnng06440D
BnaA09G0664600ZS	BnaA09g48710D
BnaC08G0529100ZS	BnaC08g42960D
BnaA06G0054000ZS	BnaA06g05230D
BnaC05G0066900ZS	BnaC05g06520D
BnaA09G0663000ZS	BnaA09g48550D
BnaC08G0527500ZS	BnaC08g42790D
BnaA06G0057000ZS	BnaA06g37930D
BnaC05G0071400ZS	BnaC05g06980D
BnaA06G0057500ZS	BnaA06g37850D
BnaA09G0661900ZS	BnaA09g48450D
BnaC05G0072500ZS	BnaC05g07080D
BnaC08G0525200ZS	BnaC08g42700D
BnaA06G0057600ZS	BnaA06g05440D
BnaA08G0294000ZS	BnaA08g26320D
BnaC08G0525100ZS	BnaC08g42690D
BnaC05G0072600ZS	BnaCnng19930D
BnaA06G0059300ZS	BnaA06g05600D
BnaA08G0292900ZS	BnaA08g26200D
BnaC05G0074600ZS	BnaC05g07140D
BnaC08G0196000ZS	BnaC08g13800D
BnaA06G0059600ZS	BnaA06g05630D
BnaC05G0075000ZS	BnaA08g26190D
BnaC04G0337400ZS	BnaCnng47570D
BnaA08G0292300ZS	BnaA08g26140D
BnaC08G0196600ZS	BnaC08g13860D
BnaA06G0064200ZS	BnaA06g06000D
BnaC05G0079800ZS	BnaC05g07550D
BnaA06G0066700ZS	BnaA06g06240D
BnaA09G0657800ZS	BnaA09g48160D
BnaC05G0082300ZS	BnaC05g07990D
BnaC08G0202000ZS	BnaC08g14280D
BnaA09G0449400ZS	BnaA09g54580D
BnaC05G0209000ZS	BnaC05g18940D
BnaA05G0121700ZS	BnaC03g64210D
BnaA06G0069600ZS	BnaA06g06610D
BnaC05G0086700ZS	BnaC05g08260D
BnaA06G0070800ZS	BnaA06g06720D
BnaC05G0088000ZS	BnaC05g08400D
BnaA09G0656100ZS	BnaA09g47890D
BnaC08G0515300ZS	BnaC08g42240D
BnaA06G0071500ZS	BnaA06g06790D
BnaA09G0656400ZS	BnaA09g47920D
BnaC05G0088900ZS	BnaC05g08450D
BnaA06G0072200ZS	BnaA06g06870D
BnaA09G0653900ZS	BnaA09g47730D
BnaA09G0656700ZS	BnaA09g47990D
BnaC05G0089600ZS	BnaC05g08510D
BnaC08G0514400ZS	BnaC08g42180D
BnaA08G0284600ZS	BnaA08g25340D
BnaC08G0208600ZS	BnaC08g14910D
BnaC08G0211200ZS	BnaA08g31650D
BnaA06G0075600ZS	BnaA06g07270D
BnaA09G0651300ZS	BnaA09g47500D
BnaC08G0212700ZS	BnaC08g41780D
BnaA06G0085700ZS	BnaA06g08410D
BnaA09G0650000ZS	BnaA09g47420D
BnaC05G0105700ZS	BnaC05g09780D
BnaC08G0509300ZS	BnaC08g41650D
BnaC08G0509500ZS	BnaC08g41670D
BnaA08G0280300ZS	BnaA08g24910D
BnaC08G0214700ZS	BnaC08g15360D
BnaA06G0083600ZS	BnaA06g08290D
BnaA09G0648300ZS	BnaA09g47260D
BnaC05G0103400ZS	BnaC05g09630D
BnaC08G0215400ZS	BnaC08g15440D
BnaA06G0083000ZS	BnaA06g08170D
BnaC05G0102200ZS	BnaC05g09420D
BnaA09G0647600ZS	BnaA09g47140D
BnaA06G0082700ZS	BnaA06g08140D
BnaC05G0102000ZS	BnaC05g09400D
BnaA08G0278200ZS	BnaAnng36290D
BnaC08G0218200ZS	BnaC08g15650D
BnaA06G0081400ZS	BnaA06g08020D
BnaC05G0100600ZS	BnaCnng31560D
BnaA09G0644500ZS	BnaA09g46770D
BnaC01G0101100ZS	BnaCnng47790D
BnaC01G0101000ZS	BnaCnng47800D
BnaA09G0644100ZS	BnaA09g46720D
BnaC08G0502000ZS	BnaC08g40750D
BnaA06G0077500ZS	BnaA06g07460D
BnaC08G0499300ZS	BnaA09g46350D
BnaC05G0095900ZS	BnaC05g08940D
BnaC05G0094100ZS	BnaA06g07380D
BnaA01G0404200ZS	BnaA05g33200D
BnaC05G0556200ZS	BnaC05g47450D
BnaA09G0639900ZS	BnaA09g46200D
BnaC08G0497200ZS	BnaC08g40260D
BnaA06G0088700ZS	BnaA06g08740D
BnaA09G0639400ZS	BnaA09g57150D
BnaC05G0109200ZS	BnaC05g10050D
BnaC08G0496800ZS	BnaC08g40210D
BnaA09G0643000ZS	BnaA09g46550D
BnaC05G0110000ZS	BnaC05g10140D
BnaA06G0089500ZS	BnaA06g08830D
BnaA06G0090300ZS	BnaA06g08910D
BnaC05G0110900ZS	BnaC05g10230D
BnaA06G0094300ZS	BnaA06g09270D
BnaA09G0633400ZS	BnaA09g57080D
BnaC05G0115600ZS	BnaC05g10680D
BnaC08G0491200ZS	BnaC08g39630D
BnaA06G0097100ZS	BnaA06g09540D
BnaC05G0119300ZS	BnaC05g10910D
BnaA08G0270200ZS	BnaA08g31390D
BnaC08G0231300ZS	BnaC08g16440D
BnaA09G0628700ZS	BnaAnng23770D
BnaC08G0486300ZS	BnaC08g39040D
BnaA06G0103000ZS	BnaA06g10040D
BnaA08G0268600ZS	BnaA08g23880D
BnaC05G0127700ZS	BnaC05g11660D
BnaC08G0233100ZS	BnaC08g16630D
BnaC08G0485100ZS	BnaCnng57070D
BnaC05G0128500ZS	BnaC05g11740D
BnaC05G0129800ZS	BnaC05g11890D
BnaA07G0388500ZS	BnaA07g35600D
BnaC06G0456800ZS	BnaC06g40530D
BnaA06G0106100ZS	BnaA06g10370D
BnaA09G0625600ZS	BnaA09g56690D
BnaC05G0131200ZS	BnaC05g11960D
BnaC08G0483000ZS	BnaC08g38720D
BnaA06G0108500ZS	BnaA06g10760D
BnaC05G0134000ZS	BnaC05g12270D
BnaA06G0111800ZS	BnaAnng27380D
BnaC05G0137600ZS	BnaCnng29510D
BnaA06G0112500ZS	BnaA06g38380D
BnaA09G0621800ZS	BnaA09g56260D
BnaC08G0478100ZS	BnaC08g38320D
BnaA06G0112700ZS	BnaA06g11140D
BnaC05G0138600ZS	BnaC05g12680D
BnaC08G0238300ZS	BnaC08g17160D
BnaA09G0620100ZS	BnaA09g45180D
BnaC08G0475600ZS	BnaC08g38000D
BnaA06G0116800ZS	BnaA06g38410D
BnaA08G0263500ZS	BnaA08g23330D
BnaC05G0144000ZS	BnaC05g13250D
BnaC08G0238600ZS	BnaC08g17200D
BnaA08G0262900ZS	BnaA08g23240D
BnaA06G0118100ZS	BnaA06g11550D
BnaC05G0145500ZS	BnaC05g13400D
BnaA08G0261700ZS	BnaA08g23120D
BnaA09G0617700ZS	BnaA09g45010D
BnaC08G0240500ZS	BnaC08g48320D
BnaC05G0148600ZS	BnaC05g13680D
BnaA06G0120800ZS	BnaA06g11860D
BnaA08G0260800ZS	BnaA08g23020D
BnaC08G0241200ZS	BnaC08g17460D
BnaA08G0260200ZS	BnaA08g22960D
BnaC03G0439000ZS	BnaC03g41120D
BnaC08G0241800ZS	BnaC08g17530D
BnaA06G0123900ZS	BnaA06g12320D
BnaA09G0615100ZS	BnaA09g44700D
BnaC05G0152000ZS	BnaC05g50120D
BnaC08G0470600ZS	BnaC08g37400D
BnaA09G0614300ZS	BnaA09g44630D
BnaA09G0614500ZS	BnaA09g44650D
BnaC08G0469900ZS	BnaC08g37340D
BnaA08G0257400ZS	BnaA08g22670D
BnaC02G0535100ZS	BnaC02g42470D
BnaC08G0245000ZS	BnaC08g17900D
BnaA09G0614000ZS	BnaA09g44600D
BnaC08G0469600ZS	BnaC08g37310D
BnaA06G0126600ZS	BnaA06g12580D
BnaA08G0257100ZS	BnaA08g22640D
BnaC05G0154800ZS	BnaC05g14140D
BnaC08G0245900ZS	BnaC08g17980D
BnaA06G0127500ZS	BnaA06g12660D
BnaC05G0155700ZS	BnaC05g14220D
BnaA06G0128000ZS	BnaA06g12710D
BnaC05G0156100ZS	BnaC05g14260D
BnaA06G0129000ZS	BnaA06g12800D
BnaA08G0255900ZS	BnaA08g22510D
BnaC05G0156700ZS	BnaC05g14320D
BnaC08G0247600ZS	BnaC08g18180D
BnaC05G0157500ZS	BnaC05g50150D
BnaA08G0252900ZS	BnaA08g22180D
BnaC08G0251600ZS	BnaC08g18640D
BnaC05G0163900ZS	BnaA06g13570D
BnaA06G0135600ZS	BnaA06g13650D
BnaA09G0609000ZS	BnaA09g44160D
BnaC08G0462700ZS	BnaC08g36720D
BnaA06G0139100ZS	BnaA06g13970D
BnaC07G0066400ZS	BnaC07g05440D
BnaC05G0167800ZS	BnaCnng57210D
BnaA06G0139200ZS	BnaA06g38530D
BnaA08G0250500ZS	BnaA08g21930D
BnaC08G0255600ZS	BnaC08g19190D
BnaC05G0167900ZS	BnaCnng52870D
BnaA06G0139800ZS	BnaA06g14040D
BnaA07G0137300ZS	BnaA07g11660D
BnaA08G0250200ZS	BnaA08g31250D
BnaC05G0168800ZS	BnaC05g15390D
BnaC07G0199900ZS	BnaC07g48490D
BnaC08G0256200ZS	BnaC08g19040D
BnaC07G0197400ZS	BnaC07g14810D
BnaA08G0248600ZS	BnaA08g31140D
BnaC08G0258200ZS	BnaCnng26830D
BnaA07G0135300ZS	BnaAnng14670D
BnaC07G0196800ZS	BnaCnng55000D
BnaC08G0258300ZS	BnaAnng30030D
BnaA07G0135200ZS	BnaAnng14660D
BnaA01G0196900ZS	BnaA01g18610D
BnaA01G0091400ZS	BnaC09g31190D
BnaA06G0142500ZS	BnaA06g14330D
BnaC07G0196100ZS	BnaC07g15490D
BnaC05G0176200ZS	BnaC05g16020D
BnaA07G0131100ZS	BnaA07g11270D
BnaA08G0246200ZS	BnaA08g21660D
BnaC07G0192900ZS	BnaC07g15170D
BnaC08G0262000ZS	BnaC08g19460D
BnaA06G0146800ZS	BnaA06g14680D
BnaA08G0245700ZS	BnaA08g21610D
BnaC05G0177400ZS	BnaC05g16060D
BnaC08G0262500ZS	BnaC08g19500D
BnaA07G0130000ZS	BnaA07g11180D
BnaC03G0451900ZS	BnaC03g42470D
BnaC03G0455100ZS	BnaC03g42860D
BnaC07G0191900ZS	BnaC07g15060D
BnaC08G0409900ZS	BnaC08g30100D
BnaC05G0182300ZS	BnaC05g16460D
BnaA06G0151500ZS	BnaA06g15130D
BnaC05G0184300ZS	BnaC05g16650D
BnaA06G0153800ZS	BnaA06g15360D
BnaC05G0187200ZS	BnaC05g16940D
BnaA08G0242700ZS	BnaA08g21220D
BnaC08G0267800ZS	BnaC08g48410D
BnaA06G0155400ZS	BnaA06g15520D
BnaC05G0189000ZS	BnaC05g17130D
BnaA09G0465400ZS	BnaAnng04140D
BnaA08G0241200ZS	BnaA08g21050D
BnaC08G0270200ZS	BnaC08g20070D
BnaA08G0318300ZS	BnaA08g27550D
BnaC08G0186400ZS	BnaC08g07190D
BnaC08G0185900ZS	BnaCnng74620D
BnaA08G0240000ZS	BnaA08g20930D
BnaC08G0271400ZS	BnaC08g05830D
BnaA07G0236100ZS	BnaA07g20670D
BnaA07G0373100ZS	BnaA07g34050D
BnaC06G0256600ZS	BnaC06g20530D
BnaC06G0438700ZS	BnaC06g38690D
BnaA07G0121600ZS	BnaA07g10370D
BnaC07G0179000ZS	BnaCnng65680D
BnaA08G0238300ZS	BnaA08g20740D
BnaA09G0458700ZS	BnaA09g30390D
BnaC05G0198400ZS	BnaC05g18020D
BnaA07G0120400ZS	BnaA07g10270D
BnaA09G0458400ZS	BnaA09g30360D
BnaC05G0198700ZS	BnaC05g18050D
BnaC07G0177500ZS	BnaC07g13470D
BnaA07G0120300ZS	BnaA07g10260D
BnaA09G0458200ZS	BnaA09g30340D
BnaC05G0198900ZS	BnaC05g18090D
BnaC07G0177400ZS	BnaC07g13460D
BnaA09G0457800ZS	BnaA09g30300D
BnaC05G0199300ZS	BnaC05g18130D
BnaA09G0457100ZS	BnaA09g30250D
BnaC05G0200200ZS	BnaC05g18230D
BnaA09G0457000ZS	BnaA09g30240D
BnaC08G0274100ZS	BnaC08g06110D
BnaA08G0238100ZS	BnaA08g20710D
BnaA07G0119000ZS	BnaA07g10150D
BnaC07G0175800ZS	BnaC07g13310D
BnaA09G0454900ZS	BnaA09g30050D
BnaC05G0203500ZS	BnaC05g18500D
BnaA09G0454400ZS	BnaA09g30000D
BnaC08G0275400ZS	BnaC08g06250D
BnaC05G0204200ZS	BnaC05g18550D
BnaA07G0117200ZS	BnaA07g09980D
BnaA09G0452100ZS	BnaA09g31050D
BnaC05G0206300ZS	BnaC05g18750D
BnaC07G0173800ZS	BnaC07g13110D
BnaA07G0116700ZS	BnaA07g09940D
BnaC07G0173400ZS	BnaC07g48300D
BnaA09G0448500ZS	BnaA09g29830D
BnaC05G0210500ZS	BnaC05g50810D
BnaA07G0100900ZS	BnaA07g08950D
BnaC07G0152600ZS	BnaC07g11300D
BnaA07G0101500ZS	BnaA07g09010D
BnaC07G0153400ZS	BnaC07g11230D
BnaA07G0101800ZS	BnaA07g09040D
BnaC07G0153700ZS	BnaC07g11200D
BnaA07G0102200ZS	BnaA07g36830D
BnaC07G0154300ZS	BnaC07g11120D
BnaA07G0103000ZS	BnaA07g36770D
BnaC07G0154900ZS	BnaC07g11050D
BnaC03G0633800ZS	BnaA08g19200D
BnaA09G0436000ZS	BnaA09g28460D
BnaC05G0227200ZS	BnaC05g20730D
BnaA08G0227400ZS	BnaA08g19480D
BnaA09G0438500ZS	BnaA09g28640D
BnaC05G0225100ZS	BnaC05g20570D
BnaA08G0227500ZS	BnaA08g19490D
BnaA09G0438900ZS	BnaA09g28670D
BnaC05G0224800ZS	BnaC05g20560D
BnaC03G0630000ZS	BnaCnng04580D
BnaA07G0106800ZS	BnaA07g37100D
BnaA08G0228200ZS	BnaA08g19570D
BnaC07G0160900ZS	BnaC07g11970D
BnaC03G0629100ZS	BnaCnng29620D
BnaA08G0229100ZS	BnaA08g19670D
BnaC03G0627900ZS	BnaCnng04490D
BnaA08G0229400ZS	BnaA08g19710D
BnaC03G0627700ZS	BnaC03g56640D
BnaA09G0444200ZS	BnaA09g29300D
BnaC08G0283300ZS	BnaCnng12340D
BnaA07G0111300ZS	BnaA07g09200D
BnaC07G0168200ZS	BnaC07g12690D
BnaA09G0430400ZS	BnaA09g27940D
BnaC05G0234900ZS	BnaC05g21290D
BnaC03G0639000ZS	BnaC03g57710D
BnaA07G0095700ZS	BnaA07g08550D
BnaC07G0146100ZS	BnaC07g10600D
BnaA07G0095500ZS	BnaA07g08530D
BnaA09G0424200ZS	BnaA09g27390D
BnaC07G0145900ZS	BnaC07g10580D
BnaA07G0095400ZS	BnaA07g08500D
BnaA09G0424100ZS	BnaA09g27380D
BnaC05G0244700ZS	BnaC05g50460D
BnaC07G0145400ZS	BnaC07g10500D
BnaA09G0423700ZS	BnaA09g27350D
BnaC05G0245300ZS	BnaC05g21780D
BnaA08G0213400ZS	BnaA08g18370D
BnaA09G0423200ZS	BnaA09g27290D
BnaC03G0651200ZS	BnaC03g58590D
BnaA07G0093600ZS	BnaA07g08280D
BnaC05G0247900ZS	BnaC05g21950D
BnaC05G0248200ZS	BnaC05g21980D
BnaC07G0142900ZS	BnaC07g10240D
BnaA07G0092000ZS	BnaA07g08200D
BnaA08G0211000ZS	BnaA08g18150D
BnaC03G0654500ZS	BnaC03g58910D
BnaC05G0250200ZS	BnaC05g22110D
BnaC07G0141300ZS	BnaCnng62360D
BnaC07G0141000ZS	BnaA07g08180D
BnaA08G0210800ZS	BnaA08g18130D
BnaA09G0419600ZS	BnaA09g54180D
BnaC03G0654700ZS	BnaC03g58930D
BnaC05G0250400ZS	BnaC05g22130D
BnaA08G0210700ZS	BnaA08g18120D
BnaC03G0655000ZS	BnaC03g58940D
BnaA09G0418300ZS	BnaA09g26980D
BnaC05G0251900ZS	BnaC05g22310D
BnaA08G0209600ZS	BnaA08g17990D
BnaA09G0417500ZS	BnaA09g26900D
BnaC03G0656400ZS	BnaAnng21400D
BnaC05G0252200ZS	BnaC05g22350D
BnaA07G0090700ZS	BnaA07g08020D
BnaC07G0140000ZS	BnaC07g09950D
BnaA07G0088700ZS	BnaA07g07790D
BnaA08G0208300ZS	BnaA08g17830D
BnaC03G0658600ZS	BnaC03g59260D
BnaC07G0137700ZS	BnaC07g09690D
BnaA08G0208200ZS	BnaA08g17820D
BnaC03G0658700ZS	BnaC03g59270D
BnaA08G0207900ZS	BnaA08g17760D
BnaA09G0415200ZS	BnaA09g26670D
BnaC03G0659800ZS	BnaC03g59440D
BnaA08G0207800ZS	BnaA08g17750D
BnaC03G0659900ZS	BnaC03g59450D
BnaA09G0415100ZS	BnaC05g22730D
BnaA08G0204500ZS	BnaA08g17390D
BnaA09G0410300ZS	BnaA09g26170D
BnaC03G0665100ZS	BnaC03g59640D
BnaA07G0085000ZS	BnaA07g07350D
BnaC07G0130800ZS	BnaA09g26150D
BnaC05G0262500ZS	BnaC05g23260D
BnaA09G0409100ZS	BnaA09g26050D
BnaC05G0264200ZS	BnaC05g23470D
BnaA09G0408700ZS	BnaA09g26010D
BnaC05G0264700ZS	BnaC05g23530D
BnaA09G0407700ZS	BnaA09g25910D
BnaC03G0392600ZS	BnaC03g37440D
BnaC05G0265700ZS	BnaC05g23630D
BnaA08G0086700ZS	BnaAnng11240D
BnaC08G0124000ZS	BnaC08g09370D
BnaA09G0402900ZS	BnaA09g25540D
BnaC05G0270100ZS	BnaCnng11050D
BnaA09G0402800ZS	BnaA09g25530D
BnaA08G0086600ZS	BnaAnng11220D
BnaC05G0270200ZS	BnaCnng11040D
BnaA09G0401500ZS	BnaA09g25390D
BnaC05G0271400ZS	BnaCnng10910D
BnaA08G0082900ZS	BnaA08g07680D
BnaC05G0276500ZS	BnaA09g24940D
BnaA09G0397600ZS	BnaA09g25140D
BnaC08G0117100ZS	BnaC08g08440D
BnaA05G0326300ZS	BnaA05g16330D
BnaA08G0075600ZS	BnaA08g06960D
BnaC05G0343500ZS	BnaC05g28890D
BnaC08G0107200ZS	BnaCnng35920D
BnaC08G0106700ZS	BnaA09g24470D
BnaC05G0282700ZS	BnaC05g24390D
BnaA05G0325700ZS	BnaA05g36500D
BnaC05G0342200ZS	BnaC05g28830D
BnaA05G0324400ZS	BnaA05g35800D
BnaC05G0339500ZS	BnaC05g28630D
BnaA01G0184000ZS	BnaA01g35370D
BnaC01G0234800ZS	BnaC01g19980D
BnaA08G0073600ZS	BnaA08g30040D
BnaC08G0104100ZS	BnaC08g07490D
BnaA05G0320400ZS	BnaC05g28280D
BnaA05G0318600ZS	BnaA05g20720D
BnaC05G0333100ZS	BnaC05g28210D
BnaC05G0330500ZS	BnaC05g27990D
BnaC06G0100400ZS	BnaC06g08180D
BnaA08G0069100ZS	BnaA08g06430D
BnaC08G0096900ZS	BnaC08g06960D
BnaA10G0114200ZS	BnaA10g09600D
BnaC09G0380200ZS	BnaC09g31940D
BnaA09G0377000ZS	BnaAnng02240D
BnaC06G0099600ZS	BnaC06g08280D
BnaA08G0068500ZS	BnaA08g06380D
BnaA09G0376900ZS	BnaAnng02230D
BnaC08G0096200ZS	BnaC08g06880D
BnaA09G0375600ZS	BnaAnng02100D
BnaC06G0098600ZS	BnaC06g08390D
BnaA05G0315300ZS	BnaA05g18250D
BnaA08G0068000ZS	BnaA08g06290D
BnaC08G0095400ZS	BnaC08g06800D
BnaA09G0374300ZS	BnaCnng37600D
BnaC05G0328600ZS	BnaCnng62790D
BnaA05G0313200ZS	BnaAnng04520D
BnaC05G0326000ZS	BnaC05g27530D
BnaA06G0043200ZS	BnaA06g04070D
BnaC06G0025000ZS	BnaC06g01580D
BnaA08G0066900ZS	BnaA08g06180D
BnaA02G0277400ZS	BnaA02g23000D
BnaA09G0185800ZS	BnaA09g16170D
BnaC02G0376400ZS	BnaC02g29720D
BnaC07G0253700ZS	BnaC07g19610D
BnaC06G0007700ZS	BnaA10g09020D
BnaA10G0068800ZS	BnaA10g28120D
BnaA08G0058400ZS	BnaA08g04700D
BnaA09G0180400ZS	BnaA09g15450D
BnaA05G0190900ZS	BnaAnng06510D
BnaC05G0320700ZS	BnaC05g51500D
BnaC09G0205200ZS	BnaC09g51700D
BnaA10G0068300ZS	BnaA10g08930D
BnaA10G0063500ZS	BnaC06g00930D
BnaA10G0061100ZS	BnaA10g28550D
BnaC06G0014700ZS	BnaAnng36690D
BnaC04G0133000ZS	BnaCnng05360D
BnaA05G0185500ZS	BnaA05g17590D
BnaC05G0315600ZS	BnaCnng32320D
BnaA05G0185200ZS	BnaAnng40060D
BnaC07G0028300ZS	BnaC07g02130D
BnaC07G0160400ZS	BnaC07g10720D
BnaA07G0039400ZS	BnaCnng15500D
BnaA05G0184500ZS	BnaA05g17510D
BnaA06G0041800ZS	BnaA06g03910D
BnaC06G0027800ZS	BnaC06g01880D
BnaA08G0039500ZS	BnaA08g03400D
BnaC08G0049200ZS	BnaC08g46660D
BnaA08G0038700ZS	BnaA08g03320D
BnaC08G0048300ZS	BnaC08g03600D
BnaC09G0361700ZS	BnaC09g30310D
BnaA08G0036500ZS	BnaA08g03050D
BnaA05G0183300ZS	BnaAnng26930D
BnaC05G0311800ZS	BnaC05g25790D
BnaC08G0044300ZS	BnaC08g03340D
BnaA08G0036200ZS	BnaA08g02980D
BnaC08G0043900ZS	BnaC08g03290D
BnaA05G0183000ZS	BnaA05g36390D
BnaC05G0311300ZS	BnaC05g25830D
BnaA03G0466500ZS	BnaA03g45360D
BnaC06G0036500ZS	BnaCnng16480D
BnaA06G0036300ZS	BnaA06g03190D
BnaC06G0038400ZS	BnaC06g02550D
BnaA08G0033400ZS	BnaA08g02780D
BnaA05G0370100ZS	BnaA05g21220D
BnaC05G0408600ZS	BnaC05g34140D
BnaC08G0038200ZS	BnaCnng43540D
BnaA05G0180800ZS	BnaA05g16120D
BnaC05G0305400ZS	BnaC05g51640D
BnaA06G0034200ZS	BnaA06g37530D
BnaC06G0041800ZS	BnaC06g02800D
BnaA05G0179700ZS	BnaA05g16020D
BnaA06G0035400ZS	BnaA06g03090D
BnaC06G0039900ZS	BnaCnng26150D
BnaC05G0304100ZS	BnaCnng66260D
BnaA06G0033700ZS	BnaA06g37600D
BnaA08G0029200ZS	BnaA08g02340D
BnaC03G0779800ZS	BnaC03g68350D
BnaA06G0032500ZS	BnaA06g37720D
BnaC06G0043900ZS	BnaC06g03160D
BnaA08G0027400ZS	BnaA08g02240D
BnaA06G0032300ZS	BnaAnng23150D
BnaC06G0044900ZS	BnaAnng31920D
BnaC03G0781300ZS	BnaC03g68490D
BnaA05G0178000ZS	BnaA05g15920D
BnaA06G0031300ZS	BnaA06g02890D
BnaC06G0046900ZS	BnaC06g03490D
BnaC05G0300500ZS	BnaCnng25770D
BnaC03G0783100ZS	BnaC03g68700D
BnaA06G0025100ZS	BnaA06g02470D
BnaC06G0054700ZS	BnaC06g04410D
BnaC06G0054800ZS	BnaA05g15470D
BnaC05G0292600ZS	BnaC05g27100D
BnaA05G0173700ZS	BnaA05g15450D
BnaA08G0020900ZS	BnaA08g01860D
BnaC03G0787700ZS	BnaC03g77890D
BnaA05G0171500ZS	BnaA05g15300D
BnaA05G0170700ZS	BnaA05g15360D
BnaA06G0021900ZS	BnaA06g02080D
BnaC06G0059900ZS	BnaC06g09030D
BnaC06G0120300ZS	BnaC06g09630D
BnaA05G0167300ZS	BnaA05g14880D
BnaC06G0121000ZS	BnaC06g09680D
BnaA05G0164800ZS	BnaA05g35640D
BnaC06G0124400ZS	BnaC06g41770D
BnaA05G0164000ZS	BnaA05g14700D
BnaC06G0126000ZS	BnaC06g10100D
BnaA05G0163700ZS	BnaA05g14670D
BnaA06G0013800ZS	BnaA06g01110D
BnaC06G0126300ZS	BnaC06g10070D
BnaC06G0075400ZS	BnaC06g41420D
BnaA05G0161800ZS	BnaA05g14530D
BnaC06G0129900ZS	BnaC06g06370D
BnaA08G0011800ZS	BnaA08g29190D
BnaA08G0011900ZS	BnaA08g29170D
BnaC06G0082900ZS	BnaC06g06810D
BnaC06G0082500ZS	BnaC06g06760D
BnaA05G0156500ZS	BnaA05g14030D
BnaC06G0135800ZS	BnaC06g10480D
BnaA05G0156400ZS	BnaA05g14020D
BnaC06G0135900ZS	BnaC06g10490D
BnaA05G0155900ZS	BnaA05g13980D
BnaA08G0009000ZS	BnaA08g00740D
BnaC03G0806100ZS	BnaC03g70110D
BnaC06G0137500ZS	BnaC06g10670D
BnaA09G0183500ZS	BnaA09g15850D
BnaC09G0208600ZS	BnaC09g16350D
BnaA09G0183100ZS	BnaC09g16320D
BnaA03G0579800ZS	BnaAnng12970D
BnaC04G0218500ZS	BnaC04g18090D
BnaA09G0182300ZS	BnaA09g15610D
BnaC09G0206500ZS	BnaC09g16220D
BnaA09G0181700ZS	BnaA09g15570D
BnaC09G0206000ZS	BnaC09g51570D
BnaA06G0005500ZS	BnaA06g00440D
BnaC03G0809300ZS	BnaA08g00590D
BnaC06G0086300ZS	BnaC06g41560D
BnaA05G0154600ZS	BnaA05g13810D
BnaA06G0005000ZS	BnaA06g00390D
BnaC06G0087000ZS	BnaC06g07220D
BnaC06G0139500ZS	BnaC06g10880D
BnaA06G0004700ZS	BnaA06g00360D
BnaC06G0087500ZS	BnaC06g07270D
BnaC06G0141100ZS	BnaC06g11020D
BnaA08G0003300ZS	BnaA08g00340D
BnaC03G0813600ZS	BnaC03g70760D
BnaA08G0002100ZS	BnaA08g00200D
BnaC03G0815900ZS	BnaC03g70910D
BnaA09G0028000ZS	BnaA09g01040D
BnaC09G0012700ZS	BnaC09g00190D
BnaC03G0814000ZS	BnaC03g70780D
BnaA09G0178700ZS	BnaA09g15250D
BnaC09G0202200ZS	BnaC09g15880D
BnaA09G0575900ZS	BnaA09g41060D
BnaC08G0427300ZS	BnaC08g49130D
BnaC01G0324400ZS	BnaC01g27810D
BnaA03G0570800ZS	BnaA03g59400D
BnaC04G0225100ZS	BnaC04g18440D
BnaA09G0173800ZS	BnaA09g14700D
BnaC09G0195300ZS	BnaCnng25620D
BnaA09G0181500ZS	BnaA09g15550D
BnaA06G0066400ZS	BnaA06g06210D
BnaC05G0082000ZS	BnaC05g07950D
BnaA01G0269400ZS	BnaA01g22090D
BnaC04G0229200ZS	BnaAnng31090D
BnaC01G0329900ZS	BnaC01g43200D
BnaC04G0229100ZS	BnaCnng44370D
BnaA01G0271100ZS	BnaA01g22230D
BnaC01G0331500ZS	BnaC01g43100D
BnaA01G0271700ZS	BnaA01g22310D
BnaC01G0332200ZS	BnaC01g43180D
BnaA01G0276500ZS	BnaA01g36030D
BnaA03G0578100ZS	BnaAnng19670D
BnaC01G0338400ZS	BnaC01g28940D
BnaC04G0232600ZS	BnaCnng37740D
BnaA09G0162000ZS	BnaA09g13880D
BnaC09G0179800ZS	BnaCnng10130D
BnaA09G0654100ZS	BnaA09g48000D
BnaA01G0279900ZS	BnaA01g22680D
BnaC01G0342700ZS	BnaC01g29530D
BnaA01G0280700ZS	BnaA01g22770D
BnaC01G0344100ZS	BnaC01g43380D
BnaA01G0282200ZS	BnaA01g36200D
BnaA03G0584100ZS	BnaA03g60670D
BnaC01G0345900ZS	BnaC01g29820D
BnaC04G0237700ZS	BnaC04g18950D
BnaA01G0282700ZS	BnaA01g36260D
BnaA03G0584500ZS	BnaA03g60690D
BnaC01G0346500ZS	BnaC01g29890D
BnaC04G0238000ZS	BnaC04g19000D
BnaC09G0175700ZS	BnaC04g19040D
BnaC09G0175500ZS	BnaC09g13970D
BnaC04G0242400ZS	BnaC04g19550D
BnaC04G0242600ZS	BnaA09g13310D
BnaC09G0172400ZS	BnaC09g13580D
BnaA09G0155700ZS	BnaA09g13230D
BnaC09G0170800ZS	BnaCnng68070D
BnaA03G0591100ZS	BnaA03g54590D
BnaC04G0246800ZS	BnaA09g10600D
BnaA09G0128700ZS	BnaA09g10620D
BnaC09G0136700ZS	BnaC09g10910D
BnaA09G0153900ZS	BnaA09g12770D
BnaC09G0168400ZS	BnaC09g13110D
BnaA09G0153100ZS	BnaA09g12710D
BnaC09G0167500ZS	BnaC09g13030D
BnaA09G0152900ZS	BnaA09g12680D
BnaC09G0167200ZS	BnaC09g13010D
BnaA09G0129300ZS	BnaA09g10680D
BnaC09G0137200ZS	BnaC09g10950D
BnaA09G0151800ZS	BnaA09g12940D
BnaC03G0464300ZS	BnaC03g74130D
BnaC09G0165000ZS	BnaCnng41640D
BnaA09G0131500ZS	BnaA09g10830D
BnaC04G0250400ZS	BnaC04g20240D
BnaC09G0139400ZS	BnaCnng14850D
BnaA09G0131700ZS	BnaA09g10850D
BnaC09G0139600ZS	BnaCnng14830D
BnaC04G0438300ZS	BnaC04g34950D
BnaC08G0507300ZS	BnaC08g41440D
BnaA09G0134600ZS	BnaA09g11110D
BnaC09G0143200ZS	BnaC09g11420D
BnaA09G0148400ZS	BnaA09g12350D
BnaA09G0136700ZS	BnaA09g11370D
BnaC09G0146600ZS	BnaC09g11810D
BnaA09G0145900ZS	BnaA09g11920D
BnaC09G0158100ZS	BnaC09g12480D
BnaA09G0137900ZS	BnaA09g11520D
BnaC09G0147800ZS	BnaC09g11970D
BnaA09G0139100ZS	BnaA09g11600D
BnaC09G0148700ZS	BnaC09g11100D
BnaA09G0142100ZS	BnaA09g12160D
BnaC09G0153300ZS	BnaC09g12120D
BnaA09G0121600ZS	BnaA09g09850D
BnaC09G0127400ZS	BnaC09g09890D
BnaA02G0154400ZS	BnaA02g11850D
BnaA07G0281500ZS	BnaA07g25180D
BnaC02G0197600ZS	BnaC02g16290D
BnaC06G0322500ZS	BnaC06g26940D
BnaA07G0281800ZS	BnaA07g25210D
BnaC06G0322800ZS	BnaC06g26980D
BnaA07G0281900ZS	BnaA07g25220D
BnaC06G0322900ZS	BnaC06g26990D
BnaA07G0282400ZS	BnaA07g25270D
BnaC02G0200400ZS	BnaC02g45240D
BnaC06G0323500ZS	BnaC06g27050D
BnaA02G0156900ZS	BnaA02g12130D
BnaC02G0200600ZS	BnaC02g45250D
BnaA02G0157100ZS	BnaA02g12140D
BnaA09G0046800ZS	BnaA09g02820D
BnaC02G0200800ZS	BnaC02g45280D
BnaC09G0032500ZS	BnaCnng54360D
BnaA07G0283900ZS	BnaA07g25490D
BnaC06G0325500ZS	BnaC06g27280D
BnaA07G0287100ZS	BnaA07g25810D
BnaC06G0329200ZS	BnaC06g43540D
BnaA07G0287400ZS	BnaA07g25850D
BnaC06G0329500ZS	BnaC06g43510D
BnaA07G0288800ZS	BnaC06g27700D
BnaA02G0165600ZS	BnaA02g13060D
BnaA07G0280600ZS	BnaA07g25090D
BnaC02G0212200ZS	BnaC02g45630D
BnaA07G0292900ZS	BnaA07g26390D
BnaC06G0336700ZS	BnaC06g28500D
BnaA02G0168300ZS	BnaA02g13310D
BnaA07G0295500ZS	BnaA07g26670D
BnaC02G0215900ZS	BnaC02g17470D
BnaC06G0341300ZS	BnaC06g28830D
BnaA02G0169000ZS	BnaA02g13370D
BnaC02G0217200ZS	BnaC02g17580D
BnaA07G0296500ZS	BnaAnng14080D
BnaC06G0343200ZS	BnaC06g29110D
BnaA02G0170700ZS	BnaA02g13560D
BnaC02G0219500ZS	BnaC02g45910D
BnaA02G0171000ZS	BnaA02g13590D
BnaA07G0298600ZS	BnaA07g26840D
BnaC02G0219600ZS	BnaC02g17750D
BnaC06G0344600ZS	BnaC06g29240D
BnaA02G0174200ZS	BnaA02g13870D
BnaA07G0301700ZS	BnaA07g27150D
BnaC02G0224900ZS	BnaC02g18270D
BnaC06G0349500ZS	BnaC06g30050D
BnaA07G0275100ZS	BnaA07g24600D
BnaA07G0303400ZS	BnaA07g27320D
BnaC06G0352200ZS	BnaC06g30310D
BnaA07G0303900ZS	BnaA07g27370D
BnaC03G0506800ZS	BnaC06g02910D
BnaC06G0352600ZS	BnaC06g30350D
BnaA07G0304300ZS	BnaA07g27400D
BnaC06G0352900ZS	BnaC06g29530D
BnaA07G0272700ZS	BnaA07g24390D
BnaA07G0306200ZS	BnaA07g27630D
BnaC06G0355700ZS	BnaC06g29900D
BnaA02G0178600ZS	BnaA02g14220D
BnaA07G0306300ZS	BnaA07g27640D
BnaC02G0232300ZS	BnaC02g18880D
BnaC06G0355800ZS	BnaC06g29910D
BnaA02G0179200ZS	BnaA02g35830D
BnaC06G0356800ZS	BnaA07g27740D
BnaC01G0232300ZS	BnaC01g21410D
BnaC03G0615300ZS	BnaC03g56290D
BnaA07G0271500ZS	BnaA07g24270D
BnaA07G0309700ZS	BnaA07g28000D
BnaC06G0359500ZS	BnaC06g30680D
BnaC06G0307300ZS	BnaC06g43410D
BnaA07G0309800ZS	BnaA07g28010D
BnaC06G0359600ZS	BnaC06g30690D
BnaA07G0310700ZS	BnaA07g28120D
BnaC06G0360900ZS	BnaC06g28080D
BnaC06G0306600ZS	BnaC06g43390D
BnaA02G0183900ZS	BnaA02g14550D
BnaA07G0269800ZS	BnaA07g24100D
BnaA07G0312600ZS	BnaA07g28310D
BnaC06G0304500ZS	BnaC06g25160D
BnaC06G0363500ZS	BnaC06g30800D
BnaC02G0242700ZS	BnaCnng70120D
BnaA10G0262100ZS	BnaA10g23860D
BnaA02G0025600ZS	BnaAnng13700D
BnaC02G0027700ZS	BnaC02g01630D
BnaC09G0576300ZS	BnaC09g48600D
BnaA07G0315100ZS	BnaA07g28540D
BnaC06G0366500ZS	BnaC06g31150D
BnaC06G0367000ZS	BnaC06g31190D
BnaA07G0316200ZS	BnaA07g28670D
BnaC06G0367500ZS	BnaC06g31250D
BnaA07G0268200ZS	BnaA07g23960D
BnaA07G0316600ZS	BnaA07g28710D
BnaC06G0302200ZS	BnaC06g24850D
BnaC06G0367900ZS	BnaC06g31300D
BnaA04G0277200ZS	BnaA04g25210D
BnaC04G0594900ZS	BnaC04g49080D
BnaA07G0319100ZS	BnaA08g05380D
BnaC06G0371500ZS	BnaC06g31680D
BnaC06G0372400ZS	BnaC06g43720D
BnaA07G0320400ZS	BnaA07g28790D
BnaC06G0373300ZS	BnaC06g31770D
BnaC02G0417200ZS	BnaC02g46940D
BnaA02G0193200ZS	BnaA02g35570D
BnaA07G0265100ZS	BnaA07g23630D
BnaC02G0257000ZS	BnaC02g20600D
BnaC06G0296800ZS	BnaCnng17080D
BnaA07G0264700ZS	BnaA07g23600D
BnaC06G0296500ZS	BnaCnng17040D
BnaA07G0324800ZS	BnaA07g29240D
BnaC06G0380000ZS	BnaC06g32400D
BnaA07G0325200ZS	BnaA07g29290D
BnaC06G0380600ZS	BnaC06g32460D
BnaA07G0325900ZS	BnaA07g29350D
BnaC06G0381500ZS	BnaC06g32550D
BnaA07G0263300ZS	BnaA07g23460D
BnaC06G0382500ZS	BnaA07g29440D
BnaC06G0294400ZS	BnaCnng07890D
BnaC06G0294300ZS	BnaA02g15390D
BnaC02G0257700ZS	BnaC02g20640D
BnaC06G0382600ZS	BnaC06g32640D
BnaA07G0327600ZS	BnaA07g29530D
BnaC06G0383400ZS	BnaC06g32720D
BnaA07G0327800ZS	BnaA07g29550D
BnaC02G0259500ZS	BnaC02g20760D
BnaA07G0328000ZS	BnaA07g29570D
BnaC06G0383900ZS	BnaC06g32760D
BnaA02G0195000ZS	BnaA02g15530D
BnaA07G0262400ZS	BnaA07g23410D
BnaC02G0259600ZS	BnaC02g20770D
BnaC06G0293400ZS	BnaCnng07840D
BnaA07G0262200ZS	BnaA07g29610D
BnaC06G0384400ZS	BnaC06g32810D
BnaA07G0261400ZS	BnaA07g23290D
BnaC06G0292000ZS	BnaCnng07680D
BnaA02G0197500ZS	BnaA02g15790D
BnaA07G0332700ZS	BnaA07g30150D
BnaC06G0390500ZS	BnaC06g33590D
BnaC03G0184000ZS	BnaC03g18220D
BnaA07G0333100ZS	BnaA07g30190D
BnaC06G0391200ZS	BnaC06g33630D
BnaA09G0259500ZS	BnaA09g22700D
BnaC06G0288200ZS	BnaC06g24070D
BnaA07G0335300ZS	BnaA07g30430D
BnaC06G0393700ZS	BnaC06g33910D
BnaA02G0203800ZS	BnaA02g16200D
BnaA07G0257600ZS	BnaA07g22900D
BnaC02G0271000ZS	BnaC02g21680D
BnaC06G0286700ZS	BnaC06g23880D
BnaA07G0337700ZS	BnaA07g30700D
BnaC06G0396800ZS	BnaC06g34160D
BnaC06G0398200ZS	BnaC06g34370D
BnaA07G0339200ZS	BnaA07g30930D
BnaA07G0255300ZS	BnaA07g22630D
BnaC06G0398900ZS	BnaC06g23540D
BnaC06G0399000ZS	BnaA02g16500D
BnaA07G0339500ZS	BnaA07g30960D
BnaC06G0283000ZS	BnaC06g23520D
BnaC06G0399100ZS	BnaC06g34400D
BnaA07G0339700ZS	BnaA07g30970D
BnaC06G0399500ZS	BnaC06g34420D
BnaA07G0254500ZS	BnaA07g22570D
BnaA07G0340200ZS	BnaA07g38980D
BnaC06G0282500ZS	BnaC06g23490D
BnaC06G0400100ZS	BnaC06g34480D
BnaA06G0126300ZS	BnaA06g12550D
BnaC05G0154500ZS	BnaC05g14110D
BnaA02G0211400ZS	BnaA02g35910D
BnaA07G0251600ZS	BnaA07g22220D
BnaC02G0282300ZS	BnaC02g22890D
BnaC06G0277400ZS	BnaC06g22960D
BnaA07G0250900ZS	BnaA07g22160D
BnaC06G0277000ZS	BnaC06g22910D
BnaA07G0250600ZS	BnaA07g22120D
BnaA07G0347300ZS	BnaA07g31690D
BnaC06G0276500ZS	BnaC06g22850D
BnaC06G0409500ZS	BnaC06g35530D
BnaA02G0213600ZS	BnaA02g17050D
BnaA07G0249000ZS	BnaA07g21940D
BnaC01G0270800ZS	BnaC01g26460D
BnaC06G0274700ZS	BnaC06g22680D
BnaA05G0030300ZS	BnaA05g02780D
BnaC04G0033000ZS	BnaC04g02660D
BnaA02G0216100ZS	BnaA02g17280D
BnaA07G0352900ZS	BnaA07g21650D
BnaC02G0288400ZS	BnaC02g24360D
BnaC06G0271100ZS	BnaC06g22330D
BnaC06G0416100ZS	BnaC06g43960D
BnaA07G0355500ZS	BnaA07g32120D
BnaC06G0418500ZS	BnaC06g36500D
BnaA07G0356100ZS	BnaA07g32210D
BnaC06G0419200ZS	BnaC06g36580D
BnaA07G0244900ZS	BnaA07g21530D
BnaA07G0356200ZS	BnaA07g32220D
BnaC06G0268600ZS	BnaC06g22050D
BnaC06G0419300ZS	BnaC06g36590D
BnaA07G0356700ZS	BnaA07g32270D
BnaC06G0420000ZS	BnaC06g36660D
BnaA07G0357400ZS	BnaA07g32280D
BnaC06G0420600ZS	BnaC06g36720D
BnaC02G0294100ZS	BnaCnng41200D
BnaA07G0358300ZS	BnaA07g32390D
BnaC06G0421600ZS	BnaC06g36850D
BnaA02G0221500ZS	BnaA02g18100D
BnaA07G0360800ZS	BnaA07g32710D
BnaC02G0298000ZS	BnaC02g24050D
BnaC06G0424300ZS	BnaC06g37170D
BnaA07G0242300ZS	BnaA07g21280D
BnaC06G0265300ZS	BnaC06g21660D
BnaC06G0428500ZS	BnaC06g37640D
BnaC02G0301700ZS	BnaCnng46430D
BnaA02G0224100ZS	BnaA02g17810D
BnaA07G0241100ZS	BnaA07g21150D
BnaC06G0263600ZS	BnaC06g18680D
BnaA07G0365600ZS	BnaA07g33190D
BnaC06G0430200ZS	BnaC06g37750D
BnaA07G0367000ZS	BnaA07g33370D
BnaC06G0431500ZS	BnaC06g37910D
BnaA07G0367800ZS	BnaA07g33460D
BnaC06G0432200ZS	BnaC06g38010D
BnaA07G0368600ZS	BnaA07g33530D
BnaC06G0433000ZS	BnaC06g38120D
BnaA02G0226400ZS	BnaA02g18380D
BnaC02G0305200ZS	BnaA07g20970D
BnaC06G0261200ZS	BnaC06g20970D
BnaA07G0238900ZS	BnaA07g20920D
BnaC06G0260700ZS	BnaC06g20910D
BnaA07G0370600ZS	BnaA07g33760D
BnaC06G0435500ZS	BnaC06g38380D
BnaA07G0371300ZS	BnaA07g33840D
BnaC06G0436500ZS	BnaC06g38460D
BnaA02G0229400ZS	BnaA02g18700D
BnaC02G0309200ZS	BnaC02g24720D
BnaA07G0371800ZS	BnaA07g33890D
BnaC06G0437000ZS	BnaC06g38520D
BnaA02G0232600ZS	BnaA02g18970D
BnaA07G0376800ZS	BnaA07g34280D
BnaC02G0313200ZS	BnaC02g25080D
BnaA02G0233000ZS	BnaA02g19010D
BnaA07G0380800ZS	BnaC06g39550D
BnaA07G0381000ZS	BnaA07g34710D
BnaC06G0448000ZS	BnaC06g39580D
BnaA07G0381700ZS	BnaA07g34790D
BnaC02G0318500ZS	BnaC02g25760D
BnaA07G0231100ZS	BnaA07g20350D
BnaA02G0237500ZS	BnaA07g34920D
BnaC06G0249500ZS	BnaC06g19840D
BnaC06G0450000ZS	BnaC06g39850D
BnaA07G0230900ZS	BnaA07g20330D
BnaA07G0230400ZS	BnaA07g20280D
BnaC06G0248700ZS	BnaC06g19760D
BnaA07G0384400ZS	BnaA07g35130D
BnaC06G0452100ZS	BnaC06g40040D
BnaA07G0245100ZS	BnaA07g21550D
BnaC06G0268800ZS	BnaC06g22080D
BnaA07G0223600ZS	BnaA07g19690D
BnaC06G0240800ZS	BnaC06g18950D
BnaA07G0223700ZS	BnaA07g19700D
BnaC06G0240900ZS	BnaC06g18960D
BnaA06G0001200ZS	BnaA06g00080D
BnaC09G0204100ZS	BnaC09g16070D
BnaA05G0069000ZS	BnaA05g06270D
BnaC04G0078000ZS	BnaC04g06500D
BnaA07G0225000ZS	BnaA07g38280D
BnaC06G0242100ZS	BnaC06g43070D
BnaA07G0389900ZS	BnaA07g35730D
BnaC06G0458100ZS	BnaC06g40650D
BnaA02G0243800ZS	BnaA02g19750D
BnaA07G0226400ZS	BnaA07g19860D
BnaA07G0390100ZS	BnaA07g35650D
BnaC02G0327100ZS	BnaC02g23120D
BnaC06G0243700ZS	BnaC06g19160D
BnaC06G0457400ZS	BnaC06g40590D
BnaA02G0241700ZS	BnaA02g36300D
BnaC02G0324900ZS	BnaC02g46570D
BnaA02G0241400ZS	BnaA02g19550D
BnaA02G0240800ZS	BnaA02g19470D
BnaA07G0227600ZS	BnaA07g19990D
BnaC02G0324200ZS	BnaC02g46530D
BnaC06G0245400ZS	BnaC06g19420D
BnaA07G0229400ZS	BnaA07g20190D
BnaA07G0384700ZS	BnaA07g35160D
BnaC06G0247400ZS	BnaC06g19640D
BnaC06G0452400ZS	BnaC06g40070D
BnaA02G0311500ZS	BnaA02g27200D
BnaA06G0413000ZS	BnaA06g35170D
BnaC02G0421700ZS	BnaC02g33540D
BnaC07G0263700ZS	BnaC07g20590D
BnaA02G0311900ZS	BnaA02g27160D
BnaA09G0216100ZS	BnaA09g18470D
BnaC09G0250800ZS	BnaC09g20400D
BnaC07G0264500ZS	BnaC07g48730D
BnaA02G0312200ZS	BnaA02g36840D
BnaA06G0412400ZS	BnaA06g35120D
BnaA09G0216200ZS	BnaA09g18490D
BnaC02G0423000ZS	BnaC02g33670D
BnaC07G0264800ZS	BnaC07g48760D
BnaC09G0251000ZS	BnaC09g20430D
BnaA06G0412100ZS	BnaA06g35080D
BnaC07G0265200ZS	BnaC07g20610D
BnaA06G0412000ZS	BnaA06g35070D
BnaC07G0265300ZS	BnaC07g20620D
BnaA05G0003900ZS	BnaA05g00410D
BnaC04G0086800ZS	BnaC04g07470D
BnaA02G0313600ZS	BnaA02g27010D
BnaA06G0411500ZS	BnaA06g35020D
BnaC02G0424600ZS	BnaC02g33880D
BnaC07G0265900ZS	BnaC07g20680D
BnaA06G0346900ZS	BnaA06g28500D
BnaA06G0411000ZS	BnaA06g34970D
BnaC07G0266200ZS	BnaC07g20710D
BnaA07G0339400ZS	BnaA07g30950D
BnaC02G0277900ZS	BnaC02g22310D
BnaA02G0314300ZS	BnaA02g26940D
BnaC02G0425700ZS	BnaC02g47640D
BnaA09G0629800ZS	BnaA09g45340D
BnaC08G0487400ZS	BnaC08g39150D
BnaA09G0218400ZS	BnaA09g18700D
BnaC09G0254100ZS	BnaC09g52270D
BnaC07G0270100ZS	BnaA06g34760D
BnaC07G0270200ZS	BnaC07g20980D
BnaA02G0317400ZS	BnaA02g25890D
BnaC02G0429200ZS	BnaC02g47740D
BnaA06G0406900ZS	BnaA06g34570D
BnaC07G0271600ZS	BnaC07g21090D
BnaA02G0317600ZS	BnaA02g25920D
BnaA06G0407200ZS	BnaA06g34610D
BnaC02G0429500ZS	BnaC02g47710D
BnaA06G0405800ZS	BnaA06g34480D
BnaC07G0273800ZS	BnaC07g21280D
BnaC05G0215500ZS	BnaC05g19780D
BnaC05G0217900ZS	BnaCnng54700D
BnaA06G0403900ZS	BnaA06g34300D
BnaC07G0276300ZS	BnaC07g21550D
BnaA02G0322100ZS	BnaA02g26310D
BnaC02G0434200ZS	BnaC02g47870D
BnaA06G0401100ZS	BnaA06g33970D
BnaC07G0280400ZS	BnaC07g21970D
BnaA09G0685200ZS	BnaA09g50700D
BnaC04G0375000ZS	BnaC08g43710D
BnaA06G0400500ZS	BnaA06g33910D
BnaC07G0281300ZS	BnaC07g22030D
BnaA06G0400200ZS	BnaA06g33880D
BnaC07G0281500ZS	BnaC07g22050D
BnaA06G0400100ZS	BnaA06g33870D
BnaA09G0222900ZS	BnaA09g53680D
BnaC07G0281600ZS	BnaC07g22060D
BnaC09G0259500ZS	BnaC09g21150D
BnaA06G0400000ZS	BnaA06g33860D
BnaC07G0281700ZS	BnaC07g22070D
BnaA09G0223100ZS	BnaA09g53660D
BnaC09G0259800ZS	BnaC09g21180D
BnaC09G0260000ZS	BnaC09g21210D
BnaA02G0326200ZS	BnaA09g53640D
BnaA06G0396500ZS	BnaA06g39930D
BnaC02G0442300ZS	BnaAnng39110D
BnaC07G0284400ZS	BnaC07g22390D
BnaA06G0397700ZS	BnaA06g39830D
BnaA09G0225500ZS	BnaA09g19400D
BnaA02G0328200ZS	BnaAnng29760D
BnaC02G0443300ZS	BnaC02g35090D
BnaC07G0285100ZS	BnaC07g22460D
BnaC09G0263200ZS	BnaC09g22080D
BnaA09G0225800ZS	BnaA09g19420D
BnaC09G0263400ZS	BnaC09g22090D
BnaC02G0443700ZS	BnaC02g35130D
BnaA02G0329100ZS	BnaC02g35150D
BnaC09G0264200ZS	BnaC09g22150D
BnaA06G0398300ZS	BnaA06g39760D
BnaC07G0285700ZS	BnaC07g22530D
BnaA06G0395900ZS	BnaA06g33630D
BnaC02G0444400ZS	BnaC02g35270D
BnaC07G0287500ZS	BnaC07g22640D
BnaA02G0329800ZS	BnaA02g27390D
BnaA02G0330100ZS	BnaAnng22000D
BnaA07G0057800ZS	BnaA07g04490D
BnaC07G0087200ZS	BnaCnng00860D
BnaA03G0385600ZS	BnaA03g37780D
BnaC03G0476900ZS	BnaC03g44180D
BnaA09G0127300ZS	BnaA09g10420D
BnaC09G0134200ZS	BnaC09g10620D
BnaA03G0386100ZS	BnaA03g37870D
BnaC03G0478600ZS	BnaC03g44930D
BnaA03G0386200ZS	BnaA03g37880D
BnaC03G0478700ZS	BnaC03g44940D
BnaA03G0388300ZS	BnaA03g38100D
BnaA06G0074800ZS	BnaA06g07200D
BnaA07G0056400ZS	BnaAnng14360D
BnaC07G0083300ZS	BnaC07g04160D
BnaA03G0389600ZS	BnaA03g38220D
BnaC03G0482300ZS	BnaC03g45040D
BnaC07G0081400ZS	BnaC07g04330D
BnaA07G0055300ZS	BnaA07g04350D
BnaC07G0081000ZS	BnaC07g48140D
BnaA07G0054800ZS	BnaA07g04340D
BnaC07G0080600ZS	BnaC07g04350D
BnaA03G0389500ZS	BnaA03g38210D
BnaC03G0482200ZS	BnaC03g45030D
BnaA07G0054600ZS	BnaA07g04320D
BnaC07G0080200ZS	BnaCnng68330D
BnaA03G0389400ZS	BnaA03g38200D
BnaC03G0482100ZS	BnaC03g45020D
BnaA07G0054300ZS	BnaA07g04290D
BnaC07G0079900ZS	BnaC07g47810D
BnaA05G0440200ZS	BnaA05g28820D
BnaC05G0501900ZS	BnaC05g43300D
BnaA09G0102900ZS	BnaA09g08190D
BnaC09G0103500ZS	BnaC09g08390D
BnaA01G0289400ZS	BnaAnng40940D
BnaC01G0355200ZS	BnaCnng29890D
BnaA09G0104200ZS	BnaA09g08310D
BnaC09G0105000ZS	BnaUnng02290D
BnaA07G0048600ZS	BnaA08g29750D
BnaC07G0077700ZS	BnaC07g04420D
BnaA07G0047900ZS	BnaAnng09800D
BnaC07G0077400ZS	BnaC07g04440D
BnaA03G0392100ZS	BnaA03g38500D
BnaC03G0485200ZS	BnaC03g45300D
BnaA08G0040600ZS	BnaAnng16660D
BnaC08G0050000ZS	BnaC08g03770D
BnaA03G0393100ZS	BnaA03g38620D
BnaC03G0486700ZS	BnaC03g45460D
BnaA07G0046700ZS	BnaAnng10260D
BnaC07G0076900ZS	BnaC07g04480D
BnaA03G0393400ZS	BnaA03g38660D
BnaA09G0105000ZS	BnaA09g08400D
BnaC09G0106100ZS	BnaC09g08700D
BnaC03G0487100ZS	BnaCnng47180D
BnaA03G0393500ZS	BnaA03g38670D
BnaA09G0105100ZS	BnaA09g08410D
BnaC09G0106200ZS	BnaC09g08710D
BnaC03G0487200ZS	BnaCnng47170D
BnaC03G0491800ZS	BnaA03g38910D
BnaA03G0396300ZS	BnaA03g38920D
BnaC03G0491900ZS	BnaC03g45960D
BnaA09G0108500ZS	BnaA09g08660D
BnaC09G0109900ZS	BnaC09g08890D
BnaC07G0065500ZS	BnaC07g05570D
BnaC03G0495900ZS	BnaC03g46440D
BnaA07G0365700ZS	BnaA07g33200D
BnaC06G0430300ZS	BnaC06g37760D
BnaA07G0036100ZS	BnaA07g03670D
BnaA09G0109400ZS	BnaA09g08790D
BnaC07G0063300ZS	BnaC07g05690D
BnaC09G0111400ZS	BnaC09g09070D
BnaA03G0401800ZS	BnaA03g39480D
BnaC03G0501500ZS	BnaC03g47420D
BnaA07G0030000ZS	BnaA07g02510D
BnaA09G0111000ZS	BnaA09g08990D
BnaC09G0113300ZS	BnaC09g09250D
BnaC07G0054900ZS	BnaCnng22750D
BnaA09G0112000ZS	BnaA09g09120D
BnaA07G0028200ZS	BnaA07g02640D
BnaC07G0052600ZS	BnaC07g06510D
BnaA09G0112500ZS	BnaA09g09170D
BnaC09G0114900ZS	BnaC09g09400D
BnaA06G0314000ZS	BnaA06g25450D
BnaA09G0115200ZS	BnaA09g09470D
BnaC09G0118400ZS	BnaCnng27230D
BnaA07G0022100ZS	BnaA07g01860D
BnaC07G0043300ZS	BnaC07g03690D
BnaA07G0021700ZS	BnaA07g01890D
BnaA09G0115600ZS	BnaA09g09500D
BnaC09G0119000ZS	BnaC09g09660D
BnaA06G0312800ZS	BnaA06g25330D
BnaC07G0041300ZS	BnaC07g03470D
BnaA06G0312000ZS	BnaA06g25260D
BnaC03G0511400ZS	BnaC03g48380D
BnaA09G0117500ZS	BnaA09g52820D
BnaC09G0121800ZS	BnaCnng52140D
BnaA07G0017800ZS	BnaA07g01830D
BnaA09G0118200ZS	BnaA09g09700D
BnaC07G0037300ZS	BnaC07g03160D
BnaC09G0122900ZS	BnaC09g51090D
BnaA03G0348000ZS	BnaA03g34390D
BnaA05G0387100ZS	BnaA05g22950D
BnaC03G0420100ZS	BnaC03g39830D
BnaC05G0432200ZS	BnaC05g36390D
BnaA07G0015600ZS	BnaA07g01230D
BnaA07G0015500ZS	BnaA07g01240D
BnaA07G0015400ZS	BnaA07g01250D
BnaC07G0032700ZS	BnaC07g02620D
BnaC07G0032800ZS	BnaC07g02630D
BnaA07G0015200ZS	BnaA07g01280D
BnaC07G0032400ZS	BnaC07g02590D
BnaC09G0124600ZS	BnaC09g51030D
BnaA09G0119400ZS	BnaA09g09830D
BnaC09G0124700ZS	BnaCnng44750D
BnaA05G0187800ZS	BnaA05g17780D
BnaC03G0512900ZS	BnaCnng30550D
BnaA06G0310200ZS	BnaCnng39320D
BnaC07G0026200ZS	BnaA07g36000D
BnaA09G0121200ZS	BnaAnng30990D
BnaC08G0462300ZS	BnaC08g36680D
BnaA09G0608600ZS	BnaA09g44120D
BnaA07G0010700ZS	BnaA07g01140D
BnaC02G0290200ZS	BnaC02g23660D
BnaC05G0179200ZS	BnaC05g50310D
BnaA07G0010000ZS	BnaA07g01090D
BnaA09G0122500ZS	BnaA09g09940D
BnaC07G0023000ZS	BnaC07g01540D
BnaC09G0128400ZS	BnaC09g09990D
BnaA07G0008900ZS	BnaA07g01000D
BnaA07G0006700ZS	BnaA07g00700D
BnaC07G0016900ZS	BnaC07g00040D
BnaA07G0005700ZS	BnaA07g00060D
BnaC07G0012500ZS	BnaC07g00780D
BnaA09G0126000ZS	BnaA09g10280D
BnaC09G0132400ZS	BnaC09g10440D
BnaA09G0126200ZS	BnaA09g10290D
BnaA03G0119400ZS	BnaA03g11220D
BnaC03G0138300ZS	BnaC03g14050D
BnaC07G0005300ZS	BnaAnng17640D
BnaA04G0136400ZS	BnaA04g11900D
BnaA09G0601800ZS	BnaA09g43450D
BnaA08G0220400ZS	BnaC03g57650D
BnaC04G0426700ZS	BnaC04g33800D
BnaA07G0099600ZS	BnaC07g11440D
BnaC02G0382700ZS	BnaCnng30150D
BnaA04G0137000ZS	BnaA04g11970D
BnaC04G0427400ZS	BnaC04g33730D
BnaA04G0137400ZS	BnaA04g12000D
BnaA09G0601100ZS	BnaA09g43380D
BnaC04G0427800ZS	BnaC04g33690D
BnaC08G0455100ZS	BnaC08g35990D
BnaA04G0138500ZS	BnaA04g12150D
BnaA09G0599100ZS	BnaA09g43210D
BnaC08G0452900ZS	BnaC08g35730D
BnaA04G0139100ZS	BnaA04g12210D
BnaA09G0598600ZS	BnaA09g43160D
BnaC04G0429600ZS	BnaC04g33460D
BnaC08G0452400ZS	BnaC08g35680D
BnaA04G0139200ZS	BnaA04g12220D
BnaC04G0429700ZS	BnaC04g33450D
BnaA03G0241300ZS	BnaA03g23100D
BnaA09G0597100ZS	BnaA09g42990D
BnaC08G0450600ZS	BnaC08g49320D
BnaA04G0140100ZS	BnaA04g12350D
BnaC08G0450300ZS	BnaC08g49360D
BnaA09G0596800ZS	BnaA09g42960D
BnaC08G0449600ZS	BnaC08g49230D
BnaA06G0428000ZS	BnaA08g16560D
BnaC03G0674900ZS	BnaC03g60540D
BnaA07G0381500ZS	BnaA07g34760D
BnaC06G0448500ZS	BnaC06g39650D
BnaA04G0141500ZS	BnaA04g12500D
BnaA09G0596100ZS	BnaA09g55940D
BnaC08G0448900ZS	BnaC08g35510D
BnaC04G0431900ZS	BnaCnng13880D
BnaA04G0143400ZS	BnaA04g12640D
BnaA09G0594500ZS	BnaA09g42810D
BnaC08G0447200ZS	BnaC08g35320D
BnaC04G0433800ZS	BnaCnng13700D
BnaA04G0144200ZS	BnaA04g12720D
BnaA09G0594000ZS	BnaA09g42760D
BnaC08G0446500ZS	BnaC08g35240D
BnaC04G0436600ZS	BnaC04g34770D
BnaA04G0145300ZS	BnaA04g12820D
BnaA04G0147200ZS	BnaA04g12990D
BnaA09G0591400ZS	BnaA09g42480D
BnaC04G0438900ZS	BnaC04g35060D
BnaC08G0443200ZS	BnaC08g34920D
BnaC03G0740200ZS	BnaC03g65500D
BnaC07G0199300ZS	BnaC07g14970D
BnaA03G0241000ZS	BnaA03g23060D
BnaA09G0589000ZS	BnaA09g42240D
BnaC08G0440400ZS	BnaC08g34690D
BnaA04G0151500ZS	BnaA04g13450D
BnaC04G0444100ZS	BnaC04g56110D
BnaA04G0152100ZS	BnaA04g13490D
BnaA09G0588800ZS	BnaA09g42220D
BnaC04G0444500ZS	BnaC04g35630D
BnaC08G0440200ZS	BnaC08g34660D
BnaA09G0588200ZS	BnaA09g42180D
BnaC08G0439700ZS	BnaC08g34610D
BnaA04G0152400ZS	BnaA04g13520D
BnaA09G0588000ZS	BnaA09g42160D
BnaC08G0439500ZS	BnaC08g34590D
BnaA03G0240800ZS	BnaA03g23040D
BnaC03G0284400ZS	BnaC03g27190D
BnaA03G0242300ZS	BnaA03g23200D
BnaC03G0286800ZS	BnaC03g27400D
BnaA04G0153700ZS	BnaA04g13620D
BnaA09G0586900ZS	BnaA09g42020D
BnaC04G0446800ZS	BnaC04g35870D
BnaC08G0438400ZS	BnaCnng56680D
BnaA09G0421700ZS	BnaA09g27160D
BnaA09G0526600ZS	BnaA09g36510D
BnaA04G0154400ZS	BnaA04g13660D
BnaC04G0447500ZS	BnaC04g35930D
BnaA08G0085400ZS	BnaA08g07970D
BnaC08G0121900ZS	BnaC08g09220D
BnaA09G0586200ZS	BnaA09g41950D
BnaA04G0154900ZS	BnaA04g13700D
BnaA09G0586000ZS	BnaA09g41930D
BnaC04G0447900ZS	BnaC04g35970D
BnaC08G0437500ZS	BnaC08g34430D
BnaA09G0583600ZS	BnaA09g41660D
BnaA09G0581100ZS	BnaA09g41470D
BnaC08G0433700ZS	BnaC08g34050D
BnaA03G0152200ZS	BnaA03g14530D
BnaA04G0166400ZS	BnaA04g28070D
BnaC04G0463400ZS	BnaC04g37490D
BnaA01G0057300ZS	BnaA01g04940D
BnaA06G0360200ZS	BnaA06g29830D
BnaC07G0332800ZS	BnaC07g26900D
BnaC05G0456100ZS	BnaC05g39010D
BnaC04G0362200ZS	BnaCnng50750D
BnaA09G0573800ZS	BnaA09g40820D
BnaC08G0425100ZS	BnaC08g33320D
BnaA03G0134000ZS	BnaA03g12530D
BnaC03G0155700ZS	BnaC03g15410D
BnaC04G0469200ZS	BnaC04g38130D
BnaC03G0526200ZS	BnaC03g49250D
BnaC05G0393300ZS	BnaC05g32700D
BnaC08G0264400ZS	BnaC08g19700D
BnaA03G0272100ZS	BnaA03g26300D
BnaC03G0327100ZS	BnaCnng45010D
BnaA04G0172100ZS	BnaA04g15260D
BnaA09G0572800ZS	BnaA09g40710D
BnaC08G0423900ZS	BnaC08g33210D
BnaC04G0470000ZS	BnaCnng51090D
BnaA08G0041300ZS	BnaA08g03490D
BnaA09G0571200ZS	BnaA09g40480D
BnaC08G0421600ZS	BnaC08g32920D
BnaA04G0174300ZS	BnaA04g15460D
BnaA09G0571000ZS	BnaA09g40460D
BnaC04G0472300ZS	BnaC04g38480D
BnaC08G0421400ZS	BnaC08g32900D
BnaA03G0237500ZS	BnaA03g22730D
BnaC03G0280500ZS	BnaC03g26770D
BnaA10G0279300ZS	BnaA10g25350D
BnaC09G0597100ZS	BnaC09g50350D
BnaA07G0152100ZS	BnaA07g12910D
BnaA03G0236500ZS	BnaA03g22610D
BnaA07G0152300ZS	BnaA07g12930D
BnaC03G0279500ZS	BnaC03g26640D
BnaC04G0210400ZS	BnaC04g17200D
BnaA07G0151400ZS	BnaA07g12860D
BnaC04G0211300ZS	BnaC04g17290D
BnaA04G0174800ZS	BnaA04g15530D
BnaC04G0472900ZS	BnaC04g38530D
BnaA03G0235700ZS	BnaA03g22540D
BnaA04G0175400ZS	BnaA04g15600D
BnaC03G0278500ZS	BnaC03g26540D
BnaC04G0473700ZS	BnaC04g38620D
BnaA07G0153600ZS	BnaA07g13050D
BnaC04G0208600ZS	BnaCnng71030D
BnaA07G0154200ZS	BnaA07g13110D
BnaC04G0208000ZS	BnaC04g17000D
BnaA07G0154600ZS	BnaA07g13160D
BnaC04G0207500ZS	BnaC04g16900D
BnaA04G0178700ZS	BnaA04g15870D
BnaA07G0154900ZS	BnaA07g13220D
BnaC04G0206900ZS	BnaC04g16860D
BnaC04G0477800ZS	BnaC04g39130D
BnaA03G0233400ZS	BnaA03g22340D
BnaC04G0478300ZS	BnaA04g15930D
BnaA07G0155500ZS	BnaA07g13290D
BnaC03G0275900ZS	BnaC03g47080D
BnaA07G0156100ZS	BnaA07g13320D
BnaC04G0205600ZS	BnaC04g16670D
BnaA07G0157600ZS	BnaA07g13470D
BnaC04G0202800ZS	BnaC04g16380D
BnaA03G0231000ZS	BnaA03g22070D
BnaA04G0184700ZS	BnaA04g16520D
BnaC03G0272600ZS	BnaC03g26450D
BnaC04G0485700ZS	BnaC04g39860D
BnaA04G0185100ZS	BnaA04g16560D
BnaA07G0163400ZS	BnaA07g14020D
BnaC04G0195200ZS	BnaC04g15590D
BnaC04G0486300ZS	BnaC04g39890D
BnaA07G0164900ZS	BnaA07g14330D
BnaA03G0230000ZS	BnaA03g21980D
BnaA05G0141300ZS	BnaA05g12640D
BnaC03G0271300ZS	BnaC03g26300D
BnaC04G0186500ZS	BnaC04g14080D
BnaA04G0190800ZS	BnaA04g28560D
BnaA05G0139900ZS	BnaA05g12510D
BnaA05G0139700ZS	BnaA05g12490D
BnaA05G0139000ZS	BnaA05g12410D
BnaC04G0183400ZS	BnaC04g54380D
BnaA05G0137600ZS	BnaAnng15630D
BnaA05G0137100ZS	BnaAnng15590D
BnaC04G0180500ZS	BnaC04g54560D
BnaA04G0191900ZS	BnaA04g17150D
BnaC03G0167300ZS	BnaC03g16520D
BnaA05G0136600ZS	BnaC04g14820D
BnaC04G0496200ZS	BnaC04g40760D
BnaA04G0192900ZS	BnaA04g17220D
BnaA05G0135900ZS	BnaA05g12280D
BnaC04G0178800ZS	BnaC04g14700D
BnaC04G0497400ZS	BnaC04g40860D
BnaA05G0134700ZS	BnaA05g12180D
BnaA04G0194500ZS	BnaA04g17370D
BnaA03G0146800ZS	BnaA03g13940D
BnaA05G0132300ZS	BnaA05g12000D
BnaC03G0171000ZS	BnaC03g16900D
BnaC04G0175000ZS	BnaC04g14370D
BnaA04G0196600ZS	BnaA04g17550D
BnaA05G0132200ZS	BnaA05g11980D
BnaA03G0147200ZS	BnaA03g13980D
BnaC04G0500300ZS	BnaC04g41110D
BnaA05G0131900ZS	BnaA05g11940D
BnaC04G0174100ZS	BnaC04g14270D
BnaA04G0199800ZS	BnaA04g17950D
BnaC04G0505200ZS	BnaC04g41560D
BnaA03G0149800ZS	BnaA03g14270D
BnaA04G0201600ZS	BnaA04g18010D
BnaC03G0174600ZS	BnaC03g17240D
BnaC04G0507200ZS	BnaCnng27050D
BnaA05G0127400ZS	BnaA05g11470D
BnaC03G0176300ZS	BnaC03g17380D
BnaC04G0165900ZS	BnaC04g13580D
BnaA04G0202900ZS	BnaA04g28780D
BnaC04G0508900ZS	BnaC04g42000D
BnaA04G0203000ZS	BnaA04g28790D
BnaA05G0127900ZS	BnaA05g11510D
BnaC04G0166600ZS	BnaC04g13540D
BnaC04G0509000ZS	BnaC04g42030D
BnaA04G0203100ZS	BnaA04g28800D
BnaA05G0128000ZS	BnaA05g11520D
BnaC04G0166800ZS	BnaC04g13520D
BnaC04G0509100ZS	BnaC04g42050D
BnaA04G0206000ZS	BnaA04g18360D
BnaA05G0126300ZS	BnaA05g11380D
BnaC03G0176900ZS	BnaC03g17450D
BnaC04G0163800ZS	BnaC04g42440D
BnaA03G0152000ZS	BnaA03g14510D
BnaC03G0177900ZS	BnaC03g17550D
BnaA04G0204800ZS	BnaA04g18220D
BnaA05G0124900ZS	BnaA05g11260D
BnaC04G0156700ZS	BnaC04g13080D
BnaA04G0204300ZS	BnaA04g18180D
BnaC04G0510300ZS	BnaC04g42250D
BnaA04G0204200ZS	BnaA04g18170D
BnaC04G0510200ZS	BnaC04g42240D
BnaA05G0122300ZS	BnaA05g35320D
BnaC03G0178900ZS	BnaC03g17650D
BnaA04G0208100ZS	BnaA04g28870D
BnaA05G0119400ZS	BnaA05g10930D
BnaC04G0149800ZS	BnaC04g12680D
BnaC04G0515700ZS	BnaC04g42720D
BnaC04G0517900ZS	BnaC04g42980D
BnaA04G0208200ZS	BnaA04g28860D
BnaC04G0515800ZS	BnaC04g42730D
BnaA03G0155400ZS	BnaA03g14870D
BnaA05G0116000ZS	BnaA05g10770D
BnaC03G0181200ZS	BnaC03g71930D
BnaC04G0147800ZS	BnaC04g12490D
BnaA05G0116200ZS	BnaA05g10790D
BnaA03G0159300ZS	BnaA03g15230D
BnaC03G0185200ZS	BnaC03g18350D
BnaC03G0184700ZS	BnaC03g18300D
BnaC04G0141600ZS	BnaC04g11750D
BnaA04G0212800ZS	BnaA04g19180D
BnaA05G0111000ZS	BnaA05g10480D
BnaC04G0139100ZS	BnaC04g11470D
BnaA05G0109500ZS	BnaA05g10320D
BnaC04G0136900ZS	BnaC04g11240D
BnaA03G0160900ZS	BnaA03g15390D
BnaA04G0214400ZS	BnaA04g19410D
BnaC03G0187300ZS	BnaC03g18600D
BnaC04G0135700ZS	BnaC04g11110D
BnaC04G0525300ZS	BnaC04g43780D
BnaA03G0161500ZS	BnaA03g15460D
BnaC03G0188100ZS	BnaC03g18670D
BnaA04G0216600ZS	BnaA04g19660D
BnaC04G0527700ZS	BnaC04g44040D
BnaA04G0216700ZS	BnaA04g19670D
BnaC03G0188900ZS	BnaC03g18750D
BnaA03G0162400ZS	BnaA03g15560D
BnaA04G0217500ZS	BnaA04g19780D
BnaC04G0528800ZS	BnaC04g44160D
BnaA05G0137500ZS	BnaC04g14860D
BnaA04G0218300ZS	BnaA04g19840D
BnaA05G0105300ZS	BnaA05g09840D
BnaC03G0189300ZS	BnaC03g18800D
BnaC04G0529500ZS	BnaC04g44230D
BnaC04G0131300ZS	BnaCnng05200D
BnaA05G0105200ZS	BnaA05g09830D
BnaC04G0131200ZS	BnaCnng05190D
BnaA05G0105100ZS	BnaA05g09820D
BnaC04G0131000ZS	BnaCnng05170D
BnaC04G0530100ZS	BnaA04g19890D
BnaA05G0104800ZS	BnaA05g09790D
BnaC04G0130700ZS	BnaCnng05140D
BnaA05G0104700ZS	BnaA05g09770D
BnaC03G0189900ZS	BnaC03g18850D
BnaC04G0130600ZS	BnaCnng62530D
BnaA05G0103700ZS	BnaA05g09660D
BnaC09G0459000ZS	BnaC09g37210D
BnaC04G0129600ZS	BnaCnng58910D
BnaC04G0129300ZS	BnaA05g09630D
BnaA04G0220300ZS	BnaA04g20070D
BnaA05G0102200ZS	BnaA05g09550D
BnaC04G0128000ZS	BnaC04g54030D
BnaA04G0220900ZS	BnaA04g20120D
BnaA03G0338800ZS	BnaC03g38610D
BnaA05G0100300ZS	BnaA05g09340D
BnaC04G0533600ZS	BnaC04g10740D
BnaA05G0099600ZS	BnaA05g09270D
BnaC04G0123700ZS	BnaC04g10670D
BnaA03G0166300ZS	BnaA03g15920D
BnaC04G0121700ZS	BnaC04g10580D
BnaA05G0098800ZS	BnaA05g09170D
BnaA04G0222600ZS	BnaA04g20290D
BnaA05G0098600ZS	BnaA05g09150D
BnaC04G0121500ZS	BnaC04g10560D
BnaA05G0097500ZS	BnaC04g10440D
BnaA04G0223000ZS	BnaA04g20370D
BnaA05G0097300ZS	BnaA05g09050D
BnaC04G0536000ZS	BnaC04g10420D
BnaA04G0223500ZS	BnaA04g20400D
BnaC04G0120200ZS	BnaCnng22580D
BnaA05G0096700ZS	BnaA05g09010D
BnaC04G0119900ZS	BnaCnng22550D
BnaA05G0096500ZS	BnaA05g08990D
BnaC04G0119700ZS	BnaC04g10400D
BnaA05G0096300ZS	BnaA05g08970D
BnaC04G0536900ZS	BnaC04g10380D
BnaA05G0094000ZS	BnaA05g08730D
BnaC04G0538500ZS	BnaC04g09870D
BnaA05G0093500ZS	BnaA05g08680D
BnaC04G0112000ZS	BnaC04g09820D
BnaA03G0170100ZS	BnaA03g16200D
BnaC03G0197200ZS	BnaC03g19460D
BnaA03G0170200ZS	BnaA03g16210D
BnaC03G0197300ZS	BnaC03g19480D
BnaA04G0227700ZS	BnaA04g20690D
BnaC04G0541900ZS	BnaC04g44680D
BnaC04G0106700ZS	BnaC04g09410D
BnaA03G0170600ZS	BnaA03g16260D
BnaC03G0197800ZS	BnaC03g19530D
BnaA05G0089500ZS	BnaA05g08340D
BnaA03G0170700ZS	BnaA03g16270D
BnaC03G0198000ZS	BnaC03g19540D
BnaA03G0172700ZS	BnaA03g16450D
BnaA04G0230500ZS	BnaA04g20970D
BnaA05G0089900ZS	BnaA05g08310D
BnaC03G0200500ZS	BnaC03g19820D
BnaA04G0230400ZS	BnaC04g09330D
BnaA05G0087100ZS	BnaA05g08020D
BnaA04G0233000ZS	BnaAnng07530D
BnaC04G0548800ZS	BnaC04g09030D
BnaA03G0174400ZS	BnaA03g16660D
BnaC03G0203100ZS	BnaC03g20070D
BnaA05G0086200ZS	BnaA05g07850D
BnaC04G0101400ZS	BnaC04g08880D
BnaA03G0175600ZS	BnaA03g16750D
BnaC03G0204500ZS	BnaC03g20200D
BnaC04G0099300ZS	BnaC04g08680D
BnaC04G0551400ZS	BnaA04g21080D
BnaC03G0205700ZS	BnaCnng24720D
BnaA09G0494500ZS	BnaA09g33520D
BnaC08G0333100ZS	BnaC08g24330D
BnaA04G0238100ZS	BnaA05g07340D
BnaC04G0094600ZS	BnaC04g08140D
BnaA04G0238200ZS	BnaUnng05130D
BnaA03G0178200ZS	BnaA03g17080D
BnaA04G0239700ZS	BnaA04g21360D
BnaC04G0554800ZS	BnaC04g45080D
BnaA05G0077000ZS	BnaA05g06850D
BnaC04G0089400ZS	BnaC04g07710D
BnaA04G0242500ZS	BnaA04g29150D
BnaC04G0557600ZS	BnaC04g45440D
BnaA04G0243400ZS	BnaA04g21650D
BnaA05G0075700ZS	BnaA05g06750D
BnaC04G0088000ZS	BnaC04g07620D
BnaC04G0558300ZS	BnaC04g45500D
BnaA03G0181800ZS	BnaA03g17490D
BnaC03G0212800ZS	BnaC03g20930D
BnaA03G0182500ZS	BnaA03g17570D
BnaA05G0074300ZS	BnaA05g06620D
BnaC04G0085200ZS	BnaC04g07230D
BnaA05G0074000ZS	BnaA05g06590D
BnaC04G0084800ZS	BnaCnng43460D
BnaA05G0073900ZS	BnaA05g06580D
BnaA05G0073200ZS	BnaA05g06480D
BnaA04G0246100ZS	BnaA04g21890D
BnaC04G0560900ZS	BnaC04g56640D
BnaA03G0184800ZS	BnaA03g56480D
BnaC03G0216800ZS	BnaC03g21310D
BnaA03G0185600ZS	BnaA03g17870D
BnaC03G0217700ZS	BnaC03g21400D
BnaA05G0070500ZS	BnaA05g34790D
BnaA03G0190200ZS	BnaA03g18360D
BnaC03G0223700ZS	BnaC03g21880D
BnaA05G0063700ZS	BnaA05g05780D
BnaA05G0063500ZS	BnaA05g05760D
BnaC04G0069800ZS	BnaC04g05620D
BnaA03G0194800ZS	BnaA03g56640D
BnaC03G0228200ZS	BnaC03g22260D
BnaA03G0195000ZS	BnaA03g56620D
BnaA05G0062400ZS	BnaA05g05680D
BnaC03G0228500ZS	BnaC03g22290D
BnaA05G0061800ZS	BnaA05g05620D
BnaC04G0068100ZS	BnaC04g05390D
BnaA04G0252000ZS	BnaA04g22600D
BnaA05G0060900ZS	BnaA05g05530D
BnaC04G0066800ZS	BnaC04g05250D
BnaC04G0571500ZS	BnaC04g56700D
BnaA03G0197000ZS	BnaA03g18930D
BnaC03G0230800ZS	BnaC03g22490D
BnaA04G0251300ZS	BnaA04g22510D
BnaC04G0572100ZS	BnaC04g46830D
BnaC03G0230900ZS	BnaC03g22500D
BnaC04G0065900ZS	BnaCnng27940D
BnaA05G0059900ZS	BnaA05g34520D
BnaA03G0197400ZS	BnaA03g18970D
BnaC03G0231100ZS	BnaC03g72510D
BnaC04G0065500ZS	BnaCnng27900D
BnaA04G0258100ZS	BnaA04g23280D
BnaC04G0575400ZS	BnaC04g47190D
BnaA03G0198300ZS	BnaA03g19080D
BnaA05G0021000ZS	BnaA05g01880D
BnaC04G0022100ZS	BnaC04g01590D
BnaC04G0022800ZS	BnaC04g52230D
BnaA04G0262900ZS	BnaA04g23690D
BnaC04G0023300ZS	BnaC04g52290D
BnaC04G0579800ZS	BnaC04g56840D
BnaA03G0201400ZS	BnaA03g19370D
BnaA05G0022700ZS	BnaA05g02070D
BnaC03G0237900ZS	BnaC03g23210D
BnaC04G0024500ZS	BnaC04g01710D
BnaA03G0202500ZS	BnaA03g19440D
BnaA04G0264200ZS	BnaA04g23850D
BnaC04G0581400ZS	BnaC04g47610D
BnaA04G0264300ZS	BnaA04g23860D
BnaA05G0023900ZS	BnaA05g02160D
BnaC04G0025700ZS	BnaC04g01830D
BnaC04G0581500ZS	BnaC04g47620D
BnaA09G0435600ZS	BnaA09g28430D
BnaC05G0227600ZS	BnaC05g20760D
BnaA04G0265200ZS	BnaA04g23950D
BnaA05G0024800ZS	BnaA05g02210D
BnaC04G0026400ZS	BnaC04g01900D
BnaC04G0582300ZS	BnaC04g47710D
BnaA05G0025600ZS	BnaA05g02290D
BnaC04G0027100ZS	BnaC04g01970D
BnaA05G0025900ZS	BnaA05g02320D
BnaC04G0027500ZS	BnaC04g02010D
BnaA05G0026300ZS	BnaA05g02360D
BnaC04G0027900ZS	BnaC04g02050D
BnaA03G0204900ZS	BnaA03g19670D
BnaC03G0241600ZS	BnaC03g23560D
BnaA03G0205100ZS	BnaA03g19690D
BnaA04G0268300ZS	BnaA04g24250D
BnaA05G0028500ZS	BnaA05g02590D
BnaC03G0241700ZS	BnaC03g23580D
BnaC04G0585600ZS	BnaC04g48040D
BnaA03G0242200ZS	BnaA03g23190D
BnaC03G0286700ZS	BnaC03g27390D
BnaA05G0029700ZS	BnaA05g02710D
BnaC04G0032200ZS	BnaC04g02550D
BnaA04G0269600ZS	BnaA04g24390D
BnaA05G0029800ZS	BnaA05g02720D
BnaC04G0032300ZS	BnaC04g02580D
BnaC04G0586900ZS	BnaC04g48190D
BnaA03G0207000ZS	BnaA03g56730D
BnaC03G0243800ZS	BnaC03g23780D
BnaA05G0034200ZS	BnaA05g03110D
BnaC04G0036900ZS	BnaC04g52550D
BnaA01G0097300ZS	BnaC01g11160D
BnaA05G0033900ZS	BnaA05g03050D
BnaC04G0036600ZS	BnaC04g52580D
BnaA04G0272400ZS	BnaA04g24700D
BnaA05G0033400ZS	BnaA05g02980D
BnaC04G0590000ZS	BnaC04g48550D
BnaC04G0036100ZS	BnaC04g52630D
BnaA03G0208400ZS	BnaA03g19940D
BnaA05G0034700ZS	BnaA05g03150D
BnaC03G0245400ZS	BnaC03g23930D
BnaC04G0037600ZS	BnaCnng35790D
BnaA05G0035300ZS	BnaA05g34360D
BnaC04G0038400ZS	BnaC04g52870D
BnaA03G0209100ZS	BnaA03g20000D
BnaA05G0035700ZS	BnaA05g34390D
BnaC03G0246300ZS	BnaC03g24000D
BnaC04G0038800ZS	BnaC04g52900D
BnaA05G0038200ZS	BnaA05g03310D
BnaA09G0542400ZS	BnaA09g37880D
BnaC04G0041700ZS	BnaC04g02920D
BnaC08G0389100ZS	BnaC08g29740D
BnaA03G0212600ZS	BnaA03g20360D
BnaC03G0251000ZS	BnaC03g24380D
BnaA05G0039900ZS	BnaA05g03490D
BnaC04G0043700ZS	BnaC04g03030D
BnaA04G0278900ZS	BnaA04g25390D
BnaA05G0040200ZS	BnaA05g03520D
BnaC04G0043900ZS	BnaC04g03050D
BnaC04G0597000ZS	BnaC04g49280D
BnaA05G0040500ZS	BnaA05g03550D
BnaC04G0044200ZS	BnaC04g03080D
BnaC04G0044400ZS	BnaC04g03100D
BnaA03G0213800ZS	BnaA03g20510D
BnaA05G0040900ZS	BnaA05g03590D
BnaC04G0044600ZS	BnaC04g03120D
BnaC04G0597900ZS	BnaC04g49380D
BnaC07G0395700ZS	BnaC07g32540D
BnaC03G0253300ZS	BnaC03g24590D
BnaA03G0215000ZS	BnaA03g20570D
BnaA05G0042000ZS	BnaA05g03680D
BnaC03G0253500ZS	BnaC03g24610D
BnaC04G0045800ZS	BnaC04g03270D
BnaC03G0253900ZS	BnaC03g24650D
BnaC04G0598200ZS	BnaC04g49420D
BnaA05G0043200ZS	BnaA05g03800D
BnaC04G0047200ZS	BnaC04g03410D
BnaA05G0043900ZS	BnaAnng19290D
BnaC04G0048500ZS	BnaC04g53090D
BnaA03G0216800ZS	BnaA03g20760D
BnaA04G0281100ZS	BnaA04g25650D
BnaA05G0044000ZS	BnaAnng19300D
BnaC03G0255300ZS	BnaC03g24810D
BnaC04G0048600ZS	BnaC04g03600D
BnaC04G0048900ZS	BnaC04g03630D
BnaC04G0599200ZS	BnaC04g49550D
BnaA03G0217500ZS	BnaA03g20820D
BnaA05G0046600ZS	BnaA05g04190D
BnaC03G0256000ZS	BnaC03g24880D
BnaC04G0052000ZS	BnaC04g05010D
BnaA05G0048000ZS	BnaA05g04320D
BnaC04G0053700ZS	BnaC04g05190D
BnaA05G0048300ZS	BnaA05g04340D
BnaC04G0054000ZS	BnaC04g05220D
BnaA04G0016400ZS	BnaA04g25920D
BnaC04G0602100ZS	BnaC04g50000D
BnaA04G0284400ZS	BnaA04g25980D
BnaA05G0049600ZS	BnaA05g04460D
BnaC04G0055200ZS	BnaC04g03880D
BnaC04G0602600ZS	BnaC04g50050D
BnaA05G0049800ZS	BnaA05g04480D
BnaC04G0055400ZS	BnaC04g03900D
BnaA05G0049900ZS	BnaA05g04490D
BnaC04G0055500ZS	BnaC04g03910D
BnaC09G0566500ZS	BnaC09g47500D
BnaA03G0219500ZS	BnaA03g21100D
BnaC03G0258400ZS	BnaC03g25160D
BnaA03G0219600ZS	BnaA03g21110D
BnaC03G0258500ZS	BnaC03g25170D
BnaA05G0051000ZS	BnaA05g04660D
BnaC04G0057200ZS	BnaC04g04140D
BnaA05G0051100ZS	BnaA05g04670D
BnaA04G0286600ZS	BnaA04g26180D
BnaA05G0052700ZS	BnaA05g04850D
BnaC04G0058600ZS	BnaC04g04190D
BnaC04G0604700ZS	BnaC04g50180D
BnaA04G0287100ZS	BnaA04g26230D
BnaA05G0053200ZS	BnaA05g04900D
BnaC04G0059100ZS	BnaC04g04240D
BnaC04G0605200ZS	BnaC04g50240D
BnaC04G0060400ZS	BnaC04g53290D
BnaA04G0288000ZS	BnaA04g26330D
BnaC03G0260400ZS	BnaC03g25360D
BnaC04G0606700ZS	BnaC04g50380D
BnaA03G0221600ZS	BnaA03g56910D
BnaA05G0054500ZS	BnaA05g05030D
BnaC03G0260600ZS	BnaC03g25380D
BnaC04G0060600ZS	BnaC04g04410D
BnaA03G0222300ZS	BnaA03g21170D
BnaA05G0056800ZS	BnaA05g05240D
BnaC04G0063000ZS	BnaC04g04650D
BnaC03G0262000ZS	BnaC03g25530D
BnaA04G0291000ZS	BnaA04g26630D
BnaC04G0063900ZS	BnaC04g04740D
BnaA03G0223400ZS	BnaA03g21280D
BnaC03G0262500ZS	BnaC03g25640D
BnaA05G0018200ZS	BnaA05g01650D
BnaC04G0018700ZS	BnaC04g00880D
BnaC04G0609900ZS	BnaC04g50750D
BnaA05G0017800ZS	BnaA05g01610D
BnaC04G0018000ZS	BnaC04g00950D
BnaA03G0223600ZS	BnaA03g21300D
BnaC04G0016900ZS	BnaA03g21320D
BnaC03G0263000ZS	BnaC03g25670D
BnaA05G0016300ZS	BnaA05g01500D
BnaC04G0016800ZS	BnaC04g01080D
BnaA05G0015800ZS	BnaA05g01470D
BnaC03G0263500ZS	BnaC03g25720D
BnaC04G0016300ZS	BnaC04g01130D
BnaA03G0225500ZS	BnaA03g21490D
BnaC03G0264800ZS	BnaC03g25870D
BnaA04G0294300ZS	BnaA04g27100D
BnaA05G0012500ZS	BnaA05g01200D
BnaC04G0013000ZS	BnaC04g00760D
BnaC04G0611800ZS	BnaC04g50960D
BnaA05G0012000ZS	BnaA05g01150D
BnaC04G0012500ZS	BnaC04g00710D
BnaA05G0011600ZS	BnaA05g01110D
BnaC04G0012100ZS	BnaC04g00680D
BnaA04G0295000ZS	BnaC04g51650D
BnaA04G0296300ZS	BnaA04g26850D
BnaA05G0007800ZS	BnaA05g00810D
BnaC04G0009700ZS	BnaC04g00460D
BnaA05G0006100ZS	BnaA04g26960D
BnaC04G0007500ZS	BnaC04g51420D
BnaA03G0227000ZS	BnaA03g21700D
BnaC03G0267200ZS	BnaC03g25980D
BnaA05G0004800ZS	BnaA05g00510D
BnaC04G0615400ZS	BnaC04g51270D
BnaC04G0005700ZS	BnaC04g52010D
BnaA03G0227900ZS	BnaA03g21800D
BnaC03G0268100ZS	BnaC03g26070D
BnaA05G0004000ZS	BnaA05g00420D
BnaA05G0003800ZS	BnaC04g51820D
BnaA04G0299700ZS	BnaA04g29550D
BnaA05G0002100ZS	BnaA05g00220D
BnaC04G0002200ZS	BnaC04g00110D
BnaC04G0616800ZS	BnaC04g51120D
BnaA04G0299800ZS	BnaA04g29540D
BnaC04G0616900ZS	BnaC04g51110D
BnaA04G0300700ZS	BnaA04g29470D
BnaC04G0617500ZS	BnaC04g51050D
BnaA03G0022700ZS	BnaA03g01910D
BnaC03G0027600ZS	BnaC03g02430D
BnaA03G0174500ZS	BnaA03g16670D
BnaC03G0203300ZS	BnaC03g20080D
BnaC04G0000800ZS	BnaC04g51780D
BnaC01G0370600ZS	BnaA04g29630D
BnaC04G0618100ZS	BnaC04g51000D
BnaA04G0301300ZS	BnaA04g29620D
BnaC04G0618000ZS	BnaC04g50990D
BnaC05G0564000ZS	BnaC05g48640D
BnaC05G0563400ZS	BnaCnng61510D
BnaC05G0560100ZS	BnaC05g48830D
BnaA03G0283300ZS	BnaA03g27440D
BnaC03G0340900ZS	BnaC03g32460D
BnaC05G0559400ZS	BnaC05g48910D
BnaC03G0164600ZS	BnaC03g16170D
BnaC03G0176600ZS	BnaC03g17420D
BnaA03G0282500ZS	BnaA03g27360D
BnaA05G0493700ZS	BnaA05g33720D
BnaC03G0339800ZS	BnaC03g32360D
BnaA05G0494300ZS	BnaA05g33710D
BnaC01G0493500ZS	BnaCnng05550D
BnaA05G0494500ZS	BnaA05g33680D
BnaC02G0411700ZS	BnaC02g32760D
BnaA01G0417100ZS	BnaA01g33140D
BnaA03G0286200ZS	BnaA03g27730D
BnaC03G0344100ZS	BnaC03g32770D
BnaA03G0286300ZS	BnaA03g27740D
BnaC03G0344200ZS	BnaC03g32780D
BnaC05G0566400ZS	BnaC05g48490D
BnaA03G0287400ZS	BnaA03g27860D
BnaA01G0416100ZS	BnaAnng38870D
BnaC03G0345500ZS	BnaC03g32910D
BnaA01G0415100ZS	BnaA01g32930D
BnaA03G0287800ZS	BnaA03g27910D
BnaC01G0500700ZS	BnaC01g41980D
BnaC05G0568800ZS	BnaC05g48220D
BnaA01G0194300ZS	BnaC08g03320D
BnaA03G0288600ZS	BnaA03g28020D
BnaC01G0500900ZS	BnaAnng24600D
BnaC03G0346700ZS	BnaC03g33050D
BnaA03G0288900ZS	BnaA03g28050D
BnaA10G0202500ZS	BnaA10g18080D
BnaC03G0347000ZS	BnaC03g33080D
BnaC09G0500900ZS	BnaC09g41580D
BnaA03G0289100ZS	BnaA03g28070D
BnaC03G0347300ZS	BnaC03g33100D
BnaC01G0495500ZS	BnaCnng05720D
BnaA03G0289700ZS	BnaA03g28130D
BnaA05G0490800ZS	BnaA05g33330D
BnaC03G0347900ZS	BnaC03g33160D
BnaC05G0545200ZS	BnaA05g33270D
BnaA03G0290500ZS	BnaA03g28200D
BnaC03G0349200ZS	BnaC03g33320D
BnaA01G0408000ZS	BnaC01g40600D
BnaC05G0549400ZS	BnaC05g48110D
BnaA01G0407600ZS	BnaA01g34010D
BnaC01G0507700ZS	BnaC01g40560D
BnaA03G0291900ZS	BnaA03g28360D
BnaC03G0350900ZS	BnaC03g33500D
BnaC05G0552200ZS	BnaC05g48080D
BnaA01G0406400ZS	BnaA01g33900D
BnaA03G0292600ZS	BnaA03g28410D
BnaC01G0508700ZS	BnaC01g40440D
BnaC03G0351300ZS	BnaC03g33540D
BnaC05G0553000ZS	BnaC05g47710D
BnaA03G0293700ZS	BnaC03g33640D
BnaC05G0557100ZS	BnaC05g47370D
BnaA05G0482700ZS	BnaA05g33080D
BnaC05G0557500ZS	BnaC05g47320D
BnaA03G0295200ZS	BnaA03g28670D
BnaC03G0353600ZS	BnaC03g33790D
BnaA03G0295700ZS	BnaA03g28730D
BnaC03G0354200ZS	BnaC03g33850D
BnaA01G0401000ZS	BnaA01g33410D
BnaA05G0480600ZS	BnaAnng10640D
BnaC05G0543200ZS	BnaC05g47040D
BnaA05G0480100ZS	BnaAnng10690D
BnaC05G0542600ZS	BnaC05g46990D
BnaA09G0384700ZS	BnaA03g28900D
BnaC03G0356200ZS	BnaC03g34060D
BnaA09G0384600ZS	BnaA03g28890D
BnaA01G0400800ZS	BnaA01g33380D
BnaC01G0513800ZS	BnaC01g39870D
[truncated: 5,856 more rows]

## Sheet: expression
gene	root	upper_stem_peel	middle_stem_peel	lower_stem_peel	leaf_1	leaf_7	leaf_13	leaf_20	leaf_23	sepal	petal	filament	pollen	bud_2mm	bud_4mm	silique_2DAF	silique_10DAF	silique_wall_18DAF	silique_wall_24DAF	silique_wall_32DAF	silique_wall_40DAF	silique_wall_50DAF	silique_wall_60DAF
BnaA10G0008800ZS	11.41	8.35	5.27	5.07	5.95	6.04	6.89	9.88	5.77	4	10.69	5.17	3.45	5.62	3.58	1.16	5.91	6.59	8.13	4.05	3.45	7.12	8.01
BnaC05G0010300ZS	12.67	8.82	6.61	6.2	6.84	8.56	8.94	10.19	6.28	4.64	11.95	3.76	3.58	5.32	3.6	0.56	5.42	5.19	6.02	4.86	3.66	6.31	5.91
BnaA09G0694500ZS	0	0	0	0	0	0	0	0	0	0	35.24	0	0	0	0	0	0	0	0	0.02	0	0	0.12
BnaC05G0008300ZS	0	0	0	0	0	0	0	0	0	0	305.22	14.2	0.21	0.09	0.12	4.43	0	0	0	0	0	0.02	0
BnaA09G0715900ZS	0	0.04	0	0	0	0	0	0	0	0	17.44	0	0.01	0	0.02	0	0.06	0	0	0	0	0	0
BnaA10G0005200ZS	0	0	0	0	0	0	0	0	0	0	1.07	0.11	0.15	0.37	0	0	0	0	0	0	0	0	0
BnaC05G0007300ZS	0	0	0.19	0.12	0.19	0.08	0.27	0.19	0.24	0.17	1.7	1.4	0.09	0.06	0	0.3	0.17	0.03	0.01	0.03	0	0.03	0
BnaC03G0000500ZS	1.52	2.26	3.08	2.63	3.8	9.87	38.02	376.5	3.45	6.83	0.27	1.08	95.31	23.08	18.44	0.49	0.96	5.58	21	5.04	45.23	363.06	323.38
BnaA10G0005000ZS	0	0	0.03	0.01	0.23	0.17	0.18	0.16	0.22	0.38	0.11	0.02	14.27	3.44	5.52	0.11	0.06	0.06	0.01	0.11	0.3	1.75	72.11
BnaC05G0007100ZS	0	0	0.07	0.09	0.23	0.15	0.25	1.37	0.02	0	0.11	0.07	18.03	4.03	11.2	1.43	0.2	0.03	0.1	0	0.04	1.08	57.97
BnaA10G0004100ZS	4.29	10.77	9.59	7.91	7.84	7.35	6.47	2.77	4.12	4	48.75	178.99	1.74	2.21	0.91	1.21	28.51	55.06	63.76	5	0.62	0.28	0.14
BnaC05G0006000ZS	13.26	30.81	21.3	18.72	22.34	36.1	32.26	20.92	7.8	7.29	30.55	175.53	4.31	6.2	2.08	0.08	29.9	85.14	125	20.01	3.79	0.58	0.09
BnaA09G0695600ZS	0	0.04	0.08	0.07	0.1	0	0.07	0.04	0.14	0.09	21.99	131.56	0.1	0.13	0.28	0.01	0.6	0.17	0.06	0.03	0.03	0.05	0.01
BnaA10G0002600ZS	0.16	0.06	0.28	0.52	0.5	0.25	0.54	0.79	0.03	0	0.31	133.37	23.57	7.94	3.99	467.98	1.34	0.09	0.06	0	0	0	0
BnaC05G0004400ZS	0.1	5.5	0.31	0.33	0.29	0.23	0.51	0.24	0.16	0.27	1.26	122.18	31.81	11.99	12.66	339.41	0.77	0.04	0.04	0.31	0.27	0	0
BnaA09G0718200ZS	21.75	14.26	10.03	10.64	11.61	12.89	14.28	14.02	9.57	4.45	6.68	132.39	26.64	12.9	8.06	491.16	8.22	5.19	5.14	6.89	6.03	9.7	9.83
BnaA10G0001200ZS	0.3	0.72	0	0	0	0	0	0	0.1	0.51	68.87	7.19	0.02	0.06	0	1	51.91	27.16	27.92	10.1	1.28	0	0
BnaC09G0203700ZS	0	0	0	0	0	0	0	0	0	0	0.02	0	0	0	0	0	0	0	0	0	0	0	0
BnaA09G0698500ZS	75.55	107.23	488.68	417.98	388.15	210.6	66.01	20.51	133.39	96.75	284.51	636.07	162.97	471.21	194.63	41.69	311.9	237.44	185.02	117.33	11.05	0.23	0.38
BnaC03G0001600ZS	1.42	1.1	1.22	0.84	1.51	1.34	1.76	2.26	0.93	1.09	0.9	0.98	1.22	1.59	0.92	0.61	0.79	0.56	0.9	1.14	0.69	1.3	0.87
BnaC09G0399500ZS	0	0	0	0	0	0	0	0	0	0	0	0	0	0	0	0	0	0	0	0	0	0	0
BnaA09G0691300ZS	5.57	4.52	2.9	2.8	3.8	3.7	4.82	8	3.28	3.03	4.56	4.47	9.45	12.32	13.43	2.7	7.1	3.3	5.85	7.75	7.22	10.47	14.04
BnaA10G0012600ZS	0	0	0	0	0	0	0	0	0	0	0	0	0	0	0	0	0	0	0	0	0	0	0
BnaC05G0014600ZS	0	0	0	0	0	0	0	0	0	0	0.02	0	0	0	0	0	0	0	0	0	0	0	0.02
BnaC05G0017900ZS	0	0.03	0.1	0.19	0.1	0.15	0.24	0.22	0.01	0	0.13	73.25	9.57	3.79	2.43	175.23	0.07	0.01	0.01	0.01	0	0.14	0.75
BnaA10G0016800ZS	1.16	3.46	0	0.03	0	0	0	0	1.18	0.17	7.92	7.32	0	0	0	0.42	133.19	17.89	12.9	6.13	7.06	0.49	0
BnaC05G0018700ZS	0.5	0.55	1.2	0.73	0.63	0.7	0.42	0.06	0.97	0.07	8.2	25.3	0	0	0	1.53	91.95	7.63	5.92	3.43	5.94	0.3	0
BnaA10G0018700ZS	4.05	5.13	1	0.47	0.42	0.23	0.29	0	5.44	3.09	10.06	13.66	0.11	0.21	0.18	0.08	13.4	1.5	0.72	0.65	0.15	0.05	0
BnaC05G0020900ZS	4.69	6.73	2.02	1.44	1.63	1.33	0.61	0.46	7.79	5.1	12.73	9.49	0.32	0.29	0.24	0	12.72	3.52	2.02	1.86	2.92	0.47	0.19
BnaA09G0687800ZS	1.18	0.67	0.86	0.64	0.9	0.95	1.36	0.66	1.67	1.06	0.17	0	0.28	0.13	0	0.04	0.45	0.23	0.24	0.16	0.23	0.21	0
BnaA08G0315300ZS	39.81	27.22	37.75	38.28	42.02	60.28	68.82	57.38	7.57	19.43	14.77	21.23	44.12	38.86	45.87	22.22	19.03	15.85	15.78	32.83	23.92	28.91	12.81
BnaC05G0027100ZS	28.44	21.77	51.82	55.13	53.23	71.23	74.12	52.09	33.79	47.19	10.71	10.01	10.1	16.35	10.08	15.39	24.77	24.1	25	48.93	31.8	34.35	9.9
BnaC08G0010400ZS	64.34	45.6	120.63	129.74	148.26	228.67	266.83	198.48	17.59	39.66	28.42	37.02	88.66	74.53	86.37	57.79	33.17	29.1	28.87	64.71	53.18	79.16	26.12
BnaA08G0314900ZS	0	0	0	0	0.03	0	0	0	0	0	0	12.2	0.68	0.18	0.07	13.35	0	0	0	0	0	0	0
BnaA09G0683300ZS	0	0	0	0	0	0	0	0	0	0	0	3.78	0.13	0.23	0.02	2.66	0	0	0	0	0	0	0
BnaC08G0011000ZS	0.05	0	0	0	0	0	0	0.05	0	0	0.18	5.97	0.57	0.14	0.14	6.07	0	0	0	0	0	0	0
BnaA09G0682900ZS	2	2.96	0.5	0.7	0.43	0.55	0.51	0.4	1.03	1.44	2.11	0.77	0	0	0	0	2.73	1.26	1.79	2.12	1.57	0.11	0.03
BnaC05G0028500ZS	12.23	26.58	3.25	3.16	2.91	3.14	2.09	1.98	2.92	6.53	5.88	2.11	3.83	3.35	2.43	0	6.95	4.69	6.07	4.72	6.73	3.07	1.7
BnaA09G0704400ZS	2.6	4.04	0.9	1.07	1.16	2.03	2.4	2.17	3.43	2.68	3.32	0.82	0	0	0	0	5.41	2.86	3.5	6.29	5.14	2.31	0.09
BnaA09G0703400ZS	0	0.01	0.02	0.08	0.02	0.03	0.06	0.07	0.02	0.03	0.46	11.42	0.79	0.32	0.16	20.23	0	0.01	0	0	0	0	0
BnaA08G0312300ZS	3.82	2.68	1.54	1.29	1.41	1.66	1.39	1.43	1.35	1.88	3.12	1.99	0.93	1.27	0.83	0.29	4.31	1.81	1.76	2.77	1.84	1.3	1.01
BnaA10G0030900ZS	9.53	7.92	5.02	4.54	4.34	6.61	6.27	7.47	3.43	3.77	9.09	5.94	7.64	8.72	8.02	2.53	6.51	4.07	5.59	5.61	5.51	8.23	8.91
BnaC05G0032300ZS	11.33	9.36	7.8	7.93	7.61	9.39	9.02	10.69	5.7	6.2	10.94	9.02	12.06	15.07	13.08	3.96	10.14	6.44	8.27	9.14	8.34	9.33	10.6
BnaC08G0015400ZS	3.79	3.14	3.47	3.33	3.67	4.56	4.53	5.01	2.35	3.09	4.07	13.98	10.71	8.27	6.1	61.15	3.74	3.73	3.63	3.81	4.73	5.13	3.76
BnaA09G0701800ZS	0	1.85	0	0	0	0	0	0	0	0.02	0.01	0.02	0	0	0	0	0.01	0	0	0	10.4	0.16	0.41
BnaC05G0036800ZS	9.85	17.32	2.74	2.88	3.28	5.87	7.29	11.28	0.77	0.65	1.58	0.84	63.67	46.44	57.55	0.78	0.84	2.22	3.61	7.3	15.99	20.23	24.22
BnaC08G0513000ZS	0.02	1.56	0	0	0	0	0.06	0.09	0	0.01	0	0.11	0.01	0	0	0.05	0	0	0.02	0	12.49	0.39	0.62
BnaA08G0310600ZS	0.27	0.3	0.18	0.25	0.14	0.19	0.14	0.06	0.17	0.04	0.36	7.34	0.27	0.17	0.1	5.71	1.03	0.29	0.42	0.18	0.04	0.02	0.01
BnaA09G0679900ZS	0	0	0.01	0.01	0.01	0.01	0	0.01	0	0	2.02	15.57	0.4	0.11	0.05	6.2	0	0	0	0	0	0	0
BnaA10G0039200ZS	0.27	0.08	0.03	0.03	0	0.03	0.03	0.03	0.03	0.02	0.24	0.15	0	0	0	0	0.06	0.04	0.03	0.01	0.01	0	0
BnaC05G0040200ZS	0.1	0.21	0.03	0.02	0.02	0.08	0.05	0.11	0.05	0.09	1.37	0.52	0.06	0.18	0.12	0.01	0.31	0.04	0.03	0	0.02	0.1	0.08
BnaC08G0018700ZS	1.85	1.39	0.26	0.26	0.19	0.15	0.09	0.04	0.06	0.13	1.52	4.33	0.07	0.08	0.02	2.45	3.22	1.03	0.93	0.39	0.08	0.03	0
BnaA08G0308700ZS	119.58	90.71	67.2	63.89	62.64	63.94	47.07	52.23	16.57	10.66	12.77	5.22	8.86	7.47	12.54	0.09	30.24	40.1	40.79	96.18	71.12	40.38	5.97
BnaA09G0678200ZS	66.01	40.95	69.76	64.85	68.36	68.8	73.44	75.98	101.09	58.42	17.97	12.95	3.75	6.82	8.2	25.91	8.81	19.82	9.13	18.46	27.25	57.69	13.48
BnaA10G0041800ZS	47.69	54.28	75.09	78.63	75.77	71.86	69.55	134.75	69.14	26.93	39.19	18.38	75.58	68.77	60.89	12.51	30.86	21.31	23.23	51.17	56.85	48.67	33.29
BnaC08G0021600ZS	50.08	28.91	46.91	39.31	41.12	34.18	30.25	36.18	25.39	10.09	19.3	5.32	5.03	4.25	6.96	0.06	17.93	8.32	5.51	10.26	12.04	22.7	7.06
BnaA10G0043100ZS	0	0	0.61	0.68	0.77	0.36	0.38	0.13	0.09	0.01	43.3	0.11	0.02	0.08	0.02	0.43	0	0	0.02	0	0	0	0
BnaC05G0044300ZS	0	0	0.16	0.17	0.14	0.07	0.03	0	0	0.05	22.4	0	0	0	0	0	0	0	0.02	0	0	0	0
BnaA10G0044200ZS	0	0	0	0	0	0.02	0.04	0	0	0	52.94	0	0	0	0	0.02	0	0	0	0	0	0	0
BnaC05G0045100ZS	0	0	0	0	0	0	0	0	0	0	0.07	0	0	0	0	0	0	0	0	0	0	0	0
BnaA10G0046400ZS	0.04	0.1	0.05	0.07	0.1	0.06	0.16	0.08	0.21	0.19	0.61	3.81	0.25	0.43	0.24	0.2	1.57	1.4	2	0.1	0.02	0.03	0.01
BnaC05G0047100ZS	0.14	0.22	0.29	0.3	0.49	0.71	1.45	0.59	0.46	0.58	0.7	3.43	3.22	0.58	0.23	0	1.38	2.04	3.67	1.35	0.02	0.19	0.3
BnaA06G0045900ZS	336.93	340.11	96.98	97.63	105.77	118.17	117.27	185.38	66.77	196.26	312.59	100.06	233.34	255.06	198.53	11.38	387.12	512.45	387.19	412.66	981.42	741.95	758.74
BnaA09G0668700ZS	35.1	43.49	20.35	20	21.93	20.88	14.44	29.75	12.4	22.51	25.46	14.74	52.03	43.08	37.25	1.15	48.14	42.34	70.46	48.55	77.82	48.03	45.64
BnaA08G0301400ZS	0.03	0.14	0.13	0	0.19	0.09	0	0.12	0.12	0	0.27	0.3	0	0	0	0.21	1.12	1.74	1.65	0.18	0.52	0.95	0.97
BnaC05G0057800ZS	199.63	187.08	86.58	84.99	90.01	91.3	90.4	121.74	86.03	198.08	206.3	89.79	136.15	127.89	112.93	19.9	253.48	358.52	235.53	208.68	522.27	390.01	369.22
BnaC08G0032700ZS	0	0	0	0	0	0	0	0	0	0	0	0	0	0	0	0	0	0	0	0	0	0	0
BnaC08G0533800ZS	46.81	78.96	19.69	17.86	20.46	22.17	16.03	40.61	9.48	16.8	24.86	11.67	64.99	61.95	50.66	7.14	68.03	81.69	136.08	73.83	143.94	109.44	81.74
BnaA06G0051900ZS	0	0.02	0	0.02	0	0	0	0	0.02	0.11	0	0.18	0	0	0.04	0.44	0	0	0.07	0.12	0.08	0	0
BnaA09G0665200ZS	13.13	7.06	2.6	2.63	2.76	2.27	2	2.72	5.17	6.24	10.05	7.59	3.56	3.04	2.89	0.43	12.9	5.28	5.75	4.97	5.04	3.85	3.07
BnaC05G0064800ZS	0.02	0	0	0	0	0	0	0	0	0	0.02	0.06	0.11	0.02	0	0.09	0	0	0	0	0.02	0	0
BnaC08G0529800ZS	20.18	13.18	5.38	5.34	5.32	4.95	5.24	5.69	6.14	7.98	16.82	12.1	6.31	5.6	4.65	0.32	20.04	10.98	9.09	9.15	8.4	5.84	4.92
BnaA08G0298200ZS	12.04	5.62	2.28	2	2.46	3.26	2.54	3.99	2.52	2.08	3.54	4.29	2.93	4.63	4.06	0.51	6.26	4.04	3.78	3.92	2.43	4.42	6.03
BnaC08G0187500ZS	7.2	4.45	3.07	3.06	3.68	4.36	4.31	5.69	2.15	1.94	2.3	6.3	3.03	2.45	2.02	0.51	3.33	2.5	3.16	3.14	1.95	4.2	4.31
BnaA06G0052400ZS	26.18	20.07	7.34	7.04	7.16	6.95	6.79	7.23	3.82	7.13	15.83	13.28	6.64	8.83	8.49	1.22	18.01	11.59	18.17	17.02	11.51	8.74	5.83
BnaC05G0065200ZS	16.78	11.55	6.57	6.73	6.59	7.38	6.41	6.72	4.71	6.71	14.78	11.14	6.35	7.88	5.05	1.08	19.05	8.4	9.46	8.64	6.4	5.06	5.63
BnaA06G0059300ZS	6.18	4.27	1.33	0.96	1.35	1.14	1.53	2.51	2.45	3.41	12.36	3.72	0.63	0.81	0.84	0.54	5.29	2.99	3.65	3.12	3.65	2.57	1.43
BnaA08G0292900ZS	9.97	5.39	2.82	2.8	2.99	3.63	3.02	3.08	3.89	6.14	10.01	3.18	0.09	0.33	0.33	0.11	9.02	5.57	4.58	8.08	7.83	6.4	3.1
BnaC05G0074600ZS	7.2	4.8	2.79	2.63	3.04	3.02	2.7	2.58	3.84	5.42	9.59	4.02	1.14	1.79	0.87	0.13	7.06	3.55	4.23	5.16	3.8	1.58	1.28
BnaC08G0196000ZS	6.21	4.79	2.29	2.41	1.81	1.84	1.27	1.06	4.39	6.99	11.04	3.75	0.64	0.46	0.43	0.03	11.72	6.61	6.27	8.68	6.4	3.66	1.03
BnaA06G0059600ZS	10.87	8.7	5.46	5.63	5.71	7.98	8.28	8.96	4	5.19	7.53	6.83	9.56	11.69	9.16	3.77	8.12	5.61	5.85	5.7	6.1	8.31	10.13
BnaC05G0075000ZS	6.16	5.8	3.45	3.77	3.97	5.87	5.35	7.73	1.7	3.38	6.29	5.35	6.74	6.85	6.32	3.18	6.13	3.93	4.49	4.67	4.83	7.54	9.01
BnaC04G0337400ZS	0	0	0	0	0	0	0	0	0	0	0	0	0	0	0	0	0	0	0	0	0	0	0
BnaA08G0292300ZS	106.93	58.88	30.01	31.64	33.2	34.11	39.1	56.24	43.87	39.93	78.36	72.42	33.54	24.77	40.63	3.51	54.12	22.31	41.25	37.12	35.31	36.43	28.4
BnaC08G0196600ZS	95.2	65	32.65	33.51	36.82	37.95	43.99	67.49	41.49	33.46	73.91	90.51	129.97	89.38	111.78	5.6	43.96	18.22	42.73	33.5	34.59	52.54	79.71
BnaA06G0064200ZS	96.33	87.72	7.25	7.59	7.46	6.03	3.91	2.78	20.33	27.6	30.9	43	4.01	31.3	22.3	0.78	108.09	80.25	90.86	76.87	59.93	1.15	0.04
BnaC05G0079800ZS	70.59	77.63	7.92	4.83	6.24	4.64	2.09	0.57	28.38	35.72	31.11	14.67	16.13	77.3	56.91	0.84	120.89	78.95	82.16	67.94	42.08	0.2	0.39
BnaA06G0066700ZS	13.57	23.66	64.92	59.57	70.04	58	61.6	28.02	32.4	9.71	2.72	0.41	0.07	0.04	0.1	0.06	28.17	28	28.43	30.23	11.75	5.6	3.94
BnaA09G0657800ZS	53.18	29.79	21.05	19.89	22.63	13.16	11.38	9.4	23.69	8.7	6.07	14.31	3.46	3.37	1.2	13.53	49.29	43.24	28.42	33.7	20.56	7.11	6.44
BnaC05G0082300ZS	5.55	7.07	13.37	13.02	14.02	8.99	11.03	6.68	5.47	4.71	2.45	1.07	0	0.04	0.21	0.24	13.51	12.34	10.42	11.91	5.71	1.94	1.21
BnaC08G0202000ZS	58.05	20.71	24.48	26.82	27.3	14.59	12.55	7.52	55.31	22.33	4.75	5.33	0.09	0.34	0.03	0.37	12.58	22.23	10.38	18.82	5.47	4.76	8.79
BnaA06G0069600ZS	0.03	0	2.18	1.76	1.6	2.87	2.89	3.28	0	0	0.79	701.99	185.53	65.79	35.49	2842.29	2.45	0	0	0	0.08	0.14	0.05
BnaC05G0086700ZS	0.17	0.08	1.08	1.3	1.31	1.92	1.56	1.76	0	0	0.62	426.54	103.71	35.02	19.14	1796.28	1.48	0.08	0	0	0.59	0.46	0.09
BnaA09G0656100ZS	0.92	0.65	4.72	4.18	3.49	3.61	2.71	0.97	6.75	5.44	12.98	20.64	0.22	0.74	0.29	0.18	9.28	4.47	11.95	1.02	0.42	0.27	0.13
BnaC08G0515300ZS	1.64	1.01	3.27	3	2.98	2.27	1.72	0.6	4.84	3.25	7.46	11.88	0.11	0.19	0.06	0.19	3.58	1.22	2.61	0.83	0.35	0.12	0.08
BnaA06G0072200ZS	6.3	6.06	0.59	0.58	0.31	0.35	0.08	0.03	4.8	4.54	13.48	2.81	0.02	0.04	0.03	0.05	12.17	2.43	1.75	1.68	0.31	0.01	0
BnaA09G0653900ZS	3.83	3.37	0.07	0.1	0.11	0.06	0.02	0.02	0.56	1.61	5.53	2.29	0.01	0.12	0.43	0	3.46	0.78	0.42	0.22	0.04	0	0.03
BnaA09G0656700ZS	0.96	0.82	0	0.05	0	0	0	0	0.59	0.55	2.18	0.64	0	0	0.02	0	2.49	0.26	0.32	0.13	0	0	0
BnaC05G0089600ZS	17.1	13.84	1.87	2.33	1.7	1.63	0.9	0.48	4.79	5.18	19.27	5.63	0.03	0.03	0.09	0.01	17.84	5	3.66	2.86	1.1	0.35	0.06
BnaC08G0514400ZS	3.97	3.31	0.06	0.08	0.11	0.03	0.02	0.02	1.26	2.03	9.59	2.03	0	0.03	0.01	0	7.03	1.33	0.86	0.27	0.17	0.01	0
BnaA08G0284600ZS	4.66	25.84	83.08	76.76	82.86	112.61	123.62	127.55	9.71	7.45	3.12	1.61	17.77	0.12	0.01	0.02	23.29	77.37	63.62	109.03	84	69.54	4.41
BnaC08G0208600ZS	1.73	2.1	1.48	0.92	1.22	1.03	1.13	1.56	1.73	1.99	5.32	2.36	0.92	0.7	0.94	0.08	4.39	3.1	1.64	1.49	1.64	0.74	0.74
BnaC08G0211200ZS	0	0.1	0.05	0.01	0.04	0.06	0.03	0.06	0.26	0.04	0.07	0.05	0	0	0	0	0.09	0.03	0.06	0.03	0.01	0	0
BnaA06G0075600ZS	63.92	48.42	29.08	27.49	28.14	27.06	22.75	21.99	15.35	30.9	74.06	55.36	12.89	15.33	20.59	1.02	43.56	25.36	26.42	19.73	14.56	17.9	25.2
BnaA09G0651300ZS	5.69	3.41	5.75	6.04	6.13	4.74	4.49	4.53	12.68	10.02	9.51	5.09	3	3.72	1.33	0.01	11.8	5.78	7.99	9.7	8.02	5.06	3.24
BnaC08G0212700ZS	1.14	1.09	0.83	0.87	0.79	0.55	0.58	0.41	3.64	2.83	2.82	1.35	0	0.02	0	0	3.27	1.51	1.55	1.53	1.18	0.7	0.17
BnaA06G0085700ZS	0	0	0	0	0	0	0	0.06	0	0	0.05	0.05	1.37	0.32	3.44	0.06	0	0.89	0.7	0	1.21	2.84	22.6
BnaA09G0650000ZS	0	0	0	0	0	0.05	0	0.05	0	0	0.73	0.19	33.21	9.72	38.21	0.05	0	0	0.05	0	0	0.15	67.49
BnaC05G0105700ZS	0	0	0	0	0	0	0.15	0	0	0	0	0	1.82	0.16	1.64	0	0	0.34	0.13	0.05	0.1	0.3	12.62
BnaC08G0509300ZS	0	0	0	0	0	0	0.05	0	0	0	2	0.05	8.44	2.58	7.13	5.2	0	0	0	0	0	0	80.37
BnaC08G0509500ZS	0	0	0	0	0	0	0	0	0	0	0.05	0	5.12	2.15	10.47	0.1	0	0.03	0	0	0	0.05	24.11
BnaA06G0082700ZS	15.9	19.07	4.18	3.96	4.08	3.52	2.56	4.01	8.05	9.64	6.15	2.69	0.71	0.78	0.58	0	13.08	7.97	11.11	8.3	9.25	1.83	0.2
BnaC05G0102000ZS	14.54	18.86	4.43	3.76	4.01	3.84	2.73	4.85	7.23	9.46	6.83	3.49	0.48	0.66	0.53	0	10.99	7.72	10.16	9.41	8.83	3.5	1.34
BnaA09G0644100ZS	0.03	0	0	0	0	0	0	0	0	0	0.02	0.07	0	0	0	0	1.52	0	0	0	0	0	0
BnaC08G0502000ZS	0.01	0	0	0	0	0	0	0	0	0.02	0.23	0.08	0	0	0	0	0.26	0	0.05	0	0.04	0	0
BnaC05G0094100ZS	0.17	0.19	0.05	0.09	0.05	0	0.04	0	0.03	0	0.77	0	0	0	0	0	0.23	0	0	0	0	0	0
BnaA06G0088700ZS	0.02	0.9	5.03	4.69	5.68	4.72	2.55	0.33	0.38	2.87	4.5	0	0	0	0	0	0	0	0	0	0.01	0	0
BnaA09G0639400ZS	0.05	0	0.02	0	0	0	0	0	0	0.24	8.75	0	0	0	0	0	0	0	0	0	0	0	0
BnaC05G0109200ZS	1.85	0.03	0.01	0.03	0.01	0	0	0	0.01	1.22	4.56	0.01	0	0	0	0	0.23	0	0	0	0	0	0
BnaC08G0496800ZS	0.05	0.19	0.04	0.17	0.1	0.23	0.58	1.76	0.09	0.06	0.68	0.12	0	0	0	0	0.09	0.79	0.09	0.01	0.23	0.51	0.33
BnaA06G0090300ZS	7.81	6.41	2.48	2.55	2.71	3.11	2.66	3.17	3.4	5.41	6.45	4.23	3.9	4.14	4.55	1.09	6.95	4.12	4.09	5.14	3.81	4.98	4.92
BnaC05G0110900ZS	5.97	4.67	2.24	2	2.3	2.62	2.66	3.25	2.9	4.08	5.76	4.21	3.58	3.22	3.56	1.03	5.53	3.62	3.54	3.81	3.37	4.78	4.96
BnaA06G0094300ZS	0	0	0	0.04	0.03	0	0	0	1.41	1.22	3.6	1.63	0	0	0	0	5.2	0.17	0.08	0	0	0	0
BnaA09G0633400ZS	0.14	0.06	1.35	1.16	1.08	1.87	2.29	2.72	3.5	5.43	33.14	2.61	0.08	0.71	0.03	0	8.58	0.39	0.14	0.07	0.04	0	0
BnaC05G0115600ZS	0	0.05	0.12	0.07	0.1	0	0	0	1.87	1.97	6.83	3.94	0	0	0	0	7.78	0.2	0.02	0.03	0	0	0
BnaC08G0491200ZS	0.05	0	0.45	0.62	0.64	0.74	2.1	3.47	1.43	2.85	21.29	2.76	1	39.98	0.79	0	3.65	0.34	0.04	0.09	0	0.04	0
BnaA08G0270200ZS	41.24	37.54	6.89	6.74	5.72	6.41	4.31	4.65	8.08	16.47	21.28	28.58	15.27	13.64	22.66	0.79	33.44	20.8	29.98	30.46	25.38	8.77	9.23
BnaC08G0231300ZS	38.34	32.53	5.6	5.83	5.56	5.63	3.99	4.71	6.06	11.36	19.81	22.84	19.77	14.6	24.55	0.7	40.04	20.92	26.92	28.73	22.27	8.99	13.76
BnaA09G0628700ZS	3.22	0.78	1.41	1.17	1.15	1.35	1.03	1.39	3.77	3.88	3.02	7.31	1.32	1.69	1.86	1.31	2.04	0.49	0.29	1.25	0.81	1.46	1.66
BnaC08G0486300ZS	2.86	1.34	0.29	0.25	0.38	0.62	0.89	1.15	2.38	2.97	2.68	9.38	3.78	4.79	4.37	4.21	3.17	0.32	0.19	0.68	0.73	2.36	1.6
BnaA06G0103000ZS	0	0	0	0	0	0	0	0	0	0	16.56	36.7	0.16	0.08	0.14	0	3.31	0.55	0.04	0	0	0	0
BnaA08G0268600ZS	0.49	0.51	0.08	0	0	0	0	0	0	0.12	17	70.29	0.26	0.7	3.12	0.14	6.21	0.88	0	0	0	0	0
BnaC05G0127700ZS	3.52	14.69	0	0	0	0	0	0	0	0.23	11.81	96.96	0.19	0.04	0.4	3.55	2.08	0	0.03	0.03	0.35	0	0
BnaC08G0233100ZS	0	0.04	0	0	0	0	0	0	0	0	11.37	42.43	0.26	0.04	0.55	0.99	0.45	0	0	0	0	0	0
BnaC08G0485100ZS	0	0	0	0	0	0	0	0	0	0	10.7	53.2	0	0	0	0	0	0	0	0	0	0	0
BnaC05G0128500ZS	0.12	0.08	0.07	0	0.19	0.13	0	0.16	0	0	0.13	56.84	1.32	0.56	0.53	8.16	0.19	0.33	0.26	0.04	0.31	0.78	2.43
BnaC05G0129800ZS	1.76	1.44	0.77	1.11	1.32	1.62	2.56	3.92	0.69	0.62	1.59	1.42	13.21	2.86	3.83	1.25	3.07	2.38	4.79	3.41	2.95	11.06	21.25
BnaA07G0388500ZS	16.5	10.98	1.09	1.09	1.15	3.39	3.66	3.61	0.44	2.59	5.02	2.56	0.12	1	1.95	0.63	2	9.47	9.94	7.05	11.35	11.45	44.75
BnaC06G0456800ZS	21.87	18.41	3.38	4.11	4.11	8.5	9.71	9.88	1.09	5	8.18	6.05	21.96	28.3	47.62	3.34	7.86	19.94	19.64	15.32	19.58	24.78	85.99
BnaA06G0111800ZS	1.4	4.19	5.45	6.23	6.83	8.72	6.98	11.85	4.39	4.27	5.75	2.63	3.47	3.82	0.57	0.1	7.58	19.47	14.96	10.44	9.83	1.43	0.59
BnaC05G0137600ZS	0.98	1.96	4.55	4.29	4.94	5.94	4.65	7.51	5.11	3.02	6.86	2.29	0.98	2.97	1.69	0	4.46	3.06	2.8	3.77	1.38	0.14	0.03
BnaA06G0112500ZS	8.13	5.35	2.14	2.03	2.63	2.77	2.84	2.62	2.63	2.25	4.32	3.87	2.18	1.79	1.71	0.35	6.33	2.98	4.06	4.07	3.63	2.97	2.4
BnaA09G0621800ZS	5.95	3.61	2.04	2.41	2.56	3.66	3.57	3.62	1.78	1.41	4.17	4.14	2.26	2.93	2.81	0.44	3.79	1.99	3.43	4.34	3.4	2.72	2.51
BnaC08G0478100ZS	4.15	3.48	1.77	1.95	2.19	2.8	2.44	3.01	1.29	1.84	3.95	3.02	3.54	4.83	3.63	0.63	4.48	2.7	2.72	4.44	4.79	4.39	3.63
BnaC05G0148600ZS	0.08	0	0	0	0	0	0.03	0	0.03	0.04	0.11	0.03	0	0	0	0	0.24	0	0.03	0	0	0	0
BnaA06G0120800ZS	573.55	1309.78	40.57	40.8	37.44	32.51	40.91	45.96	44.54	105.69	33.11	31.86	52.55	60.12	45.14	5.45	72	243.48	333.73	271.36	391.32	43.1	18.3
BnaA08G0260800ZS	238.63	498.36	7.8	7.52	5.62	5.27	8.91	4.37	21.75	53.98	2.53	1.41	22.27	19.87	16.87	0.67	7.92	112.05	173.82	77.74	122.94	38.42	17.03
BnaC08G0241200ZS	310.01	479.62	18.63	16.45	14.82	10.98	24.12	16.75	22.52	68.37	5	4.15	98.21	74.9	82.88	1.53	10.67	152.26	226.9	118.29	166.2	83.24	53.16
BnaA08G0260200ZS	9.98	7.72	3.92	3.25	3.54	4.74	5.14	4.97	2.63	3.63	8.44	5.5	4.1	4.57	4.9	1.85	8.82	3.08	4.69	5.44	4.74	5.73	7.57
BnaC03G0439000ZS	6.46	4.69	3.86	2.45	3.2	3.19	4.06	4.26	2.86	2.26	2.54	2.97	7.64	9.09	6.96	0.98	5.66	3.58	4.29	5.71	4.85	6.62	5.9
BnaC08G0241800ZS	10.58	7.79	4.56	4.34	5.64	5.79	6.92	7.67	3.31	3.64	7.15	8.57	9.39	9.36	9.33	9.36	8.89	4.02	6.51	6.88	6.3	9	7.91
BnaA09G0614000ZS	2.94	2.74	0.22	0.26	0.15	0.07	0.04	0	0.78	1.27	6.67	1.32	0.03	0.12	0.31	0	6.07	0.37	0.34	0.21	0.01	0	0
BnaC08G0469600ZS	4.48	4.14	0.33	0.24	0.28	0.08	0.03	0	0.97	1.18	8.33	1.7	0.09	0.06	0.27	0	6.98	0.49	0.32	0.21	0.03	0.01	0
BnaA06G0126600ZS	23.27	16.78	10.87	9.99	12.32	13.33	13.81	13.3	10.65	13.7	26.24	11.69	3.47	5.8	3.94	0.71	21.93	10.69	11.51	15.37	17.03	15.63	10.31
BnaA08G0257100ZS	4.77	3.35	1.52	1.14	1.5	1.12	1.14	1.44	2.72	1.64	9.6	3.2	0.4	0.49	0.21	0.09	7.42	2.57	3.12	2.55	1.93	0.93	0.45
BnaC05G0154800ZS	19.23	12.46	8.33	7.93	8.34	9.67	9.8	10.71	10.67	14.02	22.03	11	5.99	7.95	5.94	0.46	20.35	10.93	10.95	14.78	15.93	13.52	9.1
BnaC08G0245900ZS	5.69	4.93	2.07	2.15	2.53	2.74	2.75	2.56	2.72	3.07	10	4.47	2.16	1.99	1.55	0.11	7.75	4.85	3.65	5.09	4.2	4.96	1.6
BnaA06G0127500ZS	0	0	0	0	0	0	0	0	0	0	0	1.09	0.05	0.05	0.1	0.67	0	0	0	0	0	0	0
BnaC05G0155700ZS	0	0	0	0.07	0	0.04	0	0.05	0.01	0	0.06	1.36	0	0.01	0.04	0.72	0.05	0	0	0	0	0.02	0.11
BnaA06G0129000ZS	9.26	16.48	11.86	9.78	9.49	7.8	4.38	2.8	14.47	24.96	19.05	15.27	4.35	8.86	1.06	0.16	28.87	19.28	14.02	13.21	6.31	2.18	0.87
BnaA08G0255900ZS	12.84	11.69	5.24	4.62	4.4	2.74	1.42	0.18	10.07	15.16	15.88	5.89	0.26	0.17	0.25	0	13.36	9.41	6.83	5.72	3.09	0	0.01
BnaC05G0156700ZS	17.21	15.16	20.69	19.75	16.95	16.02	10.49	6.81	22.96	38.23	23.43	11.26	7.81	7.43	6.35	0.86	17.81	15.24	10.3	12.03	7.86	7.56	7.13
BnaC08G0247600ZS	7.5	6.84	4.02	3.61	3.04	2.06	0.79	0.14	4.4	10.91	9.38	3.33	0.09	0.03	0.02	0.01	9.66	6.26	3.86	2.02	0.8	0.11	0.01
BnaC05G0157500ZS	0	0	0	0	0	0	0	0	0	0	0	0	0	0	0	0	0	0	0	0	0	0	0
BnaA08G0252900ZS	3.23	2.85	1.26	0.74	2.22	4.32	8.5	83.71	2.97	7.92	6.93	115.35	11.7	4.09	8.52	0.54	2.01	3.03	26.05	0.37	1.7	11.01	9.25
BnaC08G0251600ZS	2.64	3.92	3.71	3.82	5.33	10.83	25.32	162.54	4.96	15.92	15.76	117.37	78.71	21.21	36.15	3.09	4.64	0.98	16.71	0.53	0.7	1.98	2.1
BnaA06G0139100ZS	0	0	0.04	0.04	0	0.04	0.07	0.15	0.08	0.17	1.93	1.49	0.26	0.17	0.33	0	0.14	0	0	0	0	0	0
BnaC07G0066400ZS	0	0	0	0	0	0	0	0	0	0	0	0	0	0	0	0	0	0	0	0	0	0	0
BnaC05G0167800ZS	0	0.23	1.1	1.02	1.04	1.58	2.13	3.56	1.5	0.77	2.92	1.96	1.14	0.1	1.13	0.02	0.41	0.32	0.2	0.68	1	1.09	0.24
BnaC07G0197400ZS	0.6	0.41	0.05	0	0.05	0	0.05	0.25	0.06	0.32	0.46	0.57	11.05	1.52	6.33	0	0.36	0	0.03	0.04	0.04	0.03	3.9
BnaA08G0248600ZS	77.94	65.45	30.99	33.33	30.99	37.79	39.61	54.35	19.08	29.63	42.19	50.13	65.03	79.75	86.09	29.46	39.63	49.41	51.51	44.42	46.06	49.61	54.89
BnaC08G0258200ZS	35.26	33.52	22.28	21.84	22.61	27.29	30.13	40.96	10.77	16.97	29.22	30.9	52.39	68.12	74.04	14.98	28.01	31.85	33.22	33.9	31.91	40.54	47.96
BnaA06G0142500ZS	90.23	53.72	36.42	34.46	36.1	38.87	38.72	45.03	30.14	38.37	51.7	89.67	90.54	114.12	138.04	10.75	94.89	57.88	97	90.09	66.16	54.21	65.83
BnaC07G0196100ZS	42	43.81	53.15	51.68	54.48	58.06	55.62	58.34	43.63	49.17	50.04	78.27	108.9	142.1	166.79	21.24	74.48	44.33	71.21	58.24	45.19	46.36	47.55
BnaA08G0242700ZS	1.69	2.01	0.74	0.52	0.59	0.81	0.88	1.12	1.15	1.09	6.94	2.65	0.42	0.12	0.13	0.06	4.56	1.19	0.85	0.99	1.08	1.13	1.82
BnaC08G0267800ZS	0.03	0.08	0.36	0.2	0.35	0.34	0.22	0.3	0.21	0.25	0.81	0.18	0.08	0.02	0.11	0	0.52	0.24	0.44	0.28	0.2	0.03	0
BnaA08G0240000ZS	0.09	0.1	0.02	0.08	0.07	0.1	0.13	0.15	0.16	0.06	0.16	15.02	0.67	0.28	0.08	8.25	0.06	0	0.06	0.09	0.01	0.1	0.12
BnaC08G0271400ZS	0.03	0	0	0	0	0.02	0.02	0.01	0.02	0	0.04	15.12	0.49	0.16	0.02	2.85	0	0	0	0	0	0	0.02
BnaA07G0236100ZS	0.28	0.08	0.06	0.14	0.17	0.21	0.17	0.23	0.07	0.06	0.13	0.02	0	0	0	0.08	0.11	0.11	0.2	0.11	0.12	0.17	0.01
BnaA07G0373100ZS	1.14	0.84	0.44	0.51	0.48	0.29	0.21	0.31	0.7	0.64	1.94	1.26	0.07	0.06	0.13	0.37	2.77	0.44	0.43	0.59	0.17	0.13	0.05
BnaC06G0256600ZS	2.47	1.34	0.82	0.62	0.89	0.96	1.1	1.54	0.3	0.52	1.48	0.91	0.82	0.45	0.36	0.16	2.86	1.33	2.55	1.48	1.28	2.17	1.19
BnaC06G0438700ZS	4.04	1.61	3.15	3.31	3.84	4.12	4.55	4.08	3.94	1.5	2.42	2.16	0.8	1.14	0.31	4.84	2.3	1.26	1.29	3.05	2.66	2.38	1.92
BnaA07G0121600ZS	0.35	0.12	0.04	0.08	0.07	0.04	0.02	0.17	0	0	0	0.07	0	0	0	0.83	0.03	0.02	0.05	0	0	0.2	0.95
BnaC07G0179000ZS	0	0	0	0	0	0	0	0.02	0	0	0	0	0	0	0	0	0	0	0	0	0	0	0
BnaA08G0238300ZS	0	0	0.01	0	0.02	0	0.02	0.02	0	0.01	2.11	3.1	0.19	0.04	0.11	5.27	0.33	0	0	0.01	0.01	0	0
BnaA09G0458700ZS	80.9	40.75	19.8	20	21.04	30.91	36.19	50.13	1.72	0.53	12.53	19.72	76.7	67.82	55.49	8.09	47.68	22.6	41.63	42.61	37.28	36.97	38.7
BnaC05G0198400ZS	121.99	52.3	22.17	22.31	23.75	34.22	39.53	53.04	2.5	0.75	13.72	21.46	79.95	66.96	53.49	4.35	48.47	21.06	33.94	37.78	32.91	34.17	32.68
BnaA07G0120300ZS	27.99	17.83	26.12	30.31	22.02	19.55	23.21	61.75	40.01	29.7	79.52	106.06	102.05	142.58	127.65	16.98	53.41	39.31	64.11	28.66	45.65	48.05	54.13
BnaA09G0458200ZS	62.76	49.78	48.56	49.91	48.53	48.91	49.11	65.86	51.12	57.35	99.9	116.85	207.05	240.03	261.79	9.45	101.26	54.02	70.78	56.81	72.01	75.3	109.08
BnaC05G0198900ZS	43.99	33.53	23.99	25.26	21.81	21.15	25.05	37.98	37.9	37.47	87.95	76.61	140.93	171.52	183.4	5.06	68.53	42.83	49.47	42.96	59.76	59.92	82.3
BnaC07G0177400ZS	32.85	20.56	22.18	24.47	22.23	18.77	21.48	56.41	38.22	29.39	79.11	103.25	133.13	216.07	168.46	19.82	58.97	44.05	68.33	32.36	52.59	59.93	70.67
BnaA09G0457000ZS	9.78	7.13	5.77	5.24	6.42	6.78	7.54	9.25	7.85	7.68	12.9	8.56	4.26	5.38	2.75	0.98	7.75	4.55	4.13	7.03	5.73	6.3	8.27
BnaC08G0274100ZS	9.07	5.34	3.16	2.9	3.18	3.92	3.82	5.11	2.42	2.54	10.9	5	3.4	5.98	2.54	0.43	9.45	3.08	3.56	4.26	4.27	3.96	3.81
BnaA08G0238100ZS	2.57	2.16	1.24	1.47	1.59	1.48	1.99	3.16	1.67	1.8	5.8	2.16	1.61	2.04	1.11	0.37	4.84	1.72	1.7	2.37	3.02	2.76	3.16
BnaA07G0119000ZS	2.58	9.31	1.01	0.87	0.67	1.16	0.58	0.22	1.93	7.12	4.51	6.35	0	0.04	0.01	0	12.41	5.13	7.55	6.35	1.13	0.07	0
BnaC07G0175800ZS	0.84	2.8	0.98	0.95	0.75	0.86	0.63	0.19	1.65	6.8	1.86	3.72	0.01	0.02	0.11	0	4.77	4.47	8.02	11.55	1.42	0.25	0.02
BnaA09G0454400ZS	58.01	54.68	36.49	36.19	38.88	44.08	43.31	40.05	27.02	32.07	38.97	35.66	45.15	50.31	51.52	39.27	27.84	38.61	35.02	51.36	57.97	41.85	26.17
BnaC08G0275400ZS	99.96	86.87	44.01	46.26	42.11	48.87	43.24	45.62	35.23	49.89	30.92	35.34	37.98	40.48	48.75	16.4	34.41	39.73	43.79	66.13	66.76	36.12	28.14
BnaC05G0204200ZS	52.31	57.82	43.62	41.46	41.28	45.66	44.09	41.59	40.67	53.68	26.49	34.77	48.63	51.57	55.58	36.46	28.36	35.7	40.24	51.93	54.51	38.28	27.96
BnaA07G0117200ZS	0	0	0	0	0	0	0	0	0	0	0.91	0.57	0	0	0	0	3.38	0	0	0	0	0	0
BnaA09G0452100ZS	0.06	0.05	0	0	0	0	0	0	0	0	0.87	0.87	0	0	0	0	2.93	0	0	0	0	0	0
BnaC05G0206300ZS	0	0	0	0	0	0	0	0	0	0	0.56	0.58	0	0	0	0	1.5	0	0	0	0	0	0
BnaC07G0173800ZS	0.03	0	0.02	0	0	0.01	0	0.02	0	0	1.61	1.29	0.07	0	0	0	4.17	0	0	0	0	0	0
BnaA07G0100900ZS	0	0.54	0	0.29	0.04	0.1	0.17	0.33	0	0.1	29.72	14.44	3.83	18.18	5.75	0.55	34.15	8.12	19.8	19.2	11.95	8.59	2.79
BnaC07G0152600ZS	0	0.27	0.51	0.32	0.48	1.11	1.38	1.81	0.03	0.3	40.58	44.17	6.23	16.66	4.25	1.17	34.05	22.39	37.55	23.68	11.29	2.9	0.59
BnaA07G0101500ZS	4.23	3.53	3.78	3.23	3.09	3.54	3.02	2.63	4.04	2.64	3.61	12.43	6.67	12.25	7.46	7.03	3.62	1.68	2.56	2.64	1.84	3.64	2.6
BnaC07G0153400ZS	2.56	2.25	3.38	3.38	3.4	2.5	2.28	1.47	6.63	4.1	3.09	4.18	3.77	6.71	5.13	3.29	2.68	1.16	1.82	2.5	1.45	2.33	2.17
BnaA07G0101800ZS	0.03	0.98	2.88	2.55	2.33	3.91	4.38	5.23	0.99	0.72	1.21	0.47	2.13	0	0	0.08	1.14	0.76	0.94	0.86	0.52	0.74	0.13
BnaC07G0153700ZS	0.04	0.7	1.64	1.79	1.3	1.63	2.07	4.14	1.1	1.01	0.79	0.33	2.75	0	0.01	0.11	2.69	1.07	1.33	1	0.71	1.1	0.38
BnaA07G0103000ZS	0	0.1	0.63	1.51	0.75	1.12	1.76	2.39	0	0	0.26	277.93	93.48	32.43	24.87	1096.17	1.43	0.02	0	0	0	0.05	0
BnaC07G0154900ZS	0.09	0.1	0.6	1.02	0.45	0.97	1.16	1.3	0	0	0.21	254.92	89.49	30.75	18.54	991.17	0.61	0.06	0	0	0	0	0.26
BnaC03G0633800ZS	14.6	10.18	6.49	6.98	7.13	8.82	9.14	10.55	4.67	6.52	10.48	7.99	9.4	12.67	9.39	4.59	9.96	8.07	9.44	10.18	7.47	12.08	15.35
BnaA09G0436000ZS	17.6	13.47	7.85	8.07	9.17	10.28	10.16	14.82	8.22	10.72	23.75	10.81	9.1	12.22	7.25	2.87	17.4	9.99	12.64	11.79	10.85	12.52	15.77
BnaC05G0227200ZS	12.33	9.84	6.69	7.41	8.15	8.98	8.6	11.63	5.33	5.55	12.62	5.51	12.97	18.28	12.49	1.04	11.25	6.69	7.98	10	9.27	10.11	10.31
BnaA08G0227400ZS	9.53	12.16	8.96	8.66	9.21	9.76	8.65	8.67	3.91	6.16	15.17	9.65	6.08	6.26	6.99	2.8	13.46	8.31	11.51	11.97	8.26	8.97	6.1
BnaA09G0438500ZS	19.43	17.81	13.14	13.14	14.61	16.74	17.58	17.15	5.98	7.98	25.6	16.72	25.89	30.52	24.83	8.41	15.76	8.76	11.38	11.27	10.83	19.69	22.49
BnaC05G0225100ZS	23.5	20.66	16.8	17.29	18.52	21.99	23.84	23.87	7.15	10.03	23.53	16.84	32.86	36.34	31.03	15.87	17.98	12.29	12.87	15.82	14.68	29	34.13
BnaA08G0227500ZS	0.67	0.04	0.14	0.22	0.56	2.82	7.8	4.65	1.34	12.89	1	0.36	0.41	0.41	0.4	2.08	0.37	2.91	3.42	0.99	0.43	0.5	0.42
BnaA09G0438900ZS	1.97	0.58	0.22	0.32	0.3	1.56	4.49	3.66	5.14	42.15	2.2	7.29	4.62	11.29	17.43	32.17	0.53	1.66	2.43	2.28	1.77	3.5	0.98
BnaC05G0224800ZS	0.45	1.12	0.85	0.94	1.25	4.71	10.76	22.66	3.33	20.21	3.52	8.74	10.22	15.08	22.75	35.81	1.8	10.96	8.47	6.46	4.89	12.74	3.29
BnaC03G0630000ZS	0.92	0.46	0.88	0.73	1.13	3.48	7.17	6.48	3.76	29.67	1.48	1.6	0.12	0.46	0.31	5.88	1.04	3.53	3.18	1.9	2.12	3.14	1.12
BnaA07G0106800ZS	53.3	36.8	27.9	29.35	30.38	36.26	37.7	43.74	12.42	22.44	41.83	31.13	33.74	44.23	44.05	3.4	28.07	19.66	23.72	32.6	25.71	32.57	33.59
BnaA08G0228200ZS	77.33	60.38	50.39	52.68	53.48	60.44	59.11	60.7	28.93	41.01	69.23	55.04	44.76	62.81	50.97	8.46	59.52	27.14	34.21	43.57	31.12	37.72	42.63
BnaC07G0160900ZS	45.92	34.16	24.19	23.9	26.33	30.18	30.31	34.09	11.19	20.57	35.01	28.78	42.26	53.08	44.58	8.42	28.19	17.29	24.62	30.8	23.27	30.19	32.08
BnaC03G0629100ZS	95.9	70.73	69.68	67.28	72.59	78.55	78.98	74.61	44.39	57.11	78.22	63.03	58.08	89.47	76.32	13.93	55.13	34.38	39.71	50.05	37.93	42.34	53.24
BnaA08G0229400ZS	0	26.77	0	0	0.09	0	0	0.16	0	0	7.42	5.96	105.17	11.03	1.03	0	0.1	0	0.03	0	0.05	0	0
BnaC03G0627700ZS	0	15.94	0	0	0	0	0	0	0	0	4.97	4.15	15.32	0	0	0	0	0	0	0	0	0	0
BnaA09G0430400ZS	3.48	10.54	0	0	0	0.11	0.03	0.18	0.12	0.19	0.21	0.08	0	0	0.05	0	0	0.12	0.34	2.12	2.9	0	0
BnaC05G0234900ZS	6.43	28.9	0	0.04	0.09	0.06	0	0.2	0.22	0.09	0.15	0.41	0	0	0	0.08	0.87	0.61	0.59	5.23	9.88	0.12	0.04
BnaC03G0639000ZS	10.08	11.71	3.13	3.41	3.27	3.42	3.59	4.22	3.47	5.4	13.14	5.26	1.89	4.3	2.89	0.07	15.29	5.7	9.18	10.08	8.65	1.56	1.03
BnaA07G0095700ZS	0	0	0.31	0.23	0.16	0.23	0.21	0.47	0	0	0	50.44	10.51	3.5	1.91	174.58	0.11	0	0	0	0	0	0.03
BnaC07G0146100ZS	0.04	0	0.16	0.07	0.09	0.03	0.23	0.23	0	0	0.03	49.27	8.95	2.62	1.41	135.04	0.12	0	0	0	0	0	0
BnaA09G0424200ZS	75.92	79.86	1.36	1.16	0.53	0.62	0.25	0.05	5.07	12.81	222.75	31.77	0	0	0.32	0	63.88	1.9	1.75	0.44	2.08	0	0
BnaC07G0145900ZS	146.34	153.87	5.06	4.44	3.46	2.69	0.65	0.11	14.14	39.67	141.14	16.5	0.02	0.07	0	0	34.65	37.36	5.45	1.84	0.24	0	0.02
BnaA07G0092000ZS	0.04	0	0.37	0.15	0.34	0.25	0.14	0.24	0	0	0.12	251.01	15.53	5.7	3.5	363.97	0.19	0	0	0	0	0.06	0.04
BnaA08G0211000ZS	0.03	0	0.35	0.28	0.2	0.28	0.63	0.51	0	0	0.22	301.87	22.95	8.54	4.85	401.61	0.34	0	0.03	0	0.02	0.03	0.06
BnaC03G0654500ZS	0	0	0.15	0.39	0.19	0.38	0.2	0.33	0	0	2.23	334.74	27.23	10.45	6.31	480.49	1.24	0.04	0	0	0	0	0
BnaC05G0250200ZS	0.17	0	0.27	0.02	0.12	0	0.04	0.13	0	0.04	0.11	197.83	8.86	3.67	1.49	152.1	0.78	0.02	0	0	0	0	0.06
BnaC07G0141300ZS	0	0	0.08	0.11	0.22	0.13	0.19	0.3	0	0	0.13	132.7	10.41	3.72	1.96	204.37	0.13	0	0	0	0	0	0
BnaA08G0210700ZS	4.19	4.51	3.71	3.18	3.23	2.94	2.05	1.62	4.96	5.06	4.49	3.98	1.87	4.88	4.66	0.18	5.85	4.7	3.45	2.08	2.4	0.35	0.39
BnaC03G0655000ZS	2.06	2.37	6.72	5.89	5.21	4.16	3.04	1.58	7.35	6.47	6.92	3.12	0.84	1.82	2.61	0.09	6.92	3.03	3.01	3.96	1.12	0.05	0.08
BnaA09G0418300ZS	0.16	0.29	0.23	0.2	0.26	0.22	0.16	0.71	0.11	0.29	0.86	0.44	1.47	0.91	0.71	0.02	0.41	0.34	0.15	0.3	0.34	0.94	1.19
BnaC05G0251900ZS	0.31	0.33	0.13	0.21	0.08	0.05	0.11	0.02	0.06	0.32	1.11	0.26	0.03	0.14	0.08	0	0.47	0.52	0.06	0.06	0.14	0.1	0.07
BnaA08G0209600ZS	7.79	5.83	2.62	2.43	2.51	2.05	2.1	6.27	3.66	6.15	12.45	20.31	3.25	1.89	2.85	0.64	19.89	14.13	15.39	7.19	10.85	10.29	8.19
BnaA09G0417500ZS	0.55	0.23	0	0	0.08	0.09	0	0	0.81	0.83	0.54	1.19	0.11	0.04	0.07	0	2.29	0.4	0.55	0.28	0.56	0.03	0
BnaC03G0656400ZS	4.96	3.87	1.66	1.39	1.77	2.08	1.57	2.25	2.74	3.99	11.51	15.2	1.61	1.31	1.94	0.39	14.24	8.56	7.86	3.61	4.69	4.87	2.59
BnaC05G0252200ZS	0.69	0.63	0	0	0.08	0.1	0.11	0.13	0.46	1.38	0.91	0.93	0.13	0	0.04	0.17	1.9	2.03	2.86	0.54	1.89	1.02	0.77
BnaA07G0090700ZS	5.27	3.82	2.48	2.56	2.64	3.28	3.19	2.97	0.91	1.6	1.82	1.39	8.85	7.87	5.01	0.09	3.39	2.21	3.68	6.79	4.57	3.8	2.99
BnaC07G0140000ZS	5.33	4.82	2.34	2.62	2.68	3.38	3.75	5.31	1.24	1.06	3.86	2.4	16	18.46	11.01	0.05	6.1	6.84	8.61	7.03	8.17	11.58	7.89
BnaA08G0207900ZS	14.81	12.3	6.6	6.29	6.57	8.04	6.64	5.89	6.37	7.79	6.59	6.1	6.78	8.93	13.81	0.66	11.65	5.22	8.89	9.45	4.98	10.42	12.62
BnaA09G0415200ZS	0.03	0.07	0.01	0.04	0.01	0.02	0	0.05	0	0.02	0.35	4.23	0.01	0.01	0.02	0.29	0.3	0.02	0.01	0	0.01	0	0
BnaC03G0659800ZS	12.82	9.49	1.59	1.56	2	2.75	2.73	3.17	1.68	3.71	3.6	4.39	15.97	14.2	16.27	0.3	5.54	2.51	4.32	5.21	4.08	7.18	6.11
BnaA08G0207800ZS	5.53	4.22	2.86	2.99	3.54	4.17	4.02	3.9	2.1	2.8	3.14	3.19	7.33	7.72	8.29	1.54	3.16	2.11	2.06	3.86	3.73	4.76	4.78
BnaC03G0659900ZS	7	6.14	4.27	4.13	3.62	4.35	5.13	5.56	2.63	3.64	4.76	5.09	8.81	8.59	8.05	2.81	3.33	3.06	2.93	5.75	5.13	5.16	4.99
BnaA09G0415100ZS	3.64	2.35	0.83	1.32	1.2	2.08	2.29	2.75	2.72	2.53	92.5	1.62	1.73	2.07	2.4	0.15	3.33	0.92	1.4	3.17	2.73	2.61	1.59
BnaA08G0204500ZS	44.51	20.07	7.4	5.85	5.16	4	3.12	3.19	4.74	4.27	18.3	11.43	9.82	19.17	23.35	0.35	25.6	1.98	2.73	2.03	2.17	1.55	3.05
BnaA09G0410300ZS	21.75	21.71	4.57	4.53	4.23	5.02	4.44	4.39	3.94	4.65	23.67	16.48	10.62	23.47	30.32	0.71	21.55	6.45	5.95	6.59	2.31	2.27	3.27
BnaC03G0665100ZS	39.32	19.63	9.43	8.2	8.53	8.28	7.14	6.17	5.21	4.54	13.83	7.96	7.49	20.49	17.41	0.4	12.82	1.07	1.75	1.1	1.06	1.92	2.83
BnaA08G0086700ZS	0	0	0	0	0.03	0	0	0	0	0	0.25	0	0	0	0	0	0.01	0	0	0	0	0	0.04
BnaC08G0124000ZS	0	0	0	0	0	0	0	0	0	0.03	0.27	0	0	0	0	0	0	0	0	0	0	0	0
BnaA09G0402900ZS	5.72	3.87	2.92	2.36	2.87	2.59	3.42	4.35	2.78	3.49	9.1	2.98	3.21	5.23	1.31	0	8.47	5.26	4.34	7.29	9.04	9.08	5.65
BnaC05G0270100ZS	8.05	5.99	5.02	5.31	5.22	6.42	5.87	8.07	4.07	4.99	8.45	4.86	6.78	6.49	4.58	0.51	8.08	6.43	5.85	8.88	12.88	10.61	6.38
BnaA09G0402800ZS	22.71	15.65	10.39	11.15	10.95	13.95	15.9	18.05	9.34	9.61	32.77	15.96	15.25	19.51	14.59	9.83	23.08	12	10.93	14.43	15.83	17.27	15.99
BnaA08G0086600ZS	24.66	17.45	9.71	10.28	10.02	12.11	12.8	13.33	7.17	5.26	14.79	8.86	10.45	11.5	10.84	0.74	19.2	10.9	11.15	18.04	15.67	11.68	8.92
BnaC05G0270200ZS	17.2	12.51	8.29	7.43	8.41	9.49	11.18	12.8	6.24	4.73	16.4	10.28	10.65	12.44	9.04	5.7	16.5	10.19	9.28	11.47	12.83	14.39	12.82
BnaA09G0401500ZS	1.39	0.64	0.06	0.17	0.22	0.26	0.77	0.49	1.52	2.47	0.11	0.66	0.04	0.15	0	0.13	0.57	27.44	5.62	3.81	11.12	3.31	0.32
BnaC05G0271400ZS	0	0	0	0	0	0	0	0	0	0	0.05	0	0	0	0	0	0	0	0	0	0	0	0
BnaA08G0082900ZS	0.4	0.56	0.59	0.54	0.45	0.28	0.27	0.29	0.26	0.12	0.2	0.09	0.05	0.06	0.17	0.06	0.39	0.17	0.24	0.26	0.08	0.11	0.29
BnaC05G0276500ZS	7.82	4.99	3.78	3.92	3.81	4.13	4.28	3.83	2.89	3.6	6.93	4.09	4.8	5.61	4.68	0.35	6.02	3.12	3.14	3.47	2.5	4.13	2.77
BnaA09G0397600ZS	8.89	7.26	10.4	10.26	11.12	10.05	8.09	6.55	6.91	5.28	8.02	4.52	6.49	9.74	12.61	1.43	5.39	2.96	3.36	3.64	2.29	3.84	3.87
BnaC08G0117100ZS	1.97	3.62	9.15	9.02	9.42	8.49	9.68	10.68	5.67	5.18	6.36	4.91	6.8	9.47	9.74	2.79	4.02	2.84	4.42	3.71	1.99	3.76	4.96
BnaC08G0106700ZS	3.9	2.39	3.48	3.97	3.94	6.05	8.87	7.9	0.68	1.04	5.08	1.82	3.21	0.74	1.37	1.81	0.62	0.47	0.66	1.6	0.91	3.06	0.38
BnaC05G0282700ZS	6.83	5.53	6.96	6.56	6.81	6.9	7.36	5.57	4.15	2.73	12.32	3.46	0.93	1.36	3.02	0.97	4.21	2.51	2.91	2.44	1.28	1.28	0.44
BnaA05G0325700ZS	3.11	2.41	1.99	2.15	1.76	2.4	2.22	2.33	6.74	4.79	2.22	1.91	2.33	1.45	1.61	0.24	2.91	1.73	2.61	2.27	2.91	2.17	1.92
BnaC05G0342200ZS	1.54	1.89	1.31	1.28	1.4	1.66	1.76	1.65	2.33	2.86	2.51	1.66	2.19	2.36	2.79	0.13	1.97	1.01	1.52	2.11	2.16	1.18	1.25
BnaA05G0320400ZS	0	0	0.02	0.03	0	0	0.04	0	0	0	883.99	0.02	0.02	0	0.02	0.02	0	0	0	0	0	0.03	0.02
BnaC05G0330500ZS	6.88	5.18	1.96	1.9	2.11	2.12	2.48	2.03	3.41	2.57	4.28	3.02	3.25	2.37	2.94	0	4.74	4.09	5.05	3.87	4.4	1.51	1.28
BnaC06G0100400ZS	0	0	0	0	0	0	0	0	0	0	0	0	0	0	0	0	0	0	0	0.04	0	0	0
BnaA08G0069100ZS	16.19	13.45	7.74	6.51	6.45	8.28	8.63	10.09	9.73	10.89	13.1	10.14	9.53	6.59	6.55	1.09	12.44	58.19	17.06	10.1	33.54	26.93	22.4
BnaC08G0096900ZS	12.45	9.16	4.04	5.38	4.54	4.31	3.13	4	6.22	5.31	10.38	8.92	4.41	3.59	4.74	0.48	12.9	46.21	12.77	13.33	25.01	9.85	11.44
BnaA10G0114200ZS	1.04	0.93	0.13	0.11	0.03	0.09	0.05	0.07	0.38	0.55	3.3	0.74	0.02	0.12	0.09	0.02	2.47	0.21	0.1	0.15	0.06	0.16	0.01
BnaC09G0380200ZS	1.46	1.25	0.14	0.11	0.14	0.15	0.1	0.15	0.47	0.82	3.94	0.85	0.07	0.08	0.11	0.01	3.3	0.24	0.16	0.21	0.07	0.1	0.02
BnaA09G0375600ZS	0	0	0	0	0	0	0	0	0	0	0	0.13	0	0	0	0	1.13	0	0	0	0	0	0
BnaC06G0098600ZS	0	0	0	0	0.05	0	0	0	0	0.04	0.03	0.2	0	0	0	0	2.5	0	0	0	0	0	0
BnaA05G0313200ZS	72.2	78.09	21.64	21.88	27.37	25.78	11.09	75.28	33.81	64.28	26.38	90.14	9.83	10.33	23.58	0.67	185.45	114.23	208.67	81.28	57.57	9.89	8.64
BnaC05G0326000ZS	253.09	270.34	62.34	58.19	64.28	60.68	31.86	177.31	84.06	161.59	44.62	192.49	49.89	83.44	206.18	2.11	368.96	231.46	333.24	161.23	149.9	44.06	34.23
BnaA08G0058400ZS	31.56	16.28	9.27	9.22	9.26	10.47	8.59	7.89	16.35	17.21	17.75	33.38	16.95	20.93	24.75	10.94	22.82	8.96	11.74	13.72	17.33	8.91	6.43
BnaA09G0180400ZS	5.36	0.74	0.2	0.36	0.79	1.7	5.39	5.43	2.64	3.66	0.52	9.9	2.95	2.93	5.44	12.62	1.06	9.05	15.61	8.32	11.77	4.35	1.16
BnaA05G0190900ZS	21.44	18.36	18.28	17.16	17.21	18.08	17.08	15.68	23.32	18.92	21.55	38.43	8.29	9.53	11.16	13.51	17.55	11.27	9.53	12.6	12.78	17.9	8.44
BnaC05G0320700ZS	27.1	22.87	26.13	24.51	25.58	27.43	24.34	26.15	24.58	20.01	23.31	29.83	16.93	11.39	16.46	9.44	26.11	14.31	17.98	19.14	16.15	21.05	16.29
BnaC09G0205200ZS	2.42	0.22	0.27	0.5	0.75	2.09	6.28	8.5	3.58	1.94	0.67	6.4	2.43	1.36	4.06	6.93	0.24	1.72	6.33	1	1.23	0.76	0.27
BnaA10G0068300ZS	22.51	16.63	12.41	11.08	10.73	13.87	10.93	13.45	8.04	7.76	12.06	14.05	12	17.12	12.6	2.47	17.77	10.26	13.13	13.95	11.91	11	13.04
BnaC04G0133000ZS	0.41	0.45	0.34	0.3	0.28	0.23	0.46	0.27	0.38	0.21	0.09	0.17	0.26	0.23	0.16	0.01	0.35	0.17	0.28	0.29	0.24	0.5	0.42
BnaA05G0185500ZS	0	0	0.13	0.16	0.07	0.08	0.16	0.09	0	0	0	305.28	8.07	2.68	1.94	217.71	0	0	0	0.09	0	0	0
BnaC05G0315600ZS	0	0	0.11	0.37	0.17	0.33	0.31	0.17	0	0	0.17	548.45	31.39	10.33	8.03	636.23	0	0	0.01	0	0	0	0.07
BnaC07G0028300ZS	0.88	0.64	0.32	0.44	0.24	0.65	0.73	0.72	0.42	0.16	0.78	0.95	0.23	0.32	0.21	0.02	0.79	0.36	0.47	0.42	0.33	0.62	0.67
BnaC07G0160400ZS	8.92	6.06	4.41	4.52	3.94	5.54	7.55	14.97	2.26	4.52	5.86	5	6.86	5.78	3.82	0.66	4.96	87.48	47.16	18.37	76.14	94.5	57.04
BnaA07G0039400ZS	0	0	0	0	0	0	0	0	0	0	0	0	0	0	0	0	0	0	0	0	0	0	0
BnaA05G0184500ZS	1.02	0.16	0	0.08	0.06	0.34	0.27	0.15	0.12	0.05	0.16	0.12	0.1	0.14	0.15	0	0.02	0	0.02	0.26	0.18	0.32	0.57
BnaA06G0041800ZS	9.94	7.95	3.66	3.82	3.62	3.95	2.99	3.08	2.47	4.37	8.68	7.2	8.45	10.62	10.82	1.52	9.29	5.75	6.22	6.66	5.81	4.23	3.69
BnaC06G0027800ZS	12.36	8.89	5.95	5.43	5.9	7.11	4.72	6	5.17	7.6	14.14	12.72	9.33	12.41	11.24	1.44	13.95	6.06	7.34	7.34	7.6	6.71	4.74
BnaA08G0036200ZS	83.18	103.09	17.33	16.3	16.45	18	17.78	25.74	62.5	40.93	34.46	26.05	16.62	11.67	13.24	2.58	26.64	11.26	29.43	33.34	62.4	17.43	14.85
BnaC08G0043900ZS	67.47	59.85	6.08	6.4	6.88	6.88	6.72	10.5	21.11	20.31	21.63	18.82	5.7	3.9	5.18	0.3	15.59	8.65	20.4	19.65	31.07	9.99	8.04
BnaA05G0183000ZS	130.33	203.74	33.83	34.16	35.34	36.86	29.75	34.09	49.82	44.37	54.05	34.83	12.24	11.48	14.19	3.67	30.33	14.78	41.39	49.56	68.81	14.58	11.57
BnaC05G0311300ZS	111.02	142.32	28.68	29.28	31.48	34.63	28.41	41.6	57.65	42.99	49.06	50.11	34.5	33.93	38.47	5.44	37.27	20.49	51.8	57.66	81.74	22.8	14.04
BnaA03G0466500ZS	0	0	0	0	0	0	0	0	0	0	0	0	0	0	0	0	0	0	0	0	0	0	0
BnaC06G0036500ZS	26.84	21.78	11.96	11.39	12.57	16.24	16.56	21.06	8.33	11.21	15.09	15.38	17.61	17.53	17.95	2.57	18.24	13.12	18.5	16.84	14.14	18.28	18.85
BnaC08G0038200ZS	0.07	0.01	0.17	0.15	0.1	0.22	0.17	0.21	0.18	0.05	0.29	57.41	8.49	3.71	1.85	203.47	0.19	0.01	0.02	0.03	0.01	0.01	0.01
BnaA05G0180800ZS	9.72	7.74	7.46	7.34	9.08	10.3	11.78	12.61	12.41	10.69	12.12	6.98	7.11	10.19	8.98	0.32	15.11	6	10.94	11.34	11.09	10.52	18.23
BnaC05G0305400ZS	5.67	4.63	7.16	7.53	6.96	7.1	8	9.28	10.48	8.04	9.34	4.27	8.29	11.06	9.82	0.07	9.3	4.52	7.78	10.4	8.32	6.14	8.73
BnaA06G0034200ZS	2.55	2.08	0.44	0.51	0.62	0.59	0.5	0.57	0.42	0.51	5.3	1.7	0.48	2.18	0.48	0.06	2.78	0.83	1.04	0.71	0.31	0.19	0.31
BnaC06G0041800ZS	2.3	1.88	0.58	0.47	0.6	0.52	0.46	0.41	0.51	0.75	6.99	2.14	0.7	1.72	0.55	0.15	4.13	1.18	2.03	1.58	1.08	1.04	0.76
BnaA08G0027400ZS	18.2	14.45	6.52	6	6.67	7.86	7.87	7.2	5.43	8.56	9.74	10.33	7.74	7.74	7.54	3.03	11.27	7.54	9.18	10.39	8.15	7.76	6.51
BnaA06G0032300ZS	3.44	2.64	3.47	3.43	3.9	4.93	6.03	5.16	2.1	2.31	1.65	1.56	1.62	1.05	1.37	0.3	2.23	1.33	2.15	2.52	2.24	3.78	1.83
BnaC06G0044900ZS	0.52	0.35	0.15	0.14	0.24	0.36	0.19	0	0.06	0.13	0.3	0	0.15	0	0	0	0.06	0.19	0.29	0	0	0.22	0
BnaC03G0781300ZS	24.31	18.37	14.42	13.52	14.48	14.86	14.92	17.16	8.24	9.72	11.44	12.26	10.91	9.43	9.86	5.08	14.16	9.11	17.01	16.07	11.4	14.86	12.37
BnaA05G0178000ZS	0	0	0	0	0.01	0.01	0	0.02	0	0	0.01	0.52	0.03	0	0	0.76	0.01	0	0	0	0	0	0
BnaA06G0031300ZS	0	0	0.01	0	0	0	0.04	0	0	0	0	1.38	0.22	0.11	0.09	3.41	0	0	0	0	0	0	0
BnaC06G0046900ZS	0.09	0.12	0.05	0	0.03	0	0.07	0.11	0	0.04	0	0.64	0.22	0.08	0.14	1.45	0.05	0.08	0.11	0.25	0.16	0.06	0
BnaC05G0300500ZS	0	0	0	0	0	0	0	0	0	0	0	0.23	0	0	0	0.34	0	0	0	0	0	0	0
BnaC03G0783100ZS	0	0	0.01	0	0	0.01	0.02	0	0	0	0.03	8.1	0.56	0.29	0.02	8.56	0	0	0	0	0	0	0
BnaA06G0025100ZS	6.35	14.9	8.1	9.21	8.83	10.88	11.94	10.46	3.85	5.65	16.09	15	5.29	2.95	7.51	5.47	18.53	4.1	4.64	4.59	3.66	3.15	0.77
BnaC06G0054700ZS	12.74	13.02	6.5	5.95	6.18	6.36	6.36	7.73	3.85	3.87	11.71	7.26	5.09	2.28	5.44	1.22	11.14	2.84	3.85	6.69	4.88	2.52	1.25
BnaC06G0054800ZS	0	0	0	0	0	0	0	0	0	0	0.15	0	0	0	0	0	0	0	0	0	0	0	0
BnaC05G0292600ZS	0.02	0.05	0	0	0.04	0	0	0	0	0	0.07	0	0	0	0	0	0	0	0	0	0	0	0
BnaA08G0020900ZS	24.37	20.73	10.94	11.92	11.77	12.96	12.6	31.44	8.07	17.7	22	19.38	16.15	14.92	16.37	0.92	18.72	30.12	27.33	15.24	24.01	21.59	24.19
BnaC03G0787700ZS	20.4	17.95	10.18	9.62	8.8	9.11	10.42	19.71	6.04	11.22	16.32	12.66	10.93	9.51	9.66	1.17	12.96	20.71	17.66	13.28	17.33	13.3	17.17
BnaA05G0171500ZS	0.86	0.76	0.63	0.75	1.07	1.98	6.57	12.31	1.01	0.72	0.29	0.21	6.74	1.67	1.3	0.07	0.32	34.84	5.97	3.85	23.8	43.78	16.42
BnaA05G0170700ZS	34.77	29.07	8.28	7.07	14.53	17.07	9.7	38.34	11.85	11.7	22.17	29.51	172.6	255.65	293.27	4.61	34.55	45.38	93.39	30.6	54.72	58.42	107.63
BnaA06G0021900ZS	2.93	2.74	1.13	1.24	2.8	4.47	1.99	13.65	2.27	2.82	1.32	4.05	3.87	3.59	14.35	0.06	6.13	0.6	5.95	0.12	0.53	0.39	0.47
BnaC06G0059900ZS	8.62	6.69	2.47	2.44	3	5.09	3.99	5.98	2.16	3.66	4.57	6.44	28.72	9.3	38.14	0.02	7.7	3	14.77	4.12	5.34	2.15	1.4
BnaC06G0120300ZS	6.87	6.33	0.35	0.6	0.35	0.77	0.66	1.67	0.7	1	0.91	1.48	9.88	10.36	11.9	0.51	1.12	0.44	0.37	1.01	2.58	1.44	2.99
BnaA05G0167300ZS	2.48	2.15	1.53	2.07	4.05	2.03	2.43	6.39	3.64	17.42	28.75	25.59	0.34	1	0.66	0.01	111.86	13.51	11.29	12.66	18.9	19.24	1.86
BnaC06G0121000ZS	3.73	2.58	4.13	4.5	10.84	6.82	4.89	6.67	4.67	17.16	23.75	25.23	0.08	0.03	0.07	0.02	83.29	12.49	14.48	12.72	14.24	11.05	2.21
BnaA05G0164800ZS	3.92	3.6	1.28	1.18	1.18	1.38	0.72	0.44	1.94	3.59	5.22	3.91	0.31	0.12	0.15	0	12.2	4.74	4.1	4.63	2.76	2.05	0.1
BnaC06G0124400ZS	5.14	6.65	3.91	4.04	4.64	4.66	4.39	4.13	2.32	2.88	4.13	5.76	2.6	1.89	1.63	0.11	6.49	3.36	3.43	4.66	4.5	3.74	2.11
BnaA06G0013800ZS	0.23	0.07	1.28	2.21	4.43	4.87	2.99	2.29	0.38	0.02	6.58	7.54	4.49	6.71	7.86	0	1.85	0.51	0.29	0.17	0.12	0	0
BnaA05G0155900ZS	0	0	0.03	0.04	0.02	0.05	0.07	0.03	0	0	0.29	18.33	2.54	0.9	0.55	44.53	0.07	0	0	0	0.01	0.01	0.07
BnaA08G0009000ZS	0.09	0.25	0.21	0.2	0.16	0.3	0.4	0.55	0.06	0.03	3.74	9.41	1.42	0.6	0.38	24.46	1.64	0.01	0.01	0.03	0.02	0.17	0.21
BnaC03G0806100ZS	0.74	1.02	0.25	0.29	0.32	0.58	0.62	0.55	0.03	0.05	4.12	7.46	1.49	0.59	0.59	18.28	2.41	0.14	0.09	0.14	0.06	0.2	0.17
BnaC06G0137500ZS	0.1	0.73	0.11	0.15	0.1	0.34	0.32	0.22	0.02	0.04	1.49	13.11	1.19	0.43	0.22	27.17	0.24	0.06	0.04	0.05	0.08	0.24	0.1
BnaA09G0183500ZS	0	0	0	0	0	0	0.01	0	0	0.01	0.04	2.64	0	0.01	0	0.14	0	0	0	0	0	0	0
BnaC09G0208600ZS	0	0.02	0	0	0	0.02	0.01	0.01	0.01	0.01	0.06	1.66	0.02	0.02	0	0.46	0.01	0.02	0	0	0	0	0.01
BnaA09G0182300ZS	0.02	0	0.04	0	0.1	0	0.44	0.07	0	0	1.46	5.09	10.07	1.1	1.72	34.19	0.02	0	0	0	0	0.04	156.04
BnaC09G0206500ZS	0.18	0.19	0.29	0.11	0.4	0.15	0.36	0.26	0.23	0.1	2.02	9.68	5.83	1.77	0.83	30.94	0.37	0.44	0.22	0.13	0.19	0.04	119.15
BnaA09G0575900ZS	0	0	0	0.07	0.03	0.01	0.06	0.11	0	0	0.62	9.77	1.53	0.44	0.07	28.24	0.86	0	0	0.01	0	0.01	0
BnaC08G0427300ZS	0	0.03	0.06	0.09	0.06	0.23	0.13	0.26	0	0.02	0.07	34.14	13	3.87	2.38	103.51	1.13	0.06	0	0.01	0.08	0.09	0.46
BnaA06G0066400ZS	2.82	1.97	2.11	2.15	2.3	1.74	1.79	1.02	1.26	2.05	15.93	497.29	24.23	125.68	43.25	16.51	4.87	1.53	2.29	4.72	3.22	0.35	0.28
BnaC05G0082000ZS	1.85	1.94	2.47	2.44	1.96	2.3	1.93	1.8	1.7	2.5	20.1	449.41	24.58	103.29	40.17	34.89	6.65	2.57	1.64	3.94	3.48	0.64	0.61
BnaA01G0271700ZS	10.29	10.47	12.33	13.15	16.98	18.9	17.65	21.21	11.51	11.1	11.79	9.64	6.36	8.33	8.28	0.98	12.91	8.45	9.73	8.99	10.71	11.63	11.87
BnaC01G0332200ZS	26.37	25.94	24.41	24.66	28.62	30.34	26.77	26.85	25.2	26.38	30.37	23.79	33.74	46.16	44.2	4.13	28.46	15.28	19.41	27.12	24.52	23.51	19.83
BnaA01G0276500ZS	14.74	11.67	7.94	7.8	8.66	10.64	11.89	13.01	4.18	5.4	7.23	7.81	10.97	17.17	17.98	3.07	7.62	7.58	10.37	11.06	9.81	9.5	14.59
BnaA03G0578100ZS	0	0	0	0	0	0	0	0	0	0	0	0	0	0	0	0	0	0	0	0	0	0	0
BnaC01G0338400ZS	14.01	11.73	6.31	7.19	7.54	7.98	9.51	9.74	3.88	4.6	6.68	6.92	7.68	9.14	8.28	1.47	9.91	7.18	8.72	9.88	8.57	9.21	9.01
BnaC04G0232600ZS	5.92	3.93	2.15	2.15	2.05	2.88	3.57	5.08	1.97	2.31	2.83	1.89	3.86	4.95	3.86	0.68	4.29	2.35	4.28	4.16	3.5	4.88	5.72
BnaA01G0279900ZS	0.29	0.11	1.59	2.17	2.2	7.16	9.74	5.95	0.8	0.96	0.33	5.64	32.22	2.91	7.02	0.71	0.04	0.39	2.66	1.34	1.06	10.07	86.3
BnaC01G0342700ZS	0.2	0.13	0.68	0.46	0.71	3.48	6.84	3.34	0.47	0.25	0.39	4.81	4.05	0.2	0.86	0.46	0.23	0.54	1.82	1.65	0.85	4.66	77.82
BnaC09G0175700ZS	0	0	0	0	0	0	0	0	0	0	0	0	0	0	0	0	0	0	0	0	0	0	0
BnaC04G0242600ZS	0	0.02	0	0	0	0	0	0	0	0	0	0	0	0	0	0	0	0	0	0	0	0	0
BnaC09G0172400ZS	33.43	75.58	0	0	0.05	0.04	0	0	0	8.28	9.08	23.1	11.03	0.06	13.06	0.02	11	2.21	2.24	0.81	1.15	0.72	0.16
BnaA03G0591100ZS	0.06	10.72	201.41	240.12	198.56	67.58	41.31	1.63	238.54	210.27	0.24	0.1	0.1	0	0.06	0.1	6.39	182.52	94.5	307.22	77.44	7.35	0.06
BnaA09G0129300ZS	0.65	0.72	0	0	0	0	0	0	0	0	275.93	0.67	0.37	0	0.33	0	0.12	0.01	0.01	0.32	0.84	0.1	0
BnaC09G0137200ZS	8.03	2.74	0.38	0.5	0.38	0.29	0.09	0.03	0.14	0.9	74.91	0.05	0.13	0.02	0.35	0	0.66	0.59	0.44	0.49	0.13	0.11	0.02
BnaA09G0131500ZS	4.75	4.12	2.3	2.59	2.98	2.69	2.25	3.18	2.85	3.96	15.64	5.66	0.35	1.7	0.41	1.71	9.37	2.84	3.58	2.85	3.59	2.63	2.27
BnaC04G0250400ZS	0	0	0	0	0	0	0	0	0	0	0	0	0	0	0	0.03	0	0	0	0	0	0	0
BnaC09G0139400ZS	27.82	26.87	20.73	19.91	21.43	22.12	20.12	23.06	25.61	23.42	35.42	30.59	24.49	33.54	26.99	5.92	30.62	17.25	17.89	22.49	22.63	16.41	16.63
BnaA09G0131700ZS	0.04	0.13	0.66	0.61	0.76	1.17	1.14	1.04	2.4	1.89	0.44	2.02	6.65	0.26	0.73	0.62	0.52	0.2	0.27	0.21	0.34	1.42	2.2
BnaC09G0139600ZS	0.07	0.1	0.34	0.33	0.21	0.37	0.59	1.03	0.55	0.74	0.11	0.27	7.98	1.2	0.76	2.31	0.74	0.23	0.62	0.08	0.17	1.53	3.44
BnaA09G0134600ZS	6.91	4.15	3.36	3.12	3.35	2.93	3.17	5.08	7.7	7.57	9.24	4.65	2.53	3.87	2	0.23	12.76	8.37	11.04	12	10.51	9.14	5.53
BnaC09G0143200ZS	4.79	3.06	1.64	2.02	2.35	1.89	2.22	2.68	6.79	6.67	8.12	11.32	2.46	4.41	2.25	0.15	11.45	6.93	9.53	10.9	8.58	5.36	3.75
BnaA09G0148400ZS	11.5	8.98	5.75	5.75	5.65	6.69	7.56	7.72	4.51	6.47	8.03	7.16	6.87	8.11	7.87	0.5	7.1	6.23	7.88	10.6	7.85	5.28	3.57
BnaA09G0142100ZS	8.26	6.48	5.16	4.74	5.24	6.63	7.32	8.25	3.5	4.07	6.47	6.23	9.85	11.9	9.36	5.96	7.08	3.47	5.09	5.68	4.51	5.96	6.36
BnaC09G0153300ZS	13.1	10.73	8.07	7.92	8.36	9.35	9.96	10.76	4.54	5.24	9.78	7.98	11.28	15.35	12	4.46	8.39	4.97	6.79	7.61	5.14	7.45	7.28
BnaA09G0121600ZS	8.18	4.55	2.02	2.05	1.75	1.42	1.3	1.89	1.99	2.92	10.13	3.37	1.28	1.35	1.34	0.35	16.33	9.16	9.5	5.41	2.42	0.53	1.48
BnaC09G0127400ZS	9.27	5.12	0.68	0.6	0.46	0.53	0.3	0.64	0.98	2.46	8.6	2.84	0.86	1.06	1.66	0.15	18.66	10.88	10.02	7.04	3.76	0.18	0.18
BnaA02G0154400ZS	16.4	18.3	11.74	10.91	10.28	9.12	8.87	25.55	24.73	22.11	11.56	66.12	4.55	3.05	5.93	15.81	24.2	25.15	40.41	13.88	11.3	5.23	0.49
BnaA07G0281500ZS	20.58	15.16	12.29	10.87	9.78	7.75	7.43	8.55	10.79	14.78	13.91	57.53	1.7	1.27	1.35	37.78	28.06	17.78	21.7	11.26	8.52	1.77	1.55
BnaC02G0197600ZS	16.33	16.38	9.5	9.36	7.21	7.44	9.86	16.31	36.84	31.87	11.91	72.79	10.82	4.24	7.79	43.69	27.32	74.45	101.72	17.78	34.36	18.04	1.21
BnaC06G0322500ZS	20.02	17.82	13.65	12.96	11.13	7.17	5.37	7.6	14.79	14.66	21.96	26.73	3.16	3.67	4.32	0.5	40.06	26	22.72	12.76	10.17	3.53	0.85
BnaA07G0282400ZS	20.88	19.03	12.59	12.23	13.19	16.4	14.51	18.26	12.37	15.81	22.09	16.85	16.4	23.2	20.58	9.73	23.52	16.84	18.04	16.12	12.44	18.9	23.58
BnaC02G0200400ZS	3.03	5.83	3.73	4.27	4.61	5.13	4.97	3.57	1.24	1.52	5.81	9.75	6.14	6.5	4.41	50.57	5.35	2.62	2.75	2.56	2.6	2.92	5.98
BnaC06G0323500ZS	18.73	18.35	11.41	11.56	12	13.65	13.05	14.98	12.73	16.19	26.25	15.8	17.08	21.52	19.41	9.33	24.97	12.97	14.6	13.71	9.9	15.03	18.08
BnaA02G0156900ZS	52	341.24	518.9	577.6	628.9	1085.51	782.17	417.53	0	0	0.5	6.72	113.56	1.09	3.32	0.51	10.44	372.42	518.88	1002.34	858.25	1449.22	1.75
BnaC02G0200600ZS	128.27	603.82	453.64	460.63	526.11	998.94	520.06	169.41	0	0	0.39	0.68	36.5	1.9	3.4	0.67	0.23	18.2	101.99	332.93	340.88	713.71	0.25
BnaA07G0287100ZS	3.11	5.68	2.67	2.35	1.82	2.56	10.17	4.92	9.39	28.97	72.8	31.64	76.33	135.12	100.46	6.78	6.85	44.43	30.84	11.42	27.4	74.36	162.22
BnaC06G0329200ZS	2.5	3.94	0.95	0.79	1.38	1.43	5.09	3.16	8.65	32.21	55.37	16.21	60.03	72.58	68.93	4.83	7.78	40.19	27.59	6.11	23.87	94.42	139.96
BnaA02G0165600ZS	1.72	2.59	0.72	0.66	0.74	0.22	0.24	0.15	1.28	2.45	12.68	5.64	0	0	0.02	0.14	12.31	1.72	1.5	1.23	0.8	0.21	0
BnaA07G0280600ZS	0.38	0.28	0	0	0.02	0	0	0	0.12	0.17	1.31	0.45	0.04	0	0	0.23	0.83	0.18	0.14	0.12	0	0	0
BnaC02G0212200ZS	2.83	1.9	0.62	0.69	0.54	0.37	0.19	0.14	1.15	2.21	9.33	4.91	0.11	0.07	0.23	0.03	10.17	1.74	1.81	1.31	0.59	0.23	0
BnaA02G0169000ZS	2.49	1.9	3.27	3.3	6.28	6.43	8.25	46.12	6.06	5.31	1.6	0.87	99.92	6.26	4.4	0.01	1.69	6.62	4.45	1.27	6.43	46	37.45
BnaC02G0217200ZS	15.35	12.4	8.09	8.31	9.64	15.53	17.95	39.38	5.71	4.39	1.18	0.79	146.36	17.6	17.12	0.18	4.27	4.41	9.06	10.2	12.04	15.52	9.31
BnaA07G0296500ZS	0.03	0.09	1.36	1.43	5.14	8.83	20.75	77.98	0.09	0	0.19	74.12	97.3	1.92	1.2	16.25	0.08	0.5	1.63	0.19	0.87	129.24	197.63
BnaC06G0343200ZS	8.11	5.65	2.73	2.63	2.78	3.38	2.8	3.88	1.81	2.34	6.12	4.76	5.27	4.55	4.78	1.71	6.29	5.32	7.97	4.56	5.64	4.59	5.69
BnaA02G0170700ZS	0	0	0	0	0	0	0	0	0	0	0	9.68	0.08	0	0	2.55	0	0	0	0	0	0	0
BnaC02G0219500ZS	0	0	0	0	0	0	0	0	0	0	0.02	7.27	0.17	0.05	0	2.51	0	0	0	0	0	0	0
BnaA02G0171000ZS	0.01	0.01	0.42	0.39	0.21	0.26	0.85	1.01	0.05	0.01	0.16	43.48	15.98	5.18	3.2	219.99	0.27	0	0	0.02	0	0.04	0.01
BnaA07G0298600ZS	0	0.17	0.64	0.8	0.5	1.01	1.31	0.82	0.92	1.91	1.15	132.09	46.29	17.5	10.16	616.39	0.92	0.61	0.05	0.33	0.18	0.05	0.02
BnaC02G0219600ZS	0	0.06	0.46	0.57	0.2	0.65	0.69	1.06	0.01	0.03	0.1	93.1	39.36	14.11	7.05	501.63	0.5	0	0	0	0	0.1	0.02
BnaC06G0344600ZS	0	0.99	1.61	1.28	0.97	2.37	2.47	1.68	3.14	4.82	1.21	86.45	33.4	15.03	8.72	435.02	1.51	1.24	0.4	1.27	1.08	0.48	0.1
BnaA02G0174200ZS	0	0.02	0	0	0	0	0	0	0.03	0.45	0.58	0.17	0	0.08	0.03	0	0	0	0	0	0	0	0
BnaA07G0301700ZS	0	0	0	0.03	0	0	0.1	0.11	0.09	0.25	9.36	5.94	0	0.59	0	0.09	0.35	0	0	0	0	0	0
BnaC02G0224900ZS	0	0	0	0	0	0.03	0	0	0.19	0.36	0.26	0.38	0.06	7.1	0.1	0.06	0.03	0	0	0	0	0	0
BnaC06G0349500ZS	0	0	0.05	0.05	0	0	0.09	0.1	0.69	0.56	14.23	4.42	0	1.85	0	0.07	0	0	0	0	0	0	0
BnaA07G0275100ZS	16.2	24.62	29.53	27.76	31.08	35.44	28.36	22.49	44.22	49.87	64.63	78.69	21.94	40.81	26.85	0.47	23.21	26.65	36.56	56.84	12.8	1.75	0.54
BnaA07G0303400ZS	0	0.12	0.02	0	0.01	0.05	0.13	0.29	0.01	0.14	2.99	0.09	0.06	0.06	0.95	0	0.39	0.08	0	0.08	0.57	0.08	0
BnaC06G0352200ZS	0.05	0.35	0.41	0.3	0.2	0.8	0.65	0.59	0.36	0.43	3.96	0	0.15	0.89	2.27	0	0.7	0.21	0.42	0.68	3.75	0.21	0.11
BnaA07G0303900ZS	595.77	447.11	6.33	8.41	6.11	2.62	0.96	0.29	2.94	19.28	2.2	6.26	0.13	0.25	0.47	0.06	15.61	78.61	307.8	174.89	188.65	0.87	0.09
BnaC03G0506800ZS	0.02	0.02	0	0	0	0	0	0	0	0	0	0	0	0	0	0	0	0.03	0	0.02	0	0	0
BnaC06G0352600ZS	509.05	315.63	6.91	7.82	4.95	2.45	0.77	0.22	3.54	16.7	3.58	9.5	1.75	3.12	10.1	0.09	17.9	95.83	344.89	146.95	152.54	0.54	0.14
BnaA07G0304300ZS	0	0	0	0.08	0	0.53	0.05	0.28	0	0	0.06	0	1.63	0.2	1.4	0	0	0	0.21	0	0.42	0.5	0.26
BnaC06G0352900ZS	0	0	0.18	0	0	0.09	0.32	0.38	0.18	0	0.09	0	8.72	3.71	13.39	0.04	0.06	0.05	0	0	0.12	1.08	0.31
BnaA07G0272700ZS	0.28	0.36	0.41	0.42	0.47	0.44	0.35	0.18	0.43	0.14	0.87	0.26	0.09	0.15	0.04	0	0.34	0.18	0.16	0.75	0.85	0.19	0.17
BnaA07G0306200ZS	3.24	2.3	1.12	1.2	1.28	1.44	1.35	2.46	1.34	1.61	4.19	1.91	0.83	1.97	0.32	0.01	3.76	2.13	2.16	2.88	2.72	4.07	3.22
BnaC06G0355700ZS	2.47	2.06	0.82	0.79	1.09	1.19	1.07	1.64	0.87	1.09	4.24	1.89	1.04	2.28	0.25	0.02	3.75	2.05	1.84	2.16	2.03	2.71	2.45
BnaA02G0179200ZS	0	0.06	0.54	0.04	0.16	0.19	0.16	0.14	0.26	0.03	21.06	28.82	14.08	11.43	0	0	0	0.03	0	0.03	0	0.05	0.02
BnaC06G0356800ZS	0	0	0	0	0	0	0	0	0	0.01	26.58	175.42	81.75	0.03	99.77	0.05	0	0	0	0	0	0.03	0
BnaC01G0232300ZS	3.61	1.92	0.86	0.88	0.88	1.17	1.62	2.39	0.7	0.69	1.76	4.99	0.77	0.63	0.41	5.21	2.31	0.75	1.22	1.58	1.44	1.42	0.55
BnaC03G0615300ZS	12.53	8.59	5.41	4.9	5	6.49	6.71	7.39	6.42	4.02	7.96	5.78	6.6	8.79	5.05	1.34	15.22	8.99	8.04	12.16	12.39	10.53	7.73
BnaA07G0271500ZS	0.4	0.9	14.46	17.69	27.15	68.53	102.83	30.35	0.72	6.18	3.54	1.49	95.83	68.6	71.93	1.87	0.21	1.12	3.03	3.69	1.62	16.21	35.25
BnaA07G0309700ZS	2.53	1.99	8.28	10.74	13.09	33.88	64.16	46.27	0.08	0.66	14.96	1.2	511.76	327.45	554.53	0.19	0.8	1.78	1.8	1.41	2.06	39.71	151.69
BnaC06G0359500ZS	7.94	3.48	17.15	21	22.48	52.34	87.62	73.79	0.26	0.47	16.53	1.07	492.12	374.23	359.64	0.32	0.41	2.15	2.75	4.02	4.83	36.06	121.55
BnaC06G0307300ZS	0.05	0.54	12.35	14.88	19.08	48.04	70.11	14.63	0.25	2.04	1.87	0.58	166.56	51.21	72.21	0.63	0.08	0.63	2.87	1.36	0.57	15.06	33.91
BnaA07G0309800ZS	0	0	0.03	0.06	0	0.03	0.03	0.02	0	0	720.47	0.03	0.01	0	0.06	0.03	0	0	0	0	0	0.03	0.09
BnaC06G0359600ZS	0	0	0	0.01	0.01	0	0.06	0.08	0.01	0	591.95	0.03	0	0.02	0.03	0	0.02	0.01	0	0	0	0.03	0.05
BnaA10G0262100ZS	0	0	0.22	0.35	0.2	0.2	0.28	0.34	0	0	0.44	1527.3	12.06	4.85	3.73	464.61	0.24	0	0	0	0.02	0.04	0
BnaA02G0025600ZS	0	0	0	0	0	0	0	0	0	0	0.08	301.04	0.79	0.2	0.07	5.63	0	0	0	0	0	0	0
BnaC02G0027700ZS	0	0	0	0	0	0	0	0	0	0	0.01	211.98	0	0.06	0	1.11	0	0	0	0	0	0	0
BnaC09G0576300ZS	0	0	0.53	1	0.49	0.9	0.75	0.81	0	0	0.81	1203.59	51.13	19.78	12.38	1268.31	0.66	0	0	0	0	0.11	0.19
BnaA07G0315100ZS	5.83	4.65	6.64	6.65	7	8.17	9.86	11.43	7.69	8.64	6.14	3.65	22.2	15.64	10.51	0.63	9.1	6.19	9.01	10.29	8.37	13.23	12.11
BnaC06G0366500ZS	4.72	3.38	4.54	4.71	5.23	5.27	6.26	6.72	6.14	6.28	6.79	3.36	3.64	3.88	2.45	0.39	9.15	5.03	8.69	7.48	4.23	4.46	3.61
BnaC06G0367000ZS	6.86	3.96	3.51	3.6	4.58	5.6	4.55	4.36	2.38	5.33	3.88	7.31	3.24	5.66	3.31	0	6.03	4.93	7.05	7.78	4.14	2.82	2.11
BnaA07G0316200ZS	0.27	0.68	0.74	0.83	1.12	1.76	7.3	12.54	0.68	0.4	0.62	0.16	6.48	4.48	9.34	0.05	0.29	9.77	12.31	1.85	7.05	23.95	22.96
BnaC06G0367500ZS	0.31	0.48	1.71	2.31	2.7	4.87	10	12.86	1.3	0.68	0.52	0.08	3.65	4.78	6.95	0.37	0.16	7.53	8.29	1.16	4.17	21.76	23.14
BnaA07G0324800ZS	26.11	19.45	8.98	8.83	9.04	9.78	7.45	9.37	9.45	12.07	18.55	17.44	10.48	10.16	11.4	1.62	26.34	13.91	18.43	14.58	10.84	9.28	9.32
BnaC06G0380000ZS	15.66	11.88	4.74	5.15	5.12	5.44	4.76	5.66	5.3	7.61	13.51	12.16	8.45	7.29	8.73	1.64	18.75	10.93	12.38	11.75	7.68	7.62	8.2
BnaC06G0294300ZS	1.99	0.95	0.18	0.28	0.19	0.19	0.13	0.14	1.36	1.26	1.5	2.7	0.37	1.13	0.54	4.71	2.39	0.83	0.71	0.9	0.5	0.09	0.02
BnaC02G0257700ZS	16.72	9.29	5.44	4.76	5.03	11.58	16.86	8.04	0	0.9	5.14	11.11	0.49	1.49	7.77	18.49	6.29	2.82	3.29	0.34	0.62	0.11	0
BnaC06G0382600ZS	3.05	2.07	0.04	0	0.07	0.13	0.23	0	0	0.06	1.54	1.23	0.05	0	0.19	0	0.16	0.02	0.21	0	0	0	0.05
BnaA07G0327800ZS	0	0.66	0.02	0	0.08	0.01	0.06	0.17	0	0	17.84	4.92	0.65	0.4	0.27	8.87	8.57	1.3	1.07	0.9	0.4	0.09	0.07
BnaC02G0259500ZS	0	0	0	0	0	0	0	0	0	0	3.92	0.05	0	0	0	0.12	0.1	0	0	0	0	0	0
BnaA07G0328000ZS	16.89	16.11	6.66	6.22	6.52	6.62	5.78	4.15	10.87	15.09	14.29	10.46	5.4	7.37	6.86	6.3	16.71	8.92	10.24	13.48	8.68	6.87	4.78
BnaC06G0383900ZS	14.17	12.5	7.55	6.56	5.7	4.45	4.71	4.87	10.81	11.55	16.01	13.02	5.28	4.9	4.96	4.61	18.13	11.3	11.03	12.58	9.45	4.76	5.22
BnaA02G0195000ZS	6.3	5.61	5.66	6.21	5.83	5.96	7.13	7.21	2.67	2.8	7.5	6.6	10	11.99	10.55	6.24	5.06	2.52	3.75	6.3	6.12	7.43	5.83
BnaA07G0262400ZS	9.84	5.58	3.92	4.52	3.99	5.22	5.06	6.02	5.42	4.13	8.4	5.36	4.33	5.81	4.69	2.26	9.54	3.43	4.89	5.86	5.3	5.06	7.19
BnaC02G0259600ZS	7.81	8.47	7.67	8.25	8.24	7.96	8.39	7.92	3.18	3.21	5.77	5.48	9.12	10.62	8.58	2.37	4.82	2.75	4.11	5.6	4.77	5.46	4.64
BnaC06G0293400ZS	5.14	3.63	2.38	2.61	2.71	2.58	2.86	4.26	2.26	1.87	7.65	7.25	6.21	8.38	5.88	16.25	5.4	2.61	3.2	3.55	3.54	4.44	5.15
BnaA07G0262200ZS	2.91	6.16	1.17	1.48	1.17	0.77	0.63	0.36	1.08	3.24	9.81	3.81	1.04	0.83	1.84	0.04	4.19	0.87	0.95	0.43	0.25	0.02	0.3
BnaC06G0384400ZS	7.82	7.9	0.8	0.86	0.89	0.58	0.18	0.17	2.78	3.99	14.55	6.01	5.95	3.74	12.83	0.03	11.43	3.55	2.98	2.12	0.67	0.02	1.82
BnaC03G0184000ZS	2.96	1.7	1.21	1.04	0.91	1.17	1.15	2.2	1.32	0.64	2.52	0.97	0.88	0.9	0.6	0.35	1.75	0.43	0.73	1.34	0.92	0.78	0.97
BnaA07G0333100ZS	10.43	5.93	1.68	1.84	2.09	2.4	2.4	4.92	3.06	3.42	12.03	3.39	2	4.25	1.09	0.06	7.69	4.4	4.51	4.21	3.59	4.34	6.48
BnaC06G0391200ZS	9.32	5.89	2.41	2.45	2.75	3.13	2.91	5.38	3.36	3.9	12.04	3.99	2.38	4.29	1.24	0.19	7.7	4.6	4.68	4.59	3.4	5.19	6.76
BnaA09G0259500ZS	0	0	0	0	0	0	0.05	0.08	0	0.04	0	0.44	0	0	0	0.12	0	0	0	0	0	0	0
BnaC06G0288200ZS	0.02	0.26	0	0.04	0.12	0.2	0.31	0.52	0.07	0.1	0.09	0.52	0.23	0	0.35	0.08	0.12	0	0.04	0.16	0.05	0.28	0
BnaA02G0203800ZS	0	0	0	0	0	0	0	0	0.56	1.09	13.4	2.12	0	0	0	0	9.36	0.96	0.5	0.01	0	0	0
BnaA07G0257600ZS	0	0	0.03	0.01	0.01	0.01	0	0	3.11	7.03	44.61	11.76	0.02	0	0.01	0	25.42	2.59	1.04	0.05	0	0	0
BnaC02G0271000ZS	0	0	0	0.01	0.03	0	0	0	1.61	2.98	46.22	7.68	0	0	0	0	19.56	2.42	1.45	0.03	0	0	0
BnaC06G0286700ZS	0	0.06	0.46	0.42	0.34	0.23	0.15	0.05	7.04	17.5	42.17	10.18	0.06	0	0	0.12	33.12	1.07	0.16	0.07	0.02	0	0.03
BnaA07G0337700ZS	36.54	26.75	13.31	13.97	13.85	12.82	14.66	24.14	8.05	12.11	21.69	39.52	12.03	10.71	12.89	5.98	28.84	18.79	26.82	24.83	26.09	22.46	23.42
BnaC06G0396800ZS	37.17	23.18	12.81	13.04	12.39	13.39	13.95	23.08	11.68	16.97	29.98	44.75	23.68	21.17	29.08	3.59	52.44	33.68	33.34	41.72	37.95	30.02	27.44
BnaC06G0398200ZS	17.45	11.54	4.38	4.29	4.71	4.29	3.7	4.1	3.88	6.38	12.66	10.3	4.58	3.11	5.09	0.27	16.15	11.27	12.63	11.24	9.16	7.64	6.07
BnaA07G0339200ZS	0	0	0	0	0	0	0	0.05	0	0	0	0	0.1	0	0.17	0	8.27	0.53	1.28	0	0	0.18	0.35
BnaC06G0399000ZS	14.3	52.97	1.55	1.8	1.45	1.01	0.56	0.23	1.27	4.61	15.79	2.97	0.02	0.06	0.08	0.32	9.52	1.01	1.72	1.22	1.48	0.21	0.01
BnaA07G0339500ZS	0	0	0	0	0	0	0	0	0	0	0	0	0	0	0	0	0.06	0.01	0	0	0	0	0
BnaC06G0283000ZS	0.79	3.13	4.53	4.54	1.93	1.45	2.66	0.41	82.86	36.01	7.91	96.11	0.01	0	0.01	0.11	38.17	7.03	5.23	6.11	5.17	16.22	0.07
BnaC06G0399100ZS	0	0	0.04	0.06	0.03	0.02	0.13	0	0	0	0	0	0	0	0	0	0	0.13	0	0	0.09	0.09	0
BnaA07G0250900ZS	0	0	0	0	0.02	0.02	0	0	0	0	858.21	0.01	0	0.02	0.03	0.01	0	0	0	0	0	0.02	0.05
BnaC06G0277000ZS	0	0	0.02	0	0	0	0	0	0	0	645.95	0	0.04	0	0.02	0.02	0	0	0	0	0	0.01	0.02
BnaA07G0250600ZS	19.27	52.77	1.09	1.09	0.98	0.81	0.47	0.16	0	0.5	0.17	0	0.52	0.78	2.24	0.08	2.11	0.64	0.86	10.56	5.83	2.62	0.22
BnaA07G0347300ZS	1.55	1.06	0	0.04	0	0	0	0	0	0.24	0.04	0	0.16	0	0.07	0	0	0	0	0.02	0.08	0	0
BnaC06G0276500ZS	17.87	52.98	2.1	2.61	2.51	2.58	1.33	0.52	0	0.88	0.23	0.12	0	0.34	0.24	0.08	1.57	0.63	0.59	5.7	5.57	0.82	0.72
BnaC06G0409500ZS	5.78	1.69	0	0	0.12	0.26	0.12	0.46	0	1.02	0	0	0	0	0	0.07	0.13	0.07	0.03	0.07	0.66	0.4	0.19
BnaA02G0213600ZS	0	0.01	0	0	0	0	0	0	0	0	16.17	0	0	0.01	0.06	0	0	0	0	0	0	0	0
BnaA07G0249000ZS	6.49	8.96	3.19	2.87	2.71	1.62	1.45	1.49	7.64	8.83	50.42	9.1	2.72	1.87	1.18	16.6	12.47	4.65	4.77	5.24	3.71	1.15	0.24
BnaC01G0270800ZS	0	0	0	0.01	0	0	0	0	0	0	0	0.02	0	0	0	0.01	0	0	0	0	0	0	0
BnaC06G0274700ZS	1.64	2.45	1.92	1.62	1.74	1.39	1.28	1.2	2.78	2.62	41.87	3.06	1.14	0.83	0.53	2.4	5.8	1.62	1.98	1.88	1.15	0.84	0.51
BnaA05G0030300ZS	1.11	9.2	32.48	32.26	36.11	27.24	33.17	43.1	80.12	54.78	6.45	2.41	2.74	0.28	0.11	0	34.99	36.19	40.2	39.78	30.08	37.91	20.01
BnaC04G0033000ZS	1.22	1.45	7.19	6.69	8.43	4.31	3.95	3.92	20.87	14.09	4.82	1.39	0.32	0.11	0.06	0	16.85	11.97	9.41	9.12	4.41	3.59	0.97
BnaA02G0216100ZS	0	0.02	0	0	0	0	0	0	0.02	0.07	0.87	2.58	0.35	0.74	2.82	0.94	0.9	0	0	0	0	0	0
BnaA07G0352900ZS	0	0.13	0.03	0.03	0.06	0.02	0	0.02	0.02	0.03	3.05	3.41	0.74	1.59	3.89	0	0.89	0	0	0	0	0	0
BnaC02G0288400ZS	0	0.02	0	0	0	0	0.21	0.02	0.02	0.27	1.26	4.88	0.31	0.4	1.73	0.08	1.74	0	0	0	0	0	0
BnaC06G0271100ZS	0.08	0.12	0.13	0.31	0.26	0.28	0.5	0.63	0.17	0.11	1.05	1.48	0.4	0.14	0.77	0	0.62	0.07	0.09	0.13	0.02	0.02	0.03
BnaC06G0416100ZS	0.06	0.16	0	0.02	0.06	0	0.03	0.18	0.04	0.03	1.91	1.95	0.82	2.75	6.13	0	0.59	0	0	0	0	0	0
BnaA07G0355500ZS	52.6	29.79	18.37	19.26	20.33	22.55	18.84	19.05	13.44	16.05	7.98	7.92	8.31	12.15	14.33	0.49	23.99	15.67	16.21	21.29	19.06	5.38	1.44
BnaC06G0418500ZS	56.14	42.13	18.99	19.15	20.52	26.5	24.37	22.56	8.73	11.59	8.87	8.97	13.78	19.77	22.55	0.84	18.42	10.9	10.76	13.03	10.09	10.39	3.92
BnaA07G0356700ZS	37.05	27.92	19.32	18.9	19.9	23.22	20.76	22.59	15.54	16.72	18.31	24.99	17.62	15.04	20.86	2.79	30.03	22.73	26.09	30.23	27.26	21.03	15.04
BnaC06G0420000ZS	20.49	14.25	8.16	7.82	8.54	10	9.6	9.67	8.95	9.92	18.9	17.06	7.09	4.09	5.14	0.57	22.86	16.16	17.22	20.99	16.96	12.67	4.59
BnaA02G0221500ZS	0	0	0	0	0	0	0.02	0.05	0.05	0.43	0.95	1.35	0	0	0	0	0.02	0	0	0	0	0	0
BnaA07G0360800ZS	0	0	0	0	0	0	0	0	0	0.07	0.72	0.18	0	0.07	0.02	0	0.09	0	0.04	0	0	0	0
BnaC02G0298000ZS	0.07	0.09	0.02	0.06	0.02	0	0	0	0.04	0.36	1.07	1.66	0	0.03	0.1	0.01	0.12	0	0	0	0	0	0
BnaC06G0424300ZS	0	0	0	0	0	0	0	0	0	0.05	1.45	0.44	0	0.09	0.02	0	0.02	0	0	0	0	0	0
BnaA07G0241100ZS	0.44	0.11	0	0	0.04	0.06	0.16	0	0.01	0.28	1.07	0	0	0	0	0	0.16	0.28	0	0	0	0	0
BnaC06G0263600ZS	0.18	0.14	0.04	0.05	0.06	0	0	0	0.09	0.26	0.07	0.16	0	0	0	0	0.16	0.03	0.02	0.08	0.05	0	0
BnaA07G0367000ZS	34.08	22.84	15.83	14.94	15.75	20.44	20.01	25.46	12.58	16	35.57	24.52	24.39	28.26	25	12.12	21.82	14.69	14.64	16.85	18.99	19.1	25.69
BnaC06G0431500ZS	90.43	63.94	36.67	38.23	39.7	50.82	50.56	54.52	30.83	33.62	72.03	61.14	24.33	29.99	26.39	31.44	49.19	26.53	33.12	34.71	35.47	40.5	52.91
BnaA07G0367800ZS	8.64	8.01	5.97	6.14	6.53	7.88	8.79	10.69	5.01	5.86	7.87	11.58	10.7	11.64	9.52	25.98	10.13	7.86	9.21	10.34	7.59	11.95	16.35
BnaC06G0432200ZS	10.17	11.04	6.7	6.66	7.2	8.9	9.9	11.32	5.4	5.36	9.05	13.57	16.72	19.29	15.64	31.74	12.29	10.05	10.14	11.11	8.65	12.8	17.93
BnaA07G0368600ZS	0.04	0.13	0.06	0.02	0.05	0.02	0.04	0	0.09	0.33	3.91	2.4	0.14	0.06	0	2.9	0.89	0	0	0.02	0	0	0
BnaC06G0433000ZS	1	1.04	0.16	0.07	0.1	0.03	0.14	0.54	0.29	0.58	3.9	4.89	1.98	3.78	2.18	3.77	2.92	0.26	0.4	0.07	0.05	0.12	0.17
BnaA02G0226400ZS	3.95	2.77	1.71	1.75	1.93	2.13	2.31	2.85	1.4	2.8	7.85	2.99	2.68	2.69	2.27	0.43	7.62	3.06	1.34	1.98	3.13	2.91	1.93
BnaC02G0305200ZS	1.52	1.02	0.65	0.5	0.32	0.64	0.95	1.15	0.23	0.28	0.62	0.4	0.76	0.78	0.51	0.02	0.4	0	0.08	0.18	0.09	0.18	0.45
BnaC06G0261200ZS	11.12	13.06	10.78	9.77	10.45	10.27	8.64	8.16	10.8	11.64	22.17	8.54	0.53	0.33	0.55	0.38	19.42	7.41	8.65	10.55	8.79	6.11	3.08
BnaA07G0370600ZS	0.16	0.14	0.11	0.2	0.11	0.18	0.04	0	0.1	0.05	0.63	0.38	0	0	0	0.18	0.6	0.11	0.14	0.24	0	0	0
BnaC06G0435500ZS	0.73	0.69	0.13	0.07	0.08	0.24	0.29	0.15	0.21	0.21	0.66	0.31	0.07	0.04	0.08	0.16	1.2	0.43	0.34	0.49	0.16	0.08	0
BnaA07G0371300ZS	0	0	0	0.02	0	0.02	0	0.02	0	0	0	28.02	0.32	1.56	2.02	7.92	0	0	0	0	0	0	0
BnaC06G0436500ZS	0	0	0.02	0.04	0.02	0	0.02	0.02	0	0	0.01	28.65	1.61	1.07	0.66	24.69	0	0	0	0	0	0	0
BnaA07G0371800ZS	302.91	221.88	70.16	66.11	64.39	51.07	34.49	34.19	339.25	492.32	246.95	591.5	14.97	18.46	21.65	39.11	459.94	178.09	203.64	148.12	108.59	15.15	16.53
BnaC06G0437000ZS	277.22	187.44	53.08	50.69	52.81	40.87	29.72	27.58	283.2	395.02	258.11	450.02	23.47	25.24	41.42	13.76	547.82	169.51	173.57	154.22	126.54	36.38	26.93
BnaA07G0380800ZS	14.53	13.15	30.4	31.15	29.78	40.73	48.25	54.29	14.34	11.07	17.08	22.88	72.62	109.46	38.1	2.81	16.79	4.82	4.07	24.87	31.14	20.24	43.03
BnaA07G0381000ZS	10.28	8.67	6.57	7.77	7.44	7.52	7.44	8.89	7.36	7.98	18.4	10.6	13.59	17.57	14.57	1.7	9.9	6.17	6.7	8.75	12.78	11.11	10.09
BnaC06G0448000ZS	9.96	6.13	4.31	4.09	4.63	4.15	5.08	7.41	6.67	4.65	13.98	6.23	7.17	8.71	6.05	0.59	12.06	5.86	5.26	6.08	9.17	6.41	10.16
BnaA07G0381700ZS	24.11	13.71	7.08	7.63	8.8	11.86	11.95	13.76	5.47	7.16	13.28	7.02	3.5	4.58	3.95	3.79	13.47	9.47	9.45	10.63	8.15	14.41	17.32
BnaC02G0318500ZS	0	0	0	0	0	0	0	0	0	0	0	0	0	0	0	0	0	0	0	0	0	0	0
BnaA07G0230900ZS	2.63	1.58	0.69	0.66	0.88	1.06	0.95	1.41	1.33	1.95	4.18	1.5	0.72	1.79	0.4	0.03	4.26	1.53	1.21	2.88	2.53	3.13	1.83
BnaA07G0384400ZS	1.58	2.98	4.5	5.07	5.49	5	3.16	2.04	0.68	2.31	24.39	10.85	0	0.1	0.08	0.04	5.99	6.43	4.68	1.82	0.34	0.29	0.58
BnaC06G0452100ZS	0.62	1.46	6.82	6.31	5.52	3.6	1.56	0.58	0.69	1.39	18.98	11.83	1	0.66	1.44	0.03	8.3	5.99	2.8	1.3	0.21	0.06	0.13
BnaA07G0245100ZS	39.12	43.12	29.51	30.92	28.81	29.53	25.65	23.11	25.75	37.03	68.25	80.34	43.2	50.82	49.1	4.9	59.94	32.02	41.32	49.43	34.28	31.56	30.9
BnaC06G0268800ZS	35.38	32.56	22.15	21.55	21.77	23.05	20.69	21.24	18.25	32.32	64.8	73.21	43.85	47.88	53.06	4.41	49.8	23.77	32.74	44.74	32.14	35.96	39.74
BnaA07G0223700ZS	0.01	0.04	0.29	0.46	0.19	0.36	0.39	0.44	0	0	0.18	118.24	25.72	10.35	5.76	485.22	0.29	0	0.01	0	0	0.04	0.01
BnaC06G0240900ZS	0.05	0.02	0.29	0.37	0.23	0.38	0.38	0.53	0	0	0.3	116.84	27.84	10.5	6.34	508.1	0.33	0	0	0	0	0	0.08
BnaA06G0001200ZS	2.85	1.81	1.46	1.29	1.14	1.65	1.56	1.84	1.43	1.25	1.75	1.38	2.12	1.99	1.36	0.34	1.84	0.83	1.07	1.64	1.23	1.16	0.97
BnaC09G0204100ZS	0.07	0.04	0.14	0.05	0.05	0.16	0.24	0.16	0.16	0.1	0.35	0	0.09	0.05	0	0.03	0.24	0.05	0.04	0.06	0.03	0	0.15
BnaA02G0243800ZS	10.49	7.63	4.65	4.83	5.12	5.91	5.48	9.17	6.57	8.18	13.62	8.24	6.39	8.45	7.24	0.77	13.32	8.15	14.66	9.34	7.26	11.01	12.92
BnaA07G0226400ZS	19.53	13.21	5.44	5.57	6.54	7.44	6.99	10.03	8.97	9.21	19.49	12.58	8.19	10.47	9.18	0.8	16.91	8.49	11.13	10.16	8.97	11.79	12.19
BnaA07G0390100ZS	5.62	3.06	2.06	2.38	2.68	2.91	2.53	3.02	2.54	2.54	4.03	2.65	0.42	0.59	0.48	0.05	5.56	3.13	5.08	4.99	3.09	3.25	2.76
BnaC02G0327100ZS	6.9	6.18	3.92	3.46	4.09	4.32	4.3	6.21	5.37	6.21	9.07	5.55	5.91	7.96	5.2	0.94	8.58	5.45	7.87	5.56	4.94	7.18	7.75
BnaC06G0243700ZS	23.46	17.07	9.05	8.91	10.18	13.25	12.42	17.09	8.33	8.25	23.65	13.32	13.19	16.8	12.36	1.85	15.99	8.07	12.18	10.85	8.56	14.05	16.97
BnaC06G0457400ZS	8.66	4.61	2.99	2.93	3.29	3.65	3.68	4.45	3.21	3.06	6.68	3.83	2.58	2.81	3.15	0.06	8.65	5.43	7.46	7	4.65	4.98	4.69
BnaA02G0240800ZS	0	0.01	0	0	0	0	0	0	0	0	0.08	0.06	0.16	0.41	0.12	0.02	0	0.02	0	0	0.01	0.01	0
BnaA07G0227600ZS	6.24	4.8	2.18	2.1	2.46	3.13	3.27	3.75	2.99	4.28	9.98	5	1.73	1.72	0.99	0.09	7.64	3.45	3.52	5.07	3.96	5.51	4.39
BnaC02G0324200ZS	0	0	0	0	0	0	0	0	0	0	0.01	0	0	0	0	0	0	0	0	0	0	0	0
BnaC06G0245400ZS	4.8	3.4	1.14	1.04	1.14	1.42	1.23	1.82	1.53	2.05	5.39	2.51	1.09	1.21	0.83	0.01	4.49	2.36	2.26	3.19	2.68	2.96	2.24
BnaA02G0311500ZS	5.32	4.24	0.7	0.74	0.74	0.62	0.57	2.82	1.01	2.24	3.54	2.23	2.26	1.57	2.77	0.02	5.5	10.78	10.86	3.44	6.48	6.06	2.22
BnaA06G0413000ZS	8.49	6.49	5.18	6.15	6.41	4.67	5.75	3.75	3.72	3.91	5.64	3.98	0.71	1.14	0.67	0.24	10.32	2.68	4.05	5.89	5.22	4.01	1.25
BnaC02G0421700ZS	13.3	9.44	1.57	1.49	1.58	1.44	1.42	4.24	2.1	5.67	4.78	2.9	3.04	2.81	3.33	0.17	7.57	12.41	10.26	5.15	9.91	10.5	3.59
BnaC07G0263700ZS	5.87	4.87	2.56	2.89	2.53	2.3	1.79	2.31	3.17	4.44	7.61	5.77	0.46	0.67	0.91	0.27	15.79	6.57	6.88	5.9	4.44	2.33	1.43
BnaA02G0311900ZS	8.96	17.35	54.71	54.3	56.23	54.07	52.08	42.07	54.05	43.76	12.03	6.77	11.73	8.42	4.99	0.44	17.56	17.05	26.68	36.6	25.27	27.09	8.28
BnaA09G0216100ZS	0	0	0	0	0	0	0	0	0	0	0	0	0	0	0	0	0	0	0	0	0	0	0
BnaC09G0250800ZS	0	0	0	0	0	0	0	0	0	0	0	0	0	0	0	0	0	0	0	0	0	0	0
BnaC07G0264500ZS	6	12.56	35.29	33.73	36.45	39.48	42.79	40.03	44.89	32.18	6.42	3.11	22.09	17.42	8.9	2.42	8	4.65	9.51	12.01	12.1	14.14	4.65
BnaA02G0312200ZS	2.17	4.73	1.95	2.11	1.59	1.45	1.26	7.74	4.57	11.22	6.66	4.44	102.78	93.19	40.52	0.35	6.62	13.09	11.72	4.08	17.57	13.78	53.21
BnaA06G0412400ZS	14.58	18.61	20.02	17.72	18.66	21.09	23.32	133.77	33.44	12.85	11.44	3.84	7.92	7.81	10.44	7.73	7.31	250.26	164.27	3.74	39.83	45.06	33.44
BnaA09G0216200ZS	14.37	9.21	14.6	11.95	13.54	13.91	13.18	18.68	6.96	12.49	8.93	10.31	11.48	31.51	12.62	0.54	13.96	71.74	18.09	10.62	25.85	10.63	18.62
BnaC02G0423000ZS	3.76	15.2	21.77	18.51	15.5	11.38	10.29	29.02	8.33	14.76	18.64	20.45	204.26	185.77	158.68	3.46	25.36	166.29	142.25	17.18	58.58	39.7	92
BnaC07G0264800ZS	29.57	13.45	8.33	8.99	11.76	17.39	19.07	112.54	14.22	17.83	13.06	6.54	48.41	13.12	33.13	13.44	6.63	545.99	307.77	4.66	116.19	266.31	261.03
BnaC09G0251000ZS	12.6	12.84	31.6	29.64	26.22	28.42	20.52	33.2	4.41	12.99	14.7	14.42	78.17	118.35	156.16	1.41	13.76	131.37	39.82	21.07	36.35	15	18.94
BnaA02G0313600ZS	10.94	12.76	43.12	45.98	44.8	40.89	47.61	45.09	28.77	71.15	10.89	33.4	16.18	8.96	8.51	121.16	13.24	29.11	39.06	49.57	42.67	39.46	26.36
BnaA06G0411500ZS	0.17	0.32	0.71	1.07	1.11	1.01	1.62	1.36	3.72	1.9	0.06	0.37	0.18	0	0	0.13	0.27	0.44	0.27	0.25	0.5	1.25	0.12
BnaC02G0424600ZS	4.25	6.04	30.71	32.74	33.26	26.74	29.86	26.03	33.21	62.66	8.14	29.28	11.55	7.97	7.39	103.26	11.27	13.78	15.21	23.41	25.87	34.12	26.95
BnaC07G0265900ZS	0.18	0.51	1.09	0.95	1.37	0.97	0.43	1.73	0.43	1.46	1.12	1.23	15.17	9.24	7.92	1.99	0.27	2.63	6.47	2.36	2.54	1.69	8.17
BnaA07G0339400ZS	17.48	59.72	1.4	1.13	1.08	1.05	0.37	0.18	1.32	4.2	16.9	3.2	0.02	0.04	0.03	0.11	11.16	1.77	2.17	1.35	2.24	0.75	0
BnaC02G0277900ZS	9.5	21.48	0.47	0.61	0.35	0.52	0.35	0.46	0.37	1.01	4.37	1.37	1.17	0.54	0.39	0.04	3.17	0.88	4.27	0.75	1.21	0.65	0.05
BnaA02G0314300ZS	3.89	13.53	15.26	15.44	14.53	17.64	11.09	8.16	7.84	40.04	2.65	6.67	2.87	6.8	6.6	1.05	0.97	3.35	4.05	1.23	0.64	1.5	1.87
BnaC02G0425700ZS	6.74	18.33	12.39	12.23	11.79	16.99	11.52	7.85	6.73	28.96	2.99	1.04	1.55	1.58	2.14	0.21	1.21	0.92	0.96	0.45	1.09	0.8	0.11
BnaA09G0629800ZS	0	0	0	0	0	0	0	0	0	0	0.45	5.86	0	0	0	0	0	0	0	0	0	0	0
BnaC08G0487400ZS	0.02	0	0.01	0.02	0.05	0	0	0	0	0	0.34	0.19	0	0	0	0	0.03	0	0	0	0	0	0
BnaA09G0218400ZS	150.57	116.05	63.27	60.87	60.31	57.45	41.99	37.7	53.94	49.59	32.56	29.58	1.74	3	5.14	2.57	76.62	28.5	32.34	47.04	31.78	11.74	1.81
BnaC09G0254100ZS	130.66	71.74	43.56	39.66	38.21	33.46	25.74	20.16	43.11	39.36	18.17	15.33	1.89	2.92	4.79	0.54	36.92	14.18	15	31.91	20.72	6.85	1.04
BnaA06G0405800ZS	2.23	1.4	1.22	1.04	1.24	1	1.03	1.41	2.51	7.41	5.22	1.9	4.27	8.66	3.89	0.32	3.44	4.23	2.23	3.75	2.4	3.02	3.25
BnaC07G0273800ZS	2.38	2.14	2.29	2.44	2.56	2.26	3.15	3.05	1.92	6.02	4.85	2.55	1.69	3.33	1.8	0.18	3.18	3.43	2.06	2.48	2.4	1.51	1.77
BnaA06G0401100ZS	0	0	0	0	0	0	0	0	0	0	0	0	0	0	0	0	0	0	0	0	0	0	0
BnaC07G0280400ZS	0	0	0	0	0.03	0	0	0	0.12	0.47	0.2	0.17	0	0	0	0	0.05	0	0	0	0	0	0
BnaA06G0400500ZS	10.27	9.16	7.24	7.56	7.65	9.1	9.2	20.87	4.02	6.28	10.38	140.58	42.81	27.4	25.19	547.28	13.1	9.97	15.75	14.92	14.43	18.73	25
BnaC07G0281300ZS	13.21	8.99	5.24	5.78	4.85	6.7	6.94	11.02	3.73	6.24	9.18	130.61	55.35	28.6	21.74	537.95	11.44	6.44	8.05	10.61	8.75	8.5	8.34
BnaA06G0400200ZS	7.06	3.48	3.94	4.59	4.19	4.64	5.83	6.7	3.54	5.47	6.63	3.98	2.67	2.67	2.44	0.43	5.93	4.28	4.39	5.9	6.04	5.89	4.52
BnaC07G0281500ZS	6.17	3.47	2.63	2.88	2.71	3.38	4	6.38	4.57	5.84	6.75	4.24	2.28	2.53	3.2	0.37	5.62	3.63	4.35	5.29	5.64	4.94	5.98
BnaA06G0400100ZS	13.99	7.95	4.34	4.67	3.4	3.81	4.5	5.33	4.49	3.11	9.34	16.89	4.59	3.85	2.67	26.54	8.83	3.55	5.27	3.55	3.48	3.41	3.85
BnaA09G0222900ZS	0.36	0.59	1.57	1.46	1.77	1.28	1.96	2.01	1.39	1.08	0.7	21.51	2.46	1.76	0.9	34.44	1.52	0.56	0.84	1.21	1.07	1.96	0.74
BnaC07G0281600ZS	3.7	2.69	1.56	1.17	1.49	1.32	1.8	2.01	1.8	1.81	4.68	16	2.92	2.76	1.61	27.81	5.12	1.48	1.99	1.76	0.9	1.52	1.3
BnaC09G0259500ZS	1.24	0.88	1.29	1.2	1.27	1.5	1.66	2.5	0.87	0.65	1.98	25.34	6.72	7.72	7.86	109.04	1.59	1.83	2.76	2.31	1.85	2.85	5.06
BnaA09G0223100ZS	22.15	18.72	17.6	15.29	16.89	17.67	17	16.79	13.51	11.25	34.51	23.47	14.37	14.54	12.25	3.59	25.06	11.05	17.94	13.41	13.79	16.39	11.7
BnaC09G0259800ZS	10.7	8.24	6.13	6.58	6.7	7.55	6.59	8.47	5	4.13	17.13	11.59	5.82	7.2	6.74	0.72	14.35	6.39	8.93	7.17	6.51	5.68	3.54
BnaA09G0225800ZS	0.06	4.32	0.55	0.39	0.31	0.16	0.34	0.22	0.14	0.21	3.9	1.52	1.14	0	0	0	13.04	19.57	10.73	17.97	7.93	13.35	0.48
BnaC09G0263400ZS	14	30.2	8.13	6.18	6.63	12.7	13.7	13.94	0.42	0.64	1.36	0.14	0	0	0.18	0	1.35	1.67	1.44	1.54	2	4.88	2.44
BnaA06G0395900ZS	27.64	25.42	18.97	20.54	21.32	21.55	19.19	20.05	10.72	9.85	43.4	26.26	23.7	41.16	32.27	2.64	28.65	14.62	16.45	16.44	15.47	12.46	14.17
BnaC02G0444400ZS	14.28	9.64	5.18	5.48	5.81	7.32	6.72	10.36	16.56	11.9	10.72	7.25	8.34	11.38	8.48	0.37	12.73	10.6	10.69	12.12	13.97	11.06	9.45
BnaC07G0287500ZS	9.47	8.01	9.28	9.53	9.48	8.75	8.5	8.11	4.98	4.49	20.81	10.83	9.78	14.04	10.81	1.29	12.77	5.93	7.11	4.89	5.57	3.62	5.57
BnaA07G0057800ZS	0	0	0	0	0	0	0	0	0	0	0	0	0	0	0	0	0.75	0	0	0	0	0	0
BnaC07G0087200ZS	0	0	0	0	0	0	0	0	0	0	0	0	0	0	0	0	1.14	0	0	0	0	0	0
BnaA09G0127300ZS	0.98	0.98	0.14	0.11	0.28	0.37	0.23	0.23	0.13	0.2	0.01	0.05	0	0	0	0	0.46	0.21	0.19	0.23	0.15	0.08	0.02
BnaC09G0134200ZS	1.16	0.9	0.15	0.12	0.08	0.25	0.18	0.16	0.07	0.17	0.02	0.01	0.06	0	0.03	0	1.01	0.26	0.33	0.23	0.18	0.08	0.01
BnaA07G0055300ZS	2.63	3.65	3	3.22	2.74	3.24	3.3	4.09	2.95	3.44	4.54	4.62	4.19	4.4	3.3	3.67	4.73	2.89	2.8	5.37	5.2	6.03	3.62
BnaC07G0081000ZS	2.89	2.48	1.95	1.48	2.26	2.26	2.84	3.83	2.81	2.64	4.2	3.15	5.9	6.24	5.19	1.11	4.02	1.99	1.87	3.43	4.11	4.47	3.76
BnaA03G0389500ZS	34.53	22.89	9.17	10.34	14	18.84	13.82	73.39	29.74	19.96	11.06	26.77	16.96	5.59	9.34	7.79	31.25	192.64	333.74	27.14	64.78	78.85	59.87
BnaC03G0482200ZS	30.86	21.52	12.49	11.55	17.58	23.51	18.19	59.18	18.58	19.57	15.77	41.9	65.57	22.47	31.3	4.17	30.91	94.47	169.88	37.46	48.65	60.55	51.26
BnaA07G0054600ZS	0.42	0.08	0.08	0.05	0.04	0.04	0.09	0.05	0.05	0.26	1.35	0.3	0.09	0	0	0	0.62	0.04	0.02	0.08	0.07	0.02	0
BnaC07G0080200ZS	0.48	0.42	0	0	0.02	0	0.03	0.04	0.06	0.15	0.69	0.23	0	0	0	0	0.17	0.04	0.08	0	0.06	0	0
BnaA07G0054300ZS	12.73	12.14	9.54	8.97	10.95	12.55	12.56	14.77	7.37	7.26	16.04	11.87	16.59	20.22	18.77	1.26	11.77	6.67	7.06	9.51	11.43	11.01	12.13
BnaC07G0079900ZS	11.51	15.45	40.3	39.19	35.92	31.49	26.71	26.05	111.83	97.2	11.06	7.99	11.2	9.8	11.46	4.67	21.83	27.33	26.65	24.44	15.32	14.34	15.33
BnaA05G0440200ZS	11.25	7.07	3.42	3.2	3.81	3.85	3.87	5.67	4.88	6.25	16.28	7.18	5.41	7.96	4.19	0.58	11.94	4.8	5.95	5.74	4.56	6.54	7.84
BnaC05G0501900ZS	11.44	6.9	3.82	3.9	4.43	5.35	5.5	8.71	5.16	5.54	15.23	6.35	7.35	9.43	5.14	0.66	10.81	4.94	6.2	6.03	5.41	8.26	12.36
BnaA09G0104200ZS	0.07	0.43	0	0	0	0	0	0	0	0	0	0	0	0	0	0	0	0	0	0	0.07	0	0
BnaC09G0105000ZS	0.3	0.26	0.21	0.24	0.47	0.12	0.23	0.27	1.01	0.11	1.29	0.42	0.07	0.18	0.03	0	1.49	0.68	0.46	0.39	0.2	0.13	0.08
BnaA07G0048600ZS	0	0	0	0	0	0	0	0	0	0	0	0	0	0	0	0	0	0	0	0	0	0	0
BnaC07G0077700ZS	0	0	0	0	0	0	0	0	0	0	0	0	0	0	0	0	0	0	0	0	0	0	0
BnaA07G0047900ZS	4.97	6.01	5.79	5.67	7.3	12.07	15.73	40.72	4.2	2.39	4.08	2.78	9.17	7.57	5.7	0.53	5.21	4.36	14.24	7.19	6.98	27.33	26.88
BnaC07G0077400ZS	6.22	7.15	5.62	6.14	7.44	13.78	17.87	50.2	5.04	2.45	3.48	2.06	7.45	4.97	3.81	0.05	4.47	5.12	23.23	8.7	6.81	33.91	39.32
BnaA08G0040600ZS	0	0	0	0	0	0	0	0	0	0	0	0	0	0	0	0	7.37	0	0	0	0	0	0
BnaC08G0050000ZS	0	0	0	0	0	0	0	0	0	0	0	0	0	0	0	0	0.43	0	0	0	0	0	0
BnaA03G0393100ZS	0	0	0	0	0	0	0	0	0	1.54	0.59	0	0	0	0	0	0	0	0	0	0	0	0
BnaC03G0486700ZS	0	0	0	0	0	0	0	0	0	0.27	0	0	0	0	0	0	0	0	0	0	0	0	0.1
BnaA07G0046700ZS	7.54	6.2	3.25	2.71	3	3.28	3.87	4.36	2.72	3.35	4.46	5.35	8	11.5	9.58	2.68	8.2	5.85	5.75	6.49	6.2	7.87	8.02
BnaC07G0076900ZS	7.15	5.77	3.58	3.52	3.43	4.29	3.57	4.94	2.5	2.75	3.56	4.77	5.14	6.02	4.59	2.88	6.42	7.62	5.35	6.66	7.23	7.96	5.96
BnaA03G0393500ZS	10.64	17.21	8.21	8.33	11.39	14.9	24.37	81.57	17.78	16.05	5.48	24.54	62.48	3.54	3.65	24.45	24.77	11.11	32.3	30.02	28.54	133.17	130.53
BnaA09G0105100ZS	13.88	19.3	9.48	10.54	13.43	21.04	30.87	136.2	66.88	31.76	11.96	17.45	114.01	17.45	16.43	2.68	28.51	15.96	50.01	17.98	24.17	99.46	86.56
BnaC09G0106200ZS	9.29	14.29	13.14	14.73	16.38	24.1	36.2	133.22	48.27	27.11	11.26	14.62	109.07	17.63	16.61	1.66	17.16	6.08	18.17	15.48	17.26	62.6	65.19
BnaC03G0487200ZS	11.12	17.58	14.54	12.73	17.54	19.98	27.76	79.69	25.85	23.59	7.98	18.39	58.45	6.25	7.47	14.47	32.43	17.42	33	34.11	32.61	108.46	91.06
BnaC03G0491800ZS	0.29	0.13	0.66	0.9	0.43	0.84	1.11	2.12	0.01	0.02	0.23	219.68	47.1	18.04	9.98	821.41	0.36	0.02	1.29	0.44	0.07	0.29	0.15
BnaA03G0396300ZS	39.83	19.9	35.36	45.25	38.59	51.74	79.36	48.05	17.2	73.13	1.98	0.65	72.03	119.97	52.5	0.25	27.55	130.4	239.24	689.77	254.94	141.6	35.97
BnaC03G0491900ZS	6.15	3.09	0.51	0.85	1.22	2.54	4.36	3.5	0.47	2.87	2.05	0.43	181.96	164.24	163.01	2.41	17.34	22.01	112.87	489.34	134.63	40.54	44.57
BnaA07G0036100ZS	3.75	7	31.68	28.38	28.48	24.72	11.84	8.66	9.71	14.61	13.07	4.8	7.29	3.67	6.98	0.08	35.97	36.32	37.55	13.13	2.08	0.81	0.51
BnaA09G0109400ZS	2.17	2.22	26.74	23.76	23.98	14.22	3.66	2.99	4.3	3.72	18.65	4.85	2.53	4.98	2.96	0.19	38.36	19.01	24.12	3.35	0.25	0.7	0.68
BnaC07G0063300ZS	0.7	0.75	4.51	3.23	3.18	2.16	1.58	2.27	6.82	9.82	5.25	1.53	2.59	1.07	2.1	0.13	7.93	4.97	4.95	1.06	0.25	0.29	0.13
BnaC09G0111400ZS	1.79	4.01	25.04	21.5	21.19	10.23	2.5	1.25	4.02	3.24	18.07	8.4	1.92	3.12	2.06	0.09	44.1	16.06	21.49	2.51	0.06	0.19	0.25
BnaA03G0401800ZS	0	0	0	0.01	0	0	0	0.01	0	0	0	1.45	0.28	0.16	0.02	3.6	0	0	0	0	0	0	0
BnaC03G0501500ZS	0	0	0	0	0	0	0	0	0	0	0	0.63	0.17	0.26	0.07	0.98	0	0	0	0	0	0	0
BnaA07G0030000ZS	0.78	1.21	0.86	1.23	1.21	0.87	0.82	1.41	0.91	0.48	5.58	0.49	0.54	1.14	0.31	0.06	3	3.29	2.33	3.34	1.94	2.23	2.54
BnaA09G0111000ZS	7.6	3.94	1.5	1.81	2.09	2.2	2.12	4.37	2.4	1.93	10.44	2.95	1.76	3.1	0.76	0.4	5.08	2.53	4.12	3.71	3.02	4.74	6
BnaC09G0113300ZS	8.98	4.72	2.71	2.61	2.94	2.51	2.82	5.13	2.73	3.3	17.22	4.06	1.35	3.44	0.88	0.17	6.72	3.8	5.24	6.35	5.08	7.29	14.29
BnaC07G0054900ZS	0.92	0.56	0.14	0.09	0.05	0.07	0.17	0.15	0.15	0.41	0.95	0.93	0.02	0.1	0.03	0.93	1.14	0.26	0.37	0.72	0.52	0.47	0.49
BnaA09G0112000ZS	2.86	2.3	1.43	1.6	1.81	2.22	2.4	1.98	0.77	1.51	2.16	1.88	1.29	1.62	1.24	0.82	2.1	1.37	1.31	2.2	1.77	2.09	2.08
BnaA06G0314000ZS	0	0	0	0	0	0	0	0	0	0	0.33	0.58	0	0	0	0.74	0.02	0	0	0	0	0	0
BnaA09G0115200ZS	0	0	0	0	0.01	0	0	0	0	0	0	1.3	0	0	0	1	0	0	0	0	0	0	0
BnaC09G0118400ZS	0	0.01	0	0	0	0	0	0	0	0	0	0.83	0	0	0	0.09	0	0	0	0	0	0	0
BnaA07G0022100ZS	0	0	0.05	0.39	0.14	0.04	0.03	0.02	0.04	0.01	0.71	0.31	0	0	0.03	0	0.09	0	0	0	0.07	0.11	0
BnaC07G0043300ZS	0	0	0	0	0.01	0	0	0.02	0	0	0.01	0	0	0	0	0	0	0	0	0	0	0	0
BnaA07G0021700ZS	30.01	30.19	66.44	65.89	74.21	77.73	71.68	36.12	75.28	54.07	18.88	21.74	5.81	6.64	5.28	3.43	20.02	2.97	10.1	21.16	10.71	6.57	2.69
BnaA09G0115600ZS	265.37	242.9	104.55	103.31	119.86	163.12	170.97	114.37	80.69	92.3	77.65	158.24	60.12	58.53	55.09	8.28	59.73	50.9	62.01	103.11	76.11	48.04	27.26
BnaC09G0119000ZS	150.88	148.18	75.99	74.22	85	111.21	98.39	78.86	114.12	87.51	52.35	69.25	66.92	73.23	55	4.12	39.76	25.76	29.98	43.29	27.62	26.84	11.05
BnaA09G0117500ZS	29.85	23.12	14.79	14.74	15.38	14	12.71	15.38	6.85	15.66	49.35	26.38	16.8	26.61	14.13	8.01	28.3	70.65	21.05	17.57	37.26	39.33	46.65
BnaC09G0121800ZS	32.18	25.29	14.98	14.88	15.08	12.74	13.49	16.56	6.63	13.29	50.36	28.52	33.68	49.4	26.66	6.31	29.41	39.22	19.97	19.78	33.79	35.34	39.22
BnaA07G0017800ZS	0.02	0.11	0.16	0.09	0.09	0.08	0.1	0.05	2.02	1.68	0.67	0.06	0.03	0	0	0	0.17	0.03	0.13	0.07	0.01	0.02	0
BnaA09G0118200ZS	0	0.22	0.01	0.11	0.08	0.22	0.07	0.06	0.2	0.35	0.16	0.03	0	0	0	0	1.06	0.24	0.06	0.17	0.18	0.13	0.22
BnaC07G0037300ZS	0	0.03	0.2	0.17	0.11	0.06	0.04	0.02	2.94	1.56	0.93	0.2	0	0.05	0	0.15	0.41	0	0.05	0	0.03	0.04	0
BnaC09G0122900ZS	0.02	0.29	0.02	0.16	0.08	0.22	0.04	0.07	0.34	0.23	0.16	0.03	0	0	0	0	0.52	0.03	0.01	0.03	0.42	0.1	0.01
BnaC08G0462300ZS	35.07	23.47	10.88	10.92	11.7	12.38	11.69	11.14	11.62	12.77	34	16.09	6.94	8.03	7.49	1.6	30.76	14.37	15.29	14.54	12.55	8.27	9.94
BnaA09G0608600ZS	34.68	18.27	6.22	4.74	5.68	6.63	5.16	5.27	10.95	12.3	32.91	14.25	8.62	12.99	9.88	1.39	24.71	12.57	13.98	13.57	8.83	3.58	4.99
BnaA07G0010000ZS	2.5	1.71	0.95	0.99	0.97	0.81	0.67	1.34	3.35	1.85	6.87	3.66	0.72	1.12	0.91	0.06	6.91	7.04	10.6	2.09	3.96	1.87	1.54
BnaA09G0122500ZS	0	0.11	0	0.18	0	0.08	0	0	0	0.48	2.71	0.15	0.29	0.04	0	0	0.18	0.21	0.06	0	0.05	0.06	0
BnaC07G0023000ZS	1.54	1.92	0.56	0.36	0.36	0.41	0.28	0.47	1.24	2.85	4.73	1.55	0.71	0.64	0.85	0.2	4.7	27.88	10.6	1.94	10.32	9.38	6.05
BnaC09G0128400ZS	0	0	0.11	0	0.15	0.05	0.04	0.15	0	0	0.28	28.68	6.22	2.06	1.07	95.37	0	0.05	0	0	0	0.13	0
BnaA07G0008900ZS	0	0	0	0	0	0	0	0	0	0	0	21.64	0	0	0	0.09	0	0	0	0	0	0	0
BnaA09G0126000ZS	0	0.04	0	0	0	0.03	0	0	0	0.03	0	5.14	0	0	0	4.15	0	0	0	0	0	0	0
BnaC09G0132400ZS	0	0	0	0	0	0	0	0	0	0	0	15.1	0.64	0.07	0.13	8.43	0	0	0	0	0	0	0
BnaA09G0126200ZS	8.53	4.72	1.89	2.32	2.6	1.79	1.95	5.06	12.18	8.54	9.9	3.95	1.84	2.54	1.56	0.27	5.36	6.51	6.24	6.11	8.28	3.65	6.05
BnaA03G0119400ZS	0.68	1.23	0.33	0.31	0.27	0.16	0.07	0	5.99	4.95	16.35	1.65	0	0	0.08	0.02	5.69	0.46	0.38	0.14	0	0.03	0.14
BnaC03G0138300ZS	4.24	3.75	1.76	2.22	0.68	0.54	0.04	0.05	12.2	9.72	25.72	4.76	0.09	0.04	0	0	29.87	5.4	3.82	2.89	0.45	0	0.04
BnaA04G0138500ZS	0.03	0	0	0	0	0	0	0	0	0	0	0.25	0	0	0.03	0.08	0.33	0	0	0	0	0	0
BnaA09G0599100ZS	0	0	0	0	0	0	0	0	0	0	0.05	0	0	0	0	0	0	0	0	0	0	0	0
BnaC08G0452900ZS	0.5	0	0	0	0	0	0	0	0.03	0.17	0	0.07	0	0	0	0	0	0	0	0	0	0	0
BnaA04G0139200ZS	0	0.16	2.85	2.68	2.23	0.89	0.61	0.06	0.02	0	0.03	3.05	0.07	0	0.02	0.28	0.06	0.05	0.15	0.63	0.08	0	0
BnaC04G0429700ZS	0	0	0.03	0	0.02	0	0	0	0.01	0.02	0.06	2.13	0.11	0.06	0.05	0.39	0.01	0	0	0	0	0.01	0.01
BnaA04G0140100ZS	29.32	13.93	2.35	2.22	1.78	1.03	1.94	7.15	0.89	2.46	3.74	1.07	39.84	40.06	35.6	0.56	156.35	59.39	81.88	234.23	123.73	41.31	73.73
BnaC08G0450300ZS	245.57	67.17	7.8	8.5	6.01	9.19	15.33	46.84	4.77	11.45	75.21	15	249.81	98.89	118.74	0.41	354.35	190.32	279.53	419.64	232.35	154.94	220.82
BnaA09G0596800ZS	2.5	2.31	2.63	2.63	2.71	2.46	3.58	3.02	3.41	4.38	3.68	1.79	1.5	1.43	0.79	0.22	4.33	3.33	3.5	4.67	3.64	4.38	2.75
BnaC08G0449600ZS	6.42	5.93	5.58	5.64	6.09	6.21	6.12	5.21	7.34	9.12	6.93	4.44	4.59	3.81	2.36	0.16	8.47	5.66	5.79	8.58	5.71	6.4	3.97
BnaA06G0428000ZS	3.58	3.51	0.99	0.97	1.07	0.84	0.88	1.07	2.11	3.23	10.21	4.82	0.95	2.72	0.61	0.06	9.69	2.4	2.64	3.4	2.22	1.72	1.35
BnaC03G0674900ZS	7.2	7.99	3.4	3.83	4.2	3.43	3.38	3.79	4.2	8.46	30.45	11.85	0.45	1.09	0.51	0.32	26.67	5.24	6.18	5.24	3.01	3.59	2.15
BnaA04G0141500ZS	49.56	34.83	35.93	36.68	35.66	32.67	32.07	40.91	50.25	34.48	71.49	77.66	88.82	90.81	108	4.53	78.6	38.19	48.7	49.17	51.42	37.4	48.55
BnaA09G0596100ZS	83.77	61.3	41.03	42.71	45.29	44.66	42.93	52.35	57.45	45.28	86.48	87.42	72.85	87.46	127.43	3.89	103.94	47.49	67.88	64.83	66.86	45.98	69.84
BnaC08G0448900ZS	66.9	45.71	37.18	36.05	35.13	33.93	34.23	42.14	35	32.46	85.56	90.7	57.28	68.62	94.07	5.06	94.62	39.96	54.26	53	56.39	38.78	39.8
BnaC04G0431900ZS	58.13	54.54	43.96	46.65	50.48	47.87	44.67	50.35	57.85	40.67	70.85	70.36	95.82	92.05	102.91	4.69	97.72	46.09	56.97	55.43	63.3	54.19	61.86
BnaA04G0143400ZS	26.03	26.42	4.63	4.34	4.11	4.16	1.98	2.61	7.43	17.06	10.56	11.51	8.2	6.71	8.56	0.05	17.21	8.07	13.7	8.27	3.9	0.68	0.3
BnaA09G0594500ZS	33.29	27.24	8.38	8.37	8.52	10.11	8.48	8.1	9.81	16.27	8.09	9.32	5.12	4.62	6.93	0.22	14.19	13.17	20.93	20.53	11.9	5.74	5.45
BnaC08G0447200ZS	40.93	29.95	13.49	13.79	14.11	16.6	13.3	11.58	11.62	19.53	10.72	12.97	7.7	7.05	9.61	0.49	16.69	18.04	25.53	26.9	15.35	7.47	6.3
BnaC04G0433800ZS	17.86	15.61	3.93	3.31	3.37	2.41	1.01	0.87	7.09	14	8.77	8.34	3.31	2.88	3.79	0.01	15.38	8.04	10.7	7.8	3.09	0.36	0.11
BnaC04G0436600ZS	9.75	7.04	5.97	5.94	5.96	6.41	6.9	7.52	4.94	4.21	9.72	5.12	3.52	4.97	4.57	1.37	9.58	3.74	5.17	8.48	8.11	5.3	5.17
BnaA04G0145300ZS	7.77	6.19	4.41	3.65	4.11	4.2	3.91	4.69	4.36	5.53	12.86	5.08	3.38	3.04	2.98	0.43	11.03	5.17	5.43	6.28	7.2	6.58	3.45
BnaA04G0147200ZS	32.11	19.14	24.74	23.13	24.88	27.95	25.13	17.74	24.65	18.59	1.75	0.69	2	1.73	1.69	0	0.8	0	0.09	0.09	0.15	0	0
BnaA09G0591400ZS	32.37	21.7	16.59	15.85	16.93	19.57	21.16	22.42	15.92	12.65	1.64	0.83	0.74	0.47	6.58	0	1.38	0.69	0.62	0.78	0.95	1.37	0.38
BnaC04G0438900ZS	52.42	38.59	56.6	56.5	60.05	62.9	58.51	54.85	79.44	71.6	2.44	3.36	3.7	1.83	1.77	0.07	7.8	17.83	9.65	14.7	23.19	16.77	0.58
BnaC08G0443200ZS	26.18	17.26	5.3	4.67	5.15	11.41	10.89	8.7	5.08	4.06	2.03	1.3	0.17	0.98	3.42	0	0.53	0	0.06	0.02	0	0	0
BnaA03G0241000ZS	5.42	5.64	2.26	2.32	2.27	3.18	3.31	2.43	1.78	1.96	10.45	2.71	0.56	0.63	0.86	0.08	5.06	4.08	1.83	2.44	1.96	0.95	0.54
BnaA09G0589000ZS	0	0	0	0	0	0	0	0	0	0	0.01	15.38	0.04	0.03	0.02	0.8	0	0	0	0	0	0	0
BnaC08G0440400ZS	0	0	0	0	0	0	0	0	0	0	0.01	10.27	0	0	0	0.25	0	0	0	0	0	0	0
BnaA04G0152100ZS	25.15	20.5	10.42	10.12	11.24	14.94	15.79	18.04	17.72	18.63	18.43	22.7	20.75	23.92	17.78	32.44	17.87	10.63	15.48	13.32	11.76	17.18	21.28
BnaA09G0588800ZS	21.27	19.15	10.33	9.86	10.39	12.49	11.09	13.41	16.64	22.22	18.99	29.01	20.93	20.82	15.13	53.82	15.6	9.62	12.31	9.52	9.43	13.86	13.39
BnaC04G0444500ZS	20.73	15.5	9.25	9.07	9.1	11.62	13.28	15.04	12.05	16.79	16.08	22.54	20.65	19.86	18.55	50.36	15.15	9.69	11.32	14.43	13.72	18.04	19.77
BnaC08G0440200ZS	22.6	21.14	12.68	14.56	12.61	16.01	15.53	16.22	18.12	21.7	19.51	34.11	25.79	25.21	22.86	70.54	14.39	9.93	13.65	12.26	12.58	17.66	13
BnaA09G0588000ZS	8.61	7.61	3.81	3.5	3.81	5.08	5.27	5.5	2.46	4.6	8.72	6.68	5.71	7.77	6.64	4.95	6.75	3.69	4.6	6.5	4.73	5.88	6.39
BnaC08G0439500ZS	7.31	7.54	4.75	4.59	4.73	5.9	6.65	9.56	3.84	5.79	9.37	6.17	9.52	10.99	10.95	3.38	7.82	4.28	5.44	4.81	4.11	6.76	5.68
BnaA04G0153700ZS	71.33	70.77	2.85	2.29	2.37	2.76	1.48	0.76	1.73	2.92	5.37	1.86	0.29	0.25	0.21	0.05	3.18	5.09	9.9	10.11	10.4	0.39	0.04
BnaA09G0586900ZS	3.39	3.36	0.22	0.08	0.2	0.07	0.03	0.02	0.21	0.23	1.07	0.53	0.02	0.07	0.02	0.02	2.35	0.52	0.5	0.36	0.05	0.01	0
BnaC04G0446800ZS	62.82	65.43	1.26	1.39	1.44	1.37	1.12	1.03	0.94	2.94	3.98	2.02	0.3	0.22	0.15	0.01	4.77	6.03	8.85	11.48	13.61	1.11	0.12
BnaC08G0438400ZS	5.3	3.71	0.82	0.77	0.61	0.37	0.26	0.07	0.47	1.38	3.93	2	0.03	0.01	0.14	0.04	4.88	4.83	3.36	1.87	0.98	0.07	0.11
BnaA09G0421700ZS	0	0	0	0	0	0	0	0	0	0	0	0	0	0	0	0	0	0	0	0	0	0	0
BnaA09G0526600ZS	0	0	0	0	0	0	0	0	0	0.03	0	0	0	0	0	0	0	0	0	0	0	0	0
BnaA04G0154400ZS	28.15	25.5	21.95	21.21	22.78	23.9	30.8	31.44	12.07	22.92	18.23	21.23	28.24	50.09	37.85	17.04	21.55	17.92	17.88	24.44	18.13	16.18	14.06
BnaC04G0447500ZS	25.47	20.7	11.02	10.87	11.42	14.59	12.77	15.15	6.08	11.99	13.16	24.72	36.94	54.16	44.84	34.7	15.13	9.81	9.78	16.38	12.87	11.19	5.77
BnaA09G0581100ZS	0.95	1.52	2.74	3.54	3.5	5.77	5.56	12.43	1.88	1.96	1.71	1.89	100.39	59.65	84.39	0.16	2.34	1.51	1.53	4.1	3.47	12.45	68.11
BnaC08G0433700ZS	0.58	0.03	0.79	0.59	0.68	1.32	2.13	5.28	0.45	0.48	2.14	3.25	246.94	129.15	225.51	10.36	1.07	0.03	0	0.09	0.15	2.2	45.84
BnaA04G0166400ZS	4.12	3.48	2.63	2.3	2.57	2.14	2.44	2.72	2.85	2.81	4.61	2.75	5.46	7.06	5.42	1.07	3.83	3.04	3.78	3.41	3.42	3.74	5.47
BnaC04G0463400ZS	5.3	4.82	2.94	2.45	3.09	3.48	4.17	4.06	2.74	2.71	8.32	4.07	8.93	10.58	7.88	0.75	4.98	2.25	3.3	4.29	4.52	4.03	3.82
BnaA06G0360200ZS	0	0	0	0	0	0	0	0	0	0	0	0	0	0	0	0	0.51	0	0	0	0	0	0
BnaC07G0332800ZS	0	0	0	0	0	0	0	0	0	0	0	0	0	0	0	0	1.39	0	0	0	0	0	0
BnaA09G0573800ZS	0	0.01	0.04	0.06	0.03	0.01	0.05	0.05	0	0	0.66	21.59	3.8	1.24	0.9	68.75	0.04	0	0.01	0	0	0	0.02
BnaC08G0425100ZS	0	0	0.07	0.1	0.03	0.07	0.13	0.12	0	0	0.83	24.35	5.34	2.23	1.03	89.67	0.01	0	0	0	0	0.01	0
BnaA03G0134000ZS	2.92	2.92	5.86	4.94	5.26	5.01	4.9	4.98	8.05	8.62	4.16	3.6	10	7.78	6.14	0.16	6.15	4.31	5.16	4.59	3.17	4.55	3.09
BnaC03G0155700ZS	5.37	4.75	12.12	11.85	11.91	8.52	7.71	7.07	14.63	17.15	7.04	5.39	2.93	2.32	2.06	0.17	10.57	7.19	9.5	8.19	5.53	5.78	2.33
BnaC04G0469200ZS	1.14	1.45	0.9	1.07	0.91	0.39	0.35	0.58	4.77	4.45	3.18	1.53	1.04	0.22	0.43	0	5.34	3.79	4.87	2.28	2.07	1.08	0.09
BnaC03G0526200ZS	0	0	0	0	0	0	0	0	0	0	0	0	0	0	0.04	0.08	0	0	0	0	0	0	0
BnaC08G0264400ZS	0	0.03	0	0	0	0.04	0	0	0	0	0	0	0	0	0	0	0	0	0	0	0.04	0	0
BnaA03G0272100ZS	7.18	5.45	2.67	2.32	3.05	3.03	3.79	4.23	1.3	2.74	5.09	6.14	3.96	4.86	4.24	4.95	3.57	2.61	2.4	6.48	5.65	3.6	4.63
BnaC03G0327100ZS	4.55	3.56	1.73	1.68	2.15	1.86	2.09	2.45	0.81	1.32	6	5.58	3.31	2.57	2.17	3.77	3.73	1.2	1.69	3.83	3.19	1.64	2.13
BnaA04G0172100ZS	12.94	10.36	11.32	10.89	11.85	15.33	16.16	16.2	6.2	8.35	4.76	5.2	11.04	14.92	13.66	0.24	8.08	12.08	16.5	19.63	16.76	18.43	11.95
BnaA09G0572800ZS	14.25	9.3	4.75	5.48	5.08	5.31	6.63	6.71	6.51	8.4	6.19	6.29	15.43	18.72	20.28	2.46	11.19	21.56	16.3	23.42	18.57	15.96	11.83
BnaC08G0423900ZS	15.13	14.26	9.15	9.36	10.26	11.34	12.1	13.07	6.62	9.33	7.42	6.54	14.3	16.8	20.54	3.38	11.33	29.02	15.41	17.84	22.96	18.97	16.93
BnaC04G0470000ZS	8.67	5.61	3.46	3.48	3.68	5.5	5.89	6.24	1.71	2.42	3.35	2.92	2.24	2.93	1.65	0.03	5.12	4.63	4.16	7.15	6.63	6.5	2.5
BnaA04G0174300ZS	0	0	0	0.05	0.01	0.03	0	0.05	0	0	0.07	14.28	1.68	0.41	0.43	19.07	0.01	0	0	0	0	0.02	0
BnaA09G0571000ZS	0	0	0.02	0.04	0	0.05	0.01	0.05	0	0	0	24.75	3.73	1.44	0.78	48.28	0.03	0.02	0	0	0	0	0
BnaC04G0472300ZS	0	0	0	0.01	0	0.03	0	0.02	0	0	0.05	5.49	0.91	0.25	0.19	7.15	0	0	0	0	0	0	0
BnaC08G0421400ZS	0	0	0	0.02	0	0	0.03	0.02	0	0	0.05	17.87	2.56	0.75	0.52	29.13	0.02	0.02	0	0	0	0	0
BnaA07G0152100ZS	18.76	15.15	11.9	12.92	11.93	13.18	14.65	32.45	15.95	13.67	17.97	10.44	10.7	10.46	10.32	0.34	22.63	18.22	32.4	11.68	15.56	19.37	20.04
BnaA07G0151400ZS	14.82	10.59	6.27	5.89	6.88	7.86	6.55	13.97	6.86	7.98	7.91	15.07	61.1	33.32	35.46	19.04	15.04	10.52	11.49	9.5	11.16	21.18	27.29
BnaC04G0211300ZS	16.43	13.4	8.15	8.08	8.44	8.25	9.47	11.38	13.05	12.67	8.97	14.55	48.89	30.72	30.29	6.01	14.67	7.11	9.22	10.66	10.73	15.43	18.17
BnaA03G0235700ZS	0.57	0.14	0.91	1.69	1.16	1.3	1.93	2.41	1.17	3.05	0.13	0.27	1.54	0.64	0.41	0	0.27	2.18	2.85	0.63	0.27	0.22	0.08
BnaA04G0175400ZS	6.68	6.9	0.66	0.84	0.79	0.63	19.63	30.27	3.85	36.37	3.09	4.44	89.73	83.39	84.39	0.44	4.41	95.73	103.17	12.22	54.47	109.48	183.53
BnaC03G0278500ZS	3.52	1.59	1.88	1.37	1.85	0.86	1.89	2.79	1.13	2.56	0.28	0.92	9.66	6.92	2.37	0.02	1.25	3.79	4.6	0.75	1.08	1.28	1.54
BnaC04G0473700ZS	6.93	14.95	1	1.55	1.3	1.16	17.04	16.66	3.39	35.02	5.36	3.45	219.25	164.53	173.11	0.99	9.67	175.69	131.63	17.02	63.54	156.36	364.12
BnaA07G0154600ZS	0.25	0.14	8.42	7.35	6.43	4.53	5.21	4.1	20.19	30.56	50.8	3.64	0.25	0.03	0	0	73	1.37	1.68	0.08	0	0	0
BnaC04G0207500ZS	1.15	2.44	20.14	19.97	16.07	20.78	23.59	12.58	24.26	70.92	56.29	5.93	0.05	0	0.09	0	117.23	82.49	49.4	27.13	0.57	0.05	0.05
BnaA04G0178700ZS	8.38	6.65	3.48	3.64	3.64	3.82	3.69	3.27	3.76	4.74	4.72	3.92	1.98	1.97	2.39	0.34	7.05	3.82	4.23	5.49	3.62	3.96	2.39
BnaA07G0154900ZS	17.09	14.7	10.08	10.27	10.66	11.63	10.97	12.12	5.5	7.49	11.51	13.01	11.77	12.34	14.05	1.05	12.93	9.91	9.79	12.87	11.52	11.03	8.31
BnaC04G0206900ZS	13.63	11.32	6.44	6.29	6.99	7.6	8.52	9.51	2.69	3.97	12.54	9.29	7.31	7.42	7.05	0.61	10.7	5.86	7.48	8.05	4.99	6.14	8.01
BnaC04G0477800ZS	16.82	12.29	4.85	4.24	4.94	4.66	4.47	4.17	4.47	6.92	9.91	7.06	3.08	1.85	3.08	0.04	10.98	4.88	8.71	8.64	5.69	4.67	2.27
BnaA03G0233400ZS	0.21	0	0.03	0	0	0	0	0	0	0.05	0	0.16	0	0	0.09	0.02	0	0	0	0	0.04	0	0
BnaC04G0478300ZS	6.77	0	0	0	0	0	0	0	0	3.53	0	0.12	0	0	0	0	0	0	0	0	0	0	0
BnaA07G0155500ZS	0	0.01	0	0	0	0	0	0	0	0.15	0	0	0	0	0	0	0.23	0	0	0.02	0.25	0	0
BnaC03G0275900ZS	0.68	0	0	0	0.04	0.02	0	0.04	0	0.4	0	0.08	0	0	0	0	0	0	0	0	0	0	0
BnaA03G0231000ZS	0	0	0	0	0	0	0	0	0.02	0.02	0	0.62	0	0	0	0	0	0	0	0	0	0	0
BnaA04G0184700ZS	0	0	0	0	0.03	0	0	0	0	0	1.56	10.31	0	0.37	0	0.28	0	0	0	0	0	0	0
BnaC03G0272600ZS	0	0	0	0	0	0	0	0	0	0	0.15	0	0	0	0	0	0	0	0	0	0	0	0
BnaC04G0485700ZS	0	0	0	0	0	0	0	0	0	0	1.68	8.41	0	0.56	0.24	0.08	0	0	0	0	0	0	0
BnaA04G0190800ZS	0.96	0.52	0.13	0.19	0.45	0.37	0.51	0.54	1.2	0.89	1.38	1.72	1.26	2.03	2.52	0	2.18	1.38	1	2.21	2.41	1.81	2.01
BnaA05G0139900ZS	24.91	13.43	8.06	6.6	6.94	5.3	5.51	10.95	16.35	14.6	54.69	25.99	9.47	16.35	8.64	0.56	26.09	17.57	17.43	17.96	21.77	12.07	15.31
BnaA05G0137600ZS	22.84	12.68	1.13	1.2	1.22	1.67	1.17	0.96	2.24	5.34	6.01	39.27	1.25	3.18	3.75	0.95	7.06	2.6	4.88	5.48	2.63	0.32	0.3
BnaA03G0146800ZS	0	0	0	0	0	0	0	0	0	0.11	0	0	0.04	0	0	0	0	0	0	0	0	0	0
BnaA05G0132300ZS	31.41	22.11	7.43	7.73	5.66	5.18	5.66	5.02	39.83	34.95	37.89	19.3	5.55	7.89	11.13	0.52	30.02	21.99	18.36	19.64	18.63	6.37	6
BnaC03G0171000ZS	0	0	0	0	0	0	0	0	0	0	0.55	0	0	0	0	0	0	0	0	0	0	0	0
BnaC04G0175000ZS	47.23	34.59	18.57	20.62	18.52	20.11	17.93	17.12	41.78	46.6	38.15	25.92	9.11	9.47	10.5	0.73	43.82	35.25	29.52	45.76	52.8	22.19	17.54
BnaA04G0203000ZS	0	0	0	0	0.02	0	0.07	0.05	0	0	36.21	0	0.02	0	0	0	0	0	0	0.02	0.05	0	0
BnaA05G0127900ZS	0	0	0	0	0	0	0	0	0	0	2	0	0	0	0	0	0	0	0	0	0	0	0
BnaC04G0166600ZS	0	0.02	0	0	0	0	0	0	0	0	2.91	0.14	0	0	0	0.09	0	0	0	0	0	0	0
BnaC04G0509000ZS	0	0	0	0	0	0	0.02	0	0	0	30.64	0	0	0	0	0	0	0	0	0	0	0	0
BnaA04G0203100ZS	0.02	0.13	0	0.03	0	0	0	0.02	0	0.08	44.74	0.03	0.08	0	0	0	3.89	0.4	0.29	0.38	0.17	0	0
BnaA05G0128000ZS	1.45	0.13	0.02	0.01	0.02	0.06	0.13	0.19	0.2	0.22	30.4	0.41	0.08	0.02	0.03	0.02	3.66	1.12	0.44	0.61	0.19	0	0
BnaC04G0166800ZS	1	0.02	0.09	0.13	0.11	0.22	0.25	0.48	1.01	0.95	40.98	1.55	0.13	0.16	0.16	0.37	9.22	2.99	0.6	0.54	0.66	0	0
BnaC04G0509100ZS	0.95	0.87	0.02	0.04	0.06	0.05	0	0.04	0.01	0.16	58.76	0.03	0	0	0	0	7.5	0.79	0.3	0.49	0.7	0.02	0
BnaA04G0204200ZS	13.48	8.68	4.42	4.3	4.5	5.75	5.87	10.43	9.37	10.23	10.14	6.57	7.3	6.98	5.07	5.5	10.24	9.5	12.53	12.33	10.23	14.23	20.57
BnaC04G0510200ZS	8.83	5.03	4.62	4.7	5.08	4.49	4.57	5.07	5.37	5.55	5.51	3.25	2.21	2.2	1.68	0.01	7.26	6.01	7.56	8.43	5.7	7.8	6.29
BnaA05G0122300ZS	7.74	5.95	2.54	2.35	3.17	3.01	3.1	4.84	5.03	6.2	8.69	4.67	2.81	3.13	2.34	0.56	10.27	5.85	5.83	5.45	4.46	5.95	6.5
BnaC03G0178900ZS	5.72	3.45	1.99	2.03	2.43	3.11	3.32	3.65	2.05	1.89	3.02	2.68	3.79	3.39	2.97	0.42	4.23	2.48	4.03	3.98	2.85	3.61	2.94
BnaA03G0155400ZS	10.18	9.49	0.78	0.58	0.75	0.97	0.39	0.15	3.42	3.95	6.64	1.67	0.14	0	0.05	0	18.5	3.97	4.33	2.53	0.98	0	0
BnaA05G0116000ZS	12.47	56.66	1.5	1.36	0.89	0.22	0.15	0.3	1	1.12	3.94	2.17	0.13	0.23	0.17	0	21.7	8.84	8.03	10.29	11.72	0.11	0.15
BnaC03G0181200ZS	8.6	4.21	0.45	0.1	0.19	0.14	0.06	0	1.21	2.12	7.39	4.58	0.08	0	0	0	27.06	2.15	1.12	1.44	0.21	0	0
BnaC04G0147800ZS	3.62	13.33	0.74	1.08	0.45	0.54	0.3	0.58	0.87	0.71	5.28	1.48	0.75	7.6	4.34	0.14	16.61	5.38	4.23	4.32	3.19	1.15	0.06
BnaA05G0109500ZS	0	0.01	0	0.01	0.04	0.01	0.07	0.23	0	0	0.05	0.01	0	0.01	0.02	0	0.22	0	0	0	0	0.01	0.01
BnaC04G0136900ZS	0.02	0.01	0	0	0	0	0.01	0.04	0	0	0.15	0.35	0	0	0	0.01	0.13	0	0	0	0	0.03	0
BnaA03G0160900ZS	0.34	1.16	12.45	12.38	16.06	10.6	6.19	7.57	137.89	17.69	6.17	5.76	1.55	0.19	0.23	0.03	15.48	15.66	20.74	8.91	3.51	0.76	0.21
BnaA04G0214400ZS	5.47	3.16	9.01	9.95	11.83	12.91	16.07	26.97	11.72	3.64	6.25	8.54	272.93	210.68	258.02	7.03	21.3	24.01	64.94	23.71	21	17.77	33.05
BnaC03G0187300ZS	8.65	5.67	24.74	22.82	32.38	27.9	15.09	25.73	109.47	20.32	11.46	34.87	1.77	3.99	1.5	0.26	21.33	27.86	54.09	16.08	12.28	0.69	0.45
BnaC04G0135700ZS	16.79	26.17	14.94	14.65	15.56	21.6	24.07	24.57	45.62	11.42	52.07	11.73	37.2	26.98	45.41	4.72	49.36	9.75	10.04	7.5	5.26	8.39	59.36
BnaC04G0525300ZS	91.8	24.85	38.36	40.84	46.06	57.84	56.62	92.28	137.78	40.39	93.6	55.26	388.19	480.89	501.18	22.94	158.63	97.63	198.27	187.67	135.2	43.1	220.6
BnaA03G0161500ZS	0	0	0	0	0	0	0	0	0	0	0.09	0	0.88	0.06	0.17	0.44	0	0	0	0	0	0	0
BnaC03G0188100ZS	0	0	0	0	0	0	0	0	0	0	0.28	0.75	0	0	0	0.56	0	0	0	0	0	0	0
BnaA04G0216600ZS	0	0	0	0.11	0	0	0.03	0	0	0	0	37.59	0.54	0.26	0.13	13.88	0.01	0	0	0	0	0	0
BnaC04G0527700ZS	0	0	0.05	0	0	0.12	0	0	0.03	0.02	0.03	39.1	0.49	0.27	0.09	13.15	0	0	0	0	0	0	0
BnaA04G0217500ZS	0.01	0.02	0.13	0.06	0.1	0	0.09	0.07	0.23	0	0.01	0	0	0	0	0	0.05	0	0.3	0	0.03	0.24	0.05
BnaC04G0528800ZS	0	0	0	0	0	0	0	0	0.03	0.13	0.91	167.53	1.39	0.3	5.15	0	0	0	0.06	0	0	0	0
BnaA05G0137500ZS	0	0	0	0	0	0	0	0	0	0	0	0	0	0	0	0	0	0	0	0	0	0	0
BnaA05G0105100ZS	8.56	7.55	4.79	4.75	5.19	5.85	6.72	7.64	2.81	3.4	5.35	6.54	7.92	8.93	7.94	6.29	4.83	3.16	4.18	6.27	5.22	6.21	6.7
BnaC04G0131000ZS	11.53	9.41	6.03	6.26	6.05	7.88	7.98	7.44	3.42	3.91	6.38	7.66	8.38	10.62	9.94	5.96	6.03	4.13	4.77	7.32	6.3	7.69	7.6
BnaC04G0530100ZS	12.86	12.58	0.88	0.96	1.06	1.18	1.32	1.19	1.6	2.44	9.83	3.24	0.36	1.41	0.96	0.09	3.1	0.69	1.26	2.38	1.4	1.41	1.01
BnaA05G0104800ZS	56.35	42.77	3.11	3.52	4.07	5.26	5.89	6.02	4.78	6.04	15.9	8.79	1.42	2.89	2.63	0.21	9.64	3.96	5.96	11.8	8.33	5.86	1.89
BnaC04G0130700ZS	32.3	27.72	3.2	2.98	3.31	4.15	4.76	5.3	3.21	4.58	14.76	7.62	0.72	2.89	2.05	0.35	7.61	3.41	5.34	9.38	6.06	5.18	1.48
BnaC04G0129300ZS	6.42	13.66	0.34	0.46	0.68	0.51	0.45	0.87	0.91	0.71	0.42	2.7	0.12	0.25	0.05	0.05	0.97	0.24	2.4	3.67	6.3	0.5	0.06
BnaA04G0220900ZS	0	0	0.02	0	0	0	0	0	0	0	0	0	0	0	0	0	0.02	0	0	0	0	0	0
BnaA05G0100300ZS	0.31	1.29	0.12	0.28	0.07	0.55	0.72	0.51	0.05	0.18	0.1	0.33	2.82	0.31	0.38	0.84	0.3	4.01	5.29	6.9	16.9	38.71	192.48
BnaC04G0533600ZS	1.7	0.05	0.15	0.12	0.04	0.25	0.35	0.3	0.03	0.05	0	0	0	0	0	0	0	0.01	0.03	0.01	0	0	0.02
BnaA03G0166300ZS	9.32	6.63	11.39	11.76	11.61	12.98	14.56	22.08	11.25	6.78	11.19	12.11	31.32	66.79	40.74	1.57	7.69	5.34	7.31	5.02	5.92	15.57	15.74
BnaC04G0121700ZS	11.44	19.98	52.84	50.71	54.28	41.94	31.63	19.71	28.33	92.51	13.41	7.28	6.42	15.25	7.02	0.62	17.6	18.27	16.75	24.87	12.24	6.85	7.81
BnaA05G0098800ZS	6.97	16.98	58.35	57.03	53.93	39.3	30.5	20.71	38.33	73.39	9.61	5.47	4.9	8.65	4.6	0.8	12.82	19.51	16.35	18.62	11.55	8.39	6.22
BnaA05G0097300ZS	6.55	5.56	0.77	0.59	0.62	0.49	0.05	0.21	0.27	3.87	1.14	0.83	16.61	22.79	25.14	0.01	4.05	1.37	3.1	1.81	16.28	1.72	0.07
BnaC04G0536000ZS	15.35	43.23	1.29	1.16	0.88	0.67	0.1	0.25	0.62	9.07	4.35	2.88	0.71	1.88	0.55	0.05	69.54	221.33	64.89	34.54	166.56	22.48	1.86
BnaA05G0096300ZS	0.45	0.57	0.18	0.2	0.2	0.04	0.05	0.04	0.67	0.25	1.68	0.47	0.01	0	0.01	0	4.74	1.24	0.56	0.08	0.09	0.21	0.13
BnaC04G0536900ZS	0.6	2.15	1.34	0.89	1.06	0.21	0.13	0.02	0.1	0.13	0.08	0.02	0	0	0	0	1.84	25.14	4.17	1.45	3.28	1.56	0.15
BnaA03G0170200ZS	18.92	16.3	5.63	5.47	5.95	7.11	6.41	6.13	4.8	7	7.62	11.09	6.01	7.29	6.72	9.17	10.03	8.05	9.09	9.37	6.17	5.07	7.88
BnaC03G0197300ZS	22.77	20.07	7.84	7.93	8.29	9.65	8.05	7.6	6.4	8.86	10.03	13.43	6.17	8.66	6.84	16.21	13.61	9.6	11.73	12.04	8.67	7.52	12.43
BnaA04G0227700ZS	0	0.03	0.03	0.02	0.01	0.02	0.01	0.03	0	0.01	0.03	0	0	0	0.01	0.01	0.05	0	0.01	0	0	0	0.04
BnaC04G0541900ZS	0	0.02	0	0.01	0	0	0	0	0	0	0.19	0.03	0	0	0	0.01	0.07	0	0.01	0.01	0	0	0
BnaC04G0106700ZS	0.06	0.08	0	0	0	0	0	0	0.03	0.07	0.03	0.01	0.04	0	0.02	0.01	0.32	0.02	0	0	0	0	0.05
BnaA03G0170600ZS	72.68	72.64	50.37	47.88	49.99	54.9	59.08	55.3	36.34	25.62	35.83	48.47	54.52	74.07	81.67	33.15	33.92	25	25.68	37.16	37.95	26.59	32.17
BnaC03G0197800ZS	68.73	54.82	33.14	32.7	37.36	43.3	40.5	34.45	21.24	22.77	21.48	37.13	49.91	70.58	77.27	31.51	31.06	28.75	30.28	62.97	49.99	39.91	56.36
BnaA05G0089500ZS	13.32	12.31	8.11	8.68	8.68	12.32	11.64	10.95	3.44	4.28	7.95	9.58	13.55	17.77	16.93	11.4	7.94	5.65	7.15	13.16	13.83	11.24	12.87
BnaA03G0172700ZS	63.46	39.65	31.04	29.98	29.38	32.61	28.41	32.73	9.51	10.2	5.99	9.57	52.34	57.97	65.61	3.04	17.52	25.1	25.23	44.05	39.69	25.4	32.65
BnaA04G0230500ZS	231.75	138.7	64.93	68.43	68.88	96.31	110.33	128.26	7.17	8.76	8.01	9.02	209.49	96.45	186.75	0.46	24.37	51.37	50.77	111.23	103.46	116.64	73.67
BnaA05G0089900ZS	64.53	73.32	88.86	83.84	85.68	85.44	86.71	92.83	27.67	12.69	3.88	12.03	94.16	64.21	78.45	8.62	22.5	24.64	26.73	78.03	76.73	52.51	27.69
BnaC03G0200500ZS	65.24	40.92	31.83	36.18	41.32	36.63	30.67	30.63	27.2	16.36	5.56	9.79	39.26	46.96	50.53	2.86	30.49	32.96	27.62	36.73	39.75	25.44	24.97
BnaA04G0230400ZS	190.61	99.19	40.89	40.26	42.79	65.29	73.21	86.74	10.32	7.24	4.67	5	130.15	69.79	103.53	0.23	15.62	35.73	36.81	73.59	68.1	69.68	50
BnaA09G0494500ZS	0	0	0	0.04	0.14	0.26	0	0	0.51	0.27	0.33	0.88	1.91	0.04	0.24	0	1.1	0.36	0.66	0	0	0	0.16
BnaC08G0333100ZS	0.06	0	0	0.06	0	0.06	0	0.06	0.34	0.55	0.63	0.25	0.15	0	0	0	1.48	0.2	0.41	0	0	0	0
BnaA04G0239700ZS	0.04	0	0.06	0.86	0.9	0.22	0.02	0.21	0	0.03	0.56	24.33	2.72	1.26	10.2	45.29	0.55	0	0	0	0.01	0	0.08
BnaC04G0554800ZS	0.17	0.11	0.13	0.83	1.1	0.25	0.18	0.33	0.07	0.04	0.5	22.18	2.62	0.87	5.79	107	0.74	0.02	0.04	0.06	0.04	0.14	0.14
BnaA05G0073200ZS	0.07	0.38	0	0	0	0	0.03	0.29	0.03	0	0	0	0	0	0	0	0	0.09	0.02	0.1	0.02	0.31	0.03
BnaA04G0246100ZS	8.57	5.9	2.04	1.93	2.6	2.49	1.87	3.46	2.42	3.72	8.89	6.36	2.19	1.53	3.4	0.04	9.13	5.84	14.6	5.67	5.23	5.55	6.23
BnaC04G0560900ZS	8.86	6.26	3.09	3.56	3.44	3.12	3.18	3.89	6.14	6.81	14.81	8.11	6.22	5.95	16.01	0.16	14.88	6.42	9.41	11.08	9.04	8.28	23.92
BnaA03G0184800ZS	0	0	0.04	0	0.05	0	0.04	0	0	0	0	0	0.1	0	0.31	1.41	0	0	0	0	0	0	1.54
BnaC03G0216800ZS	4.06	2.35	0.74	0.32	0.91	1.23	1.35	1.62	0.34	0.27	1.77	3.93	3.27	5.45	5.63	4.46	0.61	0.08	0.15	0.15	0.05	0.34	6.22
BnaA03G0185600ZS	4.84	3.57	2.1	2.02	2.44	2.36	2.55	3.33	4.88	3.8	14.23	4.71	0.94	0.53	0.39	5.3	6.84	4.51	2.81	3.13	4.2	4.34	6.55
BnaC03G0217700ZS	4.51	3.69	2.44	2.51	2.86	2.68	3.17	4.48	5.27	5.01	18.59	5.88	3.94	4.75	3.61	3.62	9.23	9.62	4.31	5.15	6.68	6.72	12.57
BnaA05G0070500ZS	11.53	8.05	6.78	7.21	8.17	7.76	8.82	15.76	9.86	10.96	12.79	10.93	13.71	16.41	12.11	5.74	9.79	20.49	11.07	9.42	18.54	25.33	37.86
BnaA03G0190200ZS	2.68	3.88	3.74	4.54	4.21	4.15	3.47	3.67	7.55	4.72	27.44	2.18	6.49	5.2	8.31	0.49	7.25	3.35	4.23	5.87	5.56	2.68	1.57
BnaC03G0223700ZS	7.6	10.19	17.56	18.11	18.24	17.28	14.71	13.54	26.26	21.84	26.53	3.85	4.9	6.15	13.35	1.59	21.81	17.1	20.47	23.26	19.28	12.72	5.06
BnaA05G0063500ZS	1.16	1.32	4.68	5.73	6.59	2.47	2.1	18.62	13.2	1.65	10.64	42.23	16.85	19.4	55.08	2.46	9.89	0.41	0.85	1.32	0.38	0.21	1.56
BnaC04G0069800ZS	113.67	6.41	11.89	14.03	14.47	9.59	6.81	12.82	40.77	3.51	10.38	53.33	11.95	8.37	21.41	1.81	21.78	0.54	1.62	5.96	2.57	0.54	25.83
BnaA03G0195000ZS	58.75	65.36	15.39	13.94	13.71	16.51	10.27	7.11	14	27.88	25.26	27.3	6.42	10.69	12.67	0.03	48.68	35.1	28.64	37.99	25.27	3.75	0.87
BnaA05G0062400ZS	42.17	55.46	15.82	15.38	15.67	14.23	7.6	3.49	12.19	34	40.74	49.63	6.76	8.03	8.38	0.42	53.22	25.78	18.8	28.54	13.74	2.12	1.62
BnaC03G0228500ZS	25.36	30.54	6.91	6.86	8.19	8.57	6.19	7.33	10.43	16.77	11.14	11.34	2.5	4.89	7.83	0.38	30.16	19.04	17.04	15.77	13.5	6.06	4.14
BnaA04G0252000ZS	0.32	0.64	0	0	0.02	0	0.1	0.1	0	0.12	0.23	0.13	9.57	1.77	1.08	0.23	0.16	0	0.32	0.02	0.04	0.08	15.9
BnaA05G0060900ZS	0.05	0.21	0	0.2	0.2	0.42	0.38	0.45	0	0.07	0	0	3.64	0.23	0.2	0	0	0	0.25	0	0	0.18	6.33
BnaC04G0066800ZS	0	0.32	0	0.04	0	0.04	0.04	0	0	0	0	0	6.27	0.63	0.09	0.05	0	0	0	0.05	0	0	5.6
BnaC04G0571500ZS	0.11	0.31	0.04	0.04	0.11	0	0.04	0.3	0	0.04	0.26	0.31	7.99	1.44	1.47	1.19	0	0.2	0.13	0.15	0.69	0.38	3.78
BnaA03G0201400ZS	0.03	0.02	0	0.01	0	0.01	0	0.02	0	0	0.02	16.6	0.21	0.07	0.06	5.71	0	0	0	0	0.03	0	0
BnaA05G0022700ZS	0	0	0	0.01	0	0	0	0	0	0	0	6.12	0.15	0.06	0.02	2.01	0	0	0.01	0.01	0	0.09	0.01
BnaC03G0237900ZS	0	0	0	0.01	0.01	0.01	0	0.02	0	0	0.01	14.84	0.17	0.12	0.07	4.34	0	0.01	0.01	0.03	0.03	0.01	0.02
BnaC04G0024500ZS	0	0	0	0	0.01	0	0	0	0	0	0.01	6.71	0.18	0.14	0	1.99	0	0	0	0.01	0	0.02	0
BnaA03G0202500ZS	5.94	6.15	3.8	3.95	2.96	3.02	3.47	4.34	3.09	5.05	9.75	8.93	6.79	7.02	8.27	0.53	8.96	6.8	6.39	7.35	8.24	6.82	6.7
BnaA04G0264200ZS	0.26	0.04	0.02	0	0.09	0	0	0	0	0	0	0.08	0	0.25	0.09	0	0	0	0	0.04	0.15	0	0
BnaC04G0581400ZS	0.43	0.76	0.06	0.05	0	0	0	0	0	0.04	0	0.06	0.54	0.48	0.19	0	0.24	0.06	0.17	1.32	0.7	0	0
BnaA04G0264300ZS	4.65	0.3	0.99	0.92	0.5	0.56	0.32	0.08	0.18	1.85	2.24	5.76	3	4.66	10.07	0	0.73	0	0.08	0.01	0	0.03	0
BnaA05G0023900ZS	0.12	0.01	0.61	0.61	0.2	0.41	0.7	0.87	0.03	0.13	4	0.18	0.26	0.06	0.15	0	2.52	0.04	0	0.19	0.04	0.35	0.13
BnaC04G0025700ZS	0.13	0	1.83	1.56	0.7	1.33	0.11	0.12	0.04	0.28	2.74	0.54	0.71	0.48	0.62	0.01	1.4	0.08	0.05	0.02	0.02	0.04	0
BnaC04G0581500ZS	9.69	5.46	2.51	2.6	1.23	1.4	0.4	0.16	0.03	1.61	2.66	8.21	4.07	4.71	9.25	0	0.46	0.05	0.01	0	0	0.02	0.02
BnaA09G0435600ZS	0	0	0	0	0	0	0	0	0	0	0.05	0	0	0.17	0.21	0	0	0	0	0	0	0	0
BnaC05G0227600ZS	0	0.07	0	0	0	0	0	0.87	0	0	0.52	0.05	0	0	0.79	0.31	0	0	0	0	0	0	0
BnaA04G0265200ZS	13.09	2.4	4.05	4.13	5.83	7.38	5.16	8.88	15.48	26.01	1.51	3.33	11.1	1.36	4.62	0	6.74	16.28	17.32	13.69	15.93	13.47	19.69
BnaA05G0024800ZS	64.03	56.33	5.35	4.24	4.28	5.54	2.63	1.91	8.83	38.94	12.02	15.3	0.29	0.5	0.78	0.13	41.97	77.51	58.37	77.07	107.92	7.13	2.34
BnaC04G0026400ZS	30.73	34.74	5.14	4.65	4.51	5.13	2.41	2.09	4.58	25.36	4.25	9.83	0.24	0.21	1.76	0	24.64	46.85	36.32	39.83	58.92	9.09	3.19
BnaC04G0582300ZS	22.98	5.31	6.77	5.53	7.6	5.63	2.55	1.83	12.5	18.94	5.26	6.6	16.04	3.27	5.62	0.07	16.47	24.77	25.56	30.68	28.5	4.88	6.31
BnaA05G0025600ZS	16.03	11.87	5.93	5.31	6.01	6.45	6.82	10.15	4.12	6.73	25.17	71.64	24.63	21.62	18.7	227.6	8.3	15.1	19.59	10.93	12.96	21.88	41.08
BnaC04G0027100ZS	8.97	7.8	5.25	4.95	4.9	6.95	6.44	9.63	4.13	5	19.49	33.3	19.07	22.72	23.05	51.64	9.06	10.54	29.36	9.21	12.72	15.13	24.35
BnaA05G0025900ZS	1.25	1.32	0.45	0.47	0.26	0.4	0.56	0.54	0.28	0.47	4.38	1.45	0.21	0.74	0.12	0.11	2.36	0.97	1.05	1.59	1.31	1.22	0.93
BnaC04G0027500ZS	2.74	2.17	1.26	0.8	1.41	1.19	1.27	1.84	0.9	1.46	6.56	2.77	0.57	2.36	0.27	0	3.04	2.09	1.9	2.85	2.36	2.6	1.44
BnaA05G0026300ZS	4.66	4.16	4.59	5.35	5.59	5.57	5.98	5.63	6.19	6.23	3.59	1.81	1.75	1.29	1.03	0.15	5.74	4.8	5.39	7.68	6.68	8.66	3.57
BnaC04G0027900ZS	9.45	9.1	7.77	6.89	8.04	10.44	9.18	8.52	4.13	5.32	5.68	5.2	6.81	6.72	6.33	2.4	6.01	5.07	5.59	8.76	7.12	9.8	4.46
BnaA03G0205100ZS	0	0	0.04	0.05	0.12	0.04	0.09	0.09	0	0	0	29.1	3.63	1.45	0.78	81.25	0	0	0	0	0	0	0
BnaA04G0268300ZS	0	0	0.03	0.07	0	0.02	0.1	0.1	0	0	0.11	5.12	0.38	0.02	0.02	5.45	0	0	0	0	0	0.02	0.02
BnaA05G0028500ZS	0	0	0	0	0	0	0	0	0	0	9.59	5.26	0.66	0.11	0.11	7.58	0.02	0	0	0	0	0	0
BnaC03G0241700ZS	0.02	0	0.02	0	0	0	0.04	0	0	0	0.09	15.1	1.47	0.33	0.21	19.48	0	0	0	0	0	0	0
BnaC04G0585600ZS	0	0	0.04	0	0.08	0.09	0.16	0.17	0	0	0	4.12	0.52	1.05	0.04	5.24	0	0	0.02	0.05	0.04	0	0
BnaA04G0269600ZS	0.42	0.32	2.56	2.62	2.87	2.87	4.65	7.09	4.49	3.99	0.12	0.96	2.58	0.81	0.5	0.22	1.85	1.34	1.91	0.94	0.72	2.4	2.51
BnaA05G0029800ZS	4.32	2.54	2.05	1.89	2.47	3.69	4.16	4.06	4.48	4.82	0.84	0.36	2.5	3.89	5.36	0.45	1.11	0.18	0.22	0.56	1.4	1.15	0.54
BnaC04G0032300ZS	3.06	2.13	1.94	1.92	2.17	2.12	1.82	1.77	2.36	3.5	0.9	0.64	8.26	46.9	30.55	0.14	0.71	0.17	0.23	1.18	5.68	1.93	1.63
BnaC04G0586900ZS	1.24	0.28	0.53	0.62	0.76	1.18	2.25	8.47	1.89	1.98	0.7	3.48	8.36	23.42	11.69	5.68	0.45	1.17	3.79	1.19	1.03	1.76	2.7
BnaA04G0272400ZS	0.05	0.04	0.2	0.13	0.11	0.02	0	0	44.61	118.27	522.58	62.55	0.3	0	0.02	0	295.88	84.98	26.71	0.04	0.02	0	0
BnaA05G0033400ZS	0.03	0	0.01	0.01	0.01	0	0	0	0.72	6.99	125.56	32.72	0.38	0.02	0	0	63.46	0	0	0	0	0	0
BnaC04G0590000ZS	0.03	0.05	0.37	0.13	0.1	0.02	0	0.01	27.98	81.5	408.21	59.28	0.39	0	0.02	0	275.86	201.48	154.55	1.05	0.02	0	0
BnaC04G0036100ZS	0	0	0	0	0.01	0	0	0	0.28	7.73	166.27	36.34	0.2	0	0	0	81.8	0	0	0	0	0	0.02
BnaA03G0208400ZS	6.28	5.95	3.74	3.62	4.19	7.08	6.1	7.3	1.03	1.65	3.68	4.09	37.71	54.98	46.41	5.11	2.3	1.44	2.01	3.51	11.18	7.05	9.6
BnaA05G0034700ZS	5	4.69	3.11	3.07	3.28	5.09	6	7.25	1.14	1.54	3.38	8.59	71.09	124.75	95.74	9.59	0.98	0.55	0.68	1.08	7.89	5.9	17.89
BnaC03G0245400ZS	4.1	3.77	2.39	2.71	3.14	3.85	4.52	4.83	1.16	1.91	3.94	3.99	24.84	35.65	27.9	2.88	2.13	1.43	1.88	2.46	6.26	5.81	7.1
BnaC04G0037600ZS	4.36	4.31	3.13	3.21	3.87	5.87	6.68	9.63	1.2	1.44	2.58	6.94	49.15	78.98	52.55	4.7	1.04	0.53	1.18	1.88	7.3	7.62	23.14
BnaA03G0209100ZS	2.67	2.2	0.39	0.46	0.42	0.75	0.65	0.64	0.93	0.97	2.09	9.37	1.36	1.17	2.08	5.63	2.48	1.7	2.95	1.71	1.41	0.55	1.58
BnaA05G0035700ZS	1.75	2.49	0.8	0.51	0.47	0.36	0.21	0.18	1.68	1.81	3.78	7.25	1.01	0.47	0.91	7.37	7.4	1.24	1.69	0.75	0.53	0.3	0.38
BnaC03G0246300ZS	2.3	3.2	1.34	1.34	1.5	1.84	2	1.82	2.37	1.7	2.08	10.3	3.35	1.94	4.33	7.52	3.66	1.71	2.39	2.44	2.08	1.63	1.55
BnaC04G0038800ZS	1.78	1.66	0.64	0.82	0.55	0.65	0.41	0.38	1.09	1.23	3.64	5.25	3.88	10.27	17.68	3.7	5	1.02	1.15	0.74	0.52	0.41	0.32
BnaA05G0038200ZS	10.31	9.95	7.24	8	7.29	10.12	11.7	11.22	6.21	8.36	11.76	8.57	10.08	13	8.78	9.11	11.27	5.94	6.97	11.08	8.2	11.3	10.8
BnaA09G0542400ZS	9.36	9.76	4.5	4.65	5.08	7.22	7.85	9.59	3.16	3.36	5.26	5.1	4.46	4.21	5.39	0.89	3.43	2.05	3.02	4.61	4.96	6.14	6.58
BnaC04G0041700ZS	14.2	12.68	7.27	7.96	7.76	11.7	13.96	12.39	5.17	10.03	14.12	9	7.03	7.42	5.9	12.95	12.73	7.21	7.17	11.93	8.78	15.28	15.16
BnaC08G0389100ZS	7.09	6.42	3.32	3.57	3.28	4.61	4.65	4.3	1.66	2.56	5.84	4.01	6.83	6.9	7.65	1.53	2.24	1.78	1.9	2.25	2.72	4.16	3.81
BnaA04G0278900ZS	20.22	26.54	74.71	72.97	75.17	57.86	51.09	48.07	151.1	113.94	26.89	17.78	8.08	3.89	3.04	0.15	58.4	52.54	73.88	65.84	36.79	25.91	4.97
BnaA05G0040200ZS	29.88	27.75	50.94	50.26	55.58	55.29	57.15	59.04	66.9	55.02	28.01	23.68	100.55	61.92	62.89	0.6	32.21	25.01	38.26	57.02	57.53	59.35	29.58
BnaC04G0043900ZS	48.97	48.99	94.01	92.38	100.3	93.15	93.32	92.68	127.37	100.33	35.09	37.32	44.46	33.62	27.75	0.17	57.38	46.45	72.53	76.64	60.04	66.35	37.77
BnaC04G0597000ZS	7.34	11.19	19.41	20.5	19.28	11.46	10.67	8.1	96.99	42.96	14.81	6.36	5.91	3.03	4.78	0.03	27.89	13.87	22.46	22.05	9.83	3.85	0.52
BnaA05G0040500ZS	29.08	23	16.45	14	16.2	17.09	16.93	25.66	7.79	11.83	16.59	31.26	38.03	36.57	37.69	12	15.76	12.06	13.23	15.66	13.41	15.61	17.58
BnaC04G0044200ZS	23.14	18.69	14.98	14.77	16.48	18.95	18.15	26.71	13.93	12.77	15.6	34.77	17.44	17.21	18.47	29.45	12.9	10.2	10.73	10.5	10.58	11.16	7.88
BnaC04G0044400ZS	36.49	12.92	2.27	1.83	1.87	1.63	0.89	0.18	5.19	4.93	22.08	5.53	0.08	0.1	0.29	0.01	22.13	7.23	2.73	3.85	4.9	0.2	0.01
BnaA03G0213800ZS	0.03	0.19	8.56	8.73	13.61	27.45	46.76	56.08	0.57	2.82	5.6	8.79	5.92	2.69	2.75	0.05	0.99	1.88	7.75	16.74	39.07	76.89	33.24
BnaA05G0040900ZS	0.36	0.79	0.72	0.86	0.8	2.46	2.85	2.01	0.62	2.01	0.25	0.18	0.09	0.35	0.32	0	0.04	0.87	0.8	2.33	1.08	1.51	0.56
BnaC04G0044600ZS	2.57	3.01	0.95	0.94	1.29	3.67	3.72	3.35	1.31	2.43	3.8	0.7	0.19	0.03	0.4	0	2.39	5.35	1.05	0.75	8.68	19.8	33.56
BnaA03G0215000ZS	0.3	0.48	0.14	0.04	0.16	0.21	0.19	0.43	0.08	0.46	0.53	0.05	1.73	3.01	4.77	0.04	0.45	1.53	0.7	0.77	3	1.62	6.27
BnaA05G0042000ZS	0.04	0.05	0.11	0.07	0.24	0.02	0.02	0.08	0.11	0.07	0	0.08	0.69	0.02	0.15	0	0.3	0.83	0.92	0.04	0	0.04	0
BnaC03G0253500ZS	0.41	0.69	0.22	0.19	0.18	0.26	0.2	0.34	0.06	0.78	0.2	0.01	5.76	6.29	11.29	0	1.22	1.71	0.61	0.96	2.46	1.61	3.28
BnaC04G0045800ZS	0.2	0.04	0	0.04	0	0.02	0.04	0.07	0.03	0.15	0	0.07	0.55	0	0.04	0	0	0.17	0.13	0	0.03	0.26	0.08
BnaA05G0048000ZS	0.08	0	0.03	0	0	0	0	0	0	0.5	0.07	0	0	0	0	0	0.07	0	0	0	0	0.03	0
BnaC04G0053700ZS	0	0	0	0	0	0.03	0.03	0	0.06	0	0	0	0.02	0	0.04	0	0	0	0	0	0	0	0
BnaA05G0048300ZS	0	0	0.02	0	0.02	0	0	0	0	0	0.02	0.02	0.18	0.32	0.69	0	0	0	0.03	0	0	0	0
BnaC04G0054000ZS	0	0	0	0	0	0	0	0	0	0	0.03	0.31	0.05	0.08	0.14	0	0.02	0	0	0	0	0	0
BnaA03G0219600ZS	0	0	0.51	0.38	0.32	0.07	0	0.04	5	5.35	7.71	1.57	0	0	0	0.14	0	0.03	0.03	0	0	0	0
BnaC03G0258500ZS	0	0	1.14	1.15	0.66	0	0	0	5.42	8.13	17.32	6.47	0	0	0	0.43	4.82	3	1.65	0.29	0	0	0
BnaA04G0287100ZS	1.11	1.2	0.12	0.13	0.16	0.13	0.07	0	0.46	0.83	8.04	1.16	0	0	0.17	0	3.29	0.14	0.23	0.12	0	0	0
BnaA05G0053200ZS	1.49	1.28	0.07	0.15	0.13	0.03	0.02	0.02	0.49	0.99	4.38	1.1	0.05	0.12	0.16	0.3	4.09	0.14	0.14	0.14	0	0	0
BnaC04G0059100ZS	1.64	1.89	0.24	0.05	0.21	0.12	0	0.02	0.48	0.56	4.16	0.95	0.16	0.02	0.53	0.02	3.42	0.36	0.15	0.05	0	0	0
BnaC04G0605200ZS	1.19	1.52	0.2	0.05	0	0.03	0.02	0	0.28	0.53	5.44	1.15	0.21	0.46	0.42	0	3.82	0.2	0.28	0.23	0.03	0	0
BnaC04G0060400ZS	258.28	207.72	312.52	300.31	320.94	405.82	427.39	326.68	9.25	9.84	10.06	3.15	24.52	23.5	26.16	3.44	5.99	9.63	18.01	25.79	18.53	38.44	18.39
BnaA03G0222300ZS	0	0.01	0.14	0.24	0.26	0.23	0.24	0.6	0.08	0.08	0.06	131.85	20	6.36	3.72	325.53	0.33	0.08	0.02	0	0	0.03	0
BnaA04G0291000ZS	0.68	0.46	0.33	0.23	0.33	0.33	0.38	0.65	0.45	0.48	1.04	1.15	1.14	1.18	3.88	1.31	1.81	0.15	0.17	0.27	0.26	0.87	5.26
BnaA03G0223400ZS	0	0	0	0	0	0	0	0	0	0	0	86.01	0.08	0	0	2.17	0	0	0	0	0	0	0
BnaC03G0262500ZS	0	0	0	0	0	0	0	0	0	0	0	119.49	0.25	0.14	0.17	9.67	0	0	0	0	0	0	0
BnaA05G0018200ZS	1.37	2.81	6.4	5.18	6.09	8.22	6.05	10.83	4.17	6.26	3.87	22	1.88	3.9	3.21	0.24	8.26	4.66	8.49	11.46	10.92	27.65	7.94
BnaC04G0018700ZS	3.06	1.89	1.34	2.04	3.1	3.81	3.94	8.51	0.35	1.22	0.99	8.55	0.6	1.36	0.69	0.07	3.26	2.6	4.18	5.33	10.6	44.04	30.27
BnaC04G0609900ZS	0	0	0.03	0.13	0.06	0.03	0.05	0.03	0.45	0.13	2.22	0.06	0	0	0	0	0.26	0	0.06	0	0	0	0
BnaA03G0223600ZS	9.78	12.88	1.47	1.76	1.49	1.87	1.29	0.32	2.54	2.8	4.7	1.46	0.11	0.88	1.23	0.04	6.16	2.46	1.94	3.65	4	0.18	0.06
BnaA05G0016300ZS	2.65	1.3	0.3	0.51	0.5	0.6	0.72	1.43	0.56	0.61	1.71	0.82	1.24	0.67	1.14	0.06	2.39	1.13	0.54	0.26	0.93	1.26	0.03
BnaC04G0016800ZS	3.76	1.89	0.61	0.55	0.59	0.79	1.89	2.59	0.38	0.68	2.65	21.55	1.06	0.72	0.66	0.08	4.2	2.49	1.66	0.46	2.07	5.36	0.77
BnaA05G0011600ZS	24.28	28.39	0	0.02	0.04	0.22	0.06	0.06	0	0.54	0.61	0	0	0	0.15	0	0.17	2.56	18.94	26.67	25.1	0	0
BnaC04G0012100ZS	14.75	51.91	0.84	0.53	0.41	2.44	0.12	0	0	0.23	0.02	0.21	0.36	0.05	1.29	0	1.94	5.5	15.15	32.14	29.86	0	0
BnaA04G0295000ZS	27.03	30.17	0.04	0.13	0.02	0.06	0	0	0	0.65	0.06	0.06	0	0	0	0	2.43	7.07	21.38	28.51	40.7	2.24	0.32
BnaA05G0007800ZS	0.22	0.21	4.16	5.85	4.25	6.34	6.98	7.5	0	0	1.33	1731.3	396.82	149.7	79.09	6685.24	4.83	0.03	0	0.01	0.07	0.18	0.31
BnaC04G0009700ZS	0.18	0.19	3.07	4.8	3.79	5.57	6.07	6.25	0	0	0.96	1386.8	386.06	143.17	76.48	5188.63	3.44	0.03	0.02	0	0	0.26	0.22
BnaA05G0004000ZS	0	0	0	0	0	0	0	0	0	0	0	0	0	0	0	0	0	0	0	0	0	0	0
BnaA05G0003800ZS	0	0	0	0	0	0	0.05	1.27	0	0	1.01	0.43	0	0	0	0.49	0.14	0	0	0	0	0.27	0.06
BnaA03G0022700ZS	13.79	8.42	4.59	4.76	5.52	5.54	7.17	14.5	10.06	9.49	36.75	10.48	3.83	4.04	2	0.03	16.51	7.33	8.28	9.32	8.65	11.41	9.79
BnaC03G0027600ZS	16.63	8.55	5.35	4.35	5.39	5.67	7.17	16.08	11.66	10.54	38.59	11.94	2.4	2.65	0.92	0.25	14.94	8.45	10.31	9.98	8.9	9.78	9
BnaA03G0174500ZS	8.25	2.94	0.64	0.43	0.78	1.66	2.67	6.31	0.09	0.42	2.18	0.63	8.34	6.93	3.56	0.02	4.18	11.63	10.15	9.66	12.79	19.62	32.2
BnaC03G0203300ZS	4.59	2	0.95	0.7	1.06	2.41	3.57	7.84	0.08	0.25	0.43	0.27	9.51	9.29	1.82	0.01	0.66	6.1	8.8	5.91	8.35	20.69	38.59
BnaC05G0564000ZS	19.78	11.74	5.89	5.71	6.64	8.28	8.27	8.61	5.07	5	10.93	10.05	12.91	16.32	16.15	3	8.1	3.86	5.44	7.01	5.3	6.42	8.73
BnaC05G0560100ZS	5.62	4.38	2.57	2.83	2.86	3.84	4.1	4.31	3.43	3.36	4.89	3.21	4.4	5.61	4.13	1.36	5.32	4.17	3.74	4.15	3.19	6.17	4.86
BnaA03G0283300ZS	0.63	0.47	0.03	0.33	0.09	0.95	1.73	2.23	0.1	0.11	1.77	166.97	7.74	21.85	19.73	12.16	1.6	0.26	0	0.15	0.03	2.89	1.48
BnaC03G0340900ZS	0	0.03	0.06	0.03	0	0.03	0.53	1.01	0	0.13	0.86	46.85	5.09	17.05	18.33	7.01	0.03	0	0	0.04	0.07	4.12	2.47
BnaC05G0559400ZS	0	0.03	0	0	0	0.03	0	0	0	0	0.03	1.33	7.81	10.79	6.17	33.24	0	0	0.03	0	0	0	0
BnaC03G0164600ZS	16.15	12.67	8.75	8.1	9.86	10.32	10.3	14.24	7.68	8.37	23.75	14.36	10.15	13.02	7.52	6.23	16.51	8.33	9.53	13.65	11.95	15.98	15.82
BnaC03G0176600ZS	0	0.05	0	0.01	0.01	0.01	0.09	0.09	0	0.02	0.33	0.24	0	0.1	0.03	0.31	0.13	0	0	0.06	0.02	0.12	0.1
BnaA03G0282500ZS	16.06	17.83	7.69	7.54	6.21	7.06	3.03	1.06	7.32	20.09	5.56	11.25	0.26	0.02	0.02	0	18.41	12	11.17	4.74	0.53	0.01	0.07
BnaA05G0493700ZS	12.04	2.53	3.66	1.39	1.02	0	0.9	0.49	1.6	4.03	0.35	2.18	0	0	0	0	3.77	4.39	1.52	0.55	0	0	0
BnaC03G0339800ZS	16.7	18.28	7.35	7.58	5.42	6.54	2.53	0.7	6.41	19.09	5.85	12.49	0.71	0.09	0.05	0.01	20.81	12.05	10.62	5.09	0.48	0	0.02
BnaA05G0494300ZS	14.1	15.35	5.9	6.07	4.64	5.6	2.02	1.12	6.95	24.26	2.19	5.38	0.4	0.05	0	0	4.35	3.42	4.98	2	0.21	0	0
BnaC01G0493500ZS	7.67	6.52	2.72	2.32	1.88	2.61	0.85	0.45	3.4	9.69	0.34	1.47	0.31	0.4	2.06	0.01	4.68	2.59	2.02	1.29	0.21	0	0
BnaA05G0494500ZS	0.24	0.09	5.38	5.92	3.88	4.31	5.54	6.65	0	0	1.55	1316.76	406.38	142.08	82.54	5699.44	3.28	0.05	0.08	0	0	0.05	0.28
BnaC02G0411700ZS	33.26	27.38	9.35	9.62	9.49	10.71	9.83	11.98	5.9	12.91	16.13	22.08	20.17	15.63	21.86	2.1	19.7	14.17	16.72	15.02	12.97	11.32	11.05
BnaA01G0417100ZS	8.16	5.93	3.84	4.22	4.1	5.18	5.74	6.24	4.54	5.16	5.8	4.48	4.04	3.73	3.68	3.73	4.79	2.85	3.32	4.67	3.49	4.82	5.16
BnaA03G0286200ZS	6.43	4.04	5.44	5.3	5.31	5.58	5.74	4.77	2.32	2.94	2.21	1.71	7.53	6.03	7.03	0.2	1.93	1.99	2.57	2.36	3.12	3.99	6.5
BnaC03G0344100ZS	5.54	5.72	4.15	4.38	4.35	5.33	5.53	5.95	1.75	3.16	4.66	4.34	12.78	12.39	15.2	1.35	3.72	2.08	3.05	4.4	4.7	3.77	4.21
BnaA03G0286300ZS	4.06	4.37	1.41	1.36	1.23	1.29	1.79	6.15	1.15	3.65	3.93	4.86	9.6	5.12	11.83	0.3	1.66	0.77	2.12	0.44	1.03	1.76	9.16
BnaC03G0344200ZS	4.95	5.16	1.35	1.52	1.29	1.3	1.75	5.02	0.65	1.8	5.24	4.58	7.06	4.57	9.74	1.22	1.97	1.44	3.56	2.07	2.62	4.49	8.26
BnaC05G0566400ZS	0.76	3.05	0.16	0.11	0.18	0.16	0.08	0.17	0.03	0.05	0.47	5.22	0.13	0.64	0.53	0.03	0.22	0.68	1.51	0.33	0.15	0.13	0.42
BnaC01G0500700ZS	3.67	5.49	5.82	5.22	5.25	4.58	3.23	3.88	5.22	8.21	6.53	11.3	5.25	4.02	2.86	16.62	19.97	7.78	10.71	10.05	6.53	3.69	2.45
BnaC05G0568800ZS	5.37	9.61	9.8	8.36	9.08	8.02	7.71	11.5	12.1	14.03	10.59	16.55	4.52	1.96	3.27	0.96	24.95	12.17	18.58	11.87	7.41	5.99	3.76
BnaA01G0194300ZS	0	0	0	0	0	0	0	0	0	0	0	0	0	0	0	0	0	0	0	0	0	0	0
BnaA03G0289700ZS	0.04	0.09	0.2	0.24	0.38	0.43	0.42	0.45	0	0	0.14	75.59	17.88	6.94	3.82	399.62	0.42	0	0	0	0	0.04	0
BnaA05G0490800ZS	0	0	0	0	0	0	0	0	0	0	0	3.15	0	0.03	0.04	1.89	0	0	0	0	0	0	0
BnaC03G0347900ZS	0	0.01	0.29	0.42	0.23	0.46	0.46	0.38	0	0	0.1	68.95	34.42	12.94	6.98	391.04	0.24	0	0	0	0	0.01	0.04
BnaA03G0290500ZS	0	0.01	0	0.01	0.03	0	0	0.04	0.01	0.08	0.02	0.36	0.09	0	0	0.38	0.01	0.04	0.13	0	0	0.14	1.2
BnaC03G0349200ZS	0	0	0.01	0.01	0	0	0	0	0	0.01	0.03	0.65	0.15	0.19	0.22	1.26	0.02	0	0	0	0	0	0
BnaA01G0408000ZS	0	0	0	0	0	0	0	0	0	0	0.04	0	0.05	0.62	0.85	0	0.06	0.03	0	0	0	0	0
BnaC05G0549400ZS	4.28	4.54	3.14	3.78	3.93	6.42	7.67	6.74	1.4	1.56	12.62	0.04	1.85	1.44	0.72	0	0.07	0.85	2.28	1.12	3.26	7.01	3.57
BnaA01G0407600ZS	14.23	9.62	3.87	4.08	3.27	3.33	2.8	2.18	3.86	4	4.93	22.36	2.61	2.79	4.25	7.02	8.45	4.91	7.25	9.5	8.73	1.77	1.19
BnaC01G0507700ZS	14.85	18.79	1.55	1.24	1.16	0.81	0.27	0.23	2.99	3.54	4.47	28.07	4.34	7.6	7.93	4.88	7.12	2.81	7.54	7.96	9.5	0.21	0
BnaA01G0406400ZS	5.72	6	2.31	1.74	2	2.31	2.08	2.09	2.29	2.79	4.04	3.93	2.56	2.7	3.52	0.29	5.07	3.46	4.62	4.82	4.33	3.43	3.42
BnaA03G0292600ZS	4.34	3.29	1.84	1.74	1.82	1.45	1.7	2.03	1.68	1.53	2.76	1.97	1.08	0.92	1.21	0.03	3.29	2.48	2.73	3.04	2.18	2.02	1.21
BnaC01G0508700ZS	4.26	3.13	1.05	0.97	1.05	1.06	1.18	1.16	1.55	2.62	2.21	1.79	0.91	1.34	1.28	0.12	4.38	3.24	5.1	3.7	1.74	1.67	1.66
BnaC03G0351300ZS	3.09	2.43	1.06	1.2	1.35	1.16	1.3	1.4	1.28	1.63	1.86	1.84	1.08	1.19	1.2	0.08	3.14	2.2	3.32	2.63	2.5	1.58	1.95
BnaA05G0482700ZS	3.69	2.56	1.41	1.45	1.69	1.17	1.17	1.41	8.28	6.67	5.24	3.07	0.22	0.29	0.12	0	10.09	4.85	6.7	5.61	3.48	4.3	2.37
BnaC05G0557500ZS	5.41	3.8	3.21	3.72	3.74	2.5	2.64	3.76	13.27	9.91	9.9	4.84	0.82	0.8	0.48	0.01	14.5	7.05	9.83	8.72	5.22	5.95	3.13
BnaA03G0295200ZS	30.52	20.31	14.57	14.02	14.66	16.48	15.44	16.75	10.08	10.03	28.15	16.71	11.44	15.56	11.65	3.69	19.39	10.26	14.01	14.89	10.9	12.85	19.44
BnaC03G0353600ZS	27.73	19	14.37	14.82	16.11	17.21	16.43	17.27	9.72	9.31	31	16.92	16.62	22.28	17.29	6.83	19.9	10.48	11.94	15.86	13.4	15.86	22.68
BnaA03G0295700ZS	8.71	7.14	4.93	4.31	5	5.22	3.93	4.41	5.68	6.89	13.76	9.12	2.27	1.99	1.91	2.28	12.64	6.15	5.97	6.9	6.22	4.96	3.97
BnaC03G0354200ZS	5.38	4.78	4.32	3.52	3.79	3.69	3.55	2.93	4.17	4.69	10.59	4.92	1.91	1.58	1.2	0.91	8.68	3.04	3.96	3.64	3.2	2.26	1.77
BnaA09G0384700ZS	0	0	0	0	0	0	0	0	0	0.02	0.12	0.16	2.88	0.11	1.56	0	2.5	0	0	0	0	0	0.14
BnaC03G0356200ZS	0	0.16	0	0	0	0	0.06	0	0	0	0	0	0.53	0.22	0	0	0.5	0	0	0	0	0	0.12
BnaA09G0384600ZS	0	0	0	0	0	0	0	0	0	0	0	0	0.08	0	0	0	0.22	0	0	0	0	0	0
BnaA01G0400800ZS	1.81	1.15	0.2	0.22	0.35	0.3	0.21	0.14	0.22	0.29	3.34	0.69	0.09	0.03	0.11	0.12	1.76	0.21	0.34	0.33	0.11	0.11	0.02
BnaC01G0513800ZS	1.51	1.44	0.25	0.16	0.26	0.24	0.18	0.16	0.2	0.45	2.69	0.62	0.11	0.13	0.32	0.01	1.76	0.28	0.32	0.27	0.16	0.08	0.02
BnaA05G0475800ZS	2.26	7.87	4.08	4.33	4.86	6.43	9.88	11.45	0.85	4.08	1.55	0.58	0.81	0.45	0.47	0.24	0.4	6.48	0.97	3.56	11.33	14.14	2.47
BnaA01G0398900ZS	2.1	2.5	0.15	0.19	0.11	0.12	0.18	0.15	0.37	0.35	2.56	0.69	0.24	0.06	0.16	0.3	0.41	0.55	0.41	0.63	1.12	0.67	0.15
BnaC01G0515300ZS	0.18	0.53	0.15	0.14	0.24	0.36	0.37	0.29	0.42	0.61	3.1	0.61	0.14	0.02	0.01	1.25	1.03	0.87	0.25	0.36	0.76	0.85	1.02
BnaC05G0536800ZS	1.61	1.12	0.57	0.64	0.61	0.8	1.38	1.51	0.46	1.56	0.39	1.06	1.7	2.67	4.45	0.63	2.91	0.98	1	3.67	5.52	3.54	1.55
BnaA03G0299000ZS	42.99	50.43	18.81	19.68	20.27	21.09	17.46	15.49	19.92	25.19	36.64	25.13	16.55	17.3	16.89	4.38	33.14	14.97	21.46	20.55	20.22	14.18	14.59
BnaA05G0474100ZS	34.66	27.44	15.42	14.91	18.15	19.24	18.85	21.65	12.25	14.48	33.47	26.12	26.41	33.2	20.83	6.81	30.18	14.67	25.85	20.3	20	19.12	27.69
BnaC01G0516200ZS	32.92	30.11	19.68	18.53	18.88	22.64	20.77	20.28	16.2	16.89	39.09	27.89	21.76	31.18	19.95	2.93	30.17	16.14	24.83	21.2	22.77	19.97	23.03
BnaC05G0534900ZS	35.61	26.72	17.02	16.35	17.23	20.06	18.33	20.24	17.08	20.82	31.91	22.55	27.78	40.62	26.08	5.7	33.52	16.46	19.47	22.3	21.55	19.9	21.69
BnaA03G0299300ZS	0.46	3.86	1.95	1.8	2.13	2.33	2.82	10.82	1.93	2.09	0.76	5.56	1.06	1.11	0.91	4.95	1.61	4.72	12.47	2.49	3.1	12.24	11.85
BnaA05G0473400ZS	6.74	6.64	2.78	3.17	3.29	4.65	4.27	6.72	1.6	3.76	3.32	12.94	4.73	4.77	6.37	16.63	2.54	3.36	5.72	3.51	4.76	9.96	14.95
BnaA01G0396900ZS	0	0	0.02	0	0	0	0.02	0	0	0	0.04	16.98	0.57	0.16	0.05	6.02	0.06	0	0	0	0	0	0
BnaC03G0358800ZS	0.61	2.8	2.11	1.91	2.13	2.81	2.87	12.8	1.3	1.46	1.43	14.87	7.2	5.2	5.28	14.36	2.73	6.57	22.5	4.34	6.23	19.2	19.19
BnaC05G0534300ZS	6	4.48	1.1	0.93	0.93	1.79	1.67	5.73	0.79	2.04	0.47	13.96	1.86	1.48	2	19.12	0.47	1.4	2.2	0.96	1.59	6.08	10.64
BnaC01G0487100ZS	0	0	0	0	0	0	0	0	0	0	0	0	0	0	0	0	0	0	0	0	0	0	0
BnaA03G0300000ZS	7.75	5.51	2.92	3.17	3.64	3.95	3.65	4.18	2.33	2.71	6.56	3.61	2.76	4.25	2.01	0.66	4.43	2.24	3.42	2.4	2.13	3	5.31
BnaC03G0359600ZS	8.38	6.06	3.2	3.41	3.9	4.45	3.91	4.21	2.29	2.74	7.67	4.47	3.09	4.32	2.13	1.29	4.39	2.29	3.11	2.29	1.75	2.79	4.76
BnaA03G0300100ZS	12.19	5.13	5.9	6.96	6.95	6.94	7.36	10.76	1.2	1.16	1.16	0.12	0.25	0	0	0.02	3.85	0.85	1.16	1.96	3.22	6.27	2.44
BnaA01G0396200ZS	10.32	7.61	10.6	7.52	9.28	7.55	5.34	3.96	5.85	2.28	0.04	0	0.25	0.23	0.05	0	0.5	0.17	0.4	0.64	0.36	0.03	0.02
BnaC05G0533300ZS	0	0.06	0	0	0.07	0	0.04	0	0.09	0	0	0	0	0	0	0	0.1	0	0	0	0	0	0
BnaA05G0471800ZS	0.35	0.36	1.12	1.25	1.07	1.43	0.98	1.53	2.45	2.72	6.55	0.74	0.16	0.07	0	0	1.05	0.09	0.26	0.28	0.18	0.17	0
BnaC05G0532400ZS	1.6	1.66	1.11	1.23	0.64	1.95	2.51	3.8	3.59	4.22	10.73	0.5	1.48	1.43	0.5	0	0.74	0.2	0.2	0.47	0.7	0.87	0.47
BnaA05G0471100ZS	28.98	12.33	6.49	6.59	6.86	10.6	8.37	6.32	12.99	69.43	6.17	14.42	8.13	17.65	20.55	0.16	1.22	9.96	5.91	3.31	4.1	17.53	10.18
BnaA01G0394700ZS	0.83	1.19	0.9	0.62	0.43	0.63	0.81	0.79	1.8	25.29	0.41	0.04	0	0.04	0.04	0	0.21	0.12	0.19	0.45	0.24	0.34	0.02
BnaC05G0531800ZS	1.64	1.56	0.95	0.58	0.54	0.77	0.49	0.27	4.11	29.92	5.57	3.33	0.33	0.87	1.01	0	0.66	1.67	0.76	0.14	0.16	0.24	0.06
BnaA03G0301300ZS	4.42	5.06	26.06	27.27	32.11	40.51	52.88	59.55	28.91	20.74	0.84	0.2	17.67	6.58	9.23	0.26	2.65	6.27	14.84	17.93	23.13	61.39	80.45
BnaC03G0361000ZS	7.98	5.85	11.23	11.75	13.75	17.64	22.29	25.43	10.87	5.66	1.9	0.7	12.83	6.86	9.6	0.09	3.41	6.78	10.07	11.18	11.9	29.76	29.35
BnaA05G0470200ZS	0	0	0	0	0	0	0	0	0	0	0	0.03	0	0	0	0	0.38	0	0	0	0	0	0
BnaC05G0531000ZS	0	0	0	0	0	0	0	0	0	0	0	0	0	0	0	0	0.21	0	0	0	0	0	0
BnaA05G0468800ZS	0	0.13	0	0.08	0.03	0.06	0.07	0.06	0	0	75.94	0	0.04	0.15	0.19	0	0	0	0.01	0	0.05	0.11	0.11
BnaC05G0529700ZS	0	0.05	0.03	0.05	0.16	0.22	0.08	0.13	0	0	139.51	0	0	0.14	0.03	0.05	0	0.08	0	0.04	0	0	0.12
BnaA01G0392700ZS	48.12	61.82	10.17	10.86	11.3	9.85	7.67	9.74	20.17	17.36	18.24	25.76	7.14	4.68	7.75	0.86	15.12	7.42	24.81	24.04	29.22	7	4.66
BnaC05G0526900ZS	0.08	0.02	0.02	0.03	0.03	0	0	0	3.75	4.39	8.19	4.58	0.01	0.02	0.03	0	16.36	0.19	0.11	0.01	0.02	0	0
BnaA05G0466000ZS	11.26	8.66	16.48	18.78	19.67	17.46	20.77	22.2	26.71	34.46	18.68	8.7	15.97	21.81	15.86	0.14	22.62	18.6	23.48	35.93	31.66	27.5	15.74
BnaC05G0526100ZS	14.12	9.66	15.26	17.19	18.7	21.72	19.27	18.4	15.66	25.64	13.3	8.64	14.4	13.79	10.47	0.25	13.99	15.03	17.72	24.88	21.1	25.02	19.6
BnaA05G0462100ZS	0	0	0	0	0	0	0	0	0	0	0	0	0	0	0	0	0.18	0	0	0	0	0	0
BnaC05G0521900ZS	0	0	0	0	0	0	0	0	0	0	0.03	0	0	0	0	0	0	0	0	0	0	0	0
BnaA01G0387500ZS	6.38	4.09	2.56	2.8	2.83	2.93	4.01	5.03	2.58	2.64	8.73	2.61	0.24	0.41	0.05	0.15	4.9	3.42	3.66	3.85	4.02	4.44	5.19
BnaC01G0491200ZS	3.41	2.79	1.49	1.5	1.55	1.74	1.75	3.04	1.54	1.87	7	1.43	1.52	5.28	0.72	0.05	3.5	2.9	2.75	2.93	2.76	2.66	1.6
BnaA05G0461000ZS	4.65	2.18	1.26	1.24	1.53	1.8	1.87	2.67	1.07	2.03	2.87	1.59	3.79	3.92	3.87	0.07	9.78	6.9	6.16	16.85	15.46	10.17	5.62
BnaC05G0520500ZS	2.99	1.05	0.41	0.56	0.62	0.67	1.11	1.43	0.88	0.87	3.12	1	8.3	5.85	5.45	0.04	5.44	2.64	7.5	19.86	14.27	9.78	6.42
BnaC01G0491900ZS	0	0.02	0	0.01	0	0	0.05	0.02	0	0.1	0.11	0.09	0.01	0.1	0.44	0	1.68	0	0	0	0.06	2.54	4.42
BnaA05G0456400ZS	6.5	3.47	2.05	2.3	2.4	3.25	4	6.87	2.16	2.53	6.67	3.64	2.92	2.11	2.78	0.32	6.52	4.24	4.51	5.15	7	11.42	5.81
BnaC03G0373100ZS	0.01	0.68	0	0	0.05	0	0	0	0	0	0.69	10.9	0.34	0.09	0.1	5.98	0.05	0	0	0	0	0	0
BnaA05G0453600ZS	0	0	0.03	0.1	0	0.02	0.07	0	0	0	0.86	0.05	0.32	0.03	0.44	0.02	0.23	0	0	0	0	0	4.87
BnaC05G0511700ZS	0.08	0	0.06	0.37	0.3	0.1	0.02	0.02	0	0.01	1.03	0.05	1.24	0.07	0.91	0	0.36	0	0	0	0	0	17.68
BnaA05G0452400ZS	22.91	24.54	27.09	27.64	29.61	32.27	32.62	42.59	54.7	80.37	45.42	29.8	10.3	11.2	11.82	5.92	66.02	85.51	58.04	64.1	128.13	131.72	107.31
BnaC05G0510700ZS	24.46	21.27	18.98	19.56	19.68	22.15	21.48	25.62	43.47	41.44	40.75	22.37	30.47	37.08	36.42	2.94	38.2	37.9	34.36	34.98	78.06	78.43	53.82
BnaC05G0508000ZS	0	0	0	0	0	0	0	0.02	0	0	0	0	0	0	0	0.03	0	0	0	0.01	0	0	0.02
BnaA05G0444200ZS	0.5	0.58	1.45	1.63	2	1.45	1.31	1.19	1.04	1.75	3.28	3.35	1.89	1.86	0.98	4.89	2.82	270.14	26.21	2.73	94.84	97.03	95.14
BnaC05G0507200ZS	1.85	1.62	2.34	2.57	3.35	2.33	1.91	1.88	2.19	3.05	5.64	7.74	2.63	3.19	1.56	8.42	5.51	281.54	34.2	3.82	100.71	115.26	109.67
BnaC01G0483000ZS	0.27	0.25	0.32	0.3	0.57	0.47	0.44	1.12	0.25	0.8	0.63	0.21	0.38	0.6	0.17	0.04	0.67	0.29	0.45	0.44	0.36	0.49	0.88
BnaA03G0316100ZS	1.38	2.58	0.99	1.12	1.58	1.73	1.62	2.56	1.56	2.77	11.53	3.18	12.35	14.98	15.29	0.04	6.09	1.98	3.28	3.73	1.79	1.18	1.83
BnaC03G0379100ZS	2.72	3	1.29	1.73	1.71	1.99	1.6	2.02	1.39	1.37	4.92	2.57	2.77	3.35	1.84	0.02	4.05	1.28	2.64	1.45	1.46	1.11	0.69
BnaA03G0313000ZS	0.05	0	0	0	0	0.04	0	0	0	0	0	0	0	0	0	0	0	0	0	0	0	0	0
BnaA05G0438500ZS	0.1	0.25	0.13	0.1	0	0.08	0.09	0	0.16	0	0	0	0	0	0.01	0	0	0.08	0	0	0.06	0	0
BnaC03G0375200ZS	0.04	0	0	0	0.04	0	0.16	0.39	0	0.03	0	0	0	0	0	0	0	0.03	0.18	0	0	0	0
BnaA08G0257500ZS	0	0	0	0	0	0	0	0	0	0	0.2	0	0	0	0	0	0	0	0	0	0	0	0.02
BnaA09G0614100ZS	3.86	4.13	1.72	1.19	1.61	1.56	1.3	1.28	5	5.55	9.74	5.33	1.23	1.36	0.65	0.13	6.82	3.88	5.08	5.06	4.34	2.87	3.09
BnaC08G0244900ZS	0	0	0	0	0	0	0.07	0.06	0.03	0	1.24	0	0.08	0	0	0	0	0	0	0	0	0.07	0
BnaC08G0469700ZS	4.43	3.43	2.41	2.42	2.02	2.5	1.9	2.42	4.58	4.34	11.3	6.59	1.16	2.21	0.69	0	9.61	5.7	6.56	6.12	5.72	4.24	1.88
BnaA03G0318500ZS	7.72	5.8	4.45	4.34	4.69	5.1	5.41	5.28	3	4.2	7.29	5.12	3.89	3.84	3.5	1.7	6.11	2.75	2.79	4.61	3.81	4.19	3.92
BnaA03G0319100ZS	7.35	5.93	4.26	3.46	3.56	5.1	4.79	4.68	1.6	2.43	7.22	4.23	6.56	12.61	7.89	2.06	4.29	2.4	2.23	3.73	3.29	5.07	3.42
BnaC03G0382700ZS	6.72	5.39	3.02	2.46	3.13	3.52	3.28	2.8	2.02	2.3	4.58	3.64	6.72	13.48	7.78	0.84	3.63	2.38	1.96	3.63	3.36	4.56	4.68
BnaA01G0379800ZS	23.83	23.98	6.09	6.06	6.61	9.04	9.31	11.62	3.19	6.49	16.86	9.2	19.17	59.66	36.54	1.69	13.25	7.23	7.46	9.38	11.74	9.34	13.16
BnaC05G0494600ZS	20.15	11.52	4.68	5.22	4.9	6.06	6.48	6.36	5.76	8.29	12.26	9.69	8.11	8.08	6.53	4.01	12.01	7.77	10.54	11.61	10.1	6.99	7.46
BnaA01G0376200ZS	70.45	83.59	72.14	77.3	72.4	56.97	51.19	47.15	58.45	55.22	109.32	84.99	34.19	52.7	78.08	3.16	123.03	76.76	90.03	106.68	95.38	59.34	49.59
BnaA05G0446100ZS	20.62	21.28	24.54	22.42	24.63	19.98	16.28	13.4	39.04	40.89	36	38.54	28.78	44.61	49.58	1.65	51.61	34.57	43.28	43.99	39.86	23.98	19.73
BnaC01G0471300ZS	95.32	76.83	99.32	97.61	95.64	81.03	69.46	67.23	69.84	71.05	106.72	123.98	186.15	251.58	333.29	16.43	156.11	101.58	111.83	131.2	131.29	111.43	117.97
BnaA03G0322800ZS	10.31	7.66	5.57	5.47	6.03	5.48	6.21	9.3	5.17	6.99	10.09	13.16	26.26	32.39	37.86	2.15	9.41	5.89	7.76	7.36	8.82	13.29	19.89
BnaC03G0387000ZS	10.21	7.57	7.17	6.97	6.15	7.18	7.05	10.37	6.27	7.23	10.75	12.19	16.02	18.79	20.87	0.92	9.34	6.49	7.65	7.53	9.06	12.35	11.94
BnaC05G0489000ZS	9.12	9.33	8.47	9.17	7.95	7.92	8.12	7.16	4.74	5.28	5.54	12.25	8.48	6.41	13.38	4.27	5.34	4.26	6.72	6.08	6.25	4.71	2.8
BnaA05G0433800ZS	6.65	5.1	2.44	2.58	2.76	3.62	3.78	3.88	1.91	1.75	8.87	4.62	2.87	3.48	1.7	1.43	3.68	5.03	2.79	3.04	3.13	2.43	2.47
BnaC05G0488100ZS	11.93	8.39	3.45	3.41	3.55	4.18	3.98	4.71	1.7	1.84	9.24	5.89	3.84	4.04	3	1.48	4.61	6.15	3.47	3.84	3.48	2.92	3.3
BnaA01G0373700ZS	11.18	7.44	1.63	1.61	1.89	2.14	2.58	2.66	2.04	1.7	6.88	3.69	4.76	7.98	4.73	1.24	2.25	0.76	1.33	3.07	2.71	1.64	2.76
BnaA05G0433500ZS	2.21	1.61	1.3	1.24	1.6	1.17	0.91	1.1	2.25	1.86	2.12	1.48	0.57	0.4	0.39	0	3.6	1.8	1.43	2.67	2.27	1.85	1.31
BnaA03G0325500ZS	5.79	3.76	3.27	3.73	4.15	5.56	6.96	7.9	3.69	5.82	1.5	11.5	21.22	23.79	30.9	34.08	3.17	11.11	9.37	5.01	18.56	11.43	17.01
BnaA05G0429900ZS	0	0.3	0	0.05	0.03	0	0.18	0.07	0	0	0.02	14.07	1.12	0.25	0.29	42.57	0.18	0	0	0.04	0.05	0	0.06
BnaC03G0391300ZS	12.31	7.1	10.32	11.21	12.74	15.92	15.27	15.64	5.05	8.69	3.85	21.07	82.18	80.95	74.32	45.46	5.78	3.68	9.75	15.75	28.76	19.84	34.75
BnaC05G0483100ZS	0	0	0	0	0	0	0	0	0	0	0	0	0.23	0.15	0.07	0.44	0	0	0	0	0	0	0
BnaA05G0427500ZS	1.17	1.08	0.63	1.34	1.69	1.32	0.2	1.5	17.91	19.76	92.88	30.58	0.22	0.63	1.02	0.61	26.55	5.22	5.4	0.51	0.3	0.02	0
BnaC05G0479900ZS	10.62	11.91	4.8	5.21	6.15	4.16	0.29	0.41	56.1	57.67	93.53	190.13	4.52	28.32	11.08	9.64	114.08	69.16	59.57	7.84	1.05	0	0
BnaA01G0367900ZS	0	0	0	0	0	0	0	0	0	0.08	0	2.82	0.02	0	0	0.88	0	0	0	0	0	0	0
BnaA03G0327100ZS	0	0	0	0	0	0	0	0	0	0	1.43	1.15	0	0	0	0.4	0	0	0	0	0	0	0
BnaA05G0427000ZS	0.03	0	0	0	0	0	0	0	0	0	0.69	4.52	0.09	0.04	0.03	1.06	0	0.03	0	0	0	0	0
BnaC03G0392500ZS	0	0	0	0	0	0	0	0	0	0	0	2.26	0	0	0	0.2	0	0	0	0	0	0	0
BnaA01G0365600ZS	0.1	0.09	0.05	0.12	0.01	0.09	0.08	0.06	0.01	0.04	0.09	24.28	4.38	2.09	0.8	44.3	0.11	0.03	0.05	0	0	0	0.01
BnaA05G0424100ZS	0.13	0.08	0.01	0	0	0	0	0.02	0	0	0	20.05	0.37	0.15	0.19	9.57	0	0	0	0	0	0.73	0.26
BnaC05G0476000ZS	0	0	0.01	0.02	0.05	0.05	0.05	0.06	0.01	0	0.04	10.03	0.12	0.03	0.06	1.87	0	0	0	0	0.03	0	0
BnaA05G0422700ZS	8.69	7.17	4.87	5.02	5.45	6.34	6.81	7.01	4.91	4.38	7.44	4.4	3.65	7.01	5	0.89	6.7	4.19	4.59	5.38	3.8	5.75	7.98
BnaC05G0474700ZS	11.47	8.03	5.51	5.09	5.84	7.12	7.42	8.47	4.95	4.2	7.25	4.46	5.45	8.48	6.09	0.89	7.06	4.5	4.76	5.61	3.91	5.75	8.76
BnaA01G0361600ZS	0.01	0	0.02	0.01	0	0	0	0	0	0	625.46	0.02	0.01	0	0.02	0.04	0	0	0	0	0	0	0.01
BnaC01G0451600ZS	0.01	0.01	0.01	0.01	0.01	0	0.01	0	0	0.01	575.64	0.03	0	0	0.02	0.09	0.02	0	0	0	0	0	0.04
BnaA05G0416800ZS	4.95	6.25	10.75	11.48	11.21	8.92	8.78	7.4	16.14	16.08	16.25	8.04	3.04	1.58	1.81	0.19	17.13	9.63	13.51	11.43	7.72	7.41	5.58
BnaC05G0468400ZS	3.67	5.11	12.06	13.26	12.56	8.23	8.3	6.87	19.4	18.77	13.13	7.58	2.28	1.35	1.64	0.04	16.73	9.5	13.46	11.96	6.52	4.93	3.12
BnaC01G0448900ZS	5.11	3.58	2.44	2.34	2.49	2.38	2.57	2.46	1.27	1.7	2.94	1.42	0.46	0.26	0.29	0.02	6.01	2.63	2.95	3.97	2.42	2.37	2.65
BnaA05G0415800ZS	10.52	8.27	9.56	9.41	11.56	12.71	13.01	11.06	9.81	14.56	12.3	8.88	9.64	10.97	12.48	0.83	12.79	8.67	8.62	12.47	13.5	10.14	8.96
BnaC05G0467900ZS	14.39	9.61	12.6	15.32	15.01	16.36	17.14	16.41	17.17	14.25	12.8	11.45	13.21	17.05	13.82	1.15	14.77	8.32	8.78	11.86	12.99	12.82	8.63
BnaA01G0358400ZS	2.77	3.07	2.13	2.11	1.97	2.41	2.96	3.28	1.54	2.06	4.45	5.23	3.54	3.98	3.94	3.94	3.48	2.37	2	2.49	2.93	2.33	2.44
BnaC01G0445600ZS	3.06	3.01	2.15	1.68	1.87	2.17	2.29	2.68	1.67	2.43	3.64	4.15	3.15	4.4	3.6	2.17	3.01	4.63	1.73	2.98	4.02	3.61	5.67
BnaA01G0357100ZS	0.07	0	0	0	0	0	0	0	0	0	10.93	0.3	0	0	0	0	0.96	0	0	0	0	0	0
BnaA05G0412600ZS	0	0	0	0	0	0	0	0	0	0	6.94	0.08	0	0.09	0.15	0	0	0.04	0.14	0	0	0	0
BnaC01G0443900ZS	0.14	0	0	0	0	0	0	0	0	0.04	12.53	0.24	0	0	0	0	1.76	0	0.09	0	0.13	0	0.02
BnaC05G0464600ZS	0.76	0.15	0	0	0	0.07	0.05	0.11	0	0.04	1.12	0	0.02	0.06	0.04	0.02	0	0.32	1.31	0	0	0	0.05
BnaA01G0356600ZS	0	0.04	0.02	0	0	0	0	0	0	0.01	0.46	0.14	0	0	0	0.02	0	0	0	0	0	0	0
BnaA03G0336200ZS	0	0.12	0.01	0.02	0.03	0	0	0.02	0.21	0.75	3.18	0.86	0.08	0.02	0.08	0	0.07	0	0	0	0	0	0.13
BnaA05G0412000ZS	0	0.02	0	0.02	0.02	0	0	0	0	0.34	12.38	1.82	0	0	0	0	0.31	0.02	0.02	0	0	0	0
BnaC03G0403500ZS	0.11	0.02	0.78	0.34	0.68	0.65	0.44	0.4	0.09	1.01	0.38	0	0.02	0	0	0.05	0.12	0	0	0	0	0	0
BnaC01G0443400ZS	0	0.22	0.08	0.04	0.04	0.07	0.02	0.13	0.02	0.12	1.77	0.28	0	0	0	0	0.33	0.01	0.02	0	0	0	0
BnaC05G0463800ZS	0.2	0.47	0.06	0.05	0.04	0.18	0.04	0.03	0.13	0.7	9.54	1.53	0.06	0	0	0	0.09	0	0.02	0	0	0	0
BnaA03G0337600ZS	7.99	5.62	3.51	3.67	3.79	4.62	4.76	4.51	6.47	8.3	3.18	8.36	10.93	15.5	17.78	19	5.4	4.46	4.46	4.2	2.72	4.63	7.44
BnaC03G0405400ZS	6.39	6.7	3.63	3.8	4.15	4.85	4.69	4.85	5.02	6.59	3.07	5.91	10.52	12.76	14.98	8.71	5.25	4.64	6.11	4.92	4.15	7.72	13.16
BnaA05G0403600ZS	3.09	1.65	1.06	1.12	1.13	1.12	1.18	2.1	5.5	5.83	8.57	3.1	1.5	4.12	0.47	0.01	8.03	6.26	5.85	8	6.16	6.13	4.41
BnaC05G0452900ZS	2.8	0.97	1.08	1.03	1.13	1.04	1.34	2.15	3.7	3.69	7.53	2.83	0.84	2.4	0.22	0.05	5.93	3.27	3.59	4.3	3.11	3.97	3.5
BnaA01G0351100ZS	0.58	0.93	0.17	0.08	0.17	0.22	0.42	0.17	0.48	0.44	13.28	10.19	0.48	0.25	0.12	0	9.85	0.81	0.64	2.26	1.59	0.19	0.28
BnaA03G0339700ZS	0.16	0.28	9.67	9.45	9.19	12.38	14.44	20.37	8.43	5.33	23.19	45.57	3.32	6.45	0.48	0.04	0.12	0.03	0.08	0.12	0.08	0.65	0.09
BnaA05G0402900ZS	2.44	2.94	22.07	20.4	23.27	23.51	23.97	29.02	20.18	14.51	35.32	43.84	16.35	26.16	1.36	0.08	7.78	1.02	2.93	6.18	2.7	5.09	3.72
BnaC03G0408900ZS	0.26	0.73	8.96	9.72	9.95	10.95	18.06	19.82	6.47	4.8	41.4	39.56	7.55	12.73	0.69	0.04	1.51	0.75	0.91	2.77	4.05	1.68	1.6
BnaC05G0452400ZS	5.14	7.81	46.96	44.3	51.05	57.02	60.73	66.08	28.09	14.17	43.98	65.8	30.44	54.29	3.42	0.14	16.8	8.55	19.26	28.69	14.8	12.65	9.13
BnaC03G0412800ZS	1.89	23.03	7.79	7.24	6.67	9.84	27.02	52.98	19.62	36.16	2.77	33.35	9.22	31.36	8.92	1.32	5.5	40.79	120.28	16.51	35.08	61.13	2.64
BnaA05G0394500ZS	10.31	9.51	12.76	13.54	13.53	9.21	8.73	10.44	32.37	27.06	10.09	5.48	3.81	3.66	3.11	0.17	29.27	14.21	17.12	19.32	10.88	7.3	5.74
BnaC05G0441200ZS	12.54	10.32	12.77	14.03	14.43	10.87	11.22	14.85	30	21.65	11.65	8.17	6.44	5.76	5.38	0.24	30.06	14.74	22.23	20.17	13.5	9.18	7.81
BnaA01G0340800ZS	608.01	286.44	143	150.89	158.04	222.66	241.83	247.95	513.25	705.87	186.98	140.46	104.57	90.48	96.64	45.3	247.69	214.56	156.75	332.14	373.45	224.23	146.09
BnaA03G0346800ZS	187.5	153.33	66.96	63.04	68.15	77.72	74.49	88.98	222.51	279.02	132.44	116.83	49.66	46.76	42.86	36.52	215.66	135.05	118.21	173.77	168.75	106.93	115.3
BnaA05G0389400ZS	2.34	0	0	0	0	0	0	0	0	0	7.58	58.8	1.59	0.67	0.37	29.3	0.12	0	0	0.05	0	0	0
BnaC01G0421100ZS	1202.87	581.08	293.64	286.21	317.06	412.89	438.62	414.61	649.93	941.01	365.45	295.29	187.68	165.53	170.57	140.21	576	441.12	317.21	780.2	882.58	507.29	299.78
BnaC03G0418500ZS	342.87	272.76	90.26	89.39	95.12	112.39	134.38	180.48	349.83	596.49	155.67	91.13	54.51	58.47	48.61	27.04	201.85	147.09	138.26	263.37	289.13	254.87	175.77
BnaC05G0434700ZS	0.04	0	0	0.04	0	0.09	0.09	0.1	0	0	5.67	33.82	2.13	0.68	0.46	39.18	0.08	0	0	0	0	0	0
BnaC03G0419900ZS	1.5	0.66	0.1	0.09	0	0	0	0	0.35	0.91	0.45	0	0	0	0	0	0.48	0.22	0.19	0.29	0.05	0	0
BnaA03G0349800ZS	0.05	0.05	0	0	0	0	0.09	0.06	0	0	0	0.03	0	0	0	0.03	0.01	0.03	0.02	0.06	0.02	0	0
BnaA05G0383800ZS	0.37	0.38	0.87	1.09	1.14	4.67	7.33	45.95	0.06	0.01	0.16	0.04	9.27	0.46	2.8	0	0.02	0.25	1.35	0.59	0.41	1.76	0.31
BnaC03G0423100ZS	0	0.13	0	0	0	0	0	0.23	0	0	1.22	0	0	0.03	0.3	0.79	0	0.05	0	0.16	0.04	0	0
BnaC05G0427600ZS	0.33	0.25	0.11	0.18	0.12	0.51	0.75	30.26	0.24	0.04	0.33	0.14	28.42	0	0.39	0.3	0	0.19	0.5	0.77	0.18	0.03	0.22
BnaA01G0330800ZS	1.85	1.76	0.83	0.6	0.88	0.54	0.49	1.16	0.65	0.82	2.94	1.04	4.4	5.07	3.88	1.52	2.96	1.82	1.53	2.87	2.76	1.35	1.73
BnaA05G0380200ZS	6.85	5.52	4.54	3.74	3.84	4.35	5.12	6.42	4.73	4.67	6.81	7.06	7.45	8.64	4.48	0.54	7.17	5.3	6.51	6.04	6.47	10.08	12.4
BnaC01G0408700ZS	2.54	1.91	0.71	0.78	1.09	0.83	0.92	1.27	1.32	0.79	2.78	1.15	0.21	1.76	0.37	0.78	4.3	2.19	1.58	3.33	3.15	2.6	2.7
BnaC05G0424300ZS	4.05	3.09	1.93	2.37	1.98	1.98	2.21	3.18	1.98	2.68	3.78	3.2	1.93	2.92	1.77	0.3	4.5	2.77	2.99	4.03	4.37	4.64	3.91
BnaC01G0408100ZS	0	0	0	0	0	0	0	0	0	0	0	0	0	0	0	0	0	0	0	0	0	0	0
BnaA05G0377300ZS	3.36	3.13	1.54	1.31	1.71	1.58	1.63	2.48	1.8	1.95	11.95	3.06	1.54	2.31	1.16	1.01	7.14	2.22	2.37	2.53	2.97	2.51	2.3
BnaA03G0352700ZS	6.74	6.55	7.09	6.6	7.32	10.3	10.73	5.4	9.66	9.91	10.54	3.42	2.78	3.09	2.66	3.11	10.33	3.7	3.22	5.97	5.97	4.23	4.66
BnaC03G0427700ZS	9.87	8.34	4.4	3.98	3.95	3.95	3.89	5.46	5.19	6.92	12.09	5.79	3.18	5.1	3.84	0.83	15.52	5.9	4.9	8.08	8.16	7.88	7.37
BnaC05G0419600ZS	5.14	5.2	2.25	1.88	2.1	1.94	1.86	2.68	2.51	3.73	15.29	5.02	2.98	4.26	2.4	0.3	10.94	3.99	3.72	4.35	4.44	3.19	2.84
BnaA05G0375900ZS	16.37	24.33	16.43	16.87	17.54	25.52	21.46	21.67	42.24	24.36	12.02	9.76	18.41	26.53	21.74	3.66	11.63	13.84	14.16	14.06	8.54	15.1	37.31
BnaC01G0405900ZS	6.01	6.4	6.86	6.22	7.35	9.68	9.46	10.97	5.27	4.74	6.73	7.86	0.97	1.42	1.85	4.7	7.12	4.56	6.14	7.02	5.47	10.83	7.91
BnaC05G0415400ZS	2.6	1.86	2.76	2.37	2.78	2.63	2.79	2.22	6.6	2.11	2.05	1.64	0.85	0.59	0.72	0.12	2.92	1.75	1.51	1.49	1.59	2.95	2.82
BnaA01G0327400ZS	0	0	0	0	0	0	0	0	0	0	0	4.86	0.05	0.03	0.12	0.71	0	0.8	0.22	0	0.08	0.02	0.03
BnaC01G0405400ZS	0.03	0	0	0	0.05	0.05	0	0.13	0	0.04	0	6.22	0	0	0	0.5	0.03	2.16	2.72	0.07	0.49	0.17	0
BnaA03G0354800ZS	1.35	2.47	0.02	0	0	0	0	0	0.15	0.57	2.67	0	0	0	0.12	0	0.4	0.06	0.1	0.07	0	0	0
BnaA01G0324400ZS	172.5	133.93	185.29	191.1	197.46	241.41	214.99	131.91	379.36	478.25	50.65	116.52	29.09	29.86	54.1	23.67	133.7	106.79	147.04	208.66	120.68	80.94	50.69
BnaA03G0355300ZS	198.72	189.85	137.2	135.53	142.62	211.45	224.3	194.87	155.78	222.12	41.81	220.6	89.68	75.05	105.51	26.02	79.11	80.74	121.67	170.57	139.79	178.8	270.64
BnaC03G0430900ZS	123.18	109.98	130.78	129.16	135	201.92	211.46	163.75	115.79	150.66	28.42	135.11	75.39	37.87	39.54	31.03	38.03	45.39	77.39	95.01	106.65	173.78	135.04
BnaC01G0401600ZS	338.3	236.01	250.81	254.97	258.48	325.32	301.47	202.81	378.7	580.58	87.02	170.53	21.2	39.93	52.12	57.55	150.59	132.61	209.17	247.92	170.73	155.25	94.28
BnaA01G0322700ZS	0.03	0.01	0.55	0.92	0.58	0.99	0.82	1.07	0	0	0.18	189.99	95.15	33.59	18.29	1060.34	0.47	0	0.01	0	0.01	0.04	0.07
BnaC01G0399300ZS	0.03	0.01	0.42	0.79	0.45	0.45	0.66	0.75	0	0	0.11	152.19	8.85	5.22	2.75	764.15	0.39	0	0	0	0	0.05	0.02
BnaC03G0433800ZS	0.01	0	0.53	0.45	0.23	0.42	0.49	0.56	0	0	0.09	109.6	28.88	12.38	6.18	585.74	0.23	0	0	0	0	0.01	0.03
BnaA01G0321900ZS	10.88	13.8	22.93	24.46	23.33	22.84	23.09	25.24	22.88	24.87	18.17	9.73	69.7	68.93	33.94	0.62	15.09	9.81	18.09	16.99	10.15	19.6	10.14
BnaA05G0366000ZS	55.12	71.77	2.52	2.37	1.78	1.36	0.81	0.34	4	4.24	3.19	2.89	0.14	0.28	0.55	0.23	12.05	2.36	6.49	6.61	4.76	0.24	0.01
BnaC05G0401500ZS	81.46	118.72	1.09	0.93	0.72	0.92	0.19	0.17	3.01	8.49	8.13	6.31	1.41	1.65	3.57	0.02	17.68	7	16.99	15.38	18	1.05	1.24
BnaA01G0319500ZS	2.58	2.21	1.43	1.22	1.42	1.36	0.81	0.82	2.14	2.36	4.23	2.49	1.12	0.72	0.76	0.11	3.83	1.61	1.08	1.49	0.83	0.86	0.49
BnaC01G0394900ZS	2.65	1.69	0.57	0.48	0.29	0.25	0.09	0.18	1.05	1.56	3.72	1.7	0.12	0.16	0.12	0.14	3.12	1.14	0.95	1.06	0.29	0	0.03
BnaC05G0395000ZS	0	0	0	0	0	0	0	0	0	0	0	0	0	0	0	0	0	0	0	0	0	0	0
BnaC05G0396100ZS	6.49	5.39	2.34	2.05	2.35	2.61	2.62	2.82	3.34	3.08	3.66	4.12	3.47	4.16	4.54	2.47	5.81	2.32	2.46	3.3	3.08	2.91	3.44
BnaA03G0360900ZS	10.45	9.99	7.56	7.6	7.32	8.7	7.76	8.63	5.72	7.99	8.75	10.14	15.64	18.98	15.04	7.27	9.16	7.37	7.1	9.97	10.97	12.82	14.86
BnaA01G0316800ZS	5.63	8.93	6.79	6.15	6.51	7.59	7.8	10.91	6.65	7.8	12.38	11.13	29.27	30.2	28.97	4.97	12.39	8.24	8.34	7.77	9.62	13.49	16.54
BnaC01G0391500ZS	9.86	12.39	8.76	8.76	8.2	10.2	10.77	13.53	9.26	12.71	14.63	13.56	5.8	10.73	8.13	5.17	15.75	11.26	12.57	10.44	12.02	18.36	19.7
BnaA08G0026300ZS	20.63	18.9	11.31	10.93	12.54	12.3	12.75	17.25	13.52	13.19	44	23.33	26.15	25.59	24.61	4.86	30.18	14.6	15.79	16.47	18.35	18.41	22.05
BnaA03G0361800ZS	1.77	1.32	0.65	0.44	0.64	0.76	0.84	1.28	0.39	0.4	0.71	42	15.23	6.17	3.53	228.05	0.81	0.18	0.42	0.73	0.4	0.43	0.58
BnaA01G0315500ZS	0.01	0	0.02	0.1	0.09	0.05	0.17	0.09	0	0	0	18.88	10.01	3.22	2.18	100.66	0.06	0	0	0	0	0.01	0.01
BnaC03G0442100ZS	1.15	1	0.54	0.54	0.42	0.83	1.12	0.92	0.52	0.61	1	36.98	13.66	5.56	3.2	201.19	1.22	0.26	0.61	0.69	0.27	0.52	0.78
BnaA03G0363500ZS	25.82	18.27	11.25	10.71	11.95	13.97	15.44	19.4	8.88	11.25	28.94	15.04	17.97	19.25	17.43	3.09	22.64	18.27	16.59	22.45	25.99	24.66	29.62
BnaC03G0443600ZS	24.85	14.03	10.36	10.41	9.3	11.15	11.95	16.06	7.78	11.35	19.75	11.75	13.08	14.87	12.48	2.43	18.16	16	13.47	18.95	18.33	19.63	19.33
BnaA05G0350400ZS	0.02	0.02	0.04	0.03	0.01	0	0.08	0.15	0	0	0.32	0.36	1.34	0.06	0.04	0	2	0.39	0.34	0.02	0.16	3.03	1.23
BnaC01G0386300ZS	8.16	6.13	3.19	2.51	2.45	3.72	3.76	6.09	3.17	4.62	10.85	6.78	2.17	2.18	3.31	0.9	9	4.68	4.71	7.27	7.74	12.46	16.58
BnaC05G0382500ZS	0.25	0.43	0.06	0.03	0.12	0	0.08	0.08	0	0.01	0.13	0.23	0.06	0.02	0.09	0.04	1.31	0.89	0.49	0.51	0.36	0.48	0.07
BnaC01G0385300ZS	0	0	0	0	0	0	0	0.03	0	0	0.01	0	0	0	0	0	0	0	0	0	0	0	0
BnaA05G0348600ZS	0	0	0	0	0	0	0	0	0	0	0.02	0.02	0	0	0	0	0	0	0	0	0	0	0
BnaC05G0378600ZS	0	0	0	0	0	0	0	0	0	0	0	0	0	0	0	0	0	0	0	0	0	0	0
BnaA01G0309300ZS	12.07	10.34	7.92	8.32	8.63	10.58	9.58	8.2	3.24	5.79	11.02	7.73	11.96	12.75	11.61	1.11	12.07	6.73	7.12	10.75	6.9	5.95	6.09
BnaC01G0383400ZS	8.55	7.03	4.32	4.17	4.54	5.43	5.48	5.19	2.71	5.39	10.12	6.44	1.75	3.36	2.36	0.83	8.84	6.13	6.51	7.64	6.66	5.84	8.03
BnaA01G0307900ZS	0.29	0.02	0.1	0.22	0.25	0.37	0.68	2.77	0.33	1.4	0.76	5.52	4.56	4.48	6.69	6.49	0.07	0	0.04	0.06	0.08	1.08	2.61
BnaC01G0381800ZS	0.74	1.22	0.14	0.2	0.18	0.61	0.68	3.07	0.07	0.11	0.12	5.77	0.43	1.12	0.85	3.24	0.4	0.09	0.12	0.45	0.25	0.26	0.1
BnaA03G0369200ZS	1.64	3.29	6.09	6.95	6.95	4.67	5.17	4.42	10.76	3.26	1.86	261.74	48.75	19.24	10.79	803.06	7.05	12.22	19.47	1.72	3.4	2	0.68
BnaC03G0450100ZS	0.79	2.7	11.48	10.98	11.42	9.55	7.3	7.36	15.81	4.44	1.87	156.39	29.53	11.6	7.92	494.89	2.39	7.11	7.29	0.88	1.62	1.79	0.86
BnaA05G0338300ZS	7.13	8.02	4.12	3.97	4.89	5.08	6.02	10.35	2.28	3.97	12.98	11.12	26.12	17.55	23.83	0.36	28.31	18.79	26.07	39.12	29.87	21.65	15.57
BnaC05G0361300ZS	5.39	9.63	5.75	5.28	6.34	6.13	5.6	6.32	3.54	3.93	13.3	7.95	14.23	10.26	14.3	0.54	20.36	11.36	15.35	18.57	13.45	7.5	6.67
BnaA01G0301900ZS	0	0	0	0	0	0	0	0	0	0	0	0.02	0.23	0	0.05	0.03	0	0	0	0	0	0	0
BnaC01G0372600ZS	0	0	0	0	0	0	0.02	0	0	0	0.05	4.71	0.15	0.08	0	0.14	0	0	0	0	0	0.01	0.09
BnaA05G0335500ZS	0.16	0.21	0	0.05	0.05	0.08	0.12	0.75	0.02	0	0.09	0	0.89	0.06	0.12	0	0.09	0.15	0.16	0.27	0.05	0	0
BnaC05G0357500ZS	0.12	0	0	0	0.03	0.13	0.17	0.7	0.02	0	0.04	0	0.13	0.07	0	0.17	0	0	0	0	0.05	0.12	0
BnaC05G0356800ZS	0.06	0	0	0	0	0	0	0.03	0	0	0.06	0.03	0.08	0.14	0.05	0.03	0	0.05	0.03	0.13	0	0.02	0.02
BnaA05G0333800ZS	0	0	0.01	0.03	0.02	0.04	0	0.01	0.08	0.01	0.27	0.02	0	0	0.01	0.05	0.07	0.38	0	0	0.01	0	0.01
BnaC05G0354400ZS	0	0.08	0.08	0.13	0.1	0.11	0.14	0.15	0.15	0.05	0.07	0.03	0.03	0.04	0.03	0.17	0.01	0.27	0.02	0.05	0.06	0.07	0.05
BnaC01G0369700ZS	3.07	1.47	0.63	0.57	0.61	0.45	0.44	0.16	1.53	1.46	1.69	0.61	0.09	0.1	0.12	0.03	3.06	1.07	0.64	0.98	0.36	0.12	0
BnaA01G0299500ZS	3.52	2.47	1.15	1.04	1.35	1.07	0.91	0.66	1.57	1.35	2.12	0.64	0.48	0.12	0.49	0.23	6.7	1.09	0.91	0.97	0.41	0.09	0.03
BnaA01G0299300ZS	6.16	12.48	0.46	0.44	0.31	0.33	0.23	0.13	2.21	2.26	4.62	1.31	3.15	1.41	2.22	0	7.18	1.73	2.38	2.75	1.84	0.16	0.02
BnaC05G0354200ZS	7.2	8.8	0.8	0.62	0.53	0.39	0.17	0.11	2.36	3.32	7.44	3.31	0.15	0.17	0.33	0.01	12.59	3.83	4.23	3.88	1.89	0.29	0.13
BnaA01G0298100ZS	1.33	0.67	0.82	0.85	0.66	1.27	1.94	3.76	0.45	2.14	4.61	1.2	2.34	1.28	0.1	0.23	21.29	1.26	0.97	4.51	6.64	17.6	5.8
BnaA03G0374200ZS	0	0	0.08	0.03	0.05	0	0	0.03	0.41	0.88	2.36	0	0	0	0	0	0.05	0	0	0	0	0	0
BnaC05G0178100ZS	0.28	0.41	0.26	0.12	0.11	0.23	0.12	0.31	0.75	0.36	0.13	0.15	0.42	0.2	0.06	0.23	0.17	0.12	0.07	0.49	0.23	0.22	0.04
BnaC05G0351200ZS	21.94	15.67	10.49	9.3	10.35	13.6	14.64	17.9	9.12	7.89	23.1	13.49	16.85	17.52	14.89	2.95	19.9	9.12	10.68	12.95	13.05	18.16	18.58
BnaA01G0292100ZS	0	0	0	0.14	0.05	0.06	0.05	0	0	0	0.09	17.63	3.88	1.38	0.46	46.08	0.13	0.06	0	0	0	0.03	0
BnaA03G0376000ZS	0	0	0	0	0	0.03	0.04	0.05	0	0	0	7.98	0.54	0.44	0.14	12.17	0	0	0	0	0	0	0
BnaA07G0078000ZS	0	0.1	0	0.04	0	0.07	0	0.04	0	0.09	0.07	6.96	0.35	0.24	0	7.38	0	0.08	0	0.28	0.14	0.04	0.02
BnaC01G0358600ZS	0	0	0	0.02	0	0.06	0.04	0	0	0	0	15.92	1.73	1.15	0.14	36.92	0	0.03	0	0	0	0.08	0.05
BnaC03G0460200ZS	0	0	0	0	0.04	0	0	0	0	0	0	8.18	1.42	0.47	0.18	14.87	0	0	0	0	0	0	0
BnaC07G0121000ZS	0.17	0.08	0	0	0	0.08	0	0.05	0.06	0.09	0.25	8.15	1.09	0	0.33	7.86	0.07	0.26	0	0.12	0.19	0.04	0.32
BnaC07G0120500ZS	4.54	1.89	1.69	1.64	0.87	1	0.79	0.28	0.47	1.72	1.6	4.46	1.12	0.02	0.08	5.56	0.31	0.02	0.02	0.02	0.06	0.03	0.07
BnaA03G0376300ZS	9.43	12	8.12	7.5	8.24	8.24	9.64	8.9	3.97	4.95	6.06	8.88	5.54	4.59	8.73	3.54	5.18	1.06	3.66	6.19	3.94	4.31	3.57
BnaC03G0460600ZS	13.43	22.05	8.08	7.63	8.7	12.84	12.65	12.87	5.06	7.66	6.57	8.82	10.53	10.22	14.98	4.23	5.6	3.06	5.11	7.55	6.77	4.92	7.24
BnaA07G0077500ZS	0	0.04	1.32	2.13	1.35	4.16	3.2	0.71	0.04	0	0.45	0.63	0.3	0.36	0.19	0.07	0	0	0.06	0	0.14	0.43	0.17
BnaA01G0290400ZS	14.22	6.89	2.66	3.04	3.33	3.91	4.67	8.62	5.85	6.6	30.51	7.46	3.51	4.98	1.56	0.09	15.13	7.92	8.78	10.82	10.68	8.01	8.23
BnaA07G0068300ZS	0	0	0	0	0	0.02	0.1	0	0	0	0.07	0	0	0	0	0	0.48	0	0	0	0	0	0
BnaA07G0068400ZS	4.69	3.95	2.1	2.43	2.38	3.07	3.97	5.48	4.97	4.68	8.77	5.99	7.73	11.6	8.62	3.15	9.3	3.11	3.89	4.51	4.68	5.59	8.76
BnaC07G0103300ZS	0	0	0	0.04	0	0	0	0.03	0	0	0	0	0	0	0	0	0.28	0	0	0	0	0	0
BnaA03G0383400ZS	23.47	12.95	4.79	4.27	3.69	2.5	0.8	1.23	9.14	13.22	22.48	12.62	0.49	0.35	0.65	0	19.4	17.65	14.01	7.05	3.86	1.41	0.45
BnaC03G0472800ZS	23.43	17.36	5.81	5.17	4.71	3.32	1.47	2.09	10.78	18.19	23.38	13.11	1.3	0.82	1.67	0.03	20.18	20.6	21.65	9.11	6.28	2.37	0.68
BnaC02G0447600ZS	0	0	0	0	0	0	0	0	0	0	0	0	0	0	0.04	0	0	0	0	0	0	0	0
BnaC07G0289600ZS	0	0	0	0	0	0	0	0	0	0	0.21	0.03	0	0	0	0.07	0.01	0	0	0	0	0	0
BnaC07G0289900ZS	0	0	0	0	0	0	0	0	0.18	0.23	0.05	0	0	0	0	0	0	0	0	0	0	0	0
BnaA09G0228700ZS	7.17	4.42	3.63	3.77	4.24	2.97	2.01	1.83	4.32	5.44	15.95	15.59	2	1.98	1.92	0.11	11.72	4.28	5.3	5	3.42	1.71	0.61
BnaC09G0268200ZS	8.82	8.62	9.96	8.85	10.44	8.08	6.75	4.85	11.71	15.12	30.24	15.57	0.32	0.16	0.09	0	19.41	8.02	9.69	9.56	7.01	4.24	1.35
BnaA09G0229600ZS	0	0	0.12	0.11	0.34	0.06	0.12	0	0	0	0	71.32	16.65	4.05	2.61	176.28	0.06	0	0	0	0.03	0	0
BnaC09G0269300ZS	0	0	0.3	0.45	0.29	0.14	0.42	0.29	0	0	0.2	86.54	19.06	7.22	3.91	283.54	0.11	0	0	0	0	0	0.13
BnaA09G0036000ZS	4.12	3.68	4.91	5.41	6.22	7.17	6.59	6.93	3.4	2.28	1.4	1.25	6.34	5.38	6.93	1.18	1.5	3.49	2.6	4.42	9.28	10.96	7.97
BnaC09G0021400ZS	3.16	3.22	2.56	2.94	3.27	4.31	4.38	5.32	2.71	1.86	1.85	1.96	15.8	19.8	17.92	2.07	1.19	0.5	0.42	2.6	4.41	6.85	11.15
BnaA06G0389000ZS	0	0	0.06	0.01	0	0	0	0	0.2	0.12	3.94	0.69	0	0	0.03	0.07	1.59	0	0	0	0	0	0
BnaC07G0298100ZS	0	0	0	0	0	0	0	0	0.49	0.36	5.56	0.89	0	0	0	0.04	0.98	0	0	0	0	0	0
BnaA06G0386400ZS	0	0.33	1.5	0.42	0.85	0.81	0.43	0.17	20.64	19.1	17.14	1.94	3.32	1.71	0.14	0	3.07	5.24	13.16	1.75	2.31	0.13	0.18
BnaA09G0037500ZS	0.09	0.05	0.04	0	0	0	0.18	0	1.51	1.77	1.33	0.02	0.07	0	0	0	0.63	0.8	1.28	0.29	0.6	3.48	2.33
BnaC09G0022900ZS	0.11	0.18	0.03	0	0.03	0.03	0	0	5.39	4.42	2.19	0	0.07	0	0	0	1.34	0	0	0.03	0.06	0.4	0.51
BnaA06G0381800ZS	1.05	1.31	0.45	0.59	0.61	0.76	0.56	0.32	2.06	0.98	0.88	0.35	0.02	0.01	0	0	1.64	0.66	0.24	0.24	0.18	0.01	0
BnaC07G0307300ZS	0.3	0.57	0.69	0.72	0.79	0.57	0.49	0.17	0.48	0.81	2.01	0.22	0	0.04	0	0	1.72	0.24	0.54	0.41	0.07	0.01	0.02
BnaA06G0380800ZS	0	0.03	0	0	0	0	0	0.2	0.02	0	0.42	308.7	38.43	51.79	56.36	44.47	0.03	0.03	0.28	0	0	0.05	0.06
BnaA09G0040300ZS	0	0	0	0	0	0	0	0.11	0	0.02	0.16	153.95	2.37	3.35	5.78	59.18	0	0.13	1.05	0	0	0	0
BnaC07G0309800ZS	0	0	0	0	0	0	0	0.2	0	0	0.21	276.32	26.04	43.62	43.62	52.8	0.02	0.05	0.1	0	0	0	0
BnaC09G0025700ZS	0	0	0	0	0	0.04	0	0.14	0	0	0.2	162.35	6.12	1.57	8.9	64.33	0	0.45	3.35	0	0.06	0	0
BnaA06G0369700ZS	0	0	0	0	0	0	0	0.19	0	0	0.44	0	0	0	0	0	0	0	0	0	0	0	0
BnaC08G0401100ZS	0	0.06	0	0	0	0	0	0	0	0	0	0	0	0	0	0	0	0	0	0	0	0	0
BnaA06G0188800ZS	7.38	7.04	3.33	3.18	3.53	4.75	4.88	6.31	2.63	3.75	7.97	4.45	5.64	7.34	5.84	0.93	6.87	2.88	3.5	4.78	4.66	4.94	5.56
BnaC03G0597900ZS	9.14	6.97	4.06	3.71	3.04	3.33	3.99	6.05	4.45	4.53	8.44	4.47	4.39	6.11	4.18	1.17	6.91	3.29	3.71	4.38	4.57	4.18	6.84
BnaA06G0257000ZS	0.91	0.1	0.19	1.23	1.5	0.39	0.03	0.52	0	0.84	0.57	0.01	11.75	5.53	49.38	0.01	0.58	0.09	0.02	0.05	0.34	1.64	0.22
BnaC03G0579500ZS	1.83	0.23	0.29	2.01	1.91	0.27	0.06	0.53	0.08	1.13	0.82	0.05	10.98	8.25	60.46	0.02	1.48	0.06	0.07	0	0.14	0.26	0.13
BnaA05G0115600ZS	20.14	17.38	11.5	11.29	12.23	16.44	14.8	13.89	7.17	7.04	7.82	15.18	16.74	20.03	18.57	19.79	9.75	5.86	8.16	10.6	9.46	11.6	13.82
BnaA01G0234400ZS	6.38	4.15	2.39	2.5	2.93	4.53	6.12	18.28	1.74	1.82	3.45	2.92	6.31	3.02	3.54	0.22	4.56	7.39	20.12	7.3	7.55	19.63	18.03
BnaC04G0148200ZS	9.03	8.18	5.1	5.02	5.44	5.92	5.86	6.4	3.32	3.87	5.85	7.77	8.64	12.15	10.16	4.32	4.7	3.02	4.73	4.8	5	6.09	6.47
BnaA06G0258500ZS	0	0	0.09	0.1	0.07	0.08	0.15	0.19	0	0	0.05	85.59	2.08	0.75	0.35	46.84	0.02	0	0	0	0	0	0
BnaC03G0587100ZS	0	0	0.07	0.04	0	0	0.04	0.02	0	0	0.02	87.29	2.18	0.95	0.57	43.32	0.02	0	0	0	0	0	0
BnaA03G0592000ZS	9.87	6.74	2.1	1.77	2.67	2.46	3.26	5.06	5.6	9.87	11.43	4.62	3.59	3.66	2.5	0	8.56	5.33	3.94	6.32	5.85	3.85	3.71
BnaC04G0248600ZS	0	0	0	0	0	0	0	0	0	0	0	0	0	0	0	0	0	0	0	0	0	0	0
BnaA09G0152600ZS	31.73	19.18	19.45	17.84	19.43	16.29	19.12	27.59	38.88	17.99	61.13	29.71	14.72	14.44	13.94	0.17	35.04	20.07	24.17	25.64	31.66	17.34	19.99
BnaC09G0166800ZS	13.06	9.83	6.44	8.11	8.49	6.65	7.28	11.03	21.8	13.36	25.61	11.95	8.86	9.32	7.52	0.57	14.76	8.79	13.93	13.28	16.22	11.22	9.84
BnaA06G0175400ZS	66.67	82.76	132.03	131.26	133.79	172.99	156.69	145.13	32.87	12.15	15.14	31.32	7.11	14.33	8.81	24.37	6.36	13.03	4.58	10.73	13.6	18.85	8.96
BnaC03G0619100ZS	82.55	88.43	146.78	146.11	143.77	176.49	151.46	139.1	36.75	14.09	14.82	32.4	10.4	26.31	16.11	17	4.83	7.72	2.14	7.61	10.39	10.04	4.65
BnaA06G0171800ZS	0	0	0	0	0	0	0.02	0	0	0	0.56	0.17	0	0	0	0.25	0.11	0	0	0	0	0	0
BnaC03G0623500ZS	0	0	0	0	0.06	0.02	0	0	0	0	0.6	2.22	0.17	0.11	0.07	5.35	0.02	0.5	0	0	0	0	0
BnaA06G0264700ZS	14.34	6.57	4.39	4.08	4.43	5.74	5.94	6.35	2.57	2.59	5.58	2.81	6.24	7.28	6.36	0.55	6.03	3.02	3.15	4.16	3.72	5.87	3.16
BnaC03G0570500ZS	15.42	12.81	9.14	9.13	10.11	12.35	13.9	14.51	5.09	4.9	8.81	6.58	13.03	14.95	12.85	2.54	11.36	7.23	7.05	9.83	10.08	16.09	11.92
BnaA01G0222200ZS	9.89	8.61	2.55	2.66	2.7	1.61	0.59	0.43	5.74	5.34	11.23	4.52	0	0.03	0.1	0	24.43	8.5	9.95	9.44	4.51	0.29	0.01
BnaA06G0157600ZS	9.48	8.66	7.73	7.57	7.96	9.93	10.61	11.02	3.34	4.67	8.56	5.83	5.96	6.58	6.35	1.32	9.71	7.66	8.12	9.97	6.7	7.78	6.2
BnaC08G0298100ZS	7.83	6.38	5.68	5.31	5.37	7.07	8.43	9.88	3.25	4.73	9.37	7.19	6.02	7.62	5.88	5.27	11.56	5.11	6.12	6.3	5.85	6.98	5.92
BnaA06G0270100ZS	5.51	4.07	2.06	1.28	1.44	1.73	1.99	2.62	1.01	1.08	7.21	2.86	8.07	10.73	8.92	0.45	3.65	1.09	1.14	1.82	1.65	2.57	1.51
BnaA03G0413000ZS	0.63	1.15	3.58	3.25	2.98	3.53	2.46	1.87	0.94	3.28	4.91	3.17	0.43	1.01	0.11	0	6.8	11.22	13.71	22.8	4.36	0.34	0.06
BnaC07G0384900ZS	7.35	6.96	22.42	20.25	19.95	15.19	8.75	3.88	13.83	18.34	35.06	34.86	0.67	3.92	0.86	0.13	29.76	16.64	13.8	32.03	9.19	0.51	0.23
BnaA01G0213600ZS	0	0	0	0	0	0	0	0	0	0	0.43	0	0	0	0	0	0	0	0	0	0	0	0.02
BnaA09G0470000ZS	0.72	0.28	0	0	0	0	0	0.1	0	0	0.51	0	0	0	0	0	0	0	0	0	0	0	0
BnaC08G0305100ZS	0	0	0	0	0	0	0	0	0.04	0.02	0.15	0	0	0	0	0	0	0	0	0	0	0	0
BnaA03G0417500ZS	0.05	0	0	0	0.02	0	0	0	0	0.16	1.12	0.89	0	0	0	0	0.2	0	0	0	0	0	0
BnaC07G0390000ZS	0.26	0.12	0.1	0.1	0.02	0.15	0.02	0	0.02	0.24	1.45	0.3	0	0	0	0	0.45	0	0	0	0	0	0
BnaA01G0209200ZS	0.89	0.33	0	0	0	0.24	0.57	0.98	0.16	0.89	1.79	1.33	0.09	0.25	0.26	0	0.63	0	0	0.14	0.15	0.29	0.15
BnaA05G0132500ZS	0.73	0.03	0.03	0	0.08	0.02	0.03	0.17	0.07	0.06	0.55	0.18	0.47	0.04	0.37	0	0.07	0.1	0.06	0.18	0.07	0.12	0.07
BnaA09G0477800ZS	9.14	1.4	0.39	0.18	0.13	0.18	0	0	0.26	1.83	6.14	8.38	1.74	3.03	2.13	0.79	32.39	16.13	15.05	29.04	9.92	0.14	0.07
BnaC07G0392700ZS	17.88	3.87	0.06	0.11	0.16	0.28	0.07	0	0.11	1.13	0.06	6.8	0.79	0.26	0.07	9.57	0.23	7.98	7.02	3.05	2.91	0	0
BnaC08G0315500ZS	1.23	0	0.07	0	0	0	0	0	0	0.3	27.17	4.2	0.05	0	0.12	0.33	0.33	0	0.06	0.24	0.19	0	0.02
BnaC01G0259600ZS	10.71	6.9	3.22	2.92	3.12	2.75	2.32	1.85	8.18	11.61	3.22	2.97	1.2	1.2	1.5	0.05	6.64	3.7	4.76	5.57	3.48	3.56	3.24
BnaA09G0481100ZS	0	0	0	0	0	0.05	0.04	0	0.06	0	377.75	0	0	0	0	0	0	0	0	0	0	0	0
BnaC08G0317700ZS	0	0	0.58	0.37	0.25	0.48	0.1	0.02	0.05	0.5	338.09	0	0	0	0.05	0	0.13	0.15	0.24	0.99	0.09	0.05	0
BnaA09G0481300ZS	0	0	0	0	0	0	0	0	0	0	0.02	0	0	0	0	0	0	0	0	0	0	0	0
BnaC01G0259100ZS	32.76	22.61	10.97	11.14	15.32	13.64	11.55	13.39	14.66	13.51	33.27	13.34	14.29	14.42	13.14	0.89	34.48	17	18.08	29.97	31.66	22.26	20.2
BnaA01G0206100ZS	20.85	14.72	8.03	7.9	9	8.36	8.29	7.16	8.31	9.35	16.86	9.96	9.63	11.15	8.49	0.4	22.89	9.72	10.65	16.18	17.08	13.63	11.16
BnaA03G0423500ZS	0	0.02	0	0.01	0	0	0	0.01	0.03	0	0	3.81	0.21	0.07	0.01	2.89	0.03	0	0.01	0.02	0	0	0
BnaC07G0396800ZS	0	0	0	0	0	0	0.03	0	0	0	0	4.8	0.17	0.04	0.02	3.4	0	0	0	0	0	0	0
BnaA03G0424200ZS	3.89	3.79	2.62	2.3	3.29	4.44	3.94	5.2	3.16	4.16	3.73	2.91	4.12	5.16	4.75	2.58	3.51	2.66	3.45	4.12	3.04	5.11	7.23
BnaA09G0486800ZS	6.6	7.03	5	5.24	5.61	8.3	8.14	8.63	5.22	5.28	5.99	5.45	9.13	11.79	8.23	3.26	5.21	4.03	4.19	5.7	4.68	8.72	10.56
BnaC07G0397600ZS	10.58	8.47	5.51	5.61	5.85	8.09	8.82	9.7	7.64	7.51	7.2	5.67	9.16	12.66	9.29	7.35	7.52	5.6	5.43	6.32	5.47	10.88	14.43
BnaC08G0324200ZS	8.1	6.81	5.23	5.26	5.62	7.36	8.36	8.67	6.64	6.09	6.26	4.72	10.15	13.89	9.02	4.9	5.4	4.29	3.9	5.64	4.82	8.85	10.45
BnaA04G0065400ZS	98.21	97.21	53	50.04	52.11	65.52	56.8	59.73	43.47	63.2	71.32	68.61	26.12	30.32	28.3	20.65	59.72	47.8	45.86	62.92	72.33	53.58	49.54
BnaA09G0489400ZS	139.83	139.98	70.63	66.93	62.26	77.89	77.92	82.68	86.85	114.36	82.53	88.8	64.9	67.25	72.83	43.46	77.91	76.69	73.21	105.57	126.91	102.46	93.99
BnaC04G0344800ZS	92.78	90.94	35.13	36.56	30.01	45.52	39.8	40.57	35.39	47.82	54.79	49.3	58.35	61.01	78.64	8.95	50.17	32.35	44.63	49.79	49.49	40.02	32.96
BnaC06G0143700ZS	40.45	42.71	27.76	30.56	27.38	32.25	34.48	34.96	25.77	34.33	31.34	34.01	45.66	37.04	39.63	19.06	43.54	29.97	32.07	46.5	51.38	43.52	35.11
BnaC08G0327800ZS	89.69	101.73	55.42	51.72	49.78	63.08	64.19	68.56	69.33	83.32	62.39	63.4	140.42	149.19	172	41.16	58.32	57.48	49.87	88.49	119.84	87.93	89.64
BnaA09G0492100ZS	1.24	2.43	0.19	0.28	0.24	0.09	0.11	0.02	5.8	2.16	12.37	0.25	0	0	0	0	9.02	0.21	0.12	0	0	0	0
BnaC08G0330700ZS	0.02	0.06	0	0.02	0	0.02	0	0	1.49	1.29	9.48	0.34	0	0	0	0.04	3.42	0.32	0.04	0	0	0	0
BnaA07G0182200ZS	4.68	3.13	2.05	2.6	2.4	1.77	0.67	0.72	6.6	6.67	9.42	3.84	0.36	0.33	0.82	0	11.96	5.19	5.21	5.94	3.47	1.21	0.42
BnaC06G0180300ZS	3.78	2.74	1.64	0.99	1.4	0.97	0.58	0.21	7.29	5.32	6.09	2.74	0.08	0.03	0.18	0	8.35	2.6	2.9	2.88	1.8	0.36	0.02
BnaA10G0111300ZS	0	0	0	0	0	0	0	0	0	0	0	0	0	0	0	0	0	0	0	0	0	0	0
BnaC05G0072800ZS	0	0	0	0	0	0	0	0	0.02	0	0	0	0	0	0	0	0	0	0	0	0	0	0
BnaC08G0336700ZS	0.58	0.2	0	0.03	0.06	0	0.01	0.01	0	0.01	0.61	0.5	0.05	0.02	0.11	0.1	0.6	0	0.02	0.02	0	0	0
BnaA02G0261300ZS	3.68	4.37	1.88	1.48	2.28	2.09	1.72	1.39	2.16	2.82	1.43	1.26	0.35	0.68	0.49	0	3.45	1.57	1.74	3.52	1.61	0.75	0.12
BnaA07G0185800ZS	0	0	0	0	0	0	0	0	0	0	0	0	0	0	0	0	0	0	0	0	0	0	0
BnaA04G0050100ZS	0	0.02	0	0	0	0	0	0.03	0	0	0.6	0	0.04	0.03	0	0	0	0	0	0	0	0.1	0.06
BnaA09G0501500ZS	0.85	0.78	0.81	1.06	1.59	3.46	5.86	7.05	0.36	0.1	0.37	0.03	29.51	8.88	4.11	0	0.07	4.92	13.96	2.17	5.7	85.72	243.34
BnaC04G0327300ZS	0	0	0	0	0.07	0	0	0	0	0.02	0	0	0.78	0	0.03	0	0.11	0	0	0	0	0	0.14
BnaC08G0342100ZS	11.88	11.99	15.11	15.64	18.4	41.68	62.93	110.48	10.95	5.31	9.23	1.45	101.53	44.67	22.97	0.05	2.92	64.75	156.48	38.45	60.66	282.12	445.4
BnaA09G0501800ZS	16.91	8.44	9.36	8.87	8.55	10.5	11.13	13.1	4.86	4.66	11.65	15.27	14.56	15.19	13.85	5.5	9	9.53	10.73	3.52	4.28	5.17	3.5
BnaC08G0342400ZS	14.23	11.29	20.12	19.52	19.7	25.22	29.85	27.92	6.89	4.63	9.5	49.33	13.9	11.94	9.3	55.87	5.39	8.89	19.88	10.36	10.39	12.07	7.69
BnaA04G0048500ZS	27.72	26.86	15.57	15.94	15.03	17.73	17.92	20.07	10.3	15.22	15.07	15.86	24.54	19.85	27.7	9.17	19.23	16.07	19.41	25.22	26.65	24.1	23.79
BnaA07G0187900ZS	32.3	34.59	31.06	32.42	31.39	32.72	30.55	29.89	18.82	26.58	18.69	33.36	40.21	41.45	42.99	13.77	24.86	32.24	31.78	44.12	44.66	41.31	35.65
BnaA09G0502900ZS	4.11	1.88	3.56	2.6	3.09	5.82	5.06	7.26	1.89	3.21	2.03	2.25	16.84	8.78	17.4	0.19	2.34	1.66	1.93	3.38	5.81	6.8	9.31
BnaC04G0325500ZS	19.32	14.22	6.61	6.38	6.45	7.64	7.96	7.2	5.75	4.66	5.68	6.8	7.29	8.22	9.18	0.5	13.17	5.17	6.45	11.28	8.52	4.11	3.18
BnaC06G0188600ZS	30.9	30.13	23.56	21.59	21.81	27.65	29.41	25.88	13.7	20.68	12.53	23.52	65.28	72.86	72.72	13.63	19.23	21.36	19.84	32.46	31.55	29.18	23.36
BnaA04G0048400ZS	0	0	0	0	0	0.06	0	0.57	0.17	0.11	90.05	104.39	5.57	190.17	120.16	7.2	3.12	0	0	0	0	0	0
BnaC04G0325300ZS	0	0	0	0	0.06	0	0	1.58	0.17	0.66	84.39	92.71	4.13	110.61	100.37	3.28	1.31	0	0	0	0	0	0.04
BnaC08G0343800ZS	0	0.02	0	0.02	0.06	0.04	0	1.46	0	0	172.85	172.7	2.87	253.53	106.73	20.87	0.3	0.29	0.29	0.75	0.2	0	0
BnaC08G0344400ZS	0.06	0.06	0.09	0.06	0.02	0.18	0	0.91	0.3	0.13	0	0.04	0.28	0.15	0.43	0	0	0.78	0.02	0	1	5.55	8.84
BnaA09G0503700ZS	3.32	3.01	2.38	2.35	1.92	3.01	4.2	5.05	2.13	2.12	3.08	1.31	0	0.03	0.02	0.03	2.11	1.18	0.91	1.91	1.14	1.14	0.08
BnaC08G0345200ZS	0	0.21	0.16	0	0	0	0.11	0	0.01	0.67	0	0	0	0	0	0	1.04	1.01	0	0.46	0.41	0	0.09
BnaA04G0047300ZS	6.64	5.23	5.05	4.72	4.72	5.84	5.29	5.13	3.79	3.68	6.49	4.58	2.42	3.17	2.47	0.27	5.43	2.57	3.48	3.43	2.93	2.63	1.63
BnaA07G0189700ZS	21.6	11.9	2.92	2.32	1.66	1.23	2.7	4.33	12.77	22.4	8.94	6.1	6.63	4.97	3.41	0.34	22.33	73.01	39.91	38.85	68.42	28.61	79.12
BnaA09G0506500ZS	40.65	28.55	1.82	1.77	1.88	1.78	4.43	5.81	11.93	27.24	13.02	10.95	13.27	2.14	3.42	0.07	24.36	49.68	42.97	29.84	49.4	92.73	151.27
BnaC04G0320200ZS	11.38	17.41	4.54	3.69	3.71	4.77	18.42	9.69	11.28	15.65	5.9	4.9	13.15	5.91	9.62	0.15	12.33	15.6	13.1	16.72	26.67	118.57	107.29
BnaC06G0191000ZS	28.25	10.61	2.02	1.69	1.31	1.51	5.69	11.74	7.82	24.2	8.94	3.89	32	16.4	16.1	0.16	12.38	29.29	33.53	38.43	38.85	42.94	53.37
BnaC08G0347800ZS	46.67	34.05	1.9	1.64	1.64	2.32	6.01	8.59	10.84	23.03	10.52	8	3.75	0.78	1.39	0.06	20.97	25.79	34.11	25.93	37.3	68.72	94.42
BnaA04G0045500ZS	11.12	8.44	3.89	3.65	3.22	4.66	22.81	9.91	16.88	18.7	4.16	4.36	5.7	0.82	1.59	0	11.05	21.93	10.24	7.81	22.45	168.2	177.55
BnaA07G0191200ZS	4.28	3.46	0.89	1.05	1.05	0.78	0.82	1.01	4.25	3.88	8.08	2.22	0.33	0.67	0.24	0.02	7	2.89	3.04	2.98	2.51	1.47	0.59
BnaA09G0509300ZS	9.81	7.3	2.8	2.57	3.5	2.68	2.7	3.03	6.69	7.14	15.89	5.19	1.58	3.17	1.19	0.06	9.65	5.74	6.41	7.13	6.39	4.05	4.14
BnaC02G0227700ZS	0	0	0	0	0	0	0.03	0	0.06	0.02	0	0	0	0	0	0	0.02	0.07	0.01	0	0	0	0
BnaC06G0193300ZS	3.68	2.2	0.64	0.44	0.88	0.58	0.91	1.25	3.5	3.69	5.78	1.3	0.22	0.31	0.07	0	4.2	1.48	1.66	2.28	1.71	1.3	1.21
BnaC08G0350400ZS	6.43	4.78	1.94	2.36	2.89	2.27	2.08	2.95	7.53	8.62	13.28	3.76	0.71	0.61	0.25	0	8.34	4.41	5.22	6	4.8	2.54	2.65
BnaA04G0041800ZS	0	0	0	0	0	0	0	0	0	0	0	0	0	0	0	0	0	0	0	0	0	0	0
BnaA09G0511800ZS	6.68	6.82	8.21	8.74	8.5	7.67	8.2	10.36	11.75	11.46	18.54	7.51	4.3	4.83	1.68	0.09	13.7	6.39	10.2	6.25	4.83	4.97	3.58
BnaC04G0316200ZS	0.02	0	0	0.01	0	0.02	0	0	0	0	0.01	0	0	0.01	0	0	0	0	0.02	0	0	0	0
BnaC08G0353400ZS	6.17	6.83	8.09	8.82	8.26	6.06	6.3	7.6	10.52	12.17	17.86	7.3	3.69	2.39	1.32	0.02	14.86	6.68	10.46	6.01	3.93	3.54	2.52
BnaA09G0512700ZS	8.29	5.13	1.76	1.73	1.9	2.19	1.94	3.79	3.07	3.17	16.21	4.16	1.69	3.29	0.77	0.06	7.85	3.81	4.15	4.51	4.45	5.3	4.52
BnaC04G0315100ZS	0	0	0	0	0	0	0	0	0	0	0.14	0	0	0	0	0	0.13	0.03	0.01	0.02	0	0	0
BnaC08G0354600ZS	9.68	5.22	2.13	1.88	2.02	2.15	2.07	5.01	3.51	3.31	15.33	3.9	0.91	2.02	0.33	0.02	8.4	4.02	4.28	4.51	4.47	7.1	5.4
BnaA04G0040200ZS	15.45	10.56	8.44	8.69	7.88	9.78	9.95	11.85	20.63	22.05	11.95	41.44	5.2	1.75	1.89	0.63	14.03	6.88	8.8	11.87	14.22	9.6	4.18
BnaA09G0513600ZS	6.93	5.17	5.93	7.07	8.38	7.02	5.42	5.21	15.15	5.26	14.71	68.76	3.58	3.57	3.36	1.44	7.78	3.35	3.63	4.44	3.24	6.23	3.8
BnaC04G0313900ZS	24.98	15.21	13.75	13.52	15.16	17.29	18.16	21.91	29.36	15.2	17.97	9.35	7.96	7.21	4.51	1.11	21.62	16.11	13.17	23.11	24.41	32.06	15.35
BnaC08G0355700ZS	22.74	13.45	15.89	15.67	19.59	21.99	19.35	20.52	17.02	8.74	22.26	105	20.21	20.96	22.46	3.84	11.78	6.71	8.76	13.32	15.79	16.31	14.98
BnaA09G0514800ZS	22.23	15.59	7.66	7.83	8.38	8.54	7.87	8.88	5.85	8.46	12.23	14.58	8.76	9.9	8.74	2.44	18.9	12.79	18.01	17.37	13.64	11.16	6.14
BnaC04G0313000ZS	19.03	12.33	4.11	4.62	5	5.26	4.16	5.99	3.57	8.46	18.43	8.66	9.83	6.64	7.15	0.29	8.31	6.69	6.35	10.22	4.84	3.87	5.97
BnaC08G0357000ZS	116.33	73.69	24.91	28.49	28.54	36.38	28.48	22	25.46	29.84	32.09	37.88	18.11	18.26	24.33	11.52	68.33	42.86	40.82	50.16	32.95	19.75	10.16
BnaA04G0033100ZS	0	0	0.01	0	0	0	0	0	0.01	0	0.02	12.75	0.25	0.09	0.06	5.06	0.01	0	0	0	0	0	0.01
BnaA07G0197400ZS	0	0	0	0	0	0	0.01	0.01	0	0	3.54	0	0	0	0	0.01	0	0	0	0	0.02	0.02	0.02
BnaA09G0525100ZS	12.35	6.6	3.4	3.65	3.53	4.01	4.34	5.93	5.83	5.14	17.22	4.97	1.93	2.87	1.69	0.39	7.95	3.97	5.91	5.57	3.95	6.27	8.55
BnaC06G0202300ZS	0.48	0.41	0.13	0.11	0.11	0.2	0.12	0.35	0.02	0.01	3.77	0.27	0.03	0.01	0.03	0	0.31	0.12	0.17	0.09	0.15	0.08	0.08
BnaC08G0368500ZS	13.3	7.95	3.94	4.26	4.29	5.62	6.19	7.43	4.68	5.09	24.68	7.33	4.46	5.66	2.97	0.55	10.22	5.18	7.61	7.6	6.42	7.17	9.19
BnaA09G0526500ZS	0.47	0.21	0.58	0.15	0.34	0.11	0.14	0.31	0.1	0.17	1.05	3.28	3.69	3.02	9.45	0	0	0	0	0	0	0	0.02
BnaC08G0370100ZS	0.28	0.49	0.46	0.25	0.15	0.07	0.06	0.05	0	0.32	1.65	3.33	5.81	3.23	15.8	0	0.05	0	0	0.02	0.03	0	0
BnaA01G0039600ZS	8.66	1.5	0.87	1.01	1.12	1.96	3.75	4.03	2.53	1.9	1	0.19	0.38	0.34	1.42	0.53	0.1	0.06	0.29	0.1	0.28	0.82	1.23
BnaA03G0543200ZS	11.75	6.4	1.95	1.63	1.76	3.25	3.91	4.25	2.96	1.91	6.24	0.62	0.23	0.61	1.95	0.9	1.27	0.63	0.7	0.89	0.72	2	8
BnaC01G0045300ZS	8.85	1.03	1.54	1.54	2.47	4.07	4.72	7.24	4.89	4.83	1.64	0.59	0.3	0.13	0.84	1.15	0.06	0.06	0.01	0.05	0.09	0.27	2.6
BnaC07G0519400ZS	13.15	10.7	3.07	2.19	3.04	5.12	4.4	3.95	3.79	3.32	3.3	0.49	0.21	0.83	1.35	0	2.11	0.51	0.73	0.67	1.32	1.71	12.72
BnaA04G0029700ZS	32.87	22.92	14.7	13.84	15.01	19.7	21.88	21.93	10.56	5.95	13.55	11.82	3.14	3.27	1.79	3.75	22.08	16.54	18.91	21.75	16.15	16.97	7.54
BnaA09G0527900ZS	8.55	8.31	7.25	7.57	8.16	10.31	9.76	8.69	5.93	6.9	8.98	6.05	5.82	6.98	5.45	1.83	9.85	5.16	5.34	6.38	4.91	7.83	6.96
BnaC04G0300200ZS	2.56	1.48	0.52	0.76	0.74	0.91	0.92	0.83	0.81	0.62	1.61	1.03	0.98	1.85	0.67	0.2	1.71	0.47	0.8	1.48	0.77	1.1	0.98
BnaC08G0372200ZS	8.69	8.45	5.72	5.89	6.16	7.68	7.48	7.72	4.9	5.95	10.07	7.79	5.93	8.47	6.54	2.9	10	5.19	6.43	7.29	4.79	7.12	8.36
BnaC08G0373400ZS	17.24	13.3	11.48	10.82	11.07	15.64	14.94	16.67	36.18	22.84	8.96	12.43	28.77	26.03	27.9	3.02	11.6	16.11	22.66	11.95	12.56	17.77	30.12
BnaA07G0199500ZS	0.04	0	0	0.02	0.02	0.08	0	0	0	0	1.08	4.46	0.02	0	0.03	0.13	0.02	5.66	14.2	89.6	86.87	58.96	325.87
BnaA09G0529600ZS	0	0	0.03	0.08	0.06	0.06	0.12	0	0	0	0.08	5.32	0.28	0.17	1.09	3.7	0.06	0	0	0	0	2.71	318.95
BnaC08G0374200ZS	0.58	8.16	0.03	0	0.01	0.03	0	0	0	0	0.03	3.64	0.02	0	0.15	0.32	0	0	0	0	1.08	19.33	57.74
BnaC06G0206500ZS	0.16	0.16	0	0	0.04	0	0.01	0	0.06	0.01	0.37	2.74	0.01	0	0.2	0.07	0.01	0.11	0.38	1.98	3.28	4.99	45.98
BnaA04G0028100ZS	1.12	0.72	0.25	0.19	0.08	0.14	0.08	0.04	0	0.05	1.23	1.33	0.06	0.4	0.3	0.06	0.96	0.06	0.08	0.02	0	0.13	0.02
BnaA07G0200400ZS	2.85	4.59	0.36	0.25	0.26	0.33	0.06	0.07	0.07	1.05	0.16	0.52	0.22	0.21	0.92	0	0.54	0.29	0.36	0.27	0.11	0.15	0.09
BnaA09G0530900ZS	3.5	2.2	0.7	0.64	0.4	0.38	0.23	0.16	0.56	1.55	4.44	4.73	0.24	0.29	0.61	0.04	2.53	0.61	0.64	0.69	0.49	0.36	0.11
BnaC08G0376700ZS	10.6	7.95	2.7	2.44	1.86	1.85	1.42	0.52	0.99	2.8	10.24	6.81	0.57	0.55	0.95	0.05	6.29	2.01	1.76	4.19	1.54	0.8	0.09
BnaA09G0533800ZS	0	0	0	0.05	0.05	0.03	0.03	0	6.67	1.59	1.88	0.35	0	0.16	0.12	0	2.8	0	0	0	0	0	0
BnaC06G0211000ZS	0.03	0	0	0	0	0	0	0	0.04	0.15	0	0	0	0	0	0	0	0	0	0	0	0	0
BnaA07G0202300ZS	0	0	0.06	0	0.02	0	0	0	0.52	0.14	0.16	0.02	0	0	0	0	0.06	0	0	0	0	0	0
BnaC04G0293300ZS	1.16	1.29	2.59	2.27	3.02	2.64	2.29	1.37	2.57	1.21	0.88	3.99	0.42	0.23	0.26	5.47	1.45	0.73	1.14	1.64	0.77	0.38	0.05
BnaC06G0212100ZS	0.36	0.29	0.13	0.07	0.12	0.16	0.09	0.08	0.24	0.25	0.43	2.73	0.31	0.17	0.16	2.79	0.67	0.16	0.15	0.28	0.14	0.01	0.01
BnaA07G0206700ZS	3.91	7.6	0.01	0.01	0	0.07	0	0	0.01	0.11	0.15	0.17	0	0	0.03	0.03	5.37	0.04	0.06	0.97	1.71	0	0
BnaC06G0216900ZS	0.27	0.18	0.2	0.12	0.19	0.24	0.19	0.24	0.04	0.01	0	0.07	0.62	0	0.42	0.06	2.01	0.01	0	0.06	0.03	0.03	0
BnaA09G0541300ZS	0.59	0.79	1.69	1.57	1.37	1.19	0.85	0.7	3.85	4.24	8.17	5.71	0.53	1.73	0.96	0.07	6.11	2.8	2.46	2.27	0.83	0.42	0.21
BnaC08G0388200ZS	0.56	0.83	2.57	2.14	2.19	1.87	1.24	0.91	4.36	4.76	9.44	6.13	0.28	1.62	1.03	0.06	6.05	2.85	2.95	3.07	0.65	0.1	0.29
BnaA04G0020700ZS	0.88	0.48	0.27	0.23	0.41	0.57	0.73	0.79	0.8	0.74	156.02	15.96	0.23	0.31	0.36	2.05	41.95	1.08	0.43	0.23	0.03	0.04	0.12
BnaA09G0542300ZS	0.28	0.24	0.03	0.1	0.13	0.15	0.11	0.09	0.12	0.16	60.1	0	0.02	0	0	0.02	0.17	0.92	0.13	0.19	0.16	0.44	0.14
BnaC04G0286000ZS	3.56	2.66	0.59	0.4	0.54	0.38	0.21	0.23	0.6	0.74	96.24	12.42	0.21	0.57	0.81	1.81	18.23	2.35	1.41	0.6	0.22	0.19	0.33
BnaC08G0389000ZS	0.12	0.04	0.05	0.06	0	0.03	0.02	0.06	0	0	51.26	0	0.03	0.07	0.02	0	0.08	0.13	0	0.02	0	0.02	0
BnaC01G0438200ZS	0	0	0.06	0.08	0.04	0	0	0	0.11	0.12	0	0	0.13	0.18	0.14	0	0	0	0	0	0.05	0.24	0
BnaA09G0542600ZS	0.57	0.48	0.11	0.1	0.15	0.03	0.02	0	0.33	0.46	4.36	2.02	0.23	0.05	0.08	2.19	3.44	0.16	0.24	0.21	0.04	0	0
BnaA04G0020100ZS	18.97	16.19	12.62	13.61	13.67	12.72	10.71	9.55	18.14	12.58	21.56	17.25	8.03	12.08	17.29	0.4	26.91	12.48	14.76	18.41	14.36	8.32	5.38
BnaC04G0283000ZS	16.93	13.84	7.42	8.14	7.88	8.06	7.87	6.77	11.54	8.57	17.56	18.67	17.03	18.83	32.26	0.45	26.82	13.77	15.73	16.67	13.72	12.2	18.13
BnaC08G0390900ZS	0	0	0	0	0	0	0	0	0	0	0.05	0	0	0	0	0	0.04	0	0	0	0	0	0
BnaA07G0209500ZS	0	0	0	0	0	0	0	0	0	0	0.02	0	0	0	0	0	0	0	0	0	0	0	0
BnaC06G0221000ZS	0	0	0	0	0	0	0	0.03	0	0	0	0	0	0	0	0	0.01	0	0	0	0	0	0
BnaA04G0016300ZS	8.79	5	0.93	1.23	1.38	1.66	1.82	2.49	2.76	3.22	14.8	3.08	1.92	2.04	0.52	0	7.86	12.87	4.45	4.59	5.88	5.59	5.36
BnaA07G0211900ZS	0	0	0	0	0	0	0	0	0	0	0.02	0	0	0	0	0	0	0	0	0	0	0	0
BnaC06G0223400ZS	0	0	0	0	0	0	0	0	0	0	0	0.02	0	0.03	0	0.02	0	0	0	0	0	0	0
BnaA04G0014000ZS	4.15	2.75	0.95	0.84	0.88	0.62	0.41	0.33	2.39	2.77	4.61	4.61	0.44	1.03	0.83	0.16	6.78	2.11	2.49	2.3	1.34	0.48	0.18
BnaA09G0551900ZS	0	0	0	0	0	0	0	0	0	0	0	0	0	0	0	0	0	0	0	0	0	0	0
BnaC04G0274400ZS	4.8	3.06	0.93	1.08	1.16	0.81	0.44	0.33	1.89	2.61	4.7	2.55	0.4	0.49	0.54	0.13	5.32	2.23	2.65	2.42	1.52	0.62	0.15
BnaA07G0213500ZS	16.47	13.55	7.46	6.87	7.19	8	7.45	5.9	7.77	10.03	21.37	10.55	3.54	3.02	3.71	0.2	15.74	7.46	7.89	8.78	7.09	5.2	3.02
BnaA09G0554400ZS	0	0	0	0	0	0	0	0	0	0	0	0	0	0	0	0	2.63	0	0	0	0	0	0
BnaC08G0401200ZS	0	0	0	0	0	0	0	0	0	0	0	0	0	0	0	0	0.08	0	0	0	0	0	0
BnaC06G0228500ZS	0	0	0	0	0	0	0	0	0	0	0	0.12	0	0	0	0	2.65	0	0	0	0	0	0
BnaC06G0228600ZS	0	0	0	0	0	0	0	0	0	0	0	0	0	0	0	0	1.12	0	0	0	0	0	0
BnaA04G0011400ZS	0	0	0	0	0	0	0.02	0.02	0	0	0	19.89	0.54	0.25	0.11	5.31	0	0	0	0	0.03	0	0
BnaA09G0554900ZS	0	0	0	0	0	0	0	0	0	0	0	13.01	0.17	0.12	0.05	2.03	0	0	0	0	0	0	0.02
BnaC04G0270100ZS	0.54	0.7	0.78	0.56	0.91	0.89	0.7	1.33	0.66	0.25	0.28	19.83	2.22	2.62	1.73	4.77	0.17	0.32	1.52	0.86	0.55	0.59	3.2
BnaC08G0401700ZS	0	0	0.03	0.03	0	0	0	0	0.03	0	0	9.48	0	0	0.11	0.55	0	0	0	0.04	0	0	0.04
BnaC06G0228800ZS	0	0	0	0	0	0	0	0	0	0.05	8.36	0	0	0	0	0	0.05	0	0	0.1	0	0	0
BnaA04G0011300ZS	0	0	0	0	0	0	0	0.05	0.14	0.06	0.23	0	0	0.02	0	0	0.21	0.04	0.04	0.02	0	0	0
BnaA07G0214900ZS	0.08	0.2	0.13	0.03	0.02	0.08	0.11	0.27	0.1	0.06	1.45	0.14	0.03	0	0	0	1.24	0.35	0	0.05	0	0	0
BnaA09G0555100ZS	0.03	0.05	0	0.14	0	0.03	0	0	0.5	0.94	8.88	1.01	0	0	0	0	8.41	13.14	8.29	2.41	0.02	0	0
BnaC08G0401900ZS	1.14	1.97	1.28	0.85	1	1	0.48	0.33	1.7	3.1	15.57	2.79	1.13	0.33	0.26	0	10.4	7.71	8.79	6.24	0.58	0	0.16
BnaC06G0229100ZS	0.51	0.07	0.04	0	0	0.02	0.02	0.02	0.13	0.11	1.01	0.2	0	0.04	0	0.02	1.27	0.1	0.08	0.05	0.01	0.07	0.06
BnaA09G0558300ZS	5.31	1.95	1.28	1.2	1.65	1.85	2.15	3.7	0.8	0.86	1.35	0.74	2.65	1.85	1.93	0.03	1.65	4.06	2.75	3.64	4.69	3.34	0.66
BnaC08G0405700ZS	3.29	0.87	0.5	0.41	0.45	0.28	0.73	0.72	0.3	0.55	1.91	2.4	4.42	3.44	2.46	1.16	4.48	0.79	2.29	1.73	1.47	1.98	1.01
BnaA07G0217400ZS	16.18	15.21	11.59	11.47	12.73	14.6	14.61	14.86	6.45	7.6	9.21	8.52	36.58	41.23	37.07	6.06	10.77	6.62	7.96	11.86	9.9	12.43	11.95
BnaC06G0231900ZS	18.14	18.37	15.64	14.91	15.52	20.54	18.75	18.81	6.17	9.37	9.22	10.61	34.84	37.53	40.73	10.47	11.34	10.63	13.65	13.64	11.8	11	13.3
BnaA05G0013300ZS	18.69	10.27	5.32	5.24	5.91	8.22	8.45	15.65	9.22	12.93	27.67	8.48	13.14	23.11	10.69	0.89	18.21	20.99	20.33	14.49	21.59	25.59	48.87
BnaC09G0104400ZS	5.36	4.45	1.57	2.13	1.3	2.23	1.96	2.57	1.61	1.91	2.74	2.71	3.77	5.89	3.62	0.58	3	1.8	1.98	3.35	5.94	3.91	4.72
BnaC04G0265600ZS	11.58	9.92	1.5	1.73	2.09	2.76	2.34	2.02	0.64	0.34	0.11	0.13	0.11	0.63	0.48	0	0.41	0.28	0.28	2.08	1.85	3.27	0.3
BnaA09G0560100ZS	4.65	7.83	3.46	3.7	3.32	6.33	3.93	3.6	14.78	0.81	0.5	1.39	2.78	1.27	6.71	52.09	22.05	49.39	36.25	106.24	128.24	29.14	3.08
BnaC04G0263600ZS	0.77	3.44	0	0	0	0.08	0.1	0	0.08	0.43	0.54	0.05	0.75	0.06	0.48	0	0.86	0.04	0	0.09	0	0	0.41
BnaA07G0218900ZS	0.16	1.43	0.2	0.11	0.05	0.11	0	0	0.15	0.16	0.07	0	0	0	0	0	0.16	0.17	0.41	0.21	0.34	0	0
BnaC08G0411000ZS	0.26	1.39	0	0	0	0	0	0	0.13	0.49	0.58	0.11	0	0	0	0	0.72	1.57	5.55	2.59	9.13	0.29	0
BnaC06G0234100ZS	0.4	5.08	0.34	0.29	0.22	0.39	0.27	0	0.57	1.19	1.13	0.13	0	0.03	0	0	3.96	0.96	4.46	3.98	3.76	0.08	0
BnaA04G0006200ZS	11.82	10.72	1.09	1.4	1.04	1	0.47	0.17	2.2	4.74	19.93	8.69	0.5	0.61	0.62	0.16	17.75	4.63	3.94	5.41	4.88	0.11	0.23
BnaC04G0262600ZS	16.42	14.28	2.97	2.77	2.88	3.36	2.14	1.76	4.98	6.82	22.48	12.42	1.13	0.84	1.24	0.16	20.28	10.37	10.13	11.98	7.88	3.44	1.6
BnaA07G0220000ZS	0.04	0	0.05	0	0	0	0	0.02	0	0	0.05	0	0.02	0	0	0	0	0	0.02	0	0	0	0.02
BnaA09G0563300ZS	2.8	3.25	0	0.01	0.01	0.02	0	0.01	0.02	0.07	0.15	0.08	0	0	0	0	0.07	0.05	0.03	0	0.22	0	0
BnaC08G0412200ZS	5.01	3.45	0	0	0	0	0	0	0	0.25	0.16	0.48	0.04	0.01	0	0	0.61	0	0.02	0.01	0	0	0
BnaA09G0566700ZS	10.61	8.03	4.8	5.55	6.13	6.98	5.97	7.16	6.09	7.04	11.01	6.15	4.76	5.94	5.7	3.81	11.7	11.45	6.64	9.15	12.72	11.48	12.01
BnaC08G0416100ZS	7.21	7.3	7.92	8.59	9.37	9.55	10.12	10.95	8.6	6.92	19.28	10.86	6.23	7.58	5.1	7.32	17.77	9.59	7.93	9.69	10.39	9.97	13.82
BnaA04G0000500ZS	49.71	96.8	313.44	318.38	285.99	249.86	254.75	246.56	213.18	203.71	137.19	101.82	50.8	46.5	31.25	2.71	178.65	181.65	211.99	188.24	121.48	83.68	33.25
BnaC04G0254500ZS	100.07	125.74	324.55	332.66	323.7	291.46	285.7	246.72	294.04	310.82	158.31	115.95	56.63	69.86	39.77	4.03	228.95	207.81	243.67	215.88	147.19	83.54	49.77
BnaA04G0000300ZS	1.26	3.33	0.73	0.51	0.5	0.44	0.54	0.41	2.2	1.72	5.07	2.87	0.83	0.39	0.28	2.9	1.6	0.6	0.65	1.18	0.58	0.35	0.38
BnaC04G0254300ZS	0.48	1.31	0.28	0.16	0.18	0.17	0.17	0.12	0.47	0.35	1.59	0.78	0.2	0.03	0.25	0.75	0.79	0.31	0.12	0.23	0.17	0.07	0.23
BnaC03G0337800ZS	0.02	0	0	0.01	0	0	0	0	0	0.03	0	0	0	0	0	0	0	0	0	0	0.02	0	0
BnaA03G0280800ZS	0.05	0	0	0	0.03	0	0.04	0	0	0	0.48	1.6	0	0	0.08	0.04	13.6	3.87	5.58	14.22	19.35	17.64	30.22
BnaC03G0337700ZS	0	0	0	0	0	0	0	0.04	0	0	0.12	1.95	0.04	0	0.04	0	11.16	3.43	5.78	16.85	14.01	8.2	7.14
BnaA02G0248100ZS	1.96	1.03	0.23	0.03	0	0.14	0.02	0	0	0.27	1.86	0.09	0	0	0.03	0	0.53	0.17	0.27	0.08	0	0	0
BnaA09G0002200ZS	1.25	1.31	0	0.06	0	0.07	0	0	0	0	1.45	0	2.55	3.9	6.01	0	0.12	0	0	0	0.2	0.03	0
BnaC02G0332100ZS	1.78	0.83	0.05	0.03	0.18	0.03	0	0	0.03	0.07	2.68	0.16	0	0	0	0	0.23	0.09	0.15	0.06	0	0	0
BnaA09G0004100ZS	6.66	6.51	4.13	4.37	4.58	5.77	6.17	6.47	4.34	4.67	4.9	4.2	5.48	7	5.48	2.35	4.44	4.04	4.29	5.62	3.97	6.43	6.21
BnaC03G0337100ZS	4.57	4.35	1.99	1.99	2.2	3.07	3.22	3.73	3.45	3.88	3.71	2.79	4.21	5.08	4.93	0.6	2.95	2.31	2.05	3.5	2.55	5.46	5.63
BnaA03G0280100ZS	5.77	5.61	3.2	2.94	3.18	3.84	4.41	4.72	3.85	3.76	3.62	3.18	4.56	6.16	5.06	0.81	3.74	2.28	2.57	3.69	2.59	5.39	6.16
BnaA10G0083600ZS	10.86	9.49	6.37	6.07	6.3	8.37	8.12	8.35	2.56	2.57	6.04	5.42	9.27	8.89	14.92	1.04	4.77	2.63	6.66	10.27	6.61	6.26	7.2
BnaC09G0329300ZS	6.9	9.95	4.05	4.43	4.85	6.42	5.91	7.02	1.63	3.12	5.68	5.11	12.96	15.13	19.45	2.42	3.99	1.65	3.51	4.89	4.88	4.27	7.25
BnaA02G0250600ZS	0	0.08	0.36	1.08	0.17	0.08	0	0	1.93	4.33	1.19	1.08	1.18	0.16	0.08	0.54	0.88	0.54	0.39	0.17	0.07	0	1.12
BnaA03G0277000ZS	0.86	0.53	1.14	0.6	0.51	0.96	1.12	1.93	0	0	9.26	7.92	3.87	16.13	4.34	0.15	10.73	9.8	13.71	11.04	7.82	0.48	0.95
BnaA09G0006000ZS	0.03	0	0	0	0	0.02	0.08	0.52	0.3	0.09	0.05	0.03	0	4.98	0.47	0	0.19	0.33	0.54	1.19	2.12	1.49	0.05
BnaC02G0335900ZS	0	0.09	0.25	0.21	0.18	0	0	0	2.91	0.93	8.04	24.64	2.6	0.6	1.43	91.06	0.36	0.07	0.23	0	0	0	2.47
BnaC03G0334000ZS	0	0.96	0	0	0	0	0	0	0	0.2	12.56	10.11	0.22	3.5	1.3	0.24	1.99	0.89	0.97	1.16	1.49	0	0.52
BnaA02G0250200ZS	3.42	3.73	0.17	0.34	0.34	0.41	0.18	0.08	0.04	0.35	0.09	0.18	0	0.03	0.05	0	0.42	0.32	0.28	0.92	0.79	0	0
BnaA03G0277400ZS	4.06	3.15	1.07	1.5	1.32	2.26	3.34	6.72	1.32	0.92	0.63	0.21	0.52	0.27	0.62	0	0.61	0.54	1.73	3.35	4.02	10.9	5.06
BnaC02G0335100ZS	2.62	1.11	0.13	0.22	0.01	0.2	0.03	0.1	0.04	0.2	0.11	0.31	0	0.04	0.03	0	0.18	0.08	0.16	0.54	0.72	0.24	0
BnaC03G0334400ZS	4.09	3.44	0.83	0.93	1.33	1.57	2.94	3.74	1.68	2.91	0.43	0.18	1.15	1.16	0.52	0	1.86	4.55	4.96	7.56	16.32	16.7	6.58
BnaA01G0267300ZS	0	0	0.02	0	0	0	0	0	0	0	0	0	0	0	0	0	0	0	0	0	0	0	0
BnaC01G0327200ZS	0	0	0	0	0	0	0.03	0	0	0	0.05	0	0	0	0	0	0	0	0	0	0	0	0
BnaA09G0020200ZS	11.78	6.25	3.22	2.93	2.99	3.77	3.71	6.7	8.96	7.13	18.41	5.03	0.18	0.11	0.22	0.11	12.1	6.96	7.84	7.02	7.43	7.15	9.3
BnaA03G0275100ZS	1.38	0.3	0.05	0.13	0.32	0.04	0.23	0.11	0.55	2.01	2.04	15.8	6.23	2.01	1.97	53.99	2.98	2.45	0.77	0.64	0.89	0	0.03
BnaC03G0331500ZS	1.57	0.83	0.31	0.02	0.02	0	0	0.17	1.04	1.64	1.06	4.11	1.05	0.51	0.62	10.97	1.59	0.66	1.02	0.95	0.58	0	0
BnaA09G0021400ZS	16.31	12.73	8.31	8.32	8.64	10.08	9.12	12.49	6.23	8.88	16.14	13.45	0.79	0.37	2	0.89	16.85	8.67	11.01	9.79	9	12.7	9.91
BnaC09G0004800ZS	11.89	8.2	7.13	7.08	7.54	8.24	8.21	10.84	6.29	8.15	16.39	12.07	16.1	15.94	17.09	1.38	13.5	6.26	9.4	7	6.68	9.95	8.74
BnaA09G0022500ZS	10.61	8.19	5.43	6.71	6.06	7.46	7.69	10.13	5.9	4.83	10.87	5.39	0.9	0.85	2.03	1.09	9.41	4.68	5.31	6.64	7.01	10.36	13.23
BnaC09G0006700ZS	10.22	8.1	6.98	7.29	7.56	9.78	10.65	12.1	4.75	4.41	8.56	5.24	17.35	21.26	21.31	2.79	8.72	5.81	6.24	8.94	8.59	14.64	17.91
BnaA09G0024200ZS	0.83	0.6	0.47	0.41	0.58	0.81	1.55	3.74	0.54	1.06	0.53	3.84	55.49	76.33	69.47	5.74	0.13	0.49	0.71	2.18	4.29	3.15	9.76
BnaA02G0255500ZS	9.28	7.75	4.08	4.54	4.48	4.59	5.13	5.8	3.29	3.2	9.5	9.23	5.74	7.28	5.85	10.2	8.45	4.03	5.38	4.66	3.14	3.63	6.74
BnaC02G0344700ZS	8.32	6.76	4.17	3.62	4.63	5.11	5.27	4.96	2.91	3.27	8.53	7.75	4.3	5.63	4.01	10.87	6.79	3.35	3.73	4.56	2.89	3.59	5.61
BnaA02G0255700ZS	0.27	2.19	0.32	0.42	0.43	0.51	0.91	21.38	0.03	0.18	0.19	0.65	1.35	2.53	12	0.08	9.22	11.56	39.76	14.71	19.71	26.99	13.68
BnaC09G0011600ZS	26.26	12.15	13.3	11.58	13.03	17.68	18.49	18.66	17.16	14.94	10.11	7.36	14.71	11.74	11.5	0.23	13.48	10.62	14.68	8.5	5.27	5.51	1.44
BnaA09G0027300ZS	0	0	0.14	0.2	0.21	0.19	0.29	0.26	0	0	0.01	42.09	2.61	1.52	0.77	237.2	0.11	0	0	0	0.02	0.06	0.08
BnaC09G0012100ZS	0.04	0.03	0.14	0.23	0.23	0.2	0.3	0.34	0	0	0.02	38.89	31.35	11.04	6.61	240.04	0.73	0	0.03	0	0	0.06	0
BnaA09G0029000ZS	12.19	12.38	24.74	23.21	25.42	27.06	30.22	39.91	20.63	14.58	13.56	76.39	143.82	180.39	173.8	8.35	10.34	7.15	11.17	7.79	22.69	70.37	62.64
BnaA03G0267200ZS	83.49	14.04	6.95	7.41	6.78	2.67	0.37	0.84	28.57	48.26	38.9	13.75	1.01	0.05	0.53	0	54.04	20.76	12.65	2.29	0.26	0	0.05
BnaA09G0031300ZS	140.33	68.79	11.97	10.35	11.92	11.83	2.03	2.99	42.61	75.32	150.47	61.56	1.14	1.44	2	0	169.28	262.59	143.76	34.52	5.6	0.11	0.02
BnaC03G0320000ZS	59.68	16.89	3.49	3.81	4.6	2.83	0.42	0.55	15.84	28.62	37.03	16.3	0.15	0.18	0.09	0	28.84	20.88	15.13	4.72	0.52	0	0
BnaC09G0019300ZS	55.86	41.88	22.56	21.57	22.19	21.33	5.71	5.97	67.76	69.3	161.03	39.3	0.1	0.41	0.35	0	180.98	218.02	126.87	10.89	3.28	0.03	0.05
BnaA08G0141100ZS	0.08	0.31	0.35	0.34	0.31	0.38	0.68	0.64	0.09	0.09	0.63	1.49	0.15	0.04	0.05	3.16	0.23	0.1	0.06	0.02	0.03	0.31	0.26
BnaC03G0754100ZS	0.04	0.19	0.13	0.1	0.06	0.11	0.14	0.21	0.04	0.03	0.35	0.85	0.19	0.02	0.05	2.27	0.02	0.01	0.01	0.05	0.01	0.05	0.01
BnaA09G0235500ZS	6.36	11.84	54.07	54.32	55.93	59.28	60.26	42.02	42.03	35.63	5.85	3.65	8.37	9.03	4.92	4.93	9.4	8.93	9.59	8.92	6.21	14.05	4.78
BnaC09G0276500ZS	6.25	9.73	37.43	38.22	37.28	37.45	39.81	27.6	30.14	22.59	3.56	3.01	10.45	14.41	8.29	2.1	7.01	7.49	9.16	9.58	6.11	16.61	4.78
BnaA09G0235000ZS	12.49	10.51	7.62	8.14	8.15	9.89	10.44	10.76	7.13	7.48	11.07	8.25	6.32	6.81	5.73	2.15	9.71	6.22	7.56	9.78	8.3	9.45	10.01
BnaC09G0276100ZS	10.92	8.65	8.48	8.89	9.4	9.98	10.03	9.23	9.2	9.95	9.76	6.71	12.82	14.51	10.61	1.93	10.5	6.05	6.02	9.52	8.55	9.06	11.72
BnaA03G0263700ZS	1.76	3.59	12.62	12.32	13.9	15.69	15	14.28	10.94	14.1	21.67	10.72	4.28	7.13	2.8	0.1	14.44	10.84	12.03	7.8	4.58	1.82	1.43
BnaC03G0315100ZS	0.85	1.79	10.44	9.82	11.05	13.76	14.62	12.57	11.82	15.38	18.61	11.24	7.61	12.36	4.73	0.16	13.97	10.44	11.82	10.54	4.99	1.83	1.08
BnaA03G0264000ZS	22.38	18.48	18.79	18.88	18.33	19.81	18.16	17.06	15.56	15.96	20.11	12.27	15.19	17.18	18.04	4.67	18.32	17	17.96	17.84	20.54	16.66	15.33
BnaC03G0315400ZS	31.73	22.54	15.79	14.28	15.09	18.55	17.72	17.68	13.51	15.96	23.9	13.35	17.58	22.43	21.65	5.34	23.54	15.93	15.75	20.54	23.26	21.53	24.15
BnaA09G0230600ZS	0.33	1.17	0.92	0.44	0.48	0.38	0.19	0.22	0.87	1.64	0.82	0.91	0.1	0.03	0.08	0.12	1.73	1.19	1.2	0.37	0.14	0	0.02
BnaC09G0270700ZS	0.55	0.6	0.64	0.46	0.29	0.38	0.22	0.14	0.89	1.16	0.55	0.63	0	0.03	0.11	0.07	1.58	0.88	0.85	0.49	0	0.02	0.02
BnaA03G0264500ZS	4.23	2.36	0.71	0.72	0.62	1.01	0.86	2.36	1.77	1.75	11.71	1.88	1.37	2.3	0.48	0.04	5.11	2.03	2.27	2.42	2.51	3.27	4.28
BnaC03G0316300ZS	4.6	2.37	0.66	0.75	0.81	0.7	0.98	2.08	1.42	1.74	13.5	1.86	1.64	3.61	0.64	0	5.05	2.83	2.43	1.88	2.99	4.03	4.69
BnaA09G0034900ZS	13	8.68	4.81	4.2	4.52	4.67	4.19	8.82	7.6	10.64	15.75	7.74	5.16	4.64	3.9	0.28	15.72	8.16	7.24	13.45	13.66	10	9.86
BnaC09G0020100ZS	12.36	7.23	3.63	3.71	3.61	3.66	3.72	6.24	3.89	7.37	17.68	6.32	4.02	6.63	2.62	0.08	14.62	6.77	4.95	11.63	14.42	10.38	8.79
BnaA03G0246900ZS	101.01	77.15	0.02	0.05	0.27	0.09	0.04	0.16	0	7.97	4.83	4.4	0.51	0.06	0.75	0.04	11.56	1.67	1.91	0.63	0.39	0.62	1.55
BnaC03G0292200ZS	84.77	73.25	0	0	0.19	0.16	0.03	0.05	0.07	8.65	2.2	1.77	0.08	0.23	0.71	0.03	7.34	1.23	1.03	0.29	0.1	0.24	0.26
BnaA03G0248500ZS	71.98	101.57	22.59	23.87	17.49	19.38	15.58	13.97	30.09	65.93	19.61	14.08	11.48	17.35	12.06	0.85	48.24	49.07	47.67	57.08	34.53	12.33	7.22
BnaC03G0294000ZS	116.56	134.51	42.45	38.68	37.65	35.38	31.86	33.16	77.25	111.21	49.22	50.49	38.57	27.17	40.54	0.39	102.21	82.02	77.6	83.94	83.23	37.86	17.29
BnaA03G0248800ZS	13.13	15.61	17.86	18.98	21.3	32.87	41.64	50.99	7.16	10.26	4.39	1.99	3.03	1.04	2.94	0.06	8.27	12.95	29.82	16.37	10.32	40.93	29.43
BnaC05G0326100ZS	20.73	18.04	23.97	27.1	33.93	41.68	48.59	112.86	6.35	1.32	2.36	1.3	2.76	0.33	0.46	0.39	2.67	4.61	13.69	17	20.35	89.39	7.75
BnaA03G0249000ZS	31.22	22.32	12.47	13.18	14.83	18.96	22.27	28.9	7.27	9.68	17.43	15.4	309.58	426.39	398.13	4.97	10.79	11.89	16.22	30.44	39.15	72.43	161.93
BnaC03G0295100ZS	34.72	24.69	16	16.98	17.48	23.36	25.14	25.86	15.1	16.47	15.11	10.83	155.38	183.37	200.06	1.28	14.12	12.09	16.23	24.6	28.32	29.96	21.52
BnaA09G0259800ZS	0	0	0	0	0	0	0	0	0	0	12.77	19.74	0.15	0	0.03	0	85.6	5.18	5.18	3.15	0.01	0	0.52
BnaC03G0300400ZS	0	0	0.02	0	0	0	0	0	0	0	0	0	0	0	0	0	0.64	0	0	0	0	0	0
BnaC09G0306400ZS	0	0	0	0	0	0	0	0	0	0	0.03	0	0	0	0	0	0	0	0	0	0	0	0
BnaA03G0253300ZS	15.46	10.42	26.9	26.23	25.11	21.99	22.36	31.46	51.67	43.03	10.14	31.45	51.46	55.47	54	13.46	14.1	25.99	27.64	11.74	30.94	55.46	58.91
BnaC03G0300700ZS	10.35	9.54	22.96	22.8	19.46	20	24.5	40	60.39	24.84	9.95	17.99	47	47.19	51.44	8.62	8.52	23.85	27.44	8.09	26.87	49.19	52.6
BnaC09G0305500ZS	1.61	3.21	1.66	2.45	1.4	1.31	3.14	3	2.25	2.98	1.27	1.97	4.13	1.63	2.5	1.35	0.46	7.11	8.68	4.05	18.32	24.6	22.01
BnaA09G0246900ZS	0	0.39	0.34	0.41	0.49	0.79	1.04	1.32	0.12	0.01	0.11	1.31	0.07	0.03	0.04	0.52	0.01	0.01	0.01	0.1	0	0.1	0.01
BnaC09G0290800ZS	0.3	0.58	0.17	0.28	0.25	0.52	0.91	1.21	0	0.01	1.08	1.54	0.08	0.02	0.16	0.66	0.81	0.02	0.15	0.06	0.06	0.02	0.02
BnaA02G0265100ZS	8.95	8.58	2.81	2.08	2.72	2.93	2.51	2.99	2.17	3.84	142.22	14.44	6.16	6.76	8.59	0.51	12.79	3.75	4.1	3.02	2.58	1.05	1.82
BnaA09G0245900ZS	10.15	6.65	1.48	1.29	1.46	1.11	1.02	1.37	2.85	6.24	157.66	17.78	6.73	3.12	5.48	10.14	15.53	4.67	4.52	3.06	2.98	5.79	7.99
BnaC09G0289700ZS	6.94	5.72	2.02	1.65	1.7	1.59	0.98	1.55	3.03	9.18	112.6	12.28	1.78	1.49	2.5	3.16	18.66	7.65	8.44	2.81	1.86	0.53	0.79
BnaC02G0360400ZS	10.28	10.61	6.04	5.49	6.98	6.65	5.38	8.74	8.05	11.77	65.99	15.07	11.38	14.35	12.6	1.33	19.63	9.26	10.63	8.41	9.46	10.71	10.49
BnaC06G0288900ZS	0	0	0	0	0	0	0	0	0	0	0	0	0	0	0	0	0.27	0	0	0	0	0	0
BnaA09G0522500ZS	0	0	0	0	0	0	0	0	0	0	0	0	0	0	0	0	0.1	0	0	0	0	0	0
BnaC08G0366100ZS	0	0	0	0	0	0	0	0	0.14	0.23	0	0	0	0	0	0.1	0.33	0	0	0	0	0	0
BnaC08G0069700ZS	0	0	0.13	0	0	0	0	0	0	0	0	0	0	0	0	0	0	0	0	0	0	0	0
BnaA08G0053000ZS	2.75	2.28	1.05	1.09	1.21	1.54	1.68	2.51	1.98	2.15	3.41	1.49	0.9	1.89	0.55	0.41	2.72	2.06	1.93	2.24	1.79	3.09	3.97
BnaC04G0357300ZS	662.99	955.35	58.92	60.36	82.97	69.79	61.48	156.28	145.45	120.5	202.46	390.77	124.56	52.07	82.94	5.97	211.42	114.03	244.12	149.16	342.82	88.15	169.39
BnaA08G0051900ZS	727.18	737.28	150.39	156.93	155.31	162.85	145.94	225.42	187.72	132.19	259.7	391.38	70.82	42.48	71.58	7.37	344.14	137.19	229.12	358.55	449.45	169.02	94.69
BnaC06G0066900ZS	0	0	0	0	0	0	0	0	0	0	0	0	0	0	0	0	0	0	0	0	0	0	0
BnaC08G0068100ZS	643.12	788.24	131.9	133.18	129.37	137.73	124.72	187.44	195.87	140.14	225.66	341.19	92.72	53.44	86.51	10.24	276.47	101.44	242.47	267.06	411.14	123.84	135.65
BnaA03G0166800ZS	0.32	0.43	0.9	1.05	0.84	1.03	0.98	0.43	0.59	0.86	0.42	0.14	0.02	0.1	0.13	0.08	0.68	0.55	0.38	0.7	0.72	0.68	0.49
BnaC03G0192900ZS	0.65	0.26	0.1	0.07	0.35	0.29	0.21	0.27	0.47	0.71	0.74	0.36	0.16	0.35	0.16	0	1.12	0.54	0.64	0.84	0.7	0.89	0.46
BnaA01G0201200ZS	57.79	54.63	83.69	87.31	95.45	91.71	95.63	108.17	56.67	46.13	25.47	28.76	116.96	106.04	145.03	7.36	60.63	57.31	78.3	105.98	95.22	101.21	96.52
BnaA08G0091500ZS	78.94	116.15	49.06	49.09	48.86	40.77	35.44	43.05	74.62	82.21	136	50.23	58.29	25.41	38.47	0.34	117.34	66.21	97.63	80.33	55.63	53.91	35.34
BnaC08G0130400ZS	56.35	82.37	42.89	44.67	45.13	40.67	36.87	47.67	47.08	65.14	93.62	48.1	42.08	17.51	23.25	0.35	85.5	41.51	71.89	58.54	35.97	44.45	33.11
BnaA03G0432300ZS	0	0.08	0.12	0.04	0	0	0.04	0.17	0	0	0.36	0.52	0.13	0.06	0.25	0	0.09	0.2	0.1	0.04	0	0	0
BnaC07G0407000ZS	0	0.05	0	0	0	0	0	0	0	0	0	0	0	0	0	0	0	0	0.1	0	0.06	0	0.07
BnaA01G0189100ZS	12.1	7.77	5.06	5.52	5.54	6.02	6.68	7.34	2.84	3.72	7.58	6.45	7.63	9.75	6.83	3.19	7.37	6.24	5.26	8.57	7.76	10.31	9.54
BnaC01G0239900ZS	10.94	8.34	5.61	6.16	5.55	7.04	7	7.3	2.71	3.7	7.38	6.31	8.11	10.68	7.36	2.95	7.06	5.16	5.02	7.73	7.09	8.71	10.36
BnaA01G0183500ZS	1.78	1.08	0.61	0.75	0.64	0.48	0.45	0.54	1.3	0.9	4.2	0.66	0.37	1.38	0.11	0.04	2.14	1.25	0.94	1.07	1.28	0.17	0.54
BnaC01G0234200ZS	2.03	1.31	0.68	0.61	0.7	0.44	0.41	0.6	1.41	0.99	4.76	0.9	0.14	1.1	0.13	0.05	2.17	1.29	1.38	1.16	1.16	0.49	0.2
BnaC04G0337500ZS	0.02	0.01	0	0	0	0	0	0	0	0	0	0	0	0	0	0	0	0	0	0	0	0	0
BnaC09G0366500ZS	0.07	0.19	0.16	0.03	0.03	0.08	0.2	0.29	0.02	0	0.02	0.01	0.04	0	0	0.01	0.06	0.01	0.04	0.05	0.12	0.09	0.04
BnaC02G0201500ZS	0	0	0.03	0.03	0	0	0.01	0.02	0	0.01	0.09	0.28	0.07	0	0	0.72	0.03	0	0.02	0	0	0.01	0.01
BnaC08G0144600ZS	0	1.86	123.86	125.43	164.32	240.72	184.09	21.09	10.28	0.11	3.24	25.56	244.04	364.46	37.17	0.75	3.64	3	4.65	2.2	2.13	0.11	0.08
BnaC08G0146200ZS	4.8	5.03	4.32	4.34	3.93	4.05	3.82	3.66	11.54	9.58	12.1	7.42	5.86	6.31	6.64	1.38	10.53	3.42	5.19	5.45	4.43	3.1	3.43
BnaA01G0181300ZS	3.77	4.05	0.33	0.36	0.28	0.16	0.08	0	1.15	1.51	6.88	1.65	0.06	0.09	0.29	0.01	6.94	0.61	0.3	0.17	0.02	0	0
BnaC01G0231500ZS	2.12	2.21	0.23	0.23	0.07	0.04	0.03	0.03	0.56	1.15	4.79	1.21	0.04	0.1	0.18	0	5.19	0.51	0.2	0.12	0.02	0	0
BnaA01G0180500ZS	13.37	9.15	5.28	5.46	5.58	5.91	6.06	11.28	5.54	7.24	20.2	11.36	6.63	7	7.35	3.02	10.75	7.85	6.63	8.64	9.47	9.99	18.79
BnaC01G0230800ZS	12.39	8.23	4.19	4.63	4.52	6.14	5.42	8.08	4.26	6.01	17.29	8.66	3.84	4.35	3.63	3.23	10.23	5.69	5.98	10.2	9	8.25	13.12
BnaA01G0178400ZS	3.21	4.5	13.03	12.11	12.34	7.67	7.93	7.03	15.29	11.18	8.09	5.18	5.83	5.32	2.63	0.1	12.09	8.53	10.94	12.2	8.25	6.52	3.27
BnaA08G0104000ZS	4.22	4.54	12.24	12.8	12.45	7.36	7.31	6.77	16.31	12.9	9.48	7.65	4.44	3.47	1.57	0.3	16.13	11.22	13.41	11.52	7.53	7.18	2.52
BnaC01G0228700ZS	1.17	0.32	0.09	0.19	0.17	0.16	0.18	0.17	0.7	0.53	1.12	0.38	0.1	0.19	0.04	0	1.42	0.55	0.64	0.95	0.48	0.23	0.22
BnaC08G0149200ZS	4.99	7.23	19.33	18.36	18.43	13.09	12.16	11.17	22.55	20.75	14.42	11.93	7.65	6.11	3.25	0.43	22.48	14.37	18.35	17.4	11.71	10.48	5.52
BnaC08G0150000ZS	4.49	5.09	3.67	3.79	3.8	5.75	5.91	6.72	2.94	6.95	6.73	4.2	4.7	6.3	5.49	1.76	6.02	3.93	5.08	4.96	3.83	6.39	6.76
BnaA08G0105600ZS	27.51	26.37	20.9	19.64	18.53	23.84	21.76	28.13	29.46	23.04	30.64	31.83	75.49	78.98	73.44	11.76	20.01	25.37	32.86	19.35	26.51	36.46	53.54
BnaC08G0153400ZS	23.78	20.71	17.32	16.76	15.41	18.71	18.39	25.63	14.3	18.98	27.04	39.89	85.42	91.36	84.76	23.67	16.61	27.26	32.67	17.82	22.62	31.27	66.67
BnaA01G0090900ZS	11.43	10.87	8.92	8.85	9.49	11.28	10.27	8.19	4.24	3.51	5.35	5.62	4.29	5.55	4.74	3.3	6.79	4	4.21	5	5.04	4.64	4.19
BnaC01G0110900ZS	20.89	23.31	26.25	25.21	26.28	30.32	28.39	23.51	15.7	8.53	8.4	8.49	16.93	18.69	14.34	4.81	9.54	7.41	6.38	8.29	8.3	13.02	11.27
BnaA03G0445900ZS	24.5	1.04	0.88	0.72	1.35	2.27	5.34	8.93	0.04	0.09	0.49	0.19	1.63	0.78	3.45	0	0.28	0	0.22	0.55	1	4.7	16.43
BnaA01G0096000ZS	0.05	0.15	1.59	2	1.28	1.83	1.76	2.28	0.05	0.04	0.44	381.45	91.59	31.69	16.24	1677.21	1.72	0.54	0.02	0.27	0.31	0.76	0.99
BnaC01G0117300ZS	0.23	0.25	0.99	1.93	2.06	3.29	2.61	2.15	0.17	0.04	0.74	410.73	217.88	71.21	37.65	1852.8	1.51	0.39	0.62	0.28	0.47	1	0.54
BnaC01G0117400ZS	4.49	4.26	2.94	2.69	3.01	3.86	3.75	3.24	2.18	2.97	3.18	2.01	2.73	3.32	2.57	0.57	3.43	3.41	3	3.99	2.64	4.85	2.91
BnaA08G0111700ZS	0	0.04	0	0	0.02	0	0	0	0	0	0.01	0.1	0	0	0	0	0.02	0	0.03	0	0	0	0
BnaA03G0451500ZS	0	0	2.02	2.45	3.04	0.41	0.03	0.22	0.02	0	8.2	21.24	7.72	0	11.33	4.42	12.69	29.14	32.16	31.13	22.1	15.94	3.64
BnaC03G0708200ZS	0	0.04	0	0	0.05	0	0.01	0	0	0.02	11.53	6.33	0.54	0	18.39	2.89	14.41	28.91	18.41	20.1	13.61	8.13	6.21
BnaA01G0101000ZS	5.77	5.53	3.95	4.33	4.26	5.28	6.02	3.5	2.54	3.73	8.25	4.29	3.52	2.63	3	0.4	6.11	3.01	3.91	4.36	3.42	2.71	2.74
BnaC01G0123400ZS	5.28	4.51	3.61	3.7	4.1	4.69	5.14	4.1	2.75	3.61	7.59	4.46	2.35	1.45	1.29	1.5	5.68	2.6	3.54	5.05	3.38	1.79	1.55
BnaC07G0428200ZS	3.21	2.99	1.93	1.97	1.9	2.04	2.4	2.18	1.29	1.8	3.9	1.93	2.27	2	2.14	0.15	3.91	1.75	1.27	2.6	2.34	1.56	0.95
BnaA01G0107200ZS	10.32	7.89	0.04	0.08	0.06	0.04	0	0	0.28	0.29	152.17	1.21	0.02	0	0.02	0	13.6	1.65	1.46	1.78	1.81	0	0
BnaC01G0130700ZS	1.3	0.43	0.06	0.03	0.01	0.06	0.08	0.05	0.32	0.17	188.02	0.2	0.02	0.05	0	0	5.19	0	0.04	0	0	0.02	0
BnaA01G0107300ZS	1.37	1.05	0.45	0.55	0.56	0.74	0.59	0.75	0.45	0.64	1.23	0.54	0.26	0.36	0.34	0.03	1.22	0.28	0.42	0.73	0.37	0.55	0.43
BnaC01G0130800ZS	0.69	0.66	0.5	0.45	0.56	0.44	0.5	0.56	0.43	0.16	0.87	0.31	0.48	0.48	0.34	0	0.95	0.65	0.64	0.54	0.47	0.9	0.41
BnaA01G0107400ZS	2.7	2.19	1.06	1.05	1.06	1.54	1.62	2.63	2.07	2.81	3.78	1.87	1.26	1.56	0.96	0.12	3.57	1.21	1.65	2.5	1.84	3.05	2.37
BnaC01G0130900ZS	2.52	1.87	0.97	0.99	1.05	1.09	1.11	2.02	2.35	2.85	4.52	2.09	0.99	1.55	0.56	0.21	4.12	1.43	1.95	2.23	2.18	2.52	1.94
BnaA01G0107600ZS	0.57	0.39	0.01	0	0.01	0	0	0	0.02	0.31	1.64	0	0.01	0	0	0	0.04	0	0.01	0.02	0.06	0.04	0.03
BnaA03G0457400ZS	5.35	4.27	3.38	3.33	3.66	2.74	2.06	3.47	5.64	8.57	5.29	2.43	1.71	2.47	2.44	0.09	7.66	1.91	2.26	3.44	1.07	0.91	0.33
BnaC07G0433100ZS	7.37	8.48	3.25	3.6	3.17	2.82	2.27	1.88	4.27	6.29	4.56	3.72	3.68	6.22	8.94	0.14	5.97	1.33	2.06	2.83	0.72	0.82	0.68
BnaA07G0282700ZS	21.87	200.2	300.33	318.31	325.76	476.15	417.38	327.2	0	0.41	3.06	9.9	178.04	212.02	169.55	4.87	48.25	206.38	182.83	314.76	346.59	601.47	10.23
BnaA01G0109600ZS	13.68	11.63	6.11	6.97	6.66	8.54	8.15	8.28	5.89	6.87	15.71	9.26	6.83	9.78	7.92	1.96	13.05	9.18	11.55	11.71	9.12	18.38	15.88
BnaC01G0133300ZS	15.91	12.88	6.74	6.53	6.93	9.56	9.14	11.91	5.28	6.95	14.8	8.05	8.38	10.53	7.82	0.89	11.07	14.74	11.4	9.75	11.32	21.1	18.39
BnaA03G0458800ZS	0	0	0	0	0	0	0.03	0.11	0.05	0.07	0.2	0	0	0	0	0	0.37	0.05	0.27	0.16	0.19	0.33	0.06
BnaC07G0434700ZS	0.07	0.05	0	0	0.05	0	0	0	0	0	0.19	0	0	0	0	0.05	0.1	0	0.02	0.11	0.05	0.08	0.04
BnaA01G0111700ZS	3.3	3.01	1.5	1.41	1.42	1.4	1.41	1.43	1.31	1.68	9.64	2.85	0.7	0.88	1.44	0.28	7.98	2.12	2.48	2.04	1.43	1.12	1.03
BnaC01G0135300ZS	6.57	4.99	2.77	2.86	3.05	3.02	3.45	3.72	3.42	3.47	11.34	3.61	5.58	6.21	5.28	0.31	8.2	21.44	4.71	3.5	7.14	6.91	4.98
BnaA01G0114100ZS	3.83	4.4	5.77	6.38	6.25	6.52	6.63	7.47	12.11	8.79	6.52	2.07	2.87	2.41	1.93	0.04	13.85	6.08	7.21	7.87	5.36	4.03	1.14
BnaC01G0139100ZS	5.15	6.3	11.4	10.98	11.46	12.12	12.56	9.71	15.28	12.85	7.12	5.69	7.87	8.89	6.22	0.84	10.14	7.44	8.5	10.51	9.58	9.85	4.9
BnaA01G0115100ZS	0	0	0	0	0	0	0	0.06	0	0	0	0	0	0	0.03	0	0	0.03	0.03	0	0	0	0
BnaC01G0140300ZS	0	0	0	0	0.01	0.02	0.02	0	0	0	0	0.02	0.03	0	0	0.01	0.02	0	0	0	0.03	0	0
BnaC03G0722800ZS	0	0	0	0	0	0	0	0	0	0	0	0	0	0	0	0	0	0	0	0	0	0	0
BnaA08G0120600ZS	0	0	0.01	0	0.03	0.02	0.1	0	0.01	0.01	0	0	0	0	0	0	0	0	0	0	0	0	0
BnaC03G0721500ZS	0	0	0	0.04	0.03	0	0	0	0.01	0.03	4.01	0	0	0	0	0	0.2	0.12	0	0	0.02	0	0
BnaC03G0721400ZS	0	0	0	0	0	0	0	0	0	0	0	0	0	0	0	0	0	0	0	0	0	0	0
BnaC03G0721300ZS	0.3	0.31	0.22	0.33	0.37	0.3	0.3	0.32	0.9	0.76	0.28	0.21	0	0	0	0	0.49	0.19	0.42	0.14	0.38	0.35	0.09
BnaC03G0720500ZS	0	0	0	0	0.04	0.08	0.2	0.87	0.01	0	1.22	0	0.32	0.09	0.06	0.04	0.32	0.08	0.06	0.67	0.3	1.04	0.59
BnaC09G0410800ZS	4.94	7.4	6.09	5.32	6.14	6.23	6.48	6.76	10.64	7.52	2.85	2.79	4.71	5.55	3.61	0.15	8.59	2.84	4.87	5.66	4.32	3.06	1.39
BnaC01G0144200ZS	18.37	16.78	9.25	9.84	9.64	11.79	11.39	11.74	9.53	14.3	19.65	13.06	9.02	9.8	9.52	1.49	15.5	10.68	11.41	13.5	11.48	12.65	12.46
BnaA01G0119200ZS	19.26	16.24	13.88	13.94	15.52	16.97	15.97	24.66	11.2	13.5	28.53	12	9.51	7.89	6.35	4.31	20.63	15.05	12.19	13.74	17.39	22.15	12.88
BnaA08G0124100ZS	0	0.05	0	0	0	0	0	0	0	0	0	0	0	0	0	0	0	0	0	0	0	0	0.03
BnaC01G0145700ZS	32.56	20.72	14.24	13.23	15.13	17.61	19.23	27.21	9.53	12.87	45.36	17.79	14.82	14.26	9.67	2.41	23.95	14.53	15.46	13.73	15.47	20.17	16.27
BnaC03G0725900ZS	0.64	0.58	0.2	0.16	0.19	0.09	0	0.02	0.35	0.61	1.07	0.3	0	0	0	0.11	1.26	1.47	0.31	0.25	0.76	0.04	0
BnaA03G0463600ZS	19.77	18.32	9.26	8.74	7.77	12.72	14.76	17.46	0.94	3.08	9.63	3.61	88.09	87.88	80.45	4.55	3.31	3.84	6.14	8.77	12.67	13.32	25.05
BnaC07G0439500ZS	25.08	25.1	7.13	7.27	7.6	13.96	16.75	18.4	0.77	3.27	11.72	4.59	139.93	171.05	137.4	3.42	5.96	4.17	5.63	9.94	15.02	14.79	46.61
BnaA01G0121900ZS	8.25	7.6	5.19	5.96	5.72	6.28	5.51	6.48	8.8	11.75	13.13	6.17	4.64	4.9	5.08	1.38	14.47	8.34	7.59	10.46	10.96	7.22	6.89
BnaC01G0150500ZS	12.81	11.74	7.52	7.46	8.19	8.76	7.99	9.13	15.22	20.53	18.01	9.49	8.6	8.57	7.59	1.45	23.79	10.99	12.77	20.04	19.58	14.38	14.68
BnaA01G0125200ZS	0	0	0	0	0	0	0	0	0	0	0.56	0	0	0	0	0	0	0	0	0	0	0	0
BnaC01G0155500ZS	0	0.15	0.03	0	0	0	0	0	0.05	0	0.51	0	0	0	0	0	0.03	0	0	0.03	0.07	0	0
BnaA03G0471400ZS	4.1	5.15	13.36	12.55	13.55	16.17	16.57	20.71	19.19	9.91	4.57	4.18	2.89	5.56	1.05	0.02	7.14	5.97	8.6	8.93	5.27	7.31	6.37
BnaC03G0734600ZS	0	0.02	0	0.09	0.01	0.02	0.46	0.81	0	0	0	0	0.44	0.02	0.13	0	0	0	0	0	0.02	1.85	3.32
BnaA03G0472200ZS	1.41	1.34	0.49	0.4	0.38	0.07	0.36	0.03	1.77	0.8	0.81	2.65	0	0.05	0.08	0.14	2.02	0.18	0.3	0.22	0.03	0.02	0
BnaC01G0165000ZS	5.3	5.88	1.5	1.39	1.44	0.46	0.26	0	2.05	2.24	1.64	1.66	0	0.09	0.05	0.09	2.49	0.45	0.65	0.8	0.27	0.05	0
BnaC07G0449600ZS	0.79	0.75	0.39	0.42	0.32	0.17	0.16	0.05	1.68	1.65	0.64	1.57	0	0.08	0.02	0.3	0.5	0.37	0.52	0.71	0.18	0.09	0
BnaA03G0478100ZS	0.27	0.45	0.38	0.3	0.44	0.37	0.49	0.48	0.47	0.13	3.08	0.91	0.08	0.4	0.18	0	0.7	0.35	0.21	0.67	0.66	0.12	0.07
BnaC01G0176000ZS	0.36	0.16	0.22	0.27	0.19	0.25	0.16	0.37	0.46	0.19	1.86	1.24	0.03	0.04	0.15	0	2.38	0.02	0.05	0.15	0.34	0.2	0.23
BnaC07G0456400ZS	2.32	1.22	1.55	1.23	1.3	0.83	0.95	0.87	3.42	3.04	4.42	1.7	0.02	0.04	0.02	0.05	2.3	0.23	0.38	1	1.09	0.52	0.5
BnaA01G0137600ZS	0.28	0.13	0.1	0.13	0.03	0.17	0.27	0.1	0.1	0.03	0.97	0.99	0.01	0	0	0	3.01	0.11	0.12	2.1	0.8	0.25	0.19
BnaA01G0138200ZS	94.05	82.46	116.88	117.04	131.05	96.34	69.05	67.28	69.7	86.84	172.26	70.26	31.92	24.92	24.06	1.69	181.07	203.29	153.1	83.34	162.36	183.01	37.54
BnaA03G0478400ZS	2.56	1.06	0.34	0.38	0.28	0.26	0.16	0.12	0.74	0.68	1.54	0.51	0.05	0.03	0	0	1.72	11.85	2.46	0.85	4.77	1.64	0.29
BnaA08G0176500ZS	0.03	0.29	0.37	0.38	0.34	0.2	0.13	0.11	0.23	0.12	0.21	0.65	0.18	0	0.03	0	0.47	0.64	0.26	0.13	0.42	0.23	0.24
BnaC01G0176600ZS	96.42	73.87	98.82	97.23	102.03	78.8	55.8	46.15	56.49	79.59	191.71	65.65	32.69	26.61	25.56	1.81	176.72	158.41	137.62	77.28	157.64	209.47	42.78
BnaC07G0456700ZS	40.41	36.62	22.72	21.41	24.77	18.17	12.31	11.31	18.9	24.37	32.56	14.86	3.94	3.41	5.18	0.61	49.51	64.82	42.94	23.9	66.86	47.95	11.89
BnaA01G0138800ZS	0.48	0.49	0.21	0.43	0.28	0.31	0.1	0.04	0.47	0.3	0.11	0.17	0.02	0.02	0	0	0.19	0.25	0.34	0.08	0	0	0
BnaA03G0478900ZS	1.4	1.55	1.39	1.23	0.99	0.91	0.29	0.35	1.22	2.07	7.1	2.01	0.1	0.02	0	0.03	2.94	2	2.03	0.85	0.1	0.01	0
BnaC01G0177400ZS	1.93	2.24	0.49	0.55	0.38	0.76	0.19	0.07	0.63	0.89	0.57	0.64	0.1	0	0	0	2.86	0.94	1.25	0.78	0.51	0.03	0
BnaC07G0457300ZS	1.49	1.37	1.17	1.08	0.78	0.79	0.39	0.1	1.26	2.16	1.82	3.46	0.08	0.05	0.19	9.61	2.51	1.21	1.44	0.77	0.17	0	0
BnaA01G0139200ZS	14.13	12.56	7.07	8.14	8.46	9.42	9.52	9.5	5.71	6.7	16.3	8.81	7.77	9.83	6.59	1.05	13.47	8.36	9.14	8.94	9.35	10.95	10.54
BnaA03G0480800ZS	0.02	0.05	0.04	0.03	0.01	0.05	0.03	0.04	0.11	0.01	0.03	7.1	0.18	0.04	0.09	1.43	0.17	0	0	0.08	0.02	0.03	0.03
BnaA08G0175100ZS	0.01	0.21	0	0	0	0.03	0.01	0	0.05	0.01	0.05	10.24	0.38	0.17	0.04	6.61	0	0	0	0	0.01	0	0
BnaC01G0180800ZS	3.67	1.7	0.3	0.41	0.37	0.41	0.32	0.27	0.05	0.13	0.44	4.41	0.23	0.13	0.12	4.79	0.49	0.13	0.14	0.06	0.07	0.13	0.31
BnaC07G0459000ZS	0	0.01	0	0.01	0	0	0	0	0.02	0.01	0.09	7.53	0.37	0.14	0.08	5.79	0	0.06	0.01	0	0.03	0.02	0.02
BnaC08G0160300ZS	0	0.02	0	0.01	0	0.02	0	0	0	0	0	9.16	0.44	0.07	0.04	6.62	0	0	0	0	0	0	0
BnaA01G0142100ZS	2.74	1.74	1.75	2.31	2.41	1.63	1.53	0.95	3.56	4.34	12.6	4.12	0.73	0.27	0.43	0.08	7.83	3.28	4.58	3.66	2.48	1.49	0.2
BnaC01G0181100ZS	4.67	2.91	1.54	1.56	1.77	1.14	0.79	0.77	3.73	4.54	13.13	4.42	0.56	0.41	0.7	0	7.87	2.78	3.58	3.11	2.32	1.49	0.18
BnaA01G0144600ZS	7.37	5.43	4.22	4.03	4.27	5.24	5.92	6.64	2.35	2.14	5.75	3.24	1.42	1.51	1.13	1.37	5.57	3.17	2.99	4.03	3.45	5.84	6.88
BnaC01G0183600ZS	3.65	2.66	2.61	1.76	2.19	2.72	2.76	3.76	1.6	1.91	3.19	2.5	4.33	5.08	4.15	0.47	2.84	1.7	1.53	2.2	1.89	2.87	3.76
BnaA01G0145300ZS	0.58	0.47	2.22	2.86	2.26	1.18	0.86	0.29	4.84	2.43	2.27	3.36	1.28	0.11	1.65	0.17	20.93	18.5	19.67	46.83	22.29	1.51	0.5
BnaC01G0184500ZS	0.44	1.23	3.45	4.69	4.49	3.16	2.01	1.45	4.81	3.96	3.08	4.76	1.42	0.3	0.51	4.32	14.47	12.23	16.65	51.79	54.55	16.4	6.56
BnaA03G0483000ZS	0.06	0.24	0.08	0.05	0.14	0.19	0	0	0.05	0	0.41	15.13	0.1	0	0.08	86.61	1.14	0.05	0.06	0.01	0	0	0
BnaA08G0174000ZS	0	0.64	0.03	0.19	0.1	0.1	0	0.1	0.1	0	0.26	29.41	0.09	0.13	0.41	79.11	0	0	0	0	0	0	0
BnaC01G0184700ZS	0	0.32	0	0	0	0	0	0.97	0	0	1.51	68.57	3.69	0.25	3.52	239.62	0.45	0	0.05	0.03	0	0	0.68
BnaC07G0461000ZS	0.03	0.7	0	0	0	0	0	0	0.03	0	0	0.2	0	0	0	0.07	0.59	0	0	0	0	0	0
BnaC08G0164100ZS	0	0.09	0.05	0.07	0	0	0	0	0.05	0	0.22	30.7	0	0	0.02	79.57	0.1	0	0	0	0	0	0
BnaA08G0172500ZS	38.43	30.1	11.43	10.21	10.66	12.56	14.34	18.75	21.71	32.47	51.99	24.41	18.72	20.14	16.46	1.22	39.71	29.96	17.58	30.02	33.28	33.88	40.57
BnaC07G0465400ZS	16.02	2	0.37	0.45	0.41	0.82	1.36	2.56	0.14	0.05	1.04	1.13	6.09	5.64	3.53	0	7.01	2.2	7.54	22.72	16	5.47	1.82
BnaC08G0166300ZS	60.01	53.28	19.26	19.22	18.64	20.86	21.38	26.47	25.43	43	69.15	34.28	25.09	25.07	25.16	3.6	51.83	44.37	29.05	39.28	38.29	41.18	42.68
BnaA01G0150700ZS	0	0.03	0.79	1.11	0.84	0.65	0.87	0.46	0.32	0.18	0.02	0	0	0	0	0	0.08	0.26	0.47	0.38	0.08	0	0
BnaC01G0191300ZS	0	0.01	0.02	0.05	0.01	0.02	0.04	0.06	0.03	0.01	0.02	0	0	0	0	0	0	0	0	0	0	0.01	0
BnaA01G0151500ZS	2.13	0.43	3.81	2.97	2.73	1.59	1.42	1.44	10.2	1.99	7.18	12.39	3.39	10.22	11.4	0.45	5.15	1.48	5.18	1.76	0.84	1.26	0.55
BnaA03G0488100ZS	7.68	15.66	34.24	36.75	38.53	49.13	56.4	71.36	33.09	23.52	55.28	9.93	119.56	107.64	98.33	0.26	29.68	21.55	50.45	75.63	106.95	88.67	62.34
BnaC01G0192200ZS	8.16	1.2	8.12	7.47	6.33	3.58	3.5	6.25	18.86	4.42	42.57	71.14	85.97	137	151.81	2.26	15.78	2.53	20.43	2.04	0.97	3.99	2.66
BnaC07G0466600ZS	5.38	7.18	17.98	17.78	18.83	21.92	22.62	26.1	16.59	7.02	35.24	8.53	67.3	81.11	73.47	0.25	11.92	5.11	13.38	13.59	28.65	27.93	28.44
BnaC08G0166900ZS	2.68	0.72	7.09	7.13	10.7	28.22	53.05	112.43	12.09	5.82	1.25	1.09	15.63	0.83	1.22	0	0.1	0.7	6.59	1.24	3.73	56.65	21.74
BnaA01G0155000ZS	0	0	0	0	0	0	0	0	0	0	0	0	0	0	0	0	0	0	0	0	0	0	0
BnaC01G0196600ZS	0	0	0	0	0	0	0	0	0	0	0	0	0	0	0	0	0	0.04	0	0	0	0	0
BnaA03G0491800ZS	0.18	0.41	0.7	0.73	0.72	0.59	0.81	0.89	0.41	0.36	1.09	1.53	0.43	1.06	0.16	3.27	0.81	0.09	0.2	0.54	0.43	0.41	0.79
BnaC07G0470200ZS	1.12	0.94	1.1	0.63	0.66	0.9	1.04	1.05	0.7	0.74	1.34	3.46	1.17	1.33	0.63	10.51	1.37	0.46	0.24	1.23	0.99	0.68	1.12
BnaA01G0158600ZS	0	0.16	0.1	0.06	0.06	0.07	0.09	0.05	0.02	0.03	0.4	0.08	0	0	0	0.24	0.27	0	0.02	0	0.02	0.03	0.11
BnaC08G0169300ZS	0	0.26	0	0	0	0	0	0	0	0.09	0.12	0.23	0.07	0.2	0.15	0	4.53	0.02	0.23	0.06	0.08	0	0
BnaC01G0202500ZS	0	0	0	0	0	0	0	0	0.06	0.03	0.07	0.9	0.15	0.05	0.08	0.35	0	0.02	0	0	0	0.02	0
BnaA03G0492700ZS	0.06	0.1	0	0.05	0	0	0	0	0	0	0	0.05	0	0	0	0	0.03	0	0	0	0	0.34	0
BnaC07G0471300ZS	0.12	0	0	0	0	0.04	0.03	0.04	0	0	0	0.13	0	0	0	0.1	0.08	0	0	0	0.05	0.31	0.04
BnaA01G0161300ZS	4.41	1.99	5.08	5.85	6.17	6.29	5.86	4.56	3.78	4.74	6.95	4.68	13.39	20.97	21.67	1.9	2.94	3.24	3.02	8.57	7.91	6.21	16.72
BnaC01G0206200ZS	2.72	1.18	3.9	4.2	3.83	2.78	2.76	1.91	3.72	3.47	1.45	1.22	17.88	27.03	20.96	0.11	2.15	4.03	2.86	4.21	3.64	4.09	4.79
BnaA03G0494100ZS	11.19	8.99	4.33	4.54	4.64	4.49	4.64	5.39	7.9	8.69	12.74	9.59	5.39	6.01	4.49	3.09	13.26	5.2	7.99	8.03	7.87	4.96	5.42
BnaC01G0206400ZS	29.44	16.32	8.16	7.96	8.31	10.92	10.04	11.46	11.97	10.69	14.74	14.32	14.49	19.53	17.81	0.7	16.7	5.84	10	10.62	9.62	6.23	5.21
BnaC07G0473500ZS	9.64	7.99	5.07	4.97	4.05	4.61	5.48	7.76	6.3	7.11	11.96	7.35	7.59	8.02	7.41	3.52	9.79	6.83	8.36	9.22	9.73	8.99	10.38
BnaA01G0162600ZS	0	0	0	0	0	0	0	0	0	0	0.07	0	0	0	0	0	0	0	0	0	0	0.08	0
BnaC01G0209400ZS	0	0	0	0	0	0	0	0	0	0	0	0	0	0	0	0	0	0	0	0	0	0	0
BnaA03G0497300ZS	0.03	0	0	0	0	0	0	0.09	0	0	2.59	0.06	0	0	0.09	0.33	0.11	0	0	0.03	0.05	0.34	0.69
BnaC07G0475500ZS	0	0	0	0	0.02	0	0.02	0	0	0	7.32	0	0	0	0	0.03	0.3	0	0	0	0.1	0.03	0.03
BnaA01G0175200ZS	1.34	0.86	0.29	0.24	0.26	0.1	0.16	0.03	1.55	2.21	5.59	1.24	0.08	0.09	0	0.03	2.83	0.09	0.3	0.06	0.06	0	0
BnaA03G0503000ZS	0.12	0	0	0	0	0	0	0	1.88	1.24	2.79	1.27	0.07	0	0.03	2.8	0.3	0	0	0	0	0	0
BnaC01G0224600ZS	2.64	3.48	0.2	0.2	0.22	0.22	0.18	0.03	2.4	2.37	17.5	4.56	0.07	0.4	0.46	1.18	7	0.31	0.61	0.34	0.6	0.03	0
BnaC07G0481300ZS	2.8	0.11	0	0.05	0	0.11	0.03	0.03	6.64	5.85	2.84	1.76	0.08	0.07	0.02	1.27	1.9	0.09	0	0	0	0	0
BnaA01G0084700ZS	0.02	3.13	0.06	0.07	0.1	1.01	0	1.65	0	0.18	14.13	2.12	47.72	119.04	135.61	0.14	1	0.05	0.09	1.28	31.08	13.93	6.11
BnaA03G0505600ZS	7.03	5.16	0.15	0.13	0.09	2.14	0.05	0.98	0.03	0.25	5.25	2.98	74.89	163.24	150.65	0.02	0.93	0.2	0.12	0.22	29.29	1.37	0.29
BnaA06G0255400ZS	2.09	1.44	1.13	0.88	1.4	1.26	1.19	1.3	1.42	0.74	3	1.98	1.68	2.1	1.5	1.44	2.75	0.98	0.76	0.82	1.2	0.84	1.26
BnaA03G0509600ZS	0.83	0.46	0.14	0.18	0.26	0.16	0.19	0.43	0.43	0.32	2.03	0.96	0.04	0.12	0.03	0.01	2.67	0.52	0.56	0.82	0.95	0.51	0.51
BnaC07G0487800ZS	6.56	6.79	5.32	4.45	4.76	5.72	5.03	5.72	2.22	3.87	5.42	4.81	6.01	6.75	9.51	1.9	5.22	4.21	4.63	5.07	6.42	4.62	4.68
BnaA09G0425200ZS	0	0	0	0	0	0	0	0	0	0	0	0	0	0	0	0	0.17	0	0	0	0	0	0
BnaC03G0768400ZS	0	0	0	0	0	0	0	0	0	0	0	0.26	0	0	0	0	1.47	0	0	0	0	0.3	0.07
BnaC03G0697100ZS	0	0	0	0	0	0	0	0	0	0	0	0	0	0	0	0	0	0	0	0	0	0	0
BnaA08G0159600ZS	0	3.54	21.61	25.38	22.3	11.36	13.73	7.57	3.89	3.6	0.15	88.72	1.34	0.12	0.27	26.4	3.48	2.94	6.47	9.52	1.57	0.52	0.06
BnaC03G0779300ZS	0	0	0.09	0	0	0	0	0.03	0	0	0.03	87.15	0.15	0	0	18.67	0	0	0	0	0	0	0
BnaC01G0095700ZS	0.49	0.16	0	0	0	0	0	0	0	0.07	0	113.34	0.22	0.08	0.05	11.19	0.37	0.03	0	0	0	0	0
BnaA01G0078200ZS	9.72	9.87	5.23	5.35	6.13	7.44	7.67	7.46	4.16	4.53	5.14	4.75	14.24	15.19	15.64	4.08	5.03	3.95	5.3	6.97	5.3	8.35	7.67
BnaC01G0094700ZS	10.81	10.24	5.09	5.01	5.46	7.66	7.63	7.91	3.05	3.88	5.63	9.51	15.31	22.1	17.84	18.57	5.07	3.78	4.33	5.57	5.67	8.01	8.74
BnaA01G0077400ZS	0	0	0	0	0	0	0	0.11	0	0	0	9.06	0.08	0	0.04	19.7	0.04	0	0	0	0	0	0.03
BnaC01G0093600ZS	0	0	0	0	0	0	0	0	0	0	0	0	0.99	0.26	0.04	0.68	0	0	0	0	0	0	0
BnaA01G0076700ZS	9.82	9.38	7.47	7.63	6.89	6.86	8.77	10.04	12.29	10.64	9.99	9.44	9.08	8.01	5.22	0.89	10.88	9.35	9.05	11.13	17.67	19.13	25.95
BnaC01G0092400ZS	3.39	5.36	4.88	5.79	5.67	5.26	5.95	7.03	10.54	9.96	7.48	5.98	14.48	16.39	14.31	0.68	7.72	6.18	7.35	6.48	10.59	10.65	17.17
BnaA01G0073700ZS	2.63	2.27	0.9	1.05	1.03	0.97	0.83	0.74	1.25	1.14	1.92	1.9	0.73	1.17	0.98	2.77	2.28	1	0.94	0.97	0.91	0.63	0.26
BnaA08G0157200ZS	7.04	4.76	2.07	1.81	2.19	2.43	2.6	3.27	1.58	1.93	3.73	3.98	9.55	11.49	8.69	3.05	4.64	2.45	2.3	3.05	3.3	3.72	8.85
BnaC01G0087100ZS	6.78	4.28	1.76	1.8	1.61	1.8	1.87	1.65	1.95	1.92	2.97	3.68	2.18	3.31	2.35	5.16	3.79	2.42	2.02	2.13	2.26	1.31	1.39
BnaC03G0776000ZS	9.44	6.5	1.53	1.57	1.63	1.4	1.57	2.12	1.73	2.87	5.2	5.06	11.65	13.21	11.15	1.78	7.69	3.77	3.93	3.73	2.87	2.05	2.18
BnaC07G0344400ZS	0	0	0	0	0	0	0	0	0	0	0	0	0	0	0	0	2.87	0	0	0	0	0	0
BnaC06G0139200ZS	0	0	0	0	0	0	0	0	0	0	0	0	0	0	0	0	0	0	0	0	0	0	0
BnaC07G0493700ZS	0	0	0	0	0	0	0	0	0	0	0	0.64	0	0	0	0	1.23	0	0	0	0	0	0
BnaA03G0514900ZS	0	0	0	0	0	0	0	0	0	0	0	0.35	0	0	0	0	7.55	0	0	0	0	0	0
BnaA03G0515000ZS	0	0	0	0	0	0	0	0	0	0	0	0	0	0	0	0	1.4	0	0	0	0	0	0
BnaC07G0504300ZS	0	0	0	0	0	0	0	0	0	0	0	0	0	0	0	0	0.88	0	0	0	0	0	0
BnaA08G0156400ZS	0	0	0.02	0.02	0.05	0.03	0.11	0.1	3.03	1.91	0.02	29.28	7.88	0.14	14.24	1336.64	0.02	0	0	0	0	0.02	0.08
BnaC01G0085400ZS	0	0	0	0	0	0	0	0	0	0	0	0	0	0	0	0	0	0	0	0	0	0	0
BnaA08G0156600ZS	0	0	0	0	0	0	0	0	0	0	0.13	4.17	0.6	0.06	0.99	73.78	0	0	0	0	0	0	0
BnaA08G0156300ZS	10.88	10.58	3.42	3.12	3.48	5.17	5.53	7.21	3.85	5.42	4.52	9.76	11.65	14.69	18.9	16.2	8.79	4.73	5.44	4.86	4.5	9.42	15.62
BnaA03G0515800ZS	8.91	8.41	2.53	2.59	2.62	3.28	3.22	4.58	4.28	6.61	7.68	10.52	8.02	8.73	6.69	2.65	11.73	6.29	7.75	3.17	1.87	3.06	3.27
BnaC01G0085100ZS	13.7	11.67	4.21	4.27	4.05	5	5.3	5.77	6.78	9.27	7.73	7.26	8.71	8.4	7.73	0.7	14.6	9.21	10.87	9.2	5.52	6.62	6.88
BnaC03G0774700ZS	16.28	16.83	5.79	5.63	6.23	7.93	8.05	10.55	5.39	7.08	6.74	9.82	12.82	15.23	15.12	8.96	10.67	9.21	10.85	11.83	10.7	13.09	14.84
BnaA01G0071900ZS	23.85	17.97	8.93	10.08	9.38	12.06	13.95	13.53	9.4	10.48	11.14	16.03	23.86	21.68	19.24	3.31	20.43	13.58	15.1	13.85	8.72	12.45	18.95
BnaC07G0494300ZS	12.31	9.53	2.59	2.75	2.65	3.35	3.36	3.87	3.85	4.78	4.74	5.71	5.82	5.86	5.75	0.46	8.51	4.06	5.82	3.35	2.15	2.91	3.18
BnaC03G0774400ZS	7.03	7.07	4.82	4.27	4.53	3.51	3.42	3.1	9.57	11.51	29.96	11.38	3	4.89	10.93	6.56	12.52	5.42	6.02	8.95	6.06	4.34	1.74
BnaA01G0065000ZS	6.99	3.94	2.64	3.18	4.15	3.21	4	7.46	4.04	4.71	13.03	6.14	3.01	6.62	1.34	0.21	8.91	4.54	4.8	7.32	7.89	8.14	8.4
BnaC01G0078100ZS	7.33	4.41	1.35	1.28	1.31	0.98	1.02	1.15	2.55	3.93	10.7	4.98	0.74	1.81	0.45	0.06	11.02	3.73	2.86	3.99	5.18	3.13	2.49
BnaA01G0064700ZS	1.73	3.75	0.92	0.65	0.85	1.09	0.94	1.67	0.46	3.2	11.28	1.23	5.49	1.78	1.72	0.88	0.32	0	0.04	0.11	0.25	0.11	1.59
BnaC01G0077700ZS	4	1.18	1.9	2.59	1.96	1.31	1.79	2.71	2.79	6.74	9.07	0.45	4.78	1.14	0.93	0.04	0.67	1.04	1.33	2.95	1.1	1.27	1.81
BnaC03G0766300ZS	0.1	0.02	2.18	0.58	1.11	2.2	2.09	0.8	0	0.09	0.78	1.25	0.07	0	0	0	0	0	0	0.05	0	0.08	0
BnaA03G0528300ZS	6.71	4.75	3.28	3.28	3.75	4.34	4.34	4.85	2.8	3.2	6.03	3.73	7.15	9.64	7.33	0.85	5.83	5.73	4.58	5.28	6.57	6.97	9.84
BnaA08G0148500ZS	10.47	6.71	3.01	2.99	3.22	4.94	5.58	5.5	2.17	2.78	5.43	2.84	7.02	6.59	6.23	0.25	6.62	3.69	4.56	5.96	7.05	8.5	7.02
BnaC03G0763400ZS	0.38	0.26	0.05	0.02	0	0	0.02	0	0	0	0.57	0.19	0.03	0.07	0	0	0.72	0.03	0.04	0.04	0.09	0.01	0
BnaC07G0506000ZS	6.71	4.47	2.4	1.93	2.26	2.54	2.43	3.29	2.42	3.11	8.31	3.78	3.05	5.51	2.76	0.22	6.82	5.88	4.96	6.18	7.4	7.59	8.37
BnaC01G0066600ZS	6.75	2.49	1.07	0.65	1.28	1.43	1.16	2.06	3.29	1.49	3.25	2.02	0.7	0.99	0.34	0.04	3.7	3.19	2.35	2.93	1.94	1.21	1.37
BnaA01G0051100ZS	40.7	28.39	12.38	12.5	14.14	14.68	14.65	24.73	16.19	19.87	70.41	19.05	8.81	10.03	4.04	0.28	32.93	18.98	20.91	22.1	23.05	17.67	19.15
BnaA08G0144000ZS	4.39	4.16	0.95	0.75	0.66	0.49	0.38	0.4	1.57	1.28	11.29	17.12	1.81	0.68	1.24	25.33	11.34	0.81	0.75	0.52	0.16	0.03	0
BnaC03G0757700ZS	4.23	4.4	0.68	0.46	0.68	0.27	0.08	0.11	2.19	2.06	14.37	15.06	1.84	1.05	1.1	25.93	14.05	1.17	0.68	0.41	0	0	0
BnaA01G0048800ZS	0	0	0.03	0	0	0	0.05	0.11	0.2	0.64	3.05	0.56	2.28	10.64	9.18	0	0.83	1.42	0.5	3.51	5.44	0.52	0.24
BnaA08G0143200ZS	3.35	2.98	21.16	21.06	23.07	39.45	49.07	65.13	27.89	10.38	4.65	0.54	2.15	0.82	0.01	0	1.3	4.66	7.79	3.83	8.87	46	18.62
BnaA01G0048200ZS	2.22	0.84	1.39	1.13	1.94	5.87	13.32	11.45	0.5	0.03	0.48	0.03	1.28	0.05	0.03	0.04	0	9.88	23.47	12.02	37.35	278.63	388.38
BnaC03G0756500ZS	4.61	6.77	36.7	35.36	37.02	50.41	51.37	59.87	36.75	16.97	4.55	0.79	1.38	0.91	0.02	0.04	2.4	9.59	15.41	6.43	12.8	50.94	13.54
BnaA01G0046300ZS	11.7	8.89	8.44	8.2	9.34	10.96	11.36	9.21	8.06	6.53	8.22	8.13	16.7	24.96	29.25	2.94	7.59	4.63	6.31	6.53	6.16	5.11	8.84
BnaC01G0053100ZS	9.3	8.91	7.92	7.65	8	10.59	10.16	10.28	7.5	7.34	7.77	7.66	23.58	32.31	37.44	4.05	7.98	3.99	5.58	6.1	5.86	6.14	9.07
BnaC01G0057400ZS	5.71	3.88	2.68	2.69	2.63	3.33	4.15	4.8	2.79	2.39	3.5	3.45	6.96	9.6	5.69	0.83	4	1.14	2.22	3.22	2.19	2.45	1.77
BnaA01G0045000ZS	7.37	7.36	8.32	8.85	8.33	7.73	7.37	8.53	12.79	10.34	4.95	4.34	2.68	2.29	1.62	0	10.89	8.56	9.52	16.86	17.43	13.3	8.22
BnaC01G0051300ZS	3.98	4.38	5.34	5.31	5.61	6.19	7.45	8.92	6.55	6.08	7.1	4.23	14.54	12.49	7.89	0.61	6.84	4.4	5.99	6.17	6.91	7.2	6.4
BnaA01G0043500ZS	13.63	11.02	6	6.06	6.44	8.02	8.33	9.52	6.3	7.88	13.5	10.85	19.04	23.9	22.52	7.47	12.39	11.57	12.26	12.12	13	19.87	28.87
BnaA03G0538500ZS	14.46	11.43	6.98	7.12	8.27	9.64	11.48	14.62	5.37	6.74	10.05	8.09	15.34	22.54	17.76	2.92	11.73	7.34	9.88	11.55	10.12	11.88	10.76
BnaA08G0140300ZS	3.46	3.49	1.83	1.66	2.38	2.4	1.86	2.44	2.95	4.37	12.61	5.6	6.12	7.57	6.65	2.68	7.72	5.2	5.03	6	5.05	6.11	6.77
BnaC07G0514900ZS	36.11	25	11.83	11.97	12.77	15.59	16.07	18.64	6.65	8.33	13.28	11.6	20.2	26.86	23.93	3.04	18.08	15.4	16.15	20.44	20.19	23.54	17.29
BnaC07G0517200ZS	0	0.01	0.51	0.5	0.35	0.44	0.62	0.53	0	0	0.33	106.11	36.5	13.54	7.52	504.39	0.29	0.01	0	0.01	0	0.04	0.03
BnaA03G0395200ZS	23.35	20.74	28.02	28.07	28.42	35.97	41.11	48.5	15.83	25.03	24.27	27.1	37.46	39.49	20.26	18.11	10.49	4.35	8.47	12.15	19.37	28.21	32.7
BnaA01G0039900ZS	71.37	79.88	0.32	0.21	1.15	0.33	1.5	3.1	1.49	2.9	14.06	10.63	2.13	0.01	0.1	0.77	39.2	10.07	21.88	25.22	53.21	6.96	1.01
BnaC01G0045700ZS	18.98	7.21	0.51	0.32	0.56	0.27	0.54	0.4	3.44	5.72	14.17	8.95	1.74	0.29	0.23	0.03	18.41	4.68	6.57	3.88	5.08	0.81	0.36
BnaA01G0037200ZS	1.22	1.31	0.5	0.46	0.61	1.32	1.9	2.32	6.05	21.55	2.89	0.05	0.53	0.7	1.16	0	0.18	1.7	2.13	4.71	1.82	6.72	1.73
BnaC01G0042600ZS	0.39	1.22	1.05	1.09	0.96	1.79	1.41	0.14	5.11	21.82	1.99	0.14	0.05	0.71	1.1	0	0.11	1.51	3.42	4.32	0.5	0.53	0
BnaA08G0134600ZS	0.66	1.38	0.1	0.16	0	0.38	0.06	0	0	0.84	0	0.03	0	0	0	0	0.09	0.17	0.45	2.07	3.14	0.1	0
BnaA01G0034500ZS	0	0.07	0	0.03	0.01	0	0	0.11	0	0	252.48	0	0.04	0.06	0.05	0	0.15	0.15	0.06	0.07	0.17	0.05	0.07
BnaA08G0132500ZS	0.04	0.04	0	0	0.05	0	0.05	0.04	0	0	129.16	0.03	0.05	0.02	0	0.04	0	0.04	0.04	0.05	0	0.09	0.12
BnaC03G0742300ZS	0.02	0	0	0.02	0	0	0	0.02	0	0	108.61	0.03	0.11	0	0	0	0.06	0.03	0	0	0	0.03	0.07
BnaC07G0523400ZS	0	0	0	0	0	0	0	0	0	0	119.69	0	0	0	0	0	0	0	0	0	0	0	0
BnaA01G0033800ZS	0.05	0.12	0.02	0.02	0.01	0	0	0.05	0	0.01	0.01	2.04	0.16	0.15	0.03	3.38	0.18	0.07	0.01	0.02	0	0.02	0.07
BnaC01G0038800ZS	0	0.13	0.03	0	0.02	0	0	0.05	0	0.02	0.04	1.67	0.11	0.08	0.03	2.6	0.01	0.14	0.02	0.01	0.01	0.02	0.03
BnaA08G0180000ZS	0	0	0	0.02	0	0	0	0	0	0	464.24	0	0	0	0	0	0.25	0	0	0	0	0	0
BnaC01G0034600ZS	0.11	0.01	0.05	0	0.02	0	0.19	0.31	0.02	0.05	67.56	3.22	0.21	0.27	0.39	0	9.7	0	0	0.02	0	0	0
BnaC03G0697800ZS	0	0	0	0	0.02	0	0	0	0	0	413.85	0	0	0.03	0	0	0.43	0	0	0	0	0.02	0
BnaA01G0029000ZS	3.92	2.95	2.38	2.13	2.19	2.89	3.4	3.55	2.72	3.72	5.51	4.16	5.33	7.46	6.11	3.21	3.6	2.44	2.35	3.52	3.46	4.22	5.43
BnaC01G0033800ZS	5.32	3.79	2.44	2.17	2.53	2.56	2.97	4.01	1.9	2.31	4.17	4.09	4.9	8.36	7.53	2.03	2.86	1.71	2.54	3.05	3.33	4.04	4.03
BnaA08G0179100ZS	0	0	0	0	0.02	0.02	0	0	0	0	0.15	4.04	0.06	0.09	0	1.18	0.04	0	0	0	0	0	0
BnaC03G0699300ZS	0	0.04	0	0.02	0	0	0	0.02	0	0	0.04	4.79	0.04	0.02	0.04	1.23	0	0	0.04	0	0	0.05	0.06
BnaA01G0026200ZS	3.43	2.87	0.93	0.52	0.39	0.6	0.59	0.36	0.08	1.03	0.18	0.03	0.03	0.03	0	0	0.3	0.23	0.2	0.11	0.32	0.99	0
BnaC01G0031000ZS	1.41	0.17	0.02	0.08	0.15	0.02	0.03	0.18	0.11	0.12	0.34	0.46	0	0.01	0	0	0.27	0.05	0	0.03	0	0	0
BnaA03G0553300ZS	2.41	2.83	3.27	3.44	4.01	5.28	14.44	15.73	1.95	4.76	1.28	0.85	23.78	17.38	9.41	0.19	0.76	16.4	16.33	6.57	14.43	31.44	25.33
BnaC07G0529600ZS	2.51	7.1	9.69	10.34	11.08	11.83	25.29	21.7	2.32	5.74	0.88	0.76	24.51	17.03	4.27	0.03	0.53	9.44	11.58	5.66	7.62	22.31	17.04
BnaA01G0024700ZS	5.73	2.51	0.53	0.34	0.5	0.49	0.25	0.17	0.78	1.63	1.62	0.42	0.34	0.35	0.1	0	3.47	1.93	2.12	4.18	1.37	0.48	0.14
BnaC01G0029000ZS	1.5	1.08	0.24	0.33	0.33	0.27	0.11	0.07	0.51	0.9	0.97	0.46	0.1	0.15	0.05	0	3.23	0.71	1.29	2.52	1.3	0.69	0.09
BnaA01G0023500ZS	0	0	0	0	0	0	0.19	0.27	0.12	0.02	1.16	0.1	0.09	0	0	0	0.57	0	0	0	0	0	0
BnaA03G0554300ZS	0	0	0	0	0	0.02	0.09	0.31	0.09	0.01	1.99	0	0	0	0	0	0.04	0	0	0	0	0	0
BnaC01G0027600ZS	0	0	0	0	0	0	0	0.22	0.05	0.06	0.38	0	0.02	0	0	0	0.09	0	0	0	0	0	0
BnaC07G0530800ZS	0	0.05	0.11	0.38	0.04	0.34	0.81	1.02	0.1	0.07	1.98	0.23	0.43	0	0.02	0.04	1.34	0.32	0.35	0.41	0.16	0.13	0.07
BnaA01G0022700ZS	2.69	2	1.25	1.23	1.21	1.44	1.37	1.18	0.92	1.26	5.81	2.79	1.55	2.1	2.38	0.37	2.33	0.49	1.26	0.91	0.73	0.39	0.7
BnaA03G0555600ZS	14.24	8.88	4.95	4.99	6.24	7.48	7.7	10.46	5.53	7.14	10.21	9.42	8.5	7.5	7.33	2.29	9.43	7.29	7.46	6.82	8.8	9.95	8.31
BnaC01G0026400ZS	0.46	0.49	0.29	0.41	0.32	0.39	0.36	0.46	0.19	0.01	0.07	0.1	0.88	1.34	0.62	0	0.11	0.16	0.28	0.52	0.2	0.09	0.16
BnaC07G0531900ZS	9.71	7.72	7.56	7.6	7.81	9.44	10.63	12.22	6.55	5.27	7.63	8.02	8.32	7.09	6.03	1.95	7.22	4.76	6.42	6.01	5.79	7.08	5.99
BnaA01G0016800ZS	6.06	1.69	0.52	0.54	0.44	0.63	1	1.45	4.55	3.4	11.72	10.43	0	0.17	0.09	1.27	18.88	1.62	3.02	3.21	3.57	2.37	4.74
BnaA03G0561000ZS	7.67	0.74	0.74	0.82	1.02	1.58	3.15	3.48	3	2.5	11.91	11.37	9.78	37.99	12.34	1.26	16.72	2.73	3.28	8.55	8.65	5.55	5.08
BnaC01G0019400ZS	9.35	4.21	0.76	0.75	0.83	1.34	1.55	1.95	7.23	5.48	13.07	13.46	9.71	35.25	16.04	0.63	20.34	2.37	4.01	5.03	5.17	3.71	7.96
BnaC07G0536500ZS	7.39	1.5	0.75	0.89	0.98	1.96	3.14	2.48	5.64	5.08	16.28	9.64	17.99	50.95	19.04	0.58	17.7	6.01	11	11.83	9.34	6.17	7.9
BnaA01G0016900ZS	0.4	0.07	0.02	0.1	0.13	0.05	0.07	0.32	0.04	0.2	7.15	1.04	0	0	0	0	4.7	3.04	6.11	3.98	2.48	2.7	6.41
BnaA08G0185800ZS	0.05	0	0.04	0	0.02	0.02	0.08	0.06	0.08	0.34	0.72	0.06	0	0	0	0.12	0.23	0.19	1.49	0.57	0.26	0.25	0.6
BnaC01G0019500ZS	0.07	0.1	0	0.02	0	0	0.04	0.07	0.44	1.34	4.67	1.02	2.08	2.68	1.48	0.1	2.64	1.2	2.24	2.24	0.54	0.74	2.18
BnaC03G0689500ZS	0.02	0.15	0.03	0.01	0.14	0.12	0.22	0.43	0.15	0.33	2.83	0.94	0.09	0.1	0.39	0.19	2.34	3.02	9.06	1.65	3.47	2.59	9.68
BnaA01G0017800ZS	0	0	0	0	0	0.02	0	0	0	0	44.34	0	0	0.02	0.08	0.05	0	0	0.07	0.05	0.13	0	0.13
BnaA03G0560000ZS	0	0.01	0.07	0.08	0.18	0.04	0.01	0.03	0	0	0.28	1.01	0.6	0.56	1.63	0	1.03	0.9	4.67	15.31	13.02	16.38	51.89
BnaC01G0020500ZS	0	0	0.02	0.17	0.07	0	0	0.02	0.03	0	46.84	0	0	0.02	0.28	0	0	0	0.03	0.06	0.03	0	0.21
BnaC07G0535500ZS	0.02	0.04	0	0.13	0.08	0.02	0	0.05	0	0.02	0.85	0.48	2.13	1.95	71.1	0.02	0.83	0.06	0.4	2.04	19.46	5.15	16.03
BnaA01G0015600ZS	97.16	120.64	86.55	85.98	80.52	99	103.22	88.57	57.65	70.41	78.53	31.23	0	1.55	0	2.78	166.18	133.57	106.92	155.17	111.95	78.8	57.8
BnaA03G0561800ZS	0	0.02	0	0	0	0	0.14	0.17	0.17	0.05	0	0	0	0	0	0	0	0	0	0.14	0.08	0.35	0
BnaC01G0018400ZS	142.17	219.76	73.23	71.69	62.33	72.33	74.05	61.73	86.49	106.85	99.99	29.7	190.74	245.4	240.4	6.91	173.58	227.04	181.39	285.86	228.33	114.44	84.91
BnaC07G0537300ZS	29.55	25.68	53.96	50.62	45.96	37.9	44.69	39.28	51.32	37.12	42.15	8.46	7.67	5.26	11.13	0.35	53.66	41.74	27.96	49.57	49.71	39.18	27.65
BnaA01G0012600ZS	6.75	10.04	0.34	0.26	0.45	0.37	0.17	0.04	0.86	3.57	14.15	1.44	0	0	0	0	2.78	0.28	0.31	0.18	0	0	0
BnaA08G0188100ZS	5.23	7.45	0.6	0.39	0.61	0.53	0.12	0.04	0.43	1.56	1.88	0.73	0.28	0.56	0.91	0	0.92	0.22	0.13	0.11	0	0	0
BnaC01G0014900ZS	7.11	13.18	0.47	0.58	0.38	0.22	0.08	0.06	0.98	3.11	13.85	1.22	0.02	0.01	0	0	3.1	0.43	0.45	0.19	0	0	0
BnaC07G0540500ZS	9.81	10.86	0.68	0.72	0.59	0.6	0.35	0.14	1.2	2.45	9.89	0.69	0.19	7.41	3.26	0	2.95	0.23	0.28	0.07	0.04	0.03	0.09
BnaA03G0566300ZS	15.33	20.69	2.72	2.96	2.38	3.65	2.99	1.2	0.51	7.33	2.39	3.07	0.43	0.71	0.49	0.75	6.89	2.97	4.82	10.29	6.14	0.42	0.03
BnaC07G0541100ZS	10.97	13.64	4.61	4.57	4.49	6.87	6.55	5.85	0.62	5.22	0.76	2.6	0.97	1.79	2.11	1.03	3.32	1.54	2.37	5.35	6.16	3.53	0.49
BnaA07G0071300ZS	25.79	28.39	22.56	21.92	24.47	21.22	17.51	12.62	30.98	32.02	26.72	14.91	1.58	1.87	2.43	0.03	33.89	20.14	21.32	27.68	20	9.41	2.18
BnaC07G0110200ZS	18.75	21.45	16.2	16.3	15.58	13.58	9.45	7.42	25.01	26.89	22.64	8.64	1.05	1.3	1.85	0	29	17.1	19.75	23.96	17.91	5.04	1.19
BnaA06G0449400ZS	4.84	7.12	13.14	13.62	13.12	18.02	17.22	11.57	13.05	6.91	3.15	4.06	1.83	3.56	3.07	14.47	1.03	0.79	0.57	1.03	1.19	1.13	1.04
BnaA08G0198700ZS	0.81	0.42	10.06	9.34	11.54	8.66	7.71	2.28	6.91	5.28	1.45	2.79	0.22	0.13	0.38	3.06	0	0.12	0	0	0	0	0
BnaC03G0671800ZS	2.51	2.38	15.57	18.81	17.57	19.61	18.71	11.19	5.46	3.19	0.56	1.97	0.85	0.77	0.48	4.9	0	0.19	0.16	0	0.04	0.07	0.11
BnaC07G0546500ZS	12.11	13.54	17.79	18.36	17.13	16.35	15.06	7.84	15.04	7.73	7.72	6.63	0.88	0.74	0.98	7.38	1.04	0.43	0.37	0.94	0.72	0.33	0.1
BnaA08G0197600ZS	24.03	18.63	14.75	14.79	13.39	14.99	15.26	17.66	19.66	17.71	8.18	7.25	5.92	12.39	9.38	1.44	8.5	7.12	7.54	14.48	20.31	18.22	11.31
BnaC03G0673100ZS	20.43	18.21	12.8	13.36	13.83	15.05	15.09	24.84	24.73	22.39	12.39	12.53	8.81	13.72	13.18	3	12.83	77.32	12.88	9.12	44.13	38.58	39.51
BnaA08G0195700ZS	11.39	15.57	18.91	16.03	16.23	15.77	14.15	25.48	6.66	14.42	18.82	18.55	9.23	6.13	5.46	0.19	18.24	9.26	19.7	12.12	10.11	14.54	4.09
BnaC03G0675400ZS	8.71	9.42	7.23	7.47	7.04	7.54	6.11	11.17	4.64	12.31	9.26	9.27	5.99	1.88	1.49	0.07	13.48	7.55	12.23	9.82	7.61	8.76	2.26
BnaA01G0005400ZS	12.39	12.1	15.03	16.04	16.6	11.39	8.55	6.3	68.61	36.18	16.32	10.86	0.38	0.11	0.31	2.15	10.67	9.51	9.61	6.89	3.61	3.56	1.78
BnaC01G0006100ZS	5.9	8.71	10.23	11.86	12.6	8.55	7.71	6.4	32.98	28.73	11.98	9.32	6.25	4.11	5.28	4.67	15.26	14.77	14.95	15.89	9.59	4.33	2.06
BnaA01G0006200ZS	2.76	2.2	2.36	2.29	2.14	1.41	1.58	1.75	4.77	4.09	3.45	2.22	0	0	0	2.36	6.15	1.42	3.2	4.97	2.64	1.32	0.29
BnaC01G0007100ZS	3.25	3.55	7.72	7.42	8.18	6.22	7.78	7.81	7.11	4.88	3.55	2.61	4.64	3.13	2.59	0.3	6.1	2.3	5	7.69	4.81	4.99	2.88
BnaA03G0003000ZS	7.06	6.43	2.72	3.19	3.58	4.52	4.99	8.93	2.17	2.63	4.36	10.03	7.44	9.49	6.31	10.69	5.69	3.3	4.69	5.6	5.13	6.25	6.06
BnaC03G0005100ZS	5.83	6.5	3.02	2.69	3.26	4.44	4.52	7.93	1.76	2.58	3.07	6.21	5.79	5.36	3.92	5.81	4.77	2.97	3.96	5.59	5.5	6.88	5.45
BnaA03G0004800ZS	11.28	9.74	4.74	4.98	4.68	4.8	4.98	2.99	1.13	0.87	0.86	2.35	0.85	0.88	2.07	0.05	2.2	2.07	1.61	1.91	1.12	1.75	0.1
BnaA10G0299500ZS	42.6	42.69	5.15	4.57	4.92	5.64	4.01	4.29	0.48	2.54	6.61	6.03	24.47	11.56	44.41	0.03	13.98	8.4	9.29	14.29	8.11	13.9	3.85
BnaA02G0006700ZS	22.96	15.36	1.19	1.13	1.08	1.13	1.89	2.27	0.11	0.95	4.25	9.36	8.32	4.45	21.2	0.06	9.11	4.49	6.22	8.27	5.22	9.5	1.86
BnaC02G0004200ZS	36.77	23.98	1.78	1.96	1.63	1.72	1.86	2.42	0.11	0.44	5.77	10.91	0	0	0	0.1	8.22	4.1	5.35	4.4	2.66	7.94	2.82
BnaC03G0008000ZS	10.59	6.19	1.41	1.81	1.91	2.09	1.79	1.37	0.37	1.79	1.3	1.57	0.21	0.43	0.69	0.09	1.98	1.25	1.37	1.85	1.93	1.44	0.27
BnaC09G0620200ZS	38.64	41.49	4.52	4.35	3.97	4.37	3.03	2.57	0.1	1.33	4.71	5.5	19.45	4.69	24.09	0.07	12.36	6.93	7.72	11.22	5.46	6.51	2.76
BnaA02G0006900ZS	4.74	3.24	2.76	1.98	2.03	0.64	0.4	0.42	0.5	0.79	16.05	4.87	0.08	0	0	0	34.9	8.78	2.84	2.22	1.57	0.52	0.04
BnaC02G0004400ZS	0.18	0.54	0.42	0.68	0.51	0.07	0.02	0.02	0.29	0.42	5.97	2.79	0	0	0	0	13.88	2.6	0.88	0.33	0.21	0.06	0
BnaA10G0293300ZS	6.73	7.35	6.71	7.85	6.66	7.76	6.35	6.93	13.8	11.15	5.69	11.76	15.43	15.4	20.34	2.11	8.67	6.51	9.68	8.92	10.72	10.7	12.45
BnaA02G0010600ZS	2.61	3.46	1.1	1.84	1.3	1.16	1.06	1.52	1.4	2.87	4.59	4.15	8.1	8.53	9.86	0.55	2.27	1.89	2.68	2.44	4.47	2.03	3.16
BnaC02G0007900ZS	8.23	10.38	1.41	1.72	1.4	1.94	0.89	2.88	1.74	5.26	8.33	11.31	0.12	0.22	0.13	10.93	7	4.19	5.31	6.68	8.53	8.1	14.72
BnaC09G0613000ZS	7.03	6.59	5.48	4.98	5.7	5.06	5.33	4.74	6.89	6.91	3.6	10.67	11.45	9.71	18.21	1.72	6.84	5.02	6.87	5.79	7.15	6.22	7.95
BnaA03G0009700ZS	183.79	194.49	22.81	22.34	19.62	13.16	10.38	11.2	40.98	46.84	49.65	25.2	1.71	1.35	3.18	0.05	96.65	50.28	93.25	62.59	68.67	5.23	1.32
BnaC03G0013700ZS	158.18	212.93	17.92	16.76	14.6	9.93	8.5	9.36	30.68	24.92	43.24	15.73	1.97	2.77	3.2	0.68	54.06	24.42	81.74	71.93	75.11	2.96	4.66
BnaC09G0609200ZS	6.84	4.02	0.55	0.6	0.36	0.27	0.12	0.09	0.48	0.35	1.61	0.71	0.07	0.11	0.1	0.05	2.12	0.18	0.25	0.35	0.2	0.1	0.04
BnaC02G0011400ZS	3.67	1.92	0.01	0.04	0.01	0	0.01	0.01	0.03	0.01	0.32	0.28	0	0	0	0.26	1	0.01	0	0.08	0.08	0	0
BnaC03G0015800ZS	2.24	0.11	0.01	0	0.02	0	0	0.01	0	0.01	0.28	0.02	0.01	0.03	0.01	0	0.15	0	0.01	0	0	0	0
BnaA02G0013900ZS	4.01	3.59	4.52	4.63	5.22	6.76	7.8	9.72	2.06	3.45	3.12	3.33	12.63	15.93	8.84	0.63	6.16	3.82	4.51	8.14	5.61	9.31	7.66
BnaC02G0013700ZS	3.66	2.38	2.16	1.82	2.5	3.13	3.9	6.16	1.13	2.14	3	1.82	0	0	0	0.41	3.46	2.34	2.85	6.31	4.62	6.53	4.4
BnaA10G0288700ZS	0	0.04	0	0	0	0	0	0	0	0.02	0	0	0	0	0	0	0.48	0	0	0	0	0	0
BnaA02G0014100ZS	0	0	0.03	0.05	0	0.11	0.04	0	0	0.04	0.22	0.95	0.03	0	0	0	0.76	0	0	0	0	0	0
BnaA10G0283000ZS	7.61	6.38	3.37	3.07	3.32	3.46	2.78	3.69	4.37	4.51	4.64	4.97	2.14	1.72	2.35	0.15	7.42	3.22	5.55	3.54	2.54	2.89	3.17
BnaC09G0601100ZS	6.75	5.65	4.08	3.8	4.01	3.96	3.7	4.61	6.55	4.63	4.54	4.6	1.53	1.15	1.82	0.34	5.08	3.43	5.5	4.81	2.96	2.82	2.51
BnaA04G0264400ZS	0	0.02	0	0	0	0	0	0	0	0	0.05	0	0	0	0	0	0	0	0	0	0.23	0.13	0
BnaC04G0581600ZS	0.08	0.98	0	0	0	0	0	0.05	0	0	0.05	0	2.27	1.71	0.95	0	0	0	0	0	9.82	1.17	0.39
BnaA03G0020300ZS	3.14	1.46	0.66	0.64	0.85	0.95	0.85	0.93	1.07	1.11	3.57	1.38	0.64	0.91	0.46	0.02	3.14	1.62	1.61	2.27	1.19	1.24	0.92
BnaA02G0019900ZS	1.91	1.52	0.6	0.53	0.77	0.5	0.64	0.82	1	1.21	3.73	1.27	0.61	1.32	0.5	0.01	3.75	1.4	1.7	1.69	1.11	1.88	0.96
BnaC02G0020900ZS	3.22	2.28	1.12	1.3	1.43	1.64	1.54	1.86	1.64	2.54	3.84	1.49	0	0	0	0.12	2.61	1.6	2.14	2.49	1.87	2.76	3.28
BnaC03G0025100ZS	1.1	1	0.29	0.27	0.36	0.3	0.35	0.62	0.47	0.84	1.71	1	0.3	0.32	0.14	0.33	2.07	1.34	1.4	2.02	1.22	1.35	0.58
BnaA03G0020900ZS	0	0.02	0	0.03	0	0	0	0	0.01	0.02	0.27	0	0	0	0	0	0.07	0	0	0	0	0	0
BnaC03G0025500ZS	0	0	0	0	0	0	0	0	0	0.01	0.03	0	0.01	0	0	0	0.08	0	0	0	0	0	0
BnaA10G0272400ZS	3.22	4.13	6.33	7.07	7.64	13.74	18.5	21.02	1.35	1.92	2	2.62	14.9	7.37	8.53	0.17	0.42	0.57	1.28	3.59	4.53	15.02	16.63
BnaC09G0589700ZS	9.58	8.79	18.49	20.37	20.91	30.25	35.6	36.84	6.79	11	5.94	4.75	49.21	40.28	45.06	1.58	4.02	8.32	11.32	22	18.42	38.49	44.47
BnaA03G0022200ZS	0	0	0	0	0	0	0	0	0	0	0.01	0.03	0	0	0	0	0.13	0	0	0	0	0	0
BnaA10G0270700ZS	0.12	0.03	0.03	0.02	0	0	0	0	0.06	0.02	0.06	0	0	0	0	0	0.12	0	0	0	0	0	0
BnaC09G0587300ZS	0	0	0	0	0	0	0	0	0	0	0	0	0	0	0	0	0.14	0.02	0.03	0	0	0	0
BnaC03G0026900ZS	0	0	0	0	0	0	0	0	0	0	0.15	0.2	0	0	0	0	0.06	0	0	0	0	0	0
BnaC09G0581300ZS	3.31	2.66	0.16	0.18	0.08	0.23	0.13	0.64	0.05	0.64	0	0	0	0	0.13	0	5.74	58.54	35.55	3.07	1.19	0.24	0.05
BnaC09G0580800ZS	0.1	0.09	0	0.03	0	0	0	25	0.45	0.03	2.29	2.35	7	0.36	16.19	0.85	0	0.14	0.09	0.25	0.2	0	0.49
BnaC02G0025400ZS	0.07	0.03	0	0	0	0	0	0	0	0.02	0	0	0	0	0	0	0	0	0	0	0	0	0
BnaA10G0260900ZS	0.02	0.56	0.18	0.1	0.17	0.29	0.25	0.23	0.51	0.5	15.59	1.09	0.19	0.1	0.01	0.03	0.92	0.07	0.02	0.08	0.01	0.06	0.08
BnaA10G0261200ZS	9.96	8.26	6.41	7.02	7.24	8.13	8.42	12.05	5.72	4.98	43.01	20.52	18.09	24.36	24.48	39.18	6.06	4.46	7.51	7.49	6.16	10.07	12.37
BnaA10G0261800ZS	8.06	7.82	5.57	5.23	5.14	5.24	9.81	17.77	9.95	9.15	9.85	9.3	53.87	46.53	101.74	3.12	4.89	22.72	39.24	8.83	25.45	96.92	94.33
BnaC09G0576000ZS	9.12	7.9	7.41	7.51	8.87	8.79	9.61	10.21	10.13	11.07	11.26	9.06	15.95	17.26	38.02	3.41	3.85	12.85	20.28	8.95	15.55	31.86	18.26
BnaA10G0262700ZS	0	0	0	0	0	0	0	0	0	0	0.54	0	0	0	0	0	0	0	0	0	0	0	0
BnaC09G0577100ZS	0	0	0	0	0	0	0	0	0	0	0	0	0	0	0	0	0.03	0.03	0	0	0	0	0.03
BnaA03G0028000ZS	0	0	0	0	0	0	0	0	0.01	0	0.02	0	0.63	0.3	0	0	0.13	0	0	0	0	0	0
BnaC03G0034800ZS	0	0	0	0.06	0	0	0	0	0	0	0.48	2.64	2.03	0.58	0.33	0.94	0	0	0	0	0	0	0
BnaA10G0263100ZS	0	0	0	0	0	0	0	0	0	0	0.15	0	0	0.02	0	0	0	0	0	0	0	0	0
BnaC09G0577500ZS	0	0	0	0	0	0	0	0	0	0	0	0	0	0	0	0	0	0	0	0	0	0	0
BnaC03G0039200ZS	4.43	4.69	1.57	2.06	1.99	1.96	1.77	2.52	2.58	3.62	4.27	3.47	4.45	3.87	4.71	0.51	5.11	5.79	4.72	4.06	5.52	4.87	4.85
BnaA03G0033200ZS	26.76	25.05	19.27	19.06	19.77	22.2	21.63	24.62	13.22	17.45	29.53	23.87	30.72	43.94	42.28	7.1	26.02	18.95	18.6	20.39	17.38	19.17	21.43
BnaA10G0253500ZS	3.24	2.29	1.74	1.74	1.51	2.07	2.34	2.42	1.77	1.35	3.67	1.33	1.8	1.23	1.89	0.27	2.86	0.97	1.84	2	1.33	1.16	1.68
BnaC03G0040200ZS	17.64	16.49	12.84	11.78	12.33	14.1	14.68	17.24	10.57	13.43	20.97	16.28	14.6	17.55	16.38	4.06	19.59	12.56	12.34	13.32	12.86	12.85	14.35
BnaC09G0567200ZS	3.76	3.47	2.43	1.86	1.98	2.31	2.2	2.39	2.41	1.57	4.13	1.56	1.73	1.15	1.07	0.04	3.51	2.07	2.23	2.34	1.47	1.35	1.21
BnaA02G0033000ZS	0	0	0	0	0	0	0	0	0	0	11.34	0.93	0	0.04	0	0	0.12	0.03	0.1	0.03	0	0.07	0.23
BnaC09G0560800ZS	0.19	0.17	0	0	0	0	0	0	0	0	0.18	0	0	0	0	0	0.09	0.04	0	0.09	0	0	0
BnaC02G0036600ZS	0	0	0	0	0	0	0	0	0	0	6.66	1.11	0	0	0	0	0.14	0	0	0.11	0.2	0.87	0.78
BnaA10G0247200ZS	1.64	0.8	0.22	0.13	0.36	0.48	0.34	0.4	0.71	1.95	0.24	0.69	0.42	0.12	1.06	0	0.33	2.75	0.35	2.27	1.85	0.26	0.33
BnaC09G0560300ZS	1.3	0.5	0	0.05	0	0	0.02	0	0.12	0.84	0.3	0.66	0.75	1.68	5.82	0	0.33	1.12	0.23	0.36	1.85	0.14	0
BnaA10G0244900ZS	0	0	0	0	0	0	0	0	0.16	0	0	0	0	0	0	0	0	0	0	0	0	0	0
BnaC09G0556800ZS	0	0	0	0	0	0	0	0	0	0	0	0	0	0	0	0	0.05	0	0	0	0	0	0
BnaA10G0244800ZS	0.1	0	0	0.05	0	0	0	0	22.7	20.35	2.09	0.45	0	0.38	0.09	1.81	0	0	0	0	0.03	0	0
BnaC09G0556100ZS	0	0	0	0.1	0	0	0	0	0.45	1.07	0	0	0	0	0	0.04	0	0	0	0	0	0.1	0
BnaA10G0243900ZS	13.77	13.47	10.93	10.52	11.13	11.37	10.71	11.17	6.64	7.12	17.15	15.53	15.74	19.97	20.29	3.44	15.08	10.13	10.99	13.41	14.2	12.99	13.39
BnaC09G0555100ZS	19.94	18.37	12.6	13.27	13.82	15.15	15.09	14.94	7.57	10.4	20.79	16.76	22.61	25.53	27.7	5.37	19.1	13.21	13.35	18	19.88	19.16	17.35
BnaA03G0040900ZS	4.24	2.83	0.27	0.11	0.13	0.17	0.21	0.33	0.27	0.26	2.99	0.86	0.05	0.12	0.25	0.24	1.52	1.33	0.91	0.24	0.46	1.15	1.45
BnaA10G0241800ZS	1.12	1.76	0.12	0.13	0.1	0.08	0.03	0.04	0.47	0.4	4.33	0.71	0	0.01	0	0.03	1.28	0.13	0.09	0.12	0.02	0	0.03
BnaA03G0043300ZS	2.13	5.72	1.09	0.82	0.99	2.13	0.88	1.09	0.28	0.28	0.3	0.68	2.67	3.33	7.08	0.33	1.11	1.07	0.97	0.34	0.71	0.86	1.63
BnaC03G0050300ZS	9.78	17.06	8.08	8.31	9.31	12.87	13	11.67	1.01	0.67	1.99	2.05	1.35	0.91	2.12	0.2	2.61	2.27	3.06	1.13	2.53	9.35	3.9
BnaA02G0040500ZS	3.39	4.47	5.23	4.89	5.63	5.92	6.57	4.7	2.14	2.04	4.44	3.55	1.81	3.25	2.07	0.6	2.61	2.11	1.9	2.98	2.23	1.84	1.53
BnaC02G0046300ZS	0.7	0.97	1.52	1.38	1.59	1.83	1.73	0.92	0.48	0.43	1.97	1.4	1.07	2.59	3.04	0.11	1.16	0.38	0.49	0.86	0.56	0.42	0.34
BnaA06G0338900ZS	0.07	0.05	0.25	0.28	0.26	0.16	0.27	0.44	0.58	0.33	3.43	2.39	0.32	0.63	0.38	2.04	1.48	0.09	0.07	0.01	0.02	0.01	0.04
BnaC07G0355300ZS	2.49	0.61	1.5	1.61	1.65	1.99	3.01	3.06	0.69	0.91	1.56	2.21	2.82	3.32	3.78	3.38	0.99	0.11	0.16	0.32	0.16	0.17	0.29
BnaA02G0041600ZS	64.66	55.04	21.68	21.29	21.3	26.43	25.67	31.9	16.83	26.99	32.09	57.38	37.95	37.97	47.08	33.26	50.59	34.74	39.13	42.24	35.01	32.87	37.58
BnaA10G0233400ZS	18.73	13.34	9.28	9.58	10.71	13.7	15.87	18.52	5.94	6.87	8.62	15.13	10.6	12.29	8.99	4.1	10.21	6.67	7.97	10.78	8.27	9.98	9.63
BnaC02G0048000ZS	54.74	49.47	17	17.74	17.2	20.69	19.32	26.33	16.6	31.88	28.49	46.96	35.17	36.11	44.65	22.47	37.2	32.69	38.38	37.82	33.5	31.13	32.61
BnaC09G0539500ZS	20.2	18.03	12.83	11.69	13.29	15.32	17.23	17.86	7.26	9.05	17.85	21.39	13.93	10.58	10.34	5.22	13.94	9.33	9.24	12.88	11.35	13.01	10.91
BnaA02G0043100ZS	18.68	14.38	5.97	5.94	6.08	6.69	5.56	8.02	4.77	6.94	12.84	14.02	7.1	6.12	6.97	3.07	16.7	8.33	11.66	9.73	8.47	7.55	7.39
BnaC02G0049500ZS	25.1	19.63	7.73	8.31	8.05	9.84	8.66	8.86	7.2	12.63	19.86	18.77	10.63	9.09	9.95	1.89	19.4	15.1	16.51	15.98	13.94	12.45	11.48
BnaA10G0228900ZS	1	1.2	0.5	0.51	0.55	0.52	0.07	0	1.23	1.16	3.44	1.52	0.76	0.18	0.56	0.09	6.33	1.5	0.65	0.37	0.34	0	0
BnaC09G0534500ZS	1.89	2.49	0.43	0.41	0.11	0.16	0.51	0.3	0.1	0.98	6.57	1.66	1.22	0.71	1.31	0.26	9.3	2	0.82	0.32	0.43	0.02	0.07
BnaA02G0044500ZS	0.1	0	0	0	0	0	0	0	0.03	0.07	2.15	0.2	0.09	0	0	0	0.09	0	0	0	0	0	0
BnaA02G0045100ZS	5.43	6.29	4.89	6.79	7.15	6.53	8.62	4.83	4.21	5.37	7.88	2.38	3.29	5.21	4.93	1.07	5.34	5.21	4.15	8.64	5.31	4.07	2.17
BnaA03G0050200ZS	0	0.04	0.04	0.14	0.11	0.04	0.19	0.04	0.09	0	0	0	0.19	0.8	0.32	0.01	0.05	0	0.02	0	0	0.03	0
BnaA10G0226800ZS	16.26	13.72	10.8	11.13	11.88	14.73	15.11	14.1	7.84	5.22	10.69	5.91	7.86	8.22	7.38	4.38	5.19	4.29	3.8	4.92	8.32	13.91	18.04
BnaC02G0051800ZS	0.32	0.35	1.92	1.62	1.46	1.29	1.19	1.06	2.72	0.47	1.69	0.13	0.07	0	0	0	0.26	0.26	0.22	0.56	0.51	0	0
BnaC03G0058100ZS	8.44	6.52	7.07	7.12	7.26	8.98	9.92	10.97	4.38	2.86	4.77	3.62	5.25	7.27	4.13	1.84	4.67	3.72	3.81	4.32	5.23	6.95	7.55
BnaC09G0532200ZS	11.39	10.43	9.24	8.51	10.1	11.64	14.38	14.76	8.46	6.04	12.46	5.61	9.8	12.41	11.69	2.61	8.37	7.68	5.73	5.87	10.47	14.13	16.34
BnaA01G0262300ZS	0	0	0	0	0	0	0	0	0	0	0	0	0	0	0	0	0	0	0	0	0	0	0
BnaA02G0046600ZS	137.72	14.93	0.6	0.92	0.26	0.04	0	0	17.55	11.77	35.29	21.08	0.03	0	0	0	38.68	4.88	2.41	0.08	0	0	0
BnaA10G0224500ZS	35.6	13.32	0.95	0.64	0.56	0	0	0.07	14.99	12.82	23.21	25.34	0	0	0	0.04	24.46	2.9	2.28	1.71	0	0	0
BnaC02G0053300ZS	132.84	16.07	3.18	2.86	2.2	0.05	0	0	25.51	19.59	32	15.57	0	0	0	0	41.65	10.89	5.9	0.67	0	0	0
BnaC09G0529500ZS	19.31	3.74	1.18	0.88	0.44	0.08	0	0	20.12	9.25	36.25	40.73	0.12	0.03	0	0	30.34	0.97	0.51	0.26	0.05	0.05	0
BnaA03G0052000ZS	0.09	0.18	0.29	0.25	0.32	0.43	0.69	0.49	0.14	0.13	0.07	8.29	0.64	0.29	0.18	10.03	0.16	0.04	0	0.01	0	0.05	0.01
BnaC03G0059900ZS	0	0.05	0.26	0.23	0.27	0.36	0.28	0.39	0.16	0.27	0.1	6.8	0.25	0.16	0.11	6.25	0.06	0.05	0	0.04	0	0.05	0.04
BnaA10G0222900ZS	7.87	6.2	1.57	1.84	1.65	2.68	2.29	2.17	3.43	2.31	4.98	1.23	0.63	1.15	1.09	0.03	8.09	1.18	1.07	0.97	1.03	1	0.21
BnaC03G0060900ZS	0.37	0.25	0.06	0.07	0.02	0.05	0.1	0.08	0.42	0.69	0.77	0.02	0	0	0	0	0.45	0.03	0	0.05	0	0	0
BnaA02G0047700ZS	7.32	6.76	3.96	4	4.24	4.77	4.69	8.59	4.08	5.58	8.02	7.73	6.61	7.58	7.68	1.93	8.9	6.3	8.84	5.63	5.99	9.48	8.01
BnaA10G0222200ZS	6.66	6.92	5.27	5.4	5.77	7.14	7.78	8.04	3.2	4.18	7.23	5.53	8.58	9.03	8.76	2.01	6.71	3.49	4.33	5.14	4.75	7.43	7.04
BnaC02G0055100ZS	8.99	6.86	4.4	4.24	4.59	5.32	4.83	5.99	3.44	5.55	8.63	8.1	7.78	8.49	8.49	1.33	8.24	4.26	5.62	5.89	5.9	8.38	8.45
BnaC09G0527000ZS	10.5	9.49	6.83	6.86	7.47	8.38	8	8.61	4.68	5.11	11.65	11.01	8.49	10.72	10.83	5.09	9.68	5	6.15	5.75	5.49	7.12	6.55
BnaA03G0053800ZS	7.32	7.67	3.35	3.16	3.61	3.32	3.66	3.66	2.38	4.18	9.79	4.76	2.17	3.91	2.18	1.51	7.64	3.61	4.51	5.62	4.56	4.77	5.59
BnaC03G0061800ZS	13.03	10.68	5.6	5.06	5.33	6.07	5.19	5.66	3.42	4.83	16.81	8.86	5.38	8.21	3.79	1.34	10.56	8.62	7.1	8.94	8.06	9.63	11.29
BnaA10G0220700ZS	0.02	0.03	0.08	0.05	0.02	0.04	0.02	0.11	0.01	0	0.03	0	0	0	0	0	0.21	0.04	0	0.02	0.04	0.11	0.03
BnaC09G0525400ZS	0	0	0	0	0	0	0	0	0	0	0	0	0	0	0	0.08	0	0	0	0	0	0	0
BnaA10G0219200ZS	1.78	0.87	0.11	0.07	0.17	0.23	0	0.14	0.68	0.48	9.93	3.9	1.22	1.54	3.18	0.08	6.48	2.1	2.21	0.76	0.32	0.42	2.2
BnaC09G0523100ZS	1.22	0.36	0.19	0.03	0.07	0.08	0.14	0.04	0.48	0.61	8.48	2.49	0.71	0.8	3.29	0.09	5.78	1.06	1.57	0.91	0.68	0.68	1.71
BnaA02G0051500ZS	0	0	0	0	0	0	0	0.03	0	0	0.03	7.3	0.06	0.02	0.01	0.35	0	0	0	0	0	0	0
BnaA10G0218100ZS	2.55	2.83	3.89	3.77	3.76	3.8	3.77	1.74	1.75	1.17	2.65	15.1	0.17	0.13	0.07	0.87	3.91	1.38	1.87	1.4	0.93	0.3	0.3
BnaC02G0059200ZS	0	0	0.38	0.32	0.34	0.35	0.35	0.71	0.03	0	0.09	12.15	0.54	0.14	0.23	4.22	0	0	0	0.01	0.01	0.03	0
BnaC03G0064600ZS	0	0	0.01	0.04	0.02	0.04	0	0.01	0	0	0.34	14.09	0.61	0.28	0.08	5.6	0.03	0	0	0	0	0	0.01
BnaC09G0521800ZS	1.55	0.87	0.17	0.12	0.06	0.15	0.09	0.08	0.24	0.18	2.29	14.82	0.4	0.27	0.41	1.36	4.26	2.87	4.59	0.33	0.32	0.53	1.75
BnaA03G0056500ZS	0	0	0	0	0	0	0	0	0	0	0.02	0	0	0	0	0	0	0.09	0	0.58	0.47	0	0
BnaC03G0064800ZS	0	0	0	0	0	0	0	0	0	0	0	0	0	0	0	0	0	0.04	0.06	0.44	0.06	0.12	0
BnaA02G0052000ZS	0.09	0.06	0.18	0.27	0.24	0.36	0.45	0.15	0	0.1	0.07	0.46	0	0.61	1.27	0	0.08	0.09	0.24	0.08	0.05	0.06	0
BnaC02G0059700ZS	0.66	0.2	0.57	0.82	1.02	0.3	0.37	0.48	0	0	0.04	0	0	0	0.09	0	0	0	0	0	0	0.36	0
BnaC03G0065400ZS	0.05	0.05	0	0	0	0	0	0	0	0.05	0.4	0.05	0	0	0	0	0	0	0	0	0	0	0
BnaA03G0057000ZS	0.24	0.23	0.08	0	0	0	0	0.04	0.13	0.16	0.43	0.04	0	0.1	0.57	0	0	0.61	0.44	0.45	0.04	0	0
BnaA10G0216300ZS	3.98	2.99	2.46	2.53	2.63	1.69	1.4	1.01	3.51	4.49	7.72	4.57	2.05	1.74	3.34	0.16	9.62	3.76	4.11	4.39	2.72	2.56	2.33
BnaC09G0519900ZS	6.31	5.37	3.64	3.11	3.45	1.84	1.51	1.01	4.19	4.11	10.5	5.67	0.51	0.48	1.26	0.05	9.8	6.05	4.56	6.17	3.63	2.08	1.17
BnaC03G0067000ZS	19.12	43.35	140.24	137.55	136.44	115.71	106.69	76.82	309.05	273.82	26.63	11.68	13.2	7.99	5.54	0.18	70.63	102.55	82.64	83.71	74.59	55.61	31.03
BnaC09G0519200ZS	33.21	37.77	91.28	88.01	85.51	60.51	60.64	51.3	175.1	116.4	64.09	42.59	22.2	18.89	12.85	0.21	119.44	73.09	81.34	81	58.5	34.59	15.31
BnaA10G0215200ZS	0.5	0.26	0.11	0.2	0.08	0.13	0.16	0.42	0.2	0.14	0.73	1200.2	14.26	6.18	2.97	200.13	1.43	0.42	0.66	0	0	0.1	0.04
BnaC09G0518300ZS	1.03	0.79	0.35	0.61	0.29	0.24	0.19	0.48	0.32	0.3	0.92	1018.31	20.06	8.26	5.12	386.61	0.41	0.36	0.98	0.74	0.46	0.23	0.36
BnaA02G0054000ZS	7.68	5.29	4.28	4.69	4.76	4.87	5.8	6.84	4.04	3.43	9.31	4.98	2.53	2.62	2.48	0.87	5.93	3.09	4.56	4.79	6.33	5.68	4.39
BnaC02G0062900ZS	8.04	4.54	2.97	3.44	3.41	4.38	4.61	3.86	2.2	3.04	7.84	3.83	4.9	6	3.57	0.57	5.72	2.52	2.49	5.19	6.09	5.32	3.32
BnaC06G0224200ZS	0	0	0	0	0	0	0	0	0	0	0	0	0	0	0	0	0	0	0	0	0	0	0
BnaA02G0055700ZS	10.08	7.25	4.76	3.94	3.93	4.72	4.31	4.15	3.94	3.62	8.41	5.99	3.77	4.45	3.38	1.09	12.25	5.46	5.6	6.54	7.21	7.92	9.11
BnaC02G0065300ZS	10.31	7.36	3.98	3.48	4.21	3.67	3.1	3.57	3.61	4.62	19.34	7.39	8.04	8.55	8.27	2.67	10.89	4.74	5.92	8.23	7.61	8.68	11.83
BnaC09G0514200ZS	0	0	0.01	0.03	0.01	0.01	0.01	0	0	0	0.28	11.72	0.98	0.33	0.19	17.36	0.01	0	0	0	0	0	0
BnaA04G0079400ZS	0	0	0	0	0	0	0	0	0	0	0	0	0	0	0	0	0	0	0	0	0	0	0
BnaA10G0211600ZS	0	0.35	0	0	0.04	0	0	0	0	0.03	0.76	4.75	0.34	0.11	0	3.46	3.41	0.56	0.52	0.24	0.08	0	0
BnaA03G0061900ZS	0	0.07	0.05	0	0	0	0	0	0.24	2.5	0.51	0.02	0.12	0.05	0.75	0	46.59	0.58	0	0.06	0	0	0
BnaC03G0071200ZS	0	0.03	0	0	0	0	0	0	0.36	4.61	2.2	0.42	0.11	0	0.43	0	48.88	0.75	0.46	0	0	0	0
BnaA02G0061000ZS	0.12	2.98	10.93	9.59	10.44	11.63	12.53	12.27	13.33	23.39	7.68	2.74	6.66	0.02	0.02	1.89	9.31	3.75	1.86	1.45	0.5	1.36	0.45
BnaC02G0070800ZS	0	0.28	2.3	1.81	2.34	1.78	1.31	0.55	15.06	27.02	3.82	2.09	0.84	0	0	0.24	5.86	0.93	0.32	0.06	0.04	0.02	0
BnaC03G0075900ZS	0	0.04	0.29	0.5	0.62	0.16	0.11	0.52	0	0.02	25.82	41.32	82.8	77.38	68.97	4.55	45.24	39.54	49.4	61.55	68.96	58.89	30.68
BnaA10G0206200ZS	0.07	0	1.36	1.85	2.23	1.45	0.92	0.49	0.02	0.17	0.15	0.28	0.02	0	0	0	0.12	0.1	0.24	0.36	0.36	0	0
BnaC09G0505500ZS	0.63	0.41	3.17	3.17	3.95	3.22	4.28	2.11	0.71	0.58	0.36	1.07	0.06	0	0.02	0	1.15	2.16	3.5	7.74	8.24	2.53	0.08
BnaA10G0204800ZS	0.03	0.03	0	0.1	0.06	0.13	0.09	0.08	0.01	0	0	0.96	0.08	0.09	0.06	2.13	0.02	0	0.15	0	0	0.01	0.02
BnaC09G0503800ZS	0	0	0.01	0.06	0	0	0	0	0	0.02	0.01	2.27	0.47	0.21	0.06	4.93	0.02	0	0	0.02	0	0.01	0
BnaA10G0202300ZS	11.88	7.85	4.54	4.86	5.29	5.24	4.58	4.81	5.14	7.21	14.61	7.01	4.55	4.93	5.05	0.88	14.5	13.12	8.58	10.4	13.72	11.51	7.69
BnaC09G0500700ZS	13.51	8.85	5.29	5.17	6.3	6.66	6.3	6.96	5.17	7.36	16.72	9.26	8.6	10.91	9.49	0.96	17.5	11.03	10.14	10.37	12.65	13.6	11.12
BnaA02G0064200ZS	0	0.02	0	0	0	0	0	0	0	0	0.01	0	0	0	0	0	0	0	0	0	0	0	0
BnaA03G0069800ZS	0	0	0	0.06	0	0	0	0	0	0.02	0	0	0	0	0	0	0	0.02	0	0	0.17	0	0.04
BnaC02G0074200ZS	0	0	0	0.21	0.06	0.05	0.06	0.14	0	0	0	0	0.13	0.03	0.03	0	0	0	0.02	0	0	0.02	0
BnaC03G0079000ZS	0	0	0.08	0.08	0.06	0.03	0.08	0.04	0.01	0.06	0	0.47	0.11	0.06	0.09	0.37	0.02	0.06	0	0.07	0.09	0.19	0.11
BnaA02G0064600ZS	18.76	21.31	0.68	0.43	0.39	0.41	0.13	0	0.79	1.84	0.75	0.37	0	0	0.09	0	2.52	1.39	8.23	10.88	7.75	0.05	0
BnaA10G0201500ZS	5.9	3.91	1.88	1.23	1.39	0.62	0.13	0	1.52	3.48	4.23	3.53	0	0	0	0.78	4.26	2.48	1.97	3.84	3.97	0.87	0
BnaC02G0074500ZS	1.59	1.74	0.44	0.29	0.59	0.17	0.05	0	0.38	1.39	0.37	3.59	0.53	0.7	0.66	0	1.38	0.37	0.49	1.49	1.03	0	0
BnaC09G0499800ZS	6.45	10.77	1.47	1.36	1.54	0.44	0.32	0	1.79	3.49	1.95	2.55	0	0	0	0.62	4.08	2.04	2.11	5.55	10.54	1.08	0
BnaA03G0070000ZS	0	0	0.03	0.14	0.07	0.06	0.15	0.16	0	0	0.01	37.59	11.67	4.1	2.64	132.69	0.09	0	0	0	0	0.01	0.01
BnaA10G0201400ZS	0	0	0.19	0.29	0.13	0.34	0.21	0.22	0.08	0.05	0.05	28.91	10.63	3.9	1.97	129.57	0.11	0.01	0	0	0.01	0	0
BnaC03G0079200ZS	0.01	0	0.06	0.09	0.13	0.07	0.07	0.1	0.02	0	0.84	40.46	2.09	0.76	0.48	132.05	0.12	0	0	0	0	0.01	0
BnaC09G0499700ZS	0.05	0.04	0.61	0.65	0.48	0.4	0.46	0.32	0.68	0.28	0.01	44.11	11.18	4.01	2.65	184.42	0.15	0.01	0	0	0.02	0.01	0.01
BnaA03G0070300ZS	0	0.51	1.85	1.62	1.82	2.52	1.61	0.25	0	0	0.8	0.53	0.68	1.05	0.33	0	2.02	2.27	1.08	2.16	8.24	0.56	0
BnaC03G0079500ZS	0.07	19.08	10.39	11.3	11.78	19.08	9.34	5.43	0	0	1.48	0.88	5.88	5.99	1.43	0	3.4	4.68	3.27	11.3	30.63	18.63	0.47
BnaA02G0064900ZS	0.52	2.6	2.11	1.49	1.6	1.52	2.03	2.49	0.86	1.45	1.38	1.13	4.94	11.77	21.93	0.25	2.45	1.64	2.27	1.89	1.19	2.9	5.65
BnaA03G0070500ZS	8.43	9.86	4.02	3.97	3.63	3.55	4.26	3.28	3.32	4.41	5.93	2.29	13.97	12.81	10.46	0.05	4.88	3.36	5.47	4.88	2.83	5.05	3.2
BnaA10G0201000ZS	8.84	15.07	3.31	2.91	2.19	3.22	2.98	1.93	2.5	3.54	3.83	7.04	8.28	8.04	11.46	7.21	7.58	10.89	11.01	12.05	9.09	7.17	3.64
BnaC02G0074800ZS	4.08	6.4	5.87	4.83	4.91	4.22	4.79	3.05	3.23	4.25	3.19	5.35	3.93	4.28	2.77	0.28	4.66	5.14	5.03	3.88	2.45	3.49	3.49
BnaC03G0079700ZS	7.75	5.37	6.64	5.92	6.68	5.28	6.12	4.09	7.46	7.5	12.87	4.84	11.71	7.69	10.04	0.32	9.92	4.84	4.66	4.59	2.73	4.19	2.26
BnaA10G0199700ZS	5.22	3.58	7.76	7.9	7.98	6.15	7.58	9.39	15.25	12.73	13.69	1.54	5.78	4.47	2.69	0	12.69	7.32	12.76	10.91	6.87	7.8	3.32
BnaC09G0496300ZS	7.34	8.92	25.28	25.36	23.37	16.1	14.79	15.27	35.72	27.21	12.16	6.5	6.96	3.63	2.77	0.46	31.06	41.87	27.64	30.31	25.77	24.11	8.84
BnaA10G0199000ZS	27.62	21.26	14.88	14.6	15.88	18.71	19.39	24.57	9.6	11.21	21.68	16.1	18.63	22.08	18.71	11.59	16.63	13.66	17.24	16.29	14.33	18.28	25.08
BnaC09G0495400ZS	27.36	21.77	15.22	15.37	14.84	19.59	20.15	22.92	7.73	10.38	17.67	14.96	21.67	27.56	24.58	13.4	17.28	15.17	17.01	20.27	14.61	19.81	25.25
BnaA02G0070200ZS	0	0	0	0	0	0	0	0	0	0	0	92.85	0.78	0	0.13	6.36	0	0.04	0	0	0	0	0
BnaC02G0081100ZS	0	0	0	0	0	0	0	0	0	0	0.25	213.96	3.47	1.28	0.85	55.41	0	0	0	0	0	0	0.09
BnaA10G0192600ZS	10.5	7.71	13.7	16.35	13.81	12.02	13.03	18.5	38.84	33.24	16.67	12.81	6.48	5.31	4.45	0.5	28.94	83.63	43.31	28.45	42.95	28.27	26.9
BnaA02G0071400ZS	19.17	9.68	14.92	15.85	14.92	12.44	15.63	19.46	53.92	46.67	33.68	27.33	7.04	9.08	5.28	2.63	46.96	130.07	49.22	39.73	70.18	51.38	57.37
BnaC02G0082600ZS	18.63	13.82	17.14	18.98	17.21	17.94	21.23	32.84	44.03	40.76	32.61	31.15	20.15	23.35	13.26	12.43	26.87	29.94	38.16	31.02	39.48	30.13	28.42
BnaC09G0487800ZS	8.6	6.45	10.44	11.17	10.57	8.96	11.39	14.04	34.86	25.89	12.6	8.72	7.32	4.89	3.31	0.27	24.4	54.13	34.89	23.55	35.23	26.15	22.15
BnaC09G0484700ZS	0	0	0	0	0	0	0	0.05	0.15	0.44	16.5	15.26	1.38	0.95	6.97	0.18	17.76	0	0	0	0	0	0.88
BnaA01G0404500ZS	13.33	11	7.01	6.66	6.92	8.09	9.13	12.72	5.01	6.91	15.47	15.65	22.35	23.4	29.84	4.74	17.14	10.82	15.66	14.75	14.23	16.19	19.49
BnaA03G0077100ZS	21.21	14.32	4.37	4.03	4.3	5.04	3.73	4.72	5.18	11.66	7.86	11.3	9.3	7.86	11.98	0.41	18.75	13.88	14.63	14.34	12.71	4.87	4.99
BnaA10G0188900ZS	11.93	7.61	2.57	2.09	2.5	2.61	1.93	2.83	4.94	10.77	10.36	9.59	7.01	4.99	7.08	0.44	18.05	9.22	13.22	8.3	5.92	3.09	5.2
BnaC01G0510800ZS	19.04	14.68	11.25	11.21	11.19	10.66	9.97	12.11	7.16	10.16	21.45	16.68	30.07	40.51	34.07	3.96	19.93	11.76	17.59	14.53	12.5	13.82	17.16
BnaC03G0088100ZS	13.85	10.25	2.96	2.87	2.9	2.87	2.03	3.25	4.32	8.3	5.92	7.81	3.46	3.01	4.16	0.36	13.52	9.33	10.08	8.88	8.26	3.48	4.08
BnaC09G0482700ZS	12.02	8.31	1.93	2.32	2.27	2.21	1.88	2.83	3.86	8.13	9	8.6	4.26	2.79	4.49	0.34	15.32	8.31	10.13	6.92	6.15	3.3	3.45
BnaA01G0403400ZS	11.99	8.82	5.11	5.34	5.92	8.06	7.41	7.61	5.24	8.64	6.95	5.73	5.45	4.33	5.49	0.32	6.43	3.83	6.01	6.76	5.44	7.66	6.57
BnaC01G0511900ZS	9.5	6.69	3.92	4.12	3.86	5.75	5.52	6	4.1	5.74	5.55	3.69	4.97	6.51	3.87	0.15	5.75	3.25	3.4	4.5	4.01	4.87	4.91
BnaA02G0075000ZS	0	0	0	0	0	0	0	0	0	0	0.03	0	0	0	0	0	0	0	0	0	0	0	0
BnaA03G0078600ZS	0	0	0	0	0	0	0	0	0	0.01	0	0	0.05	0.11	0.33	0	0.31	0	0	0	0	0	0
BnaC02G0088500ZS	0	0.02	0	0	0	0	0	0	0	0	0.1	0	0	0	0	0	0	0	0	0	0	0	0
BnaC03G0089700ZS	0	0	0	0	0	0	0	0	0	0	0	0	0	0.11	0.17	0	0	0	0	0	0	0	0
BnaA10G0186900ZS	0	0	0	0	0	0	0	0	0	0	0.06	0	0	0	0	0	0	0	0	0	0	0	0
BnaA02G0075100ZS	5.86	4.81	6.66	6.96	7.28	6.89	7.62	9.6	14.66	15.46	9.02	4.79	4.92	4.54	2.13	0.24	13.25	8.35	13.22	8.24	5.35	6.19	2.8
BnaC02G0088600ZS	3.73	3.45	5.72	5.19	5.87	6.66	8.96	10.98	11.04	12.31	7.94	3.81	4.41	5.06	1.63	0.1	7.45	7.59	10.08	8.21	6.3	8.79	3.43
BnaC02G0089800ZS	2.52	2.46	1.89	2.08	2.04	2.39	2.65	2.75	1.2	1.69	6.67	1.77	0.97	2.53	0.21	0.22	3.42	2.07	2.52	3.48	3.01	2.39	1.19
BnaA10G0178900ZS	6.28	6.32	5.74	5.79	6.24	5.02	5.95	7.66	6.96	9.99	12.74	7.01	3.28	4.24	1.9	0.13	15.6	9.25	11.17	12.62	9.21	9.79	6.1
BnaC09G0467300ZS	5.71	4.77	4.57	4.46	4.74	4.81	4.12	5.58	8.25	10.14	12.04	6.44	4.9	5.23	2.15	0.12	12.85	6.72	7.92	8.73	5.61	5.36	4.43
BnaA02G0082100ZS	14.56	9.77	3.49	3.36	3.89	5.48	6.25	10.76	6.59	9.29	14.36	6.43	6.31	6.05	3.81	1.24	12.33	7.32	8.98	8.51	7.57	11.46	11.39
BnaA03G0084800ZS	16.3	13.35	9.24	9.89	10.32	13.83	13.72	13.01	11.63	15.6	9.54	11.36	16.9	18.69	17.33	22.86	11.89	10.22	13.48	15.31	12.66	20.58	21.31
BnaA10G0177500ZS	21.6	15.93	7.21	7.16	8.07	10.57	10.16	15.67	8.36	14.92	16.19	11.22	15.71	17.2	17.02	7.33	15.79	14.23	20.54	18.59	13.81	18.88	22.01
BnaC02G0097300ZS	17.25	11.74	5.72	6.56	6.17	7.85	8.61	13.39	10.3	14.08	13.32	9.16	8.18	7.7	5.85	4.79	12.18	10.95	13.05	12.63	10.02	16.3	15.74
BnaC03G0097200ZS	13.3	12.15	7.6	8.12	8.17	10.25	10.79	10.78	9.52	12.69	8.72	6.84	6.39	6.56	5.58	6.23	12.17	10.39	14.1	13.73	12.12	20.4	18.83
BnaA10G0174200ZS	10.98	8.51	6.3	6.56	8.35	11.42	12.83	15.19	5.07	5.42	6.57	7.63	8.47	8.03	5.78	10.86	6.75	4.68	6.47	8.1	7.3	11.9	13.9
BnaC03G0100600ZS	28.49	28.05	17.02	16.59	18.27	20.59	21.24	23.93	12.23	11.22	13.79	13.32	16.82	15.83	16.45	3.13	16.64	9.4	14.28	14.8	12.79	17.44	19.42
BnaC09G0461300ZS	10.68	8.13	6.54	5.94	7.44	10.03	11.96	13.99	5.38	5.49	5.94	6.98	12.15	11.32	8.7	9.74	6.25	4.85	7.75	6.57	5.57	11.57	12.74
BnaA02G0087200ZS	0	0	0	0	0	0	0	0	0	0.02	0.01	0	0	0	0.02	0	0	0.01	0	0.01	0	0.01	0.03
BnaA10G0171900ZS	0	0.04	0.03	0.06	0.07	0.07	0.18	0.07	0.12	0.09	0.06	12.42	1.68	0.85	0.48	24.87	0.01	0	0	0.01	0.02	0.01	0.15
BnaA03G0090600ZS	1.46	0.56	0.34	0.21	0.25	0.18	0.27	0.02	0.26	0.39	1.69	1.3	0.24	0.43	0.09	1.33	1.66	0.12	0.29	0.22	0.08	0.01	0.02
BnaA10G0171000ZS	1.52	1.32	0.7	0.63	0.58	0.56	0.39	0.2	0.86	1	2.57	1.03	0.36	0.31	0.2	0.11	3.52	0.58	0.42	0.79	0.59	0.2	0.02
BnaC03G0102800ZS	0.38	0.37	0.45	0.37	0.42	0.2	0.28	0.16	0.35	0.25	1.3	0.56	0.08	0	0	0.13	1.18	0.1	0.1	0.23	0	0	0
BnaC09G0456900ZS	0.97	1.31	0.08	0.05	0.1	0.08	0.1	0.18	0.45	0.68	2.1	0.67	0.07	0.04	0.04	0.01	2.26	0.62	0.49	0.64	0.39	0.07	0.07
BnaC09G0455100ZS	17.49	1.65	0	0	0	0	0	0	0	0.02	0.01	0	0	0	0.01	0.01	0.89	0	0	0	0	0	0.12
BnaC02G0108000ZS	7.39	13.2	3.55	3.61	3.7	6.2	8.25	13.05	2.38	4.76	3.25	28.38	28.05	16.4	11.53	89.2	10.19	24.34	30.85	13.38	11.11	32.04	30.83
BnaC08G0467200ZS	0	0	0	0	0	0	0	0	0	0	0.3	0	0	0	0	0	0	0	0	0	0	0	0
BnaA10G0165700ZS	0.06	0.03	0	0	0.02	0	0.03	0.29	0	0	48.05	0	0	0.02	0.14	0	0	0	0.02	0	0.03	0.06	0.26
BnaC09G0449500ZS	0.01	0.02	0	0.01	0	0.06	0.13	0.78	0	0	47.18	0	1.28	3.44	6.05	0	0	0	0.01	0	0.03	0.03	0.42
BnaA02G0091000ZS	7.8	4.69	1.66	1.78	1.99	3.55	2.75	2.11	1.43	4.4	1.26	3	0	0.04	0.03	0.04	3.61	14.35	6.19	2.89	18.76	14.75	12.32
BnaC02G0109600ZS	0.03	0	0	0	0	0	0	0	0	0.04	0.05	0.18	0	0	0	0	0	0	0	0.04	0	0.04	0
BnaA03G0094500ZS	0.25	0.6	0.04	0.11	0.02	0.09	0.04	0.07	0	0.3	0.06	0.09	0.07	0	0.07	0	0.12	0.05	0	0.04	0.02	0.07	0
BnaC03G0106900ZS	1.44	0.78	0.02	0	0.06	0.12	0.41	0.61	0.09	0.47	0.12	0.11	0.01	0.04	0.02	0	0.22	0.13	0.1	1.01	0.5	1.75	0.76
BnaA10G0162900ZS	41.78	23.63	8.33	8.26	9.8	9.67	9.04	11.36	11.76	17.21	95.94	17.85	3.63	8.03	1.7	0.23	32.03	21.24	22.2	24.68	28.57	15.11	14.24
BnaC09G0446000ZS	41.34	22.21	8.89	8.45	9.07	9.9	11.31	15.35	16.1	11.77	66.32	14.32	5.73	8.7	2.71	0.48	32.16	14.95	18.67	19.26	20.5	14.22	20.51
BnaA03G0402700ZS	11.41	9.93	6.64	6.68	6.55	8.77	9.79	9.68	3.12	3.55	6.19	6.72	6.68	8.94	6.51	7.28	6.44	4.37	5.03	6.85	4.88	6.72	10.87
BnaC07G0374400ZS	7.82	7.49	4.82	4.93	5.55	6.84	7.01	7.46	2.71	3.13	5.58	4.98	8.41	12.01	8.51	4.49	5.18	4.13	4.27	5.57	4.38	5.75	7
BnaA03G0402100ZS	0	0	0	0	0	0	0.03	0.06	0	0	0.23	2.33	0	0	0	0	38.24	0	0	0.03	0	0.03	0
BnaA09G0073100ZS	0	0	0	0	0	0	0	0	0	0	0.17	1.22	0	0	0	0	25.59	0	0	0	0	0	0
BnaA02G0389900ZS	0	0	0.03	0	0	0	0	0	0	0	0.04	0.81	0	0	0	0	29.5	0	0	0	0	0	0
BnaC02G0521400ZS	0	0	0	0	0	0	0	0	0	0	0	1.16	0.02	0.06	0.06	0	17.14	0	0	0	0	0	2.4
BnaC07G0373800ZS	0	0	0	0	0	0	0	0	0	0	0.52	2.89	0	0	0	0	42.35	0	0	0	0.03	0	0
BnaC09G0063100ZS	0	0	0	0	0	0	0	0	0	0	0.04	1.18	0	0	0	0	29.4	0	0	0	0	0	0
BnaC02G0519900ZS	22.65	17.25	10.73	11.06	12.76	14.62	15.1	19.34	9.68	13.77	22.61	16.27	14.36	15.07	13.78	3.55	22.95	11.43	16.34	18.57	15.78	22.6	35.34
BnaA09G0071100ZS	2.47	3.05	9.52	8.8	7.92	5.98	6.86	7.09	23.29	9.74	10.18	12.8	1.96	3.74	3.17	1.96	4.03	2.2	2.41	7.43	9.74	3.68	0.53
BnaC09G0060700ZS	2.4	2.91	7.54	7.59	5.84	4.43	3.64	2.64	17.53	5.8	8.45	9.61	0.55	1.74	1.98	3.45	5.22	4.1	2.55	7.2	9.45	1.39	0.05
BnaA06G0324100ZS	18.45	15.71	8.93	8.13	8.91	8.75	7.84	8.35	6.66	9.41	23.22	12.3	5.32	6.71	4.89	0.74	16.7	9.65	11.65	12.92	10.69	8.93	6.25
BnaC07G0370000ZS	18.53	12.61	5.34	5.17	6.34	4.95	3.38	3.73	4.27	7.22	24.89	10.59	2.61	2.88	2.49	0.82	20.57	9.48	10	12.38	9.9	6.28	5.57
BnaA03G0578700ZS	0	0	0.24	0.31	0.43	0.42	0.35	0.15	1.93	2.21	0.76	2.58	0	0	0.04	0	0.78	1.06	1.4	0.22	0.1	0	0
BnaC04G0231500ZS	0.02	0	0	0	0	0	0	0	0	0.03	0.03	0.91	0.02	0	0.11	1.8	0	0	0	0	0	0	0
BnaA06G0329000ZS	30.02	14.34	2.52	2.23	2.42	5.24	8.56	28.97	0.1	0.37	2.36	6.56	33.14	34.76	33.12	35.27	30.69	94.02	15.31	36.03	60.8	45.45	40.14
BnaC07G0364800ZS	29.96	9.8	2.94	2.99	3.7	6.61	8.75	21.8	0.08	0.26	3.84	4.78	23.58	28.24	23.86	11.45	31.55	21.92	10.25	38.25	41.02	32.04	35.3
BnaA07G0264500ZS	2.93	2.32	1.48	1.99	1.64	2.16	1.77	2.76	1.86	1.78	3.69	1.58	8.25	9.19	6.57	0.22	2.75	1.88	2.2	2.49	6.97	2.63	3.26
BnaC06G0296300ZS	7.96	6.97	1.68	1.48	1.65	1.75	1.78	1.44	1.81	2.3	3.89	2.24	1.93	3.04	2.16	0.11	4.48	3	3.25	4.17	3.62	2.78	2.02
BnaA06G0332400ZS	3.33	0.13	0.07	0.06	0.16	0.07	0.11	0.18	0.06	0.06	3.71	0.3	0	0	0	0	0	0.22	0.67	0.18	0.16	0.05	0
BnaC07G0362000ZS	2.87	0.12	0	0	0	0	0	0	0.03	0.04	13.93	0.85	0	0	0	0	1.76	0	0	0	0	0	0
BnaA05G0067300ZS	8.96	7.74	4.4	4.58	4.63	5.4	5.61	6.51	3.23	4.29	4.89	5.94	4.21	4.12	4.78	0.46	6.7	3.91	4.3	6.47	5.48	4.87	4.01
BnaC04G0075900ZS	10.28	7.34	4.11	4.32	4.27	5.67	5.41	7.02	3.02	4.47	5.28	5.98	6.27	6.71	7.07	1.59	6.95	4	5.22	6.85	6.48	6.57	6.42
BnaA06G0335400ZS	8.64	14.13	47.01	46.22	48.02	52.81	58.06	66.35	24.35	13.28	15.33	26.69	150.13	171.9	67.86	2.34	28.88	26.56	29.78	40.07	28.51	27.4	42.15
BnaC02G0511000ZS	7.48	5.59	7.49	9.57	7.88	10.75	14.34	16.53	9.27	23.84	5.47	6.02	48.63	48.87	31.23	12.36	8.61	25.07	32.53	37.26	33.98	33.09	49.72
BnaA09G0060800ZS	0	0	0	0	0	0	0	0	0	0	0	0	0	0	0	0	0	0	0	0	0	0	0
[truncated: 5,792 more rows]

## Sheet: expression_log10
	root	upper_stem_peel	middle_stem_peel	lower_stem_peel	leaf_1	leaf_13	leaf_23	sepal	petal	filament	pollen	bud_2mm	bud_4mm	silique_2DAF	silique_wall_24DAF	silique_wall_50DAF
BnaA10G0008800ZS	1.09	0.97	0.8	0.78	0.84	0.9	0.83	0.7	1.07	0.79	0.65	0.82	0.66	0.33	0.96	0.91
BnaC05G0010300ZS	1.14	0.99	0.88	0.86	0.89	1	0.86	0.75	1.11	0.68	0.66	0.8	0.66	0.19	0.85	0.86
BnaA09G0694500ZS	0	0	0	0	0	0	0	0	1.56	0	0	0	0	0	0	0
BnaC05G0008300ZS	0	0	0	0	0	0	0	0	2.49	1.18	0.08	0.04	0.05	0.73	0	0.01
BnaA09G0715900ZS	0	0.02	0	0	0	0	0	0	1.27	0	0	0	0.01	0	0	0
BnaA10G0005200ZS	0	0	0	0	0	0	0	0	0.32	0.05	0.06	0.14	0	0	0	0
BnaC05G0007300ZS	0	0	0.08	0.05	0.08	0.1	0.09	0.07	0.43	0.38	0.04	0.03	0	0.11	0	0.01
BnaC03G0000500ZS	0.4	0.51	0.61	0.56	0.68	1.59	0.65	0.89	0.1	0.32	1.98	1.38	1.29	0.17	1.34	2.56
BnaA10G0005000ZS	0	0	0.01	0	0.09	0.07	0.09	0.14	0.05	0.01	1.18	0.65	0.81	0.05	0	0.44
BnaC05G0007100ZS	0	0	0.03	0.04	0.09	0.1	0.01	0	0.05	0.03	1.28	0.7	1.09	0.39	0.04	0.32
BnaA10G0004100ZS	0.72	1.07	1.02	0.95	0.95	0.87	0.71	0.7	1.7	2.26	0.44	0.51	0.28	0.34	1.81	0.11
BnaC05G0006000ZS	1.15	1.5	1.35	1.29	1.37	1.52	0.94	0.92	1.5	2.25	0.73	0.86	0.49	0.03	2.1	0.2
BnaA09G0695600ZS	0	0.02	0.03	0.03	0.04	0.03	0.06	0.04	1.36	2.12	0.04	0.05	0.11	0	0.03	0.02
BnaA10G0002600ZS	0.06	0.03	0.11	0.18	0.18	0.19	0.01	0	0.12	2.13	1.39	0.95	0.7	2.67	0.03	0
BnaC05G0004400ZS	0.04	0.81	0.12	0.12	0.11	0.18	0.06	0.1	0.35	2.09	1.52	1.11	1.14	2.53	0.02	0
BnaA09G0718200ZS	1.36	1.18	1.04	1.07	1.1	1.18	1.02	0.74	0.89	2.13	1.44	1.14	0.96	2.69	0.79	1.03
BnaA10G0001200ZS	0.11	0.24	0	0	0	0	0.04	0.18	1.84	0.91	0.01	0.03	0	0.3	1.46	0
BnaC09G0203700ZS	0	0	0	0	0	0	0	0	0.01	0	0	0	0	0	0	0
BnaA09G0698500ZS	1.88	2.03	2.69	2.62	2.59	1.83	2.13	1.99	2.46	2.8	2.21	2.67	2.29	1.63	2.27	0.09
BnaC03G0001600ZS	0.38	0.32	0.35	0.26	0.4	0.44	0.29	0.32	0.28	0.3	0.35	0.41	0.28	0.21	0.28	0.36
BnaC09G0399500ZS	0	0	0	0	0	0	0	0	0	0	0	0	0	0	0	0
BnaA09G0691300ZS	0.82	0.74	0.59	0.58	0.68	0.76	0.63	0.61	0.75	0.74	1.02	1.12	1.16	0.57	0.84	1.06
BnaA10G0012600ZS	0	0	0	0	0	0	0	0	0	0	0	0	0	0	0	0
BnaC05G0014600ZS	0	0	0	0	0	0	0	0	0.01	0	0	0	0	0	0	0
BnaC05G0017900ZS	0	0.01	0.04	0.08	0.04	0.09	0	0	0.05	1.87	1.02	0.68	0.54	2.25	0	0.06
BnaA10G0016800ZS	0.33	0.65	0	0.01	0	0	0.34	0.07	0.95	0.92	0	0	0	0.15	1.14	0.17
BnaC05G0018700ZS	0.18	0.19	0.34	0.24	0.21	0.15	0.29	0.03	0.96	1.42	0	0	0	0.4	0.84	0.11
BnaA10G0018700ZS	0.7	0.79	0.3	0.17	0.15	0.11	0.81	0.61	1.04	1.17	0.05	0.08	0.07	0.03	0.24	0.02
BnaC05G0020900ZS	0.76	0.89	0.48	0.39	0.42	0.21	0.94	0.79	1.14	1.02	0.12	0.11	0.09	0	0.48	0.17
BnaA09G0687800ZS	0.34	0.22	0.27	0.21	0.28	0.37	0.43	0.31	0.07	0	0.11	0.05	0	0.02	0.09	0.08
BnaA08G0315300ZS	1.61	1.45	1.59	1.59	1.63	1.84	0.93	1.31	1.2	1.35	1.65	1.6	1.67	1.37	1.22	1.48
BnaC05G0027100ZS	1.47	1.36	1.72	1.75	1.73	1.88	1.54	1.68	1.07	1.04	1.05	1.24	1.04	1.21	1.41	1.55
BnaC08G0010400ZS	1.82	1.67	2.09	2.12	2.17	2.43	1.27	1.61	1.47	1.58	1.95	1.88	1.94	1.77	1.48	1.9
BnaA08G0314900ZS	0	0	0	0	0.01	0	0	0	0	1.12	0.23	0.07	0.03	1.16	0	0
BnaA09G0683300ZS	0	0	0	0	0	0	0	0	0	0.68	0.05	0.09	0.01	0.56	0	0
BnaC08G0011000ZS	0.02	0	0	0	0	0	0	0	0.07	0.84	0.2	0.06	0.06	0.85	0	0
BnaA09G0682900ZS	0.48	0.6	0.18	0.23	0.16	0.18	0.31	0.39	0.49	0.25	0	0	0	0	0.45	0.05
BnaC05G0028500ZS	1.12	1.44	0.63	0.62	0.59	0.49	0.59	0.88	0.84	0.49	0.68	0.64	0.54	0	0.85	0.61
BnaA09G0704400ZS	0.56	0.7	0.28	0.32	0.33	0.53	0.65	0.57	0.64	0.26	0	0	0	0	0.65	0.52
BnaA09G0703400ZS	0	0	0.01	0.03	0.01	0.03	0.01	0.01	0.16	1.09	0.25	0.12	0.06	1.33	0	0
BnaA08G0312300ZS	0.68	0.57	0.4	0.36	0.38	0.38	0.37	0.46	0.61	0.48	0.29	0.36	0.26	0.11	0.44	0.36
BnaA10G0030900ZS	1.02	0.95	0.78	0.74	0.73	0.86	0.65	0.68	1	0.84	0.94	0.99	0.96	0.55	0.82	0.97
BnaC05G0032300ZS	1.09	1.02	0.94	0.95	0.94	1	0.83	0.86	1.08	1	1.12	1.21	1.15	0.7	0.97	1.01
BnaC08G0015400ZS	0.68	0.62	0.65	0.64	0.67	0.74	0.53	0.61	0.71	1.18	1.07	0.97	0.85	1.79	0.67	0.79
BnaA09G0701800ZS	0	0.45	0	0	0	0	0	0.01	0	0.01	0	0	0	0	0	0.06
BnaC05G0036800ZS	1.04	1.26	0.57	0.59	0.63	0.92	0.25	0.22	0.41	0.26	1.81	1.68	1.77	0.25	0.66	1.33
BnaC08G0513000ZS	0.01	0.41	0	0	0	0.03	0	0	0	0.05	0	0	0	0.02	0.01	0.14
BnaA08G0310600ZS	0.1	0.11	0.07	0.1	0.06	0.06	0.07	0.02	0.13	0.92	0.1	0.07	0.04	0.83	0.15	0.01
BnaA09G0679900ZS	0	0	0	0	0	0	0	0	0.48	1.22	0.15	0.05	0.02	0.86	0	0
BnaA10G0039200ZS	0.1	0.03	0.01	0.01	0	0.01	0.01	0.01	0.09	0.06	0	0	0	0	0.01	0
BnaC05G0040200ZS	0.04	0.08	0.01	0.01	0.01	0.02	0.02	0.04	0.37	0.18	0.03	0.07	0.05	0	0.01	0.04
BnaC08G0018700ZS	0.45	0.38	0.1	0.1	0.08	0.04	0.03	0.05	0.4	0.73	0.03	0.03	0.01	0.54	0.29	0.01
BnaA08G0308700ZS	2.08	1.96	1.83	1.81	1.8	1.68	1.24	1.07	1.14	0.79	0.99	0.93	1.13	0.04	1.62	1.62
BnaA09G0678200ZS	1.83	1.62	1.85	1.82	1.84	1.87	2.01	1.77	1.28	1.14	0.68	0.89	0.96	1.43	1.01	1.77
BnaA10G0041800ZS	1.69	1.74	1.88	1.9	1.89	1.85	1.85	1.45	1.6	1.29	1.88	1.84	1.79	1.13	1.38	1.7
BnaC08G0021600ZS	1.71	1.48	1.68	1.61	1.62	1.49	1.42	1.04	1.31	0.8	0.78	0.72	0.9	0.03	0.81	1.37
BnaA10G0043100ZS	0	0	0.21	0.23	0.25	0.14	0.04	0	1.65	0.05	0.01	0.03	0.01	0.16	0.01	0
BnaC05G0044300ZS	0	0	0.06	0.07	0.06	0.01	0	0.02	1.37	0	0	0	0	0	0.01	0
BnaA10G0044200ZS	0	0	0	0	0	0.02	0	0	1.73	0	0	0	0	0.01	0	0
BnaC05G0045100ZS	0	0	0	0	0	0	0	0	0.03	0	0	0	0	0	0	0
BnaA10G0046400ZS	0.02	0.04	0.02	0.03	0.04	0.06	0.08	0.08	0.21	0.68	0.1	0.16	0.09	0.08	0.48	0.01
BnaC05G0047100ZS	0.06	0.09	0.11	0.11	0.17	0.39	0.16	0.2	0.23	0.65	0.63	0.2	0.09	0	0.67	0.08
BnaA06G0045900ZS	2.53	2.53	1.99	1.99	2.03	2.07	1.83	2.3	2.5	2	2.37	2.41	2.3	1.09	2.59	2.87
BnaA09G0668700ZS	1.56	1.65	1.33	1.32	1.36	1.19	1.13	1.37	1.42	1.2	1.72	1.64	1.58	0.33	1.85	1.69
BnaA08G0301400ZS	0.01	0.06	0.05	0	0.08	0	0.05	0	0.1	0.11	0	0	0	0.08	0.42	0.29
BnaC05G0057800ZS	2.3	2.27	1.94	1.93	1.96	1.96	1.94	2.3	2.32	1.96	2.14	2.11	2.06	1.32	2.37	2.59
BnaC08G0032700ZS	0	0	0	0	0	0	0	0	0	0	0	0	0	0	0	0
BnaC08G0533800ZS	1.68	1.9	1.32	1.28	1.33	1.23	1.02	1.25	1.41	1.1	1.82	1.8	1.71	0.91	2.14	2.04
BnaA06G0051900ZS	0	0.01	0	0.01	0	0	0.01	0.05	0	0.07	0	0	0.02	0.16	0.03	0
BnaA09G0665200ZS	1.15	0.91	0.56	0.56	0.58	0.48	0.79	0.86	1.04	0.93	0.66	0.61	0.59	0.16	0.83	0.69
BnaC05G0064800ZS	0.01	0	0	0	0	0	0	0	0.01	0.03	0.05	0.01	0	0.04	0	0
BnaC08G0529800ZS	1.33	1.15	0.8	0.8	0.8	0.8	0.85	0.95	1.25	1.12	0.86	0.82	0.75	0.12	1	0.84
BnaA08G0298200ZS	1.12	0.82	0.52	0.48	0.54	0.55	0.55	0.49	0.66	0.72	0.59	0.75	0.7	0.18	0.68	0.73
BnaC08G0187500ZS	0.91	0.74	0.61	0.61	0.67	0.73	0.5	0.47	0.52	0.86	0.61	0.54	0.48	0.18	0.62	0.72
BnaA06G0052400ZS	1.43	1.32	0.92	0.91	0.91	0.89	0.68	0.91	1.23	1.15	0.88	0.99	0.98	0.35	1.28	0.99
BnaC05G0065200ZS	1.25	1.1	0.88	0.89	0.88	0.87	0.76	0.89	1.2	1.08	0.87	0.95	0.78	0.32	1.02	0.78
BnaA06G0059300ZS	0.86	0.72	0.37	0.29	0.37	0.4	0.54	0.64	1.13	0.67	0.21	0.26	0.26	0.19	0.67	0.55
BnaA08G0292900ZS	1.04	0.81	0.58	0.58	0.6	0.6	0.69	0.85	1.04	0.62	0.04	0.12	0.12	0.05	0.75	0.87
BnaC05G0074600ZS	0.91	0.76	0.58	0.56	0.61	0.57	0.68	0.81	1.02	0.7	0.33	0.45	0.27	0.05	0.72	0.41
BnaC08G0196000ZS	0.86	0.76	0.52	0.53	0.45	0.36	0.73	0.9	1.08	0.68	0.21	0.16	0.16	0.01	0.86	0.67
BnaA06G0059600ZS	1.07	0.99	0.81	0.82	0.83	0.97	0.7	0.79	0.93	0.89	1.02	1.1	1.01	0.68	0.84	0.97
BnaC05G0075000ZS	0.85	0.83	0.65	0.68	0.7	0.8	0.43	0.64	0.86	0.8	0.89	0.89	0.86	0.62	0.74	0.93
BnaC04G0337400ZS	0	0	0	0	0	0	0	0	0	0	0	0	0	0	0	0
BnaA08G0292300ZS	2.03	1.78	1.49	1.51	1.53	1.6	1.65	1.61	1.9	1.87	1.54	1.41	1.62	0.65	1.63	1.57
BnaC08G0196600ZS	1.98	1.82	1.53	1.54	1.58	1.65	1.63	1.54	1.87	1.96	2.12	1.96	2.05	0.82	1.64	1.73
BnaA06G0064200ZS	1.99	1.95	0.92	0.93	0.93	0.69	1.33	1.46	1.5	1.64	0.7	1.51	1.37	0.25	1.96	0.33
BnaC05G0079800ZS	1.85	1.9	0.95	0.77	0.86	0.49	1.47	1.56	1.51	1.2	1.23	1.89	1.76	0.26	1.92	0.08
BnaA06G0066700ZS	1.16	1.39	1.82	1.78	1.85	1.8	1.52	1.03	0.57	0.15	0.03	0.02	0.04	0.03	1.47	0.82
BnaA09G0657800ZS	1.73	1.49	1.34	1.32	1.37	1.09	1.39	0.99	0.85	1.18	0.65	0.64	0.34	1.16	1.47	0.91
BnaC05G0082300ZS	0.82	0.91	1.16	1.15	1.18	1.08	0.81	0.76	0.54	0.32	0	0.02	0.08	0.09	1.06	0.47
BnaC08G0202000ZS	1.77	1.34	1.41	1.44	1.45	1.13	1.75	1.37	0.76	0.8	0.04	0.13	0.01	0.14	1.06	0.76
BnaA06G0069600ZS	0.01	0	0.5	0.44	0.41	0.59	0	0	0.25	2.85	2.27	1.82	1.56	3.45	0	0.06
BnaC05G0086700ZS	0.07	0.03	0.32	0.36	0.36	0.41	0	0	0.21	2.63	2.02	1.56	1.3	3.25	0	0.16
BnaA09G0656100ZS	0.28	0.22	0.76	0.71	0.65	0.57	0.89	0.81	1.15	1.34	0.09	0.24	0.11	0.07	1.11	0.1
BnaC08G0515300ZS	0.42	0.3	0.63	0.6	0.6	0.43	0.77	0.63	0.93	1.11	0.05	0.08	0.03	0.08	0.56	0.05
BnaA06G0072200ZS	0.86	0.85	0.2	0.2	0.12	0.03	0.76	0.74	1.16	0.58	0.01	0.02	0.01	0.02	0.44	0
BnaA09G0653900ZS	0.68	0.64	0.03	0.04	0.05	0.01	0.19	0.42	0.81	0.52	0	0.05	0.16	0	0.15	0
BnaA09G0656700ZS	0.29	0.26	0	0.02	0	0	0.2	0.19	0.5	0.21	0	0	0.01	0	0.12	0
BnaC05G0089600ZS	1.26	1.17	0.46	0.52	0.43	0.28	0.76	0.79	1.31	0.82	0.01	0.01	0.04	0	0.67	0.13
BnaC08G0514400ZS	0.7	0.63	0.03	0.03	0.05	0.01	0.35	0.48	1.02	0.48	0	0.01	0	0	0.27	0
BnaA08G0284600ZS	0.75	1.43	1.92	1.89	1.92	2.1	1.03	0.93	0.61	0.42	1.27	0.05	0	0.01	1.81	1.85
BnaC08G0208600ZS	0.44	0.49	0.39	0.28	0.35	0.33	0.44	0.48	0.8	0.53	0.28	0.23	0.29	0.03	0.42	0.24
BnaC08G0211200ZS	0	0.04	0.02	0	0.02	0.01	0.1	0.02	0.03	0.02	0	0	0	0	0.03	0
BnaA06G0075600ZS	1.81	1.69	1.48	1.45	1.46	1.38	1.21	1.5	1.88	1.75	1.14	1.21	1.33	0.31	1.44	1.28
BnaA09G0651300ZS	0.83	0.64	0.83	0.85	0.85	0.74	1.14	1.04	1.02	0.78	0.6	0.67	0.37	0	0.95	0.78
BnaC08G0212700ZS	0.33	0.32	0.26	0.27	0.25	0.2	0.67	0.58	0.58	0.37	0	0.01	0	0	0.41	0.23
BnaA06G0085700ZS	0	0	0	0	0	0	0	0	0.02	0.02	0.37	0.12	0.65	0.03	0.23	0.58
BnaA09G0650000ZS	0	0	0	0	0	0	0	0	0.24	0.08	1.53	1.03	1.59	0.02	0.02	0.06
BnaC05G0105700ZS	0	0	0	0	0	0.06	0	0	0	0	0.45	0.06	0.42	0	0.05	0.11
BnaC08G0509300ZS	0	0	0	0	0	0.02	0	0	0.48	0.02	0.97	0.55	0.91	0.79	0	0
BnaC08G0509500ZS	0	0	0	0	0	0	0	0	0.02	0	0.79	0.5	1.06	0.04	0	0.02
BnaA06G0082700ZS	1.23	1.3	0.71	0.7	0.71	0.55	0.96	1.03	0.85	0.57	0.23	0.25	0.2	0	1.08	0.45
BnaC05G0102000ZS	1.19	1.3	0.73	0.68	0.7	0.57	0.92	1.02	0.89	0.65	0.17	0.22	0.18	0	1.05	0.65
BnaA09G0644100ZS	0.01	0	0	0	0	0	0	0	0.01	0.03	0	0	0	0	0	0
BnaC08G0502000ZS	0	0	0	0	0	0	0	0.01	0.09	0.03	0	0	0	0	0.02	0
BnaC05G0094100ZS	0.07	0.08	0.02	0.04	0.02	0.02	0.01	0	0.25	0	0	0	0	0	0	0
BnaA06G0088700ZS	0.01	0.28	0.78	0.76	0.82	0.55	0.14	0.59	0.74	0	0	0	0	0	0	0
BnaA09G0639400ZS	0.02	0	0.01	0	0	0	0	0.09	0.99	0	0	0	0	0	0	0
BnaC05G0109200ZS	0.45	0.01	0	0.01	0	0	0	0.35	0.75	0	0	0	0	0	0	0
BnaC08G0496800ZS	0.02	0.08	0.02	0.07	0.04	0.2	0.04	0.03	0.23	0.05	0	0	0	0	0.04	0.18
BnaA06G0090300ZS	0.94	0.87	0.54	0.55	0.57	0.56	0.64	0.81	0.87	0.72	0.69	0.71	0.74	0.32	0.71	0.78
BnaC05G0110900ZS	0.84	0.75	0.51	0.48	0.52	0.56	0.59	0.71	0.83	0.72	0.66	0.63	0.66	0.31	0.66	0.76
BnaA06G0094300ZS	0	0	0	0.02	0.01	0	0.38	0.35	0.66	0.42	0	0	0	0	0.03	0
BnaA09G0633400ZS	0.06	0.03	0.37	0.33	0.32	0.52	0.65	0.81	1.53	0.56	0.03	0.23	0.01	0	0.06	0
BnaC05G0115600ZS	0	0.02	0.05	0.03	0.04	0	0.46	0.47	0.89	0.69	0	0	0	0	0.01	0
BnaC08G0491200ZS	0.02	0	0.16	0.21	0.21	0.49	0.39	0.59	1.35	0.58	0.3	1.61	0.25	0	0.02	0.02
BnaA08G0270200ZS	1.63	1.59	0.9	0.89	0.83	0.73	0.96	1.24	1.35	1.47	1.21	1.17	1.37	0.25	1.49	0.99
BnaC08G0231300ZS	1.59	1.53	0.82	0.83	0.82	0.7	0.85	1.09	1.32	1.38	1.32	1.19	1.41	0.23	1.45	1
BnaA09G0628700ZS	0.63	0.25	0.38	0.34	0.33	0.31	0.68	0.69	0.6	0.92	0.37	0.43	0.46	0.36	0.11	0.39
BnaC08G0486300ZS	0.59	0.37	0.11	0.1	0.14	0.28	0.53	0.6	0.57	1.02	0.68	0.76	0.73	0.72	0.08	0.53
BnaA06G0103000ZS	0	0	0	0	0	0	0	0	1.24	1.58	0.06	0.03	0.06	0	0.02	0
BnaA08G0268600ZS	0.17	0.18	0.03	0	0	0	0	0.05	1.26	1.85	0.1	0.23	0.61	0.06	0	0
BnaC05G0127700ZS	0.66	1.2	0	0	0	0	0	0.09	1.11	1.99	0.08	0.02	0.15	0.66	0.01	0
BnaC08G0233100ZS	0	0.02	0	0	0	0	0	0	1.09	1.64	0.1	0.02	0.19	0.3	0	0
BnaC08G0485100ZS	0	0	0	0	0	0	0	0	1.07	1.73	0	0	0	0	0	0
BnaC05G0128500ZS	0.05	0.03	0.03	0	0.08	0	0	0	0.05	1.76	0.37	0.19	0.18	0.96	0.1	0.25
BnaC05G0129800ZS	0.44	0.39	0.25	0.32	0.37	0.55	0.23	0.21	0.41	0.38	1.15	0.59	0.68	0.35	0.76	1.08
BnaA07G0388500ZS	1.24	1.08	0.32	0.32	0.33	0.67	0.16	0.56	0.78	0.55	0.05	0.3	0.47	0.21	1.04	1.1
BnaC06G0456800ZS	1.36	1.29	0.64	0.71	0.71	1.03	0.32	0.78	0.96	0.85	1.36	1.47	1.69	0.64	1.31	1.41
BnaA06G0111800ZS	0.38	0.72	0.81	0.86	0.89	0.9	0.73	0.72	0.83	0.56	0.65	0.68	0.2	0.04	1.2	0.39
BnaC05G0137600ZS	0.3	0.47	0.74	0.72	0.77	0.75	0.79	0.6	0.9	0.52	0.3	0.6	0.43	0	0.58	0.06
BnaA06G0112500ZS	0.96	0.8	0.5	0.48	0.56	0.58	0.56	0.51	0.73	0.69	0.5	0.45	0.43	0.13	0.7	0.6
BnaA09G0621800ZS	0.84	0.66	0.48	0.53	0.55	0.66	0.44	0.38	0.71	0.71	0.51	0.59	0.58	0.16	0.65	0.57
BnaC08G0478100ZS	0.71	0.65	0.44	0.47	0.5	0.54	0.36	0.45	0.69	0.6	0.66	0.77	0.67	0.21	0.57	0.73
BnaC05G0148600ZS	0.03	0	0	0	0	0.01	0.01	0.02	0.05	0.01	0	0	0	0	0.01	0
BnaA06G0120800ZS	2.76	3.12	1.62	1.62	1.58	1.62	1.66	2.03	1.53	1.52	1.73	1.79	1.66	0.81	2.52	1.64
BnaA08G0260800ZS	2.38	2.7	0.94	0.93	0.82	1	1.36	1.74	0.55	0.38	1.37	1.32	1.25	0.22	2.24	1.6
BnaC08G0241200ZS	2.49	2.68	1.29	1.24	1.2	1.4	1.37	1.84	0.78	0.71	2	1.88	1.92	0.4	2.36	1.93
BnaA08G0260200ZS	1.04	0.94	0.69	0.63	0.66	0.79	0.56	0.67	0.97	0.81	0.71	0.75	0.77	0.45	0.76	0.83
BnaC03G0439000ZS	0.87	0.76	0.69	0.54	0.62	0.7	0.59	0.51	0.55	0.6	0.94	1	0.9	0.3	0.72	0.88
BnaC08G0241800ZS	1.06	0.94	0.75	0.73	0.82	0.9	0.63	0.67	0.91	0.98	1.02	1.02	1.01	1.02	0.88	1
BnaA09G0614000ZS	0.6	0.57	0.09	0.1	0.06	0.02	0.25	0.36	0.88	0.37	0.01	0.05	0.12	0	0.13	0
BnaC08G0469600ZS	0.74	0.71	0.12	0.09	0.11	0.01	0.29	0.34	0.97	0.43	0.04	0.03	0.1	0	0.12	0
BnaA06G0126600ZS	1.39	1.25	1.07	1.04	1.12	1.17	1.07	1.17	1.44	1.1	0.65	0.83	0.69	0.23	1.1	1.22
BnaA08G0257100ZS	0.76	0.64	0.4	0.33	0.4	0.33	0.57	0.42	1.03	0.62	0.15	0.17	0.08	0.04	0.61	0.29
BnaC05G0154800ZS	1.31	1.13	0.97	0.95	0.97	1.03	1.07	1.18	1.36	1.08	0.84	0.95	0.84	0.16	1.08	1.16
BnaC08G0245900ZS	0.83	0.77	0.49	0.5	0.55	0.57	0.57	0.61	1.04	0.74	0.5	0.48	0.41	0.05	0.67	0.78
BnaA06G0127500ZS	0	0	0	0	0	0	0	0	0	0.32	0.02	0.02	0.04	0.22	0	0
BnaC05G0155700ZS	0	0	0	0.03	0	0	0	0	0.03	0.37	0	0	0.02	0.24	0	0.01
BnaA06G0129000ZS	1.01	1.24	1.11	1.03	1.02	0.73	1.19	1.41	1.3	1.21	0.73	0.99	0.31	0.06	1.18	0.5
BnaA08G0255900ZS	1.14	1.1	0.8	0.75	0.73	0.38	1.04	1.21	1.23	0.84	0.1	0.07	0.1	0	0.89	0
BnaC05G0156700ZS	1.26	1.21	1.34	1.32	1.25	1.06	1.38	1.59	1.39	1.09	0.94	0.93	0.87	0.27	1.05	0.93
BnaC08G0247600ZS	0.93	0.89	0.7	0.66	0.61	0.25	0.73	1.08	1.02	0.64	0.04	0.01	0.01	0	0.69	0.05
BnaC05G0157500ZS	0	0	0	0	0	0	0	0	0	0	0	0	0	0	0	0
BnaA08G0252900ZS	0.63	0.59	0.35	0.24	0.51	0.98	0.6	0.95	0.9	2.07	1.1	0.71	0.98	0.19	1.43	1.08
BnaC08G0251600ZS	0.56	0.69	0.67	0.68	0.8	1.42	0.78	1.23	1.22	2.07	1.9	1.35	1.57	0.61	1.25	0.47
BnaA06G0139100ZS	0	0	0.02	0.02	0	0.03	0.03	0.07	0.47	0.4	0.1	0.07	0.12	0	0	0
BnaC07G0066400ZS	0	0	0	0	0	0	0	0	0	0	0	0	0	0	0	0
BnaC05G0167800ZS	0	0.09	0.32	0.31	0.31	0.5	0.4	0.25	0.59	0.47	0.33	0.04	0.33	0.01	0.08	0.32
BnaC07G0197400ZS	0.2	0.15	0.02	0	0.02	0.02	0.03	0.12	0.16	0.2	1.08	0.4	0.87	0	0.01	0.01
BnaA08G0248600ZS	1.9	1.82	1.51	1.54	1.51	1.61	1.3	1.49	1.64	1.71	1.82	1.91	1.94	1.48	1.72	1.7
BnaC08G0258200ZS	1.56	1.54	1.37	1.36	1.37	1.49	1.07	1.25	1.48	1.5	1.73	1.84	1.88	1.2	1.53	1.62
BnaA06G0142500ZS	1.96	1.74	1.57	1.55	1.57	1.6	1.49	1.6	1.72	1.96	1.96	2.06	2.14	1.07	1.99	1.74
BnaC07G0196100ZS	1.63	1.65	1.73	1.72	1.74	1.75	1.65	1.7	1.71	1.9	2.04	2.16	2.22	1.35	1.86	1.68
BnaA08G0242700ZS	0.43	0.48	0.24	0.18	0.2	0.27	0.33	0.32	0.9	0.56	0.15	0.05	0.05	0.03	0.27	0.33
BnaC08G0267800ZS	0.01	0.03	0.13	0.08	0.13	0.09	0.08	0.1	0.26	0.07	0.03	0.01	0.05	0	0.16	0.01
BnaA08G0240000ZS	0.04	0.04	0.01	0.03	0.03	0.05	0.06	0.03	0.06	1.2	0.22	0.11	0.03	0.97	0.03	0.04
BnaC08G0271400ZS	0.01	0	0	0	0	0.01	0.01	0	0.02	1.21	0.17	0.06	0.01	0.59	0	0
BnaA07G0236100ZS	0.11	0.03	0.03	0.06	0.07	0.07	0.03	0.03	0.05	0.01	0	0	0	0.03	0.08	0.07
BnaA07G0373100ZS	0.33	0.26	0.16	0.18	0.17	0.08	0.23	0.21	0.47	0.35	0.03	0.03	0.05	0.14	0.16	0.05
BnaC06G0256600ZS	0.54	0.37	0.26	0.21	0.28	0.32	0.11	0.18	0.39	0.28	0.26	0.16	0.13	0.06	0.55	0.5
BnaC06G0438700ZS	0.7	0.42	0.62	0.63	0.68	0.74	0.69	0.4	0.53	0.5	0.26	0.33	0.12	0.77	0.36	0.53
BnaA07G0121600ZS	0.13	0.05	0.02	0.03	0.03	0.01	0	0	0	0.03	0	0	0	0.26	0.02	0.08
BnaC07G0179000ZS	0	0	0	0	0	0	0	0	0	0	0	0	0	0	0	0
BnaA08G0238300ZS	0	0	0	0	0.01	0.01	0	0	0.49	0.61	0.08	0.02	0.05	0.8	0	0
BnaA09G0458700ZS	1.91	1.62	1.32	1.32	1.34	1.57	0.43	0.18	1.13	1.32	1.89	1.84	1.75	0.96	1.63	1.58
BnaC05G0198400ZS	2.09	1.73	1.36	1.37	1.39	1.61	0.54	0.24	1.17	1.35	1.91	1.83	1.74	0.73	1.54	1.55
BnaA07G0120300ZS	1.46	1.27	1.43	1.5	1.36	1.38	1.61	1.49	1.91	2.03	2.01	2.16	2.11	1.25	1.81	1.69
BnaA09G0458200ZS	1.8	1.71	1.7	1.71	1.69	1.7	1.72	1.77	2	2.07	2.32	2.38	2.42	1.02	1.86	1.88
BnaC05G0198900ZS	1.65	1.54	1.4	1.42	1.36	1.42	1.59	1.59	1.95	1.89	2.15	2.24	2.27	0.78	1.7	1.78
BnaC07G0177400ZS	1.53	1.33	1.37	1.41	1.37	1.35	1.59	1.48	1.9	2.02	2.13	2.34	2.23	1.32	1.84	1.78
BnaA09G0457000ZS	1.03	0.91	0.83	0.8	0.87	0.93	0.95	0.94	1.14	0.98	0.72	0.8	0.57	0.3	0.71	0.86
BnaC08G0274100ZS	1	0.8	0.62	0.59	0.62	0.68	0.53	0.55	1.08	0.78	0.64	0.84	0.55	0.16	0.66	0.7
BnaA08G0238100ZS	0.55	0.5	0.35	0.39	0.41	0.48	0.43	0.45	0.83	0.5	0.42	0.48	0.32	0.14	0.43	0.58
BnaA07G0119000ZS	0.55	1.01	0.3	0.27	0.22	0.2	0.47	0.91	0.74	0.87	0	0.02	0	0	0.93	0.03
BnaC07G0175800ZS	0.26	0.58	0.3	0.29	0.24	0.21	0.42	0.89	0.46	0.67	0	0.01	0.05	0	0.96	0.1
BnaA09G0454400ZS	1.77	1.75	1.57	1.57	1.6	1.65	1.45	1.52	1.6	1.56	1.66	1.71	1.72	1.6	1.56	1.63
BnaC08G0275400ZS	2	1.94	1.65	1.67	1.63	1.65	1.56	1.71	1.5	1.56	1.59	1.62	1.7	1.24	1.65	1.57
BnaC05G0204200ZS	1.73	1.77	1.65	1.63	1.63	1.65	1.62	1.74	1.44	1.55	1.7	1.72	1.75	1.57	1.62	1.59
BnaA07G0117200ZS	0	0	0	0	0	0	0	0	0.28	0.2	0	0	0	0	0	0
BnaA09G0452100ZS	0.03	0.02	0	0	0	0	0	0	0.27	0.27	0	0	0	0	0	0
BnaC05G0206300ZS	0	0	0	0	0	0	0	0	0.19	0.2	0	0	0	0	0	0
BnaC07G0173800ZS	0.01	0	0.01	0	0	0	0	0	0.42	0.36	0.03	0	0	0	0	0
BnaA07G0100900ZS	0	0.19	0	0.11	0.02	0.07	0	0.04	1.49	1.19	0.68	1.28	0.83	0.19	1.32	0.98
BnaC07G0152600ZS	0	0.1	0.18	0.12	0.17	0.38	0.01	0.11	1.62	1.65	0.86	1.25	0.72	0.34	1.59	0.59
BnaA07G0101500ZS	0.72	0.66	0.68	0.63	0.61	0.6	0.7	0.56	0.66	1.13	0.88	1.12	0.93	0.9	0.55	0.67
BnaC07G0153400ZS	0.55	0.51	0.64	0.64	0.64	0.52	0.88	0.71	0.61	0.71	0.68	0.89	0.79	0.63	0.45	0.52
BnaA07G0101800ZS	0.01	0.3	0.59	0.55	0.52	0.73	0.3	0.24	0.34	0.17	0.5	0	0	0.03	0.29	0.24
BnaC07G0153700ZS	0.02	0.23	0.42	0.45	0.36	0.49	0.32	0.3	0.25	0.12	0.57	0	0	0.05	0.37	0.32
BnaA07G0103000ZS	0	0.04	0.21	0.4	0.24	0.44	0	0	0.1	2.45	1.98	1.52	1.41	3.04	0	0.02
BnaC07G0154900ZS	0.04	0.04	0.2	0.31	0.16	0.33	0	0	0.08	2.41	1.96	1.5	1.29	3	0	0
BnaC03G0633800ZS	1.19	1.05	0.87	0.9	0.91	1.01	0.75	0.88	1.06	0.95	1.02	1.14	1.02	0.75	1.02	1.12
BnaA09G0436000ZS	1.27	1.16	0.95	0.96	1.01	1.05	0.96	1.07	1.39	1.07	1	1.12	0.92	0.59	1.13	1.13
BnaC05G0227200ZS	1.12	1.04	0.89	0.92	0.96	0.98	0.8	0.82	1.13	0.81	1.15	1.29	1.13	0.31	0.95	1.05
BnaA08G0227400ZS	1.02	1.12	1	0.98	1.01	0.98	0.69	0.85	1.21	1.03	0.85	0.86	0.9	0.58	1.1	1
BnaA09G0438500ZS	1.31	1.27	1.15	1.15	1.19	1.27	0.84	0.95	1.42	1.25	1.43	1.5	1.41	0.97	1.09	1.32
BnaC05G0225100ZS	1.39	1.34	1.25	1.26	1.29	1.4	0.91	1.04	1.39	1.25	1.53	1.57	1.51	1.23	1.14	1.48
BnaA08G0227500ZS	0.22	0.02	0.06	0.09	0.19	0.94	0.37	1.14	0.3	0.13	0.15	0.15	0.15	0.49	0.65	0.18
BnaA09G0438900ZS	0.47	0.2	0.09	0.12	0.11	0.74	0.79	1.63	0.51	0.92	0.75	1.09	1.27	1.52	0.54	0.65
BnaC05G0224800ZS	0.16	0.33	0.27	0.29	0.35	1.07	0.64	1.33	0.66	0.99	1.05	1.21	1.38	1.57	0.98	1.14
BnaC03G0630000ZS	0.28	0.16	0.27	0.24	0.33	0.91	0.68	1.49	0.39	0.41	0.05	0.16	0.12	0.84	0.62	0.62
BnaA07G0106800ZS	1.73	1.58	1.46	1.48	1.5	1.59	1.13	1.37	1.63	1.51	1.54	1.66	1.65	0.64	1.39	1.53
BnaA08G0228200ZS	1.89	1.79	1.71	1.73	1.74	1.78	1.48	1.62	1.85	1.75	1.66	1.8	1.72	0.98	1.55	1.59
BnaC07G0160900ZS	1.67	1.55	1.4	1.4	1.44	1.5	1.09	1.33	1.56	1.47	1.64	1.73	1.66	0.97	1.41	1.49
BnaC03G0629100ZS	1.99	1.86	1.85	1.83	1.87	1.9	1.66	1.76	1.9	1.81	1.77	1.96	1.89	1.17	1.61	1.64
BnaA08G0229400ZS	0	1.44	0	0	0.04	0	0	0	0.93	0.84	2.03	1.08	0.31	0	0.01	0
BnaC03G0627700ZS	0	1.23	0	0	0	0	0	0	0.78	0.71	1.21	0	0	0	0	0
BnaA09G0430400ZS	0.65	1.06	0	0	0	0.01	0.05	0.08	0.08	0.03	0	0	0.02	0	0.13	0
BnaC05G0234900ZS	0.87	1.48	0	0.02	0.04	0	0.09	0.04	0.06	0.15	0	0	0	0.03	0.2	0.05
BnaC03G0639000ZS	1.04	1.1	0.62	0.64	0.63	0.66	0.65	0.81	1.15	0.8	0.46	0.72	0.59	0.03	1.01	0.41
BnaA07G0095700ZS	0	0	0.12	0.09	0.06	0.08	0	0	0	1.71	1.06	0.65	0.46	2.24	0	0
BnaC07G0146100ZS	0.02	0	0.06	0.03	0.04	0.09	0	0	0.01	1.7	1	0.56	0.38	2.13	0	0
BnaA09G0424200ZS	1.89	1.91	0.37	0.33	0.18	0.1	0.78	1.14	2.35	1.52	0	0	0.12	0	0.44	0
BnaC07G0145900ZS	2.17	2.19	0.78	0.74	0.65	0.22	1.18	1.61	2.15	1.24	0.01	0.03	0	0	0.81	0
BnaA07G0092000ZS	0.02	0	0.14	0.06	0.13	0.06	0	0	0.05	2.4	1.22	0.83	0.65	2.56	0	0.03
BnaA08G0211000ZS	0.01	0	0.13	0.11	0.08	0.21	0	0	0.09	2.48	1.38	0.98	0.77	2.6	0.01	0.01
BnaC03G0654500ZS	0	0	0.06	0.14	0.08	0.08	0	0	0.51	2.53	1.45	1.06	0.86	2.68	0	0
BnaC05G0250200ZS	0.07	0	0.1	0.01	0.05	0.02	0	0.02	0.05	2.3	0.99	0.67	0.4	2.18	0	0
BnaC07G0141300ZS	0	0	0.03	0.05	0.09	0.08	0	0	0.05	2.13	1.06	0.67	0.47	2.31	0	0
BnaA08G0210700ZS	0.72	0.74	0.67	0.62	0.63	0.48	0.78	0.78	0.74	0.7	0.46	0.77	0.75	0.07	0.65	0.13
BnaC03G0655000ZS	0.49	0.53	0.89	0.84	0.79	0.61	0.92	0.87	0.9	0.61	0.26	0.45	0.56	0.04	0.6	0.02
BnaA09G0418300ZS	0.06	0.11	0.09	0.08	0.1	0.06	0.05	0.11	0.27	0.16	0.39	0.28	0.23	0.01	0.06	0.29
BnaC05G0251900ZS	0.12	0.12	0.05	0.08	0.03	0.05	0.03	0.12	0.32	0.1	0.01	0.06	0.03	0	0.03	0.04
BnaA08G0209600ZS	0.94	0.83	0.56	0.54	0.55	0.49	0.67	0.85	1.13	1.33	0.63	0.46	0.59	0.21	1.21	1.05
BnaA09G0417500ZS	0.19	0.09	0	0	0.03	0	0.26	0.26	0.19	0.34	0.05	0.02	0.03	0	0.19	0.01
BnaC03G0656400ZS	0.78	0.69	0.42	0.38	0.44	0.41	0.57	0.7	1.1	1.21	0.42	0.36	0.47	0.14	0.95	0.77
BnaC05G0252200ZS	0.23	0.21	0	0	0.03	0.05	0.16	0.38	0.28	0.29	0.05	0	0.02	0.07	0.59	0.31
BnaA07G0090700ZS	0.8	0.68	0.54	0.55	0.56	0.62	0.28	0.41	0.45	0.38	0.99	0.95	0.78	0.04	0.67	0.68
BnaC07G0140000ZS	0.8	0.76	0.52	0.56	0.57	0.68	0.35	0.31	0.69	0.53	1.23	1.29	1.08	0.02	0.98	1.1
BnaA08G0207900ZS	1.2	1.12	0.88	0.86	0.88	0.88	0.87	0.94	0.88	0.85	0.89	1	1.17	0.22	1	1.06
BnaA09G0415200ZS	0.01	0.03	0	0.02	0	0	0	0.01	0.13	0.72	0	0	0.01	0.11	0	0
BnaC03G0659800ZS	1.14	1.02	0.41	0.41	0.48	0.57	0.43	0.67	0.66	0.73	1.23	1.18	1.24	0.11	0.73	0.91
BnaA08G0207800ZS	0.81	0.72	0.59	0.6	0.66	0.7	0.49	0.58	0.62	0.62	0.92	0.94	0.97	0.4	0.49	0.76
BnaC03G0659900ZS	0.9	0.85	0.72	0.71	0.66	0.79	0.56	0.67	0.76	0.78	0.99	0.98	0.96	0.58	0.59	0.79
BnaA09G0415100ZS	0.67	0.53	0.26	0.37	0.34	0.52	0.57	0.55	1.97	0.42	0.44	0.49	0.53	0.06	0.38	0.56
BnaA08G0204500ZS	1.66	1.32	0.92	0.84	0.79	0.61	0.76	0.72	1.29	1.09	1.03	1.3	1.39	0.13	0.57	0.41
BnaA09G0410300ZS	1.36	1.36	0.75	0.74	0.72	0.74	0.69	0.75	1.39	1.24	1.07	1.39	1.5	0.23	0.84	0.51
BnaC03G0665100ZS	1.61	1.31	1.02	0.96	0.98	0.91	0.79	0.74	1.17	0.95	0.93	1.33	1.27	0.15	0.44	0.47
BnaA08G0086700ZS	0	0	0	0	0.01	0	0	0	0.1	0	0	0	0	0	0	0
BnaC08G0124000ZS	0	0	0	0	0	0	0	0.01	0.1	0	0	0	0	0	0	0
BnaA09G0402900ZS	0.83	0.69	0.59	0.53	0.59	0.65	0.58	0.65	1	0.6	0.62	0.79	0.36	0	0.73	1
BnaC05G0270100ZS	0.96	0.84	0.78	0.8	0.79	0.84	0.71	0.78	0.98	0.77	0.89	0.87	0.75	0.18	0.84	1.06
BnaA09G0402800ZS	1.37	1.22	1.06	1.08	1.08	1.23	1.01	1.03	1.53	1.23	1.21	1.31	1.19	1.03	1.08	1.26
BnaA08G0086600ZS	1.41	1.27	1.03	1.05	1.04	1.14	0.91	0.8	1.2	0.99	1.06	1.1	1.07	0.24	1.08	1.1
BnaC05G0270200ZS	1.26	1.13	0.97	0.93	0.97	1.09	0.86	0.76	1.24	1.05	1.07	1.13	1	0.83	1.01	1.19
BnaA09G0401500ZS	0.38	0.21	0.03	0.07	0.09	0.25	0.4	0.54	0.05	0.22	0.02	0.06	0	0.05	0.82	0.63
BnaC05G0271400ZS	0	0	0	0	0	0	0	0	0.02	0	0	0	0	0	0	0
BnaA08G0082900ZS	0.15	0.19	0.2	0.19	0.16	0.1	0.1	0.05	0.08	0.04	0.02	0.03	0.07	0.03	0.09	0.05
BnaC05G0276500ZS	0.95	0.78	0.68	0.69	0.68	0.72	0.59	0.66	0.9	0.71	0.76	0.82	0.75	0.13	0.62	0.71
BnaA09G0397600ZS	1	0.92	1.06	1.05	1.08	0.96	0.9	0.8	0.96	0.74	0.87	1.03	1.13	0.39	0.64	0.68
BnaC08G0117100ZS	0.47	0.66	1.01	1	1.02	1.03	0.82	0.79	0.87	0.77	0.89	1.02	1.03	0.58	0.73	0.68
BnaC08G0106700ZS	0.69	0.53	0.65	0.7	0.69	0.99	0.23	0.31	0.78	0.45	0.62	0.24	0.37	0.45	0.22	0.61
BnaC05G0282700ZS	0.89	0.81	0.9	0.88	0.89	0.92	0.71	0.57	1.12	0.65	0.29	0.37	0.6	0.29	0.59	0.36
BnaA05G0325700ZS	0.61	0.53	0.48	0.5	0.44	0.51	0.89	0.76	0.51	0.46	0.52	0.39	0.42	0.09	0.56	0.5
BnaC05G0342200ZS	0.4	0.46	0.36	0.36	0.38	0.44	0.52	0.59	0.55	0.42	0.5	0.53	0.58	0.05	0.4	0.34
BnaA05G0320400ZS	0	0	0.01	0.01	0	0.02	0	0	2.95	0.01	0.01	0	0.01	0.01	0	0.01
BnaC05G0330500ZS	0.9	0.79	0.47	0.46	0.49	0.54	0.64	0.55	0.72	0.6	0.63	0.53	0.6	0	0.78	0.4
BnaC06G0100400ZS	0	0	0	0	0	0	0	0	0	0	0	0	0	0	0	0
BnaA08G0069100ZS	1.24	1.16	0.94	0.88	0.87	0.98	1.03	1.08	1.15	1.05	1.02	0.88	0.88	0.32	1.26	1.45
BnaC08G0096900ZS	1.13	1.01	0.7	0.8	0.74	0.62	0.86	0.8	1.06	1	0.73	0.66	0.76	0.17	1.14	1.04
BnaA10G0114200ZS	0.31	0.29	0.05	0.05	0.01	0.02	0.14	0.19	0.63	0.24	0.01	0.05	0.04	0.01	0.04	0.06
BnaC09G0380200ZS	0.39	0.35	0.06	0.05	0.06	0.04	0.17	0.26	0.69	0.27	0.03	0.03	0.05	0	0.06	0.04
BnaA09G0375600ZS	0	0	0	0	0	0	0	0	0	0.05	0	0	0	0	0	0
BnaC06G0098600ZS	0	0	0	0	0.02	0	0	0.02	0.01	0.08	0	0	0	0	0	0
BnaA05G0313200ZS	1.86	1.9	1.35	1.36	1.45	1.08	1.54	1.81	1.44	1.96	1.03	1.05	1.39	0.22	2.32	1.04
BnaC05G0326000ZS	2.4	2.43	1.8	1.77	1.81	1.52	1.93	2.21	1.66	2.29	1.71	1.93	2.32	0.49	2.52	1.65
BnaA08G0058400ZS	1.51	1.24	1.01	1.01	1.01	0.98	1.24	1.26	1.27	1.54	1.25	1.34	1.41	1.08	1.11	1
BnaA09G0180400ZS	0.8	0.24	0.08	0.13	0.25	0.81	0.56	0.67	0.18	1.04	0.6	0.59	0.81	1.13	1.22	0.73
BnaA05G0190900ZS	1.35	1.29	1.29	1.26	1.26	1.26	1.39	1.3	1.35	1.6	0.97	1.02	1.08	1.16	1.02	1.28
BnaC05G0320700ZS	1.45	1.38	1.43	1.41	1.42	1.4	1.41	1.32	1.39	1.49	1.25	1.09	1.24	1.02	1.28	1.34
BnaC09G0205200ZS	0.53	0.09	0.1	0.18	0.24	0.86	0.66	0.47	0.22	0.87	0.54	0.37	0.7	0.9	0.87	0.25
BnaA10G0068300ZS	1.37	1.25	1.13	1.08	1.07	1.08	0.96	0.94	1.12	1.18	1.11	1.26	1.13	0.54	1.15	1.08
BnaC04G0133000ZS	0.15	0.16	0.13	0.11	0.11	0.16	0.14	0.08	0.04	0.07	0.1	0.09	0.06	0	0.11	0.18
BnaA05G0185500ZS	0	0	0.05	0.06	0.03	0.06	0	0	0	2.49	0.96	0.57	0.47	2.34	0	0
BnaC05G0315600ZS	0	0	0.05	0.14	0.07	0.12	0	0	0.07	2.74	1.51	1.05	0.96	2.8	0	0
BnaC07G0028300ZS	0.27	0.21	0.12	0.16	0.09	0.24	0.15	0.06	0.25	0.29	0.09	0.12	0.08	0.01	0.17	0.21
BnaC07G0160400ZS	1	0.85	0.73	0.74	0.69	0.93	0.51	0.74	0.84	0.78	0.9	0.83	0.68	0.22	1.68	1.98
BnaA07G0039400ZS	0	0	0	0	0	0	0	0	0	0	0	0	0	0	0	0
BnaA05G0184500ZS	0.31	0.06	0	0.03	0.03	0.1	0.05	0.02	0.06	0.05	0.04	0.06	0.06	0	0.01	0.12
BnaA06G0041800ZS	1.04	0.95	0.67	0.68	0.66	0.6	0.54	0.73	0.99	0.91	0.98	1.07	1.07	0.4	0.86	0.72
BnaC06G0027800ZS	1.13	1	0.84	0.81	0.84	0.76	0.79	0.93	1.18	1.14	1.01	1.13	1.09	0.39	0.92	0.89
BnaA08G0036200ZS	1.93	2.02	1.26	1.24	1.24	1.27	1.8	1.62	1.55	1.43	1.25	1.1	1.15	0.55	1.48	1.27
BnaC08G0043900ZS	1.84	1.78	0.85	0.87	0.9	0.89	1.34	1.33	1.35	1.3	0.83	0.69	0.79	0.11	1.33	1.04
BnaA05G0183000ZS	2.12	2.31	1.54	1.55	1.56	1.49	1.71	1.66	1.74	1.55	1.12	1.1	1.18	0.67	1.63	1.19
BnaC05G0311300ZS	2.05	2.16	1.47	1.48	1.51	1.47	1.77	1.64	1.7	1.71	1.55	1.54	1.6	0.81	1.72	1.38
BnaA03G0466500ZS	0	0	0	0	0	0	0	0	0	0	0	0	0	0	0	0
BnaC06G0036500ZS	1.44	1.36	1.11	1.09	1.13	1.24	0.97	1.09	1.21	1.21	1.27	1.27	1.28	0.55	1.29	1.29
BnaC08G0038200ZS	0.03	0	0.07	0.06	0.04	0.07	0.07	0.02	0.11	1.77	0.98	0.67	0.45	2.31	0.01	0
BnaA05G0180800ZS	1.03	0.94	0.93	0.92	1	1.11	1.13	1.07	1.12	0.9	0.91	1.05	1	0.12	1.08	1.06
BnaC05G0305400ZS	0.82	0.75	0.91	0.93	0.9	0.95	1.06	0.96	1.01	0.72	0.97	1.08	1.03	0.03	0.94	0.85
BnaA06G0034200ZS	0.55	0.49	0.16	0.18	0.21	0.18	0.15	0.18	0.8	0.43	0.17	0.5	0.17	0.03	0.31	0.08
BnaC06G0041800ZS	0.52	0.46	0.2	0.17	0.2	0.16	0.18	0.24	0.9	0.5	0.23	0.43	0.19	0.06	0.48	0.31
BnaA08G0027400ZS	1.28	1.19	0.88	0.85	0.88	0.95	0.81	0.98	1.03	1.05	0.94	0.94	0.93	0.61	1.01	0.94
BnaA06G0032300ZS	0.65	0.56	0.65	0.65	0.69	0.85	0.49	0.52	0.42	0.41	0.42	0.31	0.37	0.11	0.5	0.68
BnaC06G0044900ZS	0.18	0.13	0.06	0.06	0.09	0.08	0.03	0.05	0.11	0	0.06	0	0	0	0.11	0.09
BnaC03G0781300ZS	1.4	1.29	1.19	1.16	1.19	1.2	0.97	1.03	1.09	1.12	1.08	1.02	1.04	0.78	1.26	1.2
BnaA05G0178000ZS	0	0	0	0	0	0	0	0	0	0.18	0.01	0	0	0.25	0	0
BnaA06G0031300ZS	0	0	0	0	0	0.02	0	0	0	0.38	0.09	0.05	0.04	0.64	0	0
BnaC06G0046900ZS	0.04	0.05	0.02	0	0.01	0.03	0	0.02	0	0.21	0.09	0.03	0.06	0.39	0.05	0.03
BnaC05G0300500ZS	0	0	0	0	0	0	0	0	0	0.09	0	0	0	0.13	0	0
BnaC03G0783100ZS	0	0	0	0	0	0.01	0	0	0.01	0.96	0.19	0.11	0.01	0.98	0	0
BnaA06G0025100ZS	0.87	1.2	0.96	1.01	0.99	1.11	0.69	0.82	1.23	1.2	0.8	0.6	0.93	0.81	0.75	0.62
BnaC06G0054700ZS	1.14	1.15	0.88	0.84	0.86	0.87	0.69	0.69	1.1	0.92	0.78	0.52	0.81	0.35	0.69	0.55
BnaC06G0054800ZS	0	0	0	0	0	0	0	0	0.06	0	0	0	0	0	0	0
BnaC05G0292600ZS	0.01	0.02	0	0	0.02	0	0	0	0.03	0	0	0	0	0	0	0
BnaA08G0020900ZS	1.4	1.34	1.08	1.11	1.11	1.13	0.96	1.27	1.36	1.31	1.23	1.2	1.24	0.28	1.45	1.35
BnaC03G0787700ZS	1.33	1.28	1.05	1.03	0.99	1.06	0.85	1.09	1.24	1.14	1.08	1.02	1.03	0.34	1.27	1.16
BnaA05G0171500ZS	0.27	0.25	0.21	0.24	0.32	0.88	0.3	0.24	0.11	0.08	0.89	0.43	0.36	0.03	0.84	1.65
BnaA05G0170700ZS	1.55	1.48	0.97	0.91	1.19	1.03	1.11	1.1	1.36	1.48	2.24	2.41	2.47	0.75	1.97	1.77
BnaA06G0021900ZS	0.59	0.57	0.33	0.35	0.58	0.48	0.51	0.58	0.37	0.7	0.69	0.66	1.19	0.03	0.84	0.14
BnaC06G0059900ZS	0.98	0.89	0.54	0.54	0.6	0.7	0.5	0.67	0.75	0.87	1.47	1.01	1.59	0.01	1.2	0.5
BnaC06G0120300ZS	0.9	0.87	0.13	0.2	0.13	0.22	0.23	0.3	0.28	0.39	1.04	1.06	1.11	0.18	0.14	0.39
BnaA05G0167300ZS	0.54	0.5	0.4	0.49	0.7	0.54	0.67	1.27	1.47	1.42	0.13	0.3	0.22	0	1.09	1.31
BnaC06G0121000ZS	0.67	0.55	0.71	0.74	1.07	0.77	0.75	1.26	1.39	1.42	0.03	0.01	0.03	0.01	1.19	1.08
BnaA05G0164800ZS	0.69	0.66	0.36	0.34	0.34	0.24	0.47	0.66	0.79	0.69	0.12	0.05	0.06	0	0.71	0.48
BnaC06G0124400ZS	0.79	0.88	0.69	0.7	0.75	0.73	0.52	0.59	0.71	0.83	0.56	0.46	0.42	0.05	0.65	0.68
BnaA06G0013800ZS	0.09	0.03	0.36	0.51	0.73	0.6	0.14	0.01	0.88	0.93	0.74	0.89	0.95	0	0.11	0
BnaA05G0155900ZS	0	0	0.01	0.02	0.01	0.03	0	0	0.11	1.29	0.55	0.28	0.19	1.66	0	0
BnaA08G0009000ZS	0.04	0.1	0.08	0.08	0.06	0.15	0.03	0.01	0.68	1.02	0.38	0.2	0.14	1.41	0	0.07
BnaC03G0806100ZS	0.24	0.31	0.1	0.11	0.12	0.21	0.01	0.02	0.71	0.93	0.4	0.2	0.2	1.29	0.04	0.08
BnaC06G0137500ZS	0.04	0.24	0.05	0.06	0.04	0.12	0.01	0.02	0.4	1.15	0.34	0.16	0.09	1.45	0.02	0.09
BnaA09G0183500ZS	0	0	0	0	0	0	0	0	0.02	0.56	0	0	0	0.06	0	0
BnaC09G0208600ZS	0	0.01	0	0	0	0	0	0	0.03	0.42	0.01	0.01	0	0.16	0	0
BnaA09G0182300ZS	0.01	0	0.02	0	0.04	0.16	0	0	0.39	0.78	1.04	0.32	0.43	1.55	0	0.02
BnaC09G0206500ZS	0.07	0.08	0.11	0.05	0.15	0.13	0.09	0.04	0.48	1.03	0.83	0.44	0.26	1.5	0.09	0.02
BnaA09G0575900ZS	0	0	0	0.03	0.01	0.03	0	0	0.21	1.03	0.4	0.16	0.03	1.47	0	0
BnaC08G0427300ZS	0	0.01	0.03	0.04	0.03	0.05	0	0.01	0.03	1.55	1.15	0.69	0.53	2.02	0	0.04
BnaA06G0066400ZS	0.58	0.47	0.49	0.5	0.52	0.45	0.35	0.48	1.23	2.7	1.4	2.1	1.65	1.24	0.52	0.13
BnaC05G0082000ZS	0.45	0.47	0.54	0.54	0.47	0.47	0.43	0.54	1.32	2.65	1.41	2.02	1.61	1.55	0.42	0.21
BnaA01G0271700ZS	1.05	1.06	1.12	1.15	1.25	1.27	1.1	1.08	1.11	1.03	0.87	0.97	0.97	0.3	1.03	1.1
BnaC01G0332200ZS	1.44	1.43	1.41	1.41	1.47	1.44	1.42	1.44	1.5	1.39	1.54	1.67	1.66	0.71	1.31	1.39
BnaA01G0276500ZS	1.2	1.1	0.95	0.94	0.98	1.11	0.71	0.81	0.92	0.94	1.08	1.26	1.28	0.61	1.06	1.02
BnaA03G0578100ZS	0	0	0	0	0	0	0	0	0	0	0	0	0	0	0	0
BnaC01G0338400ZS	1.18	1.1	0.86	0.91	0.93	1.02	0.69	0.75	0.89	0.9	0.94	1.01	0.97	0.39	0.99	1.01
BnaC04G0232600ZS	0.84	0.69	0.5	0.5	0.48	0.66	0.47	0.52	0.58	0.46	0.69	0.77	0.69	0.23	0.72	0.77
BnaA01G0279900ZS	0.11	0.05	0.41	0.5	0.51	1.03	0.26	0.29	0.12	0.82	1.52	0.59	0.9	0.23	0.56	1.04
BnaC01G0342700ZS	0.08	0.05	0.23	0.16	0.23	0.89	0.17	0.1	0.14	0.76	0.7	0.08	0.27	0.16	0.45	0.75
BnaC09G0175700ZS	0	0	0	0	0	0	0	0	0	0	0	0	0	0	0	0
BnaC04G0242600ZS	0	0.01	0	0	0	0	0	0	0	0	0	0	0	0	0	0
BnaC09G0172400ZS	1.54	1.88	0	0	0.02	0	0	0.97	1	1.38	1.08	0.03	1.15	0.01	0.51	0.24
BnaA03G0591100ZS	0.03	1.07	2.31	2.38	2.3	1.63	2.38	2.32	0.09	0.04	0.04	0	0.03	0.04	1.98	0.92
BnaA09G0129300ZS	0.22	0.24	0	0	0	0	0	0	2.44	0.22	0.14	0	0.12	0	0	0.04
BnaC09G0137200ZS	0.96	0.57	0.14	0.18	0.14	0.04	0.06	0.28	1.88	0.02	0.05	0.01	0.13	0	0.16	0.05
BnaA09G0131500ZS	0.76	0.71	0.52	0.56	0.6	0.51	0.59	0.7	1.22	0.82	0.13	0.43	0.15	0.43	0.66	0.56
BnaC04G0250400ZS	0	0	0	0	0	0	0	0	0	0	0	0	0	0.01	0	0
BnaC09G0139400ZS	1.46	1.45	1.34	1.32	1.35	1.32	1.43	1.39	1.56	1.5	1.41	1.54	1.45	0.84	1.28	1.24
BnaA09G0131700ZS	0.02	0.05	0.22	0.21	0.25	0.33	0.53	0.46	0.16	0.48	0.88	0.1	0.24	0.21	0.1	0.38
BnaC09G0139600ZS	0.03	0.04	0.13	0.12	0.08	0.2	0.19	0.24	0.05	0.1	0.95	0.34	0.25	0.52	0.21	0.4
BnaA09G0134600ZS	0.9	0.71	0.64	0.61	0.64	0.62	0.94	0.93	1.01	0.75	0.55	0.69	0.48	0.09	1.08	1.01
BnaC09G0143200ZS	0.76	0.61	0.42	0.48	0.53	0.51	0.89	0.88	0.96	1.09	0.54	0.73	0.51	0.06	1.02	0.8
BnaA09G0148400ZS	1.1	1	0.83	0.83	0.82	0.93	0.74	0.87	0.96	0.91	0.9	0.96	0.95	0.18	0.95	0.8
BnaA09G0142100ZS	0.97	0.87	0.79	0.76	0.8	0.92	0.65	0.71	0.87	0.86	1.04	1.11	1.02	0.84	0.78	0.84
BnaC09G0153300ZS	1.15	1.07	0.96	0.95	0.97	1.04	0.74	0.8	1.03	0.95	1.09	1.21	1.11	0.74	0.89	0.93
BnaA09G0121600ZS	0.96	0.74	0.48	0.48	0.44	0.36	0.48	0.59	1.05	0.64	0.36	0.37	0.37	0.13	1.02	0.18
BnaC09G0127400ZS	1.01	0.79	0.23	0.2	0.16	0.11	0.3	0.54	0.98	0.58	0.27	0.31	0.42	0.06	1.04	0.07
BnaA02G0154400ZS	1.24	1.29	1.11	1.08	1.05	0.99	1.41	1.36	1.1	1.83	0.74	0.61	0.84	1.23	1.62	0.79
BnaA07G0281500ZS	1.33	1.21	1.12	1.07	1.03	0.93	1.07	1.2	1.17	1.77	0.43	0.36	0.37	1.59	1.36	0.44
BnaC02G0197600ZS	1.24	1.24	1.02	1.02	0.91	1.04	1.58	1.52	1.11	1.87	1.07	0.72	0.94	1.65	2.01	1.28
BnaC06G0322500ZS	1.32	1.27	1.17	1.14	1.08	0.8	1.2	1.19	1.36	1.44	0.62	0.67	0.73	0.18	1.38	0.66
BnaA07G0282400ZS	1.34	1.3	1.13	1.12	1.15	1.19	1.13	1.23	1.36	1.25	1.24	1.38	1.33	1.03	1.28	1.3
BnaC02G0200400ZS	0.61	0.83	0.67	0.72	0.75	0.78	0.35	0.4	0.83	1.03	0.85	0.88	0.73	1.71	0.57	0.59
BnaC06G0323500ZS	1.3	1.29	1.09	1.1	1.11	1.15	1.14	1.24	1.44	1.23	1.26	1.35	1.31	1.01	1.19	1.2
BnaA02G0156900ZS	1.72	2.53	2.72	2.76	2.8	2.89	0	0	0.18	0.89	2.06	0.32	0.64	0.18	2.72	3.16
BnaC02G0200600ZS	2.11	2.78	2.66	2.66	2.72	2.72	0	0	0.14	0.23	1.57	0.46	0.64	0.22	2.01	2.85
BnaA07G0287100ZS	0.61	0.82	0.56	0.53	0.45	1.05	1.02	1.48	1.87	1.51	1.89	2.13	2.01	0.89	1.5	1.88
BnaC06G0329200ZS	0.54	0.69	0.29	0.25	0.38	0.78	0.98	1.52	1.75	1.24	1.79	1.87	1.84	0.77	1.46	1.98
BnaA02G0165600ZS	0.43	0.56	0.24	0.22	0.24	0.09	0.36	0.54	1.14	0.82	0	0	0.01	0.06	0.4	0.08
BnaA07G0280600ZS	0.14	0.11	0	0	0.01	0	0.05	0.07	0.36	0.16	0.02	0	0	0.09	0.06	0
BnaC02G0212200ZS	0.58	0.46	0.21	0.23	0.19	0.08	0.33	0.51	1.01	0.77	0.05	0.03	0.09	0.01	0.45	0.09
BnaA02G0169000ZS	0.54	0.46	0.63	0.63	0.86	0.97	0.85	0.8	0.41	0.27	2	0.86	0.73	0	0.74	1.67
BnaC02G0217200ZS	1.21	1.13	0.96	0.97	1.03	1.28	0.83	0.73	0.34	0.25	2.17	1.27	1.26	0.07	1	1.22
BnaA07G0296500ZS	0.01	0.04	0.37	0.39	0.79	1.34	0.04	0	0.08	1.88	1.99	0.47	0.34	1.24	0.42	2.11
BnaC06G0343200ZS	0.96	0.82	0.57	0.56	0.58	0.58	0.45	0.52	0.85	0.76	0.8	0.74	0.76	0.43	0.95	0.75
BnaA02G0170700ZS	0	0	0	0	0	0	0	0	0	1.03	0.03	0	0	0.55	0	0
BnaC02G0219500ZS	0	0	0	0	0	0	0	0	0.01	0.92	0.07	0.02	0	0.55	0	0
BnaA02G0171000ZS	0	0	0.15	0.14	0.08	0.27	0.02	0	0.06	1.65	1.23	0.79	0.62	2.34	0	0.02
BnaA07G0298600ZS	0	0.07	0.21	0.26	0.18	0.36	0.28	0.46	0.33	2.12	1.67	1.27	1.05	2.79	0.02	0.02
BnaC02G0219600ZS	0	0.03	0.16	0.2	0.08	0.23	0	0.01	0.04	1.97	1.61	1.18	0.91	2.7	0	0.04
BnaC06G0344600ZS	0	0.3	0.42	0.36	0.29	0.54	0.62	0.76	0.34	1.94	1.54	1.2	0.99	2.64	0.15	0.17
BnaA02G0174200ZS	0	0.01	0	0	0	0	0.01	0.16	0.2	0.07	0	0.03	0.01	0	0	0
BnaA07G0301700ZS	0	0	0	0.01	0	0.04	0.04	0.1	1.02	0.84	0	0.2	0	0.04	0	0
BnaC02G0224900ZS	0	0	0	0	0	0	0.08	0.13	0.1	0.14	0.03	0.91	0.04	0.03	0	0
BnaC06G0349500ZS	0	0	0.02	0.02	0	0.04	0.23	0.19	1.18	0.73	0	0.45	0	0.03	0	0
BnaA07G0275100ZS	1.24	1.41	1.48	1.46	1.51	1.47	1.66	1.71	1.82	1.9	1.36	1.62	1.44	0.17	1.57	0.44
BnaA07G0303400ZS	0	0.05	0.01	0	0	0.05	0	0.06	0.6	0.04	0.03	0.03	0.29	0	0	0.03
BnaC06G0352200ZS	0.02	0.13	0.15	0.11	0.08	0.22	0.13	0.16	0.7	0	0.06	0.28	0.51	0	0.15	0.08
BnaA07G0303900ZS	2.78	2.65	0.87	0.97	0.85	0.29	0.6	1.31	0.51	0.86	0.05	0.1	0.17	0.03	2.49	0.27
BnaC03G0506800ZS	0.01	0.01	0	0	0	0	0	0	0	0	0	0	0	0	0	0
BnaC06G0352600ZS	2.71	2.5	0.9	0.95	0.77	0.25	0.66	1.25	0.66	1.02	0.44	0.61	1.05	0.04	2.54	0.19
BnaA07G0304300ZS	0	0	0	0.03	0	0.02	0	0	0.03	0	0.42	0.08	0.38	0	0.08	0.18
BnaC06G0352900ZS	0	0	0.07	0	0	0.12	0.07	0	0.04	0	0.99	0.67	1.16	0.02	0	0.32
BnaA07G0272700ZS	0.11	0.13	0.15	0.15	0.17	0.13	0.16	0.06	0.27	0.1	0.04	0.06	0.02	0	0.06	0.08
BnaA07G0306200ZS	0.63	0.52	0.33	0.34	0.36	0.37	0.37	0.42	0.72	0.46	0.26	0.47	0.12	0	0.5	0.71
BnaC06G0355700ZS	0.54	0.49	0.26	0.25	0.32	0.32	0.27	0.32	0.72	0.46	0.31	0.52	0.1	0.01	0.45	0.57
BnaA02G0179200ZS	0	0.03	0.19	0.02	0.06	0.06	0.1	0.01	1.34	1.47	1.18	1.09	0	0	0	0.02
BnaC06G0356800ZS	0	0	0	0	0	0	0	0	1.44	2.25	1.92	0.01	2	0.02	0	0.01
BnaC01G0232300ZS	0.66	0.47	0.27	0.27	0.27	0.42	0.23	0.23	0.44	0.78	0.25	0.21	0.15	0.79	0.35	0.38
BnaC03G0615300ZS	1.13	0.98	0.81	0.77	0.78	0.89	0.87	0.7	0.95	0.83	0.88	0.99	0.78	0.37	0.96	1.06
BnaA07G0271500ZS	0.15	0.28	1.19	1.27	1.45	2.02	0.24	0.86	0.66	0.4	1.99	1.84	1.86	0.46	0.61	1.24
BnaA07G0309700ZS	0.55	0.48	0.97	1.07	1.15	1.81	0.03	0.22	1.2	0.34	2.71	2.52	2.74	0.08	0.45	1.61
BnaC06G0359500ZS	0.95	0.65	1.26	1.34	1.37	1.95	0.1	0.17	1.24	0.32	2.69	2.57	2.56	0.12	0.57	1.57
BnaC06G0307300ZS	0.02	0.19	1.13	1.2	1.3	1.85	0.1	0.48	0.46	0.2	2.22	1.72	1.86	0.21	0.59	1.21
BnaA07G0309800ZS	0	0	0.01	0.03	0	0.01	0	0	2.86	0.01	0	0	0.03	0.01	0	0.01
BnaC06G0359600ZS	0	0	0	0	0	0.03	0	0	2.77	0.01	0	0.01	0.01	0	0	0.01
BnaA10G0262100ZS	0	0	0.09	0.13	0.08	0.11	0	0	0.16	3.18	1.12	0.77	0.67	2.67	0	0.02
BnaA02G0025600ZS	0	0	0	0	0	0	0	0	0.03	2.48	0.25	0.08	0.03	0.82	0	0
BnaC02G0027700ZS	0	0	0	0	0	0	0	0	0	2.33	0	0.03	0	0.32	0	0
BnaC09G0576300ZS	0	0	0.18	0.3	0.17	0.24	0	0	0.26	3.08	1.72	1.32	1.13	3.1	0	0.05
BnaA07G0315100ZS	0.83	0.75	0.88	0.88	0.9	1.04	0.94	0.98	0.85	0.67	1.37	1.22	1.06	0.21	1	1.15
BnaC06G0366500ZS	0.76	0.64	0.74	0.76	0.79	0.86	0.85	0.86	0.89	0.64	0.67	0.69	0.54	0.14	0.99	0.74
BnaC06G0367000ZS	0.9	0.7	0.65	0.66	0.75	0.74	0.53	0.8	0.69	0.92	0.63	0.82	0.63	0	0.91	0.58
BnaA07G0316200ZS	0.1	0.23	0.24	0.26	0.33	0.92	0.23	0.15	0.21	0.06	0.87	0.74	1.01	0.02	1.12	1.4
BnaC06G0367500ZS	0.12	0.17	0.43	0.52	0.57	1.04	0.36	0.23	0.18	0.03	0.67	0.76	0.9	0.14	0.97	1.36
BnaA07G0324800ZS	1.43	1.31	1	0.99	1	0.93	1.02	1.12	1.29	1.27	1.06	1.05	1.09	0.42	1.29	1.01
BnaC06G0380000ZS	1.22	1.11	0.76	0.79	0.79	0.76	0.8	0.94	1.16	1.12	0.98	0.92	0.99	0.42	1.13	0.94
BnaC06G0294300ZS	0.48	0.29	0.07	0.11	0.08	0.05	0.37	0.35	0.4	0.57	0.14	0.33	0.19	0.76	0.23	0.04
BnaC02G0257700ZS	1.25	1.01	0.81	0.76	0.78	1.25	0	0.28	0.79	1.08	0.17	0.4	0.94	1.29	0.63	0.05
BnaC06G0382600ZS	0.61	0.49	0.02	0	0.03	0.09	0	0.03	0.4	0.35	0.02	0	0.08	0	0.08	0
BnaA07G0327800ZS	0	0.22	0.01	0	0.03	0.03	0	0	1.28	0.77	0.22	0.15	0.1	0.99	0.32	0.04
BnaC02G0259500ZS	0	0	0	0	0	0	0	0	0.69	0.02	0	0	0	0.05	0	0
BnaA07G0328000ZS	1.25	1.23	0.88	0.86	0.88	0.83	1.07	1.21	1.18	1.06	0.81	0.92	0.9	0.86	1.05	0.9
BnaC06G0383900ZS	1.18	1.13	0.93	0.88	0.83	0.76	1.07	1.1	1.23	1.15	0.8	0.77	0.78	0.75	1.08	0.76
BnaA02G0195000ZS	0.86	0.82	0.82	0.86	0.83	0.91	0.56	0.58	0.93	0.88	1.04	1.11	1.06	0.86	0.68	0.93
BnaA07G0262400ZS	1.04	0.82	0.69	0.74	0.7	0.78	0.81	0.71	0.97	0.8	0.73	0.83	0.76	0.51	0.77	0.78
BnaC02G0259600ZS	0.94	0.98	0.94	0.97	0.97	0.97	0.62	0.62	0.83	0.81	1.01	1.07	0.98	0.53	0.71	0.81
BnaC06G0293400ZS	0.79	0.67	0.53	0.56	0.57	0.59	0.51	0.46	0.94	0.92	0.86	0.97	0.84	1.24	0.62	0.74
BnaA07G0262200ZS	0.59	0.85	0.34	0.39	0.34	0.21	0.32	0.63	1.03	0.68	0.31	0.26	0.45	0.02	0.29	0.01
BnaC06G0384400ZS	0.95	0.95	0.26	0.27	0.28	0.07	0.58	0.7	1.19	0.85	0.84	0.68	1.14	0.01	0.6	0.01
BnaC03G0184000ZS	0.6	0.43	0.34	0.31	0.28	0.33	0.37	0.21	0.55	0.29	0.27	0.28	0.2	0.13	0.24	0.25
BnaA07G0333100ZS	1.06	0.84	0.43	0.45	0.49	0.53	0.61	0.65	1.11	0.64	0.48	0.72	0.32	0.03	0.74	0.73
BnaC06G0391200ZS	1.01	0.84	0.53	0.54	0.57	0.59	0.64	0.69	1.12	0.7	0.53	0.72	0.35	0.08	0.75	0.79
BnaA09G0259500ZS	0	0	0	0	0	0.02	0	0.02	0	0.16	0	0	0	0.05	0	0
BnaC06G0288200ZS	0.01	0.1	0	0.02	0.05	0.12	0.03	0.04	0.04	0.18	0.09	0	0.13	0.03	0.02	0.11
BnaA02G0203800ZS	0	0	0	0	0	0	0.19	0.32	1.16	0.49	0	0	0	0	0.18	0
BnaA07G0257600ZS	0	0	0.01	0	0	0	0.61	0.9	1.66	1.11	0.01	0	0	0	0.31	0
BnaC02G0271000ZS	0	0	0	0	0.01	0	0.42	0.6	1.67	0.94	0	0	0	0	0.39	0
BnaC06G0286700ZS	0	0.03	0.16	0.15	0.13	0.06	0.91	1.27	1.64	1.05	0.03	0	0	0.05	0.06	0
BnaA07G0337700ZS	1.57	1.44	1.16	1.18	1.17	1.19	0.96	1.12	1.36	1.61	1.11	1.07	1.14	0.84	1.44	1.37
BnaC06G0396800ZS	1.58	1.38	1.14	1.15	1.13	1.17	1.1	1.25	1.49	1.66	1.39	1.35	1.48	0.66	1.54	1.49
BnaC06G0398200ZS	1.27	1.1	0.73	0.72	0.76	0.67	0.69	0.87	1.14	1.05	0.75	0.61	0.78	0.1	1.13	0.94
BnaA07G0339200ZS	0	0	0	0	0	0	0	0	0	0	0.04	0	0.07	0	0.36	0.07
BnaC06G0399000ZS	1.18	1.73	0.41	0.45	0.39	0.19	0.36	0.75	1.23	0.6	0.01	0.03	0.03	0.12	0.43	0.08
BnaA07G0339500ZS	0	0	0	0	0	0	0	0	0	0	0	0	0	0	0	0
BnaC06G0283000ZS	0.25	0.62	0.74	0.74	0.47	0.56	1.92	1.57	0.95	1.99	0	0	0	0.05	0.79	1.24
BnaC06G0399100ZS	0	0	0.02	0.03	0.01	0.05	0	0	0	0	0	0	0	0	0	0.04
BnaA07G0250900ZS	0	0	0	0	0.01	0	0	0	2.93	0	0	0.01	0.01	0	0	0.01
BnaC06G0277000ZS	0	0	0.01	0	0	0	0	0	2.81	0	0.02	0	0.01	0.01	0	0
BnaA07G0250600ZS	1.31	1.73	0.32	0.32	0.3	0.17	0	0.18	0.07	0	0.18	0.25	0.51	0.03	0.27	0.56
BnaA07G0347300ZS	0.41	0.31	0	0.02	0	0	0	0.09	0.02	0	0.06	0	0.03	0	0	0
BnaC06G0276500ZS	1.28	1.73	0.49	0.56	0.55	0.37	0	0.27	0.09	0.05	0	0.13	0.09	0.03	0.2	0.26
BnaC06G0409500ZS	0.83	0.43	0	0	0.05	0.05	0	0.31	0	0	0	0	0	0.03	0.01	0.15
BnaA02G0213600ZS	0	0	0	0	0	0	0	0	1.23	0	0	0	0.03	0	0	0
BnaA07G0249000ZS	0.87	1	0.62	0.59	0.57	0.39	0.94	0.99	1.71	1	0.57	0.46	0.34	1.25	0.76	0.33
BnaC01G0270800ZS	0	0	0	0	0	0	0	0	0	0.01	0	0	0	0	0	0
BnaC06G0274700ZS	0.42	0.54	0.47	0.42	0.44	0.36	0.58	0.56	1.63	0.61	0.33	0.26	0.18	0.53	0.47	0.26
BnaA05G0030300ZS	0.32	1.01	1.52	1.52	1.57	1.53	1.91	1.75	0.87	0.53	0.57	0.11	0.05	0	1.61	1.59
BnaC04G0033000ZS	0.35	0.39	0.91	0.89	0.97	0.69	1.34	1.18	0.76	0.38	0.12	0.05	0.03	0	1.02	0.66
BnaA02G0216100ZS	0	0.01	0	0	0	0	0.01	0.03	0.27	0.55	0.13	0.24	0.58	0.29	0	0
BnaA07G0352900ZS	0	0.05	0.01	0.01	0.03	0	0.01	0.01	0.61	0.64	0.24	0.41	0.69	0	0	0
BnaC02G0288400ZS	0	0.01	0	0	0	0.08	0.01	0.1	0.35	0.77	0.12	0.15	0.44	0.03	0	0
BnaC06G0271100ZS	0.03	0.05	0.05	0.12	0.1	0.18	0.07	0.05	0.31	0.39	0.15	0.06	0.25	0	0.04	0.01
BnaC06G0416100ZS	0.03	0.06	0	0.01	0.03	0.01	0.02	0.01	0.46	0.47	0.26	0.57	0.85	0	0	0
BnaA07G0355500ZS	1.73	1.49	1.29	1.31	1.33	1.3	1.16	1.23	0.95	0.95	0.97	1.12	1.19	0.17	1.24	0.8
BnaC06G0418500ZS	1.76	1.63	1.3	1.3	1.33	1.4	0.99	1.1	0.99	1	1.17	1.32	1.37	0.26	1.07	1.06
BnaA07G0356700ZS	1.58	1.46	1.31	1.3	1.32	1.34	1.22	1.25	1.29	1.41	1.27	1.21	1.34	0.58	1.43	1.34
BnaC06G0420000ZS	1.33	1.18	0.96	0.95	0.98	1.03	1	1.04	1.3	1.26	0.91	0.71	0.79	0.2	1.26	1.14
BnaA02G0221500ZS	0	0	0	0	0	0.01	0.02	0.16	0.29	0.37	0	0	0	0	0	0
BnaA07G0360800ZS	0	0	0	0	0	0	0	0.03	0.24	0.07	0	0.03	0.01	0	0.02	0
BnaC02G0298000ZS	0.03	0.04	0.01	0.03	0.01	0	0.02	0.13	0.32	0.42	0	0.01	0.04	0	0	0
BnaC06G0424300ZS	0	0	0	0	0	0	0	0.02	0.39	0.16	0	0.04	0.01	0	0	0
BnaA07G0241100ZS	0.16	0.05	0	0	0.02	0.06	0	0.11	0.32	0	0	0	0	0	0	0
BnaC06G0263600ZS	0.07	0.06	0.02	0.02	0.03	0	0.04	0.1	0.03	0.06	0	0	0	0	0.01	0
BnaA07G0367000ZS	1.55	1.38	1.23	1.2	1.22	1.32	1.13	1.23	1.56	1.41	1.4	1.47	1.41	1.12	1.19	1.3
BnaC06G0431500ZS	1.96	1.81	1.58	1.59	1.61	1.71	1.5	1.54	1.86	1.79	1.4	1.49	1.44	1.51	1.53	1.62
BnaA07G0367800ZS	0.98	0.95	0.84	0.85	0.88	0.99	0.78	0.84	0.95	1.1	1.07	1.1	1.02	1.43	1.01	1.11
BnaC06G0432200ZS	1.05	1.08	0.89	0.88	0.91	1.04	0.81	0.8	1	1.16	1.25	1.31	1.22	1.52	1.05	1.14
BnaA07G0368600ZS	0.02	0.05	0.03	0.01	0.02	0.02	0.04	0.12	0.69	0.53	0.06	0.03	0	0.59	0	0
BnaC06G0433000ZS	0.3	0.31	0.06	0.03	0.04	0.06	0.11	0.2	0.69	0.77	0.47	0.68	0.5	0.68	0.15	0.05
BnaA02G0226400ZS	0.69	0.58	0.43	0.44	0.47	0.52	0.38	0.58	0.95	0.6	0.57	0.57	0.51	0.16	0.37	0.59
BnaC02G0305200ZS	0.4	0.31	0.22	0.18	0.12	0.29	0.09	0.11	0.21	0.15	0.25	0.25	0.18	0.01	0.03	0.07
BnaC06G0261200ZS	1.08	1.15	1.07	1.03	1.06	0.98	1.07	1.1	1.36	0.98	0.18	0.12	0.19	0.14	0.98	0.85
BnaA07G0370600ZS	0.06	0.06	0.05	0.08	0.05	0.02	0.04	0.02	0.21	0.14	0	0	0	0.07	0.06	0
BnaC06G0435500ZS	0.24	0.23	0.05	0.03	0.03	0.11	0.08	0.08	0.22	0.12	0.03	0.02	0.03	0.06	0.13	0.03
BnaA07G0371300ZS	0	0	0	0.01	0	0	0	0	0	1.46	0.12	0.41	0.48	0.95	0	0
BnaC06G0436500ZS	0	0	0.01	0.02	0.01	0.01	0	0	0	1.47	0.42	0.32	0.22	1.41	0	0
BnaA07G0371800ZS	2.48	2.35	1.85	1.83	1.82	1.55	2.53	2.69	2.39	2.77	1.2	1.29	1.36	1.6	2.31	1.21
BnaC06G0437000ZS	2.44	2.28	1.73	1.71	1.73	1.49	2.45	2.6	2.41	2.65	1.39	1.42	1.63	1.17	2.24	1.57
BnaA07G0380800ZS	1.19	1.15	1.5	1.51	1.49	1.69	1.19	1.08	1.26	1.38	1.87	2.04	1.59	0.58	0.71	1.33
BnaA07G0381000ZS	1.05	0.99	0.88	0.94	0.93	0.93	0.92	0.95	1.29	1.06	1.16	1.27	1.19	0.43	0.89	1.08
BnaC06G0448000ZS	1.04	0.85	0.73	0.71	0.75	0.78	0.88	0.75	1.18	0.86	0.91	0.99	0.85	0.2	0.8	0.87
BnaA07G0381700ZS	1.4	1.17	0.91	0.94	0.99	1.11	0.81	0.91	1.15	0.9	0.65	0.75	0.69	0.68	1.02	1.19
BnaC02G0318500ZS	0	0	0	0	0	0	0	0	0	0	0	0	0	0	0	0
BnaA07G0230900ZS	0.56	0.41	0.23	0.22	0.27	0.29	0.37	0.47	0.71	0.4	0.24	0.45	0.15	0.01	0.34	0.62
BnaA07G0384400ZS	0.41	0.6	0.74	0.78	0.81	0.62	0.23	0.52	1.4	1.07	0	0.04	0.03	0.02	0.75	0.11
BnaC06G0452100ZS	0.21	0.39	0.89	0.86	0.81	0.41	0.23	0.38	1.3	1.11	0.3	0.22	0.39	0.01	0.58	0.03
BnaA07G0245100ZS	1.6	1.64	1.48	1.5	1.47	1.43	1.43	1.58	1.84	1.91	1.65	1.71	1.7	0.77	1.63	1.51
BnaC06G0268800ZS	1.56	1.53	1.36	1.35	1.36	1.34	1.28	1.52	1.82	1.87	1.65	1.69	1.73	0.73	1.53	1.57
BnaA07G0223700ZS	0	0.02	0.11	0.16	0.08	0.14	0	0	0.07	2.08	1.43	1.05	0.83	2.69	0	0.02
BnaC06G0240900ZS	0.02	0.01	0.11	0.14	0.09	0.14	0	0	0.11	2.07	1.46	1.06	0.87	2.71	0	0
BnaA06G0001200ZS	0.59	0.45	0.39	0.36	0.33	0.41	0.39	0.35	0.44	0.38	0.49	0.48	0.37	0.13	0.32	0.33
BnaC09G0204100ZS	0.03	0.02	0.06	0.02	0.02	0.09	0.06	0.04	0.13	0	0.04	0.02	0	0.01	0.02	0
BnaA02G0243800ZS	1.06	0.94	0.75	0.77	0.79	0.81	0.88	0.96	1.16	0.97	0.87	0.98	0.92	0.25	1.19	1.08
BnaA07G0226400ZS	1.31	1.15	0.81	0.82	0.88	0.9	1	1.01	1.31	1.13	0.96	1.06	1.01	0.26	1.08	1.11
BnaA07G0390100ZS	0.82	0.61	0.49	0.53	0.57	0.55	0.55	0.55	0.7	0.56	0.15	0.2	0.17	0.02	0.78	0.63
BnaC02G0327100ZS	0.9	0.86	0.69	0.65	0.71	0.72	0.8	0.86	1	0.82	0.84	0.95	0.79	0.29	0.95	0.91
BnaC06G0243700ZS	1.39	1.26	1	1	1.05	1.13	0.97	0.97	1.39	1.16	1.15	1.25	1.13	0.45	1.12	1.18
BnaC06G0457400ZS	0.98	0.75	0.6	0.59	0.63	0.67	0.62	0.61	0.89	0.68	0.55	0.58	0.62	0.03	0.93	0.78
BnaA02G0240800ZS	0	0	0	0	0	0	0	0	0.03	0.03	0.06	0.15	0.05	0.01	0	0
BnaA07G0227600ZS	0.86	0.76	0.5	0.49	0.54	0.63	0.6	0.72	1.04	0.78	0.44	0.43	0.3	0.04	0.66	0.81
BnaC02G0324200ZS	0	0	0	0	0	0	0	0	0	0	0	0	0	0	0	0
BnaC06G0245400ZS	0.76	0.64	0.33	0.31	0.33	0.35	0.4	0.48	0.81	0.55	0.32	0.34	0.26	0	0.51	0.6
BnaA02G0311500ZS	0.8	0.72	0.23	0.24	0.24	0.2	0.3	0.51	0.66	0.51	0.51	0.41	0.58	0.01	1.07	0.85
BnaA06G0413000ZS	0.98	0.87	0.79	0.85	0.87	0.83	0.67	0.69	0.82	0.7	0.23	0.33	0.22	0.09	0.7	0.7
BnaC02G0421700ZS	1.16	1.02	0.41	0.4	0.41	0.38	0.49	0.82	0.76	0.59	0.61	0.58	0.64	0.07	1.05	1.06
BnaC07G0263700ZS	0.84	0.77	0.55	0.59	0.55	0.45	0.62	0.74	0.94	0.83	0.16	0.22	0.28	0.1	0.9	0.52
BnaA02G0311900ZS	1	1.26	1.75	1.74	1.76	1.72	1.74	1.65	1.11	0.89	1.1	0.97	0.78	0.16	1.44	1.45
BnaA09G0216100ZS	0	0	0	0	0	0	0	0	0	0	0	0	0	0	0	0
BnaC09G0250800ZS	0	0	0	0	0	0	0	0	0	0	0	0	0	0	0	0
BnaC07G0264500ZS	0.85	1.13	1.56	1.54	1.57	1.64	1.66	1.52	0.87	0.61	1.36	1.27	1	0.53	1.02	1.18
BnaA02G0312200ZS	0.5	0.76	0.47	0.49	0.41	0.35	0.75	1.09	0.88	0.74	2.02	1.97	1.62	0.13	1.1	1.17
BnaA06G0412400ZS	1.19	1.29	1.32	1.27	1.29	1.39	1.54	1.14	1.09	0.68	0.95	0.94	1.06	0.94	2.22	1.66
BnaA09G0216200ZS	1.19	1.01	1.19	1.11	1.16	1.15	0.9	1.13	1	1.05	1.1	1.51	1.13	0.19	1.28	1.07
BnaC02G0423000ZS	0.68	1.21	1.36	1.29	1.22	1.05	0.97	1.2	1.29	1.33	2.31	2.27	2.2	0.65	2.16	1.61
BnaC07G0264800ZS	1.49	1.16	0.97	1	1.11	1.3	1.18	1.27	1.15	0.88	1.69	1.15	1.53	1.16	2.49	2.43
BnaC09G0251000ZS	1.13	1.14	1.51	1.49	1.43	1.33	0.73	1.15	1.2	1.19	1.9	2.08	2.2	0.38	1.61	1.2
BnaA02G0313600ZS	1.08	1.14	1.64	1.67	1.66	1.69	1.47	1.86	1.08	1.54	1.24	1	0.98	2.09	1.6	1.61
BnaA06G0411500ZS	0.07	0.12	0.23	0.32	0.32	0.42	0.67	0.46	0.03	0.14	0.07	0	0	0.05	0.1	0.35
BnaC02G0424600ZS	0.72	0.85	1.5	1.53	1.53	1.49	1.53	1.8	0.96	1.48	1.1	0.95	0.92	2.02	1.21	1.55
BnaC07G0265900ZS	0.07	0.18	0.32	0.29	0.37	0.16	0.16	0.39	0.33	0.35	1.21	1.01	0.95	0.48	0.87	0.43
BnaA07G0339400ZS	1.27	1.78	0.38	0.33	0.32	0.14	0.37	0.72	1.25	0.62	0.01	0.02	0.01	0.05	0.5	0.24
BnaC02G0277900ZS	1.02	1.35	0.17	0.21	0.13	0.13	0.14	0.3	0.73	0.37	0.34	0.19	0.14	0.02	0.72	0.22
BnaA02G0314300ZS	0.69	1.16	1.21	1.22	1.19	1.08	0.95	1.61	0.56	0.88	0.59	0.89	0.88	0.31	0.7	0.4
BnaC02G0425700ZS	0.89	1.29	1.13	1.12	1.11	1.1	0.89	1.48	0.6	0.31	0.41	0.41	0.5	0.08	0.29	0.26
BnaA09G0629800ZS	0	0	0	0	0	0	0	0	0.16	0.84	0	0	0	0	0	0
BnaC08G0487400ZS	0.01	0	0	0.01	0.02	0	0	0	0.13	0.08	0	0	0	0	0	0
BnaA09G0218400ZS	2.18	2.07	1.81	1.79	1.79	1.63	1.74	1.7	1.53	1.49	0.44	0.6	0.79	0.55	1.52	1.11
BnaC09G0254100ZS	2.12	1.86	1.65	1.61	1.59	1.43	1.64	1.61	1.28	1.21	0.46	0.59	0.76	0.19	1.2	0.89
BnaA06G0405800ZS	0.51	0.38	0.35	0.31	0.35	0.31	0.55	0.92	0.79	0.46	0.72	0.98	0.69	0.12	0.51	0.6
BnaC07G0273800ZS	0.53	0.5	0.52	0.54	0.55	0.62	0.47	0.85	0.77	0.55	0.43	0.64	0.45	0.07	0.49	0.4
BnaA06G0401100ZS	0	0	0	0	0	0	0	0	0	0	0	0	0	0	0	0
BnaC07G0280400ZS	0	0	0	0	0.01	0	0.05	0.17	0.08	0.07	0	0	0	0	0	0
BnaA06G0400500ZS	1.05	1.01	0.92	0.93	0.94	1.01	0.7	0.86	1.06	2.15	1.64	1.45	1.42	2.74	1.22	1.3
BnaC07G0281300ZS	1.15	1	0.8	0.83	0.77	0.9	0.67	0.86	1.01	2.12	1.75	1.47	1.36	2.73	0.96	0.98
BnaA06G0400200ZS	0.91	0.65	0.69	0.75	0.72	0.83	0.66	0.81	0.88	0.7	0.56	0.56	0.54	0.16	0.73	0.84
BnaC07G0281500ZS	0.86	0.65	0.56	0.59	0.57	0.7	0.75	0.84	0.89	0.72	0.52	0.55	0.62	0.14	0.73	0.77
BnaA06G0400100ZS	1.18	0.95	0.73	0.75	0.64	0.74	0.74	0.61	1.01	1.25	0.75	0.69	0.56	1.44	0.8	0.64
BnaA09G0222900ZS	0.13	0.2	0.41	0.39	0.44	0.47	0.38	0.32	0.23	1.35	0.54	0.44	0.28	1.55	0.26	0.47
BnaC07G0281600ZS	0.67	0.57	0.41	0.34	0.4	0.45	0.45	0.45	0.75	1.23	0.59	0.58	0.42	1.46	0.48	0.4
BnaC09G0259500ZS	0.35	0.27	0.36	0.34	0.36	0.42	0.27	0.22	0.47	1.42	0.89	0.94	0.95	2.04	0.58	0.59
BnaA09G0223100ZS	1.36	1.29	1.27	1.21	1.25	1.26	1.16	1.09	1.55	1.39	1.19	1.19	1.12	0.66	1.28	1.24
BnaC09G0259800ZS	1.07	0.97	0.85	0.88	0.89	0.88	0.78	0.71	1.26	1.1	0.83	0.91	0.89	0.24	1	0.82
BnaA09G0225800ZS	0.03	0.73	0.19	0.14	0.12	0.13	0.06	0.08	0.69	0.4	0.33	0	0	0	1.07	1.16
BnaC09G0263400ZS	1.18	1.49	0.96	0.86	0.88	1.17	0.15	0.21	0.37	0.06	0	0	0.07	0	0.39	0.77
BnaA06G0395900ZS	1.46	1.42	1.3	1.33	1.35	1.31	1.07	1.04	1.65	1.44	1.39	1.62	1.52	0.56	1.24	1.13
BnaC02G0444400ZS	1.18	1.03	0.79	0.81	0.83	0.89	1.24	1.11	1.07	0.92	0.97	1.09	0.98	0.14	1.07	1.08
BnaC07G0287500ZS	1.02	0.95	1.01	1.02	1.02	0.98	0.78	0.74	1.34	1.07	1.03	1.18	1.07	0.36	0.91	0.66
BnaA07G0057800ZS	0	0	0	0	0	0	0	0	0	0	0	0	0	0	0	0
BnaC07G0087200ZS	0	0	0	0	0	0	0	0	0	0	0	0	0	0	0	0
BnaA09G0127300ZS	0.3	0.3	0.06	0.05	0.11	0.09	0.05	0.08	0	0.02	0	0	0	0	0.08	0.03
BnaC09G0134200ZS	0.33	0.28	0.06	0.05	0.03	0.07	0.03	0.07	0.01	0	0.03	0	0.01	0	0.12	0.03
BnaA07G0055300ZS	0.56	0.67	0.6	0.63	0.57	0.63	0.6	0.65	0.74	0.75	0.72	0.73	0.63	0.67	0.58	0.85
BnaC07G0081000ZS	0.59	0.54	0.47	0.39	0.51	0.58	0.58	0.56	0.72	0.62	0.84	0.86	0.79	0.32	0.46	0.74
BnaA03G0389500ZS	1.55	1.38	1.01	1.05	1.18	1.17	1.49	1.32	1.08	1.44	1.25	0.82	1.01	0.94	2.52	1.9
BnaC03G0482200ZS	1.5	1.35	1.13	1.1	1.27	1.28	1.29	1.31	1.22	1.63	1.82	1.37	1.51	0.71	2.23	1.79
BnaA07G0054600ZS	0.15	0.03	0.03	0.02	0.02	0.04	0.02	0.1	0.37	0.11	0.04	0	0	0	0.01	0.01
BnaC07G0080200ZS	0.17	0.15	0	0	0.01	0.01	0.03	0.06	0.23	0.09	0	0	0	0	0.03	0
BnaA07G0054300ZS	1.14	1.12	1.02	1	1.08	1.13	0.92	0.92	1.23	1.11	1.25	1.33	1.3	0.35	0.91	1.08
BnaC07G0079900ZS	1.1	1.22	1.62	1.6	1.57	1.44	2.05	1.99	1.08	0.95	1.09	1.03	1.1	0.75	1.44	1.19
BnaA05G0440200ZS	1.09	0.91	0.65	0.62	0.68	0.69	0.77	0.86	1.24	0.91	0.81	0.95	0.72	0.2	0.84	0.88
BnaC05G0501900ZS	1.09	0.9	0.68	0.69	0.73	0.81	0.79	0.82	1.21	0.87	0.92	1.02	0.79	0.22	0.86	0.97
BnaA09G0104200ZS	0.03	0.16	0	0	0	0	0	0	0	0	0	0	0	0	0	0
BnaC09G0105000ZS	0.11	0.1	0.08	0.09	0.17	0.09	0.3	0.05	0.36	0.15	0.03	0.07	0.01	0	0.16	0.05
BnaA07G0048600ZS	0	0	0	0	0	0	0	0	0	0	0	0	0	0	0	0
BnaC07G0077700ZS	0	0	0	0	0	0	0	0	0	0	0	0	0	0	0	0
BnaA07G0047900ZS	0.78	0.85	0.83	0.82	0.92	1.22	0.72	0.53	0.71	0.58	1.01	0.93	0.83	0.18	1.18	1.45
BnaC07G0077400ZS	0.86	0.91	0.82	0.85	0.93	1.28	0.78	0.54	0.65	0.49	0.93	0.78	0.68	0.02	1.38	1.54
BnaA08G0040600ZS	0	0	0	0	0	0	0	0	0	0	0	0	0	0	0	0
BnaC08G0050000ZS	0	0	0	0	0	0	0	0	0	0	0	0	0	0	0	0
BnaA03G0393100ZS	0	0	0	0	0	0	0	0.4	0.2	0	0	0	0	0	0	0
BnaC03G0486700ZS	0	0	0	0	0	0	0	0.1	0	0	0	0	0	0	0	0
BnaA07G0046700ZS	0.93	0.86	0.63	0.57	0.6	0.69	0.57	0.64	0.74	0.8	0.95	1.1	1.02	0.57	0.83	0.95
BnaC07G0076900ZS	0.91	0.83	0.66	0.66	0.65	0.66	0.54	0.57	0.66	0.76	0.79	0.85	0.75	0.59	0.8	0.95
BnaA03G0393500ZS	1.07	1.26	0.96	0.97	1.09	1.4	1.27	1.23	0.81	1.41	1.8	0.66	0.67	1.41	1.52	2.13
BnaA09G0105100ZS	1.17	1.31	1.02	1.06	1.16	1.5	1.83	1.52	1.11	1.27	2.06	1.27	1.24	0.57	1.71	2
BnaC09G0106200ZS	1.01	1.18	1.15	1.2	1.24	1.57	1.69	1.45	1.09	1.19	2.04	1.27	1.25	0.42	1.28	1.8
BnaC03G0487200ZS	1.08	1.27	1.19	1.14	1.27	1.46	1.43	1.39	0.95	1.29	1.77	0.86	0.93	1.19	1.53	2.04
BnaC03G0491800ZS	0.11	0.05	0.22	0.28	0.16	0.32	0	0.01	0.09	2.34	1.68	1.28	1.04	2.92	0.36	0.11
BnaA03G0396300ZS	1.61	1.32	1.56	1.67	1.6	1.91	1.26	1.87	0.47	0.22	1.86	2.08	1.73	0.1	2.38	2.15
BnaC03G0491900ZS	0.85	0.61	0.18	0.27	0.35	0.73	0.17	0.59	0.48	0.16	2.26	2.22	2.21	0.53	2.06	1.62
BnaA07G0036100ZS	0.68	0.9	1.51	1.47	1.47	1.11	1.03	1.19	1.15	0.76	0.92	0.67	0.9	0.03	1.59	0.26
BnaA09G0109400ZS	0.5	0.51	1.44	1.39	1.4	0.67	0.72	0.67	1.29	0.77	0.55	0.78	0.6	0.08	1.4	0.23
BnaC07G0063300ZS	0.23	0.24	0.74	0.63	0.62	0.41	0.89	1.03	0.8	0.4	0.56	0.32	0.49	0.05	0.77	0.11
BnaC09G0111400ZS	0.45	0.7	1.42	1.35	1.35	0.54	0.7	0.63	1.28	0.97	0.47	0.61	0.49	0.04	1.35	0.08
BnaA03G0401800ZS	0	0	0	0	0	0	0	0	0	0.39	0.11	0.06	0.01	0.66	0	0
BnaC03G0501500ZS	0	0	0	0	0	0	0	0	0	0.21	0.07	0.1	0.03	0.3	0	0
BnaA07G0030000ZS	0.25	0.34	0.27	0.35	0.34	0.26	0.28	0.17	0.82	0.17	0.19	0.33	0.12	0.03	0.52	0.51
BnaA09G0111000ZS	0.93	0.69	0.4	0.45	0.49	0.49	0.53	0.47	1.06	0.6	0.44	0.61	0.25	0.15	0.71	0.76
BnaC09G0113300ZS	1	0.76	0.57	0.56	0.6	0.58	0.57	0.63	1.26	0.7	0.37	0.65	0.27	0.07	0.8	0.92
BnaC07G0054900ZS	0.28	0.19	0.06	0.04	0.02	0.07	0.06	0.15	0.29	0.29	0.01	0.04	0.01	0.29	0.14	0.17
BnaA09G0112000ZS	0.59	0.52	0.39	0.41	0.45	0.53	0.25	0.4	0.5	0.46	0.36	0.42	0.35	0.26	0.36	0.49
BnaA06G0314000ZS	0	0	0	0	0	0	0	0	0.12	0.2	0	0	0	0.24	0	0
BnaA09G0115200ZS	0	0	0	0	0	0	0	0	0	0.36	0	0	0	0.3	0	0
BnaC09G0118400ZS	0	0	0	0	0	0	0	0	0	0.26	0	0	0	0.04	0	0
BnaA07G0022100ZS	0	0	0.02	0.14	0.06	0.01	0.02	0	0.23	0.12	0	0	0.01	0	0	0.05
BnaC07G0043300ZS	0	0	0	0	0	0	0	0	0	0	0	0	0	0	0	0
BnaA07G0021700ZS	1.49	1.49	1.83	1.83	1.88	1.86	1.88	1.74	1.3	1.36	0.83	0.88	0.8	0.65	1.05	0.88
BnaA09G0115600ZS	2.43	2.39	2.02	2.02	2.08	2.24	1.91	1.97	1.9	2.2	1.79	1.77	1.75	0.97	1.8	1.69
BnaC09G0119000ZS	2.18	2.17	1.89	1.88	1.93	2	2.06	1.95	1.73	1.85	1.83	1.87	1.75	0.71	1.49	1.44
BnaA09G0117500ZS	1.49	1.38	1.2	1.2	1.21	1.14	0.89	1.22	1.7	1.44	1.25	1.44	1.18	0.95	1.34	1.61
BnaC09G0121800ZS	1.52	1.42	1.2	1.2	1.21	1.16	0.88	1.16	1.71	1.47	1.54	1.7	1.44	0.86	1.32	1.56
BnaA07G0017800ZS	0.01	0.05	0.06	0.04	0.04	0.04	0.48	0.43	0.22	0.03	0.01	0	0	0	0.05	0.01
BnaA09G0118200ZS	0	0.09	0	0.05	0.03	0.03	0.08	0.13	0.06	0.01	0	0	0	0	0.03	0.05
BnaC07G0037300ZS	0	0.01	0.08	0.07	0.05	0.02	0.6	0.41	0.29	0.08	0	0.02	0	0.06	0.02	0.02
BnaC09G0122900ZS	0.01	0.11	0.01	0.06	0.03	0.02	0.13	0.09	0.06	0.01	0	0	0	0	0	0.04
BnaC08G0462300ZS	1.56	1.39	1.07	1.08	1.1	1.1	1.1	1.14	1.54	1.23	0.9	0.96	0.93	0.41	1.21	0.97
BnaA09G0608600ZS	1.55	1.28	0.86	0.76	0.82	0.79	1.08	1.12	1.53	1.18	0.98	1.15	1.04	0.38	1.18	0.66
BnaA07G0010000ZS	0.54	0.43	0.29	0.3	0.29	0.22	0.64	0.45	0.9	0.67	0.24	0.33	0.28	0.03	1.06	0.46
BnaA09G0122500ZS	0	0.05	0	0.07	0	0	0	0.17	0.57	0.06	0.11	0.02	0	0	0.03	0.03
BnaC07G0023000ZS	0.4	0.47	0.19	0.13	0.13	0.11	0.35	0.59	0.76	0.41	0.23	0.21	0.27	0.08	1.06	1.02
BnaC09G0128400ZS	0	0	0.05	0	0.06	0.02	0	0	0.11	1.47	0.86	0.49	0.32	1.98	0	0.05
BnaA07G0008900ZS	0	0	0	0	0	0	0	0	0	1.35	0	0	0	0.04	0	0
BnaA09G0126000ZS	0	0.02	0	0	0	0	0	0.01	0	0.79	0	0	0	0.71	0	0
BnaC09G0132400ZS	0	0	0	0	0	0	0	0	0	1.21	0.21	0.03	0.05	0.97	0	0
BnaA09G0126200ZS	0.98	0.76	0.46	0.52	0.56	0.47	1.12	0.98	1.04	0.69	0.45	0.55	0.41	0.1	0.86	0.67
BnaA03G0119400ZS	0.23	0.35	0.12	0.12	0.1	0.03	0.84	0.77	1.24	0.42	0	0	0.03	0.01	0.14	0.01
BnaC03G0138300ZS	0.72	0.68	0.44	0.51	0.23	0.02	1.12	1.03	1.43	0.76	0.04	0.02	0	0	0.68	0
BnaA04G0138500ZS	0.01	0	0	0	0	0	0	0	0	0.1	0	0	0.01	0.03	0	0
BnaA09G0599100ZS	0	0	0	0	0	0	0	0	0.02	0	0	0	0	0	0	0
BnaC08G0452900ZS	0.18	0	0	0	0	0	0.01	0.07	0	0.03	0	0	0	0	0	0
BnaA04G0139200ZS	0	0.06	0.59	0.57	0.51	0.21	0.01	0	0.01	0.61	0.03	0	0.01	0.11	0.06	0
BnaC04G0429700ZS	0	0	0.01	0	0.01	0	0	0.01	0.03	0.5	0.05	0.03	0.02	0.14	0	0
BnaA04G0140100ZS	1.48	1.17	0.53	0.51	0.44	0.47	0.28	0.54	0.68	0.32	1.61	1.61	1.56	0.19	1.92	1.63
BnaC08G0450300ZS	2.39	1.83	0.94	0.98	0.85	1.21	0.76	1.1	1.88	1.2	2.4	2	2.08	0.15	2.45	2.19
BnaA09G0596800ZS	0.54	0.52	0.56	0.56	0.57	0.66	0.64	0.73	0.67	0.45	0.4	0.39	0.25	0.09	0.65	0.73
BnaC08G0449600ZS	0.87	0.84	0.82	0.82	0.85	0.85	0.92	1.01	0.9	0.74	0.75	0.68	0.53	0.06	0.83	0.87
BnaA06G0428000ZS	0.66	0.65	0.3	0.29	0.32	0.27	0.49	0.63	1.05	0.76	0.29	0.57	0.21	0.03	0.56	0.43
BnaC03G0674900ZS	0.91	0.95	0.64	0.68	0.72	0.64	0.72	0.98	1.5	1.11	0.16	0.32	0.18	0.12	0.86	0.66
BnaA04G0141500ZS	1.7	1.55	1.57	1.58	1.56	1.52	1.71	1.55	1.86	1.9	1.95	1.96	2.04	0.74	1.7	1.58
BnaA09G0596100ZS	1.93	1.79	1.62	1.64	1.67	1.64	1.77	1.67	1.94	1.95	1.87	1.95	2.11	0.69	1.84	1.67
BnaC08G0448900ZS	1.83	1.67	1.58	1.57	1.56	1.55	1.56	1.52	1.94	1.96	1.77	1.84	1.98	0.78	1.74	1.6
BnaC04G0431900ZS	1.77	1.74	1.65	1.68	1.71	1.66	1.77	1.62	1.86	1.85	1.99	1.97	2.02	0.76	1.76	1.74
BnaA04G0143400ZS	1.43	1.44	0.75	0.73	0.71	0.47	0.93	1.26	1.06	1.1	0.96	0.89	0.98	0.02	1.17	0.23
BnaA09G0594500ZS	1.54	1.45	0.97	0.97	0.98	0.98	1.03	1.24	0.96	1.01	0.79	0.75	0.9	0.09	1.34	0.83
BnaC08G0447200ZS	1.62	1.49	1.16	1.17	1.18	1.16	1.1	1.31	1.07	1.15	0.94	0.91	1.03	0.17	1.42	0.93
BnaC04G0433800ZS	1.28	1.22	0.69	0.63	0.64	0.3	0.91	1.18	0.99	0.97	0.63	0.59	0.68	0	1.07	0.13
BnaC04G0436600ZS	1.03	0.91	0.84	0.84	0.84	0.9	0.77	0.72	1.03	0.79	0.66	0.78	0.75	0.37	0.79	0.8
BnaA04G0145300ZS	0.94	0.86	0.73	0.67	0.71	0.69	0.73	0.81	1.14	0.78	0.64	0.61	0.6	0.16	0.81	0.88
BnaA04G0147200ZS	1.52	1.3	1.41	1.38	1.41	1.42	1.41	1.29	0.44	0.23	0.48	0.44	0.43	0	0.04	0
BnaA09G0591400ZS	1.52	1.36	1.25	1.23	1.25	1.35	1.23	1.14	0.42	0.26	0.24	0.17	0.88	0	0.21	0.37
BnaC04G0438900ZS	1.73	1.6	1.76	1.76	1.79	1.77	1.91	1.86	0.54	0.64	0.67	0.45	0.44	0.03	1.03	1.25
BnaC08G0443200ZS	1.43	1.26	0.8	0.75	0.79	1.08	0.78	0.7	0.48	0.36	0.07	0.3	0.65	0	0.03	0
BnaA03G0241000ZS	0.81	0.82	0.51	0.52	0.51	0.63	0.44	0.47	1.06	0.57	0.19	0.21	0.27	0.03	0.45	0.29
BnaA09G0589000ZS	0	0	0	0	0	0	0	0	0	1.21	0.02	0.01	0.01	0.26	0	0
BnaC08G0440400ZS	0	0	0	0	0	0	0	0	0	1.05	0	0	0	0.1	0	0
BnaA04G0152100ZS	1.42	1.33	1.06	1.05	1.09	1.23	1.27	1.29	1.29	1.37	1.34	1.4	1.27	1.52	1.22	1.26
BnaA09G0588800ZS	1.35	1.3	1.05	1.04	1.06	1.08	1.25	1.37	1.3	1.48	1.34	1.34	1.21	1.74	1.12	1.17
BnaC04G0444500ZS	1.34	1.22	1.01	1	1	1.15	1.12	1.25	1.23	1.37	1.34	1.32	1.29	1.71	1.09	1.28
BnaC08G0440200ZS	1.37	1.35	1.14	1.19	1.13	1.22	1.28	1.36	1.31	1.55	1.43	1.42	1.38	1.85	1.17	1.27
BnaA09G0588000ZS	0.98	0.94	0.68	0.65	0.68	0.8	0.54	0.75	0.99	0.89	0.83	0.94	0.88	0.77	0.75	0.84
BnaC08G0439500ZS	0.92	0.93	0.76	0.75	0.76	0.88	0.68	0.83	1.02	0.86	1.02	1.08	1.08	0.64	0.81	0.89
BnaA04G0153700ZS	1.86	1.86	0.59	0.52	0.53	0.39	0.44	0.59	0.8	0.46	0.11	0.1	0.08	0.02	1.04	0.14
BnaA09G0586900ZS	0.64	0.64	0.09	0.03	0.08	0.01	0.08	0.09	0.32	0.18	0.01	0.03	0.01	0.01	0.18	0
BnaC04G0446800ZS	1.8	1.82	0.35	0.38	0.39	0.33	0.29	0.6	0.7	0.48	0.11	0.09	0.06	0	0.99	0.32
BnaC08G0438400ZS	0.8	0.67	0.26	0.25	0.21	0.1	0.17	0.38	0.69	0.48	0.01	0	0.06	0.02	0.64	0.03
BnaA09G0421700ZS	0	0	0	0	0	0	0	0	0	0	0	0	0	0	0	0
BnaA09G0526600ZS	0	0	0	0	0	0	0	0.01	0	0	0	0	0	0	0	0
BnaA04G0154400ZS	1.46	1.42	1.36	1.35	1.38	1.5	1.12	1.38	1.28	1.35	1.47	1.71	1.59	1.26	1.28	1.24
BnaC04G0447500ZS	1.42	1.34	1.08	1.07	1.09	1.14	0.85	1.11	1.15	1.41	1.58	1.74	1.66	1.55	1.03	1.09
BnaA09G0581100ZS	0.29	0.4	0.57	0.66	0.65	0.82	0.46	0.47	0.43	0.46	2.01	1.78	1.93	0.06	0.4	1.13
BnaC08G0433700ZS	0.2	0.01	0.25	0.2	0.23	0.5	0.16	0.17	0.5	0.63	2.39	2.11	2.36	1.06	0	0.51
BnaA04G0166400ZS	0.71	0.65	0.56	0.52	0.55	0.54	0.59	0.58	0.75	0.57	0.81	0.91	0.81	0.32	0.68	0.68
BnaC04G0463400ZS	0.8	0.76	0.6	0.54	0.61	0.71	0.57	0.57	0.97	0.71	1	1.06	0.95	0.24	0.63	0.7
BnaA06G0360200ZS	0	0	0	0	0	0	0	0	0	0	0	0	0	0	0	0
BnaC07G0332800ZS	0	0	0	0	0	0	0	0	0	0	0	0	0	0	0	0
BnaA09G0573800ZS	0	0	0.02	0.03	0.01	0.02	0	0	0.22	1.35	0.68	0.35	0.28	1.84	0	0
BnaC08G0425100ZS	0	0	0.03	0.04	0.01	0.05	0	0	0.26	1.4	0.8	0.51	0.31	1.96	0	0
BnaA03G0134000ZS	0.59	0.59	0.84	0.77	0.8	0.77	0.96	0.98	0.71	0.66	1.04	0.94	0.85	0.06	0.79	0.74
BnaC03G0155700ZS	0.8	0.76	1.12	1.11	1.11	0.94	1.19	1.26	0.91	0.81	0.59	0.52	0.49	0.07	1.02	0.83
BnaC04G0469200ZS	0.33	0.39	0.28	0.32	0.28	0.13	0.76	0.74	0.62	0.4	0.31	0.09	0.16	0	0.77	0.32
BnaC03G0526200ZS	0	0	0	0	0	0	0	0	0	0	0	0	0.02	0.03	0	0
BnaC08G0264400ZS	0	0.01	0	0	0	0	0	0	0	0	0	0	0	0	0	0
BnaA03G0272100ZS	0.91	0.81	0.56	0.52	0.61	0.68	0.36	0.57	0.78	0.85	0.7	0.77	0.72	0.77	0.53	0.66
BnaC03G0327100ZS	0.74	0.66	0.44	0.43	0.5	0.49	0.26	0.37	0.85	0.82	0.63	0.55	0.5	0.68	0.43	0.42
BnaA04G0172100ZS	1.14	1.06	1.09	1.08	1.11	1.23	0.86	0.97	0.76	0.79	1.08	1.2	1.17	0.09	1.24	1.29
BnaA09G0572800ZS	1.18	1.01	0.76	0.81	0.78	0.88	0.88	0.97	0.86	0.86	1.22	1.29	1.33	0.54	1.24	1.23
BnaC08G0423900ZS	1.21	1.18	1.01	1.02	1.05	1.12	0.88	1.01	0.93	0.88	1.18	1.25	1.33	0.64	1.22	1.3
BnaC04G0470000ZS	0.99	0.82	0.65	0.65	0.67	0.84	0.43	0.53	0.64	0.59	0.51	0.59	0.42	0.01	0.71	0.88
BnaA04G0174300ZS	0	0	0	0.02	0	0	0	0	0.03	1.18	0.43	0.15	0.16	1.3	0	0.01
BnaA09G0571000ZS	0	0	0.01	0.02	0	0	0	0	0	1.41	0.67	0.39	0.25	1.69	0	0
BnaC04G0472300ZS	0	0	0	0	0	0	0	0	0.02	0.81	0.28	0.1	0.08	0.91	0	0
BnaC08G0421400ZS	0	0	0	0.01	0	0.01	0	0	0.02	1.28	0.55	0.24	0.18	1.48	0	0
BnaA07G0152100ZS	1.3	1.21	1.11	1.14	1.11	1.19	1.23	1.17	1.28	1.06	1.07	1.06	1.05	0.13	1.52	1.31
BnaA07G0151400ZS	1.2	1.06	0.86	0.84	0.9	0.88	0.9	0.95	0.95	1.21	1.79	1.54	1.56	1.3	1.1	1.35
BnaC04G0211300ZS	1.24	1.16	0.96	0.96	0.97	1.02	1.15	1.14	1	1.19	1.7	1.5	1.5	0.85	1.01	1.22
BnaA03G0235700ZS	0.2	0.06	0.28	0.43	0.33	0.47	0.34	0.61	0.05	0.1	0.4	0.21	0.15	0	0.59	0.09
BnaA04G0175400ZS	0.89	0.9	0.22	0.26	0.25	1.31	0.69	1.57	0.61	0.74	1.96	1.93	1.93	0.16	2.02	2.04
BnaC03G0278500ZS	0.66	0.41	0.46	0.37	0.45	0.46	0.33	0.55	0.11	0.28	1.03	0.9	0.53	0.01	0.75	0.36
BnaC04G0473700ZS	0.9	1.2	0.3	0.41	0.36	1.26	0.64	1.56	0.8	0.65	2.34	2.22	2.24	0.3	2.12	2.2
BnaA07G0154600ZS	0.1	0.06	0.97	0.92	0.87	0.79	1.33	1.5	1.71	0.67	0.1	0.01	0	0	0.43	0
BnaC04G0207500ZS	0.33	0.54	1.33	1.32	1.23	1.39	1.4	1.86	1.76	0.84	0.02	0	0.04	0	1.7	0.02
BnaA04G0178700ZS	0.97	0.88	0.65	0.67	0.67	0.67	0.68	0.76	0.76	0.69	0.47	0.47	0.53	0.13	0.72	0.7
BnaA07G0154900ZS	1.26	1.2	1.04	1.05	1.07	1.08	0.81	0.93	1.1	1.15	1.11	1.13	1.18	0.31	1.03	1.08
BnaC04G0206900ZS	1.17	1.09	0.87	0.86	0.9	0.98	0.57	0.7	1.13	1.01	0.92	0.93	0.91	0.21	0.93	0.85
BnaC04G0477800ZS	1.25	1.12	0.77	0.72	0.77	0.74	0.74	0.9	1.04	0.91	0.61	0.45	0.61	0.02	0.99	0.75
BnaA03G0233400ZS	0.08	0	0.01	0	0	0	0	0.02	0	0.06	0	0	0.04	0.01	0	0
BnaC04G0478300ZS	0.89	0	0	0	0	0	0	0.66	0	0.05	0	0	0	0	0	0
BnaA07G0155500ZS	0	0	0	0	0	0	0	0.06	0	0	0	0	0	0	0	0
BnaC03G0275900ZS	0.23	0	0	0	0.02	0	0	0.15	0	0.03	0	0	0	0	0	0
BnaA03G0231000ZS	0	0	0	0	0	0	0.01	0.01	0	0.21	0	0	0	0	0	0
BnaA04G0184700ZS	0	0	0	0	0.01	0	0	0	0.41	1.05	0	0.14	0	0.11	0	0
BnaC03G0272600ZS	0	0	0	0	0	0	0	0	0.06	0	0	0	0	0	0	0
BnaC04G0485700ZS	0	0	0	0	0	0	0	0	0.43	0.97	0	0.19	0.09	0.03	0	0
BnaA04G0190800ZS	0.29	0.18	0.05	0.08	0.16	0.18	0.34	0.28	0.38	0.43	0.35	0.48	0.55	0	0.3	0.45
BnaA05G0139900ZS	1.41	1.16	0.96	0.88	0.9	0.81	1.24	1.19	1.75	1.43	1.02	1.24	0.98	0.19	1.27	1.12
BnaA05G0137600ZS	1.38	1.14	0.33	0.34	0.35	0.34	0.51	0.8	0.85	1.6	0.35	0.62	0.68	0.29	0.77	0.12
BnaA03G0146800ZS	0	0	0	0	0	0	0	0.05	0	0	0.02	0	0	0	0	0
BnaA05G0132300ZS	1.51	1.36	0.93	0.94	0.82	0.82	1.61	1.56	1.59	1.31	0.82	0.95	1.08	0.18	1.29	0.87
BnaC03G0171000ZS	0	0	0	0	0	0	0	0	0.19	0	0	0	0	0	0	0
BnaC04G0175000ZS	1.68	1.55	1.29	1.33	1.29	1.28	1.63	1.68	1.59	1.43	1	1.02	1.06	0.24	1.48	1.37
BnaA04G0203000ZS	0	0	0	0	0.01	0.03	0	0	1.57	0	0.01	0	0	0	0	0
BnaA05G0127900ZS	0	0	0	0	0	0	0	0	0.48	0	0	0	0	0	0	0
BnaC04G0166600ZS	0	0.01	0	0	0	0	0	0	0.59	0.06	0	0	0	0.04	0	0
BnaC04G0509000ZS	0	0	0	0	0	0.01	0	0	1.5	0	0	0	0	0	0	0
BnaA04G0203100ZS	0.01	0.05	0	0.01	0	0	0	0.03	1.66	0.01	0.03	0	0	0	0.11	0
BnaA05G0128000ZS	0.39	0.05	0.01	0	0.01	0.05	0.08	0.09	1.5	0.15	0.03	0.01	0.01	0.01	0.16	0
BnaC04G0166800ZS	0.3	0.01	0.04	0.05	0.05	0.1	0.3	0.29	1.62	0.41	0.05	0.06	0.06	0.14	0.2	0
BnaC04G0509100ZS	0.29	0.27	0.01	0.02	0.03	0	0	0.06	1.78	0.01	0	0	0	0	0.11	0.01
BnaA04G0204200ZS	1.16	0.99	0.73	0.72	0.74	0.84	1.02	1.05	1.05	0.88	0.92	0.9	0.78	0.81	1.13	1.18
BnaC04G0510200ZS	0.99	0.78	0.75	0.76	0.78	0.75	0.8	0.82	0.81	0.63	0.51	0.51	0.43	0	0.93	0.94
BnaA05G0122300ZS	0.94	0.84	0.55	0.53	0.62	0.61	0.78	0.86	0.99	0.75	0.58	0.62	0.52	0.19	0.83	0.84
BnaC03G0178900ZS	0.83	0.65	0.48	0.48	0.54	0.64	0.48	0.46	0.6	0.57	0.68	0.64	0.6	0.15	0.7	0.66
BnaA03G0155400ZS	1.05	1.02	0.25	0.2	0.24	0.14	0.65	0.69	0.88	0.43	0.06	0	0.02	0	0.73	0
BnaA05G0116000ZS	1.13	1.76	0.4	0.37	0.28	0.06	0.3	0.33	0.69	0.5	0.05	0.09	0.07	0	0.96	0.05
BnaC03G0181200ZS	0.98	0.72	0.16	0.04	0.08	0.03	0.34	0.49	0.92	0.75	0.03	0	0	0	0.33	0
BnaC04G0147800ZS	0.66	1.16	0.24	0.32	0.16	0.11	0.27	0.23	0.8	0.39	0.24	0.93	0.73	0.06	0.72	0.33
BnaA05G0109500ZS	0	0	0	0	0.02	0.03	0	0	0.02	0	0	0	0.01	0	0	0
BnaC04G0136900ZS	0.01	0	0	0	0	0	0	0	0.06	0.13	0	0	0	0	0	0.01
BnaA03G0160900ZS	0.13	0.33	1.13	1.13	1.23	0.86	2.14	1.27	0.86	0.83	0.41	0.08	0.09	0.01	1.34	0.25
BnaA04G0214400ZS	0.81	0.62	1	1.04	1.11	1.23	1.1	0.67	0.86	0.98	2.44	2.33	2.41	0.9	1.82	1.27
BnaC03G0187300ZS	0.98	0.82	1.41	1.38	1.52	1.21	2.04	1.33	1.1	1.55	0.44	0.7	0.4	0.1	1.74	0.23
BnaC04G0135700ZS	1.25	1.43	1.2	1.19	1.22	1.4	1.67	1.09	1.72	1.1	1.58	1.45	1.67	0.76	1.04	0.97
BnaC04G0525300ZS	1.97	1.41	1.6	1.62	1.67	1.76	2.14	1.62	1.98	1.75	2.59	2.68	2.7	1.38	2.3	1.64
BnaA03G0161500ZS	0	0	0	0	0	0	0	0	0.04	0	0.27	0.03	0.07	0.16	0	0
BnaC03G0188100ZS	0	0	0	0	0	0	0	0	0.11	0.24	0	0	0	0.19	0	0
BnaA04G0216600ZS	0	0	0	0.05	0	0.01	0	0	0	1.59	0.19	0.1	0.05	1.17	0	0
BnaC04G0527700ZS	0	0	0.02	0	0	0	0.01	0.01	0.01	1.6	0.17	0.1	0.04	1.15	0	0
BnaA04G0217500ZS	0	0.01	0.05	0.03	0.04	0.04	0.09	0	0	0	0	0	0	0	0.11	0.09
BnaC04G0528800ZS	0	0	0	0	0	0	0.01	0.05	0.28	2.23	0.38	0.11	0.79	0	0.03	0
BnaA05G0137500ZS	0	0	0	0	0	0	0	0	0	0	0	0	0	0	0	0
BnaA05G0105100ZS	0.98	0.93	0.76	0.76	0.79	0.89	0.58	0.64	0.8	0.88	0.95	1	0.95	0.86	0.71	0.86
BnaC04G0131000ZS	1.1	1.02	0.85	0.86	0.85	0.95	0.65	0.69	0.87	0.94	0.97	1.07	1.04	0.84	0.76	0.94
BnaC04G0530100ZS	1.14	1.13	0.27	0.29	0.31	0.37	0.41	0.54	1.03	0.63	0.13	0.38	0.29	0.04	0.35	0.38
BnaA05G0104800ZS	1.76	1.64	0.61	0.66	0.71	0.84	0.76	0.85	1.23	0.99	0.38	0.59	0.56	0.08	0.84	0.84
BnaC04G0130700ZS	1.52	1.46	0.62	0.6	0.63	0.76	0.62	0.75	1.2	0.94	0.24	0.59	0.48	0.13	0.8	0.79
BnaC04G0129300ZS	0.87	1.17	0.13	0.16	0.23	0.16	0.28	0.23	0.15	0.57	0.05	0.1	0.02	0.02	0.53	0.18
BnaA04G0220900ZS	0	0	0.01	0	0	0	0	0	0	0	0	0	0	0	0	0
BnaA05G0100300ZS	0.12	0.36	0.05	0.11	0.03	0.24	0.02	0.07	0.04	0.12	0.58	0.12	0.14	0.26	0.8	1.6
BnaC04G0533600ZS	0.43	0.02	0.06	0.05	0.02	0.13	0.01	0.02	0	0	0	0	0	0	0.01	0
BnaA03G0166300ZS	1.01	0.88	1.09	1.11	1.1	1.19	1.09	0.89	1.09	1.12	1.51	1.83	1.62	0.41	0.92	1.22
BnaC04G0121700ZS	1.09	1.32	1.73	1.71	1.74	1.51	1.47	1.97	1.16	0.92	0.87	1.21	0.9	0.21	1.25	0.89
BnaA05G0098800ZS	0.9	1.25	1.77	1.76	1.74	1.5	1.59	1.87	1.03	0.81	0.77	0.98	0.75	0.26	1.24	0.97
BnaA05G0097300ZS	0.88	0.82	0.25	0.2	0.21	0.02	0.1	0.69	0.33	0.26	1.25	1.38	1.42	0	0.61	0.43
BnaC04G0536000ZS	1.21	1.65	0.36	0.33	0.27	0.04	0.21	1	0.73	0.59	0.23	0.46	0.19	0.02	1.82	1.37
BnaA05G0096300ZS	0.16	0.2	0.07	0.08	0.08	0.02	0.22	0.1	0.43	0.17	0	0	0	0	0.19	0.08
BnaC04G0536900ZS	0.2	0.5	0.37	0.28	0.31	0.05	0.04	0.05	0.03	0.01	0	0	0	0	0.71	0.41
BnaA03G0170200ZS	1.3	1.24	0.82	0.81	0.84	0.87	0.76	0.9	0.94	1.08	0.85	0.92	0.89	1.01	1	0.78
BnaC03G0197300ZS	1.38	1.32	0.95	0.95	0.97	0.96	0.87	0.99	1.04	1.16	0.86	0.98	0.89	1.24	1.1	0.93
BnaA04G0227700ZS	0	0.01	0.01	0.01	0	0	0	0	0.01	0	0	0	0	0	0	0
BnaC04G0541900ZS	0	0.01	0	0	0	0	0	0	0.08	0.01	0	0	0	0	0	0
BnaC04G0106700ZS	0.03	0.03	0	0	0	0	0.01	0.03	0.01	0	0.02	0	0.01	0	0	0
BnaA03G0170600ZS	1.87	1.87	1.71	1.69	1.71	1.78	1.57	1.43	1.57	1.69	1.74	1.88	1.92	1.53	1.43	1.44
BnaC03G0197800ZS	1.84	1.75	1.53	1.53	1.58	1.62	1.35	1.38	1.35	1.58	1.71	1.85	1.89	1.51	1.5	1.61
BnaA05G0089500ZS	1.16	1.12	0.96	0.99	0.99	1.1	0.65	0.72	0.95	1.02	1.16	1.27	1.25	1.09	0.91	1.09
BnaA03G0172700ZS	1.81	1.61	1.51	1.49	1.48	1.47	1.02	1.05	0.84	1.02	1.73	1.77	1.82	0.61	1.42	1.42
BnaA04G0230500ZS	2.37	2.15	1.82	1.84	1.84	2.05	0.91	0.99	0.95	1	2.32	1.99	2.27	0.16	1.71	2.07
BnaA05G0089900ZS	1.82	1.87	1.95	1.93	1.94	1.94	1.46	1.14	0.69	1.11	1.98	1.81	1.9	0.98	1.44	1.73
BnaC03G0200500ZS	1.82	1.62	1.52	1.57	1.63	1.5	1.45	1.24	0.82	1.03	1.6	1.68	1.71	0.59	1.46	1.42
BnaA04G0230400ZS	2.28	2	1.62	1.62	1.64	1.87	1.05	0.92	0.75	0.78	2.12	1.85	2.02	0.09	1.58	1.85
BnaA09G0494500ZS	0	0	0	0.02	0.06	0	0.18	0.1	0.12	0.27	0.46	0.02	0.09	0	0.22	0
BnaC08G0333100ZS	0.03	0	0	0.03	0	0	0.13	0.19	0.21	0.1	0.06	0	0	0	0.15	0
BnaA04G0239700ZS	0.02	0	0.03	0.27	0.28	0.01	0	0.01	0.19	1.4	0.57	0.35	1.05	1.67	0	0
BnaC04G0554800ZS	0.07	0.05	0.05	0.26	0.32	0.07	0.03	0.02	0.18	1.37	0.56	0.27	0.83	2.03	0.02	0.06
BnaA05G0073200ZS	0.03	0.14	0	0	0	0.01	0.01	0	0	0	0	0	0	0	0.01	0.12
BnaA04G0246100ZS	0.98	0.84	0.48	0.47	0.56	0.46	0.53	0.67	1	0.87	0.5	0.4	0.64	0.02	1.19	0.82
BnaC04G0560900ZS	0.99	0.86	0.61	0.66	0.65	0.62	0.85	0.89	1.2	0.96	0.86	0.84	1.23	0.06	1.02	0.97
BnaA03G0184800ZS	0	0	0.02	0	0.02	0.02	0	0	0	0	0.04	0	0.12	0.38	0	0
BnaC03G0216800ZS	0.7	0.53	0.24	0.12	0.28	0.37	0.13	0.1	0.44	0.69	0.63	0.81	0.82	0.74	0.06	0.13
BnaA03G0185600ZS	0.77	0.66	0.49	0.48	0.54	0.55	0.77	0.68	1.18	0.76	0.29	0.18	0.14	0.8	0.58	0.73
BnaC03G0217700ZS	0.74	0.67	0.54	0.55	0.59	0.62	0.8	0.78	1.29	0.84	0.69	0.76	0.66	0.66	0.73	0.89
BnaA05G0070500ZS	1.1	0.96	0.89	0.91	0.96	0.99	1.04	1.08	1.14	1.08	1.17	1.24	1.12	0.83	1.08	1.42
BnaA03G0190200ZS	0.57	0.69	0.68	0.74	0.72	0.65	0.93	0.76	1.45	0.5	0.87	0.79	0.97	0.17	0.72	0.57
BnaC03G0223700ZS	0.93	1.05	1.27	1.28	1.28	1.2	1.44	1.36	1.44	0.69	0.77	0.85	1.16	0.41	1.33	1.14
BnaA05G0063500ZS	0.33	0.37	0.75	0.83	0.88	0.49	1.15	0.42	1.07	1.64	1.25	1.31	1.75	0.54	0.27	0.08
BnaC04G0069800ZS	2.06	0.87	1.11	1.18	1.19	0.89	1.62	0.65	1.06	1.74	1.11	0.97	1.35	0.45	0.42	0.19
BnaA03G0195000ZS	1.78	1.82	1.21	1.17	1.17	1.05	1.18	1.46	1.42	1.45	0.87	1.07	1.14	0.01	1.47	0.68
BnaA05G0062400ZS	1.64	1.75	1.23	1.21	1.22	0.93	1.12	1.54	1.62	1.7	0.89	0.96	0.97	0.15	1.3	0.49
BnaC03G0228500ZS	1.42	1.5	0.9	0.9	0.96	0.86	1.06	1.25	1.08	1.09	0.54	0.77	0.95	0.14	1.26	0.85
BnaA04G0252000ZS	0.12	0.21	0	0	0.01	0.04	0	0.05	0.09	0.05	1.02	0.44	0.32	0.09	0.12	0.03
BnaA05G0060900ZS	0.02	0.08	0	0.08	0.08	0.14	0	0.03	0	0	0.67	0.09	0.08	0	0.1	0.07
BnaC04G0066800ZS	0	0.12	0	0.02	0	0.02	0	0	0	0	0.86	0.21	0.04	0.02	0	0
BnaC04G0571500ZS	0.05	0.12	0.02	0.02	0.05	0.02	0	0.02	0.1	0.12	0.95	0.39	0.39	0.34	0.05	0.14
BnaA03G0201400ZS	0.01	0.01	0	0	0	0	0	0	0.01	1.25	0.08	0.03	0.03	0.83	0	0
BnaA05G0022700ZS	0	0	0	0	0	0	0	0	0	0.85	0.06	0.03	0.01	0.48	0	0.04
BnaC03G0237900ZS	0	0	0	0	0	0	0	0	0	1.2	0.07	0.05	0.03	0.73	0	0
BnaC04G0024500ZS	0	0	0	0	0	0	0	0	0	0.89	0.07	0.06	0	0.48	0	0.01
BnaA03G0202500ZS	0.84	0.85	0.68	0.69	0.6	0.65	0.61	0.78	1.03	1	0.89	0.9	0.97	0.18	0.87	0.89
BnaA04G0264200ZS	0.1	0.02	0.01	0	0.04	0	0	0	0	0.03	0	0.1	0.04	0	0	0
BnaC04G0581400ZS	0.16	0.25	0.03	0.02	0	0	0	0.02	0	0.03	0.19	0.17	0.08	0	0.07	0
BnaA04G0264300ZS	0.75	0.11	0.3	0.28	0.18	0.12	0.07	0.45	0.51	0.83	0.6	0.75	1.04	0	0.03	0.01
BnaA05G0023900ZS	0.05	0	0.21	0.21	0.08	0.23	0.01	0.05	0.7	0.07	0.1	0.03	0.06	0	0	0.13
BnaC04G0025700ZS	0.05	0	0.45	0.41	0.23	0.05	0.02	0.11	0.57	0.19	0.23	0.17	0.21	0	0.02	0.02
BnaC04G0581500ZS	1.03	0.81	0.55	0.56	0.35	0.15	0.01	0.42	0.56	0.96	0.71	0.76	1.01	0	0	0.01
BnaA09G0435600ZS	0	0	0	0	0	0	0	0	0.02	0	0	0.07	0.08	0	0	0
BnaC05G0227600ZS	0	0.03	0	0	0	0	0	0	0.18	0.02	0	0	0.25	0.12	0	0
BnaA04G0265200ZS	1.15	0.53	0.7	0.71	0.83	0.79	1.22	1.43	0.4	0.64	1.08	0.37	0.75	0	1.26	1.16
BnaA05G0024800ZS	1.81	1.76	0.8	0.72	0.72	0.56	0.99	1.6	1.11	1.21	0.11	0.18	0.25	0.05	1.77	0.91
BnaC04G0026400ZS	1.5	1.55	0.79	0.75	0.74	0.53	0.75	1.42	0.72	1.03	0.09	0.08	0.44	0	1.57	1
BnaC04G0582300ZS	1.38	0.8	0.89	0.81	0.93	0.55	1.13	1.3	0.8	0.88	1.23	0.63	0.82	0.03	1.42	0.77
BnaA05G0025600ZS	1.23	1.11	0.84	0.8	0.85	0.89	0.71	0.89	1.42	1.86	1.41	1.35	1.29	2.36	1.31	1.36
BnaC04G0027100ZS	1	0.94	0.8	0.77	0.77	0.87	0.71	0.78	1.31	1.54	1.3	1.38	1.38	1.72	1.48	1.21
BnaA05G0025900ZS	0.35	0.37	0.16	0.17	0.1	0.19	0.11	0.17	0.73	0.39	0.08	0.24	0.05	0.05	0.31	0.35
BnaC04G0027500ZS	0.57	0.5	0.35	0.26	0.38	0.36	0.28	0.39	0.88	0.58	0.2	0.53	0.1	0	0.46	0.56
BnaA05G0026300ZS	0.75	0.71	0.75	0.8	0.82	0.84	0.86	0.86	0.66	0.45	0.44	0.36	0.31	0.06	0.81	0.98
BnaC04G0027900ZS	1.02	1	0.94	0.9	0.96	1.01	0.71	0.8	0.82	0.79	0.89	0.89	0.87	0.53	0.82	1.03
BnaA03G0205100ZS	0	0	0.02	0.02	0.05	0.04	0	0	0	1.48	0.67	0.39	0.25	1.92	0	0
BnaA04G0268300ZS	0	0	0.01	0.03	0	0.04	0	0	0.05	0.79	0.14	0.01	0.01	0.81	0	0.01
BnaA05G0028500ZS	0	0	0	0	0	0	0	0	1.02	0.8	0.22	0.05	0.05	0.93	0	0
BnaC03G0241700ZS	0.01	0	0.01	0	0	0.02	0	0	0.04	1.21	0.39	0.12	0.08	1.31	0	0
BnaC04G0585600ZS	0	0	0.02	0	0.03	0.06	0	0	0	0.71	0.18	0.31	0.02	0.8	0.01	0
BnaA04G0269600ZS	0.15	0.12	0.55	0.56	0.59	0.75	0.74	0.7	0.05	0.29	0.55	0.26	0.18	0.09	0.46	0.53
BnaA05G0029800ZS	0.73	0.55	0.48	0.46	0.54	0.71	0.74	0.76	0.26	0.13	0.54	0.69	0.8	0.16	0.09	0.33
BnaC04G0032300ZS	0.61	0.5	0.47	0.47	0.5	0.45	0.53	0.65	0.28	0.21	0.97	1.68	1.5	0.06	0.09	0.47
BnaC04G0586900ZS	0.35	0.11	0.18	0.21	0.25	0.51	0.46	0.47	0.23	0.65	0.97	1.39	1.1	0.82	0.68	0.44
BnaA04G0272400ZS	0.02	0.02	0.08	0.05	0.05	0	1.66	2.08	2.72	1.8	0.11	0	0.01	0	1.44	0
BnaA05G0033400ZS	0.01	0	0	0	0	0	0.24	0.9	2.1	1.53	0.14	0.01	0	0	0	0
BnaC04G0590000ZS	0.01	0.02	0.14	0.05	0.04	0	1.46	1.92	2.61	1.78	0.14	0	0.01	0	2.19	0
BnaC04G0036100ZS	0	0	0	0	0	0	0.11	0.94	2.22	1.57	0.08	0	0	0	0	0
BnaA03G0208400ZS	0.86	0.84	0.68	0.66	0.72	0.85	0.31	0.42	0.67	0.71	1.59	1.75	1.68	0.79	0.48	0.91
BnaA05G0034700ZS	0.78	0.76	0.61	0.61	0.63	0.85	0.33	0.4	0.64	0.98	1.86	2.1	1.99	1.02	0.23	0.84
BnaC03G0245400ZS	0.71	0.68	0.53	0.57	0.62	0.74	0.33	0.46	0.69	0.7	1.41	1.56	1.46	0.59	0.46	0.83
BnaC04G0037600ZS	0.73	0.73	0.62	0.62	0.69	0.89	0.34	0.39	0.55	0.9	1.7	1.9	1.73	0.76	0.34	0.94
BnaA03G0209100ZS	0.56	0.51	0.14	0.16	0.15	0.22	0.29	0.29	0.49	1.02	0.37	0.34	0.49	0.82	0.6	0.19
BnaA05G0035700ZS	0.44	0.54	0.26	0.18	0.17	0.08	0.43	0.45	0.68	0.92	0.3	0.17	0.28	0.92	0.43	0.11
BnaC03G0246300ZS	0.52	0.62	0.37	0.37	0.4	0.48	0.53	0.43	0.49	1.05	0.64	0.47	0.73	0.93	0.53	0.42
BnaC04G0038800ZS	0.44	0.42	0.21	0.26	0.19	0.15	0.32	0.35	0.67	0.8	0.69	1.05	1.27	0.67	0.33	0.15
BnaA05G0038200ZS	1.05	1.04	0.92	0.95	0.92	1.1	0.86	0.97	1.11	0.98	1.04	1.15	0.99	1	0.9	1.09
BnaA09G0542400ZS	1.02	1.03	0.74	0.75	0.78	0.95	0.62	0.64	0.8	0.79	0.74	0.72	0.81	0.28	0.6	0.85
BnaC04G0041700ZS	1.18	1.14	0.92	0.95	0.94	1.17	0.79	1.04	1.18	1	0.9	0.93	0.84	1.14	0.91	1.21
BnaC08G0389100ZS	0.91	0.87	0.64	0.66	0.63	0.75	0.42	0.55	0.84	0.7	0.89	0.9	0.94	0.4	0.46	0.71
BnaA04G0278900ZS	1.33	1.44	1.88	1.87	1.88	1.72	2.18	2.06	1.45	1.27	0.96	0.69	0.61	0.06	1.87	1.43
BnaA05G0040200ZS	1.49	1.46	1.72	1.71	1.75	1.76	1.83	1.75	1.46	1.39	2.01	1.8	1.81	0.2	1.59	1.78
BnaC04G0043900ZS	1.7	1.7	1.98	1.97	2.01	1.97	2.11	2.01	1.56	1.58	1.66	1.54	1.46	0.07	1.87	1.83
BnaC04G0597000ZS	0.92	1.09	1.31	1.33	1.31	1.07	1.99	1.64	1.2	0.87	0.84	0.61	0.76	0.01	1.37	0.69
BnaA05G0040500ZS	1.48	1.38	1.24	1.18	1.24	1.25	0.94	1.11	1.25	1.51	1.59	1.57	1.59	1.11	1.15	1.22
BnaC04G0044200ZS	1.38	1.29	1.2	1.2	1.24	1.28	1.17	1.14	1.22	1.55	1.27	1.26	1.29	1.48	1.07	1.08
BnaC04G0044400ZS	1.57	1.14	0.51	0.45	0.46	0.28	0.79	0.77	1.36	0.81	0.03	0.04	0.11	0	0.57	0.08
BnaA03G0213800ZS	0.01	0.08	0.98	0.99	1.16	1.68	0.2	0.58	0.82	0.99	0.84	0.57	0.57	0.02	0.94	1.89
BnaA05G0040900ZS	0.13	0.25	0.24	0.27	0.26	0.59	0.21	0.48	0.1	0.07	0.04	0.13	0.12	0	0.26	0.4
BnaC04G0044600ZS	0.55	0.6	0.29	0.29	0.36	0.67	0.36	0.54	0.68	0.23	0.08	0.01	0.15	0	0.31	1.32
BnaA03G0215000ZS	0.11	0.17	0.06	0.02	0.06	0.08	0.03	0.16	0.18	0.02	0.44	0.6	0.76	0.02	0.23	0.42
BnaA05G0042000ZS	0.02	0.02	0.05	0.03	0.09	0.01	0.05	0.03	0	0.03	0.23	0.01	0.06	0	0.28	0.02
BnaC03G0253500ZS	0.15	0.23	0.09	0.08	0.07	0.08	0.03	0.25	0.08	0	0.83	0.86	1.09	0	0.21	0.42
BnaC04G0045800ZS	0.08	0.02	0	0.02	0	0.02	0.01	0.06	0	0.03	0.19	0	0.02	0	0.05	0.1
BnaA05G0048000ZS	0.03	0	0.01	0	0	0	0	0.18	0.03	0	0	0	0	0	0	0.01
BnaC04G0053700ZS	0	0	0	0	0	0.01	0.03	0	0	0	0.01	0	0.02	0	0	0
BnaA05G0048300ZS	0	0	0.01	0	0.01	0	0	0	0.01	0.01	0.07	0.12	0.23	0	0.01	0
BnaC04G0054000ZS	0	0	0	0	0	0	0	0	0.01	0.12	0.02	0.03	0.06	0	0	0
BnaA03G0219600ZS	0	0	0.18	0.14	0.12	0	0.78	0.8	0.94	0.41	0	0	0	0.06	0.01	0
BnaC03G0258500ZS	0	0	0.33	0.33	0.22	0	0.81	0.96	1.26	0.87	0	0	0	0.16	0.42	0
BnaA04G0287100ZS	0.32	0.34	0.05	0.05	0.06	0.03	0.16	0.26	0.96	0.33	0	0	0.07	0	0.09	0
BnaA05G0053200ZS	0.4	0.36	0.03	0.06	0.05	0.01	0.17	0.3	0.73	0.32	0.02	0.05	0.06	0.11	0.06	0
BnaC04G0059100ZS	0.42	0.46	0.09	0.02	0.08	0	0.17	0.19	0.71	0.29	0.06	0.01	0.18	0.01	0.06	0
BnaC04G0605200ZS	0.34	0.4	0.08	0.02	0	0.01	0.11	0.18	0.81	0.33	0.08	0.16	0.15	0	0.11	0
BnaC04G0060400ZS	2.41	2.32	2.5	2.48	2.51	2.63	1.01	1.04	1.04	0.62	1.41	1.39	1.43	0.65	1.28	1.6
BnaA03G0222300ZS	0	0	0.06	0.09	0.1	0.09	0.03	0.03	0.03	2.12	1.32	0.87	0.67	2.51	0.01	0.01
BnaA04G0291000ZS	0.23	0.16	0.12	0.09	0.12	0.14	0.16	0.17	0.31	0.33	0.33	0.34	0.69	0.36	0.07	0.27
BnaA03G0223400ZS	0	0	0	0	0	0	0	0	0	1.94	0.03	0	0	0.5	0	0
BnaC03G0262500ZS	0	0	0	0	0	0	0	0	0	2.08	0.1	0.06	0.07	1.03	0	0
BnaA05G0018200ZS	0.37	0.58	0.87	0.79	0.85	0.85	0.71	0.86	0.69	1.36	0.46	0.69	0.62	0.09	0.98	1.46
BnaC04G0018700ZS	0.61	0.46	0.37	0.48	0.61	0.69	0.13	0.35	0.3	0.98	0.2	0.37	0.23	0.03	0.71	1.65
BnaC04G0609900ZS	0	0	0.01	0.05	0.03	0.02	0.16	0.05	0.51	0.03	0	0	0	0	0.03	0
BnaA03G0223600ZS	1.03	1.14	0.39	0.44	0.4	0.36	0.55	0.58	0.76	0.39	0.05	0.27	0.35	0.02	0.47	0.07
BnaA05G0016300ZS	0.56	0.36	0.11	0.18	0.18	0.24	0.19	0.21	0.43	0.26	0.35	0.22	0.33	0.03	0.19	0.35
BnaC04G0016800ZS	0.68	0.46	0.21	0.19	0.2	0.46	0.14	0.23	0.56	1.35	0.31	0.24	0.22	0.03	0.42	0.8
BnaA05G0011600ZS	1.4	1.47	0	0.01	0.02	0.03	0	0.19	0.21	0	0	0	0.06	0	1.3	0
BnaC04G0012100ZS	1.2	1.72	0.26	0.18	0.15	0.05	0	0.09	0.01	0.08	0.13	0.02	0.36	0	1.21	0
BnaA04G0295000ZS	1.45	1.49	0.02	0.05	0.01	0	0	0.22	0.03	0.03	0	0	0	0	1.35	0.51
BnaA05G0007800ZS	0.09	0.08	0.71	0.84	0.72	0.9	0	0	0.37	3.24	2.6	2.18	1.9	3.83	0	0.07
BnaC04G0009700ZS	0.07	0.08	0.61	0.76	0.68	0.85	0	0	0.29	3.14	2.59	2.16	1.89	3.72	0.01	0.1
BnaA05G0004000ZS	0	0	0	0	0	0	0	0	0	0	0	0	0	0	0	0
BnaA05G0003800ZS	0	0	0	0	0	0.02	0	0	0.3	0.16	0	0	0	0.17	0	0.1
BnaA03G0022700ZS	1.17	0.97	0.75	0.76	0.81	0.91	1.04	1.02	1.58	1.06	0.68	0.7	0.48	0.01	0.97	1.09
BnaC03G0027600ZS	1.25	0.98	0.8	0.73	0.81	0.91	1.1	1.06	1.6	1.11	0.53	0.56	0.28	0.1	1.05	1.03
BnaA03G0174500ZS	0.97	0.6	0.21	0.16	0.25	0.56	0.04	0.15	0.5	0.21	0.97	0.9	0.66	0.01	1.05	1.31
BnaC03G0203300ZS	0.75	0.48	0.29	0.23	0.31	0.66	0.03	0.1	0.16	0.1	1.02	1.01	0.45	0	0.99	1.34
BnaC05G0564000ZS	1.32	1.11	0.84	0.83	0.88	0.97	0.78	0.78	1.08	1.04	1.14	1.24	1.23	0.6	0.81	0.87
BnaC05G0560100ZS	0.82	0.73	0.55	0.58	0.59	0.71	0.65	0.64	0.77	0.62	0.73	0.82	0.71	0.37	0.68	0.86
BnaA03G0283300ZS	0.21	0.17	0.01	0.12	0.04	0.44	0.04	0.05	0.44	2.23	0.94	1.36	1.32	1.12	0	0.59
BnaC03G0340900ZS	0	0.01	0.03	0.01	0	0.18	0	0.05	0.27	1.68	0.78	1.26	1.29	0.9	0	0.71
BnaC05G0559400ZS	0	0.01	0	0	0	0	0	0	0.01	0.37	0.94	1.07	0.86	1.53	0.01	0
BnaC03G0164600ZS	1.23	1.14	0.99	0.96	1.04	1.05	0.94	0.97	1.39	1.19	1.05	1.15	0.93	0.86	1.02	1.23
BnaC03G0176600ZS	0	0.02	0	0	0	0.04	0	0.01	0.12	0.09	0	0.04	0.01	0.12	0	0.05
BnaA03G0282500ZS	1.23	1.27	0.94	0.93	0.86	0.61	0.92	1.32	0.82	1.09	0.1	0.01	0.01	0	1.09	0
BnaA05G0493700ZS	1.12	0.55	0.67	0.38	0.31	0.28	0.41	0.7	0.13	0.5	0	0	0	0	0.4	0
BnaC03G0339800ZS	1.25	1.29	0.92	0.93	0.81	0.55	0.87	1.3	0.84	1.13	0.23	0.04	0.02	0	1.07	0
BnaA05G0494300ZS	1.18	1.21	0.84	0.85	0.75	0.48	0.9	1.4	0.5	0.8	0.15	0.02	0	0	0.78	0
BnaC01G0493500ZS	0.94	0.88	0.57	0.52	0.46	0.27	0.64	1.03	0.13	0.39	0.12	0.15	0.49	0	0.48	0
BnaA05G0494500ZS	0.09	0.04	0.8	0.84	0.69	0.82	0	0	0.41	3.12	2.61	2.16	1.92	3.76	0.03	0.02
BnaC02G0411700ZS	1.53	1.45	1.01	1.03	1.02	1.03	0.84	1.14	1.23	1.36	1.33	1.22	1.36	0.49	1.25	1.09
BnaA01G0417100ZS	0.96	0.84	0.68	0.72	0.71	0.83	0.74	0.79	0.83	0.74	0.7	0.67	0.67	0.67	0.64	0.76
BnaA03G0286200ZS	0.87	0.7	0.81	0.8	0.8	0.83	0.52	0.6	0.51	0.43	0.93	0.85	0.9	0.08	0.55	0.7
BnaC03G0344100ZS	0.82	0.83	0.71	0.73	0.73	0.81	0.44	0.62	0.75	0.73	1.14	1.13	1.21	0.37	0.61	0.68
BnaA03G0286300ZS	0.7	0.73	0.38	0.37	0.35	0.45	0.33	0.67	0.69	0.77	1.03	0.79	1.11	0.11	0.49	0.44
BnaC03G0344200ZS	0.77	0.79	0.37	0.4	0.36	0.44	0.22	0.45	0.8	0.75	0.91	0.75	1.03	0.35	0.66	0.74
BnaC05G0566400ZS	0.25	0.61	0.06	0.05	0.07	0.03	0.01	0.02	0.17	0.79	0.05	0.21	0.18	0.01	0.4	0.05
BnaC01G0500700ZS	0.67	0.81	0.83	0.79	0.8	0.63	0.79	0.96	0.88	1.09	0.8	0.7	0.59	1.25	1.07	0.67
BnaC05G0568800ZS	0.8	1.03	1.03	0.97	1	0.94	1.12	1.18	1.06	1.24	0.74	0.47	0.63	0.29	1.29	0.84
BnaA01G0194300ZS	0	0	0	0	0	0	0	0	0	0	0	0	0	0	0	0
BnaA03G0289700ZS	0.02	0.04	0.08	0.09	0.14	0.15	0	0	0.06	1.88	1.28	0.9	0.68	2.6	0	0.02
BnaA05G0490800ZS	0	0	0	0	0	0	0	0	0	0.62	0	0.01	0.02	0.46	0	0
BnaC03G0347900ZS	0	0	0.11	0.15	0.09	0.16	0	0	0.04	1.84	1.55	1.14	0.9	2.59	0	0
BnaA03G0290500ZS	0	0	0	0	0.01	0	0	0.03	0.01	0.13	0.04	0	0	0.14	0.05	0.06
BnaC03G0349200ZS	0	0	0	0	0	0	0	0	0.01	0.22	0.06	0.08	0.09	0.35	0	0
BnaA01G0408000ZS	0	0	0	0	0	0	0	0	0.02	0	0.02	0.21	0.27	0	0	0
BnaC05G0549400ZS	0.72	0.74	0.62	0.68	0.69	0.94	0.38	0.41	1.13	0.02	0.45	0.39	0.24	0	0.52	0.9
BnaA01G0407600ZS	1.18	1.03	0.69	0.71	0.63	0.58	0.69	0.7	0.77	1.37	0.56	0.58	0.72	0.9	0.92	0.44
BnaC01G0507700ZS	1.2	1.3	0.41	0.35	0.33	0.1	0.6	0.66	0.74	1.46	0.73	0.93	0.95	0.77	0.93	0.08
BnaA01G0406400ZS	0.83	0.85	0.52	0.44	0.48	0.49	0.52	0.58	0.7	0.69	0.55	0.57	0.66	0.11	0.75	0.65
BnaA03G0292600ZS	0.73	0.63	0.45	0.44	0.45	0.43	0.43	0.4	0.58	0.47	0.32	0.28	0.34	0.01	0.57	0.48
BnaC01G0508700ZS	0.72	0.62	0.31	0.29	0.31	0.34	0.41	0.56	0.51	0.45	0.28	0.37	0.36	0.05	0.79	0.43
BnaC03G0351300ZS	0.61	0.54	0.31	0.34	0.37	0.36	0.36	0.42	0.46	0.45	0.32	0.34	0.34	0.03	0.64	0.41
BnaA05G0482700ZS	0.67	0.55	0.38	0.39	0.43	0.34	0.97	0.88	0.8	0.61	0.09	0.11	0.05	0	0.89	0.72
BnaC05G0557500ZS	0.81	0.68	0.62	0.67	0.68	0.56	1.15	1.04	1.04	0.77	0.26	0.26	0.17	0	1.03	0.84
BnaA03G0295200ZS	1.5	1.33	1.19	1.18	1.19	1.22	1.04	1.04	1.46	1.25	1.09	1.22	1.1	0.67	1.18	1.14
BnaC03G0353600ZS	1.46	1.3	1.19	1.2	1.23	1.24	1.03	1.01	1.51	1.25	1.25	1.37	1.26	0.89	1.11	1.23
BnaA03G0295700ZS	0.99	0.91	0.77	0.73	0.78	0.69	0.82	0.9	1.17	1.01	0.51	0.48	0.46	0.52	0.84	0.78
BnaC03G0354200ZS	0.8	0.76	0.73	0.66	0.68	0.66	0.71	0.76	1.06	0.77	0.46	0.41	0.34	0.28	0.7	0.51
BnaA09G0384700ZS	0	0	0	0	0	0	0	0.01	0.05	0.06	0.59	0.05	0.41	0	0	0
BnaC03G0356200ZS	0	0.06	0	0	0	0.03	0	0	0	0	0.18	0.09	0	0	0	0
BnaA09G0384600ZS	0	0	0	0	0	0	0	0	0	0	0.03	0	0	0	0	0
BnaA01G0400800ZS	0.45	0.33	0.08	0.09	0.13	0.08	0.09	0.11	0.64	0.23	0.04	0.01	0.05	0.05	0.13	0.05
BnaC01G0513800ZS	0.4	0.39	0.1	0.06	0.1	0.07	0.08	0.16	0.57	0.21	0.05	0.05	0.12	0	0.12	0.03
BnaA05G0475800ZS	0.51	0.95	0.71	0.73	0.77	1.04	0.27	0.71	0.41	0.2	0.26	0.16	0.17	0.09	0.29	1.18
BnaA01G0398900ZS	0.49	0.54	0.06	0.08	0.05	0.07	0.14	0.13	0.55	0.23	0.09	0.03	0.06	0.11	0.15	0.22
BnaC01G0515300ZS	0.07	0.18	0.06	0.06	0.09	0.14	0.15	0.21	0.61	0.21	0.06	0.01	0	0.35	0.1	0.27
BnaC05G0536800ZS	0.42	0.33	0.2	0.21	0.21	0.38	0.16	0.41	0.14	0.31	0.43	0.56	0.74	0.21	0.3	0.66
BnaA03G0299000ZS	1.64	1.71	1.3	1.32	1.33	1.27	1.32	1.42	1.58	1.42	1.24	1.26	1.25	0.73	1.35	1.18
BnaA05G0474100ZS	1.55	1.45	1.22	1.2	1.28	1.3	1.12	1.19	1.54	1.43	1.44	1.53	1.34	0.89	1.43	1.3
BnaC01G0516200ZS	1.53	1.49	1.32	1.29	1.3	1.34	1.24	1.25	1.6	1.46	1.36	1.51	1.32	0.59	1.41	1.32
BnaC05G0534900ZS	1.56	1.44	1.26	1.24	1.26	1.29	1.26	1.34	1.52	1.37	1.46	1.62	1.43	0.83	1.31	1.32
BnaA03G0299300ZS	0.16	0.69	0.47	0.45	0.5	0.58	0.47	0.49	0.25	0.82	0.31	0.32	0.28	0.77	1.13	1.12
BnaA05G0473400ZS	0.89	0.88	0.58	0.62	0.63	0.72	0.41	0.68	0.64	1.14	0.76	0.76	0.87	1.25	0.83	1.04
BnaA01G0396900ZS	0	0	0.01	0	0	0.01	0	0	0.02	1.25	0.2	0.06	0.02	0.85	0	0
BnaC03G0358800ZS	0.21	0.58	0.49	0.46	0.5	0.59	0.36	0.39	0.39	1.2	0.91	0.79	0.8	1.19	1.37	1.31
BnaC05G0534300ZS	0.85	0.74	0.32	0.29	0.29	0.43	0.25	0.48	0.17	1.17	0.46	0.39	0.48	1.3	0.51	0.85
BnaC01G0487100ZS	0	0	0	0	0	0	0	0	0	0	0	0	0	0	0	0
BnaA03G0300000ZS	0.94	0.81	0.59	0.62	0.67	0.67	0.52	0.57	0.88	0.66	0.58	0.72	0.48	0.22	0.65	0.6
BnaC03G0359600ZS	0.97	0.85	0.62	0.64	0.69	0.69	0.52	0.57	0.94	0.74	0.61	0.73	0.5	0.36	0.61	0.58
BnaA03G0300100ZS	1.12	0.79	0.84	0.9	0.9	0.92	0.34	0.33	0.33	0.05	0.1	0	0	0.01	0.33	0.86
BnaA01G0396200ZS	1.05	0.94	1.06	0.93	1.01	0.8	0.84	0.52	0.02	0	0.1	0.09	0.02	0	0.15	0.01
BnaC05G0533300ZS	0	0.03	0	0	0.03	0.02	0.04	0	0	0	0	0	0	0	0	0
BnaA05G0471800ZS	0.13	0.13	0.33	0.35	0.32	0.3	0.54	0.57	0.88	0.24	0.06	0.03	0	0	0.1	0.07
BnaC05G0532400ZS	0.41	0.42	0.32	0.35	0.21	0.55	0.66	0.72	1.07	0.18	0.39	0.39	0.18	0	0.08	0.27
BnaA05G0471100ZS	1.48	1.12	0.87	0.88	0.9	0.97	1.15	1.85	0.86	1.19	0.96	1.27	1.33	0.06	0.84	1.27
BnaA01G0394700ZS	0.26	0.34	0.28	0.21	0.16	0.26	0.45	1.42	0.15	0.02	0	0.02	0.02	0	0.08	0.13
BnaC05G0531800ZS	0.42	0.41	0.29	0.2	0.19	0.17	0.71	1.49	0.82	0.64	0.12	0.27	0.3	0	0.25	0.09
BnaA03G0301300ZS	0.73	0.78	1.43	1.45	1.52	1.73	1.48	1.34	0.26	0.08	1.27	0.88	1.01	0.1	1.2	1.8
BnaC03G0361000ZS	0.95	0.84	1.09	1.11	1.17	1.37	1.07	0.82	0.46	0.23	1.14	0.9	1.03	0.04	1.04	1.49
BnaA05G0470200ZS	0	0	0	0	0	0	0	0	0	0.01	0	0	0	0	0	0
BnaC05G0531000ZS	0	0	0	0	0	0	0	0	0	0	0	0	0	0	0	0
BnaA05G0468800ZS	0	0.05	0	0.03	0.01	0.03	0	0	1.89	0	0.02	0.06	0.08	0	0	0.05
BnaC05G0529700ZS	0	0.02	0.01	0.02	0.06	0.03	0	0	2.15	0	0	0.06	0.01	0.02	0	0
BnaA01G0392700ZS	1.69	1.8	1.05	1.07	1.09	0.94	1.33	1.26	1.28	1.43	0.91	0.75	0.94	0.27	1.41	0.9
BnaC05G0526900ZS	0.03	0.01	0.01	0.01	0.01	0	0.68	0.73	0.96	0.75	0	0.01	0.01	0	0.05	0
BnaA05G0466000ZS	1.09	0.98	1.24	1.3	1.32	1.34	1.44	1.55	1.29	0.99	1.23	1.36	1.23	0.06	1.39	1.45
BnaC05G0526100ZS	1.18	1.03	1.21	1.26	1.29	1.31	1.22	1.43	1.16	0.98	1.19	1.17	1.06	0.1	1.27	1.42
BnaA05G0462100ZS	0	0	0	0	0	0	0	0	0	0	0	0	0	0	0	0
BnaC05G0521900ZS	0	0	0	0	0	0	0	0	0.01	0	0	0	0	0	0	0
BnaA01G0387500ZS	0.87	0.71	0.55	0.58	0.58	0.7	0.55	0.56	0.99	0.56	0.09	0.15	0.02	0.06	0.67	0.74
BnaC01G0491200ZS	0.64	0.58	0.4	0.4	0.41	0.44	0.4	0.46	0.9	0.39	0.4	0.8	0.24	0.02	0.57	0.56
BnaA05G0461000ZS	0.75	0.5	0.35	0.35	0.4	0.46	0.32	0.48	0.59	0.41	0.68	0.69	0.69	0.03	0.85	1.05
BnaC05G0520500ZS	0.6	0.31	0.15	0.19	0.21	0.32	0.27	0.27	0.61	0.3	0.97	0.84	0.81	0.02	0.93	1.03
BnaC01G0491900ZS	0	0.01	0	0	0	0.02	0	0.04	0.05	0.04	0	0.04	0.16	0	0	0.55
BnaA05G0456400ZS	0.88	0.65	0.48	0.52	0.53	0.7	0.5	0.55	0.88	0.67	0.59	0.49	0.58	0.12	0.74	1.09
BnaC03G0373100ZS	0	0.23	0	0	0.02	0	0	0	0.23	1.08	0.13	0.04	0.04	0.84	0	0
BnaA05G0453600ZS	0	0	0.01	0.04	0	0.03	0	0	0.27	0.02	0.12	0.01	0.16	0.01	0	0
BnaC05G0511700ZS	0.03	0	0.03	0.14	0.11	0.01	0	0	0.31	0.02	0.35	0.03	0.28	0	0	0
BnaA05G0452400ZS	1.38	1.41	1.45	1.46	1.49	1.53	1.75	1.91	1.67	1.49	1.05	1.09	1.11	0.84	1.77	2.12
BnaC05G0510700ZS	1.41	1.35	1.3	1.31	1.32	1.35	1.65	1.63	1.62	1.37	1.5	1.58	1.57	0.6	1.55	1.9
BnaC05G0508000ZS	0	0	0	0	0	0	0	0	0	0	0	0	0	0.01	0	0
BnaA05G0444200ZS	0.18	0.2	0.39	0.42	0.48	0.36	0.31	0.44	0.63	0.64	0.46	0.46	0.3	0.77	1.43	1.99
BnaC05G0507200ZS	0.45	0.42	0.52	0.55	0.64	0.46	0.5	0.61	0.82	0.94	0.56	0.62	0.41	0.97	1.55	2.07
BnaC01G0483000ZS	0.1	0.1	0.12	0.11	0.2	0.16	0.1	0.26	0.21	0.08	0.14	0.2	0.07	0.02	0.16	0.17
BnaA03G0316100ZS	0.38	0.55	0.3	0.33	0.41	0.42	0.41	0.58	1.1	0.62	1.13	1.2	1.21	0.02	0.63	0.34
BnaC03G0379100ZS	0.57	0.6	0.36	0.44	0.43	0.41	0.38	0.37	0.77	0.55	0.58	0.64	0.45	0.01	0.56	0.32
BnaA03G0313000ZS	0.02	0	0	0	0	0	0	0	0	0	0	0	0	0	0	0
BnaA05G0438500ZS	0.04	0.1	0.05	0.04	0	0.04	0.06	0	0	0	0	0	0	0	0	0
BnaC03G0375200ZS	0.02	0	0	0	0.02	0.06	0	0.01	0	0	0	0	0	0	0.07	0
BnaA08G0257500ZS	0	0	0	0	0	0	0	0	0.08	0	0	0	0	0	0	0
BnaA09G0614100ZS	0.69	0.71	0.43	0.34	0.42	0.36	0.78	0.82	1.03	0.8	0.35	0.37	0.22	0.05	0.78	0.59
BnaC08G0244900ZS	0	0	0	0	0	0.03	0.01	0	0.35	0	0.03	0	0	0	0	0.03
BnaC08G0469700ZS	0.73	0.65	0.53	0.53	0.48	0.46	0.75	0.73	1.09	0.88	0.33	0.51	0.23	0	0.88	0.72
BnaA03G0318500ZS	0.94	0.83	0.74	0.73	0.76	0.81	0.6	0.72	0.92	0.79	0.69	0.68	0.65	0.43	0.58	0.72
BnaA03G0319100ZS	0.92	0.84	0.72	0.65	0.66	0.76	0.41	0.54	0.91	0.72	0.88	1.13	0.95	0.49	0.51	0.78
BnaC03G0382700ZS	0.89	0.81	0.6	0.54	0.62	0.63	0.48	0.52	0.75	0.67	0.89	1.16	0.94	0.26	0.47	0.75
BnaA01G0379800ZS	1.39	1.4	0.85	0.85	0.88	1.01	0.62	0.87	1.25	1.01	1.3	1.78	1.57	0.43	0.93	1.01
BnaC05G0494600ZS	1.33	1.1	0.75	0.79	0.77	0.87	0.83	0.97	1.12	1.03	0.96	0.96	0.88	0.7	1.06	0.9
BnaA01G0376200ZS	1.85	1.93	1.86	1.89	1.87	1.72	1.77	1.75	2.04	1.93	1.55	1.73	1.9	0.62	1.96	1.78
BnaA05G0446100ZS	1.33	1.35	1.41	1.37	1.41	1.24	1.6	1.62	1.57	1.6	1.47	1.66	1.7	0.42	1.65	1.4
BnaC01G0471300ZS	1.98	1.89	2	1.99	1.99	1.85	1.85	1.86	2.03	2.1	2.27	2.4	2.52	1.24	2.05	2.05
BnaA03G0322800ZS	1.05	0.94	0.82	0.81	0.85	0.86	0.79	0.9	1.04	1.15	1.44	1.52	1.59	0.5	0.94	1.16
BnaC03G0387000ZS	1.05	0.93	0.91	0.9	0.85	0.91	0.86	0.92	1.07	1.12	1.23	1.3	1.34	0.28	0.94	1.13
BnaC05G0489000ZS	1.01	1.01	0.98	1.01	0.95	0.96	0.76	0.8	0.82	1.12	0.98	0.87	1.16	0.72	0.89	0.76
BnaA05G0433800ZS	0.88	0.79	0.54	0.55	0.58	0.68	0.46	0.44	0.99	0.75	0.59	0.65	0.43	0.39	0.58	0.54
BnaC05G0488100ZS	1.11	0.97	0.65	0.64	0.66	0.7	0.43	0.45	1.01	0.84	0.68	0.7	0.6	0.39	0.65	0.59
BnaA01G0373700ZS	1.09	0.93	0.42	0.42	0.46	0.55	0.48	0.43	0.9	0.67	0.76	0.95	0.76	0.35	0.37	0.42
BnaA05G0433500ZS	0.51	0.42	0.36	0.35	0.41	0.28	0.51	0.46	0.49	0.39	0.2	0.15	0.14	0	0.39	0.45
BnaA03G0325500ZS	0.83	0.68	0.63	0.67	0.71	0.9	0.67	0.83	0.4	1.1	1.35	1.39	1.5	1.55	1.02	1.09
BnaA05G0429900ZS	0	0.11	0	0.02	0.01	0.07	0	0	0.01	1.18	0.33	0.1	0.11	1.64	0	0
BnaC03G0391300ZS	1.12	0.91	1.05	1.09	1.14	1.21	0.78	0.99	0.69	1.34	1.92	1.91	1.88	1.67	1.03	1.32
BnaC05G0483100ZS	0	0	0	0	0	0	0	0	0	0	0.09	0.06	0.03	0.16	0	0
BnaA05G0427500ZS	0.34	0.32	0.21	0.37	0.43	0.08	1.28	1.32	1.97	1.5	0.09	0.21	0.31	0.21	0.81	0.01
BnaC05G0479900ZS	1.07	1.11	0.76	0.79	0.85	0.11	1.76	1.77	1.98	2.28	0.74	1.47	1.08	1.03	1.78	0
BnaA01G0367900ZS	0	0	0	0	0	0	0	0.03	0	0.58	0.01	0	0	0.27	0	0
BnaA03G0327100ZS	0	0	0	0	0	0	0	0	0.39	0.33	0	0	0	0.15	0	0
BnaA05G0427000ZS	0.01	0	0	0	0	0	0	0	0.23	0.74	0.04	0.02	0.01	0.31	0	0
BnaC03G0392500ZS	0	0	0	0	0	0	0	0	0	0.51	0	0	0	0.08	0	0
BnaA01G0365600ZS	0.04	0.04	0.02	0.05	0	0.03	0	0.02	0.04	1.4	0.73	0.49	0.26	1.66	0.02	0
BnaA05G0424100ZS	0.05	0.03	0	0	0	0	0	0	0	1.32	0.14	0.06	0.08	1.02	0	0.24
BnaC05G0476000ZS	0	0	0	0.01	0.02	0.02	0	0	0.02	1.04	0.05	0.01	0.03	0.46	0	0
BnaA05G0422700ZS	0.99	0.91	0.77	0.78	0.81	0.89	0.77	0.73	0.93	0.73	0.67	0.9	0.78	0.28	0.75	0.83
BnaC05G0474700ZS	1.1	0.96	0.81	0.78	0.84	0.93	0.77	0.72	0.92	0.74	0.81	0.98	0.85	0.28	0.76	0.83
BnaA01G0361600ZS	0	0	0.01	0	0	0	0	0	2.8	0.01	0	0	0.01	0.02	0	0
BnaC01G0451600ZS	0	0	0	0	0	0	0	0	2.76	0.01	0	0	0.01	0.04	0	0
BnaA05G0416800ZS	0.77	0.86	1.07	1.1	1.09	0.99	1.23	1.23	1.24	0.96	0.61	0.41	0.45	0.08	1.16	0.92
BnaC05G0468400ZS	0.67	0.79	1.12	1.15	1.13	0.97	1.31	1.3	1.15	0.93	0.52	0.37	0.42	0.02	1.16	0.77
BnaC01G0448900ZS	0.79	0.66	0.54	0.52	0.54	0.55	0.36	0.43	0.6	0.38	0.16	0.1	0.11	0.01	0.6	0.53
BnaA05G0415800ZS	1.06	0.97	1.02	1.02	1.1	1.15	1.03	1.19	1.12	0.99	1.03	1.08	1.13	0.26	0.98	1.05
BnaC05G0467900ZS	1.19	1.03	1.13	1.21	1.2	1.26	1.26	1.18	1.14	1.1	1.15	1.26	1.17	0.33	0.99	1.14
BnaA01G0358400ZS	0.58	0.61	0.5	0.49	0.47	0.6	0.4	0.49	0.74	0.79	0.66	0.7	0.69	0.69	0.48	0.52
BnaC01G0445600ZS	0.61	0.6	0.5	0.43	0.46	0.52	0.43	0.54	0.67	0.71	0.62	0.73	0.66	0.5	0.44	0.66
BnaA01G0357100ZS	0.03	0	0	0	0	0	0	0	1.08	0.11	0	0	0	0	0	0
BnaA05G0412600ZS	0	0	0	0	0	0	0	0	0.9	0.03	0	0.04	0.06	0	0.06	0
BnaC01G0443900ZS	0.06	0	0	0	0	0	0	0.02	1.13	0.09	0	0	0	0	0.04	0
BnaC05G0464600ZS	0.25	0.06	0	0	0	0.02	0	0.02	0.33	0	0.01	0.03	0.02	0.01	0.36	0
BnaA01G0356600ZS	0	0.02	0.01	0	0	0	0	0	0.16	0.06	0	0	0	0.01	0	0
BnaA03G0336200ZS	0	0.05	0	0.01	0.01	0	0.08	0.24	0.62	0.27	0.03	0.01	0.03	0	0	0
BnaA05G0412000ZS	0	0.01	0	0.01	0.01	0	0	0.13	1.13	0.45	0	0	0	0	0.01	0
BnaC03G0403500ZS	0.05	0.01	0.25	0.13	0.23	0.16	0.04	0.3	0.14	0	0.01	0	0	0.02	0	0
BnaC01G0443400ZS	0	0.09	0.03	0.02	0.02	0.01	0.01	0.05	0.44	0.11	0	0	0	0	0.01	0
BnaC05G0463800ZS	0.08	0.17	0.03	0.02	0.02	0.02	0.05	0.23	1.02	0.4	0.03	0	0	0	0.01	0
BnaA03G0337600ZS	0.95	0.82	0.65	0.67	0.68	0.76	0.87	0.97	0.62	0.97	1.08	1.22	1.27	1.3	0.74	0.75
BnaC03G0405400ZS	0.87	0.89	0.67	0.68	0.71	0.76	0.78	0.88	0.61	0.84	1.06	1.14	1.2	0.99	0.85	0.94
BnaA05G0403600ZS	0.61	0.42	0.31	0.33	0.33	0.34	0.81	0.83	0.98	0.61	0.4	0.71	0.17	0	0.84	0.85
BnaC05G0452900ZS	0.58	0.29	0.32	0.31	0.33	0.37	0.67	0.67	0.93	0.58	0.26	0.53	0.09	0.02	0.66	0.7
BnaA01G0351100ZS	0.2	0.29	0.07	0.03	0.07	0.15	0.17	0.16	1.15	1.05	0.17	0.1	0.05	0	0.21	0.08
BnaA03G0339700ZS	0.06	0.11	1.03	1.02	1.01	1.19	0.97	0.8	1.38	1.67	0.64	0.87	0.17	0.02	0.03	0.22
BnaA05G0402900ZS	0.54	0.6	1.36	1.33	1.39	1.4	1.33	1.19	1.56	1.65	1.24	1.43	0.37	0.03	0.59	0.78
BnaC03G0408900ZS	0.1	0.24	1	1.03	1.04	1.28	0.87	0.76	1.63	1.61	0.93	1.14	0.23	0.02	0.28	0.43
BnaC05G0452400ZS	0.79	0.94	1.68	1.66	1.72	1.79	1.46	1.18	1.65	1.82	1.5	1.74	0.65	0.06	1.31	1.14
BnaC03G0412800ZS	0.46	1.38	0.94	0.92	0.88	1.45	1.31	1.57	0.58	1.54	1.01	1.51	1	0.37	2.08	1.79
BnaA05G0394500ZS	1.05	1.02	1.14	1.16	1.16	0.99	1.52	1.45	1.04	0.81	0.68	0.67	0.61	0.07	1.26	0.92
BnaC05G0441200ZS	1.13	1.05	1.14	1.18	1.19	1.09	1.49	1.36	1.1	0.96	0.87	0.83	0.8	0.09	1.37	1.01
BnaA01G0340800ZS	2.78	2.46	2.16	2.18	2.2	2.39	2.71	2.85	2.27	2.15	2.02	1.96	1.99	1.67	2.2	2.35
BnaA03G0346800ZS	2.28	2.19	1.83	1.81	1.84	1.88	2.35	2.45	2.13	2.07	1.7	1.68	1.64	1.57	2.08	2.03
BnaA05G0389400ZS	0.52	0	0	0	0	0	0	0	0.93	1.78	0.41	0.22	0.14	1.48	0	0
[truncated: 6,705 more rows]
