# Supplementary material for: Genome-scale targeted mutagenesis inBrassica napususing a pooled CRISPR library
Source: HighWire-hosted journal article supplement (doi:10.1101/gr.277650.123), 2023-05-01
Supplement: Supplemental_Datasets.zip [file SgRNA design.xlsx]

## Sheet: Raw data
>>AT1G01040	BnaA08g07060D	BnaA10g00800D	BnaC05g00860D
TCTTGACCACTTCCCTTGTCCGG	X	2	3	0.6667
AGGCGCATTGAACTACAAAGAGG	X	2	3	0.6667
GGACCCTCGAGTATTTCAAATGG	X	2	3	0.6667
GAATACTCGGTGTGTCCCCCAGG	BnaA10g00800D
TCCACCTTATAAACTGTACCAGG	BnaA10g00800D
CTGAAGCCTGCACGAATACTCGG	BnaC05g00860D
GAATACTCGGTGTGTCCCCCAGG	BnaC05g00860D
>>AT1G01070	BnaA09g51490D	BnaA09g51500D	BnaA10g00770D	BnaAnng34470D	BnaC05g00830D	BnaC08g46100D	BnaC08g49790D
AAAGACTCAAGAGAGCACATTGG	X	X	3	X	5	X	X	0.2857
ACATCCAAGAAGCCAGTTCTTGG	X	X	3	X	5	X	X	0.2857
GAAAATAAGGGCCAAAGTGAAGG	X	X	3	X	5	X	X	0.2857
GACCAAAGGAGGAAAATTGAAGG	BnaA09g51490D
GGGCAGAGACGTTAAAGACTGGG	BnaA09g51490D
AGGGCAGAGACGTTAAAGACTGG	BnaA09g51490D
TAACCTAGAGCCGTTATTGTTGG	BnaA09g51500D
ACTAAACGTTGATGCGAAAACGG	BnaA09g51500D
GCTACCACAACAGCCATAGCCGG	BnaA09g51500D
AATAACCTAAATGTTAGCTCCGG	BnaA10g00770D
CCTTTCCAAGATATAAGCGAAGG	BnaA10g00770D
AGTAATCGAGGAGTGGTCTCCGG	BnaA10g00770D
TTATGCATATTAGAGTTCCCAGG	BnaC05g00830D
GATCTTCAACATTCCTGCTTTGG	BnaC05g00830D
TAACCTAGAGCCGTTATTGTTGG	BnaC08g46100D
GAGACCCGTTACTACCACCACGG	BnaC08g46100D
TAACGTTTCTGCCCTTGTAAAGG	BnaC08g49790D
AGGAGGAAAATTGAAGATGCTGG	BnaC08g49790D
AGGGCAGAAACGTTAAAGACTGG	BnaC08g49790D
>>AT1G01120	BnaA09g51530D	BnaA10g00700D	BnaC05g00770D	BnaC05g00780D	BnaC08g46130D
GAATCGCTGCACCGCCCATTCGG	1	X	X	X	5	0.4
TTCGGAAGATGCAGTTACAGAGG	1	X	X	X	5	0.4
AGTTACAGAGGAGCATTGACCGG	1	X	X	X	5	0.4
TTGACTTGGACCTGTCTTGTCGG	BnaA09g51530D
GAACATAACGGCTTCAGCTTCGG	BnaA09g51530D
GGTGTTGACGTTATACCACGTGG	BnaA09g51530D
GCTCGTACTTTGACTTTGACCGG	BnaA10g00700D
CTTGTCGTCGGTTAGAGAGGAGG	BnaA10g00700D
GGATCGCTGCGCCTCCCATACGG	BnaA10g00700D
CTCTGGATTCGTATAATGGCCGG	BnaC05g00770D
TAATGGCCGGTGAAGAATCTTGG	BnaC05g00770D
CAGAGAGCATATCCAACGTTAGG	BnaC05g00770D
CTTGTCGTCGGTTAGAGAGGAGG	BnaC05g00780D
GAACATAACGGCTTCAGCTTCGG	BnaC08g46130D
CCCCGTCGAGTTGGACCGCATGG	BnaC08g46130D
GACTAGCTCGTACTTTGACTTGG	BnaC08g46130D
>>AT1G01280	BnaA10g00600D	BnaC05g00670D	BnaCnng08630D
GGCTTAGCTAACGCCCACAATGG	1	2	3	1
GCCCACAATGGTTTAGCCTTAGG	1	2	3	1
TGCCTAAGGCTAAACCATTGTGG	1	2	3	1
ATGAATACACGTGTCTTTGCAGG	BnaA10g00600D
GTTGGTCGCACGGATTCGTGAGG	BnaA10g00600D
TACAAATGAGCTGCCAATCGTGG	BnaC05g00670D
CACCCTTCCGCTGCCATCGACGG	BnaC05g00670D
ACCCTTCCGCTGCCATCGACGGG	BnaC05g00670D
TACAAATGAGCTGCCAATCGTGG	BnaCnng08630D
ATTTCTTTCTCGCAGCCGTACGG	BnaCnng08630D
>>AT1G01453	BnaA10g00490D	BnaC05g00550D
CAGAAACGACCAACCGTCGTCGG	1	2	1
GAAGCTGCTGGTTCTGAAAGAGG	1	2	1
TGCTGGTTCTGAAAGAGGCAAGG	1	2	1
TGGTTCTGAAAGAGGCAAGGCGG	BnaA10g00490D
AAAGAGGCAAGGCGGACCACGGG	BnaA10g00490D
TGGTTCTGAAAGAGGCAAGGCGG	BnaC05g00550D
AAGAGGCAAGGCGGACCACGGGG	BnaC05g00550D
>>AT1G01470	BnaAnng17910D	BnaCnng23520D
GCTTTCAGTGAACCAGGGTCCGG	1	2	1
CAGAAGTAGTCTTTAAAAGTAGG	1	2	1
AGGATTGGTGACTGAAACTTTGG	1	2	1
GTGAAATTGATCTCGCAGATCGG	BnaAnng17910D
ATCGGAATTGCGTGACCGTAAGG	BnaAnng17910D
AACTTTGGCTAAGTACTCGACGG	BnaCnng23520D
CTAAGTACTCGACGGAGTCACGG	BnaCnng23520D
>>AT1G01480	BnaA10g00470D	BnaC05g00530D
ACCAGCCAGGTTCCGTGCACTGG	1	2	1
GTTCGGAGAAGAGGTGAATGTGG	1	2	1
GCCAGGTTCCGTGCACTGGAAGG	1	2	1
GCCAGGTTCCGTGCACTGGAAGG	BnaA10g00470D
GAATGTGGTGACATTATCCCCGG	BnaA10g00470D
GCCAGGTTCCGTGCACTGGAAGG	BnaC05g00530D
AATCAAGTCAGCGTTGACTTCGG	BnaC05g00530D
>>AT1G01520	BnaA10g00430D	BnaC05g00500D
TAGTGCTGCAACAGTTCTCTAGG	1	2	1
GGATGATTAGCTTTCCTCTTTGG	1	2	1
TTAGCTTTCCTCTTTGGTCGAGG	1	2	1
CCTCGCTGAACGACATCGTATGG	BnaA10g00430D
GTATGGCTCCGTGCAGAAACAGG	BnaA10g00430D
GCTGTAAACTTCATCGAAATTGG	BnaC05g00500D
CTGTAAACTTCATCGAAATTGGG	BnaC05g00500D
>>AT1G01590	BnaCnng08750D
>>AT1G01600	BnaA10g00380D	BnaC05g00460D	BnaCnng08760D
CGGCTCCTCCGTCCAAGACGCGG	1	2	3	1
GCCACGTGTCTCGATCAGAACGG	1	2	3	1
AGCATGTGTTCAAGATTCCTCGG	1	2	3	1
TCGATCTCGTCGAAATTTAACGG	BnaA10g00380D
TCAGAACGGAGCAGATCTCCCGG	BnaA10g00380D
TCCCAGGCAGATTCTCGGTCCGG	BnaC05g00460D
TTGATGAATTTGCCGTCGATCGG	BnaC05g00460D
ATAACTCACCGAAGATCCCGCGG	BnaC05g00460D
AGAACCGGAGCTTAATTCCTCGG	BnaCnng08760D
CACGCTGCTCTATCAGACCAGGG	BnaCnng08760D
>>AT1G01610	BnaA10g00370D	BnaC05g00450D	BnaCnng08770D	BnaCnng74890D
GGGTTCATGAAGAAGAAGTAAGG	1	2	3	4	1
GGAGGATCAATCCACGGAAGAGG	1	2	X	X	0.5
GAAGAGGCTGCCTGCTTCTATGG	1	2	X	X	0.5
TGCTTGCAGTTCATGGCCACAGG	BnaA10g00370D
CAGGGATGGGTGAGAGCATCCGG	BnaA10g00370D
AGGGATGGGTGAGAGCATCCGGG	BnaA10g00370D
CATAGTCCCGTCGAGATCTGCGG	BnaC05g00450D
CCACGTTTACACTCGCTTATCGG	BnaC05g00450D
CGTTTACACTCGCTTATCGGAGG	BnaC05g00450D
TGGGGTCAAGAGCAGTACGGTGG	BnaCnng08770D
CAAGAGCAGTACGGTGGTTAAGG	BnaCnng08770D
TACGGTGGTTAAGGACGTAGAGG	BnaCnng08770D
ATGAGAAAACTCCTCGAGAAAGG	BnaCnng74890D
GGTTCATGAAGAAGAAGTAAGGG	BnaCnng74890D
>>AT1G01640	BnaA04g21030D	BnaA09g51950D	BnaA10g00340D	BnaC04g45000D	BnaC06g15820D	BnaCnng02350D
GATGGTGTCAGAAGGGATGCTGG	BnaA10g00340D
AAGGGATGCTGGCGAGCTCCAGG	BnaA10g00340D
TGGCGAGCTCCAGGATGTCAAGG	BnaA10g00340D
CATAACACCGAGCTTCATCGTGG	BnaC06g15820D
TGTTAAGTGAAGACATAAGTTGG	BnaC06g15820D
CCTACATAGATCTCGTAATAAGG	BnaC06g15820D
>>AT1G01780	BnaA10g00230D	BnaC03g52320D	BnaC05g00310D	BnaC07g35610D	BnaCnng08890D
CACAAGGGTGCCTTTGCAATGGG	1	2	3	4	5	1
TGCATTTGAAGCAAGACTTGTGG	1	2	3	4	5	1
TTGAAGCAAGACTTGTGGTAAGG	1	2	3	4	5	1
ATAGAGGACGCCGTCTAGGGAGG	BnaA10g00230D
TCGACGGCGACCTCTTCGGTTGG	BnaA10g00230D
GCGACCTCTTCGGTTGGCTCCGG	BnaA10g00230D
TCGACGGCGACCTCTTCGGTTGG	BnaC05g00310D
ACTTCTTCAGTGGTCTCCGGAGG	BnaC07g35610D
TGTTACCTGACGCCGTGCGACGG	BnaC07g35610D
CGCCGTGCGACGGTGGTTGGCGG	BnaC07g35610D
ACTTCTTCAGTGGTCTCCGGAGG	BnaCnng08890D
CGCCGTGCGACGGTGGTTGGCGG	BnaCnng08890D
>>AT1G01960	BnaCnng09000D
>>AT1G02050	BnaA04g21720D	BnaC04g45570D
TCGTAAGGGCGAGCTTTGTTCGG	1	2	1
>>AT1G02065	BnaA10g00110D	BnaC05g00110D	BnaC05g00120D	BnaCnng09040D
GGTGGTGGTAGTATCCGGAGTGG	1	X	3	X	0.5
GTGGTGGTAGTATCCGGAGTGGG	1	X	3	X	0.5
GGTAGTATCCGGAGTGGGTTTGG	1	X	3	X	0.5
GGTAGTATCCGGAGTGGGTTTGG	BnaA10g00110D
AGATTGACTGGTGACATTTACGG	BnaA10g00110D
AGACGTCAACTTCAGCCTTGGGG	BnaC05g00110D
CAACTTCAGCCTTGGGGATGAGG	BnaC05g00110D
CGGATCCTCCTGACCATGTCTGG	BnaC05g00110D
GGTAGTATCCGGAGTGGGTTTGG	BnaC05g00120D
TGTCGAATTCCGACAGCAAATGG	BnaCnng09040D
CCCCATTCCCAGCAGCTCGCCGG	BnaCnng09040D
CCCATTCCCAGCAGCTCGCCGGG	BnaCnng09040D
>>AT1G02140	BnaA10g00050D	BnaC05g00070D	BnaCnng09170D
TTGCATTCCTTGAGAACGGCGGG	1	2	3	1
TGCATTCCTTGAGAACGGCGGGG	1	2	3	1
GCATTCCTTGAGAACGGCGGGGG	1	2	3	1
GCATTCCTTGAGAACGGCGGGGG	BnaA10g00050D
GGGTGAGAAACACCTCCTTCCGG	BnaA10g00050D
GCATTCCTTGAGAACGGCGGGGG	BnaC05g00070D
TGCATTCCTTGAGAACGGCGGGG	BnaCnng09170D
AGTTTGAGTTATTGGCGTATCGG	BnaCnng09170D
>>AT1G02190	BnaCnng09190D
>>AT1G02205	BnaC09g16050D	BnaCnng09200D
ACCTCTCTGGCAAAGAGCAGAGG	1	2	1
CTGGCAAAGAGCAGAGGCGATGG	1	2	1
AGTTTCTCTCAGAGACAAAGAGG	1	2	1
TAGAGGTTAAAAGGACCAAACGG	BnaC09g16050D
TCTCTCAGAGACAAAGAGGCTGG	BnaC09g16050D
AGCATGGAGAGAGATGTGAAAGG	BnaC09g16050D
AGCATGGAGAGAGATGTGAAAGG	BnaCnng09200D
GAGATGTGAAAGGCCACAAAAGG	BnaCnng09200D
>>AT1G02390	BnaA10g01090D	BnaC05g01190D
GTCAATAGCAACCGGTACGATGG	1	2	1
CTCTCTACACGTAGTCCCTTCGG	1	2	1
AGTACTTATCTCTTCTCGTGAGG	1	2	1
CTCTCTACACGTAGTCCCTTCGG	BnaA10g01090D
ATCGACAACCCCATTATTACCGG	BnaC05g01190D
GACCACTAGCCGTCGTGCCATGG	BnaC05g01190D
>>AT1G02410	BnaA08g27140D	BnaA09g51320D	BnaA10g01110D	BnaC03g71360D	BnaC04g02490D	BnaC05g01210D	BnaC08g49630D	BnaC09g33330D
CACTGCCGTTGTCTTTGGCATGG	X	X	X	4	X	X	X	8	0.25
CGTTCTATACAATGGCACAGCGG	X	2	X	X	X	X	7	X	0.25
CAACATCGATTTAGCAGCAGCGG	X	2	X	X	X	X	7	X	0.25
CATGGGAGTGACATTGTATGTGG	BnaA08g27140D
GACATTGTATGTGGAGACTCCGG	BnaA08g27140D
TATGTGGAGACTCCGGTTATTGG	BnaA08g27140D
TTATACTGATTGCCATAACGAGG	BnaA09g51320D
GACATTGTACGTCGAGACTCCGG	BnaA09g51320D
GCTAAATCGATGTTGCTTAGTGG	BnaA09g51320D
CAGAAGCAAGATTGGGCTTTGGG	BnaA10g01110D
TCAGAAGCAAGATTGGGCTTTGG	BnaA10g01110D
AGAAGCAAGATTGGGCTTTGGGG	BnaA10g01110D
GACATTGTATGTGGAGACTCCGG	BnaC03g71360D
GCCGTTGTCTTTGGCATGGTTGG	BnaC03g71360D
TATGTGGAGACTCCGGTTATTGG	BnaC04g02490D
TTCTTCTGTCTCTAAAAATAGGG	BnaC05g01210D
CATGGGAATGACATTATATGTGG	BnaC05g01210D
CACCATGCCAAAGACAACGGCGG	BnaC05g01210D
AGACCAAGGAACAAGAGGCACGG	BnaC08g49630D
AAAATGCTCTACTACCTAACTGG	BnaC08g49630D
AAAGCCAGGAGAAAGCGCGCTGG	BnaC08g49630D
GAGATTGTGGTGCCGTTCAATGG	BnaC09g33330D
GTCTCTTTCTTAATCGGTGCTGG	BnaC09g33330D
TGTACTAGTACAAACTGTTGAGG	BnaC09g33330D
>>AT1G02580	BnaA09g51240D	BnaA10g01220D	BnaC05g01310D	BnaC08g43790D	BnaC08g46050D
TGAGACCAATCCGCATGTCCTGG	X	2	3	X	X	0.4
GAACAACTGCGACAAATATCTGG	X	2	3	X	X	0.4
TCACGAGAAATAGAAAAGCAAGG	X	2	3	X	X	0.4
CCACTGTCGCTAGATATGCTAGG	BnaA09g51240D
ATGTCTCACCAAGAGAGCCATGG	BnaA09g51240D
GAACAACTCCGACATTGATCTGG	BnaA09g51240D
ACATTTCCGCTAGTTAAACAAGG	BnaA10g01220D
CATTTCCGCTAGTTAAACAAGGG	BnaA10g01220D
ACATTTCCGCTAGTTAAACAAGG	BnaC05g01310D
TCGAGAGAAAGATAATCCATAGG	BnaC08g43790D
CGAGAGAAAGATAATCCATAGGG	BnaC08g43790D
TCTCGGCGTCGCTATCCCTATGG	BnaC08g43790D
ATGTCTCACCAAGAGAGCCATGG	BnaC08g46050D
>>AT1G02680	BnaA08g27210D	BnaA10g01290D	BnaC05g01350D	BnaCnng71120D
CAGCATATGATGTATGGATTTGG	1	2	3	4	1
CTTCTTGTATCTAATCCGCAAGG	X	X	3	4	0.5
AAGAGGGGTTTGCGTTTCTCCGG	X	2	3	X	0.5
ACACATAAGGCTCAAGAGATTGG	BnaA08g27210D
AGCGCCACAGTCTCTGGAAGCGG	BnaA10g01290D
TACTCCCGTCTGTTCATCTCCGG	BnaA10g01290D
TCGTCGAAATCTAAAGCTACGGG	BnaA10g01290D
AGCGCCACAGTCTCTGGAAGCGG	BnaC05g01350D
GAGTAGCACACCAGGAGCAACGG	BnaC05g01350D
TAGCACACCAGGAGCAACGGCGG	BnaC05g01350D
CAGCATATGATGTATGGATTTGG	BnaCnng71120D
>>AT1G02780	BnaA03g26260D	BnaA08g27220D	BnaA09g00680D	BnaA09g51180D	BnaA10g01380D	BnaC02g28080D	BnaC03g31010D	BnaC05g01420D	BnaC05g36560D	BnaC08g45990D	BnaCnng23290D	BnaCnng48720D
AGAGTTGGCCATGGAGATGTCGG	X	X	X	X	5	X	X	8	X	X	X	X	0.1667
GTTGGCCATGGAGATGTCGGAGG	X	X	X	X	5	X	X	8	X	X	X	X	0.1667
GAGATGTCGGAGGATTCATTCGG	X	X	X	X	5	X	X	8	X	X	X	X	0.1667
TAGACAGGTGGTGCAGCGGCAGG	BnaA03g26260D
AGTCGGTAGCCTCGCCTCCCTGG	BnaA03g26260D
CGAAGATCCACTCACGCTCCAGG	BnaA03g26260D
GGAAGGGTACCCGTGAAGCTAGG	BnaA08g27220D
GTCGGTGATGAAGTGCGGGAAGG	BnaA08g27220D
GCAGGGGCAACATCTCCTCCAGG	BnaA08g27220D
GCAGGTATATCTCCTCCTCCAGG	BnaA09g00680D
AGTCCAAGGCTGAGAAGGCTAGG	BnaA09g00680D
GGTTCGCGCAGTCGGTGCAGCGG	BnaA09g00680D
TAGTAGGCAACCTAGCTTCACGG	BnaA09g51180D
GAGATGTCTTGAGATTCATTCGG	BnaA09g51180D
AGTAGGCAACCTAGCTTCACGGG	BnaA09g51180D
TGAATCCTCCGACATCTCCATGG	BnaA10g01380D
TGAGGAGGATGAGAGTGTTGAGG	BnaC02g28080D
CTGAGGCTGCGAGCCGCTTCTGG	BnaC02g28080D
CTCATCCACAACACCTTTGTCGG	BnaC02g28080D
TAGGCAGGTGGTGCGGCGGCAGG	BnaC03g31010D
TGAAGATCGCCAAGATGAAGGGG	BnaC03g31010D
CTCAGTGCTCAAGTGCGGCAAGG	BnaC03g31010D
TGAATCCTCCGACATCTCCATGG	BnaC05g01420D
AGCTAAACGTTCCTTCTTTCTGG	BnaC05g36560D
GGGACATTCCTTGGGAGTAGCGG	BnaC05g36560D
TGGGTGTTTCAACGTCACTCTGG	BnaC05g36560D
AGCTGGTGGTGCAGTTGCAGGGG	BnaC08g45990D
AATTGGCCATGGAGATGTCATGG	BnaCnng23290D
GAGATGTCATGGCTTTCGTTAGG	BnaCnng23290D
CTTTCCGCACTTCATCACTGAGG	BnaCnng23290D
AGCTGGTGGTGCAGTTGCAGGGG	BnaCnng48720D
GCAGGGGCAACATCTCCTCCAGG	BnaCnng48720D
>>AT1G02820	BnaA10g01410D	BnaC05g01450D
AGAACAGCTCGTAGCTCCGCCGG	1	2	1
GCTCCCATGCAACGCCGTGTCGG	1	2	1
CAACGCCGTGTCGGCTGCGACGG	1	2	1
GGTAGCGGGTCTGTAGTAACCGG	BnaA10g01410D
GCAGCCGACACGGCGTTGCATGG	BnaA10g01410D
CAGCCGACACGGCGTTGCATGGG	BnaA10g01410D
GAACTCTCCGGCCACGATGACGG	BnaC05g01450D
CGGGTCAATCTCTTGAGAAACGG	BnaC05g01450D
>>AT1G03050	BnaA02g20710D	BnaA08g27320D	BnaA09g51020D	BnaA10g01640D	BnaA10g01650D	BnaC05g01670D	BnaC05g01680D	BnaC08g00120D	BnaC08g45820D
CCATTAGCCGTTGCTGGTGCTGG	X	X	X	X	5	X	7	X	X	0.2222
TGGTGCTGGAAGTGCCAGCATGG	X	X	X	X	5	X	7	X	X	0.2222
TGAGGTGTGTAGGAGTAACTAGG	X	X	X	X	5	X	7	X	X	0.2222
TCTTCTTCGCTACTCGCCGTGGG	BnaA08g27320D
GTGCAAAACTCAACGGCTTATGG	BnaA08g27320D
ATCTTCTTCGCTACTCGCCGTGG	BnaA08g27320D
CGGCCCATTGCTGCTTCCATTGG	BnaA09g51020D
GTGTGTAAGAGTAATTAGGCTGG	BnaA09g51020D
AGGTGCAGGTAAGGCCTTGATGG	BnaA09g51020D
GACTTTGGCTAGACCGACGCTGG	BnaA10g01640D
TTGGTCCTTCACGGCTCCTATGG	BnaA10g01640D
GCCTCAACAAAACCAAATGCTGG	BnaA10g01640D
TCCGCTAGCTCCATAAGCCGTGG	BnaA10g01650D
GCTAGCTCCATAAGCCGTGGAGG	BnaA10g01650D
CAAACGAGGCACGGGAAACGTGG	BnaA10g01650D
TTGGTCCTTCACGGCTCCTATGG	BnaC05g01670D
TCCGCTAGCTCCATAAGCCGTGG	BnaC05g01680D
CAGTTACATCGTAATATATCTGG	BnaC05g01680D
AGCGCTACGACCGTTGACTTTGG	BnaC08g00120D
CGGCCCATTGCTGCTTCCATTGG	BnaC08g45820D
GTGTGTAAGAGTAATTAGGCTGG	BnaC08g45820D
>>AT1G03150	BnaA08g27350D	BnaA10g01730D	BnaC05g01770D	BnaC08g00130D
TAACCCATGACGCGATTGCCAGG	X	2	3	X	0.5
TGCCAGGACCTTCAGCGACATGG	X	2	3	X	0.5
TCAGCGACATGGAAATAATCAGG	X	2	3	X	0.5
ACATGACCTACTTGGCGAGATGG	BnaA08g27350D
TGCCAGGACCTTCAGCGACATGG	BnaA10g01730D
AGTTGCTGCCTGCGATATTCTGG	BnaC05g01770D
TGCCAGGACCTTCAGCGACATGG	BnaC05g01770D
>>AT1G03170	BnaA08g27370D	BnaA10g01740D	BnaC05g01780D	BnaC08g00150D
GCGACTCATCGTTGCTTTCTTGG	X	2	3	X	0.5
TTGAGGTTTCGAATGAGCCCTGG	X	2	3	X	0.5
CGAATGAGCCCTGGAGATAGCGG	X	2	3	X	0.5
AGATGTGCACTGAGAGCCTCGGG	BnaA08g27370D
AGCAGCAGATGCAAGGAGAATGG	BnaA08g27370D
GAGATGTGCACTGAGAGCCTCGG	BnaA08g27370D
CGAATGAGCCCTGGAGATAGCGG	BnaA10g01740D
ACCACTCTCGCTTCCTGTCTCGG	BnaA10g01740D
TCAACGAACTTTATCGGTGGCGG	BnaC05g01780D
CAACGAACTTTATCGGTGGCGGG	BnaC05g01780D
AGCAGCAGATGCAAGGAGAATGG	BnaC08g00150D
GAGATGTGCACTGAGAGCCTTGG	BnaC08g00150D
CTTCTTCTTCTTCTTCCTCATGG	BnaC08g00150D
>>AT1G03470	BnaA09g50930D	BnaA10g01950D	BnaC08g45690D	BnaC08g45700D	BnaCnng43150D
AGAAGCTTGAAGGGTTGTTTGGG	X	2	X	X	5	0.4
ACGGTAGAAATCTTCGACCATGG	1	X	3	X	X	0.4
TCGACCATGGCAACAAGCTCAGG	1	X	3	X	X	0.4
GAGAGAGTAGAATGAAGCCAAGG	BnaA09g50930D
ATTCCCACCATAATCGACTGAGG	BnaA09g50930D
CGCATCGCTCCTTAGCCGAGAGG	BnaA10g01950D
TCGCAACAAGTCGTGCCTCTCGG	BnaC08g45690D
CGGCTAAGGAGCGATGCGAACGG	BnaC08g45690D
GTCATGAGTCTCACAAGCCTCGG	BnaCnng43150D
AGAAGCTTGAAGGGTTGTTTGGG	BnaCnng43150D
>>AT1G03650	BnaA09g50900D	BnaC08g45570D	BnaC08g45670D
AAACAGAGTCATCAAAATCAAGG	1	2	3	1
TGAGCGAGAGATTCGTGTTTAGG	1	2	3	1
GAGCGAGAGATTCGTGTTTAGGG	1	2	3	1
ATATCCCAAAGTCTCTCCGTCGG	BnaA09g50900D
GCAAACCGGCGTTTCTCTTGCGG	BnaA09g50900D
CACGATCTCTTCCACCACTCTGG	BnaA09g50900D
CACGATCTCTTCCACCACTCTGG	BnaC08g45570D
GACCCTCTAGTTAGTTCTACCGG	BnaC08g45570D
ATTCACAGCAGCAATCCTCGTGG	BnaC08g45670D
TTCACAGCAGCAATCCTCGTGGG	BnaC08g45670D
TCACAGCAGCAATCCTCGTGGGG	BnaC08g45670D
>>AT1G03790	BnaA08g27570D	BnaA10g02150D	BnaC05g02070D	BnaC08g00330D
GGAAGAACCCTAAGCTGACGTGG	1	2	3	4	1
ACGACGGCGAGCTTTCTCTCCGG	1	2	3	4	1
CGACGGCGAGCTTTCTCTCCGGG	1	2	3	4	1
TTGTTCCAGTTATGTTTACGCGG	BnaA08g27570D
TTTACGCGGCGAAGAACGAGGGG	BnaA08g27570D
CTCATTCGCCACGTCAGCTTAGG	BnaA08g27570D
ACGCTGAGTGCTCAAACCGCAGG	BnaA10g02150D
GCTGCCGCAGAAACAGGCGAAGG	BnaA10g02150D
CATTCACCCATCCAATATCAGGG	BnaA10g02150D
ATTGGTTAGGTAGCTTGGAGAGG	BnaC05g02070D
GGCGAGAGCGCGAATTGTAAAGG	BnaC05g02070D
GACGACTGTGAGTTTGCTCATGG	BnaC08g00330D
CAAACTCACAGTCGTCTCCACGG	BnaC08g00330D
>>AT1G03880	BnaA10g02240D	BnaC05g02160D
CCACTGGAACTGTTGGCTTGTGG	1	2	1
CTAGGCATACCGTAGCCCATAGG	1	2	1
TTCACGACCGCGAAGCCTTGTGG	1	2	1
CTAGGCATACCGTAGCCCATAGG	BnaA10g02240D
CACGACAAGTAACTGTCCCTGGG	BnaA10g02240D
CTAGGCATACCGTAGCCCATAGG	BnaC05g02160D
CACGACAAGTAACTGTCCCTTGG	BnaC05g02160D
>>AT1G04220	BnaA08g27750D	BnaA10g02480D	BnaC05g02350D	BnaCnng41340D
TCATGAATCTCATCGATCCATGG	1	2	3	4	1
GCCCTAAACCGGAACGTTCGAGG	X	X	3	4	0.5
TCCTCGAACGTTCCGGTTTAGGG	X	X	3	4	0.5
TCAAGTGTAATAGTGCGGTTTGG	BnaA08g27750D
GCGTTGGTAAACGCAGTTAAAGG	BnaA10g02480D
ATACTTTGAGCGGCGGCGGTCGG	BnaA10g02480D
CTTTGAGCGGCGGCGGTCGGAGG	BnaA10g02480D
GATGACACTAGAGATACCCTCGG	BnaC05g02350D
CAAGACGAGAGGTCCAAGCGTGG	BnaC05g02350D
GGCGATAGCCATTAGGTTCTTGG	BnaC05g02350D
GAACGGCGGCGCCGCCCATTCGG	BnaCnng41340D
GGGACACGTAAGAGAGCCTCCGG	BnaCnng41340D
>>AT1G04400	BnaA08g27870D	BnaA10g02550D	BnaC05g02520D	BnaC08g00670D
CTCTCTCCCTATCTCCACTTCGG	1	2	3	4	1
ACGAGTTCTTGATATGGCTTTGG	1	X	X	4	0.5
AGAGCTAGGACTAGAAAACGAGG	1	X	3	X	0.5
TCATCTTCGTTTCTTCCCTTGGG	BnaA08g27870D
AAGATATGTAAGTTTACCGCAGG	BnaA10g02550D
AAGGACTGCTCGTGAGTAAAAGG	BnaA10g02550D
AGGACTGCTCGTGAGTAAAAGGG	BnaA10g02550D
CGATCAAGCTCGTGGCCATCAGG	BnaC05g02520D
GTGGCCATCAGGTAAGCTCCCGG	BnaC05g02520D
TTCCCCATTTCCACGGAAGAAGG	BnaC05g02520D
CTCATCCCAGCATCCACCAACGG	BnaC08g00670D
>>AT1G04450	BnaA08g27910D	BnaAnng12160D	BnaC08g00710D	BnaC08g50090D
CATCGGTGGGAAACCCGATCTGG	1	2	3	4	1
TCGCGTCATAGGAAGGTGAAAGG	1	2	3	4	1
CCATCATTACATACATCGACCGG	X	2	X	4	0.5
CATAGGAAGGTGAAAGGATCAGG	BnaA08g27910D
CATAGGAAGGTGAAAGGATCCGG	BnaAnng12160D
AAGGTGAAAGGATCCGGAGGAGG	BnaAnng12160D
AGGAAGGTGAAAGGATCCGGAGG	BnaAnng12160D
AAGCAGCAACGCTTCAACGTCGG	BnaC08g50090D
AAGGTGAAAGGATCAGAAGGAGG	BnaC08g50090D
AGGAAGGTGAAAGGATCAGAAGG	BnaC08g50090D
>>AT1G04550	BnaA10g02680D	BnaAnng12210D	BnaC05g02660D	BnaC08g50150D
GCTCGTTTAGACCCAACAGAAGG	1	2	3	4	1
GAGGAGAAGCTCCTTGTCCTTGG	1	X	3	X	0.5
TTCATCCTGTGTGACCCAATCGG	1	X	3	X	0.5
GGATTAGGGCTCAGCATAGGCGG	BnaA10g02680D
TGGGTCACACAGGATGAACAAGG	BnaA10g02680D
GCTCAGGAAGAGTAATCTTCCGG	BnaAnng12210D
TGTCTCAGTGAAGGTAGTTGAGG	BnaAnng12210D
GTCTCAGTGAAGGTAGTTGAGGG	BnaAnng12210D
AGCTCCTTGTCCTTGGTTAGGGG	BnaC05g02660D
GCTCACTTTCAGCCGGAAGAAGG	BnaC05g02660D
CTTTGGCCGCCTTCATAGCTTGG	BnaC05g02660D
GGTGGGTCAGAGTTTGAGCTGGG	BnaC08g50150D
CTTAGGATCATGGGCACCTCAGG	BnaC08g50150D
CTAGGACTCAGCCTCGGCAGTGG	BnaC08g50150D
>>AT1G04580	BnaA10g02720D	BnaC05g02700D
GGTGCAGCGACAGAGGTTTCCGG	1	2	1
TTTGGGATTGTGTCTATTGTAGG	1	2	1
GTTATGTGCGTTTGAAAGAGCGG	1	2	1
CCAAATCAACAGCAGGATTAAGG	BnaA10g02720D
ATTCTTAACGTGATAGACGATGG	BnaA10g02720D
TTCACCACCGGCATAATCGCTGG	BnaA10g02720D
AAAGCGACAAGATCTTTATCAGG	BnaC05g02700D
TCTTTATCAGGATCGTAAGGAGG	BnaC05g02700D
AGACTTCTCCGCTGCAGAAGCGG	BnaC05g02700D
>>AT1G04870	BnaAnng21610D	BnaAnng36410D	BnaCnng71640D
GGTGTGCCTATCACTTGAAGTGG	1	2	3	1
TTGAATCCACTTCAAGTGATAGG	1	2	3	1
AATGTAACCTCAGTCATCAATGG	1	2	3	1
AGTGTGCCCATTGATGACTGAGG	BnaAnng21610D
CTTCTTCCGTTCTGACAAAGTGG	BnaAnng21610D
TCTGACAAAGTGGATTTGATGGG	BnaAnng21610D
GTTCTGTCCATTGATGACTGAGG	BnaAnng36410D
CGGTTCCGGCAGCACTGATTCGG	BnaAnng36410D
TCCGGCAGCACTGATTCGGCAGG	BnaAnng36410D
ATGGCTGATCCTATAAATGTTGG	BnaCnng71640D
TGGCTGATCCTATAAATGTTGGG	BnaCnng71640D
>>AT1G04880	BnaA08g28100D	BnaA09g50510D	BnaA10g03020D	BnaC05g02890D	BnaC08g01020D	BnaC08g44000D
GCAATCTCTACATTCTGCTCAGG	X	2	X	X	X	6	0.3333
TCAGGAAGCCTCTGCTGCAACGG	X	2	X	X	X	6	0.3333
AAGTTATAACCGCTTCTGTTAGG	X	2	X	X	X	6	0.3333
CTGTCCTTACCAGGGTTAAGAGG	BnaA08g28100D
GCAGGATGATTGGTGAGCTCTGG	BnaA08g28100D
AAGTTATAACCGCTTCTGTTGGG	BnaA08g28100D
GCCTCTTCAGCTTTCTTCACCGG	BnaA09g50510D
GCTGATCTCCCTATCTTTACCGG	BnaA09g50510D
CTATCTTTACCGGGATGCAGCGG	BnaA09g50510D
GGAGGTCTTATCACAAGTCCTGG	BnaA10g03020D
GAAGCCGCTTAACCCTGGTAAGG	BnaA10g03020D
AAGTAACGCTGTTCCGTTGCAGG	BnaA10g03020D
CCACTTCAGGATCAGAAGGGTGG	BnaC05g02890D
AGCAACCATCACAGCATCGCCGG	BnaC05g02890D
CTGTCCTTACCAGGGTTAAGCGG	BnaC05g02890D
TTACCTTGTAACTGTGACAATGG	BnaC08g01020D
TACCTTGTAACTGTGACAATGGG	BnaC08g01020D
ATCCCATTGTCACAGTTACAAGG	BnaC08g44000D
GCTCCCCCCTGCATAAGCCCTGG	BnaC08g44000D
ATAAGCCCTGGTGCACCAGATGG	BnaC08g44000D
>>AT1G04950	BnaA08g28140D	BnaA10g03090D	BnaC05g02960D	BnaC08g01080D
CGAACACGATACTCAACATCAGG	1	2	3	4	1
TGCCTTGTATCGAGAAAGCTTGG	1	2	3	4	1
TCCTTTGCGTTTCTGCTTTCAGG	X	2	3	X	0.5
TAAGGTTCTATGTGTATATGAGG	BnaA08g28140D
TGTACCTAAGGAAACGATTGAGG	BnaA08g28140D
ATCTCTGTAGAAGGGATGAAAGG	BnaA10g03090D
TGCTTCTCAGCATCCAATTCTGG	BnaA10g03090D
TTGCTTTCCGGGTAATAGTCCGG	BnaC05g02960D
ATCTCTGTAGAAGGGATGAAAGG	BnaC05g02960D
TTCCAAGCTTTCTCGATACAAGG	BnaC08g01080D
GATTACCAATTTGTCACCTGAGG	BnaC08g01080D
>>AT1G05190	BnaA09g50400D	BnaA10g03220D	BnaAnng34360D	BnaC02g12270D	BnaC05g03230D
TTGATGAGCTCAACTTCGCGTGG	X	2	X	X	5	0.4
TGATGAGCTCAACTTCGCGTGGG	X	2	X	X	5	0.4
GTCTTGACCTTCCAATGCAATGG	X	2	X	X	5	0.4
TGCTAATGCGATCGTTACATTGG	BnaA09g50400D
GAGAAACCCACTTGAGTAAATGG	BnaA09g50400D
AACACCACCATTTACTCAAGTGG	BnaA09g50400D
TTCCAATGCAATGGTTACATTGG	BnaA10g03220D
TAACCGGGTGAGAAAACCCGAGG	BnaA10g03220D
AACCATCGCATTAGAAGGTCAGG	BnaAnng34360D
GGGTGTTGGTTACCGTGCAACGG	BnaAnng34360D
AAGAGCTGGTACTGAACCTGGGG	BnaAnng34360D
GGATATGACAAGTGTGAGATTGG	BnaC02g12270D
GATATGACAAGTGTGAGATTGGG	BnaC02g12270D
AGAAGACTCCGGTTTCTTGAGGG	BnaC02g12270D
GTTAGCCCTTCTAGTTTCGACGG	BnaC05g03230D
GAGTAACCCACTTGAGCTGAAGG	BnaC05g03230D
ACCCACTTGAGCTGAAGGCGTGG	BnaC05g03230D
>>AT1G05260	BnaA10g03290D	BnaAnng16310D	BnaC05g03300D	BnaC08g44090D	BnaC08g44140D
TTCACTCTCTCTGTTTCTTGTGG	1	2	3	4	5	1
TCACTCTCTCTGTTTCTTGTGGG	1	2	3	4	5	1
ACTTGAGATTGGCTGCGTATTGG	X	2	X	X	5	0.4
CTCGGCGTTAGGACAAGTATTGG	BnaA10g03290D
ACAGACCTCTACGCTTGAGAAGG	BnaA10g03290D
ACGCAGCAAATCTCAAGTCTAGG	BnaA10g03290D
TCGTGTTATCGTTGAGGCTAGGG	BnaAnng16310D
AGCCAAACCCTCTAACCGTTAGG	BnaAnng16310D
GAAACAGACCCCTACGCTTGAGG	BnaAnng16310D
CGTTAGGACAAGTATTGGCGTGG	BnaC05g03300D
AGCCAAACCCTCTAACCGTTAGG	BnaC08g44090D
AGTTCATCTGCAACTGAGCTTGG	BnaC08g44090D
ATCTGCAACTGAGCTTGGATTGG	BnaC08g44090D
GGTCAGCTGGAGTGGTTAGAAGG	BnaC08g44140D
CCACCGACCCCTTCAAGAGCTGG	BnaC08g44140D
>>AT1G05320	BnaAnng16240D	BnaAnng19560D	BnaC05g03410D	BnaC08g44210D
AAAGAGCTTGAGAAAGAAAATGG	1	2	3	4	1
GACGGTCGATGTTTCTGTTAAGG	1	2	3	4	1
CTTGGCTATTCTCTTCTGCAAGG	1	X	X	4	0.5
CAGCAACTTCAGATACTTCTAGG	BnaAnng16240D
CAAGTGCACCTTTCACTACATGG	BnaAnng16240D
GTTTAGACTTCTCTACTCCGAGG	BnaAnng16240D
CCGCAACTCTCGCTGATGATTGG	BnaAnng19560D
GAGTACTCAGCGCTGCCTTGAGG	BnaAnng19560D
CTTTCTGCAAAGCTGTCCTCAGG	BnaAnng19560D
CTCAAGTATCTCTTCAGACTCGG	BnaC05g03410D
CTGAGATCCTCGCTGACGATTGG	BnaC05g03410D
TAGCTTTCAGCTTCTGTTCAAGG	BnaC05g03410D
CTCTTACGTTGCTTTGGAGTTGG	BnaC08g44210D
TGCTGGATTAAGGGAAAGCGAGG	BnaC08g44210D
>>AT1G05380	BnaA10g03550D	BnaC05g03470D
CGGCTTGGAAACCGTGTCCATGG	1	2	1
AACTGGTGTACATATAGGACTGG	1	2	1
ATCATCAGCGACATGTCCATTGG	1	2	1
CATGAACTCATCACTCGACTCGG	BnaA10g03550D
AACTGGTGTACATATAGGACTGG	BnaA10g03550D
CGATTCACCATTCTCCGGCTTGG	BnaC05g03470D
CTGTCACTGTCTTTACATGAAGG	BnaC05g03470D
>>AT1G05450	BnaA09g50330D	BnaA10g03620D	BnaC05g03540D	BnaC08g44290D
ATGGCTAGAGTTCGGTTAATAGG	1	X	3	X	0.5
AAGATCGAGTGGCACGTTTGCGG	1	X	X	4	0.5
GAGAGCATGGTTGGTGAACATGG	1	X	X	4	0.5
ACGGGGACACCACATGCACGAGG	BnaA09g50330D
GCTGAGATTAGGAATGATTTGGG	BnaA09g50330D
TCAGGAGTTATCGAACTTGATGG	BnaA10g03620D
TTGCATTTAACGGGGACACCAGG	BnaA10g03620D
CCAGGCATGCCACATGCACGAGG	BnaA10g03620D
TGTTCGATGCGGGAATATTCTGG	BnaC05g03540D
TTGCGTTTCTGTAGGAGGAGTGG	BnaC05g03540D
AGGCCCTGCTTCTTTCGGTCCGG	BnaC08g44290D
TGAGCAAGACTCATCAGTATTGG	BnaC08g44290D
>>AT1G05470	BnaA09g50320D	BnaA10g03640D	BnaC05g03560D	BnaC08g44300D
GTGTTCAAAGGATGGAACGAAGG	1	2	3	4	1
TGGAGATGACTTGCATCCCAAGG	1	2	3	4	1
TCCAGTTCTGCATAGGGCTTTGG	1	X	X	4	0.5
TGCATAGGGCTTTGGCAGATCGG	BnaA09g50320D
AACGCTCTCCAGTTCTGCATAGG	BnaA09g50320D
CCAGTTCTGCATCTCAACGAGGG	BnaA10g03640D
TGTGACTGCTGCTGCCACCACGG	BnaA10g03640D
CTGCTGCCACCACGGAAGCTAGG	BnaA10g03640D
GCTGAGCTCGGTGTAGCCACGGG	BnaC05g03560D
TTCTCGTTTGCCGCAGAGCCTGG	BnaC05g03560D
TGCATAGGGCTTTGGCAGATCGG	BnaC08g44300D
AGGGGACTTGTCGTCTTCTGAGG	BnaC08g44300D
>>AT1G05510	BnaA10g03690D	BnaC01g31100D	BnaC05g03600D
TAGATAAAGAGAGAGAGTCAAGG	1	2	3	1
AGATAAAGAGAGAGAGTCAAGGG	1	2	3	1
ACTCTTGGAACAGACTCTACAGG	X	2	3	0.6667
TAATATTAGGCAAACCAATGGGG	BnaA10g03690D
TCTTGGCGTTGGATTGGCTCGGG	BnaA10g03690D
TGGATTGGCTCGGGAACACCGGG	BnaA10g03690D
AACAAAACTCTTCGGCAATGCGG	BnaC01g31100D
ACAAAACTCTTCGGCAATGCGGG	BnaC01g31100D
ACTCTTCGGCAATGCGGGTAAGG	BnaC01g31100D
CTTTCTCGAGATCTTGGCGTTGG	BnaC05g03600D
>>AT1G05560	BnaA10g03720D	BnaC05g03640D	BnaC05g03670D
GACAAAGATGAGTGTTCAAAAGG	1	2	3	1
GCGGTTGAAGCGGGTAGAGAAGG	1	2	3	1
GTTGAAGCGGGTAGAGAAGGTGG	1	2	3	1
AACATCTCCGAAGGAAGTAAAGG	BnaA10g03720D
ACGTGTTAACGAGAATCTTCGGG	BnaA10g03720D
GGTTTGTGTTAGCAGGCGTGAGG	BnaA10g03720D
CAACCTCTCATCCATCAAGATGG	BnaC05g03640D
AAACTGTGATAGTCTTGCGTTGG	BnaC05g03640D
TGCGTTGGATTTCATGCCGGTGG	BnaC05g03640D
ACCGCCACCATTCCGACACGCGG	BnaC05g03670D
>>AT1G05600	BnaA10g03810D	BnaC05g03720D
CTTCCCTTCCTCGAAAAGATCGG	1	2	1
CTCGAAAAGATCGGTAGCCATGG	1	2	1
GAAAAGATCGGTAGCCATGGCGG	1	2	1
CTCGAAAAGATCGGTAGCCATGG	BnaA10g03810D
GGCGGTATAGCTCTCCAAACTGG	BnaA10g03810D
GCTTTCCACACAGAAGATTCAGG	BnaC05g03720D
>>AT1G05630	BnaA08g28320D	BnaA09g50250D	BnaA10g03830D	BnaC05g03750D	BnaC08g01360D	BnaC08g44370D
ATAACTCTGTCACACCATGCAGG	1	2	3	4	5	6	1
CAATGGTGGATTGATGCAATTGG	1	2	3	4	5	6	1
AAGGAGATTAGAACACATGTTGG	1	2	3	4	5	6	1
GAACTCCGGGAGCGGCTCGACGG	BnaA08g28320D
CTTGTACGGAGACGCAGCTCTGG	BnaA08g28320D
GGCTGTGCTTGCGGATCTGGTGG	BnaA08g28320D
ACTTGGCTCCTGAGGTCAATGGG	BnaA09g50250D
AGGACCACGATGAGCTAGCCAGG	BnaA09g50250D
GCGGATCCATCTTCCAAGCCCGG	BnaA09g50250D
TTACCCCGTCTAGTATCCGTTGG	BnaA10g03830D
CCCGTCTAGTATCCGTTGGATGG	BnaA10g03830D
TGCTGCTGCTAAATCAGACTTGG	BnaA10g03830D
ACGGCGTCGTCCCCAATATTAGG	BnaC05g03750D
ATTAGGAGGAGGAGTGACGACGG	BnaC05g03750D
GGCTGTGCTTGCGGATCTGGTGG	BnaC08g01360D
TGCTTGCGGATCTGGTGGTGCGG	BnaC08g01360D
GTCGGGAGGAGGCGTGACGACGG	BnaC08g44370D
TGCTCCTCACCGTCTTCTCGAGG	BnaC08g44370D
GGTTTAATTATCCCGGATGCTGG	BnaC08g44370D
>>AT1G06040	BnaA08g28420D	BnaA09g50090D	BnaA10g03990D	BnaC08g01640D	BnaC08g44590D
CTTGGCAGATATCGCAACGAGGG	1	2	X	X	X	0.4
GATATCGCAACGAGGGAACTTGG	1	2	X	X	X	0.4
TCCCAGTGGCTAAGAACCTCTGG	X	X	3	4	X	0.4
AGGATAGAGCTCTGCTTTGCAGG	BnaA08g28420D
CTTAGCTTTCTGTTGGTTGTTGG	BnaA08g28420D
TCTAGAATTAGCAACATGGATGG	BnaA09g50090D
GAATCTCGACGTCGCATTTAGGG	BnaA09g50090D
CATATGCGAAACAGAAAGCTCGG	BnaA09g50090D
GGATCTCCTTAGCTTTCTGTTGG	BnaA10g03990D
TCTTCCTGCAGCTCAAGTTCCGG	BnaA10g03990D
AGGATAGAGCTCTGCTTTGCAGG	BnaC08g01640D
ACCAGAGGTTCTTAGCCACTGGG	BnaC08g01640D
TGCTACTACTCCTCTTCCGTGGG	BnaC08g44590D
TTCTGTTTCGCATATGGGTCAGG	BnaC08g44590D
TCCCAGTAGCTAAAAGCCTCTGG	BnaC08g44590D
>>AT1G06090	BnaA08g28450D	BnaA09g50060D	BnaA09g50070D	BnaA09g50080D	BnaA10g04040D	BnaC05g04140D	BnaC08g01670D	BnaC08g44610D	BnaC08g44620D
ATGCTCGTGAGCCCCAGATATGG	X	2	X	X	X	X	X	X	9	0.2222
GACCACCCCACAAGTAGACGAGG	X	2	X	X	X	X	X	X	9	0.2222
ACCACCCCACAAGTAGACGAGGG	X	2	X	X	X	X	X	X	9	0.2222
CAACAACCACCATGCCTTTGAGG	BnaA08g28450D
GTGCCTAGCCGAGGCCTCAAAGG	BnaA08g28450D
CCGAGGCCTCAAAGGCATGGTGG	BnaA08g28450D
GAGCCTGGAATAATGAAATGAGG	BnaA09g50060D
GGAGGAGCGATCGGTTACAACGG	BnaA09g50060D
CGTGCACTTCTTGTGTCTATTGG	BnaA09g50070D
ACAACCAAGGAGGATGTCTCTGG	BnaA09g50070D
GGCTATAGCCGAAAAGTTGTGGG	BnaA09g50070D
CGCCGCAAGTTAGGTAAGGTAGG	BnaA09g50080D
ACCACCAAAGAAGATGGCTCTGG	BnaA09g50080D
GGAGGAACAATCACTTATCATGG	BnaA09g50080D
GAGCCTGAAAGAACCGAATAAGG	BnaA10g04040D
AACAGTTGGTCTCCACGTCATGG	BnaA10g04040D
TGGCTAGCACCAGTGACGATGGG	BnaA10g04040D
ATGGGTGGCACCAAGGAGGATGG	BnaC05g04140D
CAACAACCACCATGCCTTTGAGG	BnaC08g01670D
CAATCGGTTACCACGGGACGTGG	BnaC08g01670D
GGAGGAGCAATCGGTTACCACGG	BnaC08g01670D
ACCACCAAAGAAGATGGCTCTGG	BnaC08g44610D
ATGCTCGTGAGCCCCAGATATGG	BnaC08g44620D
ATATCTGGGGCTCACGAGCATGG	BnaC08g44620D
GTACCTCATTTCGTTCTTCCAGG	BnaC08g44620D
>>AT1G06150	BnaA10g04080D	BnaC05g04200D	BnaC08g44650D
GAATAGTACCCACTATTCCTCGG	1	2	3	1
GTTGACATAGTCACTTCATCAGG	X	2	3	0.6667
ACGTGGAACTGTTTGATTGATGG	X	2	3	0.6667
GTATAGAAAAGATATGTCCTGGG	BnaA10g04080D
TATAGAAAAGATATGTCCTGGGG	BnaA10g04080D
GGTATAGAAAAGATATGTCCTGG	BnaA10g04080D
TTTCCTGCGCTAATCCCATCTGG	BnaC05g04200D
CTACATTCTTCTCCTGCATTTGG	BnaC05g04200D
ACGATAAGCAGAAACCATCGTGG	BnaC05g04200D
TAGAGTTCGAGAGATCGAATCGG	BnaC08g44650D
AGAGTTCGAGAGATCGAATCGGG	BnaC08g44650D
TTCCTGCATCTGGGTCATGGAGG	BnaC08g44650D
>>AT1G06170	BnaA10g04110D	BnaC05g04240D
TTCCATAACTCTATCTGCTATGG	1	2	1
AGTTCTTCAAGTCACCAAACCGG	1	2	1
ACTGTTCACTCCATTGAACTCGG	1	2	1
ACTCCTAGTAGAGTCCCACTAGG	BnaA10g04110D
CCTAGTAGAGTCCCACTAGGAGG	BnaA10g04110D
ATGATCATGTCGTGAAGGGTAGG	BnaA10g04110D
TCGGTTAAGACCATTCTCGGTGG	BnaC05g04240D
CCTAGTAGAGTCCCACTAGGAGG	BnaC05g04240D
>>AT1G06220	BnaA03g60340D	BnaA06g39950D	BnaA08g28490D	BnaA08g28500D	BnaAnng36610D	BnaC08g44690D	BnaCnng69360D
CAACAATAGGAAGATGGTCCTGG	X	2	X	4	X	X	X	0.2857
TCAGAGAAATTCACATGACCCGG	X	2	X	4	X	X	X	0.2857
CAGAGAAATTCACATGACCCGGG	X	2	X	4	X	X	X	0.2857
ATTTAGACCTGCTGTCCTCAAGG	BnaA06g39950D
GAAACGTTCCTCACAAGCGCTGG	BnaA06g39950D
AAGACCAACGAGAAACTGCGTGG	BnaA06g39950D
TATCCTCGGGGAGAACAATCTGG	BnaA08g28490D
CAACCAGATTGTTCTCCCCGAGG	BnaA08g28490D
AAAGTACTATCCCACCGCAGAGG	BnaA08g28490D
TGGATGGGGGCTGGCTCAAGTGG	BnaA08g28500D
GGATGGGGGCTGGCTCAAGTGGG	BnaA08g28500D
TCGTCGAAGCAGCAGATATGTGG	BnaA08g28500D
GGATGGGGGCTGGCTCAAGTGGG	BnaAnng36610D
CTGGCTCAAGTGGGCGCAATAGG	BnaAnng36610D
CCAGCTGCAGGGTCTATAAGGGG	BnaC08g44690D
AGCTTGTAATAAGCATCCCTTGG	BnaC08g44690D
TTGTAATAAGCATCCCTTGGAGG	BnaC08g44690D
GGATGGGGGCTGGCTCAAGTGGG	BnaCnng69360D
>>AT1G06260	BnaA08g28550D	BnaA10g28030D	BnaC05g04310D	BnaC08g01740D
GTCGCAGCCGGTACCATCTGTGG	X	2	3	X	0.5
GTACCATCTGTGGCTGTGTATGG	X	2	3	X	0.5
TACCATCTGTGGCTGTGTATGGG	X	2	3	X	0.5
GAACATTGCCTGATGCTGATGGG	BnaA10g28030D
ATGCTGATGGGTCACAACTATGG	BnaA10g28030D
CTTCTAGGCTCGCCTCGTTCGGG	BnaA10g28030D
GTATGGGTAGTCGTCCAGGGCGG	BnaC05g04310D
CGTCCGGAACATTGTCTGCTGGG	BnaC05g04310D
TGTCTGCTGGGTCACAACTATGG	BnaC05g04310D
GCTCAACAGCCAGTATCAGTAGG	BnaC08g01740D
>>AT1G06290	BnaA10g28060D	BnaC05g04350D
CTAAACTGAAGACCAAGCGTTGG	1	2	1
GTAGAAGATGAGAGCTGAGTTGG	1	2	1
GAGAGCTGAGTTGGCAATACAGG	1	2	1
CACTTGATGCAATTGTGACTCGG	BnaA10g28060D
CTCGCGCGCGAGGGAGAGGGAGG	BnaA10g28060D
TCGAGAAGGGAGTTTACAGAGGG	BnaA10g28060D
GATGTGGTTGGCGAGGATATTGG	BnaC05g04350D
GGTTTCTAAGCTCTGCGGAGAGG	BnaC05g04350D
CTATGAAGGCGTGAACTCCCTGG	BnaC05g04350D
>>AT1G06310	BnaA10g28070D	BnaA10g28090D	BnaC05g04370D
CAATAATGTTCTGATGCAGCAGG	1	2	3	1
AATCGAGTTGGTCATTTAAAAGG	1	2	3	1
TGAATCTCTTTGTTGGTCTCAGG	1	X	3	0.6667
TAGAAGATCTCGCTCTCTTATGG	BnaA10g28070D
ACTGAAGACCAAGCTAGCGTTGG	BnaA10g28070D
TGAGTTGAGTAGGCAACACAGGG	BnaA10g28070D
TTAGTCCCATTGAGATAACATGG	BnaA10g28090D
GTACTTCTGAGCAGATTCACAGG	BnaA10g28090D
GCCTTCTCTATTGTAGCCAATGG	BnaA10g28090D
TATTCCGAATGAAGTGACAAGGG	BnaC05g04370D
AACACCGAGTTTGGCGGATAGGG	BnaC05g04370D
CAGGAAGATAAGAGGAGGCAAGG	BnaC05g04370D
>>AT1G06350	BnaC08g46400D	BnaCnng77950D
ACATGGCTGACATAACCCTTCGG	BnaC08g46400D
GGCTGACATAACCCTTCGGTAGG	BnaC08g46400D
GCTGACATAACCCTTCGGTAGGG	BnaC08g46400D
TTTGAATCATCGGCGAGGCAAGG	BnaCnng77950D
TGGATTGGGTGAGCATACATAGG	BnaCnng77950D
ACCGTTCTCTATCTCTACGGTGG	BnaCnng77950D
>>AT1G06360	BnaA08g28580D	BnaA08g28600D	BnaA10g28080D	BnaA10g28100D	BnaC05g04360D	BnaC05g04380D	BnaC08g01770D	BnaC08g01790D
CGGTCCAATACATTAAGACTTGG	X	X	3	X	5	X	X	X	0.25
TGTCAAATATCCACATGATATGG	X	X	3	X	5	X	X	X	0.25
CTGAACAAAAGTCCTTCCTTAGG	X	X	3	X	5	X	X	X	0.25
TCGCTGATGTTTCAAACGCATGG	BnaA08g28580D
ATGCGTTTGAAACATCAGCGAGG	BnaA08g28580D
CAGCGAGGCATGGCTTTGAGTGG	BnaA08g28580D
CGAAGGCAATTTCACATCTGTGG	BnaA08g28600D
CACGGTCCGAATCTGTGAACTGG	BnaA08g28600D
CACAGATGTGAAATTGCCTTCGG	BnaA08g28600D
CAGCCGACGTCCAATATCTCTGG	BnaA10g28080D
GACCATATTTCCAGAGATATTGG	BnaA10g28080D
GGTCCGAATCACTGAACTGGTGG	BnaA10g28080D
CCACCACGCGTTTGAATCATCGG	BnaA10g28100D
ATCATCGGCGAGGCAAGGATTGG	BnaA10g28100D
ATGGGCTGATGTAGCAAGAGCGG	BnaA10g28100D
TACCATAGGAACTTGTCTCATGG	BnaC05g04360D
TCACCACGCGTTTGAGTGGTCGG	BnaC05g04360D
ACCATAGGAACTTGTCTCATGGG	BnaC05g04360D
AGCAAGAGCGGTAACCGTCACGG	BnaC05g04380D
CAAAAAGTGCACCACCGTGACGG	BnaC05g04380D
AAATAGTCGAATGAGGTACCAGG	BnaC05g04380D
CTAGAGCCATCGTCTCTAGTGGG	BnaC08g01770D
GCTAGAGCCATCGTCTCTAGTGG	BnaC08g01770D
GGAGCTTTAAGCTCCCAAAATGG	BnaC08g01790D
CCATCACCAGTTCACAGATTCGG	BnaC08g01790D
>>AT1G06515	BnaA04g06050D	BnaA10g04240D	BnaC04g28690D
>>AT1G06520	BnaA10g04260D	BnaC05g04490D
GGACTGAATCTCAGCAGATAAGG	1	2	1
CTTTCTTCCTGTCTCTCTTGAGG	1	2	1
CCTGTCTCTCTTGAGGCTAACGG	1	2	1
CCAGCACAAGTCATCTCTTTAGG	BnaA10g04260D
TTGAGGCTAACGGTCTTGAGAGG	BnaA10g04260D
AGCCACCGGAACAATGTCCTCGG	BnaC05g04490D
TTGAGGCTAACGGTCTTGAGAGG	BnaC05g04490D
>>AT1G06990	BnaAnng15740D	BnaC08g45090D
CAATATTGTTCCGTAGATATCGG	1	2	1
GATGACACTACCAGTGAGATTGG	1	2	1
CTAGCAAACGTCATCTGTACCGG	1	2	1
AGTGAGATTGGATTGAATATCGG	BnaAnng15740D
TCAACGCCGAGCTTGATACGAGG	BnaAnng15740D
GCAAACTCCGGTGAGAATGTCGG	BnaC08g45090D
GACAAATGCGGGTCGAGGAAAGG	BnaC08g45090D
>>AT1G07320	BnaA07g00970D	BnaA10g04770D	BnaC03g45400D	BnaC05g05110D	BnaC08g31780D	BnaC08g31790D	BnaCnng47210D
ATGGAGGAGATATGAGGGCACGG	1	X	X	X	X	X	7	0.2857
ACTTGCGGTGAAGTACGCGGCGG	1	X	X	X	X	X	7	0.2857
GGCGGCAGAATCAAGCCTCGTGG	1	X	X	X	X	X	7	0.2857
GATGGGGGTTGGATCCGAAGGGG	BnaA07g00970D
AGATGGGGGTTGGATCCGAAGGG	BnaA07g00970D
CCTCTCATGGAGGAGATATGAGG	BnaA07g00970D
AGCTGGGCTGCGACGGAGAGAGG	BnaA10g04770D
GCCGGAGCTGGGTTTCGCGACGG	BnaA10g04770D
ACGGCGTCGACGCTGACCCGCGG	BnaA10g04770D
GCAGGAATATAGGAATACTGAGG	BnaC03g45400D
TACTGAGGAAGTTGACGCAGAGG	BnaC03g45400D
AAGAGTAAGCACCCGCTTATTGG	BnaC03g45400D
CGGGACGCAGCGGCGTCCTCTGG	BnaC05g05110D
GGGACGCAGCGGCGTCCTCTGGG	BnaC05g05110D
GGACCCTCGCCGAGCGTTGCCGG	BnaC05g05110D
GAGATGGGGGTTGGATCCGAAGG	BnaC08g31780D
GATGGGGGTTGGATCCGAAGGGG	BnaCnng47210D
GAGATGGGGGTTGGATCCGAAGG	BnaCnng47210D
>>AT1G07420	BnaA09g49450D	BnaA09g49460D	BnaA10g04830D	BnaAnng26080D	BnaC05g05170D	BnaC08g02150D	BnaC08g45330D
GGTGAGTGCTGGACCGACTATGG	X	2	X	X	X	X	7	0.2857
CGACTATGGTAGCAAAACCCAGG	X	2	X	X	X	X	7	0.2857
TACTCTGATGTCAAACCAAATGG	X	2	X	X	X	X	7	0.2857
CAGTCTTCTGTAACCCTTATCGG	BnaA09g49450D
TTTCCAGATAAATGAAAGGGAGG	BnaA09g49460D
AAGAAGACGCTTTCGCGTGGAGG	BnaA09g49460D
TGGCCTCCCTTTCATTTATCTGG	BnaA09g49460D
TGGGATTTGCTACCATAGTCGGG	BnaA10g04830D
TCCCTTTCATTTATCTTGAAAGG	BnaA10g04830D
GGTGAGAGCTGGCCCGACTATGG	BnaA10g04830D
AAGTGCGGGCCGGTTAGAGCTGG	BnaAnng26080D
GAAATGATAAAGCAACAGGCGGG	BnaAnng26080D
TGAGAAAGCCATGTCTTTCGAGG	BnaAnng26080D
TCCATAACCAGAGAGTAATTAGG	BnaC05g05170D
CAGAGACCGACCATCTTCGTCGG	BnaC05g05170D
CGGACGCGCTAGGATTCGAGAGG	BnaC05g05170D
CCTCATCAGCAACGGATCTCAGG	BnaC08g02150D
CCTGAGATCCGTTGCTGATGAGG	BnaC08g02150D
ATAACCAGAGAGTAATCAAGTGG	BnaC08g45330D
TAACCAGAGAGTAATCAAGTGGG	BnaC08g45330D
CAGACTTTGTGTAGAGCAGTCGG	BnaC08g45330D
>>AT1G07430	BnaA01g23280D	BnaA09g49440D	BnaA10g04840D	BnaC05g05180D	BnaC06g06590D
TGATCTGTGGATAGAGGAACTGG	X	X	3	4	X	0.4
CCTGCAGTTAGCGCTCATCACGG	X	X	3	4	X	0.4
TCTCCTACCGCACACCGATGCGG	X	X	3	4	X	0.4
ATAGGATTCAAGAAGCAGGAGGG	BnaA01g23280D
GATAGGATTCAAGAAGCAGGAGG	BnaA01g23280D
ATCTTCTGGACGAGTTGGATAGG	BnaA01g23280D
CGCTACAATAATCTTCTCCGGGG	BnaA09g49440D
ATCGCTACTATGCTTCGCTAAGG	BnaA09g49440D
CAACCTTCAGGTGAGCTCCGAGG	BnaA09g49440D
GCGGCGCCGTATCTAGGCCTCGG	BnaA10g04840D
GCCTAGATACGGCGCCGCATCGG	BnaA10g04840D
GAGTCTCTCTCCGCCTTCCACGG	BnaC05g05180D
GCGGCGCCGTATCTAGGCCTCGG	BnaC05g05180D
GGCGAAAATTCATCGGTTATTGG	BnaC06g06590D
CGGTGAGAGAGACTGATGCGAGG	BnaC06g06590D
>>AT1G07645	BnaA06g04170D	BnaA09g49270D	BnaC05g05340D	BnaCnng38880D
GTCGTCTTGACGAGTCCCACAGG	1	2	3	4	1
CGTAGACGACTGAACTTTACCGG	1	X	3	X	0.5
ACGACTGAACTTTACCGGTTAGG	1	X	3	X	0.5
ACGACTGAACTTTACCGGTTAGG	BnaA06g04170D
CTTACACGGTTGTGTACGTTAGG	BnaA06g04170D
ATGCTGGTGACGCGGTGTGAAGG	BnaA09g49270D
ATTTAACGTGGCTACCAATGCGG	BnaA09g49270D
TGTGGGACTCGTCAAGACGACGG	BnaA09g49270D
AACTTTACCGGTTAGGTCATCGG	BnaC05g05340D
ATTTAACGTGGCTACCAATGCGG	BnaCnng38880D
CGAAGTCTGCTTCTGTTACCCGG	BnaCnng38880D
>>AT1G07720	BnaA06g04280D	BnaAnng15510D	BnaAnng15520D	BnaCnng52900D	BnaCnng58900D
TTGGAAGAGTCTTGTCTAAGTGG	1	2	3	4	5	1
CGGTGTAGCGTCATCCTCGCCGG	1	2	3	4	5	1
CGGCGAGGATGACGCTACACCGG	1	2	3	4	5	1
AGATCAAAACTGCTACATCTTGG	BnaA06g04280D
AACTGCTTGTTCCGGTCCGGTGG	BnaA06g04280D
CGACGTCCTTGTAGTCAACGTGG	BnaAnng15510D
ACCATTTCTGCATTCACACGGGG	BnaAnng15510D
CCATTTCTGCATTCACACGGGGG	BnaAnng15510D
CGTCAGAAGGTTTGTGACATTGG	BnaAnng15520D
GCATCGCAACGTTGACTACAAGG	BnaAnng15520D
GTAACCTATTGCGTCGATAACGG	BnaAnng15520D
ACCATTTCTGCATTCACACGGGG	BnaCnng52900D
AGATCAAAACTGCTACATCTTGG	BnaCnng58900D
>>AT1G07747	BnaC02g37720D
TGGATATCTACAGACTACAGAGG	BnaC02g37720D
>>AT1G07890	BnaA06g04380D	BnaA09g49190D	BnaAnng15470D	BnaC05g05550D	BnaC08g02340D	BnaC08g43490D
GCTGATTTCCATCAGCTTGCTGG	1	2	3	4	5	6	1
TCACATCCCTTTGTAGCATCAGG	X	2	X	X	X	6	0.3333
CACATCCCTTTGTAGCATCAGGG	X	2	X	X	X	6	0.3333
GAACATTCGATTGCGCCTCGAGG	BnaA06g04380D
TTCGATTGCGCCTCGAGGACTGG	BnaA06g04380D
GGTACTCTTCGCTAACAGCTGGG	BnaA06g04380D
GAACATTTGATTGTGCGTCAAGG	BnaA09g49190D
TTTGATTGTGCGTCAAGGACTGG	BnaA09g49190D
TTGTAAACACCTGTCTCAAGTGG	BnaA09g49190D
TAGGGAACTGGACCCTGACAGGG	BnaAnng15470D
GGTAAACCTCATTGTTCCGAAGG	BnaAnng15470D
AGCAGCGTATTTCTCAACCAAGG	BnaAnng15470D
GATAAGAGGGTTTGAAGTCCAGG	BnaC05g05550D
GGTAGGGAACTGCTCCCTGATGG	BnaC05g05550D
GAACGGACCACCAGTCCTCGAGG	BnaC05g05550D
CAAGCTCATGAGGCCAACAGTGG	BnaC08g02340D
AGTGGTATCCAGATTGCTCTTGG	BnaC08g02340D
TTTGATTGTGCGTCAAGGACTGG	BnaC08g43490D
AATCAGCAAAGGAGATGGTAGGG	BnaC08g43490D
>>AT1G08030	BnaA06g04490D	BnaAnng15430D	BnaC04g36250D	BnaC05g05690D	BnaC07g40380D	BnaC08g02380D	BnaC08g02390D
TGGATTATGTCATGAGCAGTGGG	X	X	X	X	X	6	7	0.2857
CATGTACAAATAGAAAGAAAAGG	X	2	X	X	X	6	X	0.2857
GCGTACAAGAGTTCCTAGAGAGG	X	2	X	X	X	6	X	0.2857
GCACACAATGCCGAACCTCGTGG	BnaA06g04490D
CACACAATGCCGAACCTCGTGGG	BnaA06g04490D
ATCACCGAGGTTCTCTCCCTCGG	BnaA06g04490D
CAACCACTTGGGAAAGCACCTGG	BnaAnng15430D
AGTGCTCAGCACACGTGCAACGG	BnaAnng15430D
GCACACGTGCAACGGGATCACGG	BnaAnng15430D
TTTGTGGATGCTGCTTCTAAGGG	BnaC04g36250D
ATCAGTGAGATTACATAGCTAGG	BnaC04g36250D
GTTTGTGGATGCTGCTTCTAAGG	BnaC04g36250D
CGTTTACAAATAGATACAAGAGG	BnaC05g05690D
CACACAATGCCGAACCTCGTGGG	BnaC05g05690D
AAAAGTGCAAGTTGTTGGCCAGG	BnaC07g40380D
TAAACTATAATCATCATGCCTGG	BnaC07g40380D
ACAAGCTCCACTTCGATCCAAGG	BnaC07g40380D
AGTTGACACGTCTGGTTCCTTGG	BnaC08g02380D
GTTGACACGTCTGGTTCCTTGGG	BnaC08g02380D
AAGGCTGCAGTACTCATCTACGG	BnaC08g02380D
GTTGACACGTCTGGTTCCTTGGG	BnaC08g02390D
TTTGATGGAAATGCTACCGAGGG	BnaC08g02390D
>>AT1G08070	BnaA03g21670D	BnaA06g04540D	BnaC05g05750D	BnaCnng67340D
GACCACAGAGTCTATTTCGATGG	X	2	3	X	0.5
ATTTCGATGGAGCTGCAACCAGG	X	2	3	X	0.5
AACACACACCATCCCTGAAATGG	X	2	3	X	0.5
TCACTTGCGGGACGACAGTTTGG	BnaA03g21670D
CTTGCGGGACGACAGTTTGGTGG	BnaA03g21670D
ACAGTTTGGTGGAAGCACGCAGG	BnaA03g21670D
GAGCACCAAATCACTCCATCAGG	BnaA06g04540D
ACGTCCAAGGTCTAACAAACCGG	BnaA06g04540D
GAGCACCAAATCACTCCATCTGG	BnaC05g05750D
CCAACAAGGGTGATATCGTCTGG	BnaC05g05750D
GTGGTCCATGAGTTCATCATTGG	BnaCnng67340D
TGGTCCATGAGTTCATCATTGGG	BnaCnng67340D
GGTCCATGAGTTCATCATTGGGG	BnaCnng67340D
>>AT1G08160	BnaA06g04630D	BnaA09g49000D	BnaAnng33810D	BnaC05g05830D	BnaC08g02440D	BnaC08g43330D
TCTCCTTGTGAGCCACGGACTGG	1	2	3	4	5	6	1
GTGAGCCGTGGAGATTCGCATGG	1	X	X	4	X	X	0.3333
TCGCATGGAGTGATATCTCACGG	1	X	X	4	X	X	0.3333
GCCGTAACGTTGATCATTACCGG	BnaA06g04630D
GTTCTTAGGACGCTGCTTGAAGG	BnaA06g04630D
ATTGTCGCCCTTGTCCTCTTAGG	BnaA06g04630D
ACAGTATAGACGAGTGTCTTTGG	BnaA09g49000D
GTTGCGTTCGCCGAGTCTGTTGG	BnaA09g49000D
ACCTTTCAACGTACGTCTCCTGG	BnaA09g49000D
ACCGTGTAGACTAGTCGCTTTGG	BnaAnng33810D
ATATGGCGAGACCCACAAGGAGG	BnaAnng33810D
GGTTCAAGCCTCTAGCAGGAAGG	BnaAnng33810D
CGATGCGGCTTCGACGGTATAGG	BnaC05g05830D
ACGGTATAGGCGAGACGCTTTGG	BnaC05g05830D
TTAATATTGCGAGACCTACGAGG	BnaC05g05830D
ATATGGCGAGACCCACAAGGAGG	BnaC08g02440D
TTTGGATGCTGCTTGAAGGCAGG	BnaC08g02440D
GTTCTTAGGACGCTGCTTGAAGG	BnaC08g43330D
AGACGAGTGTCTTTGGCCTGAGG	BnaC08g43330D
>>AT1G08230	BnaA08g27070D	BnaC08g02490D
>>AT1G08260	BnaA06g04690D	BnaC05g05920D
GCGAAAAATTGTCCGCTCTGTGG	1	2	1
AATTGTCCGCTCTGTGGACTTGG	1	2	1
ATTGTCCGCTCTGTGGACTTGGG	1	2	1
AATTGTCCGCTCTGTGGACTTGG	BnaA06g04690D
GCGAAAAATTGTCCGCTCTGTGG	BnaC05g05920D
ATTGTCCGCTCTGTGGACTTGGG	BnaC05g05920D
>>AT1G08370	BnaA06g04810D	BnaA08g27050D	BnaA09g48930D	BnaAnng28130D	BnaC05g06060D	BnaC08g43210D	BnaCnng14330D	BnaCnng14350D	BnaCnng27110D
GATGGTGGTGGAGTTGGTGGTGG	X	X	3	4	X	X	X	X	X	0.2222
ATGGTGGTGGAGTTGGTGGTGGG	X	X	3	4	X	X	X	X	X	0.2222
ATGCTGGCGCTGATGGTGAGAGG	X	X	3	X	X	6	X	X	X	0.2222
TGGAGCATCGGAGTACCATATGG	BnaA06g04810D
TGTCGATGAATTCATTCTCCTGG	BnaA06g04810D
TGAATTCATTCTCCTGGACCAGG	BnaA06g04810D
GTGGAGGTGCAGCTGCCGCAGGG	BnaA08g27050D
TGCAGCTGCCGCAGGGGAAATGG	BnaA08g27050D
CCGTGGGGGGCTGAAGAAAGAGG	BnaA08g27050D
AAAGTTCTGAGGAGGCGCAGTGG	BnaA09g48930D
AAGTTCTGAGGAGGCGCAGTGGG	BnaA09g48930D
TGCGGTTGTGTCATCGTTCGTGG	BnaA09g48930D
GAGTGCCATGTAGGTCCTGCTGG	BnaAnng28130D
GCTGGTAAGTCGGATTATTAAGG	BnaAnng28130D
GTCGGATTATTAAGGTTCAGAGG	BnaAnng28130D
CTGATGAGTCGCATTAGTAGTGG	BnaC05g06060D
ATAGCCTACTCTGTAATAGTAGG	BnaC08g43210D
AGGTCACGTGAGCCACGTGTTGG	BnaC08g43210D
TTCTCAAAGTGAGACATAATAGG	BnaC08g43210D
TTGTCAAAAAGAGGCATTAGAGG	BnaCnng14330D
AAAAAGAGGCATTAGAGGAGAGG	BnaCnng14330D
GGCATTAGAGGAGAGGAGGATGG	BnaCnng14330D
AAAAAGAGGCATTAGAGGAGAGG	BnaCnng14350D
TTGTCAAAAAGAGGCATTAGAGG	BnaCnng27110D
GGCATTAGAGGAGAGGAGGATGG	BnaCnng27110D
>>AT1G08510	BnaA06g04900D	BnaA08g26890D	BnaA10g09300D	BnaAnng26510D	BnaC05g06160D	BnaC08g13600D	BnaC08g43130D
ATAATCATATCAGAACGCCTCGG	X	X	X	4	X	6	X	0.2857
GAGGCGTTCTGATATGATTATGG	X	X	X	4	X	6	X	0.2857
TGCGTCGTGATTGGCTTGTTCGG	X	X	X	X	5	6	X	0.2857
GCATACCGTTCTTTCCAGACTGG	BnaA06g04900D
CTTCTCAGCCGCCAAGAAGACGG	BnaA06g04900D
GACTCTCTTGCCGTTGATCTTGG	BnaA06g04900D
ACTTTCTGCTGTCCTCGGCAAGG	BnaA08g26890D
AGATGGGAGAGGGAAGAATGAGG	BnaA08g26890D
GGTTAAGAAGAACTTGATATGGG	BnaA08g26890D
ACCTTCATCCTCCCAGAGCTTGG	BnaA10g09300D
GCCAAGCTCTGGGAGGATGAAGG	BnaA10g09300D
AGGCTCCACCCAAGATCAACGGG	BnaA10g09300D
ACCTATTTCATAAGACCTAATGG	BnaAnng26510D
AAACGTCCTCGGTGCGTGTGCGG	BnaAnng26510D
AACGTCCTCGGTGCGTGTGCGGG	BnaAnng26510D
TGCTGTCCTCGGCAAGGACTGGG	BnaC05g06160D
GGGTCTGAGTTAACAAAGTAAGG	BnaC05g06160D
TAGGGAGGATCGTTCAGGATGGG	BnaC08g13600D
ACCTTCATCCTCCCAGAGCTTGG	BnaC08g43130D
AGGCTCCACCCAAGATCAACGGG	BnaC08g43130D
>>AT1G08520	BnaA06g04910D	BnaC05g06170D
GACTGGAGATGATGCAGCGACGG	1	2	1
AGCTGATAACGCATCTTTAGTGG	1	2	1
GCATCTGGGGCAATACCCTCTGG	1	2	1
AGCTGATAACGCATCTTTAGTGG	BnaA06g04910D
CTTTCTCTCTGCGCAATTTCTGG	BnaA06g04910D
CGCGGCTCTGCTCCGTTTGGTGG	BnaC05g06170D
GAGGCTTTGGTATGAAGTCGGGG	BnaC05g06170D
GCTTTGGTATGAAGTCGGGGCGG	BnaC05g06170D
>>AT1G08630	BnaA06g05000D	BnaA08g26840D	BnaA09g48800D	BnaC05g06260D	BnaC07g03750D	BnaC08g13650D	BnaC08g43060D	BnaCnng27100D
GCAGCTATTAGAGACCCTAAAGG	X	X	3	X	X	X	X	8	0.25
GCAGCTCTCTTCGTGCCATCTGG	X	2	X	X	X	X	X	8	0.25
CCAACGATTACAGATCCTATCGG	1	X	X	4	X	X	X	X	0.25
GCGGAGTACACTGATAGAGTTGG	BnaA06g05000D
CTCTTGGAGTGCGACCAAAGCGG	BnaA06g05000D
AACGGAGGGATATCGACAATAGG	BnaA06g05000D
CATTCTCGTAAACATGGATGTGG	BnaA08g26840D
GGCTAAGATGATGGGTAAAGAGG	BnaA08g26840D
GGTCAAATTGTAACTTTGGGAGG	BnaA09g48800D
CGCATCGGTAGGTCTAGTCACGG	BnaA09g48800D
TGATGCGAACTGTGGATCTACGG	BnaA09g48800D
AGTGAACCATAACGCATATCAGG	BnaC05g06260D
CATGCTCCGTTAGACTCTTGCGG	BnaC05g06260D
GAGTGCATCCCAAGACAATCAGG	BnaC05g06260D
CATTCTCGTAAACATGGATGTGG	BnaC07g03750D
TATTAGATTCCCCATTGTGCCGG	BnaC07g03750D
CTCTTGGAGTGCGACCAAAGCGG	BnaC08g13650D
CACTTGGAGTTCCAGTCCATAGG	BnaC08g13650D
GGAGCGGTACTGATGCAGCGTGG	BnaC08g13650D
CAGCAGCCTGTACAAGCCTATGG	BnaC08g43060D
GCCTGTACAAGCCTATGGACTGG	BnaC08g43060D
CACTTGGAGTTCCAGTCCATAGG	BnaCnng27100D
ATGGTTCACTGCGAAGTGAGAGG	BnaCnng27100D
>>AT1G08640	BnaA06g05010D	BnaAnng23820D	BnaC05g06270D	BnaCnng14440D	BnaCnng27080D	BnaCnng65710D
TGGAGTTGAAGGGCCTTCAAAGG	1	X	3	X	X	X	0.3333
AATTCTGTAAACGAACACAAAGG	1	X	3	X	X	X	0.3333
ACAAAGGACATGAACTGCAGCGG	1	X	3	X	X	X	0.3333
ATCTTGTCGAAGCCCTCTATAGG	BnaA06g05010D
TCTTGGTGTTAACCCTATAGAGG	BnaA06g05010D
GTTAATCAACATATCATTTCTGG	BnaAnng23820D
GTGAAGAGAGATGTGGGCGTAGG	BnaAnng23820D
CTCGATCACATTTAAGATCCCGG	BnaAnng23820D
TGATCAACATATCGTTCTTGGGG	BnaC05g06270D
GATCAACATATCGTTCTTGGGGG	BnaC05g06270D
ATAAGCAGCCTATAATACCATGG	BnaCnng14440D
AAGCAGCCTATAATACCATGGGG	BnaCnng14440D
TAAGCAGCCTATAATACCATGGG	BnaCnng14440D
CACATTTAAGATCCCGGTATAGG	BnaCnng27080D
CTTAAATGTGATCGAGTACATGG	BnaCnng27080D
CATATCATTTCTGGAAGACTTGG	BnaCnng65710D
TGGACTTCCTTTCTTAAACCTGG	BnaCnng65710D
>>AT1G08660	BnaA06g05030D	BnaA09g48780D	BnaC05g06300D	BnaC08g43040D
TGACAGGAGCTTCATTATCTCGG	1	2	3	4	1
GTAAGGCGGAGGCGTGAGCTCGG	X	2	X	4	0.5
TAAGGCGGAGGCGTGAGCTCGGG	X	2	X	4	0.5
GACAAGATCTTAATATCTTCCGG	BnaA06g05030D
CGGGTTATCATTTCACGACTTGG	BnaA09g48780D
TTCCTTTCTCTCGGACCTCATGG	BnaA09g48780D
GTGCATTTATGAAACTGCCGTGG	BnaC05g06300D
TGCATTTATGAAACTGCCGTGGG	BnaC05g06300D
ATTTATGAAACTGCCGTGGGTGG	BnaC05g06300D
TTCCTTTCTCTCGGACCTCATGG	BnaC08g43040D
CCTTTCTCTCGGACCTCATGGGG	BnaC08g43040D
>>AT1G08730	BnaA06g05060D	BnaA08g26800D	BnaC05g06330D	BnaCnng47820D	BnaUnng05330D
CTTCTCTTGATAACTTCCTCGGG	X	2	X	X	5	0.4
TATATGATACATGCTGTGATAGG	1	2	X	X	X	0.4
AAAGATATACCCAAAGGATGTGG	X	2	X	4	X	0.4
CTTTGTCATGTCATCAACACCGG	BnaA06g05060D
GAAGTAGAGTCGGTGTGGGTGGG	BnaA06g05060D
ACCTTACACACCAAGAACGAAGG	BnaA06g05060D
AAAGTGCACCAACTTGGAATCGG	BnaA08g26800D
AATCGGAGAATAAAGTCTTACGG	BnaA08g26800D
GTTTCATCTTAAGACAGCAGCGG	BnaA08g26800D
CCTTCTTTCCGGTTGTGGCTTGG	BnaC05g06330D
TCCTCTTGGCACTACTTTCTTGG	BnaC05g06330D
CACGTACCATTGTTCAATATTGG	BnaCnng47820D
AAAGATATACGGAATGATTCGGG	BnaCnng47820D
TTCCATCTGCAGAAGCCTGGTGG	BnaUnng05330D
TCTTGCGACAAGGAGAGCTATGG	BnaUnng05330D
>>AT1G08750	BnaA06g05070D	BnaC05g06340D	BnaC08g43000D
GTAAAGATCAGTTCGGTAGTAGG	1	2	3	1
GCAGTAGACATTAGCTGTCTCGG	1	2	3	1
CAGTCATGTAGAGTAGAATATGG	1	2	3	1
ATCGGATTTGATCTTGCTATTGG	BnaA06g05070D
AGATTCTACTCGAGAAGGCATGG	BnaA06g05070D
TCCTTTAAGACTGCTACCAATGG	BnaA06g05070D
TGGCTGATTAAATGGCGTATCGG	BnaC05g06340D
AGATTCTACTCGAGAAGGCATGG	BnaC05g06340D
TTACCAGCCAAAACTGACTGAGG	BnaC08g43000D
ATTAGGATGATGCGTTCATCTGG	BnaC08g43000D
CTACTCTACATGACTGGCCATGG	BnaC08g43000D
>>AT1G08810	BnaA06g05130D	BnaA08g26750D	BnaC05g06400D	BnaC05g06410D	BnaCnng06440D
GGAACAGATCTCCAGTTTCCAGG	X	2	X	X	5	0.4
AGTTTCCAGGACCATGTTCTTGG	X	2	X	X	5	0.4
CTGAGACCTGGAATCAAACGTGG	X	2	X	X	5	0.4
GAAAAGATAGGGATCAAGAAAGG	BnaA06g05130D
CATTTCTCAATAAATGTCAATGG	BnaA08g26750D
CATTGACATTTATTGAGAAATGG	BnaA08g26750D
AATTAGCCGTGCTACTCTTAGGG	BnaC05g06400D
ATTAGCCGTGCTACTCTTAGGGG	BnaC05g06400D
CTGACTCCTTTGGATGAACAAGG	BnaC05g06400D
TTGTGGTAGATACGAAGCTATGG	BnaC05g06410D
ATTCACTTGCAAGCCTTATTGGG	BnaC05g06410D
CCTTCATGTTGTGAAAAGATAGG	BnaC05g06410D
CATTGACATTTATTGAGAAATGG	BnaCnng06440D
>>AT1G08840	BnaA09g48710D	BnaC01g08290D	BnaC08g42960D
CTAGTGGCGGTAGTTGATAGTGG	1	2	3	1
AATGTAGAGGCAAACAGCAAAGG	1	2	3	1
TACAGGGAGGGCAATTTGGCCGG	1	2	3	1
TTTATGTTGCCCAGTGCCCGTGG	BnaA09g48710D
GCACTGCATGTTACAGTACAAGG	BnaA09g48710D
ATAAATACAACTGTTCTGGTTGG	BnaA09g48710D
GAAAAATCCACCTGCACTAGTGG	BnaC01g08290D
AAATCCACCTGCACTAGTGGCGG	BnaC01g08290D
CAACACAAGTACAAATGTAGAGG	BnaC01g08290D
ATGAAAGTGACGGTGGGGTCTGG	BnaC08g42960D
AGTGACGGTGGGGTCTGGAAAGG	BnaC08g42960D
>>AT1G08970	BnaA06g05230D	BnaA08g26690D	BnaA09g48620D	BnaC05g06520D	BnaC08g42880D	BnaCnng06510D
GCAGGCCCTTGCAAACACAACGG	1	X	X	4	X	X	0.3333
CAGGCCCTTGCAAACACAACGGG	1	X	X	4	X	X	0.3333
TGCAAACACAACGGGAGCCTCGG	1	X	X	4	X	X	0.3333
GCTAAGGTCGTGGAACCACACGG	BnaA06g05230D
TCCGAGAGGGACTGTCCCTGAGG	BnaA08g26690D
GCCTCAGGGACAGTCCCTCTCGG	BnaA08g26690D
ACATGGGTTGACCCATATACGGG	BnaA08g26690D
CCTATAGGAGCAGTTCCAGCAGG	BnaA09g48620D
TTCTCCTGGTCAGGCTGATCAGG	BnaA09g48620D
AAAGATATCAGTTCTCGTCACGG	BnaA09g48620D
TTCCCTATAGGTCCAGTTCCCGG	BnaC05g06520D
CCTATAGGTCCAGTTCCCGGAGG	BnaC05g06520D
ACTGGTTCTCCCAGAAGACTTGG	BnaC08g42880D
TGAGCCGTAGTTCATGGCTCCGG	BnaC08g42880D
GCAGAAGAACGATATCGCGGCGG	BnaC08g42880D
TCCGAGAGGGACTGTCCCTGAGG	BnaCnng06510D
GACCCATATACGGGTTAGGTGGG	BnaCnng06510D
>>AT1G09090	BnaA09g48550D	BnaC08g42780D	BnaC08g42790D	BnaCnng48040D
ACATAGCACCTGACTTACACCGG	1	X	3	X	0.5
GCTTCCCCGAAACAACCGACCGG	1	X	3	X	0.5
ACCGACCGGAGAACTGCCATCGG	1	X	3	X	0.5
GTGGCTTGTGCCTTCTTCAATGG	BnaA09g48550D
TGCCTTCTTCAATGGATTTGTGG	BnaA09g48550D
CTTAAGTATACTGATTAATGGGG	BnaA09g48550D
CTTAAGTATACTGATTAATGGGG	BnaC08g42780D
ATGGGGTCGCTCCGATACCTAGG	BnaC08g42780D
ACCGACCGGAGAACTGCCATCGG	BnaC08g42790D
TTTCCAGCTTCAGTGAGCCGAGG	BnaC08g42790D
TGCCTTCTTCAATGGATTTGTGG	BnaCnng48040D
CGGGTCTTGCGAAATGGGTCCGG	BnaCnng48040D
>>AT1G09390	BnaA06g37930D	BnaC05g06980D
ATGTTCACGTTGTAGTTATAAGG	1	2	1
TTCACGTTGTAGTTATAAGGAGG	1	2	1
TATCCGCAACACGCCATTAACGG	1	2	1
CAATCATGTACAATGCGTTTCGG	BnaA06g37930D
TCACCAGCAGGAGACTAAGGAGG	BnaA06g37930D
CTTCCTCCTTAGTCTCCTGCTGG	BnaA06g37930D
AATATCGATCATGTACAATGCGG	BnaC05g06980D
GAATGAAGATCGCCAGCAGGAGG	BnaC05g06980D
AAGGTGTGGGAGTGGAGAGAGGG	BnaC05g06980D
>>AT1G09530	BnaA06g37850D	BnaA09g48450D	BnaC05g07080D	BnaC08g42700D
AGCCTGAAAAGCTCAAACAGAGG	1	2	3	4	1
ACTCATACCAAACTGCAACAAGG	1	2	3	4	1
ATGGGAATGCCTTATGCAATGGG	1	2	3	4	1
ATCCATCAAGGGATTGATGAGGG	BnaA06g37850D
CAATGGGAATGAATCAGCTCCGG	BnaA06g37850D
CAAGGTTCTCAACGAGCCTAAGG	BnaA06g37850D
GTGGCCCGTGGTTAACCGAGGGG	BnaA09g48450D
GGTTAACCGAGGGGCCACCACGG	BnaA09g48450D
CCATTGCTGCAGCAGCAGCCGGG	BnaA09g48450D
GGACTCTTCTCTTTAGAGCCAGG	BnaC05g07080D
CTCGTCCACCATCGTGGCCTTGG	BnaC05g07080D
TCGTCCACCATCGTGGCCTTGGG	BnaC05g07080D
GGGTAATGGCCCATACCCGGTGG	BnaC08g42700D
GGTAATGGCCCATACCCGGTGGG	BnaC08g42700D
GCTTGTTTGGGAGAACGGTCAGG	BnaC08g42700D
>>AT1G09540	BnaA06g05440D	BnaA08g26320D	BnaA09g48440D	BnaC08g42690D	BnaCnng06970D	BnaCnng19930D
TCGTTCTGGCTTTGGCTCCAAGG	1	2	3	4	5	6	1
ACGAAGACCGGTAGAGAGATCGG	X	X	3	4	X	X	0.3333
TTTGTCTGAAACTCCCAGTTAGG	X	X	3	4	X	X	0.3333
GAGATGGGTTTGTGTGTGTTTGG	BnaA06g05440D
ACAACGAGATCAAGAATCTATGG	BnaA06g05440D
CCAGCAGCCATGGCCATGATGGG	BnaA08g26320D
AAGTAGTCGGAGAAATCAGATGG	BnaA08g26320D
TCAGTACTCGAACTGTTGTCCGG	BnaA09g48440D
GTACTCGAACTGTTGTCCGGAGG	BnaA09g48440D
TCAGTACTCGAACTGTTGTCCGG	BnaC08g42690D
CCAGCAGCCATGGCCATGATGGG	BnaCnng06970D
TAGATTCTTGATCTCGTTGTCGG	BnaCnng06970D
AAGTAGTCGGAGAAATCAGATGG	BnaCnng19930D
GAGATGGGTTTGTGTGTGTTTGG	BnaCnng19930D
>>AT1G09700	BnaA06g05600D	BnaA08g26200D	BnaC05g07140D	BnaC08g13800D
TCTGAGCATATTCCTGCAACCGG	1	2	3	4	1
TTGATGATGGTTTCTTTCACCGG	1	X	3	X	0.5
TCCACAGTACATGTGAACTGTGG	1	X	3	X	0.5
TCCCGAGAGTCTCGCTCCTTTGG	BnaA06g05600D
AACAGATTGGGTTAGGTCACTGG	BnaA06g05600D
ACGGTTGAAGAATCCAGGCAAGG	BnaA06g05600D
GCCTTACGGTTGAAGAATCCAGG	BnaA08g26200D
GAGAGCTGTAGTTGTTGGCAAGG	BnaC05g07140D
AACAGGTAGTGAAACAGATTGGG	BnaC05g07140D
GCCTTACGGTTGAAGAATCCAGG	BnaC08g13800D
>>AT1G09730	BnaA06g05630D	BnaA08g26190D	BnaC05g07170D	BnaC08g13810D	BnaCnng47570D
TGTCGAGATCAGCAAGTTTACGG	1	2	3	4	5	1
ACAAGGAAGGTGGACATGTTTGG	1	2	3	4	5	1
CAAGGAAGGTGGACATGTTTGGG	1	2	3	4	5	1
GCTTCACTTTCCTTCTGCACCGG	BnaA06g05630D
TAAATCCCTCAGAACCATACCGG	BnaA06g05630D
CACTATTAACTTCCCGTGAACGG	BnaA06g05630D
CTTGAAAGGACTAAAATTCTGGG	BnaA08g26190D
ATGTGTCTGAACTCTGGAGAGGG	BnaA08g26190D
ATGTGAAATACCCGGCTGTATGG	BnaA08g26190D
TCTTCATACAAACTTTCCATTGG	BnaC05g07170D
CATTTCCTCAGCTTCGTCTGTGG	BnaC05g07170D
TACAAACTTTCCATTGGGATTGG	BnaC05g07170D
GTGTCATTTACAAATGTCTCTGG	BnaC08g13810D
GAGCTCGCCGAGTCCGCTTCTGG	BnaC08g13810D
GTACAGTTAGCCACTTCACCAGG	BnaCnng47570D
>>AT1G09780	BnaA08g26140D	BnaC04g41780D	BnaC08g13860D
GACCACCCCAAGCTCCCCAAGGG	1	X	3	0.6667
TTCCCAAAGATCCGTTACGCTGG	1	X	3	0.6667
GACCACCCCAAGCTCCCCAAGGG	BnaA08g26140D
GACCACCCCAAGCTCCCCAAGGG	BnaC08g13860D
>>AT1G10010	BnaA06g38000D	BnaA06g38010D	BnaA09g57230D	BnaA09g57240D	BnaC05g07760D	BnaC05g49200D	BnaC05g49210D	BnaC08g42410D	BnaC08g42420D	BnaC08g42430D
CCAAGATCGCGTTAAAGAAGGGG	X	2	3	X	X	X	X	X	X	X	0.2
ATCATCGTCGAAGTTATTCCCGG	X	2	3	X	X	X	X	X	X	X	0.2
CCCAAGATCGCGTTAAAGAAGGG	X	2	3	X	X	X	X	X	X	X	0.2
TAAGGAAGTCTCCGGGGGCTCGG	BnaA06g38000D
TGACATAATGGCGGCGATAATGG	BnaA06g38000D
AAAAATTTCCACGACCCCGAAGG	BnaA06g38000D
AACTGTTAGCGGCCAGAATGCGG	BnaA06g38010D
TATGTTCATCGAATGTTCTTTGG	BnaA06g38010D
GCCGACGATGGATCCTATTGCGG	BnaA06g38010D
ATCGTCGAAGTTATTCCCGGCGG	BnaA09g57230D
GGGAATAACTTCGACGATGATGG	BnaA09g57230D
TAAGGAAGTCTCCGGGGGCTTGG	BnaA09g57240D
ACCTCTTATGTGGTTGCATTGGG	BnaC05g07760D
GCATCGAATTATCCATACATGGG	BnaC05g07760D
GGATCCCACTGCAGCTAAGGCGG	BnaC05g07760D
CGTGATCATCACAGCAGCACCGG	BnaC05g49200D
ATCGTCGACGTTGGCGTCAGCGG	BnaC05g49200D
TTGTAGTTGAGACTCCGGCAAGG	BnaC05g49210D
TCCGATAGACGCATAAGAAAAGG	BnaC05g49210D
TAAGGAAGTCTCCGGGGGCTTGG	BnaC08g42410D
AAAGTCAGTAAGGAAGTCTCCGG	BnaC08g42410D
GGAGACTTCCTTACTGACTTTGG	BnaC08g42410D
CACATAATCACGGCTGTGATAGG	BnaC08g42420D
AGGGTTGAAACTCCTTGTATTGG	BnaC08g42420D
ATCACGGCTGTGATAGGTTCCGG	BnaC08g42420D
ATGGTCGGGAGAAGAGAACGGGG	BnaC08g42430D
GCGAGATGTGCATCTCCACTGGG	BnaC08g42430D
>>AT1G10200	BnaA06g06000D	BnaA08g25900D	BnaC05g07550D	BnaC08g14110D
GACAACGGAAACAAGCTTTGTGG	1	X	3	X	0.5
AACAAGCTTTGTGGTAGACCCGG	1	X	3	X	0.5
GTGGTAGACCCGGTTATCAGCGG	1	X	3	X	0.5
CAGCGGTTAACTTGTCGACGAGG	BnaA06g06000D
TAACTTGTCGACGAGGTACACGG	BnaA06g06000D
AGGAGGAGATAATGCCGCTAAGG	BnaA08g25900D
TCTCCCTCCAAAGGCCTGTCTGG	BnaC05g07550D
CAGCGGTTAACTTGTCGACGAGG	BnaC05g07550D
TTCCGTTGTCACCATTGCAAAGG	BnaC08g14110D
TTCCTTTGCAATGGTGACAACGG	BnaC08g14110D
>>AT1G10470	BnaA06g06240D	BnaA08g25770D	BnaA09g48160D	BnaC03g48210D	BnaC05g07990D	BnaC08g14280D	BnaCnng49440D
TTCACGTCGGCGAGTTTCACCGG	1	2	3	4	5	6	7	1
TTCTCCGCCGTTATCTCCCGTGG	X	2	X	X	X	6	X	0.2857
ATGATCTCCACGGGAGATAACGG	X	X	X	X	5	X	7	0.2857
GTCAACGGCGGCGAATCTTCTGG	BnaA06g06240D
TTCTGCCGTCGAACCGGCGACGG	BnaA06g06240D
CCGACGACATTATTACAACCGGG	BnaA06g06240D
TCACGGCGGTTGATAGCGGATGG	BnaA08g25770D
CGTCGAACCGGCGAAGACTCCGG	BnaA09g48160D
CGGAGTCTTCGCCGGTTCGACGG	BnaA09g48160D
TTTCCAGGGGAGACAACGGCGGG	BnaA09g48160D
CGTCGAGCCGGCGATTCCTCCGG	BnaC03g48210D
TCCGGCGCCGACGAAGACTCCGG	BnaC03g48210D
TCCGGAGTCTTCGTCGGCGCCGG	BnaC03g48210D
AGAAGAGTCCGGCGAATCAGGGG	BnaC05g07990D
AGTCCGGCGAATCAGGGGAGAGG	BnaC05g07990D
TTCTCCGCCGTTATCTCCCGTGG	BnaC08g14280D
AACTTTCCAACGGAAACAAACGG	BnaC08g14280D
CGATGACAATCCGATCAACGAGG	BnaC08g14280D
AGTCCGGCGAATCAGGGGAGAGG	BnaCnng49440D
>>AT1G10510	BnaA06g06350D	BnaA08g25710D	BnaC08g14320D	BnaCnng28070D
>>AT1G10570	BnaA06g06380D	BnaA06g06410D	BnaCnng28100D
>>AT1G10745	BnaA02g13570D	BnaA02g13580D	BnaA09g54580D	BnaC02g17740D	BnaC03g73040D	BnaC05g18940D	BnaC05g18950D
CATCAAATTGTGTTCATGCTAGG	X	X	3	X	X	X	7	0.2857
CAACATTTGCGAACTCGTCCTGG	X	X	3	X	X	6	7	0.4286
GATGAATGTTAGAGGAATAGAGG	X	X	3	X	X	6	7	0.4286
TAAAGTCTTAATTGTATAGGAGG	BnaA02g13570D
TACAGCACCAACAATCTCTTTGG	BnaA02g13570D
CATAGAAGATGTTCAGATCAAGG	BnaA02g13570D
AGAGGATGAACATGAATATCAGG	BnaC05g18940D
CATCAAATTGTGTCCATGCTAGG	BnaC05g18940D
GATGCAAAGCAAAGAAAGAGAGG	BnaC05g18940D
ATTCTCTGAGCGAAGAGATTCGG	BnaC05g18950D
GCACATCAGAAGATTGTTTAAGG	BnaC05g18950D
CCATTAACCAAAAAAATGAAAGG	BnaC05g18950D
>>AT1G10747	BnaA06g25820D	BnaC03g47700D	BnaC03g47710D	BnaC03g64210D	BnaUnng00710D
AAGGGGAAAGCCGTGACAATTGG	X	X	X	4	5	0.4
CAATTGGATTTGAAACACTTTGG	X	X	X	4	5	0.4
GCAAAGAGAAGAGGCATAGCAGG	X	X	X	4	5	0.4
TTGGTGCTGCTTTAATGACGCGG	BnaC03g64210D
TTAATGACGCGGATATTTGTTGG	BnaC03g64210D
TTAATGACGCGGATATTTGTTGG	BnaUnng00710D
>>AT1G10770	BnaA06g06610D	BnaA09g47760D	BnaC05g08260D	BnaC08g14550D
TTCGTGACACGCTTCACCAAAGG	1	X	3	X	0.5
TGACACGCTTCACCAAAGGCTGG	1	X	3	X	0.5
ACCAAAGGCTGGCACAGAGATGG	1	X	3	X	0.5
ACCAAAGGCTGGCACAGAGATGG	BnaA06g06610D
GATACGCGGTGTGAGAGCATAGG	BnaA06g06610D
GTGCGTGGCGCGTCTTGGGTTGG	BnaA09g47760D
TTGGTGATACGTTTAATCATAGG	BnaA09g47760D
TGATACGTTTAATCATAGGTTGG	BnaA09g47760D
ACCAAAGGCTGGCACAGAGATGG	BnaC05g08260D
>>AT1G10910	BnaA06g06720D	BnaC05g08400D
CGTCTTTAAAGAGTTTCCCATGG	1	2	1
TTTACTATGCATGTCAAGCAAGG	1	2	1
TATGCATGTCAAGCAAGGTTTGG	1	2	1
CATTTCTCCTGCTCTGCAATAGG	BnaA06g06720D
CCTTGACACGATATGATGCTTGG	BnaA06g06720D
GAAGAATCACGTTCAAGTCTTGG	BnaA06g06720D
CTCTGACCTCTACTAAACTTCGG	BnaC05g08400D
GCAAGGTTTGGTACGCAAGTAGG	BnaC05g08400D
AGTGTTGTAGTCAGGACTAACGG	BnaC05g08400D
>>AT1G11000	BnaA09g47890D	BnaC08g42240D
ATCTCAATCTCATCGTTTAAAGG	1	2	1
AACCAGAAAAGTCCATCACGCGG	1	2	1
CGAGACAACGTGCTCAAGTTTGG	1	2	1
GGCGGCTCGATATCATAACGTGG	BnaA09g47890D
ATCAGCCGTAACAGAATCTCTGG	BnaA09g47890D
CGAGACAACGTGCTCAAGTTTGG	BnaC08g42240D
CTTCAGCCATTACGATCGCTTGG	BnaC08g42240D
TTCAGCCATTACGATCGCTTGGG	BnaC08g42240D
>>AT1G11060	BnaA06g06790D	BnaA09g47920D	BnaC05g08450D	BnaC08g42210D
ATCACTGCTTTATGTGTCTCCGG	1	2	3	4	1
ACTGCTTTATGTGTCTCCGGAGG	1	2	3	4	1
CTGCTTTATGTGTCTCCGGAGGG	1	2	3	4	1
AGGGTTCTTTGCGGCATACCCGG	BnaA06g06790D
TTTGCGGCATACCCGGCTTGCGG	BnaA06g06790D
GCGGCATACCCGGCTTGCGGCGG	BnaA06g06790D
AGTTGGATGGGGTTCTCGGCGGG	BnaA09g47920D
GGGGTTCTCGGCGGGATCTCCGG	BnaA09g47920D
TCGGCGGGATCTCCGGCTTGCGG	BnaA09g47920D
AATCTTGGCTGGAGAAAGGGAGG	BnaC05g08450D
ACGGTGTCGTTTAGAGAGTCGGG	BnaC05g08450D
AATCTGCCTGCAAACGAAGCAGG	BnaC08g42210D
ATCTGCCTGCAAACGAAGCAGGG	BnaC08g42210D
GAGTCTTGTCGTTGACGTAGTGG	BnaC08g42210D
>>AT1G11130	BnaA06g06870D	BnaA09g47730D	BnaA09g47990D	BnaC05g08510D	BnaC08g42180D
CTCTCTAGCAACCGCTTCACTGG	1	2	3	4	5	1
TCTCTAGCAACCGCTTCACTGGG	1	2	3	4	5	1
GCTAGTGTCTGATGTCCCCTCGG	1	X	X	4	X	0.4
GGAGGAGCATGGTGAGTAGCGGG	BnaA06g06870D
GGGTTATGCGGCTCCTGAGGTGG	BnaA06g06870D
ACGCCCCTCCAGTACGTTAGAGG	BnaA09g47730D
CTTCAGCCCTTGGTGGCGTAGGG	BnaA09g47730D
GTAGCCGTATAATCTGTCTCCGG	BnaA09g47730D
GAGAGTCGCTAACTCTCCCATGG	BnaA09g47990D
AGTCGCTAACTCTCCCATGGAGG	BnaA09g47990D
GTCGCTAACTCTCCCATGGAGGG	BnaA09g47990D
CTCCCATTGAGGGAGGTAAACGG	BnaC05g08510D
TCGAAGATTGGTGACTCCAGCGG	BnaC05g08510D
GCGGTTGGCATACCTCATGAAGG	BnaC05g08510D
CTTCAGCCCTTGGTGGCGTAGGG	BnaC08g42180D
>>AT1G11310	BnaA06g06970D	BnaA08g25340D	BnaA09g47670D	BnaC05g08620D	BnaC08g14780D	BnaC08g14820D	BnaC08g49800D
TGAGTGACAAGGGCATAGAGTGG	X	2	X	X	X	X	7	0.2857
TTGGATTCTTAGACCCAATTTGG	X	2	3	X	X	X	X	0.2857
GGTCTAAGAATCCAAGAGAAAGG	X	2	3	X	X	X	X	0.2857
CTTCATCAGCGGCGCTGCAAGGG	BnaA06g06970D
CCCGCTAAACAAGAAGACGATGG	BnaA06g06970D
CTTTAGAGCAGACCTCTACGTGG	BnaA06g06970D
CTCGGAAAAGAAACCTGTTCTGG	BnaA09g47670D
AGTTCCACGGATGCCAGAACAGG	BnaA09g47670D
GAAACCTGTTCTGGCATCCGTGG	BnaA09g47670D
TCGAATGTCCTTTCACTCCCTGG	BnaC05g08620D
TGTAAGACTCAGCTACCTCAAGG	BnaC05g08620D
AGGGGAATTAGTAATGTGTCAGG	BnaC08g14780D
GAATCCGTGGACAACCCATGAGG	BnaC08g14780D
AATCCGTGGACAACCCATGAGGG	BnaC08g14780D
GGGTACTAAGATGAAGCCAACGG	BnaC08g49800D
CCATGAAAGCAATGCAGATGTGG	BnaC08g49800D
GTGAGGAAGGTCCAGCTTCTTGG	BnaC08g49800D
>>AT1G11400	BnaA06g07070D	BnaA08g25310D	BnaA09g35440D	BnaA09g46540D	BnaC05g08720D	BnaC08g14910D	BnaC08g28390D
TTCGTTCCTCTTAGCAGCTTTGG	X	X	3	X	X	6	X	0.2857
CTCTTAGCAGCTTTGGTCTTTGG	X	X	3	X	X	6	X	0.2857
TTTGGTTTAGGAGTTGGATCAGG	X	X	3	X	X	6	X	0.2857
CCATTGCTTGGAGTCACAACAGG	BnaA06g07070D
CCTGTTGTGACTCCAAGCAATGG	BnaA06g07070D
ACAGATTGGGAACCATTGCTTGG	BnaA06g07070D
CCGTTGCTTGAAGTGACAATGGG	BnaA08g25310D
AAGTGCACGTATTCTCTTCTCGG	BnaA08g25310D
GTGTCATCTCCTGCAGTTCCTGG	BnaA08g25310D
AAGTGCACGTATTCTCTTCTCGG	BnaA09g35440D
GGTACTCTCCGGAAACCCATTGG	BnaA09g46540D
ATGTCCAGCTCGAATCCCAATGG	BnaA09g46540D
GTTTGGTCCGGTTCATAGCCTGG	BnaA09g46540D
GCTCCGGCTTTAGGTCTTTGGGG	BnaC05g08720D
CTCCGGCTTTAGGTCTTTGGGGG	BnaC05g08720D
GAACATGTCCAGCTCGAATCCGG	BnaC08g14910D
GTGCCATCAGGTCTACGTGTAGG	BnaC08g14910D
GTAGACCTGATGGCACTCTCCGG	BnaC08g14910D
CTACTCTCTCCTCCCATCAAAGG	BnaC08g28390D
CGAAAAAGGAAGCCATTAGAAGG	BnaC08g28390D
CTGAGAAGAATCAGCAACGTTGG	BnaC08g28390D
>>AT1G11680	BnaA06g07270D	BnaA08g31650D	BnaAnng33870D	BnaAnng33880D	BnaC01g44720D	BnaC08g07160D	BnaCnng18080D	BnaCnng41000D	BnaCnng41010D	BnaCnng75820D
ATAGCGTTCCAGTCAATCTCAGG	X	2	X	X	X	X	X	8	X	X	0.2
TCTTGAAGATATGCGGCAAGCGG	X	2	X	X	X	X	X	8	X	X	0.2
GGCAAGCGGTTGGCAAACGCAGG	1	2	X	X	X	X	X	X	X	X	0.2
GAAGATATGCGGCAAGCGGTTGG	BnaA06g07270D
GCTTTGTCCTCTTCTCTTCCCGG	BnaA06g07270D
GAAGATATGCGGCAAGCGGTTGG	BnaA08g31650D
GATGTTGAAGTCACTGTGGGAGG	BnaA08g31650D
CAACGGAGGGTGAAGCCTCAAGG	BnaA08g31650D
GTGAACACACTTCCAAGCTTAGG	BnaAnng33870D
TGAACACACTTCCAAGCTTAGGG	BnaAnng33870D
TCATCTCTAAGCATTACGACAGG	BnaAnng33870D
TAGCGTTCCAGTCCATCTCAGGG	BnaAnng33880D
TACGTTGAAATCACTGTGCGAGG	BnaAnng33880D
CGACAGGGCCTTTCAAGAACCGG	BnaC01g44720D
GGGAGGATGACGCTTCTTCCTGG	BnaC01g44720D
GCTTTGTCCTCTTCTCTTCCAGG	BnaC08g07160D
TTCTCGAAATGGGGAGAGAGTGG	BnaC08g07160D
GCTTTGTCCTCTTCTCTTCCAGG	BnaCnng18080D
TGCTGGCTGAGATCAGACTCGGG	BnaCnng18080D
CAACGGAGGGTGAAGCCTCAAGG	BnaCnng41000D
CTTCCTCTGCTCATCCAAAGCGG	BnaCnng41000D
GTGAAGACGCTTCCGAGGTTGGG	BnaCnng41010D
AGGAGGCTTCCGATGAGTGGAGG	BnaCnng41010D
CGATGAGTGGAGGATAGGCTTGG	BnaCnng41010D
TGAACTGGTACACTTCCTGCTGG	BnaCnng75820D
TGCTGGCTGAGATCAGACTCAGG	BnaCnng75820D
CATGATGGTTACTGAAGCTGAGG	BnaCnng75820D
>>AT1G11870	BnaA08g25080D	BnaA09g47500D	BnaC08g15130D	BnaC08g41780D
GGCGCCAGCTGCACCAGCTTCGG	X	2	X	4	0.5
CAGCTGCACCAGCTTCGGTTCGG	X	2	X	4	0.5
CAAGAAGAATAGAATCCATGTGG	X	2	X	4	0.5
ACCTGAGTATTATCTCCACGAGG	BnaA08g25080D
AGCAAACACACCATCATCCTCGG	BnaA08g25080D
GGATTCATCGGCTATTAGAAAGG	BnaA08g25080D
GCAAACACACCATCATCCTTGGG	BnaA09g47500D
GTGTGTACAAACTTAGTAGCCGG	BnaA09g47500D
AAGACTCGCTTTGCCTTTCTTGG	BnaA09g47500D
ATGTCAAACTTGCGGTAAGCTGG	BnaC08g15130D
AGCAAACACACCATCATCCTTGG	BnaC08g15130D
GCAAACACACCATCATCCTTGGG	BnaC08g41780D
GGCGCCAGCTGCACCAGCTTCGG	BnaC08g41780D
>>AT1G11925	BnaA06g08410D	BnaA09g47420D	BnaAnng21930D	BnaC05g09780D	BnaC08g41650D	BnaC08g41670D
TGCTTTAAGAAGTGCAACAAAGG	1	2	3	4	5	6	1
GCTTTAAGAAGTGCAACAAAGGG	1	2	3	4	5	6	1
ATGTCATTGCTGCACTTGTACGG	1	X	X	4	X	X	0.3333
TAGGATCACCAAAACGAAATGGG	BnaA06g08410D
ACCTCTTACGACAGCAAGCACGG	BnaA06g08410D
TTCCTTTGAGACGACATACTCGG	BnaA06g08410D
TTACGACAACAATCACGACCTGG	BnaA09g47420D
ACTGACCATATCTGTTTCGGTGG	BnaA09g47420D
CACACGTCATCGCACTTGTACGG	BnaA09g47420D
TATGAGTACCACAACGAAATAGG	BnaAnng21930D
TCACCAGACCGTATCTGTCTCGG	BnaAnng21930D
CACATGTCATTGCACTTGTACGG	BnaAnng21930D
AGCATAGCTGCACATTCCATAGG	BnaC05g09780D
ACCTCTTACGACAGCAAGCACGG	BnaC05g09780D
ACCGCTACACAAGGTAAAAAAGG	BnaC08g41650D
GTCGCGATTGTTGTCGTAAAAGG	BnaC08g41650D
CACACGTCATCGCACTTGTACGG	BnaC08g41670D
GCTACACGAGGGAAAAAAGGTGG	BnaC08g41670D
>>AT1G12100	BnaA08g24910D	BnaC08g15360D
AATGAGCAGCAAGGTGTGTCTGG	1	2	1
GAGCAGCAAGGTGTGTCTGGTGG	1	2	1
AGCAGCAAGGTGTGTCTGGTGGG	1	2	1
AGCAGCAAGGTGTGTCTGGTGGG	BnaA08g24910D
AATGAGCAGCAAGGTGTGTCTGG	BnaC08g15360D
GAGCAGCAAGGTGTGTCTGGTGG	BnaC08g15360D
>>AT1G12260	BnaA06g08290D	BnaA08g24840D	BnaA09g47260D	BnaC05g09630D	BnaC08g15440D	BnaC08g41360D
GTTGGGTGAAATCTAAAACCCGG	1	2	3	4	5	6	1
GGGTGAAATCTAAAACCCGGAGG	1	2	3	4	5	6	1
GGAAGTTGGAGGAATGATAAAGG	X	2	X	X	5	X	0.3333
GGGATCTCCAGTCCGTGACCTGG	BnaA06g08290D
CTATACATGAATAGTGGGAACGG	BnaA06g08290D
TATACATGAATAGTGGGAACGGG	BnaA06g08290D
GAAAGCCACTGGAAGAGATAAGG	BnaA08g24840D
TATAGCCTTATCTCTTCCAGTGG	BnaA08g24840D
TCCCATATGAAAAAGGCTGGTGG	BnaA09g47260D
TCCCATTCGTCTAATAACTGCGG	BnaA09g47260D
CCCATTCGTCTAATAACTGCGGG	BnaA09g47260D
GTTGCTTGTTCCGTAAGGAAGGG	BnaC05g09630D
TGCTATTACTATTAGCTTGTTGG	BnaC05g09630D
ATACATGAATAGCGGGAACGAGG	BnaC05g09630D
GAAAGCCACTGGAAGAGATAAGG	BnaC08g15440D
TCCCATTCGTCTAATAACTGCGG	BnaC08g41360D
GGTGAAATCTAAAACCCGGAGGG	BnaC08g41360D
>>AT1G12410	BnaA06g08170D	BnaA07g36020D	BnaA07g36030D	BnaA09g47140D	BnaC02g33850D	BnaC03g14690D	BnaC04g29330D	BnaC04g41550D	BnaC05g09420D	BnaC06g25070D	BnaC08g41260D	BnaCnng62830D
CAGCACCAGCTGGTGACGTGAGG	1	X	X	X	X	X	X	X	9	X	X	X	0.1667
AGCACCAGCTGGTGACGTGAGGG	1	X	X	X	X	X	X	X	9	X	X	X	0.1667
GTGAGGGCGATTCTTGACAATGG	X	X	X	4	X	X	X	X	9	X	X	X	0.1667
AGCCTGCAAGGTTATAGGCAAGG	BnaA06g08170D
AAGGTACATATAAATCCTCCTGG	BnaA06g08170D
AGTGCCATACAGAAACAGAGAGG	BnaA06g08170D
TGGAGAGCGATCCTTAACAATGG	BnaA07g36020D
TGGTGCAGCTCGTGGTCAGCTGG	BnaA07g36020D
AAGATTTGAGCAGATTGAAAAGG	BnaA07g36030D
ATTGCCAAGTTCCTTCTTCTCGG	BnaA09g47140D
CGGTGGGAACACATTGTGTTGGG	BnaA09g47140D
ATACAGGGCAGCCTGCGGAAAGG	BnaA09g47140D
GAGCTGCACCAGCAGGTGACTGG	BnaC02g33850D
ATCGCTCTCCAGTCACCTGCTGG	BnaC02g33850D
TGGAGAGCGATCCTTAACAATGG	BnaC03g14690D
GGTTTGCGATGCCATTGTTAAGG	BnaC03g14690D
TGGAGAGCGATCCTTAACAATGG	BnaC04g29330D
GAGCTGCACCAGCAGGTGACTGG	BnaC04g41550D
GAATTTGAATAGGAGTTCTGTGG	BnaC04g41550D
AAGGTACATATAAATCCTCCTGG	BnaC05g09420D
TGGAGAGCGATCCTTAACAATGG	BnaC06g25070D
TAGACCACCGCGCATCAAAGCGG	BnaC08g41260D
CGCAGGCTGCCCTGTATTGTTGG	BnaC08g41260D
GAGCTGCACCAGCAGGTGACTGG	BnaCnng62830D
>>AT1G12430	BnaA06g08140D	BnaC05g09400D	BnaC08g41190D
ACCAGCAGCAACTCTGTGAATGG	1	2	X	0.6667
TGTTCAAATAGTTTAGCTACAGG	1	2	X	0.6667
TCAAATAGTTTAGCTACAGGAGG	1	2	X	0.6667
TCTGTGAACCATGTCTCTCTAGG	BnaA06g08140D
TTCCTCTAATGCTGGAGCAATGG	BnaA06g08140D
GCAACCATCCGGAGGGTTTGAGG	BnaC05g09400D
CAACCATCCGGAGGGTTTGAGGG	BnaC05g09400D
GCTGAAGAAAGACTTGCACTTGG	BnaC08g41190D
AAAGTATCAGAATGATTACATGG	BnaC08g41190D
ACTCTCCTCCATCTTCTTTATGG	BnaC08g41190D
>>AT1G12570	BnaA08g24680D	BnaCnng31540D	BnaCnng33370D	BnaCnng33400D
>>AT1G12610	BnaA09g47030D	BnaAnng36290D	BnaC08g15650D	BnaC08g41070D	BnaCnng31550D
CTCTCCTTATGACATCCGGGTGG	X	2	3	X	X	0.4
CTCCGGCACCGGGAGACGCCAGG	X	2	3	X	X	0.4
TCTTCTTCCATGTAACCATTAGG	X	2	3	X	X	0.4
GGATCGGTTGATTCCGGCACCGG	BnaA09g47030D
TCCCCTCCCATATAAGACCGCGG	BnaA09g47030D
GGTAAGTCCCTAGCCAGATGCGG	BnaA09g47030D
ACATCCGGGTGGTTTGACTCCGG	BnaAnng36290D
GGGTGGTTTGACTCCGGCACCGG	BnaAnng36290D
TCCCGAGCCAAATGCGTTGCTGG	BnaC08g15650D
CAAATGCGTTGCTGGTGCGTCGG	BnaC08g15650D
TAACAACGATGATATTATGCTGG	BnaC08g41070D
CAACGATGATATTATGCTGGCGG	BnaC08g41070D
CGCCGTATTCCTCTGTAAACTGG	BnaCnng31550D
ACCCAGTTTACAGAGGAATACGG	BnaCnng31550D
GGCGGAGGAACGGCGACAAATGG	BnaCnng31550D
>>AT1G12640	BnaA06g08020D	BnaCnng31560D
ACTTGTATGTTCCACACAAGCGG	1	2	1
AACGAGGAAGTGGAGATTCGAGG	BnaA06g08020D
>>AT1G12770	BnaA08g24620D	BnaC08g15720D
CTTCTGTAAAGCCGGAAGATGGG	BnaC08g15720D
GTTATTGATATGTTATCTGATGG	BnaC08g15720D
TCTATAATATCATCATTCACGGG	BnaC08g15720D
>>AT1G12910	BnaA01g24900D	BnaA06g07780D	BnaA09g46770D	BnaC08g06410D	BnaC08g40840D	BnaCnng47790D	BnaCnng47800D	BnaCnng69170D	BnaCnng69180D
CGAGCTGGACGATCTCGACTCGG	X	X	3	X	X	6	X	X	X	0.2222
GAGAACCCGTGCAGATACCACGG	X	X	X	X	X	X	7	X	9	0.2222
ACTGAGCCGTGGTATCTGCACGG	X	X	X	X	X	X	7	X	9	0.2222
GTGCCTCAACAGCACTTTCTCGG	BnaA01g24900D
TCAACAGCACTTTCTCGGTTTGG	BnaA01g24900D
CGCCATTAGACTCGTCGAGCTGG	BnaA01g24900D
AACCCTGAGAATTTGCATCTTGG	BnaA06g07780D
CAACCAAGATGCAAATTCTCAGG	BnaA06g07780D
AACCAAGATGCAAATTCTCAGGG	BnaA06g07780D
CCAGATCGTGCACGTCGTATCGG	BnaA09g46770D
CTCGAAGTCCCGATCCGTCTCGG	BnaA09g46770D
AGCCTGAGAATCATCCCCCGCGG	BnaA09g46770D
TTCATTGCGTAGATCTGCCATGG	BnaC08g06410D
TCAACAGCACTTTCTCGGTTTGG	BnaC08g06410D
CTCGAAGTCCCGATCCGTCTTGG	BnaC08g40840D
CAGATATGAGACGAGCTATGAGG	BnaC08g40840D
GATCGTCGGCGATTCGCCATAGG	BnaCnng47790D
CGTCGGCGATTCGCCATAGGCGG	BnaCnng47790D
ATCGGAGCGGATCTCGCCGTTGG	BnaCnng47790D
TACCGCGGGGGATGATTCTCAGG	BnaCnng47800D
ATGATTCTCAGGCTTTGATTTGG	BnaCnng47800D
CGTCGGCGATTCGCCATAGGCGG	BnaCnng69170D
GGGCGCTGGCACTCCTTATCCGG	BnaCnng69170D
TACCGCGGGGGATGATTCTCAGG	BnaCnng69180D
>>AT1G12980	BnaA06g07730D	BnaA09g46720D	BnaC05g09160D	BnaC08g40750D
CCAACCATCGGTGGAGATGGCGG	X	2	X	4	0.5
ACCATCGGTGGAGATGGCGGTGG	X	2	X	4	0.5
CCAGAATCAGAATGTTCTTGCGG	X	2	X	4	0.5
GTACGTAAAATCACTGTCTGCGG	BnaA06g07730D
CGTAAAATCACTGTCTGCGGCGG	BnaA06g07730D
GTAAAATCACTGTCTGCGGCGGG	BnaA06g07730D
GTTAGTCGCTGTTTCGTGAGAGG	BnaA09g46720D
GTGTTCATCTTCAGAGGTGACGG	BnaA09g46720D
ATCTTCAGAGGTGACGGTATAGG	BnaA09g46720D
TGCCCGATCATCGGCGGCGTCGG	BnaC05g09160D
TCTTCCAAGAGACCAGAGTCGGG	BnaC05g09160D
GAGAATCTAGGCTCGGCAACAGG	BnaC08g40750D
TCGGCAACAGGATTAGTAACAGG	BnaC08g40750D
>>AT1G13230	BnaA06g07500D	BnaC05g08950D
TGGAAACATCTAAAATGACCAGG	1	2	1
TTGCATCCTTTCAATGTTGTTGG	1	2	1
CTTCCAAGAAGTTATTGCTTAGG	1	2	1
GGCAAAGCTTCAAGTTCGGATGG	BnaA06g07500D
AAGTTCGGATGGAACAAAACCGG	BnaA06g07500D
GTGCATGACTTCACTCCAAGAGG	BnaC05g08950D
CAAGAACTACCAGCGACTTCAGG	BnaC05g08950D
>>AT1G13290	BnaA06g07460D	BnaA09g46350D	BnaC05g08940D
GACAGAACAAGAGAACTGAGTGG	1	2	3	1
ACAGAACAAGAGAACTGAGTGGG	1	2	3	1
AGAACTGAGTGGGACCGACAAGG	1	2	3	1
ACGTCATTAGGGTTTGTTAAAGG	BnaA06g07460D
GAGGGTTTGACGGCGAGGCAGGG	BnaA06g07460D
CGGCGAGGCAGGGACAGTATTGG	BnaA06g07460D
ATCTTCCTCTCCGTGTCCAATGG	BnaA09g46350D
ACCGACAAGGATCTGAGAAAGGG	BnaA09g46350D
CAAGGATCTGAGAAAGGGAAGGG	BnaA09g46350D
ATTCGTAGAAGGTTTAGTGCTGG	BnaC05g08940D
CGTAGAAGGTTTAGTGCTGGTGG	BnaC05g08940D
>>AT1G13400	BnaA05g16310D	BnaA06g07380D	BnaA08g24290D	BnaC08g15880D
ACGGCCACCGCAACCGCTATTGG	1	2	X	X	0.5
CACCGCAACCGCTATTGGTTAGG	1	2	X	X	0.5
ACCGCAACCGCTATTGGTTAGGG	1	2	X	X	0.5
AATGACGGAGGTCCTTGATGAGG	BnaA05g16310D
GACGGAGGTCCTTGATGAGGAGG	BnaA05g16310D
AATGGGAAAAAGTCTCTAGATGG	BnaA05g16310D
GACGGAGGTCCTTGATGAGGAGG	BnaA06g07380D
AATCTTGGTGGATACATCATTGG	BnaA08g24290D
CAAGGTAGATTCGAAGGAAGCGG	BnaC08g15880D
TTCAAATCTCAAGCTCTCGGTGG	BnaC08g15880D
>>AT1G13440	BnaA01g33660D	BnaA05g33200D	BnaC01g40210D	BnaC05g47450D
AGCCTTCTTGATCTCGTCGTAGG	1	2	3	4	1
CAAAGCTGCTGCTCACTTGAAGG	1	2	3	4	1
GCTACTCAGAAGACTGTTGATGG	1	2	3	4	1
AAGGCAGTTAGTGGTGCAACTGG	BnaA01g33660D
TGCAGCTTTCTCGAGTCTAACGG	BnaA01g33660D
GGGTTACAGTACCCGTGTGGTGG	BnaA01g33660D
CATGGTGTTTCCATTGACCGTGG	BnaA05g33200D
AAGGTTCTTCCACAGCTTAACGG	BnaA05g33200D
TGTCATCTCTGCACCTAGCAAGG	BnaA05g33200D
GGCAAGGGGAGCAAGGCAGTTGG	BnaC01g40210D
GGAAATTGATTGACGCGATTAGG	BnaC01g40210D
TTTCCTAATTAACGAGTCAGGGG	BnaC01g40210D
CAACTGAGACGTCAACGGTGGGG	BnaC05g47450D
ACTGTCGTACTTGAACATGTAGG	BnaC05g47450D
AGTAGACTCAACAACGAAGTCGG	BnaC05g47450D
>>AT1G13580	BnaA02g27470D	BnaA06g08570D	BnaA09g46200D	BnaC02g35410D	BnaC07g22730D	BnaC08g40260D
CTTGGTTTGTTGATCAGGCCAGG	X	X	3	X	X	6	0.3333
TTTGTTGATCAGGCCAGGACTGG	X	X	3	X	X	6	0.3333
TCAGGCCAGGACTGGTCTCCAGG	X	X	3	X	X	6	0.3333
GTCTCATTTACTATCCTTTCTGG	BnaA02g27470D
TACTACTACATATATATTGGTGG	BnaA06g08570D
ACTACTACATATATATTGGTGGG	BnaA06g08570D
ATTTACTACTACATATATATTGG	BnaA06g08570D
TTTGTTGATCAGGCCAGGACTGG	BnaA09g46200D
CAGGCCAGGACTGGTCTCCAGGG	BnaA09g46200D
GTGAAACAAGTACAGGATCGAGG	BnaC02g35410D
GTACTTGTTTCACAAGCATCCGG	BnaC02g35410D
GTGCTGCAAAGGATCCAGAAAGG	BnaC07g22730D
GTACTTGCTTAACAAGCATCCGG	BnaC07g22730D
CTTGGTTTGTTGATCAGGCCAGG	BnaC08g40260D
CAGGCCAGGACTGGTCTCCAGGG	BnaC08g40260D
>>AT1G13710	BnaA06g08740D	BnaA09g57150D	BnaC05g10050D	BnaC08g40210D
CCACATGTTGACCATAGCTATGG	1	2	3	4	1
ACCATAGCTATGGTTCCTGCAGG	1	2	3	4	1
CCATAGCTATGGTTCCTGCAGGG	1	2	3	4	1
CCATAGCTATGGTTCCTGCAGGG	BnaA06g08740D
GGTTCCTGCAGGGACAAGGTTGG	BnaA06g08740D
CCATAGCTATGGTTCCTGCAGGG	BnaA09g57150D
AGTTGCTTGGGATATTTAACTGG	BnaA09g57150D
CCATAGCTATGGTTCCTGCAGGG	BnaC05g10050D
ACCATAGCTATGGTTCCTGCAGG	BnaC08g40210D
TACACCTCTTCCTCACTCCTTGG	BnaC08g40210D
>>AT1G13800	BnaA06g08830D	BnaA09g46550D	BnaC05g10140D
TCGTTTCTGAAACGAATCGAAGG	X	2	3	0.6667
ACCGTGTACGTTACCACATCAGG	1	X	3	0.6667
CCGGTAATAGCTGTTGATCAAGG	1	X	3	0.6667
GATTTCTTCCGGATTGTTCTTGG	BnaA06g08830D
AATAAACATTCTTGGGGAGAGGG	BnaA06g08830D
AAGTCTAATGAACCGTTCAAAGG	BnaA06g08830D
TGTGAGGAGAATAACCAAATCGG	BnaA09g46550D
ACAAAGGTTTCTGATAACAGTGG	BnaA09g46550D
AGAAACGATAAAGCACGATAAGG	BnaA09g46550D
CCCTCTTCACATCCAACTTAGGG	BnaC05g10140D
TGTCCGAGATACACGTCTCTCGG	BnaC05g10140D
>>AT1G13980	BnaA06g08910D	BnaAnng30620D	BnaC05g10230D
CTCCACTGGTTTAGTCACAATGG	1	2	3	1
ACTCACCTTTCATTCCTGATTGG	1	2	3	1
CACCTTTCATTCCTGATTGGTGG	1	2	3	1
GTGTACTCATCAAGATGGACAGG	BnaA06g08910D
CAATCCATTACTGATCCTCTCGG	BnaA06g08910D
CAGCGCAAGAATGTGCATTGCGG	BnaA06g08910D
TGAGGTGACGGATCCTGCATCGG	BnaAnng30620D
AGCACAACCTCTTCCGATGCAGG	BnaAnng30620D
TCGCTACTCTCGAAGTCCTCAGG	BnaAnng30620D
AAGGCGTGTACTCATCAAGATGG	BnaC05g10230D
CAATCCATTACTGATCCTCTCGG	BnaC05g10230D
>>AT1G14440	BnaA06g09270D	BnaA09g57080D	BnaC05g10680D	BnaC08g39630D
TGTTGTGCATCCAAACCTTAAGG	1	2	3	4	1
CAAGAACCATGCAGCAGCAATGG	1	2	3	4	1
AAGAACCATGCAGCAGCAATGGG	1	2	3	4	1
GTAAGGTGGGGGTCTAGACGCGG	BnaA06g09270D
AGGTGGGGGTCTAGACGCGGTGG	BnaA06g09270D
GTCTTGTTCCATGAAGTCACCGG	BnaA06g09270D
AACCATGCAGCAGCAATGGGAGG	BnaA09g57080D
CAAGAACCATGCAGCAGCAATGG	BnaA09g57080D
AGGTGGGGGTCTAGACGCGGTGG	BnaC05g10680D
AACCATGCAGCAGCAATGGGAGG	BnaC08g39630D
CATGATCATTTGGTGAGGCATGG	BnaC08g39630D
>>AT1G14740	BnaA06g09540D	BnaC02g18170D	BnaC05g10910D	BnaC08g16400D	BnaCnng52080D	BnaCnng70560D
GAAACTGTTCATCATTGCATCGG	1	X	3	X	X	X	0.3333
CAAGGTCTCTTTGCAAAGATCGG	1	X	3	X	X	X	0.3333
ACTTCGAAACGATGTCGTATAGG	1	X	3	X	X	X	0.3333
CTTCGCCGGCGCACCAGATGCGG	BnaA06g09540D
GATGCGGTCGTCTTTCTCGACGG	BnaA06g09540D
TTTGAAGACACATGAATCAATGG	BnaC02g18170D
CACCTTGAACTCAGAGTATACGG	BnaC02g18170D
TCGCATCAAAGGATTTGGATTGG	BnaC02g18170D
TCTCCACCAACTCGTTCATGGGG	BnaC05g10910D
CCAACTCGTTCATGGGGATACGG	BnaC05g10910D
GTACTTAAGCCCTGTTCTCACGG	BnaC05g10910D
ATTACAGGAACATGAAGCTGAGG	BnaC08g16400D
GGGCTTAAGTACTTCCTCTCTGG	BnaC08g16400D
CGGCTAGCAATACTTGTAGTTGG	BnaC08g16400D
AGATCCGTTGGTTCCTTCGCTGG	BnaCnng52080D
GAGTAGTCGGAAGAACTCGACGG	BnaCnng52080D
CGACGAGGTCAAACAAGAAGTGG	BnaCnng52080D
CACCGTATACTCTGAGTTCAAGG	BnaCnng70560D
GCTGTTGATTATTCAAGTAACGG	BnaCnng70560D
>>AT1G14830	BnaA08g31390D	BnaA09g45430D	BnaC05g35440D	BnaC08g16440D	BnaC08g39260D
GTTTATGTACGCACTCACGTTGG	1	X	X	4	X	0.4
TTCTGAAGTGATTATCGGAGTGG	1	X	X	4	X	0.4
TCGGAGTGGATGTCTGCGTTTGG	1	X	X	4	X	0.4
TGGATGTCTGCGTTTGGTGGTGG	BnaA08g31390D
TTGGTGGTGGAGCATTTCGCTGG	BnaA08g31390D
TATATGTCTGCGTTTGGCTGTGG	BnaA09g45430D
ATATGTCTGCGTTTGGCTGTGGG	BnaA09g45430D
AATATTCACGCTCCTTCCTCCGG	BnaA09g45430D
TTCTGAAGTTGTCGTTAACCTGG	BnaC05g35440D
TAACTCAACTGTGAGGTAGCTGG	BnaC05g35440D
TTTGTGATGGGGCATTTCTCGGG	BnaC05g35440D
TGGATGTCTGCGTTTGGTGGTGG	BnaC08g16440D
CACAGGCTGATATCAATAAGAGG	BnaC08g16440D
ATATGTCTGCGTTTGGCTGTGGG	BnaC08g39260D
ATGTCAGCGACGATACTTTCCGG	BnaC08g39260D
>>AT1G15080	BnaA09g45250D	BnaC07g10420D	BnaC08g39060D
CGTTGTTTCCCTGATGGTAGAGG	1	2	3	1
GTTGTTTCCCTGATGGTAGAGGG	1	2	3	1
GAATTGTAGATAACAAAACGAGG	1	X	3	0.6667
ACCGTCTGGATCATATGGAGGGG	BnaA09g45250D
CCGTCTGGATCATATGGAGGGGG	BnaA09g45250D
ACCAACGCTGCAACTAGTAGAGG	BnaA09g45250D
GCGGCGACGGATCTCGAATACGG	BnaC07g10420D
GTCGTCAGTCTCCATTGACGAGG	BnaC07g10420D
TCGTCAGTCTCCATTGACGAGGG	BnaC07g10420D
GCTTTGCCACATGCCCTCTCTGG	BnaC08g39060D
CTCTCCAACAAAACGGTGAAAGG	BnaC08g39060D
GGATAAGCCAGTCATGCATGTGG	BnaC08g39060D
>>AT1G15110	BnaA06g38300D	BnaAnng23770D	BnaC05g11410D	BnaC05g24040D	BnaC07g12120D	BnaC08g39040D	BnaCnng55530D
TTAGCGTCTCTTTCTCTCTAAGG	X	2	X	X	X	6	X	0.2857
GGTTTCGAGGAGGGATCCAGAGG	X	2	X	X	X	6	X	0.2857
AGTACTTGAATAAAACGCCAAGG	X	2	X	X	X	6	X	0.2857
ATCAGCACCGTATGATCTCTCGG	BnaA06g38300D
CATAGCAATTCCAACAACGCGGG	BnaA06g38300D
TCATAGCAATTCCAACAACGCGG	BnaA06g38300D
TCAGGCCACATCCTGCTATCTGG	BnaAnng23770D
CCAGCCTAACATTATTGGCAAGG	BnaAnng23770D
TGGCAAGGTGAAAAGGACACTGG	BnaAnng23770D
CCACTCGTCTTTGTCCCAATGGG	BnaC05g11410D
CCCATGCAGTCCATGGATCAAGG	BnaC05g11410D
GCCACTCGTCTTTGTCCCAATGG	BnaC05g11410D
CATAGCTAGAGCTGAAGCCCTGG	BnaC05g24040D
CAAAGACATAATCAGATTCCAGG	BnaC05g24040D
ATGACAGCCCACTCATATGTTGG	BnaC05g24040D
TAAAGACATAATCAGATTCCAGG	BnaC07g12120D
ACATGCCAAGCAGCTTGCAGTGG	BnaC07g12120D
ATGTCTTTAATGAATCTTCAAGG	BnaC07g12120D
CATTCTGTTGGCTATCAACAGGG	BnaC08g39040D
GAATTGTATTCCCGTATAGTTGG	BnaC08g39040D
GGCATCCACTGCAAGCTGCTTGG	BnaCnng55530D
>>AT1G15320	BnaA06g10000D	BnaC03g58710D	BnaC03g62860D	BnaC04g24930D	BnaC05g11620D	BnaCnng64480D
AAGGTTAGAGACATCCTTCAAGG	1	2	3	4	5	6	1
ATGTCTTTCAGAAGAACCACCGG	X	2	X	X	X	6	0.3333
CTTCTGAAAGACATCACTCCTGG	X	2	X	X	X	6	0.3333
CCTCCTCAATACGTATCTCACGG	BnaA06g10000D
GTTAGAGACATCCTTCAAGGAGG	BnaA06g10000D
CGCGACTGAGCATTGCAGAGCGG	BnaA06g10000D
CTTCAAGGAGGTTGAAACCATGG	BnaC03g58710D
CATGGTTTCAACCTCCTTGAAGG	BnaC03g58710D
AGGTTCACTCTTTGCATGATGGG	BnaC03g62860D
CTTCAAGGAAGTTGAAACCATGG	BnaC03g62860D
CAGCTCATCAAGCTCCGACCTGG	BnaC03g62860D
AGGTTCACTCTTTGCATGATGGG	BnaC04g24930D
CTTCAAGGAGGTTGAAACCATGG	BnaC04g24930D
GCATTGCAGAGCGGTGAAAAGGG	BnaC05g11620D
CATTGCAGAGCGGTGAAAAGGGG	BnaC05g11620D
AGAGCGGTGAAAAGGGGAGGTGG	BnaC05g11620D
AGGTTCACTCTTTGCATGATGGG	BnaCnng64480D
>>AT1G15360	BnaA06g10040D	BnaA08g23880D	BnaC05g11660D	BnaC08g16630D	BnaCnng57070D
GTACAGACGAAGAAGTTCAGAGG	1	2	3	4	5	1
CGAAGAAGTTCAGAGGTGTCAGG	1	2	3	4	5	1
GAGGTGTCAGGCAACGCCATTGG	1	2	3	4	5	1
CCAGACTCCGATGTGGGAGCTGG	BnaA06g10040D
AGCTGGCTGTGTCAAGACGCAGG	BnaA06g10040D
GGCTGTGTCAAGACGCAGGCAGG	BnaA06g10040D
AGGTGTCAGGCAACGCCATTGGG	BnaA08g23880D
GGTGTCAGGCAACGCCATTGGGG	BnaA08g23880D
AGCTGGCTGTGTCAAGACGCAGG	BnaC05g11660D
CAGCGACCCAAGAACCCCAATGG	BnaC08g16630D
GGCAACGCCATTGGGGTTCTTGG	BnaC08g16630D
GCAACGCCATTGGGGTTCTTGGG	BnaC08g16630D
GACCCAACTGGAATCAGACTTGG	BnaCnng57070D
ACTGGAATCAGACTTGGAACCGG	BnaCnng57070D
TGATTCCAGTTGGGTCATGACGG	BnaCnng57070D
>>AT1G15415	BnaA06g10120D	BnaA08g23850D	BnaC05g11740D	BnaC08g16670D
TTAGGATTCTTATTGTCCAAAGG	1	X	3	X	0.5
TAGGATTCTTATTGTCCAAAGGG	1	X	3	X	0.5
CATGTGCTTGGCCCACGATTTGG	1	X	3	X	0.5
GGAGGATGACCAGGCATGCTTGG	BnaA06g10120D
TGCTTGGCCCACGATTTGGCCGG	BnaA06g10120D
CATGGCACATGACGCATCAGAGG	BnaA06g10120D
TGCTTGGCCCACGATTTGGCCGG	BnaC05g11740D
ATGACCAGGCATGCTTGGACAGG	BnaC05g11740D
CTTGGACAGGTTGTGTTGTTAGG	BnaC08g16670D
>>AT1G15520	BnaA06g10230D	BnaA09g56880D	BnaA09g56890D	BnaC05g11890D	BnaC08g38830D
AGTGATGAATGCTGTGAGAGCGG	1	X	X	4	X	0.4
GCGGCTTCGATGAAGCTTATAGG	1	X	X	4	X	0.4
CGGCTTCGATGAAGCTTATAGGG	1	X	X	4	X	0.4
TGAAAGTACCACACCACCCAAGG	BnaA06g10230D
TAAACAATGCTGAAGCCATCTGG	BnaA06g10230D
AGTGATGAATGCTGTGAGAGCGG	BnaC05g11890D
ATAGGGATCTTGAGAAGCCAAGG	BnaC05g11890D
GGCAGAGAGTAAACCCATGCAGG	BnaC05g11890D
ACGGAGGCGATGTGGTGGTTAGG	BnaC08g38830D
GGATTCAGAGAAGGTTTCTTGGG	BnaC08g38830D
TGGATTCAGAGAAGGTTTCTTGG	BnaC08g38830D
>>AT1G15690	BnaA06g10340D	BnaA06g38620D	BnaA07g35600D	BnaA08g23780D	BnaA09g56670D	BnaC05g11930D	BnaC06g39260D	BnaC06g40530D	BnaC08g16730D	BnaC08g38730D
CGAAGACGCGCCACGATCGGCGG	X	X	3	X	X	X	X	8	X	X	0.2
ATACCACTGGAACAGCGAGAAGG	X	X	3	X	X	X	X	8	X	X	0.2
TTGACGCATGTTGCATAGTCTGG	X	X	3	X	X	X	X	8	X	X	0.2
GTAGCCGTTCTTACCATTGTTGG	BnaA06g10340D
CGGAAGACGACGATGCGCCTTGG	BnaA06g10340D
ATGCCGACCACCGCACAGACAGG	BnaA06g10340D
CCTCGCTTCCAGAGTGGTTCTGG	BnaA06g38620D
TCCCGTCTTCACGCCACGATCGG	BnaA06g38620D
AACCACAAGCTCGACGAGCTCGG	BnaA06g38620D
ATTCCCACCACCGCGCACACCGG	BnaA07g35600D
TATAACGTTGGTTGCTGCTCCGG	BnaA07g35600D
GGATCTCCGTCCAGAGCTCCGGG	BnaA08g23780D
CTACGGTGTGGACTCCTGCACGG	BnaA08g23780D
GACTCCTGCACGGCTCACAAAGG	BnaA08g23780D
TGAATCCCTCGACGGAGCCGAGG	BnaA09g56670D
GGATCTCCGTCCAGAGCTCCGGG	BnaA09g56670D
CGTATCTGTACTCGGTGAACAGG	BnaC05g11930D
CGCACTTGGCGACGACGCTCTGG	BnaC05g11930D
AAGTGCAGCTCTTAAGATGGTGG	BnaC06g39260D
GGGAAGTGCAGCTCTTAAGATGG	BnaC06g39260D
GGTCACCGCGCCGAGGACGAAGG	BnaC06g40530D
TTCCGAAGACGCGCCACGATCGG	BnaC06g40530D
GGATCTCCGTCCAGAGCTCCGGG	BnaC08g16730D
AAAGGCACCGAACAGAGCCAAGG	BnaC08g16730D
ATCTTGTCGGTAAAATCGAGAGG	BnaC08g16730D
ACCACCAGCATTGTCACTGATGG	BnaC08g38730D
GCAAAGAGTCTAGGACCAAAGGG	BnaC08g38730D
>>AT1G15750	BnaA06g10370D	BnaA09g56690D	BnaC05g11960D	BnaC08g38720D
CTAGACATCCAACCAGCAAGAGG	1	2	3	4	1
TTTATATCCGGATTTGGCCTTGG	1	2	3	4	1
TTATATCCGGATTTGGCCTTGGG	1	2	3	4	1
GATGGGTAGTCTAAAGCAGTTGG	BnaA06g10370D
GGGTAGTCTAAAGCAGTTGGAGG	BnaA06g10370D
GGTGAGGCCGTTGGTTGAAATGG	BnaA06g10370D
GGTGAGGCCGTTGGTTGAAACGG	BnaA09g56690D
CTAGCTGGTAGATACGCAGAAGG	BnaA09g56690D
TAGCTGGTAGATACGCAGAAGGG	BnaA09g56690D
ACGTGTTCAGACTCTGCTGATGG	BnaC05g11960D
CGTGTTCAGACTCTGCTGATGGG	BnaC05g11960D
CTAGCTGGTAGATACGCAGAAGG	BnaC08g38720D
TAGCTGGTAGATACGCAGAAGGG	BnaC08g38720D
>>AT1G16060	BnaA06g10760D	BnaC05g12270D
TACATAGAGCTGCGTTGTGGAGG	1	2	1
CAATATACTCTTCCTTCGACTGG	1	2	1
CTATACATAGAGCTGCGTTGTGG	1	2	1
TGGTAACGGCGTTAAGTCCACGG	BnaA06g10760D
CTATACATAGAGCTGCGTTGTGG	BnaA06g10760D
AAAGGTTACCATAAGTTCCGAGG	BnaC05g12270D
>>AT1G16500	BnaA09g56300D	BnaAnng27380D	BnaC08g38360D	BnaCnng29510D
TCGCAAACGTCCTCCTCTTCTGG	X	2	X	4	0.5
GAGCAGACTTCACCTTGTCGAGG	X	2	X	4	0.5
AGCAGACTTCACCTTGTCGAGGG	X	2	X	4	0.5
CTTGACCTGAAAGTCCCCAACGG	BnaA09g56300D
AACCGCCACGGGAGACGACCCGG	BnaAnng27380D
CACGGGAGACGACCCGGCGGTGG	BnaAnng27380D
CTTGACCTGAAAGTCCCCAACGG	BnaC08g38360D
AGGTGACTAGTTTCAGTTCAAGG	BnaCnng29510D
CAAGGCTTGTGTCGTCGAAGAGG	BnaCnng29510D
>>AT1G16570	BnaA06g38380D	BnaA09g56260D	BnaC08g38320D
AGAGCGTGATATTGCATACGAGG	1	2	3	1
CTGTTAAGTGGGCGAGTTCATGG	1	2	3	1
TTAAGTGGGCGAGTTCATGGAGG	1	2	3	1
GATACCAAAATTCTCATCAGGGG	BnaA06g38380D
GGATACCAAAATTCTCATCAGGG	BnaA06g38380D
ATTAAGGCATCGCAGTTCCCCGG	BnaA06g38380D
AGAGCTTGTGTAGTGGTACTTGG	BnaA09g56260D
GTAGTGGTACTTGGAGATCTTGG	BnaA09g56260D
GTAGTGGTACTTGGAGATCTTGG	BnaC08g38320D
AAGATTAAACCTCAAACATGTGG	BnaC08g38320D
>>AT1G16610	BnaA06g11140D	BnaA08g23570D	BnaA09g56240D	BnaC05g12680D	BnaC08g16960D	BnaC08g38300D
GAGGAAGACCCAGAGACGGAAGG	1	X	X	4	X	X	0.3333
GGTGAACGACGTCCACGACTTGG	1	X	X	4	X	X	0.3333
CGGATTGGAGATCTTCTTAGAGG	1	X	X	4	X	X	0.3333
GATCGGCTACGTCTGCGGATTGG	BnaA06g11140D
AGAGGACTGCGTAGTCTCCTTGG	BnaA06g11140D
GGACTGCGTAGTCTCCTTGGAGG	BnaA06g11140D
AGAGGACTGCGTAGTCTCCTTGG	BnaA08g23570D
GATCGGCTACGTCTGCGGATAGG	BnaA09g56240D
GGCTCCCCTAGAAGAATCCGTGG	BnaA09g56240D
GTCCAGCTGGGAGACGTGGGAGG	BnaA09g56240D
GACCTTGAACGATAGCGAACAGG	BnaC05g12680D
TAGCGAACAGGTCTACGAACTGG	BnaC05g12680D
GGACTGCGTAGTCTCCTTGGAGG	BnaC08g16960D
GTATCACCACGACGGCGGATAGG	BnaC08g16960D
GATCGGCTACGTCTGCGGATAGG	BnaC08g38300D
CGACGGCGGATAGGAGAGCTAGG	BnaC08g38300D
>>AT1G17060	BnaA08g23390D	BnaA09g45190D	BnaAnng25600D	BnaC08g17160D	BnaC08g38010D	BnaC08g38020D	BnaC08g38040D	BnaCnng42960D
TCTCTGTATCTCCTTCTCTTTGG	X	2	X	4	X	X	X	X	0.25
AAAGAGAAGGAGATACAGAGAGG	X	2	X	4	X	X	X	X	0.25
ACATCGTCTCCCCAAAGATCAGG	X	2	X	X	X	6	X	X	0.25
TATTGTGATCACAACTCCTTCGG	BnaA08g23390D
GACGAGATCTCTAAGGCGTTTGG	BnaA08g23390D
TTGCAACTCGAGTTGAATGCTGG	BnaA08g23390D
AGAGTCTAAGCACTTCATGCAGG	BnaA09g45190D
AGTCATCTATAAGATCGTCAAGG	BnaA09g45190D
AAAGAGCTTAGCTTGCAACATGG	BnaA09g45190D
AGTAAGCTGGAGAGTAGAGTCGG	BnaAnng25600D
AGTAGAGTCGGAGAACTTCATGG	BnaAnng25600D
ATTCTGACCAGCTAGATAGAAGG	BnaAnng25600D
TTGCAACTCGAGTTGAATGCTGG	BnaC08g17160D
GTAAGAAAAGTGTTCTTGATCGG	BnaC08g17160D
TGACTATGTGATCCAATCTTTGG	BnaC08g38010D
TTGGTTAAGGCCAAAGAGGTTGG	BnaC08g38010D
TTTCGATCTTGATACTGAATTGG	BnaC08g38010D
CAACAAGAACAGATCGATCTTGG	BnaC08g38020D
ATTGTGATCACAACTCCTTCGGG	BnaC08g38020D
AAAGAGCTTAGCTTGCAACATGG	BnaC08g38040D
TGACCCTGATCTTTGGGGAGAGG	BnaC08g38040D
AGGCCTTACAGTCATCTATCAGG	BnaCnng42960D
CATGCGAGGGAGAAAATCAGCGG	BnaCnng42960D
>>AT1G17070	BnaA02g26750D	BnaA09g45180D	BnaAnng25590D	BnaC02g48020D	BnaC05g13210D	BnaC05g13220D	BnaC08g38000D	BnaC08g47410D
CGTTTGCTGAAAGCTCTTGCGGG	X	2	X	X	X	X	7	X	0.25
TTGTGGATCTCGTCGAACCTCGG	X	2	X	X	X	X	7	X	0.25
TGCATCCTCAATAAGTCATCAGG	X	2	X	X	X	X	7	X	0.25
CTTTGAGCCAGCTCGAGCTAAGG	BnaA02g26750D
GCCAGCTCGAGCTAAGGCTAAGG	BnaA02g26750D
GCCTTAGCCTTAGCTCGAGCTGG	BnaA02g26750D
TCCAGCCGTAGTACCAGTTGTGG	BnaA09g45180D
GATCTCGTCGAACCTCGGTTTGG	BnaA09g45180D
TCGGTTTGGCACGCAACCAGTGG	BnaA09g45180D
GAGGCGGCGCATGGATCGGGAGG	BnaAnng25590D
GCACATTTGAGGCCGAGGAATGG	BnaAnng25590D
GAGGCCGAGGAATGGTATTACGG	BnaAnng25590D
GCCAGCTCGAGCTAAGGCTAAGG	BnaC02g48020D
ACTTCGCCTCCTTGAAATCATGG	BnaC05g13210D
TAACCCACATCCGTATTACTCGG	BnaC05g13210D
TACGATCCCTAACAACCTCCTGG	BnaC05g13210D
GGTCTAAATCCTGGTTTGCCGGG	BnaC05g13220D
TTGATGCCTGCTATACGCACAGG	BnaC05g13220D
CAACTTATGCGACGTTACATAGG	BnaC05g13220D
GCAAGGCCAGCTGAAGTTTGGGG	BnaC08g38000D
TCGCAAGTTGTGCTGTAACTCGG	BnaC08g38000D
TACCCCATACCCATATTCTTGGG	BnaC08g38000D
CCTCAGAGATCGAAACCTTTCGG	BnaC08g47410D
CCGAAAGGTTTCGATCTCTGAGG	BnaC08g47410D
AAAGGTTTCGATCTCTGAGGAGG	BnaC08g47410D
>>AT1G17110	BnaA06g38410D	BnaA08g23330D	BnaC05g13250D	BnaC08g17200D
TCAAAGATTTGAGAGGCAACTGG	1	2	3	4	1
ATAAATTGTCAGATTGGTGATGG	1	2	3	4	1
TAAATTGTCAGATTGGTGATGGG	1	2	3	4	1
GAGGATTCTGCTAGCAGAAAGGG	BnaA06g38410D
ATGTCGATCATCATGCTTTGAGG	BnaA06g38410D
GTCTCTGTGCATGCAGATTTGGG	BnaA06g38410D
GCCTCTCAAATCTTTGACATAGG	BnaA08g23330D
GTTGCTCAAGTTCACACATAAGG	BnaA08g23330D
GCGTAAAGCATATAAAGAGGAGG	BnaA08g23330D
GGTTGGGGATGCCGAGCCTGAGG	BnaC05g13250D
GACATAGGAAATGTAATGACCGG	BnaC05g13250D
GTTGCTCAAGTTCACACATAAGG	BnaC08g17200D
>>AT1G17220	BnaA06g11540D	BnaA06g11550D	BnaA08g23240D	BnaAnng19950D	BnaC05g13400D	BnaC08g17260D
ATATCTGCAAAGGCTGGGGACGG	X	X	3	4	X	X	0.3333
TGCAAAGGCTGGGGACGGAAAGG	X	X	3	4	X	X	0.3333
CCATCTCACGCGCCACATCAAGG	X	2	X	X	5	X	0.3333
AAAGGTGGTTGAGGTCTTAAAGG	BnaA06g11540D
TGTCCCTCCACCACTCGCAAAGG	BnaA06g11540D
GCAAACTTATCAACCAATATAGG	BnaA06g11540D
ACATCACCGCCCCAATCTTCAGG	BnaA06g11550D
TATTAATAGCTATGACTATAGGG	BnaA06g11550D
GAAGCAGGGGGGATTACACAAGG	BnaA08g23240D
GGGGGGATTACACAAGGAATTGG	BnaA08g23240D
AAGGTGTCAGTGCCTGTTGATGG	BnaA08g23240D
CCCCGATACAACATAAGCTAAGG	BnaAnng19950D
ATCCTTAGCTTATGTTGTATCGG	BnaAnng19950D
TTCAATGTAACGTTCTCTTGAGG	BnaC05g13400D
AACAGCGTTAAAGGCCTCGATGG	BnaC05g13400D
GGGGGGATTACACAAGGAATTGG	BnaC08g17260D
>>AT1G17420	BnaA08g23120D	BnaA09g45010D	BnaC08g37760D	BnaC08g48320D
GACTGGATTGATTCCAGCTATGG	1	2	3	4	1
GATGTGGTCGGAAGTGAGAGCGG	1	2	3	4	1
GAAGTGAGAGCGGAGTGTTGTGG	1	2	3	4	1
TAGCTTTAAGCGACGGAACAAGG	BnaA08g23120D
TTTGGGACGTAACCTCCATACGG	BnaA08g23120D
GTTGAGAGCGGCGTGTTGAGCGG	BnaA08g23120D
GAGTGTATTAACGATGGCCTTGG	BnaA09g45010D
AAAGTCCTCAGCTAAAATGCTGG	BnaA09g45010D
GTACTCCGGATCAGACTCGTCGG	BnaA09g45010D
AAAGTCCTCAGCTAAAATGCTGG	BnaC08g37760D
ACTGATGGCCGCAACGACCCCGG	BnaC08g37760D
CGTTTGCAACAAACTCGGCATGG	BnaC08g48320D
CTCTCTCTGCCACCGAGCTTCGG	BnaC08g48320D
>>AT1G17560	BnaA04g15320D	BnaA06g11840D	BnaC04g38260D	BnaC05g13680D
GGAAAGAAAGGAGCAAGACTTGG	1	2	3	4	1
ACAAAGGACGTTCATTCAAATGG	1	2	3	4	1
CAAAGGACGTTCATTCAAATGGG	1	2	3	4	1
GGTCTTACCAATGCTTTCTCCGG	BnaA04g15320D
CAATCTCTAAGGGGAAAGAAAGG	BnaA04g15320D
CTTAATTCCCAAAATAACGATGG	BnaA06g11840D
TTTCTGAGACGCAGCTCGTGCGG	BnaA06g11840D
TTCTGAGACGCAGCTCGTGCGGG	BnaA06g11840D
CATCAAACCAGAGAAAGCATTGG	BnaC04g38260D
CAATCTCTAAGGGGAAAGAAAGG	BnaC04g38260D
TCCACTCATCATTCCAGTGGAGG	BnaC05g13680D
TAAAGCTGTCGCCATTCCAGTGG	BnaC05g13680D
>>AT1G17620	BnaA06g11860D	BnaA08g23020D	BnaC08g17460D
[truncated: 33,285 more rows]
[truncated: 12 more columns]
