# Supplementary material for: Genome-scale targeted mutagenesis inBrassica napususing a pooled CRISPR library
Source: HighWire-hosted journal article supplement (doi:10.1101/gr.277650.123), 2023-05-01
Supplement: Supplemental_Transcriptome_data_in_FPKM.xlsx [file Supplemental_Transcriptome_data_in_FPKM.xlsx]

## Sheet: Total
Gene_ID	H_10 DAF	H_17 DAF	H_24 DAF	H_30 DAF	H_36 DAF	H_42 DAF	L_10 DAF	L_17 DAF	L_24 DAF	L_30 DAF	L_36 DAF	L_42 DAF
BnaC07g40770D	5.83996	13.409	4685.73	19389.3	59962.3	37173.6	9.61179	3.39172	3037.98	13963.2	46738.7	29267.7
BnaA01g17200D	5.21932	33.9161	11899.1	32100.6	47050.6	41461.3	11.6662	10.3196	5843.44	21387.9	27635.9	24664.8
BnaA01g16180D	5.99882	30.1786	9386.11	33263.9	37735.5	37387.4	8.96883	12.6768	5059.65	18444.4	28137.9	25038.3
BnaC01g43250D	0.965672	16.376	6785.65	28930.7	41267.1	38509.9	8.18569	15.3608	5242.67	20281.7	28178.3	24962.5
BnaA01g08350D	3.8569	5.87929	2918.93	19803.1	36562.1	33046.3	3.52367	1.63864	1739.47	13763.7	39627.8	36097.9
BnaC03g08840D	3.57967	56.349	8085.91	23267.7	40986.4	32298.1	14.5004	43.2646	5994.57	19766.8	30020.5	22284.5
BnaC01g09900D	2.75399	10.6187	2708.78	14570.3	31753	23716.9	3.23517	6.39487	1492.44	10959.9	26698.6	23916.3
BnaA01g16230D	5.67712	6.55129	5021.13	18187.7	17665.2	17681.9	6.33834	1.98162	3360.18	20535.2	19280.8	15044.4
BnaA10g02240D	2.41213	1.81065	1555.8	10733.1	25525.8	25291.1	4.11166	0.152664	1365.37	9218.37	22122.3	20507.9
BnaA03g06940D	2.86248	11.9018	4721.53	17246.1	27772	19273.1	10.7304	6.15226	3175.18	12467.4	14178.7	9648.72
BnaC01g19310D	5.91474	8.73385	3962.28	16565.1	27179.1	18603	10.5705	4.83336	3313.65	10506.9	14582.2	9337.06
BnaC07g48660D	2.05575	1.91163	990.422	6473.69	18899.1	11327.9	3.3952	0.0786702	969.652	6224.77	22358.2	13308.4
BnaC05g02160D	1.52652	1.13539	1022.64	8633.52	19114.9	16254.7	1.96135	0.0523323	831.654	5994.9	15046.7	12904.7
BnaA01g16220D	1.64178	1.98385	2523.6	10883.3	16597.5	12127.7	4.24839	0.277089	1809.63	7533.32	11848.7	7604.2
BnaA08g14540D	1.68993	148.878	3681.4	6986.45	6999.86	12017	2.77153	157.051	2018.93	5897.88	9815.52	18686.9
BnaA03g48490D	2.12987	1.56984	394.39	3938.42	20305.2	13413.8	3.96211	0	275.123	3423.61	13065.4	8221.81
BnaA01g16200D	1.01033	1.0821	1760.59	8515.49	14612.1	8855.13	3.70891	0	1303.84	5860.28	11090.3	5208.23
BnaA04g15830D	4.64977	137.336	4101.48	5686.28	4821.35	5661.5	5.26476	165.196	4862.53	10516.3	8857.01	8086.2
BnaC01g19300D	15.3443	15.6303	4432.52	8153.42	10657.3	9157.21	21.714	10.2523	2080.96	3717.19	5451.29	4892.63
BnaC01g19330D	1.19287	1.73336	1496.93	7551.84	10361.5	7139.43	2.95008	0.206622	1292.16	5068.09	5147.37	3615.38
BnaA09g02110D	1.67619	1.65082	810.092	3886.73	4895.46	9297.46	2.16041	1.26816	459.179	2881.55	5457.86	11911.8
BnaA06g36310D	0.424697	0.786191	407.418	3020.73	10496.7	6238.91	1.91497	0.0776507	308.027	2334.85	9989.28	5557.69
BnaA03g47170D	0.949927	2.37395	699.502	2485.12	4228.83	6883.33	1.26807	2.7355	433.719	2129.44	5607.32	9564.06
BnaC02g23400D	0	0	0.472633	1.29461	376.732	6563.41	0.144027	0	0	147.415	2487.48	18899.2
BnaC04g39100D	1.93411	78.8368	2087.38	2920.13	2310.54	2804.29	3.17474	94.4975	2609.19	4945.11	4250.3	4685.52
BnaA07g30010D	10782.1	1136.13	72.8065	79.1157	8.48746	14.2256	11723	1589.28	251.438	172.336	14.1664	0.796067
BnaA01g11800D	2846.07	3502.23	1538.02	2212.03	1127.25	1294.06	3666.64	4155.27	2117.8	1802.11	1001.65	566.479
BnaA02g29000D	0.346799	1.43071	608.548	1874.04	3229.13	5137.56	0.493808	1.01453	393.097	1765.49	3661	6711.85
BnaA06g34320D	12.3247	39.0673	2060.26	2641.45	2805.81	3221.13	19.4437	20.588	941.862	2338.24	4191.49	4708.31
BnaC07g39370D	0.642598	28.6422	761.502	1940.81	3778.64	4755.11	1.99636	19.4822	393.669	1469.47	3652.34	5873.15
BnaA06g40240D	329.348	8534.36	588.985	700.929	192.898	235.847	818.73	6578.22	2725.08	916.028	97.5543	11.214
BnaA05g18870D	6859.6	4598.48	131.6	143.411	24.8129	82.4617	4627.27	3790.23	920.151	459.906	45.014	12.2666
BnaC01g13370D	2585.34	3471.31	1253.78	1860.69	926.819	1060.56	3041.02	3526.03	1410.73	1299.6	603.062	452.747
BnaC09g13470D	2711.33	3280.34	1733.2	1227.86	1285.76	550.566	2793.21	2965.25	1734.18	1362.91	1290.18	232.252
BnaA08g13680D	0.132682	0.400007	51.3027	889.027	3933.72	5026.76	0.259774	0.0485186	47.6112	891.459	4472.15	5851.61
BnaC01g17050D	1.14991	14.4751	648.203	2020.27	2890.77	5403.04	1.09158	15.6985	366.219	1321.14	2454.95	5402.04
BnaA01g14480D	0.894376	30.714	610.592	1843.93	2779.45	4775.64	0.955129	20.8845	369.308	1250.63	3011.47	5756.79
BnaC08g11970D	2.85242	35.3028	1265.12	2069.69	1881.54	3754.24	3.11099	42.144	822.499	1898.76	3133.13	5441.27
BnaC05g31880D	4697.83	5265.68	117.036	113.845	22.6486	71.4572	3303.11	4546.07	1110.94	598.693	42.296	10.9302
BnaA02g22500D	0.188754	11.1864	234.247	1037.36	4543.45	2653.17	0.277167	19.2832	152.506	1327.63	5479.01	3476.93
Novel01543	2050.63	3021.11	1639.38	1026.83	998.579	497.57	2172.17	2834.42	1931.17	1390.24	1061.98	223.426
BnaC08g12450D	0.541694	1.37523	971.846	2202.42	4727.42	1586.38	0.38566	0.297126	395.1	2004.88	5718.15	775.725
BnaA04g22070D	5.27693	13.6613	545.374	1022.57	3728.14	3570.23	4.74558	6.49984	200.068	832.01	3712.72	3765.57
BnaC02g37030D	0.455173	8.12514	498.613	1358.67	1798.41	3639.09	0.972185	13.7942	365.861	1269.29	2700.3	5618.68
BnaC04g30640D	28.8299	2291.01	3533	1556.04	577.667	537.801	22.6307	2058.83	3128.21	2359.36	493.341	100.723
BnaA09g33890D	1590.85	2758.53	1441.05	1055.59	1037.34	849.406	1748.37	2573	1538.4	918.704	692.985	326.863
BnaC04g32530D	0.332474	1.08524	304.546	996.101	2454.81	3864.7	0.913008	0.416838	165.859	723.109	2856.91	4798.48
BnaCnng40400D	2413.43	2462.15	2349.93	1363.94	649.922	601.985	2701.23	1367.22	674.838	690.92	405.508	352.098
BnaAnng35580D	3259.6	1372.76	326.351	890.546	1047.57	531.076	3041.02	1324.21	237.41	1510.39	1801.05	630.712
BnaC09g14950D	0.0551725	0.262631	0.580049	69.0851	2329.33	3925.82	0.0589203	0	0.571705	190.262	3388.93	5796.61
BnaC07g21510D	3.83055	62.1309	1551.88	1366.7	2123.41	2099.12	4.8483	50.5822	741.583	1163.97	2769.26	2576.94
BnaA02g17520D	0	0.128397	0.787721	0	59.57	3272.25	0.144027	0	0	7.98566	687.851	9996.19
BnaC04g45790D	7.22106	14.807	1253.83	1670.01	2089.33	2592.32	8.5025	7.31232	446.395	1112.23	1967.09	2611.51
BnaC04g49020D	0.66207	5.98798	799.566	1411.83	2322.83	2164.76	1.17841	3.87364	449.868	1507.33	2230.23	1620.29
BnaA09g19380D	4359.69	1725.24	258.019	121.197	11.7032	13.3121	3591.17	1619.82	330.461	134.684	15.9134	3.46053
BnaA03g54880D	1665.33	2316.8	1126.76	700.959	288.788	865.814	1398.94	1305.08	329.81	319.267	284.13	1565.93
BnaC08g49360D	2174.3	1019.65	444.891	1015.83	657.079	586.781	1928.54	923.916	284.342	1464.01	961.459	600.169
BnaC02g32980D	26.9228	1222.12	2297.82	1501.16	326.905	295.865	27.6226	1156.73	2543.34	2122.3	330.15	38.8995
BnaA07g21570D	0	0	0	0.575382	443.581	3212.65	0	0	0.155278	71.2321	1342.99	6131.23
BnaC03g61870D	0.566998	18.4432	599.042	1206.74	1348.49	1715.94	0.888086	34.9363	815.689	1438.33	2166.43	1835.56
BnaA02g01450D	3.29924	376.361	960.85	1518.37	1022.07	1179.79	5.40248	347.659	1523.4	2255.3	1195.78	470.668
BnaA03g11410D	4644.52	864.775	200.094	112.204	246.433	64.4087	3184.99	580.989	325.758	235.32	177.258	30.5371
BnaA10g29580D	5187.47	1011.16	56.9463	52.5773	5.86601	11.5258	3425.2	607.893	158.005	47.2192	1.25261	1.39312
BnaC06g14670D	0	0.675336	257.542	709.682	1930.88	2605.23	0.454528	0	153.217	447.243	1622.86	2792.17
BnaA05g29430D	3800.24	1426.5	155.412	83.9531	13.9667	11.3805	3684.55	1171.55	75.9143	59.8326	15.0114	3.88083
BnaA02g33370D	1089.98	2394.41	778.679	676.479	305.348	236.154	1101.82	1760.53	911.496	794.523	260.829	27.421
BnaA01g32660D	1774.65	1242.49	1901.81	1070.62	701.01	460.812	845.989	471.052	447.719	445.275	388.084	291.566
BnaA01g30830D	3870.97	1105.64	70.6948	39.3506	29.5285	11.4384	3303.97	1185.87	151.74	64.8029	56.8668	5.77759
BnaA09g19810D	739.58	1062.24	1358.81	780.498	423.181	599.446	781.258	1097.79	1342.77	728.324	359.189	474.311
BnaA04g20150D	517.512	423.536	2065.39	2212.83	275.139	717.704	588.273	391.942	1221.38	996.228	168.219	130.038
BnaC02g16660D	6.27558	594.58	1313.31	1768.05	466.977	487.862	10.4251	768.001	2710.05	1166.79	263.196	145.121
BnaA03g27890D	904.026	1229.97	842.472	793.62	294.01	689.755	709.218	975.912	1100.65	1107.44	382.767	523.182
BnaAnng26750D	1490.07	937.231	913.954	901.757	491.941	753.604	1252.63	708.636	524.767	649.105	383.28	535.527
BnaC01g00910D	1266.41	866.403	889.643	872.076	506.697	653.44	1420.21	755.085	597.019	648.822	437.082	547.241
BnaUnng00730D	87.8773	617.889	204.985	502.784	573.464	1547.78	72.5816	791.936	827.091	1646.16	916.887	1619.76
BnaC03g44340D	1915.37	793.989	435.738	614.252	318.62	628.974	1688.44	711.43	426.325	863.799	319.415	582.672
BnaC03g14230D	3185.7	608.827	322.217	277.771	195.895	149.564	3078.13	522.386	407.763	362.877	134.168	42.908
BnaC07g18750D	41.569	2538.67	225.545	216.298	70.728	92.0012	246.483	2834.93	1931.27	980.525	43.8574	4.30895
BnaC03g60160D	127.933	314.29	469.578	377.764	1179.78	2058.41	152.875	373.862	314.438	263.895	1257.79	2198.52
BnaC09g21810D	620	779.198	918.798	875.118	529.917	626.938	851.291	1012.66	1302.88	780.011	379.766	352.158
BnaC02g18030D	0.578764	77.898	498.358	1188.22	877.203	1302.63	1.39068	93.9679	1217.1	2013.17	965.438	640.65
BnaCnng38780D	406.715	765.516	1394.94	1135.52	568.321	631.555	523.076	822.349	999.751	736.13	451.185	384.306
BnaAnng00330D	131.623	482.34	1362.95	1075.49	572.734	963.568	160.197	536.653	760.633	1063.81	717.89	976.406
BnaC01g12930D	1144.74	1481.4	451.729	381.75	180.603	233.132	1158.91	1666.87	1420.54	531.049	99.7586	24.1353
BnaA02g13680D	1.88098	37.9503	358.409	1084.21	1023.27	1262.04	2.78135	51.6665	981.462	2007.08	1012.93	583.892
BnaC01g03590D	1017.08	1311.56	1192.83	641.977	398.406	366.505	1085.7	952.908	567.297	386.982	276.426	205.119
BnaA04g24790D	2.11299	15.8316	831.544	2577.3	371.668	993.585	2.41448	7.41762	1066.29	2148.78	248.4	104.724
BnaC03g20530D	1131.62	1577.78	425.279	649.667	168.823	271.645	1104.45	1411.37	794.739	707.849	100.915	18.9565
BnaA10g27170D	1845.24	1184.72	1178.75	560.71	342.713	229.009	1720.26	470.338	229.656	248.674	197.668	105.258
BnaA06g06160D	72.3965	960.192	1645.51	895.12	426.48	502.245	83.5056	905.797	1253.94	972.811	352.293	139.947
BnaA09g14400D	0	0.105052	0.451149	45.841	1564.15	2539.3	0.176761	0	0.254091	36.9809	1332.85	2683.62
BnaA09g47450D	1169.42	1200.34	502.509	644.766	840.209	648.754	758.134	706.964	411.811	455.79	492.24	353.092
BnaA08g15380D	0.196832	27.434	588.481	953.89	1154.83	1213.53	0.630606	34.8294	450.977	861.356	1352.36	1314.06
BnaA05g14890D	3525.71	142.958	10.7997	10.5903	1.34713	1.44088	4091.61	140.398	5.32217	16.7908	0.316915	0.10574
BnaA08g16920D	176.049	377.352	377.374	303.073	938.979	1612.67	282.822	360.7	226.468	249.538	1012.96	1988.89
BnaA09g50780D	0.263762	0.92074	205.641	999.684	1957.65	1663.4	0.610305	0.530483	101.329	553.861	1205.37	1045.72
BnaAnng33460D	565.039	851.23	824.852	640.721	448.195	482.726	548.868	914.329	949.662	642.526	379.308	448.239
BnaAnng05720D	0.132682	0.126318	29.552	273.503	1530.56	2001.84	0.0944633	0	25.9698	242.499	1332.15	2184.68
BnaA03g15610D	677.599	656.833	226.421	890.858	538.387	1118.24	910.607	577.875	350.67	744.161	298.481	569.824
BnaC08g24680D	949.75	1138.43	730.239	463.451	369.965	266.54	1092.79	1044.76	661.915	374.78	226.342	102.966
BnaA02g27980D	137.543	268.258	718.299	1028.9	896.04	1039.76	190.105	322.717	518.274	661.249	751.98	834.245
BnaA02g05320D	934.89	1180.56	844.784	512.199	280.686	358.519	870.767	830.098	529.094	471.502	220.904	200.683
BnaA03g20280D	0	0.115558	0	18.7718	663.144	2225.15	0.388874	0	0.559001	91.4199	1095.74	2993.16
BnaA01g24730D	664.012	619.794	550.796	535.339	564.731	417.053	869.606	773.783	689.214	567.295	542.27	282.991
BnaC05g43050D	238.55	841.058	278.802	353.851	364.255	370.092	512.172	1195.67	750.276	1037.19	824.3	305.759
BnaA06g08510D	756.678	667.894	854.793	827.84	309.912	434.081	647.384	577.115	614.169	613.057	275.286	239.459
BnaA01g27710D	477.496	410.284	495.039	613.875	960.919	593.178	521.183	337.824	282.808	482.871	972.636	657.552
BnaC03g76140D	403.432	676.133	767	647.335	463.544	476.483	520.503	744.964	646.133	526.797	433.46	467.44
BnaC05g05630D	534.321	891.006	691.034	543.012	454.462	329.601	682.02	962.803	713.129	445.364	306.649	200.974
BnaA04g12350D	1150.38	496.089	255.297	391.696	670.725	451.06	966.032	438.829	113.789	439.013	884.652	412.953
BnaC06g12930D	0.326094	23.1805	469.43	777.462	1152.28	1092.87	0.348245	22.2987	261.374	499.45	1210.04	1152.14
BnaC02g04530D	5.57206	316.403	341.38	590.16	770.223	1090.88	4.7761	249.816	988.39	1045.84	745.287	508.329
BnaA09g08780D	1368	1155.02	796.232	544.91	380.574	218.296	986.542	493.786	200.875	215.036	177.76	103.48
BnaA06g38230D	15.8897	931.652	1527.14	447.89	252.353	280.108	21.6192	982.108	1305.25	665.746	181.808	28.3689
BnaA10g05760D	1.01959	2.56538	224.425	663.902	1355.86	1201.12	0.311099	3.35554	133.154	460.549	1275.47	1310.87
BnaC04g30870D	345.792	329.32	1709.77	1260.47	186.311	383.025	294.732	236.126	744.423	851.552	150.374	133.004
BnaA01g02340D	813.882	1122.68	1162.88	486.264	313.967	265.003	678.866	644.578	390.048	304.201	198.679	157.446
BnaA03g48460D	0.376695	0.53794	312.94	1038.52	1257.57	1693.64	0.402283	0.137748	153.966	614.348	627.487	797.184
BnaC05g43490D	1621.9	485.213	559.597	431.968	348.21	445.63	1530.15	217.933	125.62	180.476	177.186	340.402
BnaC02g03550D	296.418	587.23	1064.77	894.749	481.461	845.499	234.605	312.609	358.152	431.489	295.059	609.574
BnaA03g08920D	382.699	578.064	767.316	797.286	358.89	411.346	508.235	720.238	715.698	554.737	299.241	284.362
BnaC03g32430D	0.673984	2.7003	522.975	1042.87	853.837	1029.06	0.749757	3.63528	268.525	748.421	902.335	994.98
BnaA07g30790D	2899.03	539.724	36.7852	25.9879	16.4275	8.13584	2203.14	423.82	129.439	59.7904	23.382	2.85892
BnaC03g39720D	405.034	280.189	428.969	428.692	1299.9	552.9	452.912	236.278	237.484	350.518	1063.36	618.38
BnaC02g10060D	612.436	2222.39	641.928	270.065	107.651	118.163	373.631	1224.62	503.55	226.047	35.9876	2.98525
BnaC03g28630D	0	0.203925	4.87924	160.037	993.3	1632.22	0	0	9.37148	189.613	1173.47	2147.48
BnaC09g08130D	0	0.358627	2.55222	13.4997	251.362	1699.08	0.0804567	0.247947	4.94426	79.7619	595.876	3635.79
BnaC01g35230D	379.243	332.006	432.593	547.413	886.8	595.344	499.576	371.01	309.749	487.081	784.012	640.142
BnaA08g04880D	1661.11	1322.87	97.924	173.797	97.7228	60.4231	1237.79	1055	245.709	173.862	64.3366	7.04137
BnaCnng30140D	2.21436	5.22017	626.032	1963.86	295.618	711.022	1.6666	2.01277	612.85	1557.16	211.981	76.7667
BnaC09g03710D	0	0.423263	305.858	886.97	980.502	1311.47	0.203481	0.0348375	159.23	657.181	873.394	880.872
BnaA03g07060D	489.061	586.372	889.022	703.607	359.839	460.385	482.204	428.737	393.753	482.445	288.128	474.987
BnaA01g15860D	0.177629	3.08623	137.934	512.855	990.949	1324.44	0.331966	0.876884	73.3688	374.167	1020.15	1596.85
BnaCnng34690D	9.02238	4.16849	30.5336	256.38	1207.62	1400.93	1.74757	0.727779	22.1507	222.02	1207.42	1638.4
BnaC08g40620D	2154.46	520.945	179.548	135.39	187.592	85.8331	1628.84	382.532	341.983	252.526	56.6735	16.3831
BnaC01g18950D	0.0888143	0.549603	100.74	442.33	600.664	1088.8	0.0474237	1.46147	93.1554	574.214	1058.26	1978.59
BnaA01g11480D	851.257	960.039	163.247	126.261	84.486	74.6687	880.024	1268.86	898.707	402.399	65.3399	11.2783
BnaC03g08960D	435.109	545.267	724.691	619.431	338.966	435.756	512.837	471.293	438.673	471.62	308.958	462.022
BnaC03g49830D	593.482	640.393	651.267	506.891	465.98	276.355	667.452	559.858	410.606	344.485	373.442	219.743
BnaA07g33890D	870.972	678.894	414.735	315.082	224.71	250.365	1019.74	611.477	410.36	368.854	230.668	250.627
BnaA01g31340D	0.803247	30.1299	554.075	1356.28	990.144	451.659	0.514686	16.7425	288.358	991.946	738.874	209.869
BnaA07g33590D	608.604	515.543	478.24	536.151	349.071	300.893	727.217	647.258	416.562	378.134	394.503	249.122
BnaA03g38820D	6.99378	652.79	1371.72	732.503	100.719	279.804	5.06153	305.88	1209.44	835.483	27.7473	0.943487
BnaC03g32950D	1.09242	2.37718	230.793	450.08	336.232	1019.5	1.16662	1.54081	87.6832	411.02	762.38	2195.87
BnaC03g33640D	1485.07	289.081	174.701	410.756	482.161	495.885	1220.11	177.82	176.617	267.026	162.859	141.509
BnaA07g37520D	620.201	546.911	761.922	510.724	242.021	319.196	727.661	551.827	543.684	334.804	157.216	133.219
BnaC06g42830D	525.834	422.115	803.037	577.766	290.985	372.57	584.329	400.04	430.131	447.756	249.108	318.604
BnaA10g23630D	0.676258	3.16958	381.799	1074.99	789.756	978.883	0.222214	3.93763	170.994	534.35	709.731	767.568
BnaUnng05060D	761.77	298.219	138.22	263.581	457.178	198.823	1028.19	448.288	134.696	450.455	999.755	232.877
BnaA08g00390D	478.024	622.056	755.302	591.802	299.852	321.884	483.013	530.597	386.442	416.755	257.284	257.381
BnaA02g24080D	6.81593	782.858	1022.2	669.911	150.873	118.561	5.68354	766.469	948.258	735.848	137.608	15.8125
BnaC03g70690D	374.941	480.432	755.816	653.031	335.062	355.01	411.763	524.083	452.115	457.649	252.576	286.477
BnaA05g29010D	1200.17	353.093	739.355	363.929	197.725	278.728	1173.1	223.851	230.277	191.177	127.976	191.253
BnaA09g22540D	243.765	281.597	1128.75	990.266	110.817	277.393	256.268	325.168	928.16	598.541	70.5171	33.2225
BnaA10g03880D	218.415	677.659	344.311	611.92	429.931	491.224	267.417	620.456	582.55	575.124	251.351	169.32
BnaA03g02890D	894.746	856.537	951.977	287.117	107.789	165.571	718.516	554.548	374.28	215.159	75.4787	35.1946
BnaC03g78280D	1783.71	548.629	198.847	205.981	108.935	97.5614	1245.01	420.141	288.041	232.403	80.9843	25.8732
BnaAnng12230D	0	0	62.0022	329.408	601.054	2024.01	0.19021	0	20.3701	144.765	318.537	1718.5
BnaA04g08640D	283.908	255.033	1429.59	1008.49	156.89	367.975	219.992	154.542	576.078	546.543	92.0108	111.572
BnaC01g31610D	694.422	606.724	390.593	340.412	472.371	325.25	804.969	462.845	311.208	286.532	262.859	237.207
BnaC05g03600D	0.180565	0.128928	19.9853	134.185	597.068	1243.01	0.241038	0	15.592	220.513	839.396	2080.88
BnaA02g15890D	2632.72	189.012	4.43864	4.55928	0.523167	0.589554	2001.01	171.425	34.9983	8.9995	0.968199	1.93825
BnaA09g29970D	579.073	454.259	672.444	547.521	336.206	294.407	775.21	394.459	362.509	286.363	175.884	165.285
BnaA09g43150D	0.118741	0	5.82571	104.547	699.932	1349.64	0.317017	0	10.1851	127.329	741.035	1950.12
BnaA02g09460D	268.61	426.081	515.912	530.043	310.929	461.496	308.821	451.458	385.411	494.887	432.901	383.163
BnaA05g23130D	116.659	355.575	284.525	627.31	529.049	922.173	161.359	325.296	386.228	575.394	298.472	385.578
BnaC09g27370D	0.0728277	0	67.974	335.097	1166.79	922.243	0.233324	0	47.7107	243.901	1105.49	1060.78
BnaC05g09880D	522.474	484.717	665.422	560.04	203.978	268.373	446.633	451.745	496.141	448.683	198.976	147.119
BnaC05g49410D	0.245487	338.765	562.635	130.261	128.981	196.845	3.01487	1129.06	1522.16	713.703	137.865	22.6656
BnaA01g33660D	422.816	696.721	775.553	500.912	189.042	242.767	319.9	475.018	565.51	353.189	153.569	138.53
BnaA01g04810D	52.9333	973.389	820.444	216.358	69.2622	66.145	48.3721	1201.23	945.972	352.659	78.3021	3.53376
BnaA04g25150D	0.22524	3.10933	404.276	614.646	972.304	570.068	0.721622	5.93027	284.744	534.809	1079.22	350.549
BnaA05g14090D	1634.56	736.279	179.637	49.2948	3.54815	9.38751	1441.38	583.84	119.648	27.5321	8.42209	0
BnaC09g44830D	509.066	920.336	583.476	299.354	221.775	185.038	435.778	585.008	408.092	341.133	199.561	103.905
BnaC07g20300D	86.7613	94.5471	426.283	476.844	673.939	331.485	98.3433	96.3679	386.161	806.891	887.062	378.099
BnaC09g17310D	511.938	384.387	547.8	404.044	417.753	269.882	531.566	340.58	424.897	318.829	366.085	222.629
BnaA03g24060D	0.109242	0	0.638054	41.1298	548.698	1210.21	0.349987	0	2.26395	80.7255	846.428	2004.98
BnaA07g25400D	686.551	602.926	256.756	249.711	216.197	201.025	766.528	614.921	339.112	286.447	260.53	220.037
BnaC05g07900D	7.90564	449.124	817.045	496.926	232.16	275.477	11.2569	514.159	820.462	631.746	240.51	102.602
BnaC08g02460D	404.641	461.146	240.372	400.471	378.281	335.074	436.991	454.415	598.445	515.519	262.809	110.708
BnaA08g16740D	569.621	587.947	212.144	398.292	271.877	407.232	504.832	573.941	307.809	389.292	188.531	183.922
BnaC06g22030D	604.638	484.429	474.343	429.725	291.084	266.11	612.016	365.042	287.049	317.121	229.571	200.169
BnaC08g38960D	207.789	746.514	325.743	351.998	153.134	217.098	204.343	764.837	482.314	574.801	245.892	285.897
BnaA02g34980D	683.18	732.333	391.863	305.09	237.325	177.737	649.18	525.272	208.593	272.667	237.417	116.765
BnaA05g08680D	0	1.78589	2.9647	55.3151	206.26	1213.25	0.235681	0.121051	1.65159	75.6605	366.982	2583.71
BnaC06g03040D	292.603	535.113	608.797	392.146	214.457	199.968	329.37	592.8	623.131	427.43	199.109	86.8367
BnaC06g09330D	0.0474964	0.0791318	43.7206	146.34	293.51	867.557	0.0507227	0.0260524	57.337	216.269	590.408	2247.71
BnaA09g16230D	597.834	351.677	355.355	345.316	325.372	320.294	507.292	316.032	288.167	291.495	350.371	388.455
BnaC03g45710D	1.156	615.647	1007.18	606.247	34.4432	249.026	0.802438	305.816	878.363	710.291	18.7928	0.353808
BnaC09g41380D	3.57236	1081.18	751.997	223.366	151.237	112.655	4.97611	1082.37	660.23	217.963	106.066	12.7824
BnaC04g37460D	597.584	585.19	368.176	294.863	289.861	200.845	540.92	470.583	284.302	283.328	303.933	186.816
BnaA02g24090D	7.74962	535.476	845.94	542.442	116.832	95.3817	5.78325	627.679	925.468	579.169	98.6859	12.669
BnaA06g35460D	210.538	331.173	463.512	432.357	479.027	272.539	162.845	249.784	410.692	592.953	559.843	219.951
BnaA07g07560D	235.196	176.027	877.705	1229.32	32.7311	291.484	239.332	134.597	523.093	568.928	17.0753	19.5868
BnaAnng10080D	1.33376	0.967459	97.4887	323.126	950.805	1112.41	1.42436	0.243862	73.5638	208.718	756.808	804.25
BnaA06g04440D	365.663	560.662	424.188	292.071	325.774	216.25	469.382	600.166	391.431	253.909	233.192	168.093
BnaA07g10030D	469.739	503.954	573.505	414.024	254.442	226.171	600.98	420.607	313.949	239.896	154.691	119.456
BnaA02g06370D	253.7	420.88	555.776	504.409	256.336	317.784	333.779	483.358	449.272	307.256	192.709	192.426
BnaA05g36060D	220.95	263.024	604.573	502.267	376.9	343.805	221.156	202.441	269.943	437.486	413.525	377.969
BnaA09g52180D	464.505	619.955	207.696	203.625	136.048	221.866	475.293	514.081	429.492	438.337	234.781	284.832
BnaC06g14270D	343.396	566.419	436.258	400.208	258.991	223.566	429.31	541.52	429.317	312.573	196.106	90.0288
BnaA01g05410D	838.705	378.115	216.741	218.398	254.276	276.135	539.45	256.125	234.683	379.278	339.38	283.375
BnaA03g02870D	235.35	294.824	532.801	587.981	428.225	439.932	237.944	280.188	299.898	274.984	279.604	321.331
BnaC05g40970D	212.771	290.276	318.693	473.548	537.939	385.817	252.158	298.114	355.185	386.835	497.55	192.014
BnaAnng40150D	1297.02	483.046	111.056	47.0783	1.13824	0.366479	1689.55	472.4	59.6582	24.3002	14.5949	0
BnaA05g26900D	275.489	351.744	285.676	361.044	518.122	344.885	291.859	339.95	292.825	356.016	526.812	212.265
BnaA10g03690D	0.135423	0	3.90215	78.142	457.397	1204.29	0.096415	0	5.24929	99.8591	580.639	1722.26
BnaC08g19430D	595.741	413.87	301.896	364.787	145.301	337.507	618.869	348.688	259.476	367.015	125.68	269.998
BnaAnng21140D	312.507	471.346	481.746	433.327	200.725	198.603	350.936	495.054	475.664	409.253	205.259	112.823
BnaC05g02530D	303.908	504.83	557.311	448.285	213.267	248.106	284.859	427.9	412.112	359.704	188.748	184.946
BnaA02g07120D	755.779	802.821	113.842	33.3192	49.8202	7.49354	593.749	1225.11	351.729	180.547	2.63707	0.391051
BnaA08g29110D	1870.3	326.821	28.2911	25.1716	1.24869	1.1513	1517.38	278.46	40.343	20.9917	2.52097	0
BnaA10g20530D	557.989	438.541	500.935	462.518	153.478	237.029	615.565	353.296	296.065	259.623	98.7895	132.319
BnaA09g13230D	24.4118	19.2985	943.675	863.977	268.98	277.607	43.801	22.8866	763.323	610.644	213.24	24.5028
BnaA09g26570D	107.733	123.793	1114.02	1215.8	69.2787	300.085	99.2934	89.031	452.509	458.145	33.0705	12.8084
BnaCnng23020D	1723.04	226.507	23.4475	14.475	5.01984	3.6187	1733.33	283.28	25.7723	13.0558	4.09851	2.32471
BnaC08g15730D	522.777	529.966	166.293	191.323	156.7	221.193	517.357	572.138	456.328	337.936	190.864	175.058
BnaC03g32930D	314.121	460.551	279.299	248.858	94.9006	232.818	328.635	525.265	535.849	562.139	191.594	255.703
BnaCnng68070D	11.6474	13.118	830.582	939.711	377.337	276.155	19.9179	18.1223	683.217	529.957	269.046	36.3473
BnaC04g39940D	389.041	422.918	551.773	440.802	205.878	264.983	458.746	445.035	385.359	239.205	107.464	90.2381
BnaAnng27610D	659.581	373.008	435.7	393.801	206.075	128.874	812.126	361.134	174.5	198.074	205.563	49.1689
BnaC05g07890D	16.9133	376.505	698.054	506.124	225.933	284.992	16.3736	366.303	631.744	543.401	215.556	94.732
BnaC01g09180D	470.649	536.791	317.674	277.164	266.272	222.4	419.365	431.881	332.732	296.174	223.445	174.857
BnaA04g24120D	331.763	385.171	495.1	378.333	221.648	282.38	424.478	411.982	353.736	253.349	165.368	232.136
BnaC09g09060D	522.645	518.558	494.418	274.826	164.682	173.754	724.662	399.307	211.77	200.896	154.715	88.706
BnaC07g27090D	0.29744	6.5516	792.561	865.08	139.346	206.031	0.317645	8.79525	688.961	898.497	238.243	82.056
BnaA04g01880D	505.491	341.024	253.615	318.827	259.085	253.652	535.259	342.51	239.764	321.158	276.411	279.715
BnaC02g04020D	528.663	597.853	496.329	338.952	225.342	207.505	416.802	302.144	214.008	258.735	179.161	144.04
Novel00814	1920.14	132.492	8.73941	3.24829	2.55242	5.75261	1694.92	119.332	9.45219	5.88035	1.75449	0.337726
BnaC08g15340D	312.539	423.531	687.741	318.309	160.097	151.754	336.004	371.337	503.546	411.958	165.909	49.7175
BnaC08g41720D	279.74	271.02	131.739	137.796	253.378	126.825	519.987	562.756	416.125	378.484	575.403	229.581
BnaAnng00160D	148.273	153.764	743.909	894.616	149.491	253.68	202.782	209.93	569.132	428.576	81.5354	44.425
BnaC08g43570D	0.171072	1.6752	102.545	350.118	428.822	413.648	0.49588	7.80172	133.879	460.949	1029.88	923.509
BnaA06g08050D	69.5863	377.292	309.807	429.219	225.077	416.198	103.007	419.027	490.414	513.582	216.25	253.789
BnaC01g00280D	776.445	240.652	104.754	144.316	220.856	234.721	698.275	232.552	114.232	295.417	344.106	413.915
BnaC04g10780D	236.322	314.693	818.43	602.124	62.4626	213.909	252.2	312.978	557.65	351.764	36.4888	31.2225
BnaA10g02700D	0	0.0559149	31.4911	245.746	477.885	1075.67	0.188165	0	18.5282	157.119	403.348	1356.15
BnaC07g13150D	432.708	436.014	487.625	315.281	194.463	195.467	554.244	376.788	314.011	203.48	132.951	109.844
BnaA03g34250D	382.346	316.559	289.427	254.678	465.365	277.854	399.62	280.243	171.769	205.228	408.74	286.141
BnaC05g36570D	42.7157	207.367	290.276	392.441	376.407	530.49	81.6635	288.156	482.206	481.301	286.583	276.486
BnaA08g10860D	137.327	308.834	422.564	411.025	246.204	323.847	176.276	294.503	523.439	473.247	230.464	157.215
BnaA09g49150D	357.955	521.354	595.701	319.713	252.067	173.939	321.424	369.44	327.341	196.059	156.168	102.899
BnaAnng40060D	0.085345	0.243754	131.2	237.49	551.349	753.518	0.364569	0.374503	58.3675	215.276	635.524	1103.78
BnaA06g37700D	228.317	482.352	503.03	355.978	226.97	173.21	233.816	443.145	498.304	304.143	179.21	50.1399
BnaC02g00690D	233.049	418.093	418.953	432.652	259.25	255.068	271.322	352.921	402.907	302.37	186.484	144.538
BnaA09g01080D	313.473	242.304	729.748	524.085	126.783	139.908	344.038	214.047	490.939	360.173	126.606	55.0605
BnaC03g71530D	320.662	399.959	681.398	365.415	177.381	177.796	338.421	357.973	319.642	266.208	143.882	110.297
BnaC03g27900D	12.5628	313.074	247.211	319.995	407.111	409.579	22.0362	275.834	582.094	507.014	328.4	185.842
BnaC04g48580D	591.515	456.404	406.608	256.21	178.846	146.445	391.371	239.429	260.156	393.55	161.74	123.885
BnaC04g15710D	0.046191	1.6051	269.332	601.443	453.559	572.461	0.147986	2.68565	241.977	431.891	463.003	548.152
BnaC09g48550D	0.469136	5.74243	75.7053	218.09	330.054	881.798	0.214716	2.86736	43.5197	202.703	434.032	1390.52
BnaA03g27900D	251.226	362.794	385.772	379.068	124.796	254.805	306.831	408.791	435.714	361.178	129.447	158.778
BnaA02g12330D	354.399	303.519	333.197	313.732	256.824	266.12	397.009	240.564	219.373	268.101	300.284	303.785
BnaA07g29460D	849.165	104.775	134.607	348.357	267.441	262.752	742.428	122.68	86.0676	200.538	206.95	230.145
BnaC08g15900D	315.717	317.219	432.44	388.997	181.525	217.683	330.188	332.342	394.556	336.98	173.044	127.853
BnaA08g24270D	223.975	328.078	443.328	438.956	183.903	237.622	222.469	340.713	423.163	386.823	188.152	130.998
BnaA04g01280D	534.613	317.023	374.773	293.945	195.164	183.889	627.008	325.883	237.097	186.108	134.686	129.047
BnaC04g08360D	154.924	363.923	221.613	296.241	207.164	376.156	205.843	516.694	406.684	358.148	185.413	236.875
BnaC01g20930D	2.1227	1098.33	522.116	104.863	136.239	54.6888	3.26212	1072.94	367.132	70.5698	83.9029	3.85583
BnaC09g44450D	281.784	547.865	244.023	284.277	217.14	172.338	290.082	505.669	349.352	347.87	188.105	73.2283
BnaC04g04640D	406.44	436.083	330.988	243.991	124.521	182.844	427.138	414.808	447.225	266.083	102.265	106.712
BnaA07g13340D	453.353	364.827	550.406	313.466	154.105	163.787	435.129	269.432	274.83	249.203	133.123	120.639
BnaC09g46260D	902.463	425.6	516.514	179.41	41.122	70.3	690.572	275.052	211.253	137.783	20.1066	8.43986
BnaA08g16610D	468.225	289.138	234.158	155.26	77.7786	204.948	427.644	340.825	242.913	428.628	194.179	413.169
BnaC06g38520D	838.989	424.841	251.532	196.321	158.239	162.145	644.875	262.856	161.689	159.372	101.617	111.987
BnaA07g20570D	602.934	290.68	428.082	336.985	183.86	141.195	562.868	218.407	237.357	267.815	131.364	60.5303
BnaA02g06690D	609.334	368.753	558.833	224.35	51.1194	104.201	645.792	349.63	324.905	174.082	32.0578	18.6248
BnaC06g06760D	1699.65	127.05	4.51955	6.67533	0.156678	0.635612	1464.41	146.961	4.29077	3.47002	0.405938	2.29284
BnaA03g27410D	0.504839	0.921197	254.779	479.296	401.363	604.931	0.733819	1.55378	140.936	377.641	486.278	682.875
BnaA05g20420D	1297.68	365.265	50.9039	28.2072	11.6522	6.13638	1151.95	393.282	67.3684	42.6184	11.4559	2.66743
BnaA08g30590D	106.71	119.095	81.3908	97.9009	74.1047	66.8065	502.074	640.126	680.106	500.906	251.879	301.185
BnaA08g31740D	192.632	443.752	255.063	356.239	210.687	225.967	247.853	456.065	459.001	344.191	139.905	67.3196
BnaC01g35900D	0	0.0458158	12.8735	30.8995	257.036	1040.46	0.051393	0	5.92861	41.0899	321.815	1687.45
BnaC03g71690D	77.767	254.444	362.364	445.179	251.141	371.349	115.392	196.136	280.441	415.514	352.328	270.789
BnaC04g16650D	393.27	385.801	610.978	297.062	125.979	154.345	370.681	283.033	268.94	245.011	124.026	129.378
BnaC03g60490D	579.599	292.709	174.963	142.456	121.993	216.188	497.759	323.118	163.903	321.711	214.913	336.802
BnaA01g03150D	461.69	421.116	542.906	301.917	159.805	159.386	386.213	267.434	203.888	207.669	128.533	139.019
BnaC05g18570D	302.266	319.761	426.09	308.468	211.595	214.198	482.863	351.906	259.864	213.786	139.367	146.868
BnaA06g29670D	0.443059	4.07307	631.196	770.401	171.297	201.059	0.709732	6.69833	516.539	738.445	253.76	80.9951
BnaC05g03990D	190.969	501.696	226.886	358.772	268.983	301.515	216.622	412.967	367.755	291.801	138.072	98.3316
BnaA07g28280D	290.602	307.911	471.178	347.858	170.529	215.667	397.285	292.173	293.836	235.379	144.897	205.299
BnaC08g06260D	333.774	397.098	443.369	307.561	226.039	219.197	377.079	320.698	234.607	199.184	144.378	169.569
BnaA09g52020D	291.982	248.966	458.951	340.653	179.437	164.144	584.437	343.649	309.363	206.648	127.263	99.9134
BnaC05g05550D	409.591	497.966	375.918	177.418	123.588	94.4859	431.557	510.35	365.75	171.528	115.202	75.9277
BnaA08g31350D	0.266944	0.117295	111.564	520.2	550.91	485.168	0.21929	0.0225265	88.1135	553.339	575.864	456.524
BnaA09g49130D	364.547	484.146	495.592	283.955	255.905	168.211	303.322	333.592	198.963	171.078	157.224	117.406
BnaC09g46850D	200.97	361.778	334.388	312.895	220.029	254.729	247.274	373.346	343.985	285.944	191.374	181.032
BnaA09g42210D	600.967	289.889	234.061	204.122	343.926	186.403	491.31	164.592	127.686	178.986	296.82	188.194
BnaA02g06670D	289.376	336.369	564.254	288.272	106.949	171.82	361.326	423.298	391.926	215.673	79.4194	75.131
BnaC04g47670D	207.314	444.987	419.825	291.811	208.885	182.066	164.114	381.202	350.333	346.386	205.296	96.5478
BnaA07g13950D	0.0701766	4.34269	251.97	544.576	576.391	468.319	0.299774	8.26312	217.885	342.478	502.163	369.668
BnaC05g45150D	475.377	362.832	469.279	258.776	151.575	125.974	365.981	291.484	245.667	232.445	167.373	135.177
BnaA07g21520D	446.884	308.174	346.732	319.726	233.216	207.232	442.549	233.847	163.921	205.201	193.531	177.439
BnaC06g20160D	322.263	195.26	613.97	517.178	171.68	191.651	289.766	146.51	313.818	325.515	112.754	76.2879
BnaAnng15300D	659.013	443.148	303.809	204.68	245.29	139.223	543.134	257.946	163.575	123.211	126.645	60.135
BnaA04g09420D	404.877	399.169	278.579	219.922	162.014	168.447	394.117	378.355	315.86	243.027	150.114	131.981
BnaC03g07800D	372.864	403.547	266.177	280.075	266.539	253.797	391.699	291.462	203.02	201.374	180.67	124.802
BnaC03g18980D	170.859	162.819	928.787	536.667	65.5723	148.852	175.168	147.669	544.602	291.538	38.3653	24.377
BnaA09g46070D	559.09	213.204	242.22	195.547	210.234	145.959	563.28	268.851	210.377	206.134	219.745	196.298
Novel01275	206.775	265.827	447.554	316.486	227.818	220.978	291.265	314.625	354.577	256.321	148.741	169.094
BnaA09g14000D	1437.53	316.463	48.0494	16.4072	1.59619	1.38365	1123.53	213.146	32.2138	21.6493	2.2723	0.796067
BnaA07g31400D	350.347	338.052	476.226	279.12	177.937	141.837	326.551	243.5	248.545	275.107	194.604	153.564
BnaA07g32420D	111.583	503.56	372.741	222.983	164.101	150.679	119.579	398.532	599.934	327.908	147.132	85.7478
BnaA09g10600D	8.3339	19.2779	188.785	333.737	378.948	757.108	5.67676	14.0597	112.471	207.895	326.935	850.371
BnaCnng15190D	164.64	165.17	731.669	564.199	121.66	150.604	166.878	154.656	490.076	365.553	74.1552	31.4966
BnaC03g05020D	171.761	522.249	269.357	245.936	263.797	307.076	179.66	303.843	200.853	245.401	228.681	234.73
Novel04068	1659.75	54.4842	3.04697	1.68024	0.142232	1.25019	1403.09	39.2387	0.95149	2.29375	0.0789666	0.0263474
BnaC09g52200D	0.359347	911.11	400.043	241.998	95.0753	73.2404	0.921017	500.178	683.985	229.713	25.5649	3.6661
BnaAnng13320D	0.266443	12.7339	218.432	319.478	425.611	486.563	0	8.71038	108.535	297.924	568.609	717.517
BnaC02g42910D	15.0361	82.1497	412.871	409.242	378.291	297.857	15.5987	94.9975	279.956	351.982	498.416	327.085
BnaA06g24300D	274.157	261.216	351.263	383.376	262.596	216.084	305.571	235.158	309.084	238.369	182.307	125.996
BnaC09g38100D	795.535	384.716	74.6479	73.6366	32.2489	21.6908	893.628	558.287	200.493	89.404	14.0152	0.857303
BnaC09g48350D	0	0.52404	143.389	482.227	592.035	553.794	0.0904358	0.557399	77.1713	320.862	515.371	442.342
BnaC05g05400D	872.404	351.318	183.249	92.1633	49.816	50.849	820.835	318.178	148.918	135.06	42.4216	36.1096
BnaA07g22790D	0.0821366	0.117295	155.532	274.555	365.328	576.747	0	0	80.4772	217.785	459.98	970.239
BnaA10g19500D	942.858	229.746	22.1032	26.7325	12.3053	10.1826	1437.54	320.767	71.4782	18.9414	6.21839	1.93459
BnaCnng32920D	0	0.0229585	1.83106	9.82532	121.896	653.022	0.0257532	0.10582	3.02638	38.3534	377.779	1891.07
BnaA05g33520D	61.8349	245.68	346.235	335.035	191.617	382.998	41.3821	115.319	224.259	330.742	299.365	514.139
BnaC03g77220D	211.872	221.988	314.918	269.775	235.731	198.81	239.611	272.977	327.382	299.514	281.33	211.213
BnaA05g28470D	9.79621	74.6842	269.138	473.987	458.797	511.415	10.9897	87.6686	276.99	375.423	303.681	232.121
BnaC08g36200D	419.56	493.151	412.982	251.851	135.799	148.263	317.937	309.874	182.305	172.727	104.002	129.575
BnaAnng12280D	1.4031	81.2931	932.144	561.409	256.664	265.348	1.39138	53.2687	359.728	332.855	152.1	78.0657
BnaC03g71520D	244.482	335.042	400.671	348.668	169.409	186.969	254.273	329.584	316.917	241.069	137.961	104.898
BnaCnng36150D	271.005	262.321	386.232	348.985	194.207	223.884	296.291	248.474	268.686	252.634	157.971	155.007
BnaC03g46690D	293.57	426.868	193.032	186.35	132.818	158.683	415.111	566.969	316.03	156.797	101.125	117.727
BnaA05g16010D	296.722	442.441	360.766	289.183	122.752	127.562	278.234	397.944	352.141	260.412	95.5951	36.3759
BnaC06g26930D	414.208	356.784	380.883	229.308	139.38	126.557	398.758	311.586	273.736	213.996	129.745	77.3954
BnaCnng77870D	0.206116	0.0981149	63.4443	173.233	495.844	747.576	0.110059	0.113057	37.7325	130.71	519.005	883.71
BnaCnng38850D	56.6691	201.828	195.005	232.302	210.011	244.499	86.7675	212.53	376.932	559.515	358.211	311.188
BnaC03g36390D	887.253	608.137	86.9769	50.2854	25.3323	13.9166	830.246	440.152	28.0236	33.3633	21.0965	18.3794
BnaA06g04380D	461.528	513.619	291.837	126.301	125.519	68.1975	406.755	450.382	280.733	138.077	119.421	58.7841
BnaA01g00010D	571.5	363.78	292.95	174.012	204.428	108.036	402.104	273.55	188.526	166.772	192.066	92.7938
BnaC01g23570D	122.814	209.737	362.337	400.211	281.86	294.616	130.096	201.732	275.752	278.141	245.46	225.094
BnaA09g15400D	535.284	562.836	153.404	90.2441	83.0948	51.0409	564.766	565.683	203.228	110.176	64.915	31.4372
BnaC03g31540D	0.332474	7.91318	93.6553	275.887	498.892	843.003	0.659395	6.14836	55.2864	157.379	354.99	719.091
BnaC08g00720D	411.921	392.797	370.071	199.922	148.943	128.983	453.702	354.7	209.063	144.513	108.356	82.6357
BnaAnng03930D	386.096	307.116	401.784	256.941	174.297	165.651	402.31	222.511	173.645	188.742	159.951	164.845
Novel04636	0.183087	0.203355	7.9133	76.2229	325.559	406.792	0.0325872	0.267801	6.42929	211.361	803.317	1150.89
BnaA02g00190D	156.95	264.588	336.871	318.704	219.209	194.241	231.446	361.181	347.8	264.327	175.79	116.802
BnaA09g00730D	1148.6	182.695	2.86024	4.16125	0.177825	0.0333984	1339.66	278.497	15.1488	12.5225	0.548487	0
BnaC05g22880D	41.9846	92.2046	819.566	801.04	62.2296	194.137	41.0494	86.1244	427.307	371.498	28.5835	13.5569
BnaA04g24800D	88.2603	323.891	289.454	432.03	258.038	464.69	106.107	200.496	184.071	291.591	145.629	192.471
BnaC08g34650D	376.538	208.004	259.098	213.856	303.106	219.53	318.68	162.923	148.542	215.504	306.263	244.483
BnaA05g36250D	0.0350133	0.0333339	53.3348	99.187	166.57	616.185	0	0.0768211	42.0863	129.368	314.865	1550.86
BnaCnng10870D	1736.29	43.8545	1.93249	1.36897	1.38236	0.17702	1158.15	26.1585	0.164197	0.607995	0.755852	0.407387
BnaA01g28600D	0	0.0458158	7.92649	15.3984	100.026	870.391	0.051393	0	3.82312	17.7809	212.483	1742.59
BnaA08g11610D	202.009	233.484	329.812	299.65	231.341	192.176	221.884	258.276	317.014	264.432	226.655	193.652
BnaC04g22220D	342.888	294.62	353.12	268.767	160.109	142.478	437.657	319.546	260.186	185.652	104.363	95.3142
BnaA04g16620D	422.891	406.407	478.909	214.32	82.0316	130.512	353.464	272.753	267.272	193.305	69.3752	67.4055
BnaC03g30720D	23.9173	22.3761	193.06	482.213	369.372	639.156	25.0117	20.6998	104.813	289.313	275.995	505.406
BnaC04g15480D	367.756	328.688	441.071	246.167	105.631	153.889	380.992	303.945	289.367	190.231	77.7158	64.9997
BnaC01g26350D	325.361	284.22	378.261	266.593	251.971	167.27	337.624	198.095	189.038	219.056	173.246	156.861
BnaC02g07040D	123.975	248.675	557.295	456.423	224.255	168.148	163.663	239.06	331.22	235.099	131.911	58.0693
BnaCnng03470D	221.873	386.002	245.932	144.728	88.4253	150.248	317.089	537.998	431.346	189.591	62.625	149.069
BnaC03g49290D	432.659	575.258	264.923	148.051	61.7205	100.351	364.045	427.042	264.405	203.724	56.69	25.9463
BnaA08g25040D	267.341	279.739	251.953	265.486	218.418	189.09	210.413	259.375	277.135	299.583	253.363	151.482
BnaA09g40100D	0.175067	263.338	571.345	476.777	122.951	231.037	1.7948	124.642	590.095	392.913	70.767	77.3359
BnaA05g32500D	455.06	225.554	202.024	200.77	74.6789	136.36	549.843	273.387	354.686	325.279	71.677	51.4757
BnaA05g28950D	226.754	252.65	438.708	326.575	176.883	210.079	281.239	217.426	254.605	248.294	133.691	152.367
BnaA09g55030D	0.448938	25.6158	235.923	249.565	470.501	410.841	0.543358	20.8162	108.821	180.052	574.834	636.666
BnaA10g20830D	252.432	605.61	495.326	206.679	198.449	133.303	165.84	265.309	186.921	198.231	126.931	66.6982
BnaC03g65520D	149.994	301.458	419.939	333.266	201.401	241.959	159.728	232.032	376.656	259.286	141.824	82.5991
BnaA10g23780D	0.214199	2.9909	40.0348	108.062	419.891	482.212	0.381249	4.07302	61.7367	161.667	709.611	907.839
BnaA06g01430D	1241.34	195.139	4.61925	8.82964	0.971402	0.564989	1199.92	234.314	2.62031	5.62615	0.26096	2.14772
BnaA06g17350D	185.97	171.952	660.096	457.402	117.522	129.273	167.938	151.056	442.5	309.613	69.2262	27.3558
BnaC03g63110D	605.03	435.379	151.661	142.955	108.097	88.6598	752.599	284.918	120.799	95.5331	59.1585	44.8247
BnaAnng40430D	3.91112	224.695	592.603	322.214	72.9399	66.2083	4.24881	317.208	703.564	494.632	74.8471	5.1597
Novel04248	1474.86	59.2064	2.85751	0.936579	0.276352	5.56663	1280.75	44.3125	1.44431	1.67126	0.383573	1.59975
BnaCnng33680D	358.015	278.536	394.549	333.868	247.002	209.436	283.065	151.98	126.919	181.703	157.398	145.999
BnaA09g50580D	462.716	429.379	454.917	330.68	202.338	165.138	238.88	152.654	139.925	113.197	82.7781	88.6952
BnaC04g39260D	294.09	265.661	459.063	260.012	148.3	134.17	277.124	213.085	224.74	249.997	156.954	177.439
BnaA03g23380D	353.979	780.732	65.4622	58.5471	44.1426	58.7713	273.093	667.964	341.573	150.881	37.8012	10.9602
BnaA10g04420D	324.434	302.19	353.979	219.132	186.968	167.019	345.536	263.409	203.16	155.137	164.957	137.231
BnaC03g46700D	372.75	408.839	286.952	156.98	97.0758	110.86	383.566	415.232	234.214	152.794	98.403	100.304
BnaA01g28070D	1458.88	64.5545	3.81331	3.39949	0.141563	0	1217.62	57.721	0.739854	0.273955	0.104793	0
BnaC09g47880D	19.8766	59.0527	211.398	294.584	520.113	291.501	37.1043	47.9363	149.458	295.968	578.603	296.347
BnaCnng58700D	230.22	255.879	410.886	260.955	218.779	147.588	206.907	199.867	219.327	247.296	245.874	158.332
BnaC03g17110D	348.966	106.506	149.411	179.789	198.598	409.177	336.214	89.0484	84.7817	137.872	221.294	521.336
BnaC09g49950D	306.325	247.752	326.719	275.805	154.779	180.549	333.206	226.384	212.439	205.571	139.102	173.434
BnaCnng77830D	246.645	279.859	295.991	253.155	115.406	185.962	439.453	399.21	295.081	143.145	59.9372	63.1064
BnaC05g15180D	198.728	172.721	162.078	161.705	200.735	418.894	205.522	130.817	118.017	140.128	260.771	602.4
BnaC02g32990D	319.338	252.49	432.23	193.565	44.3275	35.9552	254.625	302.154	542.131	360.393	26.5786	2.5885
BnaC05g37670D	0	1.04002	18.8087	37.9433	168.303	800.378	0.202891	0.312628	9.13237	41.1164	280.245	1406.2
BnaCnng05190D	700.967	366.606	17.1329	94.8302	134.144	157.192	648.231	258.768	16.77	115.233	109.693	143.233
BnaC08g00580D	271.106	245.673	338.947	293.632	177.998	166.437	304.602	254.881	213.281	208.882	144.406	141.962
BnaC08g35660D	0	0	7.12083	80.8523	282.406	647.271	0	0	7.15737	118.647	409.446	1208.64
BnaA03g19630D	196.886	252.957	364.992	295.81	198.225	189.123	227.031	253.913	230.367	199.414	162.876	178.612
BnaC04g42010D	223.087	362.851	253.999	164.192	87.7338	159.496	288.75	440.61	370.145	165.948	68.4268	148.471
BnaC04g50590D	387.408	512.399	184.88	150.333	81.7144	129.077	353.767	408.545	261.104	142.575	60.2493	55.6859
BnaC03g11560D	152.938	617.567	144.811	155.142	52.3167	199.564	174.486	537.33	366.388	231.034	34.25	57.9053
BnaC01g21920D	142.902	429.508	149.951	254.375	206.939	326.72	174.14	349.032	195.241	189.564	141.668	161.134
BnaA09g01040D	123.21	134.947	253.653	306.854	345.796	222.513	132.727	118.662	208.148	218.971	388.422	267.022
BnaCnng37670D	1095.2	330.451	37.8017	23.5228	2.15683	2.55844	887.403	263.989	37.9698	27.094	1.99577	0
BnaA08g25110D	568.556	174.972	147.471	193.85	219.557	158.897	551.475	122.879	88.264	125.724	201.946	153.635
BnaCnng26110D	391.179	315.481	83.7898	99.4616	133.659	230.296	382.281	315.075	134.556	125.672	162.663	324.405
BnaA04g23910D	210.715	403.527	352.206	210.762	145.063	137.405	201.177	282.824	267.062	248.674	155.261	79.7483
BnaA06g03920D	3.58312	334.387	419.227	231.212	112.507	167.788	3.5232	503.691	499.378	285.747	92.8377	27.5503
BnaA03g14140D	351.798	88.0645	126.902	160.424	191.356	373.395	361.383	75.6218	62.9458	117.509	231.14	539.395
BnaA02g00540D	395.595	236.698	207.714	192.32	143.863	209.495	423.919	240.259	219.778	225.588	94.0378	90.6366
BnaA05g30690D	446.305	304.96	388.184	182.477	89.6641	112.196	370.873	204.309	176.897	182.367	101.286	118.1
BnaA05g07530D	168.74	326.771	169.613	233.186	223.959	237.622	184.819	344.526	257.267	255.864	153.558	120.27
BnaC04g47870D	246.596	300.187	356.329	268.473	167.955	189.22	243.93	255.269	221.074	155.196	114.808	154.003
BnaA09g49160D	242.775	382.48	324.4	246.47	210.68	163.074	236.241	281.784	238.587	150.021	115.738	77.428
BnaA01g27570D	62.6559	246.553	237.135	318.442	233	320.671	79.2532	207.444	302.016	284.876	178.701	194.944
BnaA08g21690D	436.817	271.687	238.003	237.898	72.9388	201.817	429.253	186.492	147.743	193.609	54.7563	189.693
BnaC08g46110D	43.2844	112.145	483.296	453.474	173.824	145.863	45.3442	113.312	385.275	377.668	226.782	87.4773
BnaA10g14400D	442.793	379.722	264.769	152.16	88.33	109.181	382.998	295.519	194.719	176.515	79.4246	81.0691
BnaA08g11130D	0.107733	6.09241	344.7	512.62	280.458	327.092	0.0460206	9.0767	221.607	388.18	285.978	271.216
BnaC03g65980D	0.0688498	5.11269	287.741	442.414	283.556	339.022	0.245089	9.01324	243.253	376.308	350.894	299.087
BnaA04g26560D	354.978	432.64	108.136	112.09	35.0085	80.2717	564.734	547.552	236.431	105.252	25.7602	25.9401
BnaAnng10580D	1163.55	276.967	70.4898	24.9675	3.8677	6.77987	761.499	217.14	61.2405	29.1077	8.21816	1.32678
BnaC03g32940D	197.407	290.922	304.497	278.464	88.7423	186.52	214.937	277.653	293.145	248.892	94.3994	135.859
BnaA03g28560D	261.25	232.935	403.648	264.761	163.51	131.943	268.158	194.55	215.156	210.108	145.456	116.587
Novel05056	94.199	199	197.116	194.951	168.623	184.167	94.3877	275.771	269.314	292.234	274.784	356.419
BnaA04g15980D	257.101	239.204	449.548	257.355	124.128	140.712	228.719	197.948	218.783	213.23	124.528	140.485
BnaAnng08830D	246.545	293.106	269.109	199.08	124.232	131.894	317.623	359.867	270.197	175.775	108.919	92.4092
BnaAnng15150D	329.658	339.432	293.957	162.399	152.807	92.7582	400.781	286.664	182.875	147.113	135.385	64.6012
BnaA09g15710D	74.6013	193.966	109.13	170.667	201.722	309.555	78.7016	237.695	234.639	414.479	280.838	268.98
BnaC03g20800D	308.003	203.678	322.98	237.154	178.044	134.157	375.59	198.745	214.263	165.316	146.322	88.0746
BnaC09g44540D	467.383	309.354	264.855	203.33	68.0682	129.748	409.004	220.413	161.781	184.793	49.7768	103.364
BnaC03g31580D	254.13	179.449	379.586	331.25	158.538	154.034	338.934	152.955	196.827	211.074	116.715	97.4694
BnaAnng35040D	0.0366583	2.2336	5.99514	15.7178	99.5335	645.043	0.117445	2.4129	4.68491	27.393	267.335	1492.19
BnaC03g57360D	301.165	303.49	261.602	188.827	167.708	181.785	247.178	211.894	156.276	161.791	168.336	190.718
BnaC02g45160D	0	0.383165	1.94774	12.4487	92.3996	658.717	0.307006	0.378445	1.65494	29.8227	217.47	1524.28
BnaA05g33200D	376.284	325.523	188.122	195.793	119.4	99.1832	357.637	319.232	202.024	186.144	99.2504	70.7059
BnaA02g00670D	68.3103	414.223	55.3158	169.361	69.9818	144.42	68.4597	641.124	383.904	384.233	66.9921	69.1546
BnaA02g04810D	280.238	270.744	330.069	209.441	112.225	109.308	305.322	277.053	241.386	193.312	106.344	97.7116
BnaA01g34880D	245.132	285.375	152.553	166.74	197.357	142.48	279.194	293.429	243.261	215.221	194.26	115.587
BnaAnng24550D	788.293	319.581	244.351	73.0735	18.5692	17.0752	629.976	241.457	97.6698	76.6624	18.2822	2.33906
BnaA07g11370D	18.6123	155.517	207.247	404.183	316.246	209.896	17.6774	135.267	272.279	371.474	290.671	125.396
BnaA03g03530D	171.425	477.608	197.502	158.819	171.792	200.893	152.738	306.424	164.088	177.134	143.204	199.923
BnaA08g06170D	454.133	352.285	259.88	153.319	134.08	87.3849	321.284	272.59	173.889	110.476	132.551	68.6387
BnaC08g25790D	0.239434	23.7637	213.163	202.289	374.996	345.717	0.703169	18.3865	105.996	162.436	474.26	597.583
BnaA10g02560D	188.04	274.34	329.872	285.164	137.24	164.631	210.623	269.372	254.798	200.306	113.516	88.6241
BnaC04g13200D	154.924	235.471	299.097	263.937	187	170.619	204.526	278.008	255.362	193.056	147.601	123.893
BnaA06g16030D	387.324	377.434	191.901	119.465	53.0055	40.6792	294.314	441.894	254.734	248.583	80.6179	15.8004
BnaC03g54530D	323.941	204.333	165.143	246.661	214.075	166.439	296.002	169.422	129.885	175.111	234.257	179.849
BnaC04g25490D	218.912	265.837	403.801	289.962	112.637	134.747	207.613	237.99	264.868	204.198	89.6856	65.9518
BnaA09g04300D	0.22165	0.211018	98.4638	430.565	472.036	538.341	0.202891	0	45.279	141.18	291.976	475.098
BnaC05g12070D	119.364	110.025	559.96	473.617	122.094	108.111	126.617	121.136	373.246	280.263	82.6688	16.0074
BnaA03g35720D	0.113793	0.21667	91.2883	392.297	490.495	431.934	0.121523	0.0624171	60.562	291.886	427.133	294.557
BnaC06g38200D	347.376	264.92	147.724	195.572	171.868	145.264	295.028	287.805	155.77	182.454	175.256	106.443
BnaC07g42500D	458.542	421.504	89.7378	96.6241	11.1304	91.6735	354.528	460.146	283.398	196.87	4.29465	3.38329
BnaC03g11510D	324.522	333.822	236.896	204.208	196.959	124.484	266.744	224.364	133.057	157.965	180.828	87.6512
BnaA08g21180D	104.476	173.758	414.405	411.33	157.745	170.55	109.574	193.178	267.31	258.297	119.106	89.6702
BnaA03g48430D	357.561	216.259	267.105	145.352	89.7199	79.2397	416.047	304.621	217.119	185.643	123.73	66.5214
BnaA02g14450D	211.983	233.102	408.355	243.237	146.98	131.115	191.962	192.934	206.022	202.177	164.714	130.516
BnaAnng16660D	690.854	437.058	210.173	96.3003	47.1166	67.962	509.378	173.553	67.8883	91.4926	36.8907	32.7635
BnaC09g36740D	339.086	345.563	265.941	172.131	104.285	116.523	299.433	245.754	179.775	196.121	94.8641	100.379
BnaA08g02320D	162.724	298.169	269.001	200.22	121.823	113.529	195.636	344.722	345.756	239.545	115.737	50.1893
BnaA04g20190D	231.795	249.26	342.267	220.838	130.688	130.838	288.179	266.904	226.145	171.091	95.4157	102.076
BnaC01g35070D	106.242	196.58	246.174	273.189	211.857	278.419	123.212	192.973	276.757	223.69	148.351	177.771
BnaA03g01450D	191.815	267.499	374.575	224.72	137.758	124.032	205.188	258.187	234.719	214.788	109.378	112.187
BnaA09g23960D	249.239	245.604	309.08	212.714	113.788	147.558	272.87	242.693	232.781	181.977	103.977	141.627
BnaCnng74880D	19.2822	337.343	181.225	325.929	286.043	314.422	22.7844	179.52	212.129	221.054	220.668	130.747
BnaA04g05010D	0	0.207083	2.48446	8.37773	89.3146	491.6	0.0258102	0.450729	2.36524	31.7123	295.601	1526.86
BnaA01g01470D	260.584	276.364	367.347	238.986	133.984	147.71	280.645	228.842	201.593	132.929	81.0051	93.5424
BnaA02g06680D	296.726	317.543	190.256	171.822	144.16	123.446	318.018	282.793	164.651	168.682	131.587	124.548
BnaA09g49140D	250.703	351.259	222.947	192	209.615	156.596	224.382	274.188	178.483	148.093	127.156	95.3175
BnaAnng29030D	104.032	345.179	325.637	202.855	105.334	101.733	124.081	270.717	412.026	293.433	105.918	34.9208
BnaC05g27530D	304.262	373.654	231.706	185.435	112.458	87.2854	308.238	293.799	240.713	169.236	85.678	32.9792
BnaC03g09880D	324.741	303.79	252.058	143.441	110.318	76.6865	404.298	325.383	220.212	125.889	88.3258	47.6704
BnaA04g21530D	306.402	303.905	478.541	169.731	65.6022	103.132	284.701	245.098	215.269	163.576	47.1066	39.5431
BnaC09g03690D	1002.84	166.195	13.2337	6.93778	4.69658	5.36981	1035.77	147.326	21.6075	9.87765	2.18879	3.27045
BnaA08g01520D	277.028	273.03	319.399	189.252	120.445	109.399	311.024	265.279	208.567	158.884	99.3438	85.4806
BnaA07g21990D	248.905	421.124	103.843	111.641	94.6328	101.293	205.112	411.875	309.377	209.437	109.036	84.2975
BnaC08g15100D	374.153	211.299	146.348	167.962	179.73	154.17	380.713	186.091	123.206	139.936	186.068	157.363
BnaA05g23590D	241.462	225.218	313.747	195.464	147.091	112.452	237.247	215.3	200.481	210.223	166.822	135.084
BnaA08g24600D	479.049	365.04	97.0495	98.508	76.6752	103.547	365.431	302.837	207.743	134.072	72.2463	96.2518
BnaC05g35990D	0	0.245122	5.15599	18.7915	121.463	471.121	0	0.403505	5.33591	37.1551	302.088	1435.07
BnaC06g08900D	352.343	253.706	291.528	187.737	84.7384	99.6927	431.321	201.704	165.456	183.119	72.7649	70.7939
BnaCnng09170D	328.738	267.787	310.999	193.986	201.61	126.079	244.991	189.603	168.006	147.788	125.427	89.75
BnaC08g31100D	253.767	296.584	437.25	248.833	106.774	155.391	183.575	171.772	148.762	157.769	82.5473	146.934
BnaA01g06440D	257.715	229.482	247.066	200.203	118.236	124.514	247.73	214.359	248.379	206.988	156.655	136.162
BnaC04g51120D	1.11471	7.0042	138.028	238.915	186.264	585.836	0.952344	6.48119	56.9197	135.506	195.532	830.412
BnaAnng00820D	268.734	244.164	321.972	172.621	96.2628	119.326	242.298	264.019	194.274	207.386	127.616	123.795
BnaC05g00740D	330.111	161.741	166.627	117.452	238.167	148.689	276.905	125.489	114.21	136.208	302.801	264.02
BnaCnng01440D	479.963	387.82	130.028	138	108.497	136.466	322.917	262.315	163.683	134.881	51.4844	64.3861
BnaA03g24160D	207.324	226.176	303.659	244.681	170.077	152.802	270.079	232.981	203.404	161.223	104.339	101.802
BnaA01g19460D	450.152	350.838	82.5697	87.2609	64.4663	70.6418	363.817	365.933	233.867	175.759	85.9016	45.8381
BnaC07g11370D	310.883	195.509	193.72	211.588	282.103	138.14	249.527	129.994	110.403	176.713	279.826	96.7443
BnaC04g54510D	128.376	323.929	355.278	43.489	215.288	107.787	157.977	258.078	379.969	38.1511	179.071	182.436
Novel03014	28.6996	50.2725	102.845	262.689	275.486	406.057	32.6216	44.4987	90.5963	253.922	283.538	538.412
BnaC03g59520D	126.769	107.417	527.014	634.745	26.7596	169.193	120.232	76.4656	242.962	298.173	13.9594	14.8045
BnaC03g41720D	322.1	207.15	340.74	170.773	91.3239	105.543	380.806	231.186	235.969	123.865	74.2009	73.4402
BnaAnng02450D	93.8464	158.636	544.634	366.162	69.8616	144.523	100.32	142.545	380.51	238.157	45.3828	70.0674
BnaC09g35280D	237.799	301.812	335.507	186.81	94.5097	118.984	277.362	307.618	217.233	140.334	65.331	66.722
BnaC02g16670D	1.66358	169.729	341.634	392.779	102.432	105.174	2.30956	160.903	587.823	353.364	81.7268	45.1455
BnaA08g27790D	199.249	199.262	306.188	254.975	152.441	159.056	219.153	201.744	192.675	183.655	125.483	149.26
BnaC06g25310D	357.247	312.779	327.675	165.047	124.804	90.5476	256.85	212.742	150.826	149.789	113.551	80.7778
BnaC03g48970D	158.115	159.177	347.932	364.051	149.323	175.732	166.607	160.702	232.103	225.536	116.888	85.7579
BnaC08g12410D	294.278	214.937	328.952	201.6	128.499	110.152	290.215	174.213	170.495	189.739	130.106	107.528
BnaA07g32230D	564.28	280.484	126.823	80.7693	55.7819	41.9347	593.393	229.029	148.135	94.0711	72.4416	53.1793
BnaC03g77170D	91.8642	97.6573	238.174	341.312	172.548	239.363	104.5	119.054	215.663	335.107	197.279	186.882
BnaC01g00920D	435.542	291.77	204.455	118.921	110.65	80.6214	442.302	217.277	142.591	116.853	103.597	73.8958
BnaA07g24200D	234.553	234.992	319.238	175.446	139.621	78.893	319.616	243.049	214.026	164.436	128.09	86.0279
BnaA03g39340D	216.743	295.071	171.766	177.556	128.954	111.238	287.526	383.915	240.531	141.618	101.391	77.8174
BnaA01g32860D	49.2792	112.911	323.109	349.759	273.57	182.707	43.9199	101.953	261.076	255.454	247.943	130.461
BnaC05g43420D	225.133	202.954	336.042	282.591	190.433	145.03	241.102	160.048	182.921	154.96	130.303	79.226
BnaA03g08900D	95.2388	123.857	344.201	343.613	171.523	201.177	86.33	144.79	244.575	248.974	175.314	150.963
BnaA07g15900D	182.546	252.472	271.537	265.745	154.617	117.618	187.017	255.538	245.875	222.087	123.408	49.2985
BnaC07g49630D	114.009	130.38	409.399	389.16	177.102	171.469	88.133	94.3474	224.451	261.793	172.986	93.6175
BnaC08g17160D	235.302	274.153	181.42	212.543	130.205	132.207	235.512	210.346	297.904	255.367	125.91	32.9008
BnaA07g28180D	212.434	222.529	315.441	184.979	168.162	99.0645	224.743	205.809	190.534	205.919	167.198	123.423
BnaC05g36760D	1094.41	48.4171	3.79384	2.12561	0.243909	0.18324	1117.36	49.3129	1.35973	0.611874	0.752317	0
BnaC06g27180D	454.622	326.566	174.034	142.337	97.6937	136.184	331.258	218.305	121.56	130.347	86.9076	97.7141
BnaC06g08730D	216.186	212.004	309.931	205.066	133.781	144.429	251.631	218.541	196.854	166.387	114.426	147.971
BnaA08g15810D	302.058	225.472	208.638	180.542	138.203	131.516	387.59	239.914	192.204	141.677	89.1824	78.4474
BnaC07g34290D	185.652	230.584	320.46	223.497	160.931	120.877	248.297	249.935	216.777	150.675	121.763	82.6037
BnaAnng40550D	230.802	151.725	357.22	276.744	60.0789	125.115	207.262	139.389	314.973	307.363	68.2271	72.3236
BnaA01g13310D	197.7	255.199	182.801	205.773	110.337	192.773	200.347	219.348	163.417	193.631	125.733	263.656
BnaC04g04080D	1.72931	117.454	274.684	482.839	39.4436	284.859	7.83754	103.091	431.957	512.126	32.801	20.2674
BnaC02g31830D	3.82812	283.649	545.782	282.723	45.046	44.2719	1.59538	223.191	493.103	322.535	55.9569	4.00075
BnaA04g26120D	278.925	242.762	338.756	217.086	132.045	115.882	269.014	172.823	156.64	172.604	102.992	105.29
BnaA02g33270D	418.022	341.824	125.349	75.8822	119.795	47.2016	501.5	334.948	163.11	72.2986	77.3058	23.5596
BnaA10g11350D	499.646	253.27	257.941	142.205	66.2793	76.2457	468.274	161.098	118.868	125.656	63.2464	66.4129
BnaA01g07470D	159.536	130.569	260.149	239.721	222.548	179.364	186.082	130.282	137.855	215.698	218.607	212.306
BnaCnng19320D	206.93	285.449	246.242	167.7	127.608	155.267	207.063	273.957	247.875	162.136	95.764	116.449
BnaA03g21210D	247.716	306.823	236.547	126.015	58.8645	56.3178	291.777	399.734	331.485	148.795	50.1237	34.2891
BnaC03g26430D	371.781	253.094	274.447	157.678	72.9096	94.6505	378.538	260.023	192.966	130.304	52.5216	43.04
BnaC01g41990D	156.864	164.453	258.013	241.647	246.924	172.604	180.036	143.372	148.834	179.43	202.621	185.169
BnaA10g15570D	560.767	290.064	51.2024	47.4102	25.7482	15.0717	641.312	419.189	151.175	55.3877	11.627	1.02573
BnaC02g03430D	244.079	242.393	337.098	227.076	135.699	132.529	237.497	168.827	172.597	153.919	103.785	110.229
BnaC03g11650D	275.415	266.905	498.664	201.436	55.6519	107.826	224.126	198.659	210.915	147.778	41.5395	34.0778
BnaA09g00390D	34.7424	169.387	264.601	257.733	169.775	165.125	66.9054	193.153	288.767	244.809	212.981	190.195
BnaA04g13080D	50.683	99.8901	394.703	312.287	146.213	135.124	61.7224	156.629	332.427	310.633	176.724	74.386
BnaC02g12750D	114.456	315.557	346.394	124.472	80.4356	69.783	109.549	278.327	538.357	122.561	71.8491	78.1505
BnaA09g13970D	221.343	156.631	525.346	320.69	81.4842	125.223	184.624	105.283	226.311	202.821	61.6496	34.2576
BnaCnng30950D	178.755	255.141	134.955	122.383	128.423	149.108	206.173	293.136	274.534	217.366	159.805	117.944
BnaC09g37460D	190.646	234.827	317.746	202.079	124.928	120.572	204.226	232.278	199.201	181.415	111.214	115.021
BnaC04g10750D	215.517	189.614	282.519	200.699	152.443	122.666	262.142	222.777	204.489	158.668	128.007	93.0714
BnaA03g17280D	431.504	231.304	281.848	145.98	53.685	93.3535	397.998	181.835	163.75	135.712	48.9266	66.6553
BnaC05g37290D	200.025	197.872	264.462	189.136	133.917	121.921	233.526	226.458	197.554	173.531	141.29	152.282
BnaA07g18920D	210.824	215.057	334.282	182.138	134.851	118.141	166.545	165.986	155.412	207.583	153.832	186.133
BnaC03g41580D	0.0864709	0.0274411	125.894	364.639	472.138	283.502	0.123126	0	73.2084	249.11	433.473	228.31
BnaA09g51180D	281.924	305.04	368.081	199.198	137.108	127.138	170.712	164.974	149.199	147.883	96.5823	81.491
BnaUnng00740D	11.2116	126.718	191.08	349.238	124.128	262.987	20.5694	192.061	178.071	349.633	154.708	265.719
BnaA08g04760D	5.91725	153.403	457.449	384.337	87.4053	89.8332	5.18499	120.84	350.773	486.926	68.0429	13.9312
BnaA07g38700D	126.872	115.895	407.47	320.647	111.393	91.0247	166.735	148.971	380.376	228.763	92.1059	28.7451
BnaC03g66290D	257.389	208.186	344.997	163.734	103.229	83.0236	229.436	223.493	170.127	197.229	127.556	110.472
BnaA03g35700D	0.109242	0.416007	155.972	359.245	325.428	311.942	0.174993	0.389483	96.1551	325.069	382.129	259.844
BnaC02g38340D	0.193691	28.1211	215.965	438.129	90.7584	249.292	0.186163	18.9961	446.792	567.75	80.0918	76.493
BnaA02g00480D	213.743	227.136	491.904	189.392	72.4241	87.7545	263.48	231.315	214.648	151.214	43.5918	23.6567
BnaCnng12070D	327.602	331.17	212.35	128.821	94.7756	79.2254	374.105	275.903	166.193	114.251	66.9308	36.8159
BnaAnng33970D	130.94	189.548	238.983	210.184	134.98	152.002	161.772	241.068	226.075	197.78	153.238	169.971
BnaCnng31510D	81.1026	194.512	183.436	223.11	103.49	147.982	135.805	325.796	342.202	290.777	110.929	66.5936
BnaC08g50170D	0.0593704	0	4.29993	69.4023	137.724	406.571	0	0	6.76725	77.4097	262.14	1239.75
BnaC02g47680D	19.0473	148.269	599.116	326.242	86.6982	134.033	17.3498	137.663	347.172	287.429	73.0866	26.8622
BnaC09g41470D	211.13	246.504	240.988	173.764	190.559	164.412	185.986	194.165	135.329	158.973	160.269	130.632
BnaA03g26700D	228.449	181.365	386.415	253.982	127.4	110.976	255.326	140.866	170.569	165.795	95.0321	72.1488
BnaA10g22340D	155.597	220.055	229.767	189.845	132.393	127.741	219.313	284.765	256.042	164.824	115.643	90.4863
BnaA01g24800D	268.536	197.414	249.421	197.334	155.661	101.082	381.379	188.804	160.077	120.9	98.589	65.0459
BnaC03g72450D	218.967	285.807	357.068	213.93	93.9019	98.351	196.037	197.206	165.02	169.488	97.6716	89.089
BnaA05g32110D	978.567	253.236	38.3902	30.2027	3.09224	7.00712	691.598	118.468	25.7874	17.0924	7.12221	11.394
BnaC08g19950D	64.4111	147.741	362.889	338.242	133.37	142.824	75.2832	185	293.35	234.411	122.122	80.9065
BnaA05g02480D	193.961	235.931	270.392	185.772	116.752	161.01	258.084	230.337	180.483	125.93	85.9209	135.766
Novel03869	35.0081	124.077	587.425	347.865	93.9681	115.163	41.7813	90.8561	281.034	303.382	108.857	48.5712
BnaAnng32050D	1145.29	189.145	15.1432	9.47654	0.80219	1.26557	663.419	126.073	13.7514	11.2119	0.742286	0
BnaA07g34760D	0.414842	0.131648	6.46131	18.8784	95.9582	438.717	0.886042	0.606789	4.77627	23.4172	267.928	1318.07
BnaA10g06670D	219.436	204.095	226.445	230.293	176.697	181.009	220.797	153.38	142.32	179.639	133.686	107.784
BnaA05g14040D	0	5.75139	2.37671	2.10328	104.813	534.968	0.367703	10.7479	2.01817	0.815499	191.644	1319.1
BnaA06g06460D	853.579	527.015	102.895	36.6715	3.16654	2.85468	382.775	206.883	40.91	11.8474	3.7505	0.351946
BnaA02g11570D	0.0312119	0.148574	1.56779	43.1438	249.321	640.097	0	0	3.19828	70.3021	284.592	876.948
BnaA02g04690D	221.436	231.615	220.847	177.816	136.589	137.674	229.856	222.515	175.745	161.651	132.006	120.787
BnaC07g38680D	169.517	233.576	242.461	202.873	120.187	140.383	179.111	222.622	144.123	191.464	135.969	173.468
BnaA06g04240D	951.604	202.908	9.57081	20.5066	0	0	816.402	139.135	6.41453	6.46839	0.668057	0
BnaUnng02350D	773.603	265.068	151.622	67.9159	13.1411	14.095	527.743	168.408	90.0285	60.939	15.3829	3.51946
BnaA06g05290D	250.197	331.208	200.074	129.323	61.5012	58.6306	267.771	389.922	236.564	141.509	48.8803	27.4276
BnaC06g36900D	258.485	261.687	272.674	234.401	143.509	159.925	179.111	175.884	144.456	147.251	77.4488	79.1619
BnaA03g30650D	242.697	195.881	287.49	233.549	114.12	108.651	298.492	200.066	181.132	136.866	72.692	60.9778
BnaC04g39580D	112.508	107.52	170.523	193.221	339.692	236.099	80.1767	77.6028	89.6456	119.031	297.46	304.574
BnaC02g00380D	326.179	261.967	434.96	193.898	41.5474	81.2305	344.153	151.497	156.27	92.7542	32.1424	10.9347
BnaC09g16150D	325.045	314.238	100.223	66.7487	48.7841	43.1737	432.42	452.343	158.524	99.1006	53.8595	32.4623
BnaC08g18050D	246.607	243.231	266.734	154.494	105.275	87.9363	247.969	236.979	194.336	148.745	106.937	85.2233
BnaA08g22020D	75.6067	262.96	356.84	243.332	94.0462	99.8424	100.268	311.649	299.345	173.625	76.768	29.974
BnaC05g47090D	643.745	318.196	117.584	46.1898	11.3166	10.0084	541.785	261.367	96.7271	54.3653	21.8709	1.06142
BnaA03g10670D	228.528	174.293	267.543	174.638	118.807	103.958	280.123	202.214	200.084	167.435	104.688	101.329
BnaA06g01990D	918.352	95.5166	3.07668	4.63452	0.856866	6.42811	926.224	146.089	5.05404	4.8299	1.07605	8.90008
BnaC05g20160D	131.261	269.023	194.607	132.081	68.6248	144.496	159.226	345.947	331.634	136.341	57.6721	148.977
BnaA07g33620D	362.372	362.96	112.282	97.4519	52.617	65.3916	381.672	320.025	167.713	91.0167	57.4173	48.4706
BnaA02g24840D	525.903	313.357	165.245	64.4452	12.1008	14.4024	449.38	295.54	158.107	107.88	11.1343	1.00745
BnaC03g01010D	255.003	286.498	266.492	166.353	105.134	90.7611	241.84	226.386	167.18	137.583	98.258	76.0622
BnaA03g43610D	193.945	176.958	323.217	226.161	132.721	123.657	214.78	146.76	169.609	173.102	129.291	106.626
BnaA02g14990D	1.71584	167.329	359.114	306.263	120.738	171.129	2.77913	224.592	393.492	224.666	84.2067	59.9843
BnaC05g02680D	0	0.0559149	1.09773	42.0957	235.611	541.587	0	0.257722	2.29911	59.1892	292.724	933.958
BnaCnng18480D	1.19717	2.84936	31.1161	87.9448	297.195	568.394	2.07755	0.492497	10.6823	70.7092	279.882	756.024
BnaC03g01450D	241.004	188.643	286.634	186.782	101.631	114.945	238.529	197.277	158.67	167.382	111	112.478
BnaC03g31600D	7.55251	412.926	389.292	125.577	27.4824	42.0184	14.9788	442.08	354.034	246.438	35.3273	4.54053
BnaA08g27100D	174.982	155.364	148.172	199.595	121.036	159.145	184.66	172.16	296.392	297.281	117.722	73.625
BnaA10g15620D	209.022	194.957	242.119	229.129	144.878	146.251	234.783	163.765	139.307	143.633	129.287	122.744
BnaC01g19320D	0	0.0597711	42.3169	343.116	635.044	480.046	0	0	31.0101	173.68	225.501	167.943
BnaC08g06360D	290.03	315.663	194.151	115.106	75.04	77.4097	296.783	297.693	181.959	132.566	67.6622	51.7444
BnaC02g07610D	156.432	282.529	194.848	198.942	115.412	151.352	167.378	282.127	206.626	149.313	89.4231	98.6604
BnaC01g04410D	255.28	188.48	227.685	197.666	118.429	114.663	354.489	212.56	147.62	118.701	81.4561	74.2996
BnaC02g33660D	96.4407	170.963	300.016	287.403	101.847	180.727	121.957	192.821	243.842	194.018	76.9693	123.366
BnaC03g20760D	383.921	245.204	319.641	136.681	52.528	86.3129	305.453	167.201	156.372	142.056	40.79	52.4027
BnaC04g01740D	42.3311	363.206	279.517	155.503	104.13	198.441	44.0848	197.622	259.048	122.775	150.206	168.139
BnaA07g07430D	74.9274	124.467	215.549	298.851	137.019	330.518	64.5876	106.069	136.73	153.572	98.0984	344.28
BnaC02g11640D	466.308	241.267	306.899	171.787	89.6	67.0142	374.283	114.394	72.0348	87.4569	48.494	43.935
BnaC02g02880D	219.828	191.843	315.297	176.386	112.924	122.663	171.763	136.065	129.452	167.78	127.102	209.868
BnaC03g40660D	221.577	193.186	341.161	209.83	119.477	105.238	208.34	163.535	156.273	149.174	106.712	104.447
BnaC05g32380D	782.66	210.477	27.4246	17.2918	6.61101	3.88394	742.964	218.925	35.4993	21.908	6.49034	1.40012
BnaC02g19120D	811.017	263.731	19.517	12.9599	1.41563	1.8128	684.314	233.594	22.6664	21.1693	2.38167	0.595986
BnaA01g14270D	325.228	192.403	246.107	139.485	93.3405	97.8238	306.155	172.228	142.665	181.115	98.9361	73.8751
BnaC04g42020D	166.265	265.917	131.423	107.571	66.9046	134.191	185.449	372.949	311.828	134.736	53.1304	138.734
BnaC09g54550D	380.891	179.508	13.3142	16.4492	7.18991	6.54897	816.78	496.765	96.7261	49.6644	4.41235	0.448558
BnaC03g35870D	166.494	219.998	301.329	200.457	115.761	114.515	166.393	181.686	159.927	182.342	127.841	131.299
BnaC02g00930D	442.65	359.558	98.548	77.3174	70.0409	35.898	437.247	247.994	137.989	70.1427	65.3254	23.4495
BnaC07g19160D	204.298	167.722	205.225	191.815	225.302	128.413	278.683	172.607	138.822	107.452	146.158	97.0608
BnaA03g56700D	34.3615	31.5787	103.713	282.602	183.665	473.481	31.1806	21.4624	40.3624	162.298	167.318	531.006
Novel04827	130.33	182.395	289.719	109.481	50.7806	59.0626	249.695	247.833	396.213	279.587	50.4333	17.4729
BnaA03g20420D	25.6814	62.4011	236.064	391.654	109.894	141.511	26.1101	73.0759	250.542	496.882	194.445	54.4398
BnaC08g46780D	189.681	253.625	224.793	148.067	101.774	102.894	244.525	294.038	211.07	136.461	80.3493	72.5826
BnaC04g10490D	0.113204	14.4956	381.973	391.502	240.158	163.49	0.483574	13.7848	215.056	279.85	260.012	98.4566
BnaC06g06120D	11.2022	247.222	436.104	163.163	88.3867	77.8575	8.56937	309.625	401.886	203.272	79.6	32.138
BnaC03g11550D	189.797	207.765	289.803	215.241	126.85	103.716	216.938	209.31	166.58	147.637	102.418	82.7789
BnaC08g45990D	180.549	165.592	194.402	135.061	91.7919	82.9756	272.176	253.645	216.991	194.704	158.332	110.478
BnaA06g13760D	247.529	177.24	171.261	127.132	166.998	169.687	239.866	161.953	127.186	107.303	184.652	174.361
BnaA09g48920D	200.451	111.41	473.908	435.095	97.0869	125.381	153.499	69.5241	184.269	152.849	32.4114	16.5647
BnaC04g56360D	217.792	169.167	278.159	226.983	127.335	120.836	256.214	166.867	166.373	162.774	83.5776	74.911
BnaA01g06650D	1052.19	85.8428	3.34219	5.45586	0.286496	0	769.6	120.221	4.79143	6.87908	0.176735	0
BnaC05g13770D	0.0407618	0.931359	105.088	298.635	325.74	459.412	0.217653	0.760185	55.097	163.303	196.844	437.397
BnaC05g35690D	236.947	320.531	89.6511	104.502	117.549	94.8799	262.506	330.491	186.076	125.979	93.6848	77.4495
BnaC02g20900D	324.422	311.764	137.899	115.16	60.2575	107.322	307.21	235.966	108.128	135.485	60.9365	134.776
BnaCnng58850D	211.362	157.004	307.589	221.292	103.75	110.888	247.065	144.342	159.595	182.648	88.9093	102.533
BnaA09g19870D	229.507	140.379	379.278	320.017	78.9553	103.401	197.58	112.672	221.801	191.216	42.4018	17.3535
BnaC01g17020D	100.408	53.4937	335.085	252.375	24.9869	105.623	204.187	152.41	423.964	307.945	40.8612	31.6751
BnaCnng03460D	143.329	267.254	107.807	86.9752	56.9688	118.999	199.149	405.569	332.547	142.197	52.8532	110.201
BnaC02g16650D	1.2138	134.336	399.316	319.229	75.0382	87.5105	2.43046	137.54	473.462	286.046	64.2799	40.1424
BnaC04g47570D	0	0	0.120958	0	9.35255	545.731	0	0	0	0.674429	246.485	1217.02
BnaA02g05040D	395.881	271.689	119.934	127.006	102.591	89.2457	375.039	178.424	98.7159	127.203	85.215	47.6435
BnaC08g21480D	295.77	239.487	266.247	157.89	103.794	101.283	280.069	158.728	109.861	120.479	83.9995	98.6365
BnaA06g05510D	173.86	198.297	297.217	214.811	100.42	106.752	227.809	198.282	198.039	141.834	76.253	80.2436
BnaC06g42550D	247.176	255.368	323.793	198.918	109.31	99.9826	191.157	161.28	125.624	130.147	81.4279	83.6542
BnaA07g16150D	245.991	197.478	254.299	189.091	127.577	96.2251	207.04	162.579	144.414	166.619	122.343	92.1136
BnaC01g38510D	89.3994	291.911	322.808	81.6503	67.4619	89.7286	84.5981	261.19	457.352	81.5336	48.0596	129.543
BnaC06g16140D	311.508	268.661	149.487	109.712	96.9354	59.3765	325.06	270.498	168.898	114.824	83.1268	44.9259
BnaA10g01380D	230.305	207.766	286.454	194.83	113.9	100.738	215.319	150.54	150.586	152.11	104.022	94.5539
BnaC03g50130D	113.483	108.538	226.306	202.847	199.95	185.22	112.442	113.466	164.511	162.467	207.05	204.284
BnaAnng00480D	137.124	169.557	182.525	195.131	166.592	143.038	127.444	127.585	171.862	210.538	204.557	164.076
BnaA02g17620D	267.947	223.442	214.798	169.996	139.686	140.566	241.005	151.625	116.479	106.628	92.6013	132.216
BnaA02g11350D	982.054	82.6681	5.56252	5.67637	0.308535	0.521528	794.2	103.708	9.99751	11.9416	0.285495	0
BnaC03g22490D	0	0	0.286766	6.28395	191.579	342.345	0	0	1.27188	25.2921	419.475	1009.68
BnaC09g32660D	393.647	138.817	88.5495	112.773	98.5128	117.986	365.897	170.067	135.387	148.484	102.336	121.598
BnaA02g21680D	159.35	146.507	115.405	156.029	172.227	280.274	123.256	104.783	85.199	127.343	179.746	343.507
BnaA09g33290D	159.085	251.603	332.641	216.185	84.3975	96.6556	154.78	210.506	225.204	153.44	61.006	43.8347
BnaA09g33330D	63.606	119.94	492.876	359.229	64.8524	114.407	73.1285	119.322	262.44	198.308	64.2029	52.0097
BnaC08g15160D	196.14	194.55	160.092	174.518	176.576	132.594	158.159	169.004	145.528	168.525	182.726	125.025
BnaC01g15350D	176.528	187.279	180.69	184.271	136.547	167.482	183.954	169.254	141.041	145.304	117.555	191.927
Novel00495	82.8117	98.7707	566.249	306.556	85.7744	107.466	71.7734	74.8558	222.96	229.328	85.1025	49.5534
BnaC03g33700D	196.325	172.377	287.622	200.72	103.858	123.961	216.859	162.338	163.24	163.591	84.968	100.621
Novel01219	866.875	10.3907	0.522519	0.318057	0.0328467	5.10803	1069.9	19.4973	0.412002	1.02411	0.121575	1.39946
BnaA02g03770D	102.952	167.801	177.939	147.956	94.3934	118.108	138.654	316.796	282.091	214.74	104.438	107.099
BnaC03g68420D	143.734	277.899	218.127	161.855	84.8703	92.4226	167.233	298.327	260.335	166.371	67.8426	32.2734
BnaA04g00470D	134.571	115.602	170.311	239.112	267.83	170.689	147.43	110.556	131.787	149.839	209.655	123.452
BnaC09g43670D	113.611	125.346	232.107	230.276	159.271	149.897	97.1478	120.712	189.034	229.099	180.603	139.717
Novel01712	94.1143	165.746	222.904	252.51	124.466	146.914	111.827	201.48	237.126	191.563	108.218	108.259
BnaC04g06760D	459.138	298.061	135.078	103.914	31.8202	36.3602	515.56	228.497	33.1674	48.7764	30.4337	42.3508
BnaA03g26670D	0.189985	1.58264	19.1971	124.874	300.874	602.052	0	1.1463	19.6319	91.9073	238.371	562.82
BnaA02g02540D	170.869	212.836	280.228	156.707	109.876	101.424	189.959	224.187	167.255	132.896	104.37	109.817
BnaC09g06910D	255.237	212.587	424.576	118.292	42.4209	70.4417	313.505	209.823	189.942	90.996	19.8153	10.8616
BnaA06g36450D	113.956	115.141	256.8	244.865	169.473	152.511	122.587	108.614	172.808	193.609	176.273	131.833
BnaC03g52670D	165.973	179.215	271.373	209.896	112.83	122.693	170.203	167.314	157.006	165.678	113.172	121.841
BnaA07g30640D	0.0410683	2.69779	168.868	259.574	265.899	280.472	0.043858	3.01855	96.7428	192.106	306.486	381.191
BnaC04g32420D	357.766	288.234	178.655	111.105	89.4943	80.5109	326.862	170.559	85.9089	103.379	82.3142	81.5969
BnaC03g57750D	85.1081	130.904	235.657	180.033	128.217	106.956	76.9018	128.86	254.374	285.764	213.398	129.958
BnaAnng15460D	140.977	228.932	213.193	171.435	140.44	116.199	175.731	253.983	185.435	132.687	103.829	88.7091
BnaC02g39900D	234.152	227.071	267.467	147.056	98.9975	82.6596	207.989	187.145	144.07	152.954	104.089	92.7057
BnaC03g13880D	191.846	273.254	235.993	133.354	86.0431	92.2247	209.033	251.83	202.016	118.026	67.4921	85.0375
BnaC08g43440D	130.937	171.652	172.185	138.103	95.3069	96.0587	209.638	251.89	208.029	205.628	135.641	129.078
BnaC01g05300D	54.3074	180.064	44.7684	116.539	135.813	437.051	47.5494	125.415	95.2076	223.477	155.812	327.291
BnaC05g04670D	264.059	209.335	246.799	143.546	119.607	101.481	273.176	163.703	137.648	115.086	89.4306	77.97
BnaC07g11440D	236.13	175.146	301.498	156.015	81.8498	95.1416	213.838	147.826	175.601	146.356	100.392	109.857
BnaCnng67420D	293.377	209.704	225.282	133.432	77.2879	102.35	292.889	171.004	128.678	127.502	83.5071	87.9808
BnaA10g20420D	169.135	321.505	156.033	162.642	116.917	94.5366	158.984	243.443	190.868	176.775	98.0396	43.8561
BnaC04g09150D	312.482	180.27	244.241	196.811	125.086	98.9125	346.64	107.206	96.8176	85.3426	76.9043	61.7724
BnaAnng31190D	96.2456	132.782	300.546	179.795	78.2135	91.8789	198.929	254.455	194.192	189.368	94.1615	121.826
BnaA08g26210D	254.235	214.181	248.184	178.656	124.485	101.164	213.598	142.356	124.327	140.972	94.2703	95.5763
BnaC08g42970D	156.999	101.878	65.3421	80.5234	167.83	106.49	238.516	144.938	121.692	135.396	346.504	265.203
BnaC06g22280D	252.93	198.894	176.233	170.435	104.431	118.573	287.398	207.491	138.444	123.608	69.2439	83.1397
BnaC05g01420D	249.151	216.305	269.212	158.417	82.7948	91.1239	222.407	173.659	149.026	145.45	87.5931	85.2742
BnaA10g25030D	265.771	194.897	218.512	188.499	120.164	145.256	222.937	124.109	117.677	125.646	85.7187	119.541
BnaC05g43760D	798.147	292.041	2.84846	2.08062	1.07436	0.484276	537.688	226.414	46.0427	16.5175	1.78944	0.696559
BnaA01g05320D	266.365	261.474	71.9892	114.394	141.615	154.242	230.915	214.997	94.7073	141.355	127.742	105.695
BnaC04g07790D	282.191	193.278	242.912	139.921	80.9289	66.7187	300.018	152.612	138.019	145.854	100.997	80.1844
BnaC06g06810D	0.0568967	0.135419	78.0952	251.387	305.71	434.265	0.182285	0.0312086	38.1256	190.615	259.249	364.126
BnaA05g09350D	159.883	143.812	224.882	196.069	108.853	118.356	222.74	195.396	182.499	154.727	106.255	106.283
BnaA02g15680D	354.82	305.782	138.463	103.304	63.1961	83.6005	275.213	241.003	102.106	99.9289	63.0358	88.1942
BnaA06g38880D	183.854	100.399	115.684	220.617	220.602	161.565	176.595	87.6483	85.2476	141.544	239.86	185.021
BnaA06g23230D	47.5768	103.718	238.765	232.329	213.172	176.795	57.9486	98.7541	188.663	188.255	207.657	164.19
BnaA10g19870D	231.868	326.281	214.612	129.822	73.1004	79.8679	237.015	259.923	155.381	97.4247	52.6864	59.6389
BnaA03g50690D	284.795	187.021	258.58	176.408	94.9962	83.7373	298.41	161.68	103.93	114.842	81.8468	66.4786
BnaCnng01630D	308.081	207.912	312.758	200.528	107.346	102.293	287.153	136.135	113.86	72.0601	26.4683	37.0521
BnaC07g47340D	239.086	208.551	288.915	162.814	98.9016	92.6582	239.771	154.742	122.134	128.687	96.0088	78.2101
BnaA06g36920D	214.431	285.655	76.4835	66.9771	70.2134	157.363	240.031	290.192	164.954	111.857	81.7078	150.058
BnaC04g27310D	231.435	229.925	237.417	148.33	115.285	97.8412	264.9	196.625	138.428	97.6843	80.0068	71.2743
BnaA06g37360D	207.622	315.372	411.674	158.204	86.8034	40.3657	133.521	222.225	193.17	80.8361	51.2306	7.98828
BnaAnng24190D	65.6868	52.271	204.675	308.689	201.433	213.61	58.0281	40.6214	109.604	240.086	203.743	208.859
BnaA05g07770D	109.724	247.669	223.2	176.75	78.8571	93.3099	145.339	243.416	209.255	201.874	98.0335	74.0491
Novel00366	49.5509	574.721	136.486	105.654	22.4176	24.0721	43.0967	640.734	219.822	68.1245	13.4589	2.71213
BnaA09g24910D	162.724	179.945	364.356	266.285	74.5786	107.207	154.577	130.327	168.748	179.902	55.2075	56.5374
BnaC05g05890D	90.7546	161.656	178.59	201.69	134.583	203.048	93.5092	158.805	275.48	219.394	103.663	78.9005
BnaA09g44820D	0.0407618	0.0388066	25.7126	163.425	345.855	522.05	0.0870613	0	22.7146	111.266	237.019	470.832
BnaC02g05070D	61.6376	221.338	156.797	131.131	65.8927	125.487	68.2342	336.551	299.231	258.638	97.2357	76.7513
BnaC06g14990D	442.77	221.199	96.1867	84.7646	86.2605	140.936	333.8	110.029	58.6426	72.0417	75.3652	170.03
BnaC04g39990D	326.254	234.104	254.608	125.702	63.4039	65.8429	275.502	172.847	149.358	118.172	52.3526	52.0812
BnaA03g29570D	296.538	252.12	249.459	125.723	64.628	68.0174	246.872	205.083	130.847	120.395	62.6753	67.4089
BnaA03g58750D	0.348643	91.7207	272.802	411.831	45.6352	243.354	0.620544	54.0559	207.328	428.771	69.1155	63.1942
BnaA03g05300D	205.959	203.644	244.007	152.117	90.6718	104.574	248.585	190.777	147.818	122.899	82.5512	94.1129
BnaA09g13470D	238.6	305.791	193.906	111.826	37.1257	28.277	348.422	294.341	152.004	123.846	38.4269	13.3196
BnaA09g48720D	253.826	231.319	198.172	181.245	169.797	148.98	160.201	127.674	105.963	90.3038	109.305	107.37
BnaA07g20560D	203.289	203.985	185.732	119.693	120.11	135.782	177.645	165.163	130.406	105.494	113.519	223.102
BnaA03g31080D	254.188	241.577	167.864	142.868	125.255	117.76	217.9	165.043	116.236	141.089	107.532	85.4944
BnaC06g36600D	471.29	251.273	160.459	116.731	71.6771	82.865	298.641	157.051	96.0394	88.561	43.3	44.0294
BnaA05g22420D	367.944	345.022	44.8974	57.0759	92.8394	69.0591	340.161	255.886	87.7237	72.3366	80.9196	65.7395
BnaC08g32090D	169.048	215.705	283.49	157.738	82.1737	85.5636	207.925	220.037	193.917	125.11	72.7252	65.4589
BnaA03g09320D	415.223	203.004	279.64	89.1787	34.4787	47.4591	383.415	164.32	126.864	86.0793	27.1934	21.9684
BnaC09g07990D	126.53	109.093	390.305	324.072	45.7104	99.2751	132.988	115.198	256.347	235.737	27.284	13.7555
BnaA04g05120D	142.957	239.03	212.46	194.473	99.2123	84.6444	169.176	234.107	203.167	174.412	83.2435	38.8366
BnaC01g01140D	36.6291	213.568	168.037	173.069	141.793	155.779	40.8227	216.235	274.671	190.631	118.373	145.855
BnaA03g42680D	921.155	146.183	16.8792	21.9568	0	0.0540228	682.451	79.7348	2.05449	4.94793	0	0
BnaC07g01360D	275.685	200.388	132.936	114.405	111.043	69.7205	295.33	224.301	150.088	123.511	113.403	62.9207
BnaA06g12310D	153.286	174.897	223.954	181.225	117.979	108.586	197.954	207.74	185.907	132.357	99.8093	88.9819
BnaA09g39850D	265.373	221.444	197.699	152.903	97.3735	86.3651	260.605	180.499	111.843	126.382	84.4493	87.4449
BnaA09g39760D	199.539	204.515	259.664	161.351	96.1105	103.157	218.483	202.364	146.233	124.291	74.6984	81.4004
BnaC09g32930D	411.626	201.61	197.169	90.0603	73.3806	58.7959	422.948	127.699	94.4344	82.8166	57.953	50.8831
BnaAnng39120D	354.911	195.003	140.275	102.127	108.387	83.2588	291.39	126.832	106.528	121.919	130.364	107.988
BnaA05g00350D	141.269	164.473	260.007	186.733	102.188	128.15	157.45	162.738	159.649	168.668	107.674	126.943
BnaA02g21980D	188.456	198.99	259.083	177.581	104.717	105.627	185.523	158.866	142.868	143.366	93.4138	105.906
BnaA07g24400D	0.0405349	0.057886	63.3082	250.431	293.209	274.037	0.0649326	0.0222339	49.7733	262.144	363.341	307.075
BnaA08g01740D	0.0849028	0.565813	0.363658	1.56963	90.6516	486.605	0.241787	0.0310469	0.684269	15.8861	260.733	1004.52
BnaA01g32020D	377.685	210.5	175.082	81.4051	45.8853	35.9785	291.967	220.827	162.837	172.835	58.0467	26.5993
BnaCnng37660D	828.453	156.639	22.9179	10.3437	1.10506	0.553458	689.616	116.539	16.0427	11.7487	1.93146	0.113724
BnaA03g37360D	148.062	247.602	51.7424	79.7247	57.031	66.1371	242.106	554.651	237.266	103.834	40.1029	24.0458
BnaC04g28820D	231.797	186.309	237.974	162.484	111.21	99.1555	245.537	137.255	124.301	125.931	106.385	82.0198
BnaCnng23240D	805.995	125.4	4.1926	3.95356	0.691295	0.535573	800.613	92.7314	6.50327	7.50194	0.199897	0
BnaA10g11590D	451.433	160.789	65.6208	75.4665	70.435	83.3725	381.251	167.226	101.12	107.067	81.0613	100.421
BnaAnng14520D	81.0053	144.181	148.773	148.346	133.579	170.29	103.156	195.273	230.015	153.133	138.703	197.665
BnaC02g11500D	0	0.0495247	0.789972	8.54442	110.015	647.316	0.222214	0	0.539036	16.5714	105.617	952.946
BnaA04g28190D	199.422	184.869	194.541	170.136	109.032	123.144	224.991	190.645	160.684	111.679	92.3691	80.1754
BnaA07g32440D	178.803	171.909	186.162	126.624	62.1107	72.9833	239.157	241.444	177.565	191.388	90.2205	102.435
BnaC04g56900D	197.425	168.456	227.852	181.288	127.612	113.384	200.321	147.672	137.856	130.219	116.324	90.846
BnaC04g12040D	0	0.426237	45.6052	120.24	182.761	328.657	0	0.589381	32.4747	178.888	371.265	578.35
BnaA06g05150D	327.796	212.694	113.015	137.229	149.742	134.622	276.558	119.058	72.5879	91.403	102.028	99.7946
BnaA09g33020D	865.149	251.712	22.5043	25.586	2.03258	8.06254	527.66	102.593	8.83825	10.3145	0.90278	10.2413
BnaA06g29060D	248.892	164.152	247.032	155.817	106.051	81.8643	242.553	137.996	142.952	129.464	103.283	72.5253
BnaA09g16170D	145.747	171.285	232.004	189.531	119.025	132.207	170.456	166.146	173.779	129.296	100.703	102.1
BnaC02g14410D	186.81	178.339	195.013	201.516	135.995	149.248	235.36	133.192	123.496	134.838	82.7972	75.2471
BnaA03g13080D	207.823	178.648	243.284	167.819	68.1214	104.104	230.878	153.957	127.094	161.71	77.6706	109.832
BnaA03g21840D	142.751	144.773	212.319	229.456	180.124	112.72	168.623	139.912	128.862	145.4	164.828	60.0323
BnaC08g13790D	160.883	169.87	284.611	168.135	98.5964	134.611	162.266	132.115	132.559	150.694	94.2028	138.67
BnaC09g50430D	386.815	313.305	115.43	49.6512	32.1332	13.8679	440.93	267.054	95.7606	66.301	29.9867	15.7042
BnaC05g47950D	371.558	191.103	93.2357	138.216	56.2536	117.122	318.561	128.754	137.488	191.788	52.2616	30.5789
BnaA10g21870D	403.664	248.09	290.408	102.148	11.2151	41.2058	387.364	147.183	116.006	68.4519	7.35079	2.59688
BnaA07g38870D	167.504	175.813	273.712	161.536	101.502	83.5722	226.182	168.919	136.898	134.032	111.116	82.8668
BnaC08g20590D	198.615	190.648	234.724	184.749	110.401	119.665	179.806	137.218	105.258	141.819	97.425	123.221
BnaA01g16170D	119.399	152.262	227.461	177.225	141.861	132.862	130.068	150.011	149.717	152.064	134.393	154.465
BnaA05g22070D	149.587	207.461	204.569	156.008	143.951	122.911	169.697	195.863	149.888	110.201	114.178	95.1423
BnaC05g02380D	229.275	198.171	235.577	164.745	83.9382	97.9588	216.497	156.229	131.797	130.073	77.4676	96.1167
BnaC08g12430D	231.228	193.133	221.416	154.025	103.124	121.8	193.516	160.313	136.808	133.68	90.637	78.1124
BnaAnng05900D	367.822	219.065	78.2631	91.3935	56.4083	50.947	426.12	257.485	93.7134	81.7335	63.6521	31.1157
BnaA01g31930D	800.091	118.351	5.81518	4.86708	0.152315	0.343284	695.838	161.861	11.9407	14.9019	0.845642	0
BnaCnng08430D	137.407	162.152	106.583	137.234	150.829	197.265	154.146	141.933	87.5504	122.449	158.736	257.933
BnaC01g33070D	181.843	222.827	216.643	179.52	142.446	88.8862	164.199	196.437	147.663	121.956	108.748	42.0811
BnaC05g50130D	141.231	173.405	228.428	184.846	117.308	117.392	165.186	174.7	165.813	141.686	104.645	97.4184
BnaA10g10660D	0.229324	0.33741	1.09589	51.3199	254.182	324.01	1.40262	1.09778	9.93719	123.122	437.594	607.548
BnaC09g39920D	104.036	230.555	142.971	132.182	113.212	115.771	98.2186	275.931	246.575	176.656	104.264	71.2782
BnaA03g06050D	153.857	212.28	185.215	155.172	127.638	109.111	199.198	163.745	128.831	152.34	123.414	99.4712
BnaC09g36510D	0.0540132	2.19831	53.7574	78.9968	124.092	302.89	0.216308	2.0887	42.0235	96.0903	243.083	863.795
BnaA01g14450D	50.9454	30.0342	316.582	253.61	19.3425	93.9043	106.686	97.1047	394.605	347.479	59.1574	37.9136
BnaA10g25520D	141.296	170.654	296.951	241.279	108.12	95.0171	181.806	158.33	144.871	124.08	72.1697	71.832
BnaC03g30020D	4.65996	12.0729	29.6271	75.6939	349.626	440.928	19.1718	22.6273	26.5623	47.1333	346.097	429.275
BnaC07g19610D	191.537	181.628	236.931	158.881	87.7729	99.0237	218.612	181.459	174.758	123.762	71.9399	75.476
BnaA08g15140D	227.678	201.017	259.459	175.222	129.992	110.52	161.886	146.169	112.275	106.441	85.3342	84.8995
BnaA03g55510D	0.0670194	1.46751	44.0766	146.323	263.615	322.855	0	1.10283	23.8433	140.162	396.053	460.84
BnaC03g17190D	313.641	370.897	141.9	64.056	29.1184	37.9588	247.367	311.176	142.852	76.494	33.0046	29.6736
BnaA03g14210D	207.168	338.758	153.828	74.1491	37.7453	38.7602	212.931	376.837	188.682	97.8406	39.0826	30.4363
BnaC02g48590D	124.7	207.392	138.328	81.0654	92.6451	48.8771	139.69	303.127	254.427	151.901	149.694	103.145
BnaC08g01540D	144.423	242.854	139.342	163.953	83.5947	101.235	179.486	252.299	231.668	161.147	59.3713	34.3347
BnaA08g23680D	14.2132	38.134	11.3889	8.14351	33.9544	396.523	10.3222	23.8393	19.0112	21.5812	68.0372	1148.08
BnaA08g09140D	345.529	242.249	92.6412	125.72	80.9724	110.126	377.702	140.763	70.5313	81.6947	52.9648	71.5493
BnaC06g01490D	78.0012	204.769	245.651	150.83	113.505	98.06	65.3024	197.591	246.335	229.076	108.695	54.5015
BnaC04g12030D	0.0314817	0.509519	60.2382	164.867	210.904	312.655	0	0.656189	47.1929	163.331	339.74	491.951
BnaA03g24100D	437.573	165.247	122.041	86.184	28.8406	11.8379	425.724	203.539	120.185	139.019	32.2541	19.5479
BnaA04g09660D	10.9242	23.4135	193.789	217.573	227.415	222.407	14.0698	16.9825	98.0287	198.667	273.993	290.217
BnaA02g04260D	134.926	148.283	210.813	169.231	123.965	111.551	168.512	163.729	152.048	154.666	128.217	120.068
BnaA06g24570D	322.443	248.886	134.317	93.2119	89.7947	68.7352	273.578	185.483	106.059	108.972	94.8253	57.9336
BnaA06g01410D	1.23962	2.13904	116.207	356.238	215.055	299.276	0.330957	0.764942	70.4697	270.847	245.428	204.008
BnaC09g03320D	233.653	167.438	243.791	135.014	97.8596	88.1704	213.918	150.852	134.836	141.998	80.9478	92.5928
BnaCnng06690D	245.276	260.661	302.236	94.0704	26.8522	57.3791	286.743	261.001	164.434	67.8159	8.79023	5.63113
BnaC03g27400D	0	0	0.733396	13.5264	59.1961	490.8	0.268189	0	1.8794	30.6319	136.683	1047.11
BnaA01g33230D	218.104	284.705	280.212	153.816	107.042	97.1781	122.009	144.558	108.044	110.951	78.0946	71.6682
BnaC05g43870D	149.712	158.585	186.706	184.547	147.463	134.505	152.052	130.377	154.56	148.729	124.719	104.119
BnaA03g22060D	203.708	190.47	242.951	145.942	55.3048	108.13	248.58	218.633	140.61	120.992	39.6124	59.4397
BnaC08g37400D	0.125565	4.24375	207.918	346.197	255.802	218.748	0.402283	3.58145	159.532	229.442	208.928	139.376
BnaC01g31510D	128.39	140.521	188.529	205.695	151.051	152.405	134.028	138.706	177.95	143.19	102.495	111.216
BnaC03g27200D	238.949	187.467	141.018	167.988	137.083	103.844	201.132	161.103	106.829	128.221	112.189	86.197
BnaA03g18930D	0	0	0.430149	3.53472	169.001	263.12	0	0	0.989242	37.3568	413.72	882.83
BnaC05g11560D	350.245	204.804	181.404	127.808	79.2317	71.1364	291.297	124.45	91.7191	116.431	70.0604	62.0688
BnaAnng36820D	152.938	298.909	255.222	134.855	89.8007	111.24	97.4345	190.192	173.756	96.7862	88.0433	80.0785
BnaA09g38330D	206.96	182.929	268.682	135.668	87.2794	89.4385	194.97	166.464	129.307	123.608	91.896	89.9992
BnaCnng48720D	156.984	208.196	255.281	161.395	91.1377	94.9809	157.062	183.811	147.203	142.664	79.4349	88.5404
BnaC05g18830D	225.806	243.376	196.815	134.248	62.4121	58.8582	213.71	227.303	158.117	130.292	73.5964	39.3135
BnaC06g20720D	228.207	183.317	178.655	135.977	169.782	91.3419	213.71	128.006	89.2865	100.651	167.381	77.1573
BnaA07g34980D	126.851	147.983	231.826	219.147	108.056	103.958	153.866	165.631	189.695	144.396	101.483	68.2559
BnaA10g02510D	209.708	172.086	247.412	176.873	83.5724	102.55	192.652	135.361	128.112	135.659	75.7497	100.304
BnaC03g23520D	98.8579	125.28	177.573	157.316	142.056	151.792	169.799	193.312	156.93	134.35	138.411	114.206
BnaA03g43030D	130.506	154.056	275.353	193.589	130.109	106.375	165.76	168.098	161.086	125.563	91.8727	55.1287
BnaA09g44520D	163.165	209.641	245.99	154.791	74.3988	84.9935	161.391	189.043	170.305	146.213	80.688	76.4496
BnaA04g29210D	188.813	138.926	141.475	118.241	107.701	86.0457	345.378	196.184	125.154	123.458	96.4971	88.334
BnaA06g30390D	45.7865	111.749	176.066	175.211	154.055	195.339	51.8048	114.387	200.11	178.078	156.558	196.797
BnaA03g04080D	345.236	342.441	66.808	59.7996	37.6911	31.5064	354.619	272.638	97.6607	91.1282	40.6074	13.6034
BnaA01g33650D	236.319	255.547	255.048	134.349	103.712	89.0146	206.103	157.75	120.727	87.8293	52.9447	54.2084
BnaA05g09830D	320.341	101.498	4.84449	96.4484	78.7706	222.229	405.617	117.954	6.63813	107.447	74.2286	215.779
BnaA06g04140D	15.7416	28.0353	249.753	287.524	140.134	152.273	10.8691	36.6222	223.036	389.389	146.613	70.8846
BnaAnng01090D	168.089	216.354	243.671	142.624	93.54	96.6007	179.166	193.495	143.402	124.646	63.0672	84.0345
BnaA02g29320D	451.5	360.479	117.18	54.0021	29.402	26.0583	346.74	217.798	57.7472	53.6595	20.2354	12.0172
BnaA03g10790D	150.909	291.981	196.069	107.938	62.2533	75.3318	146.881	263.421	210.04	114.746	55.5361	71.0877
BnaA03g20980D	248.229	219.907	199.411	139.397	79.3008	64.5312	224.61	175.141	139.716	120.483	69.8911	62.17
BnaC07g40370D	259.275	224.355	256.844	162.043	103.218	63.4094	226.716	141.315	117.124	88.0897	57.1517	40.6501
BnaA09g48380D	100.138	176.049	224.922	201.424	140.616	123.118	117.338	171.222	179.852	134.274	99.2942	71.0423
BnaA01g23850D	192.202	194.514	278.709	142.689	63.1289	71.1395	186.321	163.522	146.464	141.648	91.2527	66.9504
BnaC01g22620D	235.565	229.088	199.885	127.425	94.8407	87.7684	302.579	183.357	113.198	67.624	51.9263	44.6811
BnaC05g38240D	248.525	417.537	237.957	74.8779	188.633	37.0899	111.515	133.764	60.1131	62.9717	123.951	39.8268
BnaC07g28280D	174.927	168.054	268.421	158.87	98.0186	85.0829	159.522	139.643	138.946	148.356	103.793	92.9861
BnaC09g43600D	168.221	254.927	205.316	127.31	70.0811	88.8323	202.919	240.154	161.923	105.633	49.6513	61.6336
BnaA06g09940D	352.262	200.963	168.839	106.835	78.3061	63.0006	293.63	151.368	100.814	106.878	69.0326	44.2369
BnaC03g35930D	224.084	152.382	208.619	165.628	108.296	99.0375	272.606	137.059	123.705	113.893	72.5138	56.4301
BnaC03g15950D	229.848	174.539	260.264	153.161	77.5342	87.8102	197.479	130.182	120.095	140.427	65.4588	94.5523
BnaC03g18820D	121.506	87.4204	14.0853	116.295	131.794	442.354	171.912	79.7055	23.2565	95.3172	83.7172	363.893
BnaA01g32090D	159.286	133.516	172.792	179.653	154.964	119.289	187.763	120.003	130.364	128.319	151.366	93.5272
BnaCnng19790D	118.187	157.711	205.41	169.2	119.457	115.028	141.291	159.354	150.566	144.179	134.391	115.757
BnaA06g19240D	0.0277968	0.0529271	20.5541	109.162	188.055	374.739	0.148425	0.182963	12.9616	116.003	295.441	611.753
BnaC07g45990D	200.768	194.11	239.455	153.404	90.0373	82.3531	214.361	168.656	139.712	112.935	73.4691	59.8126
BnaC02g17510D	267.983	157.79	183.241	182.237	124.841	66.5274	284.911	135.383	98.0653	100.462	85.9428	39.878
BnaC07g30010D	652.455	125.605	21.7283	9.71707	4.55297	3.45538	720.062	141.866	30.4968	10.9888	4.34194	1.89335
BnaC07g44800D	8.62434	131.371	292.497	237.782	77.1052	56.3799	11.3592	163.204	309.142	340.101	72.8124	25.956
BnaC03g41850D	189.08	196.534	373.172	189.799	65.7871	65.8978	143.047	130.705	177.848	136.864	45.7858	11.1449
BnaA08g27220D	196.283	174.071	239.226	155.604	95.6528	98.7298	169.456	141.49	135.049	136.939	87.1245	94.2441
BnaC09g50780D	157.324	186.292	284.842	188.72	78.4331	93.5325	144.423	148.183	141.474	139.094	71.2757	90.1358
BnaA04g18250D	208.469	194.57	247.778	145.32	74.8711	78.3451	173.859	145.973	140.1	161.71	74.3832	78.1694
BnaC01g16050D	270.967	350.712	139.225	64.9397	36.4056	32.1941	231.85	322.012	142.616	77.6364	32.8617	20.0961
BnaC03g23230D	8.19312	179.186	325.939	213.368	97.5162	85.0308	5.83311	169.899	254.171	247.281	97.8889	37.1498
BnaA05g23860D	0.0949927	0.0452182	1.44256	6.07904	40.4408	313.996	0.253613	1.0942	5.46848	29.1359	138.065	1183.59
BnaC09g37340D	364.851	227.631	139.221	85.9407	47.5886	38.7421	317.444	197.512	122.844	100.382	52.7414	23.1279
BnaC08g13710D	209.678	174.03	154.138	117.221	123.975	97.3013	275.393	160.805	113.35	92.0471	100.209	98.9536
BnaA06g15400D	24.3504	33.3958	430.476	100.991	439.361	93.0709	23.5071	41.8905	100.055	75.4129	339.812	14.5151
BnaCnng10190D	83.5551	117.213	253.928	185.951	101.222	91.7114	84.4224	132.959	189.258	211.796	144.595	116.947
BnaA03g09180D	221.924	198.175	141.201	141.333	142.469	92.0706	224.866	159.209	99.8026	122.123	113.737	56.5049
BnaA05g05230D	159.98	190.863	230.366	138.478	37.0209	78.3346	188.611	186.275	304.271	127.429	36.0022	33.7843
BnaC04g50740D	432.518	256.579	81.457	74.7928	66.9372	69.585	319.389	149.478	63.5654	92.5715	49.8709	54.1898
BnaA08g11330D	262.916	236.049	227.549	98.3176	86.2579	42.5075	215.891	187.706	122.525	112.07	93.9534	23.6674
BnaA05g25510D	140.758	189.107	155.949	178.355	132.164	166.154	151.551	173.235	150.635	98.4531	73.7842	98.9964
BnaA01g31350D	202.369	156.118	172.662	138.981	110.888	89.7489	220.176	154.535	145.371	130.225	107.898	80.1697
BnaC03g12390D	324.101	167.124	167.979	126.551	53.6117	52.8292	329.022	189.788	145.015	88.5721	44.923	18.9243
BnaC07g17470D	125.829	121.655	188.293	167.72	127.865	145.517	137.354	125.297	146.462	143.496	132.674	144.855
BnaC01g37340D	111.708	194.584	200.335	139.693	72.5852	100.167	173.237	270.866	188.122	107.389	60.6998	85.3247
BnaC06g23750D	0	0	76.9503	210.603	322.218	326.402	0.131574	0	39.1038	142.45	267.683	318.176
BnaC02g39030D	0.282643	113.164	152.984	254.509	201.305	121.564	0.573501	91.3612	281.456	331.051	129.492	25.8367
BnaC08g08250D	955.181	58.111	1.43562	2.3303	0	0	647.767	32.9562	2.04385	3.23419	0	0
BnaA09g43450D	127.813	154.963	103.492	122.341	91.3895	196.074	108.263	127.091	65.7175	148.644	134.335	321.364
BnaA10g19670D	40.8001	181.163	125.226	117.044	66.3022	102.314	54.4129	372.203	264.826	196.502	95.4287	85.1913
BnaC02g08760D	211.753	169.607	191.188	156.671	95.5644	96.1288	220.512	142.953	123.698	118.51	85.4457	88.3635
BnaCnng46960D	253.5	186.348	201.031	113.003	96.7573	70.7707	219.261	151.032	119.228	124.937	100.056	63.9689
BnaA01g24690D	110.62	122.137	144.007	167.242	109.699	131.242	167.454	161.774	198.643	160.658	117.346	108.956
BnaA06g16870D	200.072	221.208	170.912	104.34	79.9035	70.084	253.249	244.529	144.147	114.251	68.307	27.6745
BnaC09g17480D	184.53	187.797	242.805	189.293	71.4383	72.2778	183.086	168.965	184.961	127.736	51.4585	30.7908
BnaC07g17410D	203.992	219.677	173.707	114.969	116.031	113.597	281.775	171.324	97.6682	66.4	62.3747	72.101
BnaA10g07870D	206.149	202.049	230.626	151.751	78.8928	88.5757	183.084	145.742	112.792	135.106	73.4504	84.8454
BnaA06g30200D	448.42	128.332	123.589	80.713	50.7567	41.0901	473.154	122.964	101.459	69.7018	34.6175	14.6573
BnaC03g25510D	270.249	225.434	194.84	96.2973	58.9484	34.2064	265.681	231.539	176.48	71.2649	50.5116	13.1254
BnaA07g22620D	190.322	329.811	95.0411	126.581	24.2318	39.3152	180.539	234.931	257.827	161.059	26.1118	22.3339
BnaC03g02910D	6.20544	5.78472	86.5337	223.722	214.455	212.302	5.31538	5.81476	55.9662	239.139	314.725	317.598
BnaA05g34140D	185.256	179.114	258.235	199.451	135.286	93.694	170.699	110.353	116.517	103.674	76.8575	57.5048
BnaAnng24560D	641.546	163.702	95.9567	38.1321	10.7827	7.04402	520.283	115.95	45.5731	39.6504	6.79625	0.723698
BnaA01g26560D	211.426	194.106	236.701	126.62	83.4845	74.3985	217.529	155.369	126.443	112.081	72.8163	74.464
BnaA09g15760D	77.1739	180.493	109.19	119.522	126.054	197.163	66.7044	122.547	125.167	135.314	116.192	306.845
BnaC01g19250D	215.864	157.827	257.46	142.135	79.4449	83.7373	196.961	134.979	123.936	128.082	66.8708	91.6362
BnaCnng76370D	177.111	171.682	165.545	148.884	87.229	88.0352	177.227	192.11	190.23	160.628	79.8014	39.3291
BnaA09g46370D	174.352	200.825	142.743	127.032	102.545	104.458	153.829	168.573	118.095	145.625	100.11	133.542
BnaA09g09950D	197.117	192.709	277.116	177.971	96.3218	86.9418	147.086	109.854	100.558	121.631	84.2713	79.4897
BnaC07g19000D	31.3547	102.143	362.062	272.769	79.3144	107.612	34.3533	106.046	247.054	200.96	71.6148	55.6536
BnaA04g25160D	0	0	107.269	326.357	377.665	128.482	0	0	42.3401	199.175	360.707	128.553
BnaC08g37410D	135.181	165.201	231.326	180.946	91.9962	104.75	163.42	172.599	150.128	118.596	74.0363	81.3448
BnaA03g39350D	217.302	220.371	166.067	102.344	66.5059	64.1339	218.505	215.876	154.329	111.186	78.2409	52.8632
BnaC06g27990D	239.248	185.828	250.687	148.195	106.406	85.6168	155.325	115.483	94.7991	124.663	93.5832	67.4223
BnaA08g28000D	0	58.4068	576.468	236.576	119.195	91.1843	0	44.1153	293.84	158.71	76.2457	11.3872
BnaA03g01080D	232.937	214.884	206.73	136.054	69.2352	102.428	175.173	143.44	94.6216	115.436	62.6946	112.307
BnaA10g15110D	199.687	171.077	262.661	155.715	85.4478	70.3788	190.863	146.186	126.233	121.669	71.8545	64.1624
BnaA02g33420D	0	0	41.3768	114.82	205.215	349.348	0.282817	0.290523	35.5219	98.5547	303.257	516.653
BnaAnng25690D	117.405	95.3159	349.177	275.538	73.5194	101.325	131.918	82.7034	163.093	173.722	56.6503	42.4978
BnaC09g29580D	158.29	172.894	170.005	161.713	142.375	125.769	156.202	124.023	117.925	133.709	110.297	89.2344
BnaAnng10340D	262.776	190.323	215.314	136.958	103.373	78.893	276.383	149.038	95.0174	71.7403	46.5616	35.4612
BnaA04g06420D	109.466	171.603	156.783	122.149	107.008	126.585	169.256	223.21	189.568	114.089	75.2824	95.2365
BnaAnng15590D	209.776	150.597	163.051	154.238	96.8585	93.3071	263.241	158.7	140.781	101.637	75.3494	52.304
BnaC05g34370D	247.195	162.629	263.014	152.294	83.1651	64.4387	213.192	105.524	106.297	122.155	71.9295	65.6861
BnaC09g47620D	167.835	235.35	175.8	140.47	97.1042	99.4696	159.411	180.264	167.817	117.426	55.905	59.6995
BnaCnng31050D	183.748	179.668	208.686	153.214	90.3544	76.3242	235.49	200.859	147.014	85.9869	52.1378	41.5766
BnaC06g16800D	169.897	251.859	112.262	120.426	113.765	122.322	177.359	171.716	118.211	110.551	90.943	95.4724
BnaA02g00780D	268.639	173.691	141.397	113.963	70.0013	116.891	258.19	148.445	86.4819	102.55	54.2085	119.666
BnaA10g24450D	737.431	118.219	28.5661	27.4719	11.3705	14.0573	605.787	50.7949	22.1549	24.8054	7.35476	5.72584
BnaC08g24220D	295.354	173.932	220.618	134.242	75.962	58.8975	243.058	120.429	114.124	105.478	64.0734	46.084
BnaA07g30140D	161.476	163.279	192.592	150.515	81.1909	76.6379	196.176	174.485	159.172	134.754	76.116	85.1656
BnaC04g31650D	181.965	192.915	156.05	131.273	86.4837	104.001	202.955	186.267	142.904	117.334	65.3211	80.6682
BnaCnng23950D	283.177	198.144	139.046	113.337	91.7309	95.6225	225.446	134.471	90.1661	122.143	73.602	80.4752
Novel00917	1.22964	3.00299	104.233	311.397	192.977	260.599	0.513846	0.879745	66.4166	268.697	231.095	205.354
BnaC04g47540D	180.761	220.841	145.357	107.23	105.287	142.589	147.286	138.753	134.619	91.5681	87.5085	144.536
BnaA09g19480D	611.038	249.264	57.0671	21.7785	3.65484	4.87897	481.804	158.089	36.6746	18.6797	2.80959	0.312475
BnaA09g05850D	145.312	279.981	191.368	93.5637	31.1492	64.268	167.685	271.338	219.893	79.4269	28.7811	72.4211
BnaCnng27950D	0.514078	0.611775	0.300261	4.52352	70.2152	357.179	0.13725	1.12791	0.887824	14.7631	181.292	1013.4
BnaC07g33580D	692.361	146.131	24.3757	24.3953	1.55111	3.284	632.437	89.9743	15.7219	9.95525	0.6524	2.00261
BnaA09g07890D	214.061	308.953	94.4137	103.744	57.6907	60.1424	210.243	243.716	181.2	111.112	36.7711	14.0262
BnaCnng15490D	0.164273	0.840616	2.80648	51.6652	235.975	352.808	0.0877159	1.01369	6.64338	88.223	348.972	546.856
BnaA05g17350D	223.846	169.334	182.483	138.547	80.7295	83.3307	262.702	147.404	117.085	97.0258	67.3118	63.8301
BnaA09g56570D	167.686	109.642	324.819	247.639	64.1443	66.0255	162.295	99.1453	190.211	148.076	38.242	13.7597
BnaAnng13420D	163.225	134.292	204.603	152.246	91.3995	92.3192	224.866	163.733	146.895	122.306	70.6099	64.2227
BnaC09g31730D	233.583	207.772	152.452	108.644	90.2196	76.3564	271.901	199.575	103.806	75.2633	59.1849	51.4153
BnaA07g33930D	195.519	175.133	153.785	102.95	60.1642	59.6826	229.833	206.529	174.938	128.943	88.0178	54.1791
BnaAnng37270D	7.97637	73.8743	209.089	148.048	130.356	237.188	16.6197	157.981	157.219	112.17	136.704	241.076
BnaCnng49050D	244.626	157.079	93.4639	104.542	119.084	92.2062	271.541	162.322	83.879	106.171	114.184	78.0915
BnaA08g05690D	150.577	206.746	110.97	127.227	98.3344	119.306	178.711	185.468	170.142	132.59	73.2905	73.7281
Novel01811	0.241685	30.8324	574.362	331.81	45.7355	65.6387	0.619445	30.9147	245.595	233.263	55.3266	11.0956
BnaC03g32720D	178.049	140.114	214.191	154.22	153.001	99.9089	174.507	96.5385	92.1477	99.8108	127.039	95.1964
BnaC06g27870D	158.441	175.083	290.818	187.256	92.4177	114.493	128.592	120.246	111.306	101.695	65.4663	78.4755
BnaC06g23120D	202.532	142.749	212.082	147.86	92.1099	66.5987	195.745	132.249	116.648	136.351	101.292	77.7187
BnaA03g10950D	3.73572	196.876	119.379	155.243	151.938	155.586	9.39947	170.323	216.522	206.385	148.005	89.4483
BnaC07g35100D	190.439	162.057	245.984	170.599	107.398	86.7216	171.859	124.134	112.728	109.383	77.4415	63.626
BnaA06g28630D	277.459	160.829	201.175	124.511	55.2095	75.5977	261.918	138.013	120.678	111.527	46.2109	48.5133
BnaC04g25470D	191.904	182.331	193.878	156.469	48.1788	81.8922	179.081	154.991	170.589	153.561	55.8029	52.4778
BnaA09g31000D	185.111	233.147	170.101	135.913	65.8501	58.7837	183.262	218.216	141.255	131.713	56.9562	39.7421
BnaA03g55890D	109.01	207.839	186.251	162.042	103.616	128.674	109.965	167.238	153.825	129.47	78.7648	81.936
BnaA09g15320D	115.894	183.337	179.882	113.453	159.281	148.027	123.094	117.229	121.744	96.6112	107.917	151.671
BnaC04g28070D	219.669	176.642	228.908	153.095	74.529	74.2106	215.509	125.043	118.56	108.709	61.1091	61.0812
BnaCnng32900D	244.554	138.839	187.189	138.674	88.5116	75.8679	278.415	129.178	123.615	99.2878	57.6524	54.9726
BnaA03g23200D	0	0	2.64022	29.7314	78.421	507.165	0	0	2.02397	42.5278	109.807	844.069
BnaA07g24130D	156.599	176.634	148.787	109.02	74.9289	90.8135	264.476	210.92	134.817	91.3266	63.7363	93.738
BnaA09g03960D	66.2111	100.197	161.225	234.024	165.525	298.479	80.6676	47.6441	67.6425	112.802	98.9865	182.261
BnaA05g33020D	154.67	111.739	264.248	148.912	85.9908	78.3819	197.33	134.017	142.647	151.77	70.2003	75.2963
BnaCnng03590D	110.145	116.654	227.64	120.552	65.8964	43.3484	157.999	198.964	253.977	175.767	106.389	36.3308
BnaC03g08430D	787.339	155.242	6.12117	10.7042	0	0	577.905	65.6689	5.21507	4.20708	0	0
BnaA05g31670D	216.91	185.539	201.727	126.395	68.6354	62.3748	205.325	176.31	140.868	111.36	57.6311	58.3103
BnaA08g24930D	42.6517	188.922	429.105	187.64	64.9774	64.1434	28.9119	139.953	242.254	173.24	37.082	10.6604
BnaA07g21710D	264.607	165.536	196.946	140.336	68.0524	72.3186	240.454	121.572	114.944	136.052	52.5167	35.1066
BnaC01g13740D	203.849	184.848	148.478	147.292	91.3437	119.479	193.703	141.699	116.678	114.56	69.3267	75.351
BnaC01g09100D	169.324	139.752	204.496	134.866	126.345	102.037	170.91	112.8	94.6458	116.269	113.987	120.783
BnaA10g27260D	223.171	275.072	336.511	177.02	86.5039	50.2885	100.862	93.2777	126.27	78.843	42.8275	14.9623
BnaC06g10450D	0.0626026	0	0.109694	1.43557	139.774	620.911	0.0334276	0	0.0360387	1.51979	154.189	682.045
BnaC08g30890D	62.1939	91.7886	256.825	239.847	82.9453	103.201	63.5021	106.043	232.871	204.034	88.4574	67.3215
BnaA09g29060D	179.361	205.794	224.755	129.259	74.1524	95.2571	163.983	147.03	118.622	107.779	70.9115	81.5671
BnaA03g21620D	128.048	176.606	256.756	180.598	66.1807	91.7427	119.616	160.572	147.826	132.97	60.6043	76.4628
BnaA02g31580D	98.4177	156.353	156.196	147.603	91.0375	117.766	108.796	193.193	190.567	136.252	86.2822	114.824
BnaA03g19390D	5.68967	132.494	241.796	174.651	92.6279	85.4546	6.07616	223.204	247.882	214.4	112.967	54.796
BnaA06g29960D	117.965	146.5	174.707	174.521	126.215	96.8692	154.85	159.587	142.696	145.19	101.971	50.5131
BnaC09g04880D	650.534	87.1015	12.4421	4.80624	3.30903	1.86446	735.993	74.9005	11.6342	7.27694	0.695893	0.139312
BnaA07g23790D	153.581	181.799	209.182	133.421	93.9034	80.4278	178.31	166.602	134.9	97.66	73.6828	84.5705
BnaA07g26960D	127.676	110.112	76.4867	92.4837	125.518	179.243	175.577	101.565	77.7447	94.2767	155.532	269.011
BnaA04g04780D	181.328	195.984	217.855	125.724	73.7102	80.2216	192.458	172.37	119.072	98.1491	63.0721	64.6674
BnaC03g13470D	150.42	224.532	136.221	93.017	60.0971	74.6037	175.579	245.718	175.477	112.511	62.1699	72.8564
BnaA09g51640D	173.075	176.493	223.033	137.383	60.7928	53.9353	164.198	164.736	147.551	129.561	84.7535	67.6182
BnaC05g47450D	235.178	262.032	104.792	93.6069	68.4581	53.5494	257.151	213.581	114.121	90.8863	63.2201	26.4771
Novel03243	110.996	131.498	151.037	132.368	92.8813	129.58	146.407	164.278	207.254	115.241	80.9471	120.414
BnaC03g24420D	17.2875	39.9107	146.338	289.423	139.611	131.021	19.2201	42.6334	165.772	326.783	194.989	66.9254
BnaC02g28390D	178.487	181.178	60.255	76.7839	124.081	99.839	162.684	166.36	112.031	106.085	163.243	147.985
BnaA08g14150D	210.076	163.898	257.627	153.421	88.3879	82.8492	176.948	100.453	103.518	103.968	75.0836	62.3183
BnaA04g00660D	103.886	92.1853	251.299	258.872	82.4039	93.8629	113.167	108.23	204.911	182.776	53.9385	32.7843
BnaC06g20860D	259.412	139.224	195.33	122.729	42.8369	53.6965	200.97	153.077	143.887	178.7	52.1085	35.961
BnaA03g29070D	173.214	158.748	215.305	163.121	95.5889	79.0804	182.833	118.115	109.777	127.091	83.1954	68.2071
BnaC03g06830D	170.814	186.678	224.415	135.934	74.0202	93.8909	164.152	164.811	117.136	97.8752	59.889	83.9248
BnaC08g05370D	493.016	260.164	21.792	30.2491	36.6539	17.0018	401.318	202.439	45.1823	34.382	27.1077	1.88607
BnaA07g26380D	214.602	164.714	248.614	138.28	81.237	77.9857	200.754	108.891	95.0656	109.207	62.6233	68.1709
BnaC04g52530D	169.515	165.166	137.249	138.433	106.276	118.055	186.904	147.413	109.064	108.289	85.6484	98.0443
BnaA03g13420D	129.837	170.975	138.8	126.126	63.3904	106.513	134.922	177.142	179.943	146.179	74.0403	121.706
BnaCnng75660D	459.71	164.613	46.1282	48.134	16.5698	10.2254	473.247	183.592	67.4237	70.8341	21.9948	6.76005
BnaC09g17150D	57.7905	137.762	99.5761	148.662	111.694	249.555	30.2536	94.3824	129.783	231.89	120.256	157.386
BnaA07g20860D	221.124	172.232	147.383	109.345	116.362	81.6564	218.581	142.887	96.3354	88.7093	105.959	66.2573
BnaC02g12070D	201.551	171.603	235.548	147.877	78.5143	78.6464	161.383	112.75	103.764	122.684	75.2492	75.5999
BnaA03g23050D	144.227	134.544	124.865	114.303	97.1767	97.3211	257.986	167.019	136.601	118.724	97.8126	70.9608
BnaA10g22920D	113.537	153.069	143.208	147.486	126.911	121.69	117.759	140.019	158.885	129.147	108.107	99.733
BnaAnng33440D	483.133	195.885	11.9843	9.92909	0.104633	0.353732	679.481	169.861	3.6092	4.72473	0	0
BnaA02g05430D	186.484	186.786	151.508	98.9003	75.035	88.8098	201.517	160.033	148.854	110.817	64.915	85.2168
BnaA04g19410D	281.024	260.004	88.5832	74.1811	89.1433	82.9404	204.305	143.06	113.826	90.2879	66.3418	64.2227
BnaC04g43780D	327.907	242.324	60.2429	49.4703	32.9399	57.7419	319.752	208.923	83.6929	62.2582	44.3052	67.4733
BnaA09g09960D	258.356	184.69	207.687	144.381	132.662	78.8724	162.16	92.3773	77.8758	77.9441	83.6927	54.8889
BnaC08g08260D	829.144	53.9509	3.5093	2.76723	0	0.169497	631.142	28.7618	3.3016	0.970258	0.556714	0
BnaC05g47280D	170.138	171.492	238.297	176.921	85.254	84.3396	156.377	110.237	116.409	121.018	69.4116	52.9582
BnaCnng68870D	564.556	373.094	40.885	16.6288	0.467295	2.63296	358.708	176.736	13.4323	4.77279	0.756699	0
BnaC02g12080D	234.472	194.672	159.398	125.201	65.0868	60.7722	231.309	191.201	117.428	79.1495	52.1287	40.9323
BnaA02g08230D	206.024	162.363	191.838	116.226	57.7776	66.0056	241.712	154.208	108	137.493	64.3212	45.7772
BnaC04g38560D	58.0058	65.6575	217.796	215.938	102.573	98.9434	59.2285	86.6801	214.445	209.75	133.479	88.1936
BnaA10g21240D	114.688	189.692	126.229	114.058	79.1563	151.166	96.3543	153.881	196.439	183.621	73.6576	69.7908
BnaC02g45730D	194.141	163.125	177.129	133.232	76.644	76.9367	215.445	163.348	138.079	88.4482	66.8057	55.119
BnaA05g32690D	791.069	87.3869	2.80121	12.3619	0	0	581.746	63.8664	4.75491	3.78637	0.135784	0
BnaA09g35800D	0	0.0912296	0.615666	7.05222	129.775	296.768	0	0	0.60681	20.3697	309.025	783.177
BnaA03g47010D	116.108	176.06	237.538	140.151	50.7099	86.3949	125.662	137.475	140.149	185.55	69.1916	81.5173
BnaC05g16660D	87.4375	232.846	96.6639	103.967	50.08	100.024	68.3914	196.646	247.273	212.331	71.4938	78.7365
BnaC01g06430D	126.304	176.11	165.955	147.53	122.219	131.207	104.496	123.607	142.306	107.006	103.284	94.7851
BnaCnng24330D	148.757	167.944	192.598	158.374	89.0951	86.6735	148.888	145.843	131.482	125.974	76.2561	71.5478
BnaC09g16950D	334.217	196.426	297.478	92.5524	22.2494	40.6792	254.236	127.868	89.1105	65.9043	16.2813	4.73134
Novel03196	66.9969	90.0471	408.516	214.428	78.937	77.239	65.3456	72.3027	174.692	169.918	80.4945	41.7406
BnaA03g54790D	204.156	175.61	221.541	126.829	94.882	62.2414	158.737	129.86	94.4344	126.823	90.1695	55.3593
BnaC07g31580D	191.499	133.961	183.893	132.079	111.259	115.46	219.743	106.605	93.862	77.8137	70.5448	103.715
BnaC06g20420D	193.457	164.937	130.047	93.4238	75.1506	111.683	178.281	125.452	99.4195	93.6152	77.1808	197.62
BnaC08g10200D	165.265	190.117	124.135	130.705	84.0895	104.257	182.529	178.036	143.247	117.538	59.094	58.9771
BnaA08g26540D	196.635	245.116	271.072	64.2672	26.8522	29.4032	236.763	249.017	152.386	51.3386	12.1891	2.81556
BnaA05g36870D	793.952	251.709	18.8378	9.57087	0.859489	1.2914	285.267	142.24	16.1711	15.0929	1.72316	0.132678
BnaCnng13430D	153.025	170.365	236.688	121.693	78.309	76.8385	117.866	125.833	113.397	142.51	84.3025	114.811
BnaC03g16230D	109.111	175.72	137.936	117.538	59.342	101.448	103.111	179.319	191.364	152.463	79.9809	128.239
BnaA06g12030D	0.0815236	0.659713	77.2807	219.465	318.421	314.151	0.261184	0.0894335	41.5339	112.955	189.574	259.868
BnaA02g24310D	246.253	167.973	162.072	121.043	44.5871	55.2458	264.742	174.748	150.806	93.9837	36.4069	15.3105
BnaC08g46940D	92.7253	121.954	277.174	173.177	71.6957	93.546	85.3439	118.414	174.663	174.184	78.9341	70.9163
BnaCnng74350D	210.819	225.868	100.03	76.8622	92.4783	42.5382	265.595	271.382	124.051	53.625	48.3982	19.0543
BnaA03g09170D	140.783	189.913	355.513	124.31	27.7094	65.7933	162.259	180.436	178.654	81.9936	12.8593	9.7322
BnaC04g54560D	244.225	158.011	132.412	107.805	66.2402	54.5074	273.059	168.252	125.402	95.2326	62.7268	41.9866
BnaC02g45580D	254.127	208.776	131.038	100.07	64.7023	62.3748	211.792	170.243	122.397	89.005	60.8886	54.1326
BnaCnng70250D	126.342	192.803	28.1235	70.3123	57.8502	102.272	140.802	371.553	136.998	149.27	80.9377	71.7563
BnaC09g00220D	171.688	107.542	348.396	259.266	86.7901	91.0714	117.945	74.7943	154.409	90.1904	14.8062	10.5521
BnaA06g14580D	209.776	149.672	109.764	120.99	80.8293	105.334	233.324	127.136	89.3186	124.493	80.3605	95.2166
BnaA06g25170D	0.0718695	2.13819	146.983	158.981	132.025	168.56	0.115127	2.7792	115.577	202.52	218.437	377.81
BnaC07g43630D	110.026	161.978	109.068	122.888	123.054	126.308	144.378	165.923	163.438	116.145	107.344	75.2438
BnaC08g12280D	0.133221	0.0422772	17.5335	105.905	326.208	292.141	0.0474237	0	9.91885	88.5591	336.835	348.166
BnaC03g43790D	148.186	218.423	74.6199	77.0622	50.4428	53.5494	188.659	360.832	174.782	106.661	43.8871	27.4111
BnaAnng11560D	140.385	127.714	172.159	117.998	80.0294	58.3808	161.757	159.846	163.828	146.303	135.271	57.589
BnaA04g18190D	135.94	127.589	201.064	200.033	107.622	103	157.354	109.726	116.116	118.242	69.3443	72.0855
BnaC05g19970D	112.111	163.777	187.098	144.29	89.3348	97.315	132.217	175.403	139.178	117.803	66.7495	91.6362
BnaA09g49260D	115.079	140.283	249.961	203.59	127.034	127.317	87.0959	78.1253	95.4355	116.431	79.7249	96.7313
BnaC03g31390D	105.65	168.255	204.212	95.1591	81.7245	100.788	102.311	153.298	227.774	137.484	76.9944	61.9231
Novel01786	359.642	197.789	76.3036	59.1537	42.2968	35.5943	284.172	173.292	128.436	84.7643	47.6266	26.2243
BnaC09g32340D	0.283744	2.70135	69.4402	68.4714	128.455	279.383	0.0757547	5.29167	49.9017	104.67	224.638	581.781
BnaA01g26720D	93.3579	157.688	126.718	145.69	104.132	93.8333	119.999	186.688	181.745	148.721	112.724	42.4845
BnaCnng28630D	0	0.0214437	0.0263115	0.768758	146.652	461.786	0.0962162	0	0.155598	4.21445	193.277	705.395
BnaA09g48990D	55.2931	208.59	132.257	187.44	96.1394	169.74	45.0496	114.402	213.431	200.487	47.335	39.3216
BnaA08g30400D	182.247	164.374	209.78	128.308	80.2679	67.1372	172.432	131.533	112.124	113.907	81.6062	64.695
BnaA01g15940D	161.807	116.05	213.906	150.2	88.1615	89.9507	174.878	100.738	120.296	122.195	83.893	86.1802
BnaA08g16640D	218.658	200.848	192.641	96.6607	77.9729	55.6491	201.312	144.384	95.7903	89.1085	68.2309	64.3732
BnaCnng69940D	463.267	178.285	8.2137	9.316	2.89432	5.46617	569.176	222.119	24.0065	10.5742	3.29813	5.75863
BnaC05g05370D	93.6476	150.525	209.632	162.054	81.9336	95.8497	96.5357	144.907	118.094	146.255	81.2548	121.488
BnaC02g16370D	0.516916	22.736	179.46	177.419	181.062	160.92	0.515227	25.556	121.728	171.769	244.252	216.219
BnaA10g07350D	88.1371	103.781	398.472	265.456	40.2972	66.4138	71.8838	71.9555	201.454	159.535	24.5902	9.91189
BnaA06g12320D	0.125565	0.0597711	68.5725	224.659	304.417	211.501	0.134094	0	49.9486	163.048	296.402	182.418
BnaCnng50290D	0.0818289	0	29.6325	132.661	201.539	320.101	0.262162	0	24.8724	110.907	230.234	449.972
BnaA09g53380D	235.488	168.856	253.175	81.2307	26.109	37.737	331.056	169.134	125.063	53.3337	13.7603	5.15191
BnaAnng22990D	178.537	157.658	207.415	129.152	71.6583	77.5131	180.101	123.18	110.945	121.065	71.6804	69.642
BnaA02g34050D	35.5035	81.0058	228.423	227.398	146.132	163.47	24.4342	58.722	132.343	155.529	140.911	104.019
BnaC09g21870D	187.203	113.165	234.59	210.753	50.6228	62.1239	197.246	95.8727	157.634	138.03	33.9915	16.4474
BnaA10g00270D	110.299	86.8918	197.591	178.343	133.526	111.977	85.4268	79.8295	116.241	157.119	138.281	100.664
BnaCnng71840D	178.902	146.307	78.6415	136.913	121.209	129.02	174.045	133.092	84.8045	150.368	99.062	63.1849
BnaA02g27140D	54.5928	110.589	226.558	187.26	61.5835	102.22	70.9246	151.737	208.754	169.538	70.4315	80.6722
BnaA05g06970D	252.936	141.002	199.392	87.6102	51.371	72.7532	223.004	124.335	100.257	104.241	53.6373	83.5871
BnaC08g16850D	14.7501	39.412	16.8972	8.44778	27.3003	350.241	13.2074	32.1969	25.8312	21.9985	52.1652	891.51
BnaC09g17220D	185.27	194.584	101.883	86.5405	89.6641	101.917	144.322	132.888	83.1739	100.573	89.1641	183.712
BnaC05g07130D	160.883	184.682	214.541	123.153	72.5617	73.2225	156.045	156.737	127.833	105.69	62.487	55.6572
BnaA09g32990D	170.179	190.741	154.609	112.79	94.2164	83.5722	150.629	138.102	113.454	122.063	85.1356	77.9388
BnaA09g17580D	203.938	192.552	99.3906	116.515	78.9355	89.2618	235.658	143.741	91.2049	111.774	71.7684	56.9347
BnaAnng19920D	199.449	154.663	105.376	76.5291	103.191	54.5471	298.814	168.231	95.4747	87.0292	91.8579	55.6403
BnaA07g16820D	181.017	135.51	209.282	139.386	60.699	79.2491	225.288	116.112	127.545	103.207	50.063	59.935
BnaA02g34540D	45.4875	32.5645	139.744	209.918	291.747	234.961	36.5287	15.3239	47.6296	87.1642	194.211	151.827
BnaC03g55840D	6.70661	15.2712	12.2765	2.13856	30.6152	357.273	2.65813	6.37129	13.5328	3.60265	95.3461	940.408
BnaA05g00250D	36.2425	199.159	121.863	113.245	59.6384	135.711	24.0971	184.051	268.334	178.158	70.7729	94.6103
BnaCnng75520D	125.419	137.753	231.935	174.327	124.659	118.972	113.095	105.719	114.319	90.063	75.1742	71.5903
BnaC07g50840D	315.435	142.515	119.835	117.607	86.6741	52.544	283.27	104.486	76.4477	85.3019	61.0646	36.9176
BnaCnng53490D	489.985	151.149	63.6353	22.0602	7.21971	6.50867	505.069	146.525	54.8379	29.8408	4.75063	0.297199
BnaC03g34320D	168.494	127.132	215.203	168.247	99.7282	82.0093	175.273	96.4479	93.2748	116.534	73.0409	65.8889
BnaC05g43330D	129.318	149.257	195.492	136.096	100.431	84.69	134.548	130.47	149.941	107.595	85.2717	78.0694
BnaCnng24140D	109.091	100.738	302.702	244.641	69.998	59.7563	102.14	86.74	209.784	140.386	43.8844	11.1834
BnaAnng37980D	31.9449	664.508	94.1613	121.634	17.1377	77.2494	26.1606	250.213	53.1686	90.3614	7.59156	45.4241
BnaC06g43680D	161.261	173.549	255.395	177.943	113.289	99.807	123.805	98.726	82.31	74.1884	59.0799	59.5155
BnaC07g12330D	145.381	167.68	182.781	124.877	75.7499	90.4761	141.227	142.776	111.707	120.139	74.7485	99.5599
BnaA09g05810D	140.152	292.315	138.317	79.9458	43.1966	44.9452	143.971	267.286	143.746	89.2008	54.9625	38.6525
BnaCnng73180D	250.059	142.183	201.73	113.482	81.0981	42.5367	150.382	83.8886	101.309	132.38	111.495	65.9536
BnaAnng15790D	182.666	245.187	179.05	107.699	131.403	73.9785	132.2	134.582	92.7174	69.8357	79.0239	48.1304
BnaA08g09830D	134.731	170.623	204.732	157.886	76.208	85.4853	103.136	131.304	114.109	135.742	82.4583	79.6298
BnaA09g44700D	0	1.43451	148.439	295.238	250.753	181.108	0.268189	1.30861	85.6572	194.349	195.81	120.481
BnaA03g00720D	218.962	209.218	182.847	81.8156	58.6711	46.5188	220.211	169.439	103.742	84.6084	58.7598	39.8615
BnaC02g19510D	142.998	162.889	205.614	140.29	81.574	82.8854	137.104	121.352	113.708	130.3	77.1375	78.3158
BnaA10g17990D	147.371	146.503	162.827	120.548	116.163	109.521	151.436	129.059	111.746	100.882	96.2473	80.3722
BnaC07g17990D	1.2385	0.634895	70.6682	193.943	289.033	315.224	0.746095	0.13935	40.1091	116.995	218.057	224.972
BnaC06g19660D	29.5388	33.0477	78.061	161.891	174.376	118.181	25.7798	33.4074	86.0677	218.477	341.623	170.401
BnaC04g23010D	162.751	124.097	190.984	144.36	83.0063	78.2557	203.071	129.591	120.339	101.521	62.7483	69.9865
BnaA03g13530D	40.4954	118.935	290.513	235.719	103.403	146.177	30.6398	53.3797	114.626	184.148	66.1124	86.3835
BnaA07g38380D	0.442498	45.5502	321.676	154.714	70.4912	88.6703	0.443021	73.6339	370.065	222.152	82.1682	40.2911
BnaA08g05460D	130.85	153.717	137.918	128.807	84.4944	80.9859	153.071	170.345	156.459	128.23	83.0177	62.3382
BnaCnng11890D	151.985	100.442	305.41	213.324	49.9888	81.9044	163.405	71.5024	146.372	127.631	37.3634	20.7939
BnaA07g05610D	203.397	321.71	96.3928	44.1416	28.3885	27.0773	200.176	321.669	115.388	53.3164	33.0912	24.5778
BnaC01g12490D	124.124	156.153	186.423	151.976	89.8104	89.8087	109.054	115.499	92.7819	137.43	91.3334	117.264
BnaA08g29090D	121.834	150.287	195.702	141.241	83.8625	82.497	128.328	121.213	113.006	125.22	93.069	105.239
BnaAnng08850D	212.757	155.931	123.739	94.1762	94.3541	93.7024	164.614	103.642	69.4799	98.944	98.1353	151.879
BnaA03g11110D	148.805	207.793	169.774	83.4499	65.0424	59.7361	173.259	196.442	165.377	86.0121	49.9538	54.8964
BnaA06g02460D	132.9	143.695	152.227	159.398	143.397	123.963	130.468	98.851	77.4001	105.408	106.731	85.0709
BnaC05g46930D	159.927	202.836	94.7174	97.6264	96.2254	93.9917	155.719	144.777	151.75	143.028	78.9428	38.5227
BnaCnng38910D	68.1301	81.4548	150.308	143.465	89.2819	91.5023	98.0497	108.406	132.496	185.756	162.51	146.501
BnaA01g27000D	185.393	109.616	176.698	66.0854	74.5803	70.5369	140.153	134.78	241.146	152.001	88.9013	17.1827
BnaA05g29390D	86.1081	88.9233	282.378	241.295	69.2409	65.0304	93.0068	95.9142	210.641	163.388	44.6913	14.4614
BnaCnng50220D	109.82	165.679	118.618	167.21	78.0627	87.515	140.807	205.833	143.888	140.719	57.5013	37.7811
BnaC08g43960D	0.20419	25.0771	288.854	147.495	62.2447	64.8839	1.47191	42.1123	312.439	294.281	169.408	44.2152
BnaC01g22840D	189.445	171.603	109.446	97.1948	128.494	73.8175	177.969	130.847	103.957	85.0791	104.924	78.4695
BnaC04g21740D	93.6842	82.8372	259.442	272.79	83.2467	83.5744	86.8838	76.521	180.49	154.134	53.5052	23.9378
BnaC08g23840D	192.601	146.403	228.325	140.266	67.5691	67.2771	201.556	111.36	103.426	101.106	49.7617	40.1218
BnaA01g19290D	0	0.0781968	0.095948	0.438026	93.3677	281.594	0	0	0.0945678	17.6057	271.911	784.504
BnaA09g02120D	80.1242	132.153	497.25	146.958	9.18296	30.9427	92.8912	111.731	246.585	87.5421	10.5901	2.59769
BnaA05g33890D	278.418	167.152	118.874	92.6871	66.6685	63.5231	247.198	108.397	103.566	90.9071	54.568	56.1263
BnaA01g21430D	0	0	0.792067	10.0042	63.5251	348.251	0	0	0.867415	17.8884	190.972	815.695
BnaA09g49190D	253.836	309.631	156.047	99.0835	38.183	33.9527	194.881	178.251	88.7853	56.331	26.2576	12.6807
BnaA10g15900D	100.253	208.925	150.333	132.886	62.9567	109.851	162.539	172.278	104.017	118.123	62.0137	61.791
BnaA07g04390D	76.1931	166.97	128.51	101.842	68.9329	90.825	95.1914	221.307	229.807	126.478	69.9742	69.4484
BnaA06g17780D	74.7335	219.594	218.31	142.05	72.0846	60.6386	90.4405	220.642	166.006	102.859	54.4487	23.045
BnaA08g26270D	228.547	190.04	144.626	86.0798	76.7185	61.1421	224.062	146.714	90.1769	78.6399	64.2415	52.4826
BnaC08g32200D	250.92	158.083	137.623	89.9853	81.0829	62.1662	232.247	118.735	80.1091	91.9506	78.9678	60.8685
BnaAnng09390D	28.8594	61.7802	94.2796	115.298	91.5933	412.729	29.7169	265.975	164.509	87.4037	68.0244	20.8483
BnaC04g27070D	169.678	199.923	157.356	82.3148	54.8836	57.0679	188.926	221.576	151.564	78.9236	42.054	36.7222
BnaC03g59670D	159.193	97.8887	331.009	197.631	57.5923	54.4459	124.855	79.7719	159.859	134.404	34.0828	9.1882
BnaA03g23530D	31.4848	188.034	106.65	156.963	80.8443	115.077	36.6843	183.498	236.438	197.2	64.3502	40.7659
BnaA02g30070D	189.045	171.986	305.46	131.233	23.939	61.9466	193.536	129.807	133.586	76.9398	12.1891	7.97743
BnaC08g38660D	114.578	87.6815	288.891	218.331	81.6382	67.59	129.675	79.1411	162.202	133.1	55.9284	17.789
BnaA04g26920D	120.946	156.746	129.504	114.018	61.751	82.2524	187.557	193.984	147.613	123.326	64.0527	54.4388
BnaC09g22080D	155.788	156.907	130.163	122.594	96.9952	89.3763	180.167	136.619	120.744	108.894	91.5916	45.9366
BnaCnng38240D	91.5326	173.988	112.559	102.075	72.4028	117.865	88.5436	174.572	151.217	169.579	84.094	97.1293
BnaA03g16540D	226.443	163.742	205.859	139.457	82.924	73.2646	197.964	90.2987	80.3401	75.2138	48.9391	51.0594
BnaCnng66410D	180.49	159.96	186.786	102.286	76.2435	65.9987	177.471	140.521	113.754	93.534	67.4955	69.3354
BnaC01g38380D	186.4	122.985	103.947	105.486	71.0288	122.696	180.94	111.522	98.9716	115.049	70.7514	143.802
BnaC02g19980D	1.14389	98.5022	294.273	222.141	75.2525	107.732	1.25213	123.104	283.883	148.231	46.694	30.5757
BnaA02g32750D	209.51	175.912	146.752	118.512	14.6973	38.2578	334.737	206.811	133.771	48.0509	4.53325	1.1941
BnaA08g04620D	80.2973	258.049	164.204	164.067	94.103	79.9097	92.3825	157.637	130.505	93.9298	72.6584	44.9608
BnaA09g09990D	235.532	202.646	205.337	114.22	76.1169	80.1257	138.404	105.405	89.2813	87.9113	53.9844	43.06
BnaC02g40260D	84.2944	136.603	127.413	128.875	87.7724	106.942	108.764	167.277	153.314	123.03	88.1188	118.33
BnaC08g43840D	111.517	99.235	118.648	81.8378	65.8225	54.3196	248.115	199.877	155.722	112.889	108.758	73.9016
BnaA07g34180D	68.713	160.267	194.266	133.953	82.1041	96.0481	100.368	179.162	192.226	117.38	58.3808	46.3258
BnaC01g15060D	442.827	204.113	33.389	26.0171	2.26501	8.55061	478.672	181.651	23.3794	19.1464	2.72463	6.42473
BnaA01g32320D	170.974	192.927	149.108	92.8991	54.3497	72.0759	138.35	145.579	169.923	116.518	56.6429	68.8144
BnaA07g16270D	224.666	240.973	99.8059	80.6379	58.8939	60.6808	205.202	181.132	111.98	87.0671	50.3492	26.408
BnaC02g29130D	188.176	175.683	185.461	107.791	66.8286	60.6363	177.865	145.468	118.035	94.2063	55.5001	51.9526
Novel05975	0	0	0.268843	4.61477	74.073	227.449	0	0	0	18.2605	237.292	864.469
BnaA10g18910D	106.649	136.726	184.52	125.989	74.4456	82.2487	143.883	161.18	133.144	100.815	79.3458	96.5895
BnaA08g12190D	194.681	188.641	166.724	95.2959	71.9036	57.8769	147.772	146.829	122.094	106.544	73.4139	53.4595
BnaC09g35690D	101.695	246.765	60.4641	83.3779	126.06	129.101	96.8719	156.027	101.846	112.107	120.678	89.5321
BnaC01g22070D	82.1687	118.019	176.991	155.015	107.772	158.59	102.967	113.588	90.23	107.994	70.1944	140.523
BnaC05g45560D	676.34	17.1512	63.8054	53.556	16.2549	10.7051	397.061	10.9329	40.6011	99.1819	27.9334	8.40759
BnaA09g33030D	182.323	132.784	193.098	132.863	64.8281	58.8639	244.267	119.841	101.888	92.0617	59.3829	39.2233
BnaC07g48320D	153.599	197.489	162.318	127.846	67.3046	63.7754	154.161	157.044	120.799	114.867	61.1162	39.3135
BnaC04g47680D	205.485	159.82	103.381	110.689	97.329	85.7353	154.614	112.711	105.874	133.625	92.6683	57.2765
BnaA02g14510D	135.519	142.229	191.186	117.407	92.3602	79.7092	142.885	125.023	110.875	112.818	87.1684	81.1774
BnaA03g34910D	145.301	134.466	226.763	142.808	80.9289	69.2386	155.894	113.266	118.206	104.067	65.6233	61.6424
BnaC05g44490D	142.705	166.798	177.767	142.546	103.269	89.1681	133.128	131.977	110.969	89.8205	62.9299	65.0357
BnaCnng58960D	92.6369	92.6309	372.453	203.746	43.7996	90.2174	106.863	81.4119	156.129	105.823	27.4646	42.648
BnaAnng08420D	156.523	145.362	195.752	126.952	81.1172	66.5422	179.813	141.218	120.725	94.903	61.8619	43.9343
BnaC07g09400D	80.7899	70.9385	389.784	332.502	11.7186	76.653	68.082	54.0178	199.926	123.43	2.82512	3.45161
BnaC09g36540D	175.293	175.081	191.163	92.5946	71.0018	65.7333	162.323	133.571	98.8709	90.7288	77.1289	79.7122
BnaC09g48200D	40.3449	22.2895	193.446	268.832	185.771	80.8037	58.2516	28.2988	147.843	178.057	171.746	35.2079
BnaC06g28490D	161.828	163.854	252.094	150.498	78.2135	81.5578	127.185	94.5215	85.4531	91.4452	59.0008	63.9742
BnaC05g30330D	217.689	130.002	165.082	125.73	98.1224	67.7987	255.278	85.4139	80.2674	78.4439	62.2508	43.2626
BnaC06g39910D	119.856	147.4	179.595	169.854	90.7747	85.3917	110.085	139.667	135.431	114.269	71.1585	45.6217
BnaA01g13670D	179.804	248.985	116.85	51.8159	34.4025	27.6796	186.121	268.513	146.819	83.1537	43.2519	21.667
BnaA05g28810D	124.89	116.229	199.004	164.695	114.475	95.8343	122.811	87.7753	105.719	113.983	104.422	58.4357
BnaA02g29450D	126.894	122.993	171.072	148.008	132.884	102.484	135.937	108.204	93.9668	87.2764	86.5731	90.1287
BnaA09g33730D	222.146	177.052	164.366	87.2815	81.9963	48.1492	242.057	136.992	94.2937	57.1697	58.4717	34.4359
BnaC09g33220D	124.394	136.88	200.335	140.695	78.9251	83.108	143.758	139.685	128.615	100.295	60.8195	66.8697
BnaA03g11150D	120.461	215.874	215.645	101.793	49.3509	69.5394	110.435	174.903	170.561	86.0121	33.3276	54.5199
BnaA05g04770D	151.142	147.518	198.636	151.853	79.6385	77.344	148.284	108.172	102.606	111.75	65.7069	59.3908
BnaAnng15040D	614.421	105.453	24.6319	22.6256	11.3333	5.5185	476.551	66.1912	20.1825	27.2274	15.5362	12.0521
BnaA01g17570D	77.8013	242.727	105.27	156.079	113.252	158.344	76.7947	114.255	112.789	108.157	67.2583	67.1415
BnaA05g33510D	24.931	90.8092	172.886	184.381	100.021	188.164	26.5606	55.9148	106.995	124.087	124.002	198.838
BnaCnng19850D	134.798	114.78	198.377	166.44	75.7705	82.0158	169.196	115.265	122.116	103.181	58.843	56.3326
BnaCnng03140D	162.31	127.701	198.18	122.436	73.3806	64.0938	156.315	114.536	121.514	122.298	78.1834	55.7856
BnaA04g01120D	84.5584	127.586	199.427	154.667	58.7909	81.2294	81.1246	149.541	199.36	144.15	62.4942	51.9694
BnaA04g01580D	188.466	126.114	173.022	127.012	72.0887	70.2418	225.232	114.659	107.872	89.625	50.1544	50.2025
BnaC01g02930D	72.7742	144.43	126.047	146.386	114.017	134.534	80.9201	120.193	151.547	139.261	84.4896	79.4897
BnaA10g08550D	60.9897	45.4556	46.5114	107.653	209.762	282.451	56.0789	40.3942	33.0706	83.7144	185.801	240.972
BnaA09g30340D	181.844	181.681	131.225	91.5621	67.5117	68.1586	161.778	163.535	129.671	90.3284	63.357	61.4451
BnaAnng08030D	0.0975372	4.68008	99.3086	255.646	85.025	182.282	0.145828	1.99021	222.802	393.417	81.9563	64.7402
BnaA05g11500D	188.386	194.561	159.123	105.418	94.7075	60.1425	123.329	118.455	98.3955	110.447	96.3457	41.1681
BnaA09g38860D	103.842	140.701	229.846	135.934	47.3015	92.8919	92.3911	104.138	101.921	147.063	64.886	129.128
BnaC05g20200D	155.055	159.643	187.668	109.815	62.7964	72.9683	140.286	125.159	108.717	113.358	66.5274	87.2092
BnaA05g16430D	4.29409	143.052	158.671	123.403	99.3278	122.933	5.83311	135.594	195.98	179.976	130.495	88.038
BnaA09g33900D	117.992	184.023	114.602	82.5785	48.073	51.6718	153.53	228.745	194.707	123.088	48.5909	39.6565
BnaA07g38770D	271.034	146.646	33.4267	36.5315	11.9754	11.271	440.586	317.559	69.4166	30.5497	12.4995	5.73219
BnaA02g22660D	117.258	152.303	132.321	137.837	91.848	115.212	132.922	151.45	132.894	100.861	61.6496	59.8137
BnaA02g26210D	6.3024	102.002	308.066	153.411	62.4782	77.0123	4.18787	135.82	252.679	207.486	54.8149	21.5755
BnaAnng23710D	127.2	132.602	216.068	109.983	64.631	84.9538	129.831	118.842	146.547	115.549	68.324	71.0912
BnaA07g19250D	136.483	164.955	184.793	130.747	82.5545	82.8173	135.195	124.999	88.9182	92.195	71.4567	89.5122
BnaA03g24220D	0.048337	0.230092	6.38054	48.1011	177.511	317.544	0.0258102	0.212108	8.15312	50.7167	241.259	534.39
BnaAnng21430D	124.477	129.624	175.086	128.166	94.7414	95.3337	122.562	111.897	102.403	111.276	86.3014	100.902
BnaC01g43880D	197.795	177.908	203.951	104.554	75.3916	61.1988	196.571	130.128	92.0496	69.7212	38.0339	34.6184
BnaCnng27850D	0	0.215176	0.880075	3.69633	36.5965	405.67	0	0	1.12764	23.9107	95.4477	813.888
BnaA01g16430D	146.848	250.919	71.8728	95.2208	45.0886	59.1485	166.746	223.841	139.798	120.669	36.5384	24.4676
BnaA05g11890D	159.297	99.1122	310.647	229.117	62.3194	75.1857	115.879	55.8065	104.656	112.859	35.5632	20.1274
BnaC05g05500D	220.899	169.603	237.798	79.9919	34.1316	45.8945	207.861	139.545	118.035	77.3719	26.6581	20.5753
BnaA09g05620D	147.934	157.21	208.129	125.611	82.2115	58.2631	153.241	130.047	106.463	76.9529	66.662	62.5555
BnaAnng22920D	55.0692	52.6994	264.031	272.462	43.6864	92.9955	107.521	88.8074	224.002	143.077	17.2	11.3113
BnaA05g13870D	107.433	139.906	147.606	71.3932	56.2555	50.4387	130.037	233.117	190.105	117.337	79.0747	50.0458
BnaA04g24580D	0.0233422	0.377784	0.272673	1.02075	48.2085	197.109	0	0.204856	0.403125	6.9936	230.013	887.476
BnaC02g05940D	127.945	157.316	205.209	141.877	88.7271	90.8091	124.086	116.815	93.1879	84.0237	61.7447	79.9284
BnaA09g34720D	126.079	107.311	279.847	181.128	30.2313	47.1789	107.696	104.44	183.933	160.587	31.1484	9.53307
BnaA02g10330D	160.417	131.643	129.409	131.842	104.662	96.3742	169.669	95.8727	102.562	106.099	82.4236	57.8939
BnaA05g28850D	130.365	148.183	181.101	107.927	74.2962	78.6931	138.045	126.584	130.411	96.6603	76.0797	80.3148
BnaC04g21170D	143.991	144.711	159.939	107.194	70.1343	86.6531	169.993	133.537	105.052	92.2823	60.5493	93.6175
BnaC03g23910D	556.303	73.5911	14.5379	15.6336	10.0528	4.63434	561.012	81.1581	16.5577	24.236	5.77855	3.95011
BnaC08g20980D	245.31	190.363	105.965	67.1067	31.2245	25.5747	178.39	239.53	135.009	93.1775	37.772	17.0701
BnaA07g09950D	117.405	195.832	158.602	122.213	57.3874	49.1727	142.815	186.478	131.787	112.095	57.8126	33.741
BnaA03g21380D	184.316	133.211	159.106	142.545	84.2299	91.4561	167.05	92.5579	88.0426	85.6029	61.357	74.6948
BnaA07g23080D	96.9567	133.043	177.728	124.739	68.6996	82.766	106.651	123.78	130.084	137.201	84.5281	97.9135
BnaC06g20430D	153.038	131.052	189.894	166.114	65.2423	68.4207	166.806	100.655	121.044	115.956	53.7817	30.8275
BnaC03g45610D	212.153	17.7872	12.1648	44.6459	98.9617	248.257	214.898	19.9361	16.339	53.8025	111.447	312.267
BnaC06g36880D	78.1078	198.539	240.546	102.125	54.8698	72.6802	53.4896	128.769	212.56	155.435	41.7536	23.683
BnaAnng00560D	144.805	128.826	195.794	118.811	63.5018	65.5222	142.805	132.962	121.001	115.392	72.9824	60.0363
BnaC04g48440D	116.939	216.863	99.0472	78.4453	45.3757	64.2015	108.49	228.294	208.487	105.72	47.2486	43.2632
BnaA02g04340D	58.1894	82.3001	142.584	141.915	126.987	124.75	55.6867	72.3839	102.884	137.992	167.089	148.748
BnaC07g32820D	180.475	159.941	157.815	96.797	61.4458	62.6636	204.055	145.369	107.244	90.5574	58.7679	35.9408
BnaA05g14980D	149.614	150.577	192.748	96.3527	64.2449	64.9688	148.922	137.14	117.9	110.244	67.5803	59.5043
BnaC06g01250D	133.775	141.901	157.945	117.601	79.1823	91.4707	168.122	133.958	97.6356	92.476	61.0027	84.5788
BnaC01g05460D	161.702	147.545	152.572	104.223	67.7013	70.0338	144.994	116.812	119.97	113.588	82.7118	76.4225
BnaCnng15340D	107.127	145.603	226.406	150.843	79.8308	83.9828	112.146	93.8109	105.895	125.055	68.7213	58.6008
BnaC08g46120D	193.595	176.441	190.861	116.718	90.194	71.5718	169.718	97.1232	75.0276	77.6206	50.4432	48.0686
BnaA02g29080D	72.3179	87.3615	379.94	219.048	36.259	89.223	69.6862	62.9564	145.396	124.883	24.4954	45.62
BnaC03g01720D	247.493	104.695	70.8949	80.3953	141.052	98.534	206.881	66.9777	49.0523	70.4335	136.704	83.5871
BnaCnng71630D	136.31	149.906	154.516	95.106	77.8875	69.335	150.167	167.069	118.898	87.0524	76.8979	73.2931
BnaA04g14130D	152.667	117.405	110.531	108.339	76.3614	104.044	153.245	106.757	101.558	100.155	85.0932	139.94
BnaA04g10240D	257.303	210.325	123.053	72.1976	57.8006	46.4905	226.241	124.763	58.6202	72.0763	54.3791	51.1473
BnaA04g25530D	260.726	209.227	107.304	84.4462	55.3586	41.7287	237.911	143.809	89.6391	67.9681	38.8838	16.4586
BnaAnng15750D	64.4946	119.282	202.361	165.541	137.082	113.067	49.6263	93.6602	115.374	104.141	106.033	82.6012
BnaA08g08690D	26.6836	38.8728	110.247	134.088	368.284	230.515	11.2837	9.4301	20.2065	43.264	153.325	204.811
BnaCnng26710D	168.403	136.706	223.55	160.805	86.9844	62.9792	124.463	91.7577	105.621	97.1817	58.4885	33.7705
BnaC03g64400D	190.619	170.02	141.297	78.6898	59.2923	54.8285	172.288	142.767	108.458	101.807	69.5489	60.5703
BnaC03g37210D	153.81	113.523	166.972	123.571	94.2856	72.8279	184.359	107.013	103.691	97.5421	76.5809	55.8294
BnaA06g23960D	176.393	281.329	102.25	70.937	35.8963	57.3155	144.014	188.976	135.446	109.473	31.9994	14.3292
BnaA05g21410D	214.423	129.036	194.917	121.464	95.0914	53.8789	213.605	88.2368	80.5851	75.4454	48.9712	32.3499
BnaC04g55930D	96.7285	82.2087	298.377	237.531	62.5161	75.0716	82.565	65.1499	154.875	137.6	37.6541	17.4773
BnaA08g21860D	146.357	131.13	265.446	180.738	76.0389	59.7935	113.219	78.1853	121.456	109.105	50.8421	15.039
BnaC03g26410D	281.402	176.403	221.724	58.7056	21.0575	34.1601	212.684	131.94	104.853	68.2912	20.5556	15.3243
BnaA10g13210D	110.061	157.389	40.0202	84.0202	143.993	158.235	94.4964	118.776	74.4519	123.007	138.034	104.143
BnaA02g21420D	177.532	173.28	51.0443	44.0376	106.177	63.1512	178.866	165.087	108.853	64.5622	126.503	83.2276
BnaC07g20940D	85.0185	119.577	210.712	153.102	90.1592	84.3062	110.463	151.393	171.65	91.7449	48.3562	24.2281
BnaA07g32570D	202.624	169.174	118.594	127.896	130.224	83.9761	153.192	105.127	73.037	52.4464	70.5458	52.6695
BnaAnng11950D	108.201	103.011	99.0503	81.5604	104.858	116.226	93.3297	112.422	134.16	104.726	129.37	151.253
BnaA05g08120D	154.801	106.582	122.368	111.999	87.6812	72.8441	286.048	103.398	81.2176	86.2452	77.94	46.5669
BnaA09g18420D	0.260099	16.5908	306.266	333.288	102.795	84.3932	0.444427	22.3132	183.033	180.252	75.0239	31.5773
BnaA02g11140D	0.417968	25.286	101.29	125.329	92.6215	54.8049	3.67232	104.293	393.731	311.338	104.798	18.6266
BnaA03g12510D	104.77	129.06	184.849	128.03	73.0415	77.3936	127.305	138.973	126.069	108.563	62.9641	74.43
BnaC08g45100D	69.3519	76.3468	83.0921	71.6302	73.1542	53.828	131.51	178.263	160.173	145.833	173.805	117.951
BnaC05g41690D	98.3825	99.3589	126.775	120.468	80.792	153.919	102.427	91.022	82.1282	84.5511	65.8116	228.803
BnaA06g12670D	169.301	161.49	209.608	110.268	59.7034	51.3539	135.924	125.501	116.141	97.4937	55.1503	42.1137
BnaA04g20260D	169.833	218.404	91.7017	72.2121	55.547	73.4748	214.062	197.737	93.4538	62.7283	38.8405	45.3573
BnaA09g19400D	166.191	146.625	130.33	125.301	77.6217	63.3528	197.561	143.711	107.424	84.5132	57.8618	32.7954
BnaC08g20570D	179.685	153.624	133.963	105.699	75.0569	86.1013	150.719	120.056	86.5761	90.3254	78.6889	72.5671
BnaC04g51470D	169.625	158.346	138.198	109.281	88.9902	79.0488	130.187	126.952	113.612	87.2166	69.1305	62.032
BnaA10g09900D	0.278323	5.89564	20.2389	46.2349	97.6423	290.541	0.52015	5.11423	13.2184	64.6839	186.517	601.685
BnaC09g30700D	73.2151	87.1845	345.853	227.378	30.8246	56.3739	64.5365	61.6033	190.911	159.095	22.695	11.8089
BnaA09g09970D	193.34	190.67	189.188	110.782	67.0402	75.5471	137.217	121.363	87.0444	67.148	41.5327	49.8869
BnaA10g28210D	376.757	202.668	22.3799	18.3778	10.4197	7.45692	389.342	216.271	50.4993	29.0237	6.76282	0.640339
BnaA03g21800D	291.13	176.688	79.0273	53.86	48.3634	36.3087	274.622	161.901	83.2264	60.7993	42.0833	21.3074
BnaA09g06630D	2.77132	60.7751	138.791	153.635	115.466	111.838	2.99399	72.753	160.131	208.935	154.369	146.824
Novel02152	150.796	199.31	89.7008	57.7671	49.333	37.2844	176.266	252.717	149.315	78.3127	52.7489	33.5302
BnaA08g20460D	132.23	183.432	150.889	92.0596	62.6766	58.9327	133.585	174.625	131.926	93.8272	65.521	46.7843
BnaA06g19150D	124.863	123.998	173.847	130.756	66.3841	74.6768	127.652	126.383	116.053	119.431	68.0429	73.9227
BnaA10g09410D	230.24	154.319	120.805	76.1231	79.5314	50.623	223.325	129.656	80.0169	71.5835	67.9722	41.5016
BnaA10g14510D	40.604	110.888	127.669	134.551	102.307	139.684	46.6649	100.688	129.508	128.068	119.528	145.495
BnaA06g27360D	52.9174	40.6488	135.484	208.739	113.109	155.684	70.0369	46.027	147.477	155.373	97.642	102.269
BnaC03g19960D	194.264	138.911	157.486	95.6506	63.8954	65.1708	223.829	106.37	79.4626	91.46	58.3471	50.1954
BnaA01g08920D	123.101	142.11	190.083	125.906	63.2173	66.2808	164.198	129.142	116.013	102.046	51.9323	50.7344
BnaC03g56170D	88.7497	135.318	217.533	139.973	80.6814	58.1776	102.642	144.048	171.902	102.375	65.2504	16.3838
BnaA03g31750D	115.447	114.402	154.87	123.736	110.103	74.4194	134.518	133.063	118.748	91.8936	94.3017	56.9805
BnaC05g20150D	108.532	175.317	185.947	73.2379	35.9423	68.6792	97.875	160.774	163.834	101.982	48.7306	101.607
BnaC03g26070D	270.666	184.51	86.7965	53.4107	40.8719	32.5359	269.705	181.841	76.4352	56.4157	40.7337	27.8777
BnaA04g21240D	11.2138	98.2502	49.2558	100.582	54.6492	162.511	13.6548	196.966	263.175	219.729	57.5271	94.141
BnaA08g13750D	2.64044	255.519	314.431	103.538	60.4494	48.6479	3.20683	210.375	203.982	74.1872	40.8961	3.222
BnaA01g01700D	63.9288	71.4423	89.6859	114.477	90.4023	143.724	63.761	99.1599	124.295	128.879	115.816	215.148
BnaC07g01460D	171.228	173.494	158.547	105.393	58.7969	64.6142	153.782	122.383	102.335	100.162	55.6714	53.5295
BnaCnng53320D	0.119826	0.0570394	102.602	158.797	202.359	205.082	0.341242	0.0438175	79.9028	135.115	229.22	206.049
BnaC01g42370D	137.317	118.17	190.985	128.673	73.7666	79.7862	145.856	119.088	110.706	89.745	59.867	64.1238
BnaC04g10550D	115.117	163.606	113.563	130.908	58.7486	110.871	135.583	144.413	112.246	110.778	48.4669	73.5192
BnaA06g04890D	81.499	95.6966	113.289	142.836	141.451	99.7957	124.048	112.944	107.859	96.5139	122.717	78.3353
BnaA03g59920D	0.213363	1.66565	109.117	217.692	222.138	175.032	0.0911423	0.866038	53.3807	125.628	253.74	156.9
BnaA01g01800D	55.3632	131.062	109.275	143.098	135.457	163.112	61.3326	104.599	120.769	119.32	87.2906	85.3724
BnaA05g34620D	154.348	134.129	239.744	120.499	64.8221	60.4502	120.124	97.4963	104.434	105.915	60.9153	52.7767
BnaA09g41740D	517.174	107.283	8.8031	6.10613	0.450427	0.942655	524.106	127.531	10.7615	10.6538	0.654958	0.0595986
BnaA03g24720D	89.2683	157.206	176.512	111.602	72.6012	60.6646	106.52	155.614	176.132	99.8256	72.4975	35.6389
BnaC07g29680D	74.0526	48.1245	132.754	192.426	113.984	154.54	83.6786	50.7689	123.755	145.166	93.4268	101.014
BnaA07g26920D	220.887	128.286	85.3078	91.6972	45.9655	65.6291	247.849	126.552	84.3322	110.415	47.265	56.9507
BnaC07g27610D	165.982	105.476	147.229	134.688	93.8383	69.7213	180.739	91.9376	96.7717	97.412	66.5564	59.5506
BnaC01g22900D	185.529	210.994	67.3679	79.133	39.7084	75.2565	197.548	200.783	122.526	81.0165	28.5316	21.3147
BnaC02g26080D	163.948	165.666	100.782	89.2669	75.3237	71.8559	139.076	131.164	101.908	116.227	74.4331	79.7697
BnaAnng21950D	23.9517	384.161	84.9682	79.3531	35.538	72.2624	45.9403	275.857	132.142	73.0004	39.6616	61.9894
BnaA02g36030D	37.6463	185.39	212.554	124.522	46.0951	58.6198	47.4426	148.91	221.945	161.876	49.7902	13.8883
BnaC04g39270D	173.616	160.46	154.652	98.2054	57.4425	62.1488	185.271	115.561	86.695	79.6228	73.9635	61.0318
BnaA05g11320D	110.006	155.542	136.951	129.09	87.0628	82.1486	121.503	150.653	109.474	90.8288	67.9736	67.2593
BnaA08g17660D	48.3435	78.4282	258.793	297.287	18.0044	84.5459	68.169	81.3845	168.248	186.956	11.0927	5.23979
BnaA09g51850D	143.284	134.96	195.571	111.638	64.2218	46.986	178.385	111.759	106.616	102.592	54.8946	55.0768
BnaC03g24020D	127.759	144.884	156.712	110.784	61.2403	70.1137	137.054	129.097	113.555	107.018	67.7562	79.1925
Novel01121	95.2726	135.596	213.272	92.0866	53.0446	86.8784	86.7265	127.811	150.976	101.248	55.5353	105.291
BnaCnng52420D	672.666	71.1557	0.646131	5.89949	0.228472	0.0858211	513.461	35.6489	1.35328	2.04696	0.0704702	0.0705376
Novel00402	9.26629	3.57947	39.7357	132.366	163.927	208.1	9.4215	2.95543	24.1665	145.39	212.396	352.017
BnaC04g40760D	1.3476	7.37021	138.597	245.018	191.262	111.752	1.2248	7.23449	107.288	208.618	228.355	54.2914
BnaA01g20600D	172.465	140.337	175.943	92.5565	58.8857	52.2897	164.858	125.908	98.8907	91.1234	65.4139	63.3869
BnaA08g00380D	116.187	88.4657	256.324	219.868	49.0227	80.6051	111.333	74.1238	121.738	126.413	32.5094	24.5602
BnaC03g39690D	187.749	169.197	111.136	98.5159	71.8379	63.4474	199.196	139.158	85.7899	81.8685	51.9323	40.9202
BnaC03g36170D	128.73	128.461	141.396	106.697	86.941	79.3914	161.887	129.717	114.052	86.5646	72.3041	63.4299
BnaA08g19830D	117.708	124.737	92.1191	81.1235	70.317	88.0535	179.295	139.615	95.9035	90.9617	100.417	118.694
BnaC07g26240D	57.9106	108.831	102.734	130.523	60.8834	126.37	76.7825	139.346	171.806	156.104	64.7324	102.226
BnaC01g02520D	124.173	136.648	178.606	108.147	68.5268	68.584	166.931	148.251	119.219	74.324	50.2548	54.2186
BnaA09g51960D	32.9247	48.4496	256.822	189.469	59.2419	57.3099	49.2258	63.1774	295.988	148.976	61.1804	33.5513
BnaC02g33760D	156.085	137.257	180.073	121.981	62.8382	59.4285	152.189	111.605	116.303	96.3603	52.2807	47.2399
BnaA09g03890D	135.439	118.784	183.795	126.71	65.4565	64.0948	141.561	97.6481	98.9314	99.5413	77.7854	83.2775
BnaC03g42610D	245.595	155.057	227.843	99.2495	59.0703	45.2402	207.234	69.3988	55.6841	61.8613	40.5895	25.6334
BnaC01g39090D	113.617	134.062	178.46	122.668	90.9831	83.9527	115.829	127.27	110.182	78.1157	62.1475	74.4607
BnaC01g09230D	737.45	15.0079	0.969196	0.147487	0	0	523.946	10.3154	0.318418	1.80132	0.281881	0
BnaC05g25250D	113.888	84.8956	238.072	214.841	38.9842	85.1625	95.4941	66.4276	133.743	155.534	31.1861	31.8715
BnaC02g34580D	283.28	144.463	150.86	96.2445	68.7356	52.0099	205.357	91.9327	72.5361	51.5699	40.8766	29.9234
BnaA05g09410D	120.984	122.426	245.902	167.136	25.643	52.7661	138.116	129.985	147.586	105.238	16.7223	15.2773
BnaAnng31720D	125.453	141.302	180.987	109.195	66.2192	65.6256	119.766	114.31	104.409	97.1087	78.7965	84.1943
BnaC03g02510D	101.801	128.646	175.881	144.884	119.893	99.8311	100.346	92.3122	86.5843	86.8076	74.9547	74.2996
BnaC03g14940D	124.299	126.882	148.373	137.362	92.4253	108.331	117.419	93.9293	88.1786	108.249	66.6853	73.5566
BnaA02g12250D	221.507	186.028	90.409	76.4917	51.2586	62.6659	176.377	139.205	81.0788	83.614	60.5152	56.1655
BnaC04g49420D	191.873	163.536	111.619	94.0335	59.0458	43.4607	182.434	152.989	111.142	95.4087	48.3199	31.2201
BnaC08g42630D	53.7542	89.5765	107.58	67.4162	58.3998	52.381	100.845	196.239	187.967	157.014	132.166	81.5778
BnaC03g78230D	85.9007	142.369	117.781	98.4493	61.4271	77.4381	81.9407	131.398	165.102	150.374	91.3232	81.1926
BnaC02g38490D	140.404	172.315	267.445	90.8816	29.8921	48.5296	162.836	143.178	130.012	76.5312	14.7676	6.56965
BnaC09g35210D	138.845	133.297	174.856	116.07	71.003	69.0408	156.025	138.412	105.805	77.7194	52.5266	48.0679
BnaC05g17000D	49.1046	84.643	94.1829	151.997	155.814	92.8084	69.2383	117.959	166.496	145.671	119.91	33.7343
BnaC07g01670D	292.016	312.341	28.2665	18.918	1.68201	1.60384	298.68	301.535	17.311	8.2072	0.838065	0
BnaC03g21840D	58.2258	95.7857	138.968	97.4064	76.4086	56.6797	82.3635	161.785	151.307	145.668	134.836	81.581
BnaA10g11920D	94.5375	84.317	187.884	167.314	89.1014	90.3669	99.0619	66.9699	97.0514	125.652	90.9621	87.5013
BnaA08g04820D	122.897	79.1359	251.683	207.291	39.8725	65.0251	129.972	70.5427	165.051	120.136	20.0417	8.71332
BnaC07g25600D	414.313	286.388	31.5669	15.4536	2.78655	0.428202	328.005	162.857	23.6987	12.6644	1.87525	0.23463
BnaC01g19640D	28.8555	49.1005	121.002	156.668	127.903	154.721	20.0789	56.0531	114.049	194.979	120.703	134.539
BnaC03g68120D	168.184	137.374	178.515	113.954	77.8829	70.9278	172.557	90.4733	86.7987	72.9293	51.389	57.5618
BnaA05g33430D	183.167	239.323	131.459	64.7503	74.4016	36.8493	163.817	151.128	86.2664	60.0424	62.4285	24.5444
BnaCnng46660D	181.716	155.071	116.945	99.8202	52.2621	54.6437	180.304	144.614	91.2339	94.6122	48.3594	58.303
BnaA08g04600D	64.8297	101.835	271.781	157.919	57.2277	76.8385	58.1228	81.6059	144.641	144.923	67.601	50.4839
BnaC05g18090D	163.572	166.127	135.742	77.7453	64.9561	58.5588	188.724	141.37	100.397	71.095	54.1934	54.5412
BnaC04g49950D	165.228	159.996	164.413	100.182	91.643	68.8883	135.828	114.384	82.8768	71.7298	67.4022	54.0331
BnaAnng34410D	183.63	116.241	174.315	124.837	66.1397	65.1236	194.516	100.601	78.7164	82.2849	44.3099	44.9589
BnaC04g13040D	138.887	107.288	152.848	142.633	86.9138	107.47	168.358	91.3285	81.0291	70.503	45.6547	82.6549
BnaA09g48460D	0.110345	81.1004	93.882	164.337	131.754	203.716	0.510643	52.1328	187.943	220.971	78.2774	59.4397
BnaA10g26850D	167.132	160.785	192.907	118.386	63.941	61.7611	151.746	94.1232	88.5016	83.7585	53.6396	37.2583
BnaC01g16760D	267.954	145.157	165.165	103.532	53.1164	50.3647	199.659	91.4215	63.2469	68.7497	33.5619	31.8427
BnaC02g40440D	109.639	70.2485	137.936	159.414	66.1807	88.8779	83.7847	58.5041	89.3003	194.404	126.728	88.1464
BnaAnng39250D	122.972	122.417	203.416	126.563	72.3627	61.9518	122.602	108.736	107.774	98.0346	65.5288	60.0702
BnaC06g26560D	48.9402	50.0249	293.313	263.731	142.71	90.24	33.832	35.5927	129.171	103.624	59.0674	21.5097
BnaCnng62150D	260.229	143.652	89.8973	57.3212	49.4206	74.5785	197.597	95.1237	82.5399	91.135	53.9814	76.2235
BnaCnng73880D	160.783	157.678	167.95	125.508	90.4483	58.4251	139.133	101.744	90.1529	88.9946	54.3263	36.5016
BnaA09g45320D	217.931	180.165	160.222	49.9013	69.5231	44.5143	202.804	104.588	63.9039	51.4857	68.7177	56.8505
BnaC04g09440D	211.041	166.078	120.114	84.6918	57.3064	47.5438	182.43	126.582	84.0335	95.5704	51.844	42.8384
BnaA02g20220D	212.525	167.618	114.187	74.1458	49.069	76.4276	174.236	126.845	79.712	94.4217	42.8019	57.7511
BnaA05g00500D	295.164	171.287	77.9766	44.1276	35.5335	31.9515	253.08	162.083	70.9483	53.3553	41.3691	32.4496
BnaA03g57280D	5.11763	10.775	82.1998	185.059	141.684	295.138	5.67546	6.26196	37.0527	122.142	111.142	266.876
BnaA09g07840D	87.8854	82.0146	228.32	264.555	35.8817	61.202	89.9665	76.619	169.551	139.935	21.6667	11.3458
BnaA03g43250D	660.115	85.9098	1.86099	5.46164	0.125342	0	472.117	37.0758	1.96524	2.29089	0.463929	0
BnaA02g13310D	47.2811	109.299	126.016	140.801	129.428	118.393	59.6071	111.827	130.767	111.701	111.238	70.3873
BnaC05g14230D	164.281	143.744	159.215	98.6658	51.5108	53.7196	152.654	134.63	109.879	96.3927	53.4446	48.5635
BnaA10g23330D	121.638	162.889	76.9902	112.669	85.2875	111.206	111.49	156.168	123.368	106.501	59.7815	38.1366
BnaC07g15270D	128.431	122.123	61.9676	78.0153	53.6231	119.15	130.316	124.921	85.3893	99.2694	65.7216	196.924
BnaA09g03060D	211.761	185.403	128.756	80.7388	33.6303	42.2438	226.594	114.924	93.6863	82.6793	42.2532	23.0757
BnaA05g31900D	0	0.0717254	4.7524	28.9278	131.656	248.424	0	0	5.37797	35.1969	215.852	595.371
BnaCnng36560D	0.175067	0.16667	46.0135	70.9919	131.474	285.841	0.0747835	0	26.6063	73.3084	162.696	466.873
BnaA03g40630D	161.856	132.726	191.329	101.138	57.8723	72.6875	172.136	99.3782	74.0961	76.3886	52.1115	72.48
BnaA03g46130D	136.371	136.162	105.762	86.7627	60.7859	92.3162	137.971	117.63	111.573	91.178	64.4227	123.088
BnaA03g30850D	140.969	118.896	139.466	124.786	79.2162	61.3536	162.391	114.33	108.695	92.9531	70.3797	49.9459
BnaA02g15720D	136.608	163.294	158.264	96.2149	58.9237	71.1536	145.527	132.319	89.0799	80.4214	57.3932	73.7634
BnaA10g00050D	110.561	95.207	95.8366	69.5179	62.2639	65.9786	209.052	147.509	114.211	106.099	90.7183	95.5922
BnaA04g23760D	115.87	164.066	128.901	80.5131	66.7891	107.107	99.4906	89.6787	104.436	97.3892	83.945	124.348
BnaC04g13850D	192.459	120.827	130.764	89.8379	60.5359	68.9504	230.712	119.239	88.2854	70.8276	48.4062	41.3094
BnaAnng01240D	78.2915	139.189	70.7421	86.2887	74.633	89.39	75.5625	175.999	158.569	153.18	89.2204	68.8542
BnaC04g03340D	117.465	134.805	95.6078	83.498	73.7384	82.9429	119.677	151.053	138.748	97.1857	74.362	90.6622
BnaCnng06270D	250.895	195.283	64.2273	76.0717	40.8719	51.4373	213.174	143.314	72.9704	85.3186	42.1447	23.4873
BnaA01g20630D	134.89	116.562	164.23	105.82	72.139	62.3617	150.646	123.836	107.79	88.6825	69.8179	60.6242
BnaC06g29440D	150.685	101.792	69.4681	73.55	132.437	135.089	116.516	68.534	51.5678	79.642	126.165	151.85
BnaCnng13330D	94.0692	111.802	69.8315	50.4898	65.8464	79.4751	65.4604	103.196	115.643	135.477	151.859	212.683
BnaC03g45040D	36.3093	78.1235	274.98	205.62	44.0471	62.2756	34.6636	80.5719	194.278	169.293	46.6012	28.197
BnaC04g45340D	185.324	116.795	147.148	81.6635	62.081	44.6391	236.422	108.387	79.9173	79.5669	59.3172	52.9631
BnaA04g06460D	62.4812	137.426	147.706	122.3	73.6632	67.5493	74.2883	161.496	164.78	128.148	62.5824	51.1899
BnaA01g34450D	1.33071	71.7406	154.398	180.318	93.1949	165.406	1.65244	43.1495	173.128	235.281	79.8641	53.9251
BnaC07g40890D	44.2617	126.476	92.9946	166.603	117.424	140.507	44.7876	119.496	106.62	147.509	80.8196	64.2436
BnaA06g08370D	47.3766	72.7279	150.905	166.902	92.0396	72.5577	57.22	104.412	179.213	156.724	105	46.4078
BnaA07g04730D	613.672	107.375	15.8651	8.34499	0.487818	0.366479	419.669	67.5319	12.4075	3.84607	1.05324	0
BnaC07g33510D	0.356223	0.904363	41.5429	137.792	187.948	246.876	0.443824	0.781571	26.5905	99.5569	192.551	314.178
BnaA06g20770D	209.032	152.38	106.103	67.5525	39.749	41.2886	229.916	133.845	95.8152	92.4471	48.1652	31.6817
BnaCnng23850D	212.914	192.68	128.504	81.5931	44.6934	42.9202	206.038	129.878	91.0372	62.1835	31.6563	22.9455
BnaC07g26280D	31.6564	51.3891	109.951	131.341	82.7398	153.691	36.1544	60.477	113.821	130.369	123.339	221.76
BnaA07g25510D	136.063	141.019	154.709	102.804	42.1587	55.4866	115.335	128.14	153.641	127.488	44.4832	45.0925
BnaC07g20640D	164.447	138.926	182.961	107.165	64.8189	44.7527	141.627	112.197	109.005	83.4768	58.0083	38.7092
BnaC02g25640D	12.4848	54.068	58.5742	50.5863	81.9131	142.756	11.0865	60.4415	79.8399	107.994	189.352	395.957
BnaA10g04280D	155.934	158.016	120.613	73.1037	55.1182	58.613	143.005	140.523	118.066	98.9037	48.6676	73.3409
BnaA06g16250D	110.297	88.1754	152.948	101.036	61.2106	60.6585	146.983	124.357	130.697	116.431	77.6711	72.1999
BnaA06g36430D	164.643	157.064	134.122	84.295	88.6502	74.8552	194.159	110.18	66.7378	51.6151	51.4677	64.7089
BnaA04g15990D	149.555	143.578	138.678	98.7799	70.5998	60.9588	152.28	117.083	87.7087	93.1906	67.594	61.5438
BnaA01g04620D	107.442	145.928	115.792	90.0342	80.4013	77.6603	94.788	136.115	112.519	111.175	90.9405	78.4262
BnaA04g07250D	66.687	67.1757	238.632	207.026	61.9692	79.3861	73.2851	79.2039	162.364	134.719	45.0432	25.1268
BnaC02g10080D	110.866	263.977	94.9082	112.405	58.5856	63.0547	76.7317	175.708	137.693	95.7246	31.7149	18.6507
BnaA08g05660D	295.456	216.611	30.7903	15.3174	6.70367	4.89129	351.74	253.131	41.8914	14.3108	6.71627	2.16645
BnaC04g36280D	106.746	124.644	122.688	114.267	65.9058	88.9986	151.957	144.296	113.006	82.9398	50.9803	73.0362
Novel02985	91.3342	130.523	109.196	90.7985	60.8201	105.266	90.5664	119.366	152.463	110.431	59.953	117.569
BnaC06g14570D	18.4434	19.0445	164.9	214.266	166.116	134.365	13.0298	20.2329	82.3255	151.041	132.744	120.713
BnaC04g00140D	61.3773	181.994	181.293	110.229	52.6816	89.8816	42.018	124.715	169.976	106.603	42.7033	72.8636
BnaA10g20610D	26.218	92.1926	54.9138	3.08201	21.6591	179.076	34.0955	55.8226	50.2289	6.0928	47.7697	664.598
BnaA01g27820D	204.282	141.442	103.954	74.8384	54.3329	47.6677	199.313	126.939	92.2028	83.0939	59.3543	47.8375
BnaCnng19300D	68.6088	130.684	113.178	102.453	72.861	76.028	78.8207	154.664	166.37	148.55	70.7475	51.9841
BnaA05g08370D	205.498	170.131	115.652	72.2539	56.3803	41.532	188.42	122.328	85.6695	88.2792	53.9208	34.6965
BnaC04g39150D	141.407	126.391	186.205	124.639	63.7072	62.5631	118.12	92.6104	84.479	109.999	59.5375	64.7645
BnaA03g55570D	0.0910347	0.231115	46.2944	133.151	272.143	272.061	0.0324062	0	17.329	77.8722	202.52	211.94
BnaC04g39140D	101.101	112.812	192.717	140.263	69.438	68.1441	103.138	100.834	118.565	107.779	68.7205	49.8328
BnaC08g32440D	0.102095	62.8223	245.879	206.351	46.9319	111.604	0.43612	56.8217	268.908	201.145	21.2974	9.89504
BnaA06g31110D	50.9083	121.39	93.0163	120.884	145.71	61.7074	116.343	214.356	89.8604	81.2591	108.951	27.5141
BnaA10g00730D	28.8582	72.7525	271.121	214.529	72.0562	83.7718	32.1026	65.281	158.736	131.125	57.8618	43.4053
BnaA07g33310D	79.8614	84.2141	142.085	139.603	49.398	101.091	76.2602	64.4618	160.727	157.522	72.7245	101.448
BnaA08g00900D	109.56	155.437	89.6745	82.7369	67.5475	80.4895	92.8993	119.329	147.462	121.555	80.7506	81.4988
BnaA01g33010D	53.1373	104.027	209.817	163.581	66.7006	97.0609	51.2161	89.0965	159.719	122.66	51.7126	59.9626
BnaC05g46950D	101.986	117.041	171.227	133.383	75.34	86.1144	92.3721	81.0267	83.9127	108.321	88.9081	88.9932
BnaC09g31160D	34.2889	49.3198	78.4463	121.631	179.811	192.333	32.3878	45.2204	50.6307	86.9293	173.733	183.465
BnaC03g11480D	148.476	162.008	226.015	91.2426	25.252	59.7774	151.414	142.29	118.246	67.7814	12.9377	22.6038
BnaC03g37680D	35.3903	189.775	141.234	33.9701	33.4739	74.0474	39.0487	148.595	293.939	42.8841	32.4622	162.946
BnaA05g04890D	114.691	102.007	91.6839	114.838	68.3304	71.0179	206.747	203.5	92.2652	63.9703	53.7757	43.9918
BnaA02g12810D	109.482	160.46	168.138	110.689	37.1564	57.6661	91.8554	154.937	150.654	132.353	36.7064	16.4725
BnaC03g28790D	0.0717122	0.045515	3.23914	36.2802	159.745	290.778	0.0255278	0.0786702	6.4126	44.1888	211.454	473.526
BnaA06g04670D	47.9263	110.695	77.6136	124.312	113.325	140.604	53.3056	98.2695	196.338	138.556	75.342	49.3807
BnaAnng02840D	180.555	128.297	146.906	87.7124	63.3409	58.578	160.154	108.911	88.6463	87.3491	52.3757	62.1442
BnaC07g46180D	0.132147	1.88713	167.515	228.825	103.08	139.343	0.0235206	2.17453	117.483	212.361	120.906	130.526
BnaA07g20620D	83.1241	127.034	154.698	121.649	79.343	80.7869	110.27	151.982	128.233	88.1782	50.8935	48.0386
BnaC05g42430D	191.102	135.743	130.428	92.1527	56.4137	60.2263	179.539	117.662	79.8754	84.173	46.7062	49.5009
BnaC03g46680D	146.384	188.313	73.7874	63.0734	50.4845	62.8569	137.247	207.564	119.347	75.0908	45.7743	52.7527
BnaC09g12890D	118.37	151.187	104.358	103.104	87.7025	77.8092	118.228	134.037	106.529	98.7623	74.652	47.8335
BnaA03g41740D	203.293	139.449	108.809	76.1139	53.8274	45.734	229.873	121.614	87.3728	74.2525	48.4901	33.3029
BnaA01g30490D	39.6861	179.391	166.09	14.3899	32.6236	23.1828	51.7005	198.354	364.361	32.5108	38.4141	81.0277
BnaC06g43320D	129.515	136.608	154.743	114.94	76.9669	100.293	131.429	97.4922	74.3886	70.453	49.4523	85.3442
BnaA04g11290D	167.959	141.377	155.127	113.056	52.0797	63.5612	123.771	106.733	85.4878	110.367	49.9303	51.3712
BnaC01g30810D	164.997	167.011	184.539	94.3468	60.5549	51.0691	141.131	109.258	86.1641	76.2766	48.0076	37.2704
BnaC08g37220D	127.232	136.84	161.767	105.756	67.64	66.8754	116.215	112.65	105.705	98.1543	63.9629	57.764
BnaA10g02610D	155.469	123.661	162.159	85.3969	50.3325	58.5384	180.684	119.695	94.4847	74.6231	55.6714	59.6662
BnaC01g03340D	174.283	118.606	128.878	92.0137	64.1752	46.4012	169.739	121.158	118.951	94.1816	63.726	25.8073
BnaC08g18860D	38.4598	147.586	193.126	163.181	51.9769	69.546	46.725	169.507	156.506	106.295	48.3825	24.7602
BnaC01g05230D	44.5113	86.4527	85.5212	90.1264	62.534	106.494	52.9553	149.973	186.318	157.158	78.93	114.22
BnaC09g43250D	60.7725	159.391	79.8212	77.0881	51.8081	62.7994	74.0923	252.786	185.359	121.658	55.6714	33.8007
BnaC04g29170D	482.616	170.775	8.27339	7.3251	0.709205	1.70496	357.183	155.322	19.5952	10.141	0.896868	0.197062
BnaA10g12850D	119.755	168.671	125.02	84.3638	68.0353	73.1002	116.136	137.321	117.453	82.095	59.8573	62.9312
BnaA05g13990D	89.3242	132.407	107.311	91.886	78.8691	90.6499	119.628	162.67	127.572	80.941	61.279	71.6461
BnaC07g47630D	100.591	136.465	207.497	102.708	67.8152	66.3878	113.897	130.717	127.593	87.0428	47.0472	26.4129
BnaC01g43700D	0	0.0196601	1.37501	18.171	55.5467	460.954	0.0220533	0	1.26013	21.1292	82.9283	572.585
BnaA08g14120D	0.0902823	0.0859519	161.886	262.399	469.679	138.063	0.096415	0	25.0511	23.9491	123.673	7.64488
BnaA08g05650D	150.173	396.699	18.0917	25.0728	5.63564	3.20399	183.755	347.387	44.7908	25.8735	3.57049	8.04129
BnaC05g14950D	0.176909	48.8851	297.431	262.135	40.2394	110.289	0.0944633	35.7097	278.233	122.192	9.69179	5.45967
BnaC03g17510D	170.993	100.968	135.409	112.955	78.7149	77.9685	147.448	93.5425	89.6148	84.9874	56.7539	60.3684
BnaA09g27390D	0.0678519	11.4014	168.827	115.393	152.615	167.812	0.289844	13.9194	114.487	87.9058	179.324	195.833
BnaC09g27990D	133.292	145.519	161.881	109.28	60.3583	73.2663	128.799	106.021	81.1452	87.7405	52.6185	66.5102
BnaC08g33220D	0.538357	29.2358	103.818	87.135	103.305	120.061	0.622837	37.5764	242.149	256.849	147.786	76.8475
BnaA09g26590D	0.0200076	0.0380959	91.9219	167.581	157.044	178.934	0	0.0219489	73.2076	152.753	191.016	192.73
BnaA02g23000D	128.055	142.945	134.062	92.7588	50.8054	58.6835	139.249	153.496	115.783	88.7606	50.9084	49.4093
BnaC05g35350D	93.8272	117.528	135.401	102.683	70.0563	69.296	140.782	156.234	120.837	82.5414	55.0225	60.5793
BnaC03g34830D	156.815	131.176	193.474	97.7222	43.2794	54.895	148.274	117.908	92.0998	91.8094	43.8188	33.2551
BnaA09g29100D	83.7235	183.141	135.088	93.576	30.7402	83.7949	118.303	174.144	153.19	60.439	21.3987	66.6085
BnaA08g29200D	230.014	116.45	75.0197	75.2639	49.3468	38.0426	198.09	128.799	127.808	100.129	45.1276	19.7851
BnaC03g15390D	117.802	132.405	163.282	115.493	65.3714	71.6842	116.389	122.784	106.431	83.8242	55.4761	52.9222
BnaA01g29770D	91.9957	141.246	123.007	99.4749	67.011	88.8441	110.137	153.472	129.003	80.3771	51.1422	67.5713
BnaC06g39650D	0	0	3.06912	17.551	92.9119	420.008	0	0	4.29864	24.7273	126.987	513.655
BnaC09g39010D	212.932	140.573	4.39316	25.8816	208.799	50.3488	207.984	85.0674	7.62898	32.8721	179.061	46.2241
BnaA07g38860D	95.2097	113.954	95.7631	78.3964	69.5001	66.7466	147.537	153.727	142.581	92.1188	70.0692	75.997
BnaA09g22240D	180.773	199.018	97.3415	94.8897	37.9757	64.6528	120.769	123.82	127.838	103.908	24.9408	25.5442
BnaA06g38220D	486.996	148.466	14.9804	15.6197	9.67859	10.5137	397.75	68.5177	6.56218	12.7493	14.6843	14.5369
BnaC05g27040D	198.836	146.068	164.656	42.954	19.935	31.1671	215.564	160.623	124.743	65.07	23.8473	7.56858
BnaC03g11010D	487.397	76.363	50.1703	20.7492	6.75817	8.35874	441.399	55.9805	22.5706	23.9242	5.79593	1.5267
BnaA03g49650D	255.448	123.835	102.979	101.476	77.5139	45.7247	257.335	64.519	44.1675	61.3745	45.1845	18.9205
BnaC03g33960D	141.806	114.995	128.678	119.04	67.9879	60.4259	151.35	108.723	105.785	93.7055	60.413	45.5544
BnaC03g04250D	168.462	86.9236	172.879	41.5774	30.3988	13.5597	292.883	162.479	129.085	65.0924	24.847	7.7428
BnaC07g13790D	150.176	130.58	119.886	94.8637	91.7447	57.2002	164.534	121.678	96.0421	66.617	64.8007	37.3633
BnaCnng30080D	117.207	67.3845	64.2042	59.3498	57.2814	31.0744	197.354	126.832	93.2832	120.878	139.527	120.273
BnaC03g20620D	118.773	214.425	85.9339	49.5234	27.7336	42.2608	146.526	247.249	116.992	72.5103	32.7448	39.5533
BnaC03g41970D	179.095	117.625	116.647	115.694	86.6026	67.9896	183.866	79.5001	52.9673	70.8789	61.317	61.5326
BnaCnng54660D	462.22	115.618	59.4965	21.6385	5.78202	2.81761	347.865	103.966	35.119	29.0657	7.37466	2.46057
BnaC09g47460D	84.1254	123.291	120.303	102.473	89.8864	76.6067	101.207	126.396	116.423	91.5526	94.8793	66.2029
BnaC03g26110D	133.302	119.506	121.583	109.939	92.7932	51.0778	175.709	120.135	93.9841	78.7318	70.3578	25.5035
BnaC04g13550D	153.83	148.928	125.527	90.2792	92.2518	52.763	130.074	108.427	83.7645	80.8768	88.5441	37.074
BnaA05g27530D	108.835	92.1805	168.272	130.555	92.8248	78.7475	124.488	95.2028	86.402	89.9146	61.1348	62.647
BnaA08g29120D	439.642	148.786	44.4034	15.5749	3.43796	1.38365	370.819	113.849	34.7807	15.973	2.04507	0.341172
BnaA06g24650D	59.5434	87.9842	105.922	110.306	63.1972	89.4356	74.8222	136.128	159.846	141.027	81.1589	81.5003
BnaA05g00730D	95.7365	125.545	107.207	96.6049	58.5775	82.774	120.188	157.9	139.527	100.224	47.4125	58.7253
BnaA02g14900D	181.509	187.775	110.503	78.0394	41.3216	34.1228	185.762	149.34	103.315	73.1425	32.424	12.7371
BnaC07g45190D	180.434	112.287	125.881	90.4471	92.3878	62.2828	181.617	75.5607	85.591	71.8101	63.2201	47.3188
BnaA06g39290D	353.664	150.542	36.7559	23.7978	13.3337	6.43956	388.589	135.388	50.7957	19.0305	8.68388	1.76426
BnaA01g31400D	213.695	109.273	125.513	87.9448	64.1202	51.6384	175.792	81.0978	75.982	87.8992	71.6865	42.5951
BnaA05g20440D	143.768	128.643	86.9276	109.593	86.9898	81.7316	162.979	102.854	84.2347	87.9167	65.9885	45.2188
BnaA02g30900D	43.2748	116.482	159.728	97.0996	56.1493	35.4164	42.6568	165.309	174.317	127.229	116.37	52.0723
BnaC04g01200D	200.819	112.41	110.234	86.7664	68.8689	60.586	218.928	91.283	71.451	74.8681	58.0404	31.5378
BnaA09g15190D	96.7285	119.823	232.097	153.235	67.3839	77.9068	78.1283	63.7699	76.5323	95.5753	49.9356	74.2996
BnaC03g14010D	65.0121	102.099	149.709	131.719	74.2515	126.337	79.2449	88.273	101.234	104.125	64.09	97.858
BnaA07g04790D	116.008	104.74	162.807	107.57	57.7577	68.8047	134.124	106.697	112.954	96.6085	54.9531	60.6141
BnaC03g15540D	137.345	103.206	35.5896	29.0211	14.2553	18.3897	239.758	273.895	136.428	129.88	39.5723	25.6128
Novel02291	9.08192	132.618	55.6882	97.969	115.522	136.319	13.8752	114.345	127.078	155.93	146.129	77.9816
BnaC03g14720D	161.438	143.665	88.6283	107.641	53.7028	86.2993	126.379	136.947	90.6959	96.122	41.7307	48.7019
BnaA02g34760D	67.5133	64.3687	258.096	235.759	32.1599	66.0884	68.1055	66.1824	163.583	131.233	18.5906	7.63077
BnaC01g07700D	51.6023	106.602	155.316	148.863	101.963	117.577	34.2311	63.8626	67.6869	99.0685	98.89	133.299
BnaC09g35230D	170.314	133.039	180.796	77.4159	20.8354	47.9596	218.448	137.696	113.282	48.8819	7.99576	22.0655
BnaC04g42330D	91.7933	102.991	176.351	128.976	67.3505	85.125	93.3297	91.2122	100.969	103.854	75.0018	61.7616
BnaC03g36410D	153.745	169.265	109.711	76.5558	69.6129	62.8844	148.216	111.557	76.8157	73.1058	67.3288	59.3898
BnaC04g29680D	193.866	157.356	97.9806	66.3177	64.3675	56.1893	140.394	97.1039	90.5409	98.4435	58.4169	57.1751
BnaC07g43690D	596.51	82.3549	6.67731	2.84513	0.419751	0.315343	405.605	68.4208	5.99626	6.0171	0.647342	0
BnaA02g08820D	65.7627	168.815	133.321	48.5479	33.5917	39.6475	76.0206	166.062	264.606	69.2539	47.3005	61.8221
BnaC07g01470D	168.754	136.444	155.799	76.5172	51.0049	52.0127	158.452	99.6289	90.8584	74.3382	57.8318	52.3979
BnaC07g33700D	177.416	117.387	134.464	118.241	64.5094	57.7544	165.379	85.9969	77.3284	81.6933	51.8569	41.7935
BnaC04g22010D	57.2183	95.8484	177.632	148.493	51.4666	74.0258	55.3511	108.915	162.055	139.193	56.3673	47.154
BnaC04g10140D	101.919	85.9443	107.137	98.8456	69.817	40.2322	111.662	142.229	133.377	114.156	100.943	67.1146
BnaA01g20380D	70.3531	89.1522	121.32	115.551	71.0955	91.5043	85.0319	116.655	132.839	108.505	74.5684	96.3606
BnaA03g30560D	102.942	114.174	160.026	106.309	70.3526	64.8294	99.0351	95.6977	92.2657	104.25	89.2368	73.7844
BnaA07g11360D	153.514	135.16	36.316	45.4952	38.0755	106.828	145.934	150.081	68.7043	62.4796	50.0252	180.195
BnaC04g48420D	0.0172578	0.821499	0.604791	0.51539	20.7581	151.363	0.01843	0.567966	0.953745	6.17205	146.733	844.04
BnaA09g09740D	640.991	35.483	0.875761	2.39884	0	0	467.564	23.9682	0.739854	0.507324	0	0
BnaC03g25850D	167.062	160.014	119.954	91.7971	62.313	55.6918	142.578	111.452	74.2972	76.5118	59.1708	51.1871
BnaCnng34020D	64.9077	71.1546	126.654	135.546	82.8261	80.0024	83.7051	95.673	141.078	134.758	94.6414	60.9257
BnaC08g08290D	52.3989	497.887	72.6733	39.0029	9.68746	1.60878	66.6359	356.577	37.5194	28.724	5.09535	1.51118
Novel04416	134.47	94.7638	178.801	113.577	64.0258	62.3592	125.554	83.0301	69.9511	96.9702	77.8124	67.8277
BnaA04g24550D	93.9478	139.709	96.5589	66.0251	57.3566	71.4146	83.9968	123.836	112.778	136.267	75.342	111.449
BnaA09g34930D	58.59	79.4226	168.438	140.68	64.2655	72.4203	70.0723	106.624	144.095	134.443	74.8611	54.5063
BnaA06g00460D	65.1425	292.573	103.768	87.5088	52.5645	27.7618	70.4885	216.092	120.479	86.4721	40.7866	3.81274
BnaA01g12190D	83.1591	108.275	184.492	124.102	75.8349	97.3357	70.5399	80.5442	75.8551	96.374	66.0289	104.711
BnaC01g31270D	10.4328	45.3793	257.783	210.493	51.4831	82.6721	10.8992	49.4292	193.167	160.501	51.2986	43.4614
BnaC05g21780D	185.711	86.7847	81.4994	102.611	59.1531	112.922	140.387	71.5017	54.6435	110.669	57.8234	103.208
BnaC08g47880D	141.637	115	136.46	113.569	73.7185	61.5643	188.135	108.086	84.7175	61.7595	41.8922	38.986
BnaA04g04590D	158.482	158.331	127.23	58.2574	46.3354	55.0485	195.366	165.452	100.245	47.4992	30.7439	21.6245
BnaA04g17150D	0.375699	3.65932	119.88	254.514	153.212	92.8375	0.678986	5.07263	97.692	198.946	194.526	42.8402
BnaA06g35970D	139.161	104.778	124.754	98.7768	78.6625	51.8103	188.575	112.328	92.0786	74.4347	64.4791	34.3497
BnaC07g47930D	168.78	125.939	179.148	107.224	54.5154	56.0701	144.571	79.4572	84.6859	76.9967	42.7113	43.6839
BnaC09g37830D	122.315	122.984	79.3558	78.95	85.808	81.3584	110.415	95.8727	75.4651	104.06	108.97	97.6248
BnaA04g15900D	91.6069	89.1815	168.72	107.235	53.4172	64.893	105.163	108.028	98.2843	118.695	75.3155	82.5124
BnaC09g38260D	143.885	214.969	108.02	70.1227	63.2184	66.762	120.836	119.364	83.5039	66.8598	58.0549	46.7951
BnaA08g08270D	108.249	125.525	146.309	113.586	62.5451	66.856	120.717	125.288	93.2216	94.985	54.8974	49.8245
BnaCnng71090D	161.718	85.7955	112.669	118.345	56.4404	39.4266	197.517	116.464	135.622	74.4537	48.24	14.0534
BnaC04g22660D	116.289	108.587	114.85	103.736	67.2804	65.0284	136.231	111.594	101.161	100.712	69.6791	65.4316
BnaC09g46300D	86.3883	84.1999	126.998	128.306	101.172	79.0804	116.429	105.987	105.852	85.9519	75.0451	63.7937
BnaC02g44850D	24.6875	45.1987	221.199	200.301	64.7827	74.2401	31.7859	48.0601	180.696	162.344	63.3945	41.4531
BnaA03g06790D	97.2764	111.795	120.264	95.4631	59.1118	57.6023	108.012	147.314	155.396	101.012	55.9621	48.4645
BnaA09g43390D	111.097	92.1962	173.285	156.103	62.7659	61.7779	124.68	91.9397	112.518	94.6532	49.4379	24.2693
BnaC04g08780D	69.3811	142.216	144.942	124.075	52.9165	70.5421	73.5786	127.282	123.464	114.505	63.6985	48.0269
BnaC09g20030D	112.105	160.071	134.506	95.467	66.0836	55.1137	87.92	108.872	120.095	89.3055	69.4097	54.1968
BnaC03g08380D	594.599	46.6719	2.10927	1.92587	0.19889	0	435.892	55.6616	8.7315	6.2011	0.368076	0
BnaA05g06920D	265.177	120.845	141.162	80.22	46.0017	38.3992	206.895	64.7989	50.644	61.4783	39.2163	36.6896
BnaCnng51510D	167.338	121.651	146.172	93.2119	47.7668	44.3773	163.504	106.949	96.237	79.1887	46.7303	38.163
BnaC09g14300D	480.217	141.464	33.3351	4.8746	2.3329	0.968552	361.177	95.2613	24.77	4.48827	1.477	0.682344
BnaC02g45560D	90.0121	97.8044	79.1886	74.777	88.1859	105.599	77.2687	83.314	70.1239	97.8233	110.046	176.563
BnaA05g29180D	111.501	106.57	123.081	84.6891	47.6857	59.847	146.224	131.011	115.177	106.569	56.9773	61.2628
BnaA09g53260D	91.3353	121.613	133.42	116.652	47.4503	63.929	97.1543	132.334	147.637	113.654	44.5371	40.7421
BnaA03g53000D	162.844	109.378	112.146	93.8044	84.7398	64.8109	187.945	95.9743	81.967	66.7669	54.0673	35.5127
BnaC03g04230D	46.3621	52.4585	81.9772	67.532	63.8222	49.5744	121.935	152.246	132.064	116.224	124.615	140.917
BnaC01g06130D	76.376	122.823	133.774	107.247	102.553	84.209	76.891	110.683	93.7239	85.8899	81.3878	73.4237
BnaA06g39280D	75.2787	122.402	49.3265	90.8965	63.0953	133.077	66.4077	104.323	91.1063	170.749	90.359	91.5886
BnaA02g29010D	88.9071	70.2304	352.483	153.433	18.5225	37.886	75.1095	57.5865	186.449	89.1523	12.8023	6.01076
BnaA03g46420D	134.647	154.068	126.721	71.6702	63.3823	52.1892	139.181	142.694	83.8013	73.4087	64.4753	41.8583
BnaA06g39830D	98.4085	172.556	169.297	108.165	51.7412	48.815	96.2463	139.914	115.608	89.9106	42.4031	14.6742
BnaC05g00800D	115.675	124.483	169.26	124.235	44.145	68.6305	121.314	93.0789	87.7339	99.0497	44.6738	55.1777
BnaA07g26670D	36.3682	44.8936	111.689	137.078	130.475	94.9606	54.5643	59.8829	106.061	125.312	159.999	86.12
BnaC08g36790D	122.951	32.5006	130.993	207.338	60.1642	66.6461	136.611	35.1733	124.895	162.615	38.0793	29.3669
BnaA08g30370D	121.13	95.8739	120.372	99.9189	68.658	73.7809	168.523	116.014	95.3354	73.5983	46.6891	67.2443
BnaC02g41520D	196.751	166.116	99.867	77.924	14.2555	21.7647	250.291	188.768	78.6428	46.1439	5.41349	0.946492
BnaA04g24350D	115.108	110.486	124.46	109.035	67.072	69.2216	142.083	101.125	86.1792	93.1128	64.8813	63.7738
BnaA03g42820D	98.832	99.9698	174.633	118.752	54.7582	63.9174	126.088	120.188	120.307	84.3703	42.8428	40.138
BnaA09g43060D	109.435	112.285	147.148	117.649	65.1691	58.4388	119.14	109.448	96.8357	93.3051	63.4556	51.681
BnaC09g18810D	183.651	135.321	71.6079	94.8098	56.3137	71.5179	189.793	109.021	60.8752	77.0292	46.4459	47.573
BnaC05g28330D	64.7122	63.6137	303.176	166.256	19.3713	36.6052	66.2306	66.7455	172.701	149.556	24.7151	8.44617
BnaC03g46180D	112.796	90.6301	163.565	120.584	55.8668	74.9014	116.107	89.5953	92.4347	91.3788	63.4478	70.5846
BnaA07g35600D	4.02917	53.284	52.6685	78.4887	166.006	202.938	5.06041	61.8503	77.6866	79.3511	153.725	205.863
BnaC05g00480D	105.787	143.173	80.6748	77.0127	64.9637	82.4014	90.5711	106.628	97.1084	110.497	83.8719	97.3198
BnaC06g16700D	81.3757	88.4368	134.727	90.4274	67.853	59.7777	87.6548	105.277	119.763	115.532	104.266	84.9094
BnaA03g17310D	133.634	105.616	152.201	108.694	74.3399	51.8861	142.818	84.5453	98.208	79.6882	64.6704	43.4602
BnaC04g11470D	67.5462	84.367	71.176	71.064	61.5127	123.937	57.8031	76.6568	79.3955	108.485	88.8103	247.999
BnaA06g10600D	132.747	121.216	175.663	97.4707	60.8281	50.5918	119.076	96.1206	82.6646	91.2712	60.1251	50.8056
BnaA07g08680D	119.813	159.777	99.413	64.7409	77.6313	36.4144	154.671	195.611	87.1297	54.0423	60.1611	29.0308
BnaA08g27920D	173.16	149.954	137.023	67.3473	41.9016	40.1984	196.505	128.595	85.9909	58.1696	28.5069	29.3246
BnaC02g13060D	0.826197	105.225	219.727	140.503	41.0532	87.8534	0.686248	65.9628	215.509	215.033	35.4613	8.70991
BnaAnng10750D	230.425	160.428	63.9243	52.9745	49.4019	39.7949	179.631	122.483	96.9093	74.7681	40.4223	24.8858
BnaA07g37750D	123.764	147.595	187.901	100.817	55.4087	63.9824	127.42	90.3471	74.7119	64.6064	36.6698	62.0647
BnaA06g01340D	83.3194	79.6935	122.67	106.552	73.9691	74.5302	88.4527	84.828	90.7612	117.722	117.558	94.6129
BnaA05g04610D	12.6387	70.7026	108.898	198.101	29.7314	141.07	25.1373	66.1274	238.127	199.07	28.4099	16.5175
BnaA06g38400D	23.0726	26.9867	120.9	148.456	65.662	177.504	21.7736	38.6383	110.812	117.825	66.2778	215.405
BnaA02g30740D	2.17635	203.739	72.9346	91.1921	49.7503	72.9735	3.78813	223.791	206.366	147.459	41.1666	17.9357
BnaA08g20570D	126.041	175.667	160.747	59.5303	58.243	50.9345	141.465	135.249	88.4654	59.1395	35.087	42.0511
BnaA05g00550D	148.035	95.3213	167.803	136.515	72.7656	73.3507	129.706	64.0724	61.5011	95.9562	51.7262	34.5757
BnaAnng21260D	80.7538	104.843	159.437	87.421	54.6162	76.9738	92.5962	120.594	117.98	85.2123	60.0051	90.828
BnaC04g17750D	132.63	140.933	50.7675	52.3938	41.6582	90.2707	148.902	156.911	103.267	86.0674	44.5613	82.8256
BnaC03g28760D	150.266	106.769	149.299	99.9128	73.7464	48.7103	156.217	83.8886	74.4394	76.2326	65.8022	45.7278
BnaA04g07260D	241.851	117.217	51.572	61.8055	68.9853	52.2508	237.359	112.317	74.4248	47.3214	39.2212	26.6473
BnaC08g26140D	61.927	109.085	165.32	129.215	60.7833	79.0912	62.7575	116.257	111.863	107.945	70.7797	55.438
BnaC01g33900D	53.1758	94.0418	161.066	169.933	94.7666	105.249	52.8375	90.7684	111.833	101.27	43.8597	51.5085
BnaC08g20700D	140.853	113.045	172.305	91.2981	55.6301	54.8285	121.96	94.7727	89.5616	83.5578	59.0063	53.1404
BnaC01g38790D	365.353	215.065	20.0081	12.6584	2.07975	1.33923	301.305	179.317	17.3911	12.6173	2.61175	0.137592
BnaA05g34670D	56.9451	165.186	173.972	95.598	62.1484	67.6183	32.6716	102.948	130.893	104.905	76.1633	60.408
BnaA07g15950D	189.209	113.642	163.6	89.3499	43.8726	50.43	173.682	78.3005	80.5526	70.3528	41.2844	35.0001
BnaA03g38220D	37.6123	76.856	298.771	186.807	46.1818	48.5061	38.4838	59.4957	149.656	127.927	40.1962	18.4244
BnaC03g76150D	74.6393	114.246	97.5904	99.1833	71.1141	82.6466	65.535	118.373	121.09	110.254	79.638	94.1469
BnaCnng55040D	105.895	127.145	150.106	109.552	60.0558	55.9084	100.897	113.399	123.962	89.7804	49.5526	41.5007
BnaC09g36190D	169.632	130.149	222.33	87.6323	13.5581	38.8649	171.378	107.182	107.263	69.9679	5.64555	3.92428
BnaA09g43270D	145.115	111.047	129.257	112.193	73.6721	52.0081	156.365	94.4037	94.2502	79.6655	56.8926	20.9956
BnaC07g21970D	1.26048	64.5611	159.415	144.658	99.3173	59.6628	0.538441	73.8404	141.158	193.355	113.056	74.8426
BnaC01g19290D	126.299	116.865	127.275	85.9553	65.4418	80.5258	103.768	108.803	80.3195	73.0814	66.6104	90.0394
BnaC06g13950D	46.1974	84.7552	144.585	90.0393	62.9767	65.0214	63.5598	155.504	215.212	107.422	53.3373	36.1741
BnaA09g07180D	130.412	146.535	107.193	85.3371	65.2263	64.7126	107.973	108.849	90.6448	82.6169	56.9	77.4766
BnaA06g13900D	162.224	123.502	88.5832	59.811	53.0448	85.9913	153.411	101.665	61.1057	67.5946	49.7331	115.815
BnaA03g53350D	123.019	126.789	129.968	81.6346	77.2555	75.5717	130.632	101.292	68.1749	70.5343	60.0684	75.743
BnaA03g34240D	165.493	221.508	83.0423	77.5607	51.9029	42.1971	164.633	151.59	58.6638	49.0439	27.5864	26.7811
BnaC08g03190D	122.84	140.277	103.585	53.9584	54.8117	63.0995	116.059	132.011	86.2644	77.4868	67.6696	101.438
BnaC04g36720D	186.443	127.173	67.8391	53.7486	37.1589	55.8754	191.688	130.861	72.7183	57.9924	43.9399	93.8994
BnaC04g37590D	177.281	193.519	68.8749	50.6494	62.0873	29.72	178.616	170.732	71.5597	42.5319	51.2991	22.239
BnaUnng00560D	181.472	158.797	148.371	79.4736	51.5437	51.2032	118.752	88.718	67.0175	85.5372	49.0241	38.9241
BnaA06g40340D	500.091	139.812	7.68565	7.41458	0.341842	0.0770439	358.935	88.5869	6.36022	8.60001	0.822419	0
BnaA05g05540D	77.9283	81.5494	197.497	148.441	62.2494	62.8055	94.7617	81.985	137.899	97.6096	50.8881	24.6235
BnaCnng27910D	128.881	81.4486	162.74	102.769	34.0705	55.6101	154.414	100.586	105.142	104.366	44.9125	43.0771
BnaA06g25390D	130.453	133.209	102.939	99.2318	76.208	73.3355	147.092	107.657	85.5271	71.3679	46.4856	43.3724
BnaA10g13900D	99.9091	126.455	154.992	101.623	57.4549	60.2555	124.002	113.333	82.3785	74.1937	56.4088	65.6149
BnaA03g17100D	140.434	233.575	69.5806	38.2343	29.4926	28.68	151.443	222.218	96.6884	54.4431	25.1777	26.2071
Novel00646	113.784	103.332	175.021	130.734	74.2234	68.9263	101.358	92.0109	83.1528	80.2833	47.8473	45.3907
BnaA03g02830D	51.6591	69.8892	263.956	201.597	69.5766	71.4146	54.909	46.9244	117.502	99.7569	45.4774	22.9834
BnaC09g06980D	57.2426	82.0782	156.4	123.319	85.5776	90.362	77.557	104.501	115.713	96.6118	70.0124	55.8139
BnaA07g11300D	172.017	116.013	98.7636	80.0014	54.741	59.109	185.181	105.916	71.3907	72.7921	50.1827	48.7395
BnaC06g18420D	116.778	119.865	147.56	104.863	66.4853	69.086	117.844	87.4535	74.8282	85.1534	57.9969	66.7991
Novel03379	68.3218	116.958	82.0559	87.9394	71.424	90.7896	64.1316	128.042	120.119	103.892	83.3205	97.565
BnaC03g31650D	122.593	160.753	127.453	70.9158	37.1384	47.7102	143.307	148.543	97.6698	78.2595	34.7775	45.1301
BnaC01g44960D	138.893	129.854	141.101	125.087	84.058	81.2615	114.579	98.0983	70.2544	53.2256	39.0495	38.1316
BnaC05g06430D	153.081	97.0683	71.9792	81.332	113.093	96.3361	140.147	70.338	52.9406	60.5407	92.9313	82.5309
BnaA03g38740D	223.516	82.7114	113.38	90.8328	29.1056	43.5899	223.063	87.214	82.7745	82.1587	29.8469	23.5736
BnaA08g19760D	173.182	134.984	87.3643	64.2869	51.0765	47.6013	169.364	113.556	76.3446	81.3298	56.9951	55.335
BnaC08g37510D	0.0815236	0.23284	17.5227	84.3429	164.06	284.501	0	0	11.545	65.9389	166.848	315.427
BnaC06g01260D	113.429	142.049	104.428	96.5132	60.5653	65.0867	123.467	132.125	94.6458	89.1559	44.8155	44.0225
BnaC04g21140D	153.393	115.426	138.342	87.342	55.8798	48.3836	143.265	97.2345	94.6172	84.187	48.2907	43.44
BnaC09g48290D	89.6235	108.032	156.047	106.557	56.3337	61.8399	104.996	104.871	108.758	105.822	55.8255	50.9042
BnaC04g03030D	23.8693	36.7126	95.8038	154.499	121.592	92.8842	26.0157	45.6594	100.746	166.27	169.269	76.2314
BnaC04g19410D	1.02414	9.22203	112.258	126.209	149.189	120.793	0.820281	10.3222	73.7455	118.25	198.308	187.788
BnaA09g28100D	29.2672	69.3021	231.17	190.816	54.8038	61.5468	36.3797	69.2165	165.467	127.796	48.3179	23.7134
BnaA06g04530D	27.7672	152.145	78.9331	93.7627	83.2236	91.1214	26.6838	118.228	172.701	146.585	75.7941	39.2302
BnaC01g07450D	108.089	148.545	163.874	75.2178	61.1165	39.5736	122.845	127.054	146.315	52.957	36.7939	23.6797
BnaC06g20910D	21.2659	78.7506	197.981	139.885	46.4842	57.4628	25.1311	92.7644	192.469	139.546	65.2816	48.7551
BnaC01g07390D	480.942	66.0983	19.3864	18.2371	10.4018	4.36963	384.687	55.5375	15.4083	23.0943	19.1077	8.23757
BnaA01g16450D	16.7997	34.6396	88.5141	108.856	85.5722	144.997	7.9479	25.3528	83.2321	155.757	127.401	225.963
BnaA09g29110D	106.249	163.696	167.992	65.9187	24.0657	64.2694	111.868	125.258	118.883	64.1522	23.9463	67.3277
BnaA04g24930D	312.071	158.04	71.4358	28.1077	9.1797	10.9037	287.085	114.281	46.4201	43.0781	14.2335	8.73212
BnaA10g25120D	115.128	121.268	80.5311	72.0017	57.7109	63.7834	131.556	141.773	109.595	112.663	66.2112	30.5674
BnaA09g25260D	97.9714	88.8015	217.169	171.082	27.4414	52.1528	90.3736	68.1629	129.93	122.226	22.6716	14.4733
BnaC03g63730D	134.687	91.065	133.525	68.488	53.4141	42.9943	139.852	120.718	102.614	109.489	57.3008	47.7058
BnaC08g32520D	213.352	133.469	136.892	76.0878	67.2746	55.7798	133.631	75.99	66.2225	51.0611	43.0188	48.2948
BnaA02g08480D	72.4047	150.206	39.8894	52.8588	39.993	43.9425	81.6958	214.935	164.256	145.132	61.8007	33.5119
BnaA10g00720D	118.263	108.095	162.436	117.567	53.3327	59.9253	126.371	80.332	72.625	105.915	45.6147	49.9725
BnaA09g06380D	0	0.297148	14.7664	89.7165	171.554	162.717	0	0.342402	31.6235	170.95	211.551	246.781
BnaC06g01510D	99.3258	126.136	126.564	84.309	40.1712	61.6794	93.1503	137.295	112.359	102.499	39.2269	76.8144
BnaA01g07580D	581.746	17.2459	0.161533	0.294974	0	0	469.75	27.6089	0.955254	1.31005	0	0
BnaA07g01010D	147.973	160.888	126.257	83.6789	30.0821	53.2117	121.611	125.924	96.6182	82.5209	29.0166	41.2025
BnaA10g09430D	136.006	132.602	108.813	77.7961	62.2931	52.2571	162.519	126.432	78.3676	61.7482	51.646	48.1805
BnaC04g00340D	119.025	120.802	104.613	86.5539	54.4784	68.8417	119.611	127.808	113.267	87.7142	47.9631	47.764
BnaA05g32390D	182.889	132.862	105.279	117.874	40.4103	42.8262	167.799	99.2682	76.3036	83.9812	29.4131	19.225
BnaC01g26290D	104.872	60.191	64.603	104.863	60.9163	134.411	91.8715	57.6734	80.0244	171.897	71.677	95.0106
BnaCnng57830D	0.0624238	0.445722	0.0729205	8.75526	39.8459	366.81	0	0.342402	0.718715	20.9945	54.0808	605.553
BnaCnng25850D	244.785	213.41	24.178	15.4928	7.47321	6.3996	257.04	237.747	67.6536	19.7503	3.32048	0.320169
BnaA07g03870D	33.5622	419.516	137.604	54.1864	12.7577	14.0498	45.3999	219.756	79.1019	57.8258	16.9027	6.8481
BnaC06g22430D	123.745	100.006	160.415	134.486	37.0503	100.204	105.523	68.0452	77.5258	120.159	27.1752	42.313
BnaC01g25380D	53.9895	80.2872	115.23	118.719	89.1822	107.338	65.1347	102.022	118.396	87.1137	71.7781	87.3053
BnaC04g01120D	170.653	184.814	161.41	41.5675	23.4153	25.8368	151.03	149.315	93.8214	53.4953	22.5695	17.6211
BnaA05g29530D	86.6601	100.233	114.336	102.283	96.9088	92.643	94.0344	88.8753	89.6464	93.5094	65.2365	71.1332
BnaA10g00410D	96.8547	122.076	74.2033	65.6268	65.8207	90.9391	82.6939	108.915	100.262	95.0171	85.6801	107.353
BnaA06g09710D	0	0	0.911506	2.77416	115.008	237.526	0.079362	0	0.556148	5.72034	277.865	454.403
BnaA05g33140D	100.844	118.859	161.206	98.2847	56.4807	58.4821	129.043	98.0739	84.449	72.5163	46.1278	69.7507
BnaCnng55600D	144.464	136.952	76.328	63.7021	62.3009	50.4371	167.361	144.705	83.5758	66.2556	52.6537	43.5382
BnaC03g13870D	112.624	177.857	95.1662	67.8659	41.3073	60.9259	103.27	141.609	122.639	75.813	39.9309	53.1904
BnaC08g01880D	105.531	64.9813	203.008	166.189	56.9034	51.2372	92.2166	50.6351	126.735	121.221	38.8425	14.0801
BnaC02g19310D	511.055	52.6676	4.5809	3.4357	0.308535	0.173843	449.748	57.0012	4.03125	6.63424	0.428242	0.285768
BnaCnng72870D	100.042	132.876	147.088	142.731	82.4883	165.215	54.1865	43.9942	32.1058	49.1938	39.1165	100.011
BnaC04g41260D	110.701	125.209	88.6209	68.277	58.1261	70.9788	114.99	144.59	104.676	72.9432	60.749	68.9389
BnaC05g04590D	95.7933	67.7587	199.585	181.569	49.1341	54.0848	84.5801	57.3784	130.444	120.008	32.0532	16.1686
BnaC05g33370D	125.196	81.7562	87.1718	91.9737	68.4266	69.2766	131.634	89.2112	111.004	118.475	73.0858	40.4801
BnaA06g28610D	185.448	111.52	148.828	74.5415	69.7325	45.4169	147.304	65.5515	53.3408	69.2039	73.1107	43.5056
BnaCnng03920D	0	0.255219	0.156578	5.64704	126.456	269.032	0	0.147044	0.617301	16.1908	188.327	480.668
BnaA06g30540D	154.152	123.857	123.744	85.3266	57.4903	55.4716	153.193	97.5674	76.2273	69.7802	50.0481	40.5271
BnaA05g31250D	32.7725	44.8768	91.1141	143.546	82.6055	154.581	30.5655	40.9257	54.9008	130.855	99.7075	180.604
BnaC01g01400D	140.244	172.001	45.815	56.9747	39.8887	58.9247	145.988	153.374	107.467	85.1374	44.4009	36.0933
BnaC03g15020D	53.407	71.3021	76.2024	76.7844	66.1987	80.7272	62.3775	115.72	106.399	113.595	102.85	160.631
BnaC01g10480D	86.0502	73.3127	49.2138	169.615	59.819	90.1944	67.5589	70.6766	100.002	202.588	61.8774	54.9482
BnaC02g48890D	61.4771	51.6573	204.139	175.647	38.8809	59.3696	73.9561	66.4343	161.846	147.782	29.3571	15.2615
BnaA09g05860D	96.6263	186.289	90.7158	54.9911	22.9077	58.7777	98.748	193.851	166.297	51.4765	18.3087	46.8181
BnaA10g00670D	152.687	82.2451	93.8746	73.391	141.905	70.2924	91.1842	42.5642	51.4666	51.5984	145.258	89.2877
BnaC03g13330D	126.72	111.455	157.812	96.9015	47.0284	49.945	143.494	93.0764	90.9773	79.0221	44.5371	44.394
BnaC03g71780D	126.51	118.291	100.606	102.256	58.2553	67.7987	154.338	108.23	76.2133	76.7411	50.1516	44.2641
BnaA06g29980D	115.786	107.77	173.847	102.443	59.8736	64.5889	132.781	89.4464	86.4628	63.2465	41.7401	45.2797
BnaA04g11900D	90.434	78.2694	53.6755	53.6329	67.7933	129.167	87.9176	69.4953	35.0096	70.6188	101.242	245.706
BnaC09g33170D	179.504	122.123	80.9169	67.0843	64.7221	54.958	160.411	102.319	69.081	66.154	67.2275	48.1259
BnaA05g27200D	1.68482	7.03694	64.6942	121.616	183.845	149.225	1.21886	11.8648	55.3786	115.53	206.178	164.346
Novel00224	0.125565	0	67.9711	118.042	146.303	169.419	0.160913	0	61.3551	123.955	199.291	195.434
BnaC09g29230D	0.191652	13.502	0.223879	215.042	280.766	0.71367	85.5523	22.2862	84.9534	251.019	127.556	0
BnaA07g08850D	108.163	71.9025	113.589	115.508	134.144	81.3584	85.9844	43.0539	53.5709	85.2869	140.21	48.0196
BnaA04g05050D	183.164	95.3243	122.6	74.0549	45.6953	31.4453	221.801	79.6243	73.073	82.5414	43.2393	27.8965
BnaA06g24700D	71.858	87.0742	66.2589	67.2954	61.4407	99.5929	72.756	94.8663	118.951	88.7277	85.0143	164.416
BnaC08g43450D	60.8231	78.3415	88.5822	48.9471	57.4091	40.204	116.226	171.641	154.427	110.295	90.5311	60.7243
BnaA07g19580D	58.4346	73.2628	169.934	171.256	61.8374	77.9885	77.4526	79.7048	126.445	94.6911	50.3678	36.2376
BnaCnng13150D	149.198	147.43	109.32	80.2893	60.93	54.6498	120.41	103.789	72.3397	78.1695	59.5178	41.4727
BnaAnng02090D	85.517	110.512	151.721	94.9463	50.0603	53.6696	99.6972	131.459	133.984	88.1379	45.1321	32.2863
BnaC09g37170D	129.147	158.592	82.6192	93.0277	71.2934	70.4248	133.124	96.3937	70.3943	84.3191	56.3756	31.2763
BnaA08g24350D	166.178	202.387	76.2092	54.2027	35.3284	32.8145	157.401	160.683	84.7221	60.3371	31.0869	15.3354
BnaC07g29470D	73.8832	64.9132	62.0176	95.97	131.606	101.796	63.9106	48.3416	76.5588	90.6824	145.983	120.548
BnaC04g34470D	239.822	150.525	50.2787	51.6549	38.5853	35.1649	237.913	128.23	46.7883	45.2787	29.3203	22.5128
Novel04159	329.602	125.094	2.70735	2.5128	1.87771	4.08932	374.86	196.298	22.3175	9.57215	1.71797	5.2761
BnaA01g26750D	123.229	112.166	101.85	78.2936	57.6902	54.2389	166.271	98.0007	91.8041	90.1947	59.7297	42.1841
BnaA06g04150D	46.0328	61.4926	94.4781	122.762	145.844	145.563	53.4467	69.3056	76.2227	67.2556	85.2511	107.958
BnaCnng47740D	27.3615	127.329	135.959	122.341	55.666	49.2332	32.9271	135.913	195.892	143.574	28.304	20.8838
BnaC06g29370D	183.034	161.359	87.222	91.7555	66.9026	73.6971	118.062	85.4465	66.0319	65.7835	40.4175	34.6051
BnaC03g48460D	0.0334584	1.46526	96.4996	97.6905	83.7877	110.575	0.0714623	3.87235	87.1758	163.166	156.784	272.735
BnaC02g25630D	13.0345	48.6918	59.455	56.4038	75.0686	125.736	11.1359	51.7495	69.4622	84.383	149.807	328.903
BnaC06g14610D	117.484	139.313	146.332	82.9558	47.2668	54.7261	144.745	112.091	72.3772	59.8035	38.3366	57.5933
BnaC03g73560D	121.059	116.752	125.095	88.4505	75.3788	56.8466	134.947	104.054	76.0698	64.5595	59.365	48.7591
BnaC01g18300D	286.938	107.174	84.4005	45.3013	34.2402	28.4283	224.901	81.4825	84.2062	49.5993	29.9207	14.6735
BnaC08g22640D	54.4991	102.698	82.325	73.4141	38.4448	43.021	74.4493	212.809	187.401	122.629	56.4778	22.6935
BnaA02g31810D	125.131	95.4926	106.845	116.091	54.1478	62.9911	81.2393	70.3793	72.7209	123.605	89.1755	72.9487
BnaC05g20170D	71.876	156.869	81.0619	59.1843	31.8597	69.8532	66.6389	158.426	160.363	85.2651	36.8612	89.4128
BnaC03g25930D	107.64	127.089	102.49	91.8699	54.5573	64.604	124.297	131.072	105.559	76.8756	39.8736	41.1371
BnaAnng41300D	228.598	79.4779	85.7041	63.4359	27.3339	26.9521	250.608	97.6481	84.6265	82.5718	27.6295	12.1081
BnaC06g06870D	80.4182	85.0813	123.777	110.99	75.5019	79.1621	76.0769	76.5744	79.1261	99.0908	97.4381	83.3778
BnaCnng56240D	53.8148	98.8262	108.239	78.4326	65.0189	61.1784	54.9429	121.91	120.839	106.033	97.2546	99.5522
BnaC09g15080D	9.11122	62.047	153.676	139.173	64.9262	102.419	8.34011	67.5189	208.519	164.71	51.5494	33.8617
BnaA09g49810D	122.069	74.6528	239.415	183.114	41.0667	54.958	80.7355	39.3568	121.916	83.844	18.4728	5.99463
BnaC09g33240D	123.898	120.035	163.448	91.3671	53.7467	52.657	122.787	77.4971	75.9891	82.0407	56.0426	45.9729
BnaC07g27160D	2.43073	104.19	89.8063	181.435	22.727	108.951	2.47511	72.5092	240.453	214.737	13.1364	11.7505
BnaA02g33770D	42.2679	69.1739	117.492	116.959	102.656	87.6395	55.8834	73.374	134.48	116.043	91.9565	56.1195
BnaC06g34100D	0	0.0390984	49.1733	116.865	156.291	224.347	0.043858	0	22.5071	89.0984	150.606	254.197
BnaA03g35710D	8.80621	14.8574	63.9356	117.228	140.22	267.32	23.9277	14.1852	31.4438	70.7562	94.4142	215.734
BnaC05g34710D	152.738	91.4032	62.7679	59.3231	36.1964	70.3067	169.421	101.743	78.226	59.6091	46.6192	134.192
BnaA09g04280D	402.109	77.6013	4.76268	4.97927	1.6798	2.54969	470.471	75.1481	12.8283	7.77681	1.26886	0.539784
BnaC04g33700D	77.8293	68.1879	125.923	133.743	73.5549	64.7912	102.953	92.422	120.832	101.128	63.4698	36.5138
BnaA10g02720D	24.3737	122.064	65.8609	65.999	50.9489	66.8886	26.473	150.431	209.381	147.07	73.7968	57.8108
BnaC09g49030D	322.55	125.35	40.8019	32.6548	21.2158	25.8705	263.411	79.0004	50.641	58.5559	21.5361	19.357
BnaA02g30870D	116.3	104.055	131.537	108.329	64.6071	73.5007	93.6289	81.1845	82.1086	75.0996	58.5835	71.4991
BnaC03g27700D	93.6098	284.281	29.7524	21.758	18.016	27.6813	67.0969	271.562	153.189	71.9742	16.3323	4.21784
BnaA03g21770D	111.822	90.8992	189.407	145.598	65.4701	66.8377	87.6344	47.842	62.1943	97.0767	50.1481	44.492
BnaC08g23790D	135.252	131.806	91.1506	78.4692	66.8764	55.9915	129.281	101.579	80.1709	81.2289	59.4586	47.6124
BnaC02g38320D	156.794	136.655	169.272	77.5338	47.4236	50.1511	125.498	81.8619	64.8297	68.3937	42.736	37.5322
BnaCnng28120D	78.0297	99.5446	99.9778	89.8829	64.8688	64.6381	101.487	131.374	116.507	87.0557	64.0431	61.2553
BnaC09g42220D	142.144	153.712	97.1134	61.6558	37.5668	53.8757	134.613	145.022	80.2565	61.2187	36.7166	54.7296
BnaA05g01850D	156.984	86.6682	141.081	89.3281	64.8437	57.2522	194.221	60.8081	62.6546	58.2155	44.331	41.0712
BnaA02g01680D	98.6466	138.47	106.373	61.7679	46.2669	46.4572	123.876	168.431	115.94	70.7903	39.6649	39.3991
BnaA01g32180D	78.0576	99.9956	130.899	87.7131	70.1098	65.654	104.847	103.852	100.652	77.3566	69.9301	66.1873
BnaA05g15290D	221.407	138.425	142.349	83.8579	47.7924	46.9816	150.182	69.3727	45.8813	54.4802	30.8937	23.3887
BnaC03g50030D	148.454	119.835	122.754	75.0391	56.9315	46.2448	137.557	120.646	67.6745	74.4347	41.4628	43.4986
BnaC05g11220D	166.18	175.437	115.623	24.2445	88.3624	26.8455	156.728	117.904	66.1907	25.4815	62.307	28.7067
BnaA03g04370D	72.5965	131.048	110.495	83.1324	59.1138	78.3092	91.7866	131.793	98.8233	70.9811	43.6829	81.9949
BnaCnng73290D	230.83	239.073	37.3717	61.4885	19.0099	29.3414	237.099	97.8868	32.1836	30.983	17.7306	20.6509
BnaC06g10780D	113.904	154.413	132.894	69.4637	61.6204	45.7749	93.4041	126.482	99.8991	63.9423	55.7423	35.3515
BnaA09g43720D	181.341	83.8414	86.7754	70.9845	75.5293	61.3317	189.352	79.8325	53.5995	59.5092	55.5001	55.0389
BnaC06g18230D	355.889	87.5455	16.6472	25.3887	13.766	9.09562	380.28	107.092	16.0454	19.9908	12.9213	7.70515
BnaC02g20980D	129.175	127.161	118.007	81.3202	51.9769	46.9698	112.212	106.498	81.8187	74.9533	56.9341	64.5717
BnaA01g11000D	94.3594	105.961	117.439	101.824	67.4886	72.9081	82.678	97.4358	71.4548	89.4325	76.165	73.8151
BnaA01g08150D	100.214	84.2848	226.598	151.469	32.4218	43.2216	84.7421	65.0802	104.638	115.263	31.8564	11.1449
BnaC05g06450D	115.582	129.53	153.936	86.0418	52.6753	55.7561	120.089	117.411	85.0521	64.0506	36.6731	33.8245
BnaC06g33400D	589.464	108.866	2.46989	3.94647	0.194078	2.29641	305.015	37.112	0.304295	0.312986	0.179585	0
Novel04293	211.169	98.4174	107.901	53.5715	32.0963	24.0096	164.532	101.721	76.5724	96.4774	48.7609	34.7432
BnaC03g25770D	187.338	112.189	90.6851	79.3293	63.4925	51.9309	170.774	88.7332	70.1129	58.9036	36.2457	40.0744
BnaA04g20980D	149.802	210.492	104.226	55.8045	31.0897	31.2068	154.005	147.593	75.6456	47.6618	24.1864	16.9574
BnaA04g08570D	79.6503	48.9723	226.825	157.551	21.1567	39.7106	90.1888	47.0145	127.779	157.8	30.0993	21.1264
BnaA03g49600D	484.448	72.8384	6.88187	6.94928	0	0.0484276	437.9	34.069	0.808554	2.95698	0	0
BnaA06g01680D	91.2093	55.064	241.761	161.206	46.8127	49.0379	73.3533	48.4288	117.247	117.583	32.3352	12.3663
BnaA06g33300D	13.758	55.8085	192.377	174.504	58.528	51.3454	18.5244	85.3929	209.081	111.072	52.1075	23.852
BnaCnng02630D	108.149	104.106	199.583	99.9698	43.9199	45.1539	72.7972	74.0617	120.241	116.56	43.4237	18.1663
BnaA03g57860D	112.783	115.006	157.816	80.8122	43.1269	52.1241	102.998	98.7679	94.4275	91.2695	46.0694	50.9191
BnaC07g47470D	54.9812	41.02	170.331	184.028	80.4124	78.5707	66.3849	45.3205	143.013	104.249	53.8628	23.5062
BnaA08g17430D	76.345	120.534	105.666	101.009	70.7386	83.1732	72.7076	106.571	103.145	78.9274	55.8401	70.3314
BnaAnng21710D	145.404	135.561	114.19	73.6254	66.2844	44.3029	131.848	92.1535	66.3572	73.6058	68.8214	32.7623
BnaA01g18270D	11.0334	6.65612	3.44549	7.22392	111.063	228.346	19.5992	5.15316	2.5155	16.171	153.542	479.901
BnaA09g09910D	84.2721	170.18	91.1506	71.7859	70.7524	66.9537	65.9549	140.44	102.245	78.2891	55.6037	47.0188
BnaC04g16800D	129.678	141.216	136.813	73.7135	44.0386	43.3542	110.869	100.764	74.695	76.3886	54.914	57.9234
BnaC03g15440D	70.4309	100.403	130.034	94.5885	49.4007	73.9778	81.4174	112.408	83.4255	92.7954	55.7184	99.458
BnaA06g30110D	192.105	122.202	72.5203	59.2521	37.2725	24.8044	214.9	116.114	73.5478	72.9666	36.8653	20.0473
BnaC07g26250D	130.097	113.562	130.189	85.4442	55.424	56.0195	127.857	85.4623	72.9242	82.8476	53.9844	47.6193
BnaC09g26420D	64.1926	135.553	76.587	79.069	74.9054	59.7544	70.4475	148.433	137.119	97.1922	66.9489	31.213
BnaC07g04280D	59.0319	115.163	101.847	70.7299	61.3708	69.1032	71.1671	144.946	144.71	82.3361	58.1759	62.4751
BnaC03g24790D	105.193	95.4198	94.4142	80.5827	85.3238	119.857	112.665	65.2839	56.6428	55.5467	48.586	121.503
BnaC05g02580D	126.054	119.491	136.209	90.1544	62.9804	65.683	129.073	86.6934	60.1223	66.7024	43.1157	54.6972
BnaAnng25620D	104.696	158.166	75.1534	79.2927	56.9339	53.6019	85.1477	127.643	106.782	87.5186	65.3485	40.5781
BnaA05g01290D	185.049	93.2865	124.517	86.68	46.6729	46.2264	170.751	69.3624	67.0801	70.3682	44.031	36.3055
BnaA09g02260D	126.193	107.875	108.249	68.2215	62.0729	41.0533	148.603	93.1453	85.0934	76.9069	71.413	50.7287
BnaA01g33400D	125.711	117.419	127.221	77.6914	47.6262	42.7494	131.802	111.653	94.8114	72.7323	50.8692	39.0924
BnaC09g47030D	76.4181	98.2671	94.3366	78.6203	60.108	51.3876	106.468	133.505	120.074	89.1066	78.4083	52.3917
BnaC09g01670D	158.739	103.643	130.163	91.8459	81.9893	61.7202	120.444	65.9538	63.408	69.5017	55.2875	36.2787
BnaA07g24320D	31.3259	19.6606	89.3859	102.256	88.5156	174.852	55.9872	29.2215	71.2151	66.2788	92.8366	217.25
BnaCnng36960D	153.572	95.3099	120.336	78.5772	51.4448	63.9993	145.236	71.1519	62.2799	72.2459	54.5957	69.1848
BnaCnng37100D	20.1561	44.5185	178.985	163.903	58.466	68.9422	25.6817	43.976	186.693	139.655	71.3093	34.605
BnaAnng38170D	103.37	87.1015	149.783	106.174	83.3275	58.6458	98.7254	59.0216	76.0939	92.8214	78.4967	43.326
BnaC04g35170D	37.8669	62.5156	123.034	137.593	46.5849	76.3295	34.7987	79.5761	142.555	165.154	72.1207	58.7394
BnaA10g18500D	199.147	76.5465	15.0941	26.1755	18.1993	83.9501	210.509	84.6853	15.4345	37.3769	41.9463	226.82
BnaC03g76260D	226.539	104.234	34.291	18.6814	31.4602	16.8928	319.68	160.614	48.1318	19.1522	30.7903	24.22
BnaA10g12870D	99.9814	116.95	148.231	85.65	34.7439	64.3863	113.649	136.746	114.697	65.2836	30.3059	23.9875
BnaC01g44140D	192.239	128.671	115.239	83.1945	29.5685	31.915	191.354	91.8536	71.4004	66.4193	20.2997	11.9604
BnaA06g20910D	239.016	131.908	42.626	47.277	29.7671	33.2249	214.542	114.257	62.8876	51.6455	32.4701	34.4851
BnaA10g05530D	45.2773	117.027	75.274	85.2132	86.7255	71.7663	44.1516	131.44	149.211	111.148	80.8399	33.5782
BnaC04g25100D	41.3968	74.1393	89.0291	104.727	105.27	94.5216	54.647	62.093	113.271	136.101	99.883	55.9854
BnaC03g28200D	173.08	151.778	91.8	63.2821	37.001	31.5264	169.233	118.418	96.2966	61.4497	25.4001	11.7718
BnaC08g43200D	57.09	32.7677	140.547	148.038	32.8843	41.5151	120.338	64.1067	164.714	170.659	42.7069	12.977
BnaA01g24560D	0	0.128134	0.0786104	0.3828	88.9245	170.151	0	0	0.103306	2.28452	172.456	593.588
Novel05656	0	0	0.775357	5.30954	15.5361	282.386	0	0	0.286576	9.53064	42.6204	671.405
BnaC07g33000D	121.101	134.879	74.8286	78.7042	51.4088	64.0526	118.069	127.209	87.3574	79.4831	43.0641	47.0516
Novel01526	14.576	22.6886	232.678	231.821	173.731	127.938	5.91716	12.5367	48.3527	61.925	60.4524	34.5911
BnaA06g10170D	56.9287	59.325	122.758	218.753	39.9965	146.292	55.3735	56.2071	70.1506	102.583	23.5231	75.0322
BnaC02g04800D	119.68	177.184	105.162	60.118	39.3115	43.9094	125.213	151.15	92.0595	46.9043	32.1787	33.8433
BnaAnng33170D	8.47323	300.739	159.023	42.1993	10.4902	9.47443	4.26266	252.741	154.478	67.0888	16.0591	1.00019
BnaC03g28080D	136.6	165.667	91.812	39.5944	52.3908	33.9593	118.004	137.022	102.735	57.1279	56.8538	33.6321
BnaA08g00520D	61.1806	54.922	127.487	128.082	105.324	56.5044	68.8674	61.0811	108.203	101.364	113.527	38.0223
BnaA09g44710D	60.4964	75.9918	154.15	108.484	58.726	67.9607	87.7058	97.5915	120.914	81.1254	50.5701	59.7209
BnaA06g15390D	113.627	57.0313	142.87	97.542	10.6845	29.8891	125.035	102.689	231.123	109.091	2.98494	0.395211
BnaC08g24870D	203.611	113.65	175.58	92.0889	38.4181	31.5305	142.103	59.6317	63.9483	60.6314	25.6223	15.9789
Novel01869	0.251543	52.0351	111.534	105.285	101.685	91.7066	1.18965	69.894	171.038	165.284	100.135	51.8387
BnaCnng13340D	68.104	76.8694	68.1343	61.9524	72.689	80.1597	74.8958	97.859	117.853	79.6934	93.6141	129.454
BnaA09g11470D	61.7253	137.311	218.634	103.804	61.9313	47.6013	52.5388	95.9565	117.156	63.2364	41.1112	19.9518
BnaA07g33080D	131.313	110.263	82.5564	65.391	85.335	44.5534	175.946	97.0956	66.9945	62.4397	63.0564	35.1407
Novel04730	363.421	76.5773	46.9407	25.0193	11.3838	8.27087	301.264	76.8274	37.1063	46.6207	18.919	7.21415
BnaAnng40540D	147.608	186.68	78.4095	46.096	40.0217	31.3328	137.008	156.711	90.8498	52.0868	32.3308	20.3633
BnaC08g02310D	213.651	135.502	132.274	42.2366	25.9169	20.6004	182.06	107.511	78.9723	40.4274	25.3733	14.5742
BnaC01g15480D	442.357	25.5899	8.81522	2.75956	9.34129	9.01008	449.149	22.0759	5.54403	0.936214	4.24861	39.2273
BnaC02g33290D	145.215	121.534	120.247	71.1762	50.7125	51.4532	127.729	94.2434	79.3029	64.8011	48.3046	44.2094
BnaC03g33630D	184.299	118.435	136.986	82.6701	59.9187	36.436	175.231	64.6488	45.9464	51.4831	36.9628	25.8532
BnaC09g38180D	143.097	133.703	110.021	72.3757	64.934	44.8937	148.087	104.402	64.9838	48.8917	46.5935	36.8486
BnaC07g00330D	18.853	21.4953	47.6041	89.7755	233.476	116.945	30.7246	39.3211	66.4232	73.835	176.301	103.823
BnaC09g22630D	31.6045	39.5294	50.322	69.6647	50.2504	182.019	29.5202	42.2584	61.2527	68.6436	59.6396	333.554
BnaC02g15660D	117.369	115.484	135.982	83.4247	57.1801	53.1541	123.102	97.7901	76.1694	63.5454	44.4481	48.7703
BnaA01g32050D	132.578	137.192	104.715	85.9171	49.0731	44.8061	125.826	117.375	91.433	66.1838	40.2125	19.9963
BnaC06g16860D	117.206	110.098	93.6022	75.9356	59.5122	74.0107	116.49	103.37	78.8108	63.9829	55.0681	66.9246
BnaA01g16130D	142.924	95.954	166.426	80.2427	42.9745	40.1949	140.272	76.6839	71.1228	75.8495	40.7594	40.9975
BnaC08g24100D	92.1403	154.873	147.837	95.2241	37.3052	46.4959	96.4494	132.993	102.407	66.3415	24.9048	17.3538
BnaC06g31510D	154.679	133.202	103.561	70.229	58.5114	39.5616	116.213	116.483	85.1401	77.2652	37.1347	22.2287
BnaC01g19370D	107.122	78.1566	101.232	99.0377	109.732	80.2453	111.874	53.0341	55.4725	67.4836	82.6762	67.8677
BnaC02g07050D	105.155	127.978	135.404	111.712	38.3949	82.8075	87.7193	75.6553	73.4488	68.0415	32.8929	73.4205
BnaC03g24210D	178.177	95.7534	109.423	64.2841	45.2269	39.5882	204.092	86.9191	71.9954	55.0185	29.5634	32.41
BnaC01g00680D	2.35158	114.219	203.978	146.065	59.4578	46.3578	3.78981	124.18	145.466	100.861	44.1885	20.327
BnaC08g09980D	99.4099	97.5726	165.198	103.592	46.3812	75.0716	94.8145	81.9276	64.4883	74.5629	43.3225	64.8433
BnaC05g06780D	87.1422	143.929	132.891	94.2565	39.5563	54.426	80.8321	126.563	99.7527	83.2712	32.4046	35.5613
BnaC02g15890D	470.719	35.4673	2.12685	2.83818	0.308535	0	451.393	42.0979	3.06375	1.82442	0	0
BnaCnng21840D	108.872	93.8528	151.715	109.479	47.5501	56.6626	124.834	89.7938	93.6933	70.3086	29.5301	32.5734
BnaA10g24180D	0	1.56003	1.51538	4.36931	66.4063	299.162	0.0729139	1.19841	0.471657	3.47676	79.471	550.839
BnaC04g05260D	55.1335	47.8709	204.085	151.469	66.7237	77.687	55.2566	45.8164	118.783	95.6014	52.7371	37.0559
BnaA06g38660D	90.8071	98.7367	109.905	85.1287	46.1008	55.6796	119.433	94.3747	79.5528	94.8427	64.0917	69.5166
BnaA09g33670D	16.1734	32.0109	161.419	152.983	106.733	104.956	19.0902	21.0111	71.5448	109.879	102.522	109.568
BnaC08g30490D	137.625	120.345	176.376	77.6072	41.3629	45.643	118.954	79.7156	66.3688	62.1427	39.2682	41.893
BnaC05g46250D	89.5781	86.5295	127.305	87.0599	56.8913	52.9372	118.342	106.802	99.5133	88.4875	47.2094	46.363
BnaA04g29550D	1.21996	2.53405	13.2793	19.7543	32.4948	316.485	1.89502	2.12915	4.0861	17.7306	56.4062	537.956
BnaC09g02550D	119.744	91.4412	147.77	84.4874	50.8054	56.8592	138.867	81.2834	85.9159	70.9335	38.1901	39.5726
BnaA09g33250D	157.81	139.841	75.7744	63.9894	48.2144	46.3213	150.025	111.769	79.2239	63.524	39.2644	29.5405
BnaA03g09920D	44.975	22.1834	37.7402	72.5119	57.284	173.247	30.7169	11.0917	27.1621	81.4053	90.7918	356.164
BnaA01g10630D	67.4341	85.0782	108.901	111.302	87.8941	70.6533	120.873	121.057	92.6764	51.7471	47.0905	39.0911
BnaA07g03570D	26.2002	39.3178	83.5177	91.791	83.1538	131.408	17.1674	29.4243	55.8319	102.863	153.074	189.736
BnaA01g37290D	32.7001	83.563	109.293	99.1727	48.0716	51.9939	42.377	122.103	190.1	142.797	53.8464	27.438
BnaA01g24280D	16.3295	46.9448	220.096	168.14	47.9857	62.4029	15.0975	47.9363	160.287	131.046	48.7558	37.1177
BnaC02g37910D	171.2	145.009	52.5965	48.9137	22.7445	22.9742	175.885	169.39	86.6481	70.0034	27.638	8.30172
BnaC09g05410D	103.104	149.206	95.8754	55.6828	42.2276	42.1266	117.995	157.454	107.003	63.5452	36.1343	29.5738
BnaC03g77050D	119.445	122.174	98.7231	47.8863	32.6606	26.2254	160.507	111.412	84.1726	109.039	58.975	28.291
BnaC09g24510D	119.664	128.835	114.785	60.5164	49.6662	41.5094	125.293	114.46	82.7164	69.9642	50.786	40.4289
BnaA02g08530D	126.461	98.8898	118.851	80.8692	53.8419	59.0653	141.181	96.8883	78.0232	67.3151	37.4603	39.1962
BnaA10g10840D	99.774	99.9284	160.683	99.7173	47.8306	50.51	89.5382	76.3986	76.5132	97.2414	53.5374	45.9729
BnaC06g06220D	89.2669	127.916	121.416	75.4298	39.7364	46.9072	96.1106	131.268	120.51	79.0497	35.9922	33.8236
BnaC01g21960D	1.45655	2.13781	78.1971	93.7298	100.541	174.544	2.46287	1.13183	44.9297	76.6863	123.591	297.818
BnaC03g44500D	100.605	95.7142	138.458	87.9687	51.4028	51.1456	99.0899	88.0081	80.2602	91.1234	59.812	53.3216
BnaA03g21470D	115.562	142.185	108.378	80.0624	47.7016	52.883	107.913	121.724	66.4811	69.3966	39.0495	45.5351
BnaA07g32260D	171.588	135.015	55.7579	35.8992	25.5834	30.0513	185.661	143.863	93.6515	55.2435	36.362	28.013
BnaA03g38750D	67.9952	5.44308	11.4492	31.4699	90.3026	264.732	110.447	5.15204	11.1669	32.886	75.6507	289.873
BnaA05g33350D	30.9074	46.1667	144.885	184.861	88.3387	139.401	22.6211	24.2605	73.7778	103.652	49.9685	87.2568
BnaC03g70490D	75.2812	45.4117	112.195	123.787	129.318	62.83	76.8371	43.5167	80.8469	88.1107	114.817	42.7091
BnaC05g20290D	132.759	112.091	104.216	68.8571	64.6766	50.0957	136.997	89.0484	74.3296	66.4806	53.3518	42.0257
BnaAnng16520D	66.4604	116.494	115.919	95.425	90.0783	64.5413	43.2758	62.7993	108.209	108.626	84.5957	38.4158
BnaC05g13240D	29.4293	31.2902	125.576	143.635	57.571	140.741	30.2718	42.6675	127.456	97.8622	45.785	122.45
BnaA05g34150D	107.902	130.238	81.8636	65.2044	50.2201	56.695	105.744	126.308	100.501	69.7121	50.2303	48.47
BnaA03g31120D	200.111	119.917	109.243	70.7916	52.1423	42.3228	157.847	70.4519	45.5458	58.0195	37.9578	28.2001
BnaA06g18990D	0	13.5202	39.7417	32.9571	79.073	263.252	0	9.92967	19.7647	30.8634	96.7092	405.835
BnaA09g32300D	221.128	132.794	120.089	58.6254	14.9461	18.1272	181.011	89.9437	71.4932	58.2836	17.346	7.86012
BnaC04g52150D	136.552	86.5106	139.985	106.452	52.6893	47.87	160.852	65.7309	56.9799	71.1523	35.0899	31.5773
BnaA03g48370D	64.732	101.172	99.8035	95.6506	66.7963	90.2195	63.703	92.6398	82.0463	82.2839	58.9599	93.3324
BnaC02g16510D	165.6	135.439	117.653	66.5547	51.0484	37.0838	122.407	82.5268	66.0319	64.6839	46.3085	35.9678
BnaC02g38680D	149.075	123.597	105.123	75.8768	49.6722	42.9116	147.464	92.8036	71.0936	60.3453	45.7592	27.5226
BnaC07g26730D	127.026	96.0133	155.044	88.2023	49.8172	52.7323	129.963	74.0466	75.1005	67.3712	38.0287	37.4729
BnaC07g05810D	57.3883	78.2094	154.834	196.522	98.3485	121.314	43.3983	34.9935	64.7323	61.4066	33.2544	45.7686
BnaC03g59130D	28.4148	63.3388	185.524	164.012	76.471	69.0213	42.5211	68.7284	127.253	88.2246	49.8913	26.7661
BnaA04g01110D	129.724	106.054	128.87	86.7729	50.2688	50.2245	127.945	80.8926	72.4862	63.7477	42.2663	50.7388
BnaA01g08800D	125.01	59.9141	37.34	133.283	61.0536	61.5494	94.4456	66.3293	58.8956	168.122	76.0036	47.9233
BnaA03g21660D	85.2312	97.0142	100.161	90.9059	55.3386	58.4057	114.049	111.602	106.712	79.9789	46.7408	43.0125
BnaA09g43430D	49.3048	370.235	78.5455	31.0291	20.4623	10.5142	45.6043	248.91	104.118	17.7794	9.5862	2.92033
BnaA07g31890D	14.057	32.6531	156.935	160.843	55.9068	52.3956	21.4424	51.8195	176.788	163.504	64.9189	37.6479
BnaC06g36640D	163.999	145.993	117.668	92.3866	52.4432	61.8663	90.316	73.2028	85.8939	56.5445	31.9183	16.1137
BnaC03g74260D	187.12	91.3874	113.779	74.7199	31.2854	26.1572	176.724	95.6407	82.7681	60.0099	35.2705	13.4458
Novel00707	44.9884	40.0634	64.806	48.0736	37.6761	40.5223	79.7591	95.1487	107.911	128.403	172.81	127.207
BnaA03g26470D	24.0664	43.6596	236.177	162.411	62.5464	44.1896	24.8721	34.9181	139.821	132.98	60.8147	18.2732
BnaC02g12780D	153.343	87.1818	93.8964	71.7789	59.2729	74.16	140.571	60.9561	61.9559	57.1773	44.2622	79.5281
BnaC03g13930D	70.6	139.132	121.44	65.1231	29.1124	59.5735	67.2678	129.395	138.505	77.4637	24.8158	60.6888
BnaA07g14320D	310.202	111.331	58.4098	46.9969	10.7407	12.3767	278.58	70.5372	35.5378	38.5499	5.67923	4.03911
BnaA09g06330D	11.1843	37.8864	52.9686	65.7477	40.3005	193.28	10.37	34.7158	40.5275	55.546	51.8716	387.95
BnaA03g15830D	76.4691	84.5258	261.626	100.02	17.8014	34.4326	75.5464	81.0609	162.848	68.2209	12.0934	7.63867
BnaC03g53130D	108.572	143.384	65.4048	56.4243	58.1106	40.2091	125.155	128.214	95.1195	73.2049	59.6501	28.5905
BnaA06g26380D	79.8994	71.6959	127.056	96.4766	66.2679	50.3741	112.492	89.2149	89.9262	90.3074	65.8913	42.3723
BnaA06g40740D	157.468	94.6163	147.738	81.4657	55.175	46.4118	120.172	75.4121	70.5568	57.3215	42.0025	32.8006
BnaC04g44980D	118.108	152.787	76.7514	50.3772	32.9014	56.2696	108.377	125.457	104.691	81.1829	36.7916	36.9883
BnaAnng30450D	107.205	128.23	81.421	62.4924	68.2541	57.1245	94.2745	117.719	79.326	66.0969	68.0009	50.4146
BnaA03g06560D	446.627	33.6072	0.843708	1.15552	0	0	444.377	43.6775	4.78153	5.45269	0	0
BnaA09g46190D	0.971037	91.406	331.363	101.497	23.932	36.3099	0.518499	79.4944	182.653	107.806	15.588	8.91596
BnaCnng40360D	127.02	255.178	98.5022	45.7683	11.325	11.3441	126.346	177.333	62.4765	42.1925	12.8808	9.97946
BnaA07g20510D	87.1625	50.7558	172.185	119.879	36.7765	57.7721	83.0602	45.2357	102.569	142.122	54.26	28.0978
BnaC03g45540D	218.483	117.288	90.7974	66.9198	16.1278	22.1499	190.141	115.825	57.9487	57.3688	14.9234	11.2033
BnaA10g18700D	22.675	100.882	119.333	103.824	55.8714	83.6672	28.6926	119.485	152.12	102.865	42.9422	46.5076
BnaC03g68950D	0	0.0926519	0.0710528	0.181649	5.84223	246.974	0	0.106762	0.0140061	2.69396	47.5873	674.877
BnaC01g22560D	4.61242	244.623	82.8998	25.1154	16.0735	7.73407	9.4482	396.57	141.986	34.0189	13.691	0.522849
BnaA03g31000D	0.189436	179.629	195.99	31.5196	17.3885	43.5009	0.269739	185.996	220.579	84.0516	16.4118	1.15959
BnaA09g07630D	177.021	74.6922	12.036	151.867	57.9764	87.5219	96.644	33.2286	26.5843	149.067	52.1287	57.3711
BnaA08g08500D	103.159	89.5046	33.9812	76.0436	63.5827	104.677	119.844	102.591	76.8943	74.6805	56.1354	74.9329
BnaC07g23030D	16.558	48.9048	187.965	163.829	53.9082	63.5062	21.7916	69.8444	166.725	116.078	42.3663	23.6918
Novel01009	36.7119	75.1686	77.4477	44.8776	66.196	166.15	33.5217	71.6746	92.3048	63.9229	92.6054	154.262
BnaA03g20460D	120.166	87.4839	92.8932	82.4171	82.6374	52.0454	112.03	65.3838	52.8995	77.6206	78.1037	71.131
BnaAnng16450D	89.2649	92.3652	147.065	98.2229	58.9021	58.0793	93.3705	73.3711	82.5894	76.1279	54.8928	50.425
BnaC04g03350D	100.385	97.3251	143.943	97.815	49.4189	57.1964	100.963	69.7346	65.6308	80.8681	51.3185	59.7608
BnaC08g17600D	105.82	117.096	137.451	73.8396	29.6472	42.8847	99.0223	98.977	95.3163	85.8035	39.3054	49.0109
Novel00810	9.98474	38.2532	144.542	141.536	87.3047	88.5214	17.7716	47.4652	102.598	128.096	97.3908	70.3473
BnaA02g01970D	81.1271	77.0247	135.06	101.019	61.8745	49.9714	80.7752	90.0936	88.681	103.494	71.8924	32.4165
BnaC08g02940D	168.024	105.818	98.4426	56.5929	50.2324	35.0831	192.215	97.5847	68.2779	41.6852	30.5751	28.8353
BnaA09g40930D	34.8325	63.5005	70.6599	86.1877	124.763	117.272	36.6986	45.3341	80.8914	97.2476	124.545	91.1975
BnaC06g11040D	60.6224	55.596	238.522	162.186	31.7905	45.9524	54.8744	45.4212	113.431	124.656	23.9868	15.9607
BnaA01g04000D	37.4511	48.1861	22.2011	50.3784	46.9971	261.219	31.0541	38.1624	45.1811	113.276	67.7184	209.676
Novel04999	187.138	66.8836	10.8448	20.3428	13.5077	117.811	163.005	61.1947	14.4866	20.6022	18.4366	277.194
BnaUnng03630D	349.047	82.7009	6.41466	4.67306	0.321734	0.217536	405.448	99.9101	10.1562	11.2073	0.774041	0.238395
BnaA01g04890D	67.874	88.7975	102.736	88.362	73.3576	71.5844	58.6864	70.4445	87.7234	103.429	81.3312	76.7134
BnaA06g34780D	51.8633	79.415	156.974	123.642	49.8253	58.9782	77.8692	109.602	132.064	77.809	32.484	20.0176
BnaCnng38880D	0.633285	0.452182	27.834	55.2179	66.8782	120.76	0.676303	1.56314	38.006	92.7135	196.786	368.752
BnaA01g16270D	121.151	74.5216	132.12	82.1737	47.4981	45.0632	155.783	78.302	82.0848	76.648	40.3513	34.189
BnaA09g38720D	36.9707	43.951	143.152	114.103	55.4911	60.0188	30.8942	45.8606	107.666	119.862	101.399	110.454
BnaA03g48640D	67.8534	69.323	85.3145	89.5478	75.0001	72.6495	61.9416	73.1608	92.1444	98.3711	93.8911	89.6046
BnaCnng05660D	121.171	120.591	88.9361	54.3974	53.9633	52.7415	111.008	88.3734	82.7184	80.3985	53.0074	60.8528
BnaC01g34160D	119.247	117.318	128.446	90.4896	44.5328	55.5062	111.429	104.161	76.1703	59.485	31.5298	29.1643
BnaA09g06690D	112.525	71.8394	167.443	132.813	36.2377	32.998	95.5551	50.8458	110.144	100.054	39.9032	16.8785
BnaCnng27520D	101.682	85.2815	119.495	93.8644	63.3409	65.8461	140.228	74.1096	74.0061	57.5945	42.7557	48.9486
BnaA03g48600D	18.3325	104.958	87.0541	128.702	66.1115	96.3208	18.3709	90.6383	95.777	136.059	56.4393	68.2147
BnaC04g39030D	29.0329	44.2919	8.25515	9.45309	36.0337	205.37	24.7789	37.9873	23.1548	28.3842	73.0481	447.089
BnaC01g39780D	155.084	121.924	111.09	60.234	48.776	36.0786	168.639	89.8807	57.3849	45.0477	38.1747	33.7334
BnaA05g13640D	59.8454	63.8868	254.667	164.279	28.6247	51.2912	40.7231	39.3018	98.4327	118.6	27.0404	18.5518
BnaC07g26840D	490.162	25.3222	0.138707	0.506586	0	0	422.393	23.7076	1.23041	1.12494	0	0
BnaC03g56240D	140.418	152.458	43.512	63.9033	36.2415	35.7513	142.974	143.311	61.2295	74.6092	44.0214	26.0093
BnaC09g39020D	165.901	105.393	0.853734	8.00014	137.742	44.4033	152.318	96.2103	4.07441	23.0493	183.48	42.2252
BnaA10g23900D	3.41047	18.8218	66.2331	73.2054	128.135	75.7361	5.63393	36.0692	98.1046	121.543	256.36	79.863
BnaC02g44280D	481.4	46.275	27.8163	5.8912	0.676003	2.74242	330.455	47.1284	12.7188	7.12249	0.500417	0.125224
BnaC09g00190D	38.3616	15.4793	128.007	148.489	201.014	81.4635	29.6629	11.8912	70.8826	81.2309	123.081	32.9165
BnaA03g57870D	129.318	103.939	141.637	80.9306	46.6137	42.3487	130.08	86.3718	79.5443	59.0896	33.7372	28.3811
BnaCnng30350D	75.3034	137.041	72.637	90.1569	69.2622	75.1986	67.7565	111.547	91.7238	85.1145	52.7181	33.3669
BnaA08g14130D	82.8895	72.9837	66.2681	60.0972	60.3753	39.3708	157.289	122.995	90.1388	85.9047	64.95	58.1688
BnaA06g17070D	141.898	112.189	105.618	75.2389	50.5636	43.1315	114.428	77.1316	66.7679	65.7849	59.9356	48.4924
BnaCnng74930D	144.095	64.6151	44.8246	56.6909	81.2301	30.31	127.969	165.192	89.0995	75.084	53.3323	28.7209
BnaA04g23920D	118.852	106.701	70.509	73.3011	63.3628	55.3546	130.322	76.6071	70.6888	89.5749	64.3393	41.5467
BnaA01g36110D	213.415	185.595	57.6222	18.1379	3.7215	3.35498	213.239	178.032	56.4043	28.6743	2.41052	0
BnaC02g29720D	97.5588	89.8749	127.859	92.953	41.1791	45.7264	102.566	99.0352	103.52	86.8561	40.4546	32.6299
BnaC06g36070D	349.703	78.7442	57.273	51.5994	23.063	22.5996	236.102	53.9284	21.8609	42.9686	14.4481	7.56264
BnaC02g09720D	117.952	145.43	89.8787	42.9673	60.6839	58.6087	120.654	108.135	55.7004	34.8562	49.9008	75.0525
BnaC06g38230D	185.581	156.064	46.8913	31.9209	37.1309	34.14	151.523	135.158	70.6648	51.7471	32.8428	25.5213
BnaC07g50710D	527.13	64.0725	10.4823	7.28218	0.515693	0.774842	323.696	20.3301	2.69518	1.57089	0.0795306	0.159213
BnaC09g02910D	123.019	102.838	140.277	69.6481	46.6048	34.9112	114.573	97.7508	91.9848	73.6624	31.5748	31.8546
BnaCnng63170D	77.1873	97.4551	75.0667	82.3264	86.8187	64.3142	87.8917	113.467	92.6026	67.4413	71.3748	41.96
BnaC02g23320D	118.13	111.495	97.7293	80.5472	49.0282	57.1867	131.951	86.4938	70.8559	68.6211	37.2757	47.6948
BnaA05g28690D	144.773	92.9713	116.525	77.6766	53.6009	46.9797	143.176	73.5992	68.8587	68.9961	40.3758	27.3558
BnaA09g39940D	69.2204	79.0219	86.5249	98.3299	80.9125	70.9668	81.5545	87.6406	73.7606	73.9935	80.2293	72.7025
Novel01394	90.7365	119.423	93.0129	83.3182	63.1725	59.9667	95.9446	103.104	81.808	71.4311	51.5921	41.073
BnaA06g35190D	535.575	59.073	4.76414	3.10706	0.80219	0.180796	320.743	24.9269	3.354	1.20743	0.148457	0.148599
BnaC01g20070D	102.701	72.2796	132.651	93.0293	68.5382	52.3686	109.787	74.5343	81.813	68.131	51.1689	45.4881
BnaC06g21950D	123.476	87.4561	124.517	81.2073	44.3028	32.6666	129.919	96.0543	92.6162	81.7369	33.5716	24.8228
BnaA05g15360D	111.868	224.761	76.0216	45.4539	29.7171	33.2137	105.311	143.513	85.6119	42.2989	25.8716	27.95
BnaA06g18620D	8.28951	109.467	51.7449	71.5767	66.8177	82.9005	6.17623	92.7944	160.154	169.015	85.9742	46.5902
BnaC07g13820D	139.993	103.633	107.967	78.5787	40.2674	43.7221	138.295	85.5871	85.4181	70.6429	32.833	24.4399
BnaA03g24090D	81.3037	62.2241	198.964	139.967	41.0141	45.5261	92.039	69.2527	133.75	64.2435	15.6828	6.78182
BnaC06g20480D	94.969	109.302	108.249	88.346	55.7845	60.1616	122.249	109.051	81.6815	57.9429	30.7579	32.1965
BnaC09g43160D	107.855	75.7049	103.902	100.782	58.0264	53	98.245	80.847	72.3367	95.2856	65.9014	38.5264
BnaCnng06460D	152.098	130.111	121.364	60.9462	27.8523	31.3865	170.996	95.8727	67.0214	48.1284	29.1204	15.3535
BnaC06g41850D	117.274	92.3781	131.552	81.1321	58.5717	47.0602	132.703	74.3718	66.0319	64.5887	49.1219	34.3363
BnaA03g18340D	72.2598	131.799	52.5663	43.2922	53.3199	55.8976	97.3969	184.965	90.5812	50.4416	59.485	56.9858
BnaA06g15180D	95.3542	137.855	65.3037	63.2105	22.2145	47.212	98.6197	130.661	134.635	110.198	21.0965	21.3875
BnaC09g31750D	168.44	104.794	74.3789	56.1491	56.4971	32.0268	191.326	93.9324	61.8095	50.6382	35.5237	21.0162
BnaA05g03490D	32.4736	45.4296	94.4066	124.601	109.194	86.5529	22.9262	37.89	70.0836	118.458	132.116	72.3867
BnaC07g48970D	105.477	133.481	69.4531	60.5405	62.8066	39.3507	99.557	121.177	101.257	68.3551	54.8815	29.9709
BnaA06g35090D	46.6198	105.58	59.6163	69.8446	54.4715	54.8	66.7308	173.348	129.713	86.2214	49.8509	49.4682
BnaC04g47370D	119.776	111.802	118.724	75.1105	39.7514	40.9213	102.288	75.1145	75.9143	70.4592	55.4726	60.7001
BnaA04g19620D	67.8519	73.1565	62.5372	62.9976	72.085	90.2438	64.1642	68.741	69.8403	76.6564	90.6995	146.684
BnaC04g54050D	72.4529	98.037	85.0381	94.803	58.5211	69.1945	84.0899	106.623	92.4553	79.2785	49.5429	55.3501
BnaA09g35930D	112.267	149.043	96.1989	84.787	58.961	38.5931	94.3169	102.049	61.4363	67.2712	53.3589	26.6621
BnaC07g48050D	127.981	145.635	70.2554	36.2773	34.2833	30.831	141.863	180.19	77.0104	40.2388	34.4938	25.5658
BnaA01g25880D	65.6616	40.953	118.755	92.9631	55.3682	40.3655	118.427	69.0898	127.342	107.96	81.7043	25.8594
BnaA04g14520D	82.5135	104.002	115.044	83.6896	52.1016	68.9	102.331	99.766	86.7018	60.2841	38.094	50.6897
BnaA09g33390D	127.089	81.5689	106.911	67.7412	38.757	36.3432	183.133	75.667	87.9695	71.3779	38.3874	29.1583
BnaA05g29640D	30.5721	72.8754	151.313	86.2335	53.8154	47.1569	44.7309	89.0796	167.341	90.8803	78.6545	31.2694
BnaA01g13170D	70.0937	104.206	105.98	83.9671	50.4985	56.6841	82.0078	121.805	95.754	70.4948	49.2464	52.6188
BnaA10g14850D	104.797	114.402	70.23	70.7125	66.4711	79.3946	99.1226	89.1781	49.0089	62.6318	64.8092	72.4037
BnaC09g37220D	69.3873	111.39	67.3257	77.2212	70.8693	100.716	60.1816	67.7721	42.5033	68.0742	71.4898	136.199
BnaC01g28900D	41.4971	45.6491	212.656	176.571	43.3667	86.0906	38.2088	31.3677	101.971	103.234	28.172	34.2576
BnaA02g19260D	56.4181	75.2342	131.449	130.113	58.5867	69.2627	63.8493	79.822	101.234	84.1722	46.369	45.9263
BnaC06g30350D	7.6049	153.563	84.2231	77.9753	58.8221	37.0806	7.85226	175.521	210.867	87.1242	37.0429	4.62944
BnaCnng70680D	143.459	110.62	118.963	79.5383	56.4848	29.2487	115.216	80.6202	66.1099	64.577	49.5982	27.4479
BnaA02g04940D	111.153	129.482	117.083	77.094	47.8306	50.058	107.718	91.0791	67.4993	62.8512	36.2792	43.5582
BnaA03g00410D	126.9	100.725	74.8184	44.0522	53.7357	48.1092	123.214	74.6953	62.543	61.6712	77.3299	93.129
BnaC03g05910D	88.1158	128.572	96.8222	59.213	50.296	59.5839	96.5395	123.233	83.8834	52.808	43.7713	57.9065
BnaC09g05910D	15.5192	15.4352	31.7002	50.2124	48.3224	195.432	18.703	18.1664	32.0427	64.6839	82.5351	367.872
BnaCnng76770D	60.2543	100.271	68.3834	64.684	46.6745	66.2177	95.6839	163.639	123.181	64.6839	38.0463	48.478
BnaA01g27090D	62.6242	78.3845	96.232	79.6717	45.2182	55.8946	76.3339	119.134	112.827	91.0477	58.6015	64.0306
BnaC03g44640D	118.427	126.886	116.493	46.2933	34.0536	29.3511	98.1507	106.549	130.838	64.4756	37.3267	31.1022
BnaA09g43600D	78.369	71.7838	64.499	34.9545	31.2592	27.709	170.682	151.234	86.8122	84.5109	59.9073	77.7723
BnaC09g47090D	256.095	118.695	24.4088	19.8232	14.2537	15.8804	337.733	102.267	20.3435	12.5461	10.4617	6.50745
BnaA03g23510D	20.1794	122.722	36.4045	57.9662	57.8245	80.4544	21.3233	152.498	141.113	121.21	70.3934	56.8702
BnaA10g21910D	84.2471	89.2335	95.1466	86.3608	68.2984	54.5644	94.3564	101.769	87.0364	63.9077	63.1091	50.6872
BnaA09g52470D	40.1572	84.5327	152.827	149.046	66.2769	85.6975	33.6454	67.8779	72.5471	75.7577	44.8044	65.1311
BnaC02g27240D	124.945	96.3642	48.5519	56.3459	84.888	53.2855	155.671	81.548	60.3328	58.6198	74.8955	42.8384
BnaA02g01980D	54.4678	109.158	101.981	67.0695	53.2883	57.8093	70.03	150.892	111.507	71.0254	47.001	43.9242
BnaC07g50070D	112.658	100.938	120.14	75.2898	54.7823	44.8211	128.795	97.1365	77.386	56.075	38.9093	31.2058
BnaA04g01840D	0.0384654	40.612	138.35	132.515	63.6809	107.953	0.492939	41.6067	153.587	155.332	55.9459	47.7977
BnaC01g22750D	103.856	108.113	114.968	96.6803	52.217	64.393	91.5934	77.2556	81.2566	66.6695	40.187	39.7589
BnaC08g13570D	113.165	82.0296	115.209	74.5859	43.9792	41.1566	115.758	88.7835	86.1825	80.1716	55.2794	40.1061
BnaC01g38130D	0.245487	0.116856	0.430149	3.53472	17.4409	228.535	0.393243	0.269305	0	12.5007	70.1835	602.704
BnaCnng78320D	344.393	153.537	36.3099	8.40829	0.7443	2.37645	235.73	113.416	27.2297	9.46919	4.13231	0.229793
BnaC05g43680D	128.598	122.065	67.9099	71.8849	79.5153	58.5209	121.506	85.7808	67.9627	56.9672	52.7414	22.3551
[truncated: 105,043 more rows]
